# Supplementary material for: Comprehensive Analysis Identified ETV7 as a Potential Prognostic Biomarker in Bladder Cancer
Source: Hindawi journal article supplement (doi:10.1155/2021/8530186), 2021-01-01

## Supplementary Table S1-S13

## Supplementary Table S1

| Species      | Symbol     | Ensembl         | Family    | Protein           | Entrez ID |
|--------------|------------|-----------------|-----------|-------------------|-----------|
| Homo_sapiens | ZBTB8B     | ENSG00000273274 | ZBTB      | ENSP00000476499;  | 728116    |
| Homo_sapiens | GSX2       | ENSG00000180613 | Homeobox  | ENSP00000319118;  | 170825    |
| Homo_sapiens | TBX2       | ENSG00000121068 | T-box     | ENSP00000404781;  | 6909      |
| Homo_sapiens | PAX8       | ENSG00000125618 | PAX       | ENSP00000395498;  | 7849      |
| Homo_sapiens | CREB3L1    | ENSG00000157613 | TF_bZIP   | ENSP00000481956;  | 90993     |
| Homo_sapiens | NKX6-1     | ENSG00000163623 | Homeobox  | ENSP00000295886;  | 4825      |
| Homo_sapiens | ZNF621     | ENSG00000172888 | zf-C2H2   | ENSP00000386051;  | 285268    |
| Homo_sapiens | ZNF138     | ENSG00000197008 | zf-C2H2   | ENSP00000303533;  | 7697      |
| Homo_sapiens | ZNF654     | ENSG00000175105 | zf-C2H2   | ENSP00000312141;  | 55279     |
| Homo_sapiens | POU3F3     | ENSG00000198914 | Pou       | ENSP00000355001;  | 5455      |
| Homo_sapiens | ALX1       | ENSG00000180318 | Homeobox  | ENSP00000315417;  | 8092      |
| Homo_sapiens | EMX1       | ENSG00000135638 | Homeobox  | ENSP00000258106;  | 2016      |
| Homo_sapiens | ZNF718     | ENSG00000250312 | zf-C2H2   | ENSP00000476435;  | 255403    |
| Homo_sapiens | VSX2       | ENSG00000119614 | Homeobox  | ENSP00000261980;  | 338917    |
| Homo_sapiens | POU1F1     | ENSG00000064835 | Pou       | ENSP00000454072;  | 5449      |
| Homo_sapiens | RARA       | ENSG00000131759 | THR-like  | ENSP00000377649;  | 5914      |
| Homo_sapiens | TLX3       | ENSG00000164438 | Homeobox  | ENSP00000296921;  | 30012     |
| Homo_sapiens | ZIC2       | ENSG00000043355 | zf-C2H2   | ENSP00000365514;  | 7546      |
| Homo_sapiens | ZNF226     | ENSG00000167380 | zf-C2H2   | ENSP00000465121;  | 7769      |
| Homo_sapiens | ZNF808     | ENSG00000198482 | zf-C2H2   | ENSP00000420522;  | 388558    |
| Homo_sapiens | AC067968.1 | ENSG00000267022 | zf-C2H2   | ENSP00000467018;- |           |
| Homo_sapiens | NR3C1      | ENSG00000113580 | ESR-like  | ENSP00000427672;  | 2908      |
| Homo_sapiens | HIC2       | ENSG00000169635 | ZBTB      | ENSP00000385319;  | 23119     |
| Homo_sapiens | ZNF442     | ENSG00000198342 | zf-C2H2   | ENSP00000440162;  | 79973     |
| Homo_sapiens | FOSL1      | ENSG00000175592 | TF_bZIP   | ENSP00000310170;  | 8061      |
| Homo_sapiens | MTF1       | ENSG00000188786 | zf-C2H2   | ENSP00000362127;  | 4520      |
| Homo_sapiens | YBX3       | ENSG00000060138 | CSD       | ENSP00000279550;  | 8531      |
| Homo_sapiens | ZNF705A    | ENSG00000196946 | zf-C2H2   | ENSP00000379816;  | 440077    |
| Homo_sapiens | NFE2       | ENSG00000123405 | TF_bZIP   | ENSP00000397185;  | 4778      |
| Homo_sapiens | RAX2       | ENSG00000173976 | Homeobox  | ENSP00000450687;  | 84839     |
| Homo_sapiens | SP1        | ENSG00000185591 | zf-C2H2   | ENSP00000329357;  | 6667      |
| Homo_sapiens | ARID3A     | ENSG00000116017 | ARID      | ENSP00000263620;  | 1820      |
| Homo_sapiens | FEZF1      | ENSG00000128610 | zf-C2H2   | ENSP00000392727;  | 389549    |
| Homo_sapiens | THAP4      | ENSG00000176946 | THAP      | ENSP00000385006;  | 51078     |
| Homo_sapiens | ZNF286A    | ENSG00000187607 | zf-C2H2   | ENSP00000466154;  | 57335     |
| Homo_sapiens | FOXQ1      | ENSG00000164379 | Fork_head | ENSP00000296839;  | 94234     |
| Homo_sapiens | AIRE       | ENSG00000160224 | SAND      | ENSP00000291582;  | 326       |
| Homo_sapiens | SNAI3      | ENSG00000185669 | zf-C2H2   | ENSP00000327968;  | 333929    |
| Homo_sapiens | ZNF224     | ENSG00000267680 | zf-C2H2   | ENSP00000337368;  | 7767      |
| Homo_sapiens | ATOH8      | ENSG00000168874 | bHLH      | ENSP00000304676;  | 84913     |
| Homo_sapiens | MECOM      | ENSG00000085276 | zf-C2H2   | ENSP00000420072;  | 2122      |
| Homo_sapiens | ZNF45      | ENSG00000124459 | zf-C2H2   | ENSP00000269973;  | 7596      |
| Homo_sapiens | ZNF674     | ENSG00000251192 | zf-C2H2   | ENSP00000428248;  | 641339    |
| Homo_sapiens | ZXDA       | ENSG00000198205 | zf-C2H2   | ENSP00000351530;  | 7789      |
| Homo_sapiens | ST18       | ENSG00000147488 | zf-C2HC   | ENSP00000428521;  | 9705      |
| Homo_sapiens | NKX6-2     | ENSG00000148826 | Homeobox  | ENSP00000357581;  | 84504     |
| Homo_sapiens | ZNF689     | ENSG00000156853 | zf-C2H2   | ENSP00000287461;  | 115509    |
| Homo_sapiens | ZNF449     | ENSG00000173275 | zf-C2H2   | ENSP00000339585;  | 203523    |
| Homo_sapiens | ZNF2       | ENSG00000275111 | zf-C2H2   | ENSP00000480057;  | 7549      |
| Homo_sapiens | TFDP2      | ENSG00000114126 | E2F       | ENSP00000418122;  | 7029      |
| Homo_sapiens | ZBTB25     | ENSG00000089775 | ZBTB      | ENSP00000378204;  | 7597      |
| Homo_sapiens | PIAS4      | ENSG00000105229 | zf-MIZ    | ENSP00000262971;  | 51588     |
| Homo_sapiens | HES4       | ENSG00000188290 | bHLH      | ENSP00000393198;  | 57801     |
| Homo_sapiens | ZNF592     | ENSG00000166716 | zf-C2H2   | ENSP00000452877;  | 9640      |
| Homo_sapiens | WT1        | ENSG00000184937 | zf-C2H2   | ENSP00000491511;  | 7490      |
| Homo_sapiens | ZBTB49     | ENSG00000168826 | ZBTB      | ENSP00000338807;  | 166793    |
| Homo_sapiens | PAX5       | ENSG00000196092 | PAX       | ENSP00000429197;  | 5079      |

|              |         |                 |           |                  |        |
|--------------|---------|-----------------|-----------|------------------|--------|
| Homo_sapiens | MAFG    | ENSG00000197063 | TF_bZIP   | ENSP00000376173; | 4097   |
| Homo_sapiens | ZNF837  | ENSG00000152475 | zf-C2H2   | ENSP00000405699; | 116412 |
| Homo_sapiens | FOXD4   | ENSG00000170122 | Fork_head | ENSP00000371940; | 2298   |
| Homo_sapiens | GATA3   | ENSG00000107485 | zf-GATA   | ENSP00000341619; | 2625   |
| Homo_sapiens | HOMEZ   | ENSG00000215271 | Homeobox  | ENSP00000453979; | 57594  |
| Homo_sapiens | ZNF26   | ENSG00000198393 | zf-C2H2   | ENSP00000333725; | 7574   |
| Homo_sapiens | ZSCAN20 | ENSG00000121903 | zf-C2H2   | ENSP00000355053; | 7579   |
| Homo_sapiens | MEOX2   | ENSG00000106511 | Homeobox  | ENSP00000262041; | 4223   |
| Homo_sapiens | DMRTA1  | ENSG00000176399 | DM        | ENSP00000319651; | 63951  |
| Homo_sapiens | ZNF567  | ENSG00000189042 | zf-C2H2   | ENSP00000467712; | 163081 |
| Homo_sapiens | OVOL1   | ENSG00000172818 | zf-C2H2   | ENSP00000434220; | 5017   |
| Homo_sapiens | PRRX2   | ENSG00000167157 | Homeobox  | ENSP00000361547; | 51450  |
| Homo_sapiens | MAFB    | ENSG00000204103 | TF_bZIP   | ENSP00000362410; | 9935   |
| Homo_sapiens | ZNF195  | ENSG0000005801  | zf-C2H2   | ENSP00000387998; | 7748   |
| Homo_sapiens | ZNF75D  | ENSG00000186376 | zf-C2H2   | ENSP00000359800; | 7626   |
| Homo_sapiens | PIAS2   | ENSG00000078043 | zf-MIZ    | ENSP00000317163; | 9063   |
| Homo_sapiens | FOXJ1   | ENSG00000129654 | Fork_head | ENSP00000323880; | 2302   |
| Homo_sapiens | GRHL1   | ENSG00000134317 | CP2       | ENSP00000418275; | 29841  |
| Homo_sapiens | KLF11   | ENSG00000172059 | zf-C2H2   | ENSP00000444690; | 8462   |
| Homo_sapiens | ATF2    | ENSG00000115966 | TF_bZIP   | ENSP00000407911; | 1386   |
| Homo_sapiens | NFAT5   | ENSG00000102908 | RHD       | ENSP00000455628; | 10725  |
| Homo_sapiens | MXD1    | ENSG00000059728 | bHLH      | ENSP00000410672; | 4084   |
| Homo_sapiens | SMAD3   | ENSG00000166949 | MH1       | ENSP00000332973; | 4088   |
| Homo_sapiens | DMRT2   | ENSG00000173253 | DM        | ENSP00000397494; | 10655  |
| Homo_sapiens | BARHL1  | ENSG00000125492 | Homeobox  | ENSP00000263610; | 56751  |
| Homo_sapiens | IKZF4   | ENSG00000123411 | zf-C2H2   | ENSP00000450020; | 64375  |
| Homo_sapiens | ZNF607  | ENSG00000198182 | zf-C2H2   | ENSP00000347338; | 84775  |
| Homo_sapiens | E2F7    | ENSG00000165891 | E2F       | ENSP00000449284; | 144455 |
| Homo_sapiens | ZNF595  | ENSG00000272602 | zf-C2H2   | ENSP00000477392; | 152687 |
| Homo_sapiens | ETV5    | ENSG00000244405 | ETS       | ENSP00000413755; | 2119   |
| Homo_sapiens | CSRNP3  | ENSG00000178662 | CSRNP_N   | ENSP00000344042; | 80034  |
| Homo_sapiens | CEBPD   | ENSG00000221869 | TF_bZIP   | ENSP00000386165; | 1052   |
| Homo_sapiens | ZNF669  | ENSG00000188295 | zf-C2H2   | ENSP00000342818; | 79862  |
| Homo_sapiens | TBX22   | ENSG00000122145 | T-box     | ENSP00000487527; | 50945  |
| Homo_sapiens | ZNF304  | ENSG00000131845 | zf-C2H2   | ENSP00000401642; | 57343  |
| Homo_sapiens | FOXN4   | ENSG00000139445 | Fork_head | ENSP00000347354; | 121643 |
| Homo_sapiens | TBX6    | ENSG00000149922 | T-box     | ENSP00000279386; | 6911   |
| Homo_sapiens | ZBED2   | ENSG00000177494 | zf-BED    | ENSP00000321370; | 79413  |
| Homo_sapiens | HES5    | ENSG00000197921 | bHLH      | ENSP00000367714; | 388585 |
| Homo_sapiens | ZNF283  | ENSG00000167637 | zf-C2H2   | ENSP00000468708; | 284349 |
| Homo_sapiens | PLAG1   | ENSG00000181690 | zf-C2H2   | ENSP00000404067; | 5324   |
| Homo_sapiens | ZNF512B | ENSG00000196700 | zf-C2H2   | ENSP00000358904; | 57473  |
| Homo_sapiens | ZNF486  | ENSG00000256229 | zf-C2H2   | ENSP00000335042; | 90649  |
| Homo_sapiens | ZMIZ2   | ENSG00000122515 | zf-MIZ    | ENSP00000409648; | 83637  |
| Homo_sapiens | TERF2   | ENSG00000132604 | MYB       | ENSP00000254942; | 7014   |
| Homo_sapiens | TFAM    | ENSG00000108064 | HMG       | ENSP00000363002; | 7019   |
| Homo_sapiens | LCORL   | ENSG00000178177 | HTH       | ENSP00000371661; | 254251 |
| Homo_sapiens | THAP5   | ENSG00000177683 | THAP      | ENSP00000400500; | 168451 |
| Homo_sapiens | TCF15   | ENSG00000125878 | bHLH      | ENSP00000246080; | 6939   |
| Homo_sapiens | ZNF75A  | ENSG00000162086 | zf-C2H2   | ENSP00000482769; | 7627   |
| Homo_sapiens | HMGB2   | ENSG00000164104 | HMG       | ENSP00000296503; | 3148   |
| Homo_sapiens | EGR3    | ENSG00000179388 | zf-C2H2   | ENSP00000318057; | 1960   |
| Homo_sapiens | ZFP69B  | ENSG00000187801 | zf-C2H2   | ENSP00000354547; | 65243  |
| Homo_sapiens | USF1    | ENSG00000158773 | bHLH      | ENSP00000356998; | 7391   |
| Homo_sapiens | TBR1    | ENSG00000136535 | T-box     | ENSP00000387023; | 10716  |
| Homo_sapiens | SMAD2   | ENSG00000175387 | MH1       | ENSP00000467075; | 4087   |
| Homo_sapiens | ZNF165  | ENSG00000197279 | zf-C2H2   | ENSP00000366542; | 7718   |
| Homo_sapiens | HOXA11  | ENSG00000005073 | Homeobox  | ENSP00000448962; | 3207   |

|              |                |                 |          |                   |           |
|--------------|----------------|-----------------|----------|-------------------|-----------|
| Homo_sapiens | LMX1A          | ENSG00000162761 | Homeobox | ENSP00000356868;  | 4009      |
| Homo_sapiens | LHX6           | ENSG00000106852 | Homeobox | ENSP00000362860;  | 26468     |
| Homo_sapiens | ZNF155         | ENSG00000204920 | zf-C2H2  | ENSP00000385163;  | 7711      |
| Homo_sapiens | ZNF16          | ENSG00000170631 | zf-C2H2  | ENSP00000378369;  | 7564      |
| Homo_sapiens | ZNF225         | ENSG00000256294 | zf-C2H2  | ENSP00000468686;  | 7768      |
| Homo_sapiens | ZSCAN10        | ENSG00000130182 | zf-C2H2  | ENSP00000459520;  | 84891     |
| Homo_sapiens | HNF1B          | ENSG00000275410 | Homeobox | ENSP00000482529;  | 6928      |
| Homo_sapiens | AC008758.1     | ENSG00000196826 | zf-C2H2  | ENSP00000404127;- |           |
| Homo_sapiens | HOXA13         | ENSG00000106031 | Homeobox | ENSP00000222753;  | 3209      |
| Homo_sapiens | MKX            | ENSG00000150051 | Homeobox | ENSP00000452751;  | 283078    |
| Homo_sapiens | TBX1           | ENSG00000184058 | T-box    | ENSP00000331791;  | 6899      |
| Homo_sapiens | ZNF70          | ENSG00000187792 | zf-C2H2  | ENSP00000339314;  | 7621      |
| Homo_sapiens | ZNF282         | ENSG00000170265 | zf-C2H2  | ENSP00000477841;  | 8427      |
| Homo_sapiens | PRDM13         | ENSG00000112238 | zf-C2H2  | ENSP00000358217;  | 59336     |
| Homo_sapiens | ZNF786         | ENSG00000197362 | zf-C2H2  | ENSP00000313516;  | 136051    |
| Homo_sapiens | ZNF547         | ENSG00000152433 | zf-C2H2  | ENSP00000282282;  | 284306    |
| Homo_sapiens | EOMES          | ENSG00000163508 | T-box    | ENSP00000295743;  | 8320      |
| Homo_sapiens | HOXB1          | ENSG00000120094 | Homeobox | ENSP00000355140;  | 3211      |
| Homo_sapiens | ZKSCAN3        | ENSG00000189298 | zf-C2H2  | ENSP00000341883;  | 80317     |
| Homo_sapiens | ZNF648         | ENSG00000179930 | zf-C2H2  | ENSP00000344129;  | 127665    |
| Homo_sapiens | MECP2          | ENSG00000169057 | MBD      | ENSP00000301948;  | 4204      |
| Homo_sapiens | WIZ            | ENSG00000011451 | zf-C2H2  | ENSP00000445824;  | 58525     |
| Homo_sapiens | ZNF317         | ENSG00000130803 | zf-C2H2  | ENSP00000353554;  | 57693     |
| Homo_sapiens | ZGLP1          | ENSG00000220201 | zf-GATA  | ENSP00000385403;  | 100125288 |
| Homo_sapiens | BACH2          | ENSG00000112182 | TF_bZIP  | ENSP00000437473;  | 60468     |
| Homo_sapiens | IRX4           | ENSG00000113430 | Homeobox | ENSP00000424235;  | 50805     |
| Homo_sapiens | IRF4           | ENSG00000137265 | IRF      | ENSP00000436094;  | 3662      |
| Homo_sapiens | HOXA9          | ENSG00000078399 | Homeobox | ENSP00000343619;  | 3205      |
| Homo_sapiens | SMAD7          | ENSG00000101665 | MH1      | ENSP00000467621;  | 4092      |
| Homo_sapiens | ZNF613         | ENSG00000176024 | zf-C2H2  | ENSP00000490115;  | 79898     |
| Homo_sapiens | SOX30          | ENSG00000039600 | HMG      | ENSP00000427984;  | 11063     |
| Homo_sapiens | TSC22D4        | ENSG00000166925 | TSC22    | ENSP00000377560;  | 81628     |
| Homo_sapiens | MEOX1          | ENSG00000005102 | Homeobox | ENSP00000321684;  | 4222      |
| Homo_sapiens | ZNF438         | ENSG00000183621 | zf-C2H2  | ENSP00000406934;  | 220929    |
| Homo_sapiens | TCF4           | ENSG00000196628 | bHLH     | ENSP00000457649;  | 6925      |
| Homo_sapiens | ZBTB18         | ENSG00000179456 | ZBTB     | ENSP00000481278;  | 10472     |
| Homo_sapiens | RBPJL          | ENSG00000124232 | CSL      | ENSP00000361826;  | 11317     |
| Homo_sapiens | LYL1           | ENSG00000104903 | bHLH     | ENSP00000264824;  | 4066      |
| Homo_sapiens | BHLHE22        | ENSG00000180828 | bHLH     | ENSP00000318799;  | 27319     |
| Homo_sapiens | AC010422.6     | ENSG00000269693 | zf-C2H2  | ENSP00000473043;- |           |
| Homo_sapiens | IRF3           | ENSG00000126456 | IRF      | ENSP00000469113;  | 3661      |
| Homo_sapiens | ZNF260         | ENSG00000254004 | zf-C2H2  | ENSP00000467219;  | 339324    |
| Homo_sapiens | PROX2          | ENSG00000119608 | HPD      | ENSP00000451223;  | 283571    |
| Homo_sapiens | TP63           | ENSG00000073282 | P53      | ENSP00000389485;  | 8626      |
| Homo_sapiens | HOXA6          | ENSG00000106006 | Homeobox | ENSP00000222728;  | 3203      |
| Homo_sapiens | DMRTB1         | ENSG00000143006 | DM       | ENSP00000360500;  | 63948     |
| Homo_sapiens | CCDC169-SOHLH2 | ENSG00000250709 | bHLH     | ENSP00000421868;  | 100526761 |
| Homo_sapiens | YY2            | ENSG00000230797 | zf-C2H2  | ENSP00000389381;  | 404281    |
| Homo_sapiens | ZNF143         | ENSG00000166478 | zf-C2H2  | ENSP00000379849;  | 7702      |
| Homo_sapiens | PBRM1          | ENSG00000163939 | HMG      | ENSP00000386643;  | 55193     |
| Homo_sapiens | ZNF841         | ENSG00000197608 | zf-C2H2  | ENSP00000415453;  | 284371    |
| Homo_sapiens | ADNP           | ENSG00000101126 | Homeobox | ENSP00000495540;  | 23394     |
| Homo_sapiens | SPIB           | ENSG00000269404 | ETS      | ENSP00000391877;  | 6689      |
| Homo_sapiens | BCL11B         | ENSG00000127152 | zf-C2H2  | ENSP00000387419;  | 64919     |
| Homo_sapiens | ZNF513         | ENSG00000163795 | zf-C2H2  | ENSP00000318373;  | 130557    |
| Homo_sapiens | NEUROD6        | ENSG00000164600 | bHLH     | ENSP00000297142;  | 63974     |
| Homo_sapiens | SRF            | ENSG00000112658 | SRF      | ENSP00000265354;  | 6722      |
| Homo_sapiens | TBXT           | ENSG00000164458 | T-box    | ENSP00000355836;  | 6862      |

|              |              |                 |          |                  |        |
|--------------|--------------|-----------------|----------|------------------|--------|
| Homo_sapiens | HOXD9        | ENSG00000128709 | Homeobox | ENSP00000249499; | 3235   |
| Homo_sapiens | ZBTB47       | ENSG00000114853 | ZBTB     | ENSP00000420968; | 92999  |
| Homo_sapiens | ZNF22        | ENSG00000165512 | zf-C2H2  | ENSP00000298299; | 7570   |
| Homo_sapiens | NFXL1        | ENSG00000170448 | zf-NF-X1 | ENSP00000370949; | 152518 |
| Homo_sapiens | ZNF543       | ENSG00000178229 | zf-C2H2  | ENSP00000322545; | 125919 |
| Homo_sapiens | ZNF540       | ENSG00000171817 | zf-C2H2  | ENSP00000465503; | 163255 |
| Homo_sapiens | SOX14        | ENSG00000168875 | HMG      | ENSP00000305343; | 8403   |
| Homo_sapiens | TFAP4        | ENSG00000090447 | bHLH     | ENSP00000459390; | 7023   |
| Homo_sapiens | ASCL2        | ENSG00000183734 | bHLH     | ENSP00000332293; | 430    |
| Homo_sapiens | HEY1         | ENSG00000164683 | bHLH     | ENSP00000429705; | 23462  |
| Homo_sapiens | EBF3         | ENSG00000108001 | COE      | ENSP00000347463; | 253738 |
| Homo_sapiens | XBP1         | ENSG00000100219 | TF_bZIP  | ENSP00000216037; | 7494   |
| Homo_sapiens | ZNF562       | ENSG00000171466 | zf-C2H2  | ENSP00000464716; | 54811  |
| Homo_sapiens | PROP1        | ENSG00000175325 | Homeobox | ENSP00000311290; | 5626   |
| Homo_sapiens | CDX4         | ENSG00000131264 | Homeobox | ENSP00000362613; | 1046   |
| Homo_sapiens | SOX10        | ENSG00000100146 | HMG      | ENSP00000354130; | 6663   |
| Homo_sapiens | BORCS8-MEF2B | ENSG00000064489 | SRF      | ENSP00000390762; | 4207   |
| Homo_sapiens | ZNF211       | ENSG00000121417 | zf-C2H2  | ENSP00000240731; | 10520  |
| Homo_sapiens | ZNF266       | ENSG00000174652 | zf-C2H2  | ENSP00000466714; | 10781  |
| Homo_sapiens | ZNF580       | ENSG00000213015 | zf-C2H2  | ENSP00000446126; | 51157  |
| Homo_sapiens | OVOL3        | ENSG00000105261 | zf-C2H2  | ENSP00000487603; | 728361 |
| Homo_sapiens | ZNF391       | ENSG00000124613 | zf-C2H2  | ENSP00000419498; | 346157 |
| Homo_sapiens | ATOH1        | ENSG00000172238 | bHLH     | ENSP00000302216; | 474    |
| Homo_sapiens | ATF5         | ENSG00000169136 | TF_bZIP  | ENSP00000470633; | 22809  |
| Homo_sapiens | MYB          | ENSG00000118513 | MYB      | ENSP00000432948; | 4602   |
| Homo_sapiens | ALX3         | ENSG00000156150 | Homeobox | ENSP00000358807; | 257    |
| Homo_sapiens | SP2          | ENSG00000167182 | zf-C2H2  | ENSP00000365931; | 6668   |
| Homo_sapiens | THAP2        | ENSG00000173451 | THAP     | ENSP00000310796; | 83591  |
| Homo_sapiens | GATA2        | ENSG00000179348 | zf-GATA  | ENSP00000417074; | 2624   |
| Homo_sapiens | CDX2         | ENSG00000165556 | Homeobox | ENSP00000370408; | 1045   |
| Homo_sapiens | OLIG2        | ENSG00000205927 | bHLH     | ENSP00000371794; | 10215  |
| Homo_sapiens | SIM1         | ENSG00000112246 | bHLH     | ENSP00000358210; | 6492   |
| Homo_sapiens | ZNF445       | ENSG00000185219 | zf-C2H2  | ENSP00000413073; | 353274 |
| Homo_sapiens | YBX2         | ENSG00000006047 | CSD      | ENSP00000007699; | 51087  |
| Homo_sapiens | ZBTB10       | ENSG00000205189 | ZBTB     | ENSP00000368384; | 65986  |
| Homo_sapiens | ZIK1         | ENSG00000171649 | zf-C2H2  | ENSP00000472867; | 284307 |
| Homo_sapiens | ZNF611       | ENSG00000213020 | zf-C2H2  | ENSP00000443505; | 81856  |
| Homo_sapiens | DLX2         | ENSG00000115844 | Homeobox | ENSP00000234198; | 1746   |
| Homo_sapiens | RREB1        | ENSG00000124782 | zf-C2H2  | ENSP00000420519; | 6239   |
| Homo_sapiens | GATA1        | ENSG00000102145 | zf-GATA  | ENSP00000365853; | 2623   |
| Homo_sapiens | BHLHA15      | ENSG00000180535 | bHLH     | ENSP00000326391; | 168620 |
| Homo_sapiens | SOX21        | ENSG00000125285 | HMG      | ENSP00000366144; | 11166  |
| Homo_sapiens | MAFA         | ENSG00000182759 | TF_bZIP  | ENSP00000328364; | 389692 |
| Homo_sapiens | PITX1        | ENSG00000069011 | Homeobox | ENSP00000451199; | 5307   |
| Homo_sapiens | ZNF286B      | ENSG00000249459 | zf-C2H2  | ENSP00000461413; | 729288 |
| Homo_sapiens | TGIF2LX      | ENSG00000153779 | Homeobox | ENSP00000453704; | 90316  |
| Homo_sapiens | SATB1        | ENSG00000182568 | CUT      | ENSP00000399518; | 6304   |
| Homo_sapiens | SIM2         | ENSG00000159263 | bHLH     | ENSP00000290399; | 6493   |
| Homo_sapiens | EN1          | ENSG00000163064 | Homeobox | ENSP00000295206; | 2019   |
| Homo_sapiens | ZNF845       | ENSG00000213799 | zf-C2H2  | ENSP00000388311; | 91664  |
| Homo_sapiens | DRGX         | ENSG00000165606 | Homeobox | ENSP00000401653; | 644168 |
| Homo_sapiens | MAX          | ENSG00000125952 | bHLH     | ENSP00000452197; | 4149   |
| Homo_sapiens | ZNF696       | ENSG00000185730 | zf-C2H2  | ENSP00000427857; | 79943  |
| Homo_sapiens | ZNF521       | ENSG00000198795 | zf-C2H2  | ENSP00000463000; | 25925  |
| Homo_sapiens | ZFP62        | ENSG00000196670 | zf-C2H2  | ENSP00000423820; | 643836 |
| Homo_sapiens | GLI3         | ENSG00000106571 | zf-C2H2  | ENSP00000379258; | 2737   |
| Homo_sapiens | ZBTB8A       | ENSG00000160062 | ZBTB     | ENSP00000317561; | 653121 |
| Homo_sapiens | ZNF791       | ENSG00000173875 | zf-C2H2  | ENSP00000342974; | 163049 |

|              |            |                 |           |                   |           |
|--------------|------------|-----------------|-----------|-------------------|-----------|
| Homo_sapiens | ZFP42      | ENSG00000179059 | zf-C2H2   | ENSP00000483363;  | 132625    |
| Homo_sapiens | TGIF1      | ENSG00000177426 | Homeobox  | ENSP00000339631;  | 7050      |
| Homo_sapiens | ZNF557     | ENSG00000130544 | zf-C2H2   | ENSP00000404065;  | 79230     |
| Homo_sapiens | MEIS3      | ENSG00000105419 | Homeobox  | ENSP00000454073;  | 56917     |
| Homo_sapiens | ZNF565     | ENSG00000196357 | zf-C2H2   | ENSP00000306869;  | 147929    |
| Homo_sapiens | AC002310.5 | ENSG00000261459 | zf-C2H2   | ENSP00000454241;- |           |
| Homo_sapiens | DLX1       | ENSG00000144355 | Homeobox  | ENSP00000354478;  | 1745      |
| Homo_sapiens | OLIG1      | ENSG00000184221 | bHLH      | ENSP00000371785;  | 116448    |
| Homo_sapiens | GCFC2      | ENSG00000005436 | GCFC      | ENSP00000318690;  | 6936      |
| Homo_sapiens | ZNF124     | ENSG00000196418 | zf-C2H2   | ENSP00000440365;  | 7678      |
| Homo_sapiens | ZBTB5      | ENSG00000168795 | ZBTB      | ENSP00000307604;  | 9925      |
| Homo_sapiens | ZNF554     | ENSG00000172006 | zf-C2H2   | ENSP00000321132;  | 115196    |
| Homo_sapiens | ZBTB38     | ENSG00000177311 | ZBTB      | ENSP00000406955;  | 253461    |
| Homo_sapiens | ZNF600     | ENSG00000189190 | zf-C2H2   | ENSP00000344791;  | 162966    |
| Homo_sapiens | BSX        | ENSG00000188909 | Homeobox  | ENSP00000344285;  | 390259    |
| Homo_sapiens | BHLHE41    | ENSG00000123095 | bHLH      | ENSP00000242728;  | 79365     |
| Homo_sapiens | ZSCAN23    | ENSG00000187987 | zf-C2H2   | ENSP00000289788;  | 222696    |
| Homo_sapiens | HOXA1      | ENSG00000105991 | Homeobox  | ENSP00000494260;  | 3198      |
| Homo_sapiens | MLX        | ENSG00000108788 | bHLH      | ENSP00000464697;  | 6945      |
| Homo_sapiens | TSC22D1    | ENSG00000102804 | TSC22     | ENSP00000481585;  | 8848      |
| Homo_sapiens | EGR4       | ENSG00000135625 | zf-C2H2   | ENSP00000445626;  | 1961      |
| Homo_sapiens | DUXA       | ENSG00000258873 | Homeobox  | ENSP00000452398;  | 503835    |
| Homo_sapiens | ZNF493     | ENSG00000196268 | zf-C2H2   | ENSP00000376110;  | 284443    |
| Homo_sapiens | CREBZF     | ENSG00000137504 | TF_bZIP   | ENSP00000434281;  | 58487     |
| Homo_sapiens | PAX1       | ENSG00000125813 | PAX       | ENSP00000481334;  | 5075      |
| Homo_sapiens | THAP11     | ENSG00000168286 | THAP      | ENSP00000304689;  | 57215     |
| Homo_sapiens | ARID4A     | ENSG00000032219 | ARID      | ENSP00000344556;  | 5926      |
| Homo_sapiens | ZSCAN22    | ENSG00000182318 | zf-C2H2   | ENSP00000332433;  | 342945    |
| Homo_sapiens | ZNF729     | ENSG00000196350 | zf-C2H2   | ENSP00000469582;  | 100287226 |
| Homo_sapiens | ZNF221     | ENSG00000159905 | zf-C2H2   | ENSP00000467367;  | 7638      |
| Homo_sapiens | FOXN1      | ENSG00000109101 | Fork_head | ENSP00000464645;  | 8456      |
| Homo_sapiens | MSGN1      | ENSG00000151379 | bHLH      | ENSP00000281047;  | 343930    |
| Homo_sapiens | OTX2       | ENSG00000165588 | TF_Otx    | ENSP00000451272;  | 5015      |
| Homo_sapiens | TCF7L1     | ENSG00000152284 | HMG       | ENSP00000282111;  | 83439     |
| Homo_sapiens | THAP6      | ENSG00000174796 | THAP      | ENSP00000422402;  | 152815    |
| Homo_sapiens | IRF2       | ENSG00000168310 | IRF       | ENSP00000425037;  | 3660      |
| Homo_sapiens | TFAP2D     | ENSG00000008197 | AP-2      | ENSP00000008391;  | 83741     |
| Homo_sapiens | ZNF239     | ENSG00000196793 | zf-C2H2   | ENSP00000363569;  | 8187      |
| Homo_sapiens | EBF1       | ENSG00000164330 | COE       | ENSP00000477809;  | 1879      |
| Homo_sapiens | GBX1       | ENSG00000164900 | Homeobox  | ENSP00000297537;  | 2636      |
| Homo_sapiens | REST       | ENSG00000084093 | zf-C2H2   | ENSP00000311816;  | 5978      |
| Homo_sapiens | CSDE1      | ENSG00000009307 | CSD       | ENSP00000261443;  | 7812      |
| Homo_sapiens | ZNF641     | ENSG00000167528 | zf-C2H2   | ENSP00000437832;  | 121274    |
| Homo_sapiens | ZNF90      | ENSG00000213988 | zf-C2H2   | ENSP00000410466;  | 7643      |
| Homo_sapiens | FOXN3      | ENSG00000053254 | Fork_head | ENSP00000451135;  | 1112      |
| Homo_sapiens | ZNF385A    | ENSG00000161642 | zf-C2H2   | ENSP00000338927;  | 25946     |
| Homo_sapiens | ZNF727     | ENSG00000214652 | zf-C2H2   | ENSP00000485448;  | 442319    |
| Homo_sapiens | ZNF257     | ENSG00000197134 | zf-C2H2   | ENSP00000470209;  | 113835    |
| Homo_sapiens | C11orf95   | ENSG00000188070 | zf-BED    | ENSP00000482180;  | 65998     |
| Homo_sapiens | ZNF98      | ENSG00000197360 | zf-C2H2   | ENSP00000350418;  | 148198    |
| Homo_sapiens | PPARD      | ENSG00000112033 | THR-like  | ENSP00000353916;  | 5467      |
| Homo_sapiens | ZNF223     | ENSG00000178386 | zf-C2H2   | ENSP00000467647;  | 7766      |
| Homo_sapiens | ZNF561     | ENSG00000171469 | zf-C2H2   | ENSP00000393074;  | 93134     |
| Homo_sapiens | CDX1       | ENSG00000113722 | Homeobox  | ENSP00000477928;  | 1044      |
| Homo_sapiens | ZBTB3      | ENSG00000185670 | ZBTB      | ENSP00000378286;  | 79842     |
| Homo_sapiens | TADA2B     | ENSG00000173011 | MYB       | ENSP00000308022;  | 93624     |
| Homo_sapiens | LHX2       | ENSG00000106689 | Homeobox  | ENSP00000394978;  | 9355      |
| Homo_sapiens | AC005324.4 | ENSG00000255104 | zf-C2H2   | ENSP00000458062;- |           |

|              |         |                 |           |                  |           |
|--------------|---------|-----------------|-----------|------------------|-----------|
| Homo_sapiens | MEIS2   | ENSG00000134138 | Homeobox  | ENSP00000453793; | 4212      |
| Homo_sapiens | MLXIPL  | ENSG00000009950 | bHLH      | ENSP00000392636; | 51085     |
| Homo_sapiens | ZNF274  | ENSG00000171606 | zf-C2H2   | ENSP00000484810; | 10782     |
| Homo_sapiens | HOXB2   | ENSG00000173917 | Homeobox  | ENSP00000331741; | 3212      |
| Homo_sapiens | ZNF816  | ENSG00000180257 | zf-C2H2   | ENSP00000350295; | 125893    |
| Homo_sapiens | GTF3A   | ENSG00000122034 | zf-C2H2   | ENSP00000389655; | 2971      |
| Homo_sapiens | NKX2-4  | ENSG00000125816 | Homeobox  | ENSP00000345147; | 644524    |
| Homo_sapiens | ZNF134  | ENSG00000213762 | zf-C2H2   | ENSP00000379464; | 7693      |
| Homo_sapiens | ETV2    | ENSG00000105672 | ETS       | ENSP00000368312; | 2116      |
| Homo_sapiens | POU2F1  | ENSG00000143190 | Pou       | ENSP00000414660; | 5451      |
| Homo_sapiens | SALL1   | ENSG00000103449 | zf-C2H2   | ENSP00000251020; | 6299      |
| Homo_sapiens | ZNF136  | ENSG00000196646 | zf-C2H2   | ENSP00000344162; | 7695      |
| Homo_sapiens | SP140L  | ENSG00000185404 | SAND      | ENSP00000397911; | 93349     |
| Homo_sapiens | ZNF780B | ENSG00000128000 | zf-C2H2   | ENSP00000221355; | 163131    |
| Homo_sapiens | IRF5    | ENSG00000128604 | IRF       | ENSP00000419950; | 3663      |
| Homo_sapiens | ZNF443  | ENSG00000180855 | zf-C2H2   | ENSP00000301547; | 10224     |
| Homo_sapiens | ETV1    | ENSG00000006468 | ETS       | ENSP00000385686; | 2115      |
| Homo_sapiens | HMG20B  | ENSG00000064961 | HMG       | ENSP00000328269; | 10362     |
| Homo_sapiens | PGR     | ENSG00000082175 | ESR-like  | ENSP00000481227; | 5241      |
| Homo_sapiens | MYBL2   | ENSG00000101057 | MYB       | ENSP00000380072; | 4605      |
| Homo_sapiens | EGR2    | ENSG00000122877 | zf-C2H2   | ENSP00000242480; | 1959      |
| Homo_sapiens | ZNF397  | ENSG00000186812 | zf-C2H2   | ENSP00000331577; | 84307     |
| Homo_sapiens | NFATC2  | ENSG00000101096 | RHD       | ENSP00000396471; | 4773      |
| Homo_sapiens | OTX1    | ENSG00000115507 | TF_Otx    | ENSP00000355631; | 5013      |
| Homo_sapiens | CREM    | ENSG00000095794 | TF_bZIP   | ENSP00000417807; | 1390      |
| Homo_sapiens | FOXO3   | ENSG00000118689 | Fork_head | ENSP00000339527; | 2309      |
| Homo_sapiens | ZBTB6   | ENSG00000186130 | ZBTB      | ENSP00000362763; | 10773     |
| Homo_sapiens | ZNF433  | ENSG00000197647 | zf-C2H2   | ENSP00000448099; | 163059    |
| Homo_sapiens | CREB1   | ENSG00000118260 | TF_bZIP   | ENSP00000236995; | 1385      |
| Homo_sapiens | POU3F4  | ENSG00000196767 | Pou       | ENSP00000495996; | 5456      |
| Homo_sapiens | ZNF672  | ENSG00000171161 | zf-C2H2   | ENSP00000426199; | 79894     |
| Homo_sapiens | ZNF329  | ENSG00000181894 | zf-C2H2   | ENSP00000470008; | 79673     |
| Homo_sapiens | SCRT1   | ENSG00000261678 | zf-C2H2   | ENSP00000455711; | 83482     |
| Homo_sapiens | ZNF140  | ENSG00000196387 | zf-C2H2   | ENSP00000445411; | 7699      |
| Homo_sapiens | ZBED6   | ENSG00000257315 | zf-BED    | ENSP00000447879; | 100381270 |
| Homo_sapiens | ZNF765  | ENSG00000196417 | zf-C2H2   | ENSP00000379689; | 91661     |
| Homo_sapiens | CRX     | ENSG00000105392 | TF_Otx    | ENSP00000221996; | 1406      |
| Homo_sapiens | ZNF853  | ENSG00000236609 | zf-C2H2   | ENSP00000455585; | 54753     |
| Homo_sapiens | BAZ2B   | ENSG00000123636 | MBD       | ENSP00000339670; | 29994     |
| Homo_sapiens | ZNF182  | ENSG00000147118 | zf-C2H2   | ENSP00000366142; | 7569      |
| Homo_sapiens | ZNF467  | ENSG00000181444 | zf-C2H2   | ENSP00000304769; | 168544    |
| Homo_sapiens | ZNF253  | ENSG00000256771 | zf-C2H2   | ENSP00000467235; | 56242     |
| Homo_sapiens | PRDM10  | ENSG00000170325 | zf-C2H2   | ENSP00000432237; | 56980     |
| Homo_sapiens | ZNF333  | ENSG00000160961 | zf-C2H2   | ENSP00000292530; | 84449     |
| Homo_sapiens | PRDM1   | ENSG00000057657 | zf-C2H2   | ENSP00000358092; | 639       |
| Homo_sapiens | ZIM3    | ENSG00000141946 | zf-C2H2   | ENSP00000269834; | 114026    |
| Homo_sapiens | GATA4   | ENSG00000136574 | zf-GATA   | ENSP00000435043; | 2626      |
| Homo_sapiens | GLIS2   | ENSG00000126603 | zf-C2H2   | ENSP00000395547; | 84662     |
| Homo_sapiens | ZNF180  | ENSG00000167384 | zf-C2H2   | ENSP00000221327; | 7733      |
| Homo_sapiens | ZNF366  | ENSG00000178175 | zf-C2H2   | ENSP00000313158; | 167465    |
| Homo_sapiens | SOX18   | ENSG00000203883 | HMG       | ENSP00000341815; | 54345     |
| Homo_sapiens | ZFP1    | ENSG00000184517 | zf-C2H2   | ENSP00000377080; | 162239    |
| Homo_sapiens | ZNF517  | ENSG00000197363 | zf-C2H2   | ENSP00000432025; | 340385    |
| Homo_sapiens | HOXD10  | ENSG00000128710 | Homeobox  | ENSP00000249501; | 3236      |
| Homo_sapiens | ZNF112  | ENSG00000062370 | zf-C2H2   | ENSP00000337081; | 7771      |
| Homo_sapiens | CCDC88A | ENSG00000115355 | TF_bZIP   | ENSP00000480931; | 55704     |
| Homo_sapiens | ZNF628  | ENSG00000197483 | zf-C2H2   | ENSP00000469591; | 89887     |
| Homo_sapiens | ZNF829  | ENSG00000185869 | zf-C2H2   | ENSP00000429266; | 374899    |

|              |        |                 |           |                  |        |
|--------------|--------|-----------------|-----------|------------------|--------|
| Homo_sapiens | TADA2A | ENSG00000276234 | MYB       | ENSP00000484884; | 6871   |
| Homo_sapiens | ASCL3  | ENSG00000176009 | bHLH      | ENSP00000435770; | 56676  |
| Homo_sapiens | ZNF688 | ENSG00000229809 | zf-C2H2   | ENSP00000223459; | 146542 |
| Homo_sapiens | ZNF784 | ENSG00000179922 | zf-C2H2   | ENSP00000320096; | 147808 |
| Homo_sapiens | MYOD1  | ENSG00000129152 | bHLH      | ENSP00000250003; | 4654   |
| Homo_sapiens | SMAD5  | ENSG00000113658 | MH1       | ENSP00000422954; | 4090   |
| Homo_sapiens | GSX1   | ENSG00000169840 | Homeobox  | ENSP00000304331; | 219409 |
| Homo_sapiens | DMBX1  | ENSG00000197587 | Homeobox  | ENSP00000361024; | 127343 |
| Homo_sapiens | ZNF419 | ENSG00000105136 | zf-C2H2   | ENSP00000390916; | 79744  |
| Homo_sapiens | SP110  | ENSG00000135899 | SAND      | ENSP00000375902; | 3431   |
| Homo_sapiens | SALL3  | ENSG00000256463 | zf-C2H2   | ENSP00000461451; | 27164  |
| Homo_sapiens | BBX    | ENSG00000114439 | HMG       | ENSP00000385530; | 56987  |
| Homo_sapiens | FEZF2  | ENSG00000153266 | zf-C2H2   | ENSP00000418804; | 55079  |
| Homo_sapiens | EBF2   | ENSG00000221818 | COE       | ENSP00000386178; | 64641  |
| Homo_sapiens | HMGA2  | ENSG00000149948 | HMGA      | ENSP00000346658; | 8091   |
| Homo_sapiens | DACH1  | ENSG00000276644 | DACH      | ENSP00000482245; | 1602   |
| Homo_sapiens | SETDB1 | ENSG00000143379 | MBD       | ENSP00000432348; | 9869   |
| Homo_sapiens | VAX2   | ENSG00000116035 | Homeobox  | ENSP00000405114; | 25806  |
| Homo_sapiens | MEF2D  | ENSG00000116604 | SRF       | ENSP00000477413; | 4209   |
| Homo_sapiens | ZNF273 | ENSG00000198039 | zf-C2H2   | ENSP00000418719; | 10793  |
| Homo_sapiens | ZNF287 | ENSG00000141040 | zf-C2H2   | ENSP00000379168; | 57336  |
| Homo_sapiens | ZNF37A | ENSG00000075407 | zf-C2H2   | ENSP00000329141; | 7587   |
| Homo_sapiens | RAX    | ENSG00000134438 | Homeobox  | ENSP00000334813; | 30062  |
| Homo_sapiens | OSR2   | ENSG00000164920 | zf-C2H2   | ENSP00000429910; | 116039 |
| Homo_sapiens | ZNF763 | ENSG00000197054 | zf-C2H2   | ENSP00000402017; | 284390 |
| Homo_sapiens | TSHZ3  | ENSG00000121297 | zf-C2H2   | ENSP00000240587; | 57616  |
| Homo_sapiens | ZNF555 | ENSG00000186300 | zf-C2H2   | ENSP00000467893; | 148254 |
| Homo_sapiens | HOXC10 | ENSG00000180818 | Homeobox  | ENSP00000307321; | 3226   |
| Homo_sapiens | TOX    | ENSG00000198846 | HMG       | ENSP00000354842; | 9760   |
| Homo_sapiens | KLF8   | ENSG00000102349 | zf-C2H2   | ENSP00000417303; | 11279  |
| Homo_sapiens | ZNF235 | ENSG00000159917 | zf-C2H2   | ENSP00000291182; | 9310   |
| Homo_sapiens | ZNF746 | ENSG00000181220 | zf-C2H2   | ENSP00000395007; | 155061 |
| Homo_sapiens | VAX1   | ENSG00000148704 | Homeobox  | ENSP00000277905; | 11023  |
| Homo_sapiens | BARX2  | ENSG00000043039 | Homeobox  | ENSP00000281437; | 8538   |
| Homo_sapiens | ZNF311 | ENSG00000197935 | zf-C2H2   | ENSP00000366384; | 282890 |
| Homo_sapiens | RBPJ   | ENSG00000168214 | CSL       | ENSP00000423703; | 3516   |
| Homo_sapiens | PDX1   | ENSG00000139515 | Homeobox  | ENSP00000370421; | 3651   |
| Homo_sapiens | ZXDB   | ENSG00000198455 | zf-C2H2   | ENSP00000364023; | 158586 |
| Homo_sapiens | ZNF528 | ENSG00000167555 | zf-C2H2   | ENSP00000353652; | 84436  |
| Homo_sapiens | BATF3  | ENSG00000123685 | TF_bZIP   | ENSP00000243440; | 55509  |
| Homo_sapiens | HOXC12 | ENSG00000123407 | Homeobox  | ENSP00000243103; | 3228   |
| Homo_sapiens | SMAD1  | ENSG00000170365 | MH1       | ENSP00000426568; | 4086   |
| Homo_sapiens | ZFP91  | ENSG00000186660 | zf-C2H2   | ENSP00000339030; | 80829  |
| Homo_sapiens | HMX2   | ENSG00000188816 | Homeobox  | ENSP00000341108; | 3167   |
| Homo_sapiens | ZNF416 | ENSG00000083817 | zf-C2H2   | ENSP00000196489; | 55659  |
| Homo_sapiens | ZNF776 | ENSG00000152443 | zf-C2H2   | ENSP00000321812; | 284309 |
| Homo_sapiens | SPDEF  | ENSG00000124664 | ETS       | ENSP00000363149; | 25803  |
| Homo_sapiens | ARID3C | ENSG00000205143 | ARID      | ENSP00000368189; | 138715 |
| Homo_sapiens | ZNF417 | ENSG00000173480 | zf-C2H2   | ENSP00000472272; | 147687 |
| Homo_sapiens | FOXO1  | ENSG00000150907 | Fork_head | ENSP00000368880; | 2308   |
| Homo_sapiens | ZNF709 | ENSG00000242852 | zf-C2H2   | ENSP00000380840; | 163051 |
| Homo_sapiens | FOXH1  | ENSG00000160973 | Fork_head | ENSP00000366534; | 8928   |
| Homo_sapiens | ZNF80  | ENSG00000174255 | zf-C2H2   | ENSP00000417192; | 7634   |
| Homo_sapiens | ZNF296 | ENSG00000170684 | zf-C2H2   | ENSP00000302770; | 162979 |
| Homo_sapiens | ZFX    | ENSG00000005889 | zf-C2H2   | ENSP00000438233; | 7543   |
| Homo_sapiens | SP4    | ENSG00000105866 | zf-C2H2   | ENSP00000222584; | 6671   |
| Homo_sapiens | ID1    | ENSG00000125968 | bHLH      | ENSP00000365280; | 3397   |
| Homo_sapiens | ZNF701 | ENSG00000167562 | zf-C2H2   | ENSP00000301093; | 55762  |

|              |           |                 |           |                  |        |
|--------------|-----------|-----------------|-----------|------------------|--------|
| Homo_sapiens | CEBPB     | ENSG00000172216 | TF_bZIP   | ENSP00000305422; | 1051   |
| Homo_sapiens | ZNF66     | ENSG00000160229 | zf-C2H2   | ENSP00000461425; | 7617   |
| Homo_sapiens | TULP2     | ENSG00000104804 | Tub       | ENSP00000429131; | 7288   |
| Homo_sapiens | RFX1      | ENSG00000132005 | RFX       | ENSP00000254325; | 5989   |
| Homo_sapiens | ZNF724    | ENSG00000196081 | zf-C2H2   | ENSP00000413411; | 440519 |
| Homo_sapiens | GRHL2     | ENSG00000083307 | CP2       | ENSP00000379260; | 79977  |
| Homo_sapiens | ZNF879    | ENSG00000234284 | zf-C2H2   | ENSP00000414887; | 345462 |
| Homo_sapiens | TEAD3     | ENSG00000007866 | TEA       | ENSP00000345772; | 7005   |
| Homo_sapiens | ZNF541    | ENSG00000118156 | zf-C2H2   | ENSP00000313258; | 84215  |
| Homo_sapiens | ZNF610    | ENSG00000167554 | zf-C2H2   | ENSP00000324441; | 162963 |
| Homo_sapiens | ELK4      | ENSG00000158711 | ETS       | ENSP00000289703; | 2005   |
| Homo_sapiens | TERF1     | ENSG00000147601 | MYB       | ENSP00000276603; | 7013   |
| Homo_sapiens | RXRG      | ENSG00000143171 | RXR-like  | ENSP00000482458; | 6258   |
| Homo_sapiens | USF2      | ENSG00000105698 | bHLH      | ENSP00000368429; | 7392   |
| Homo_sapiens | ZNF35     | ENSG00000169981 | zf-C2H2   | ENSP00000379368; | 7584   |
| Homo_sapiens | FOXO4     | ENSG00000184481 | Fork_head | ENSP00000363377; | 4303   |
| Homo_sapiens | RFX2      | ENSG00000087903 | RFX       | ENSP00000306335; | 5990   |
| Homo_sapiens | CTCFL     | ENSG00000124092 | zf-C2H2   | ENSP00000243914; | 140690 |
| Homo_sapiens | AFF1      | ENSG00000172493 | AF-4      | ENSP00000425755; | 4299   |
| Homo_sapiens | ZNF775    | ENSG00000196456 | zf-C2H2   | ENSP00000417483; | 285971 |
| Homo_sapiens | ELF2      | ENSG00000109381 | ETS       | ENSP00000377782; | 1998   |
| Homo_sapiens | ZNF32     | ENSG00000169740 | zf-C2H2   | ENSP00000363556; | 7580   |
| Homo_sapiens | LHX5      | ENSG00000089116 | Homeobox  | ENSP00000261731; | 64211  |
| Homo_sapiens | SOHLH1    | ENSG00000165643 | bHLH      | ENSP00000298466; | 402381 |
| Homo_sapiens | NSD2      | ENSG00000109685 | HMG       | ENSP00000372348; | 7468   |
| Homo_sapiens | HMGB4     | ENSG00000176256 | HMG       | ENSP00000429214; | 127540 |
| Homo_sapiens | ZBTB44    | ENSG00000196323 | ZBTB      | ENSP00000433457; | 29068  |
| Homo_sapiens | ZNF444    | ENSG00000167685 | zf-C2H2   | ENSP00000468069; | 55311  |
| Homo_sapiens | NKX2-5    | ENSG00000183072 | Homeobox  | ENSP00000327758; | 1482   |
| Homo_sapiens | ARID5B    | ENSG00000150347 | ARID      | ENSP00000308862; | 84159  |
| Homo_sapiens | JDP2      | ENSG00000140044 | TF_bZIP   | ENSP00000399587; | 122953 |
| Homo_sapiens | FOS       | ENSG00000170345 | TF_bZIP   | ENSP00000451786; | 2353   |
| Homo_sapiens | BARX1     | ENSG00000131668 | Homeobox  | ENSP00000253968; | 56033  |
| Homo_sapiens | LIN28B    | ENSG00000187772 | CSD       | ENSP00000489735; | 389421 |
| Homo_sapiens | LHX3      | ENSG00000107187 | Homeobox  | ENSP00000483080; | 8022   |
| Homo_sapiens | NRF1      | ENSG00000106459 | Nrf1      | ENSP00000376924; | 4899   |
| Homo_sapiens | HOXC13    | ENSG00000123364 | Homeobox  | ENSP00000243056; | 3229   |
| Homo_sapiens | FOXS1     | ENSG00000179772 | Fork_head | ENSP00000365145; | 2307   |
| Homo_sapiens | DMTF1     | ENSG00000135164 | MYB       | ENSP00000463638; | 9988   |
| Homo_sapiens | ISL1      | ENSG0000016082  | Homeobox  | ENSP00000230658; | 3670   |
| Homo_sapiens | STAT3     | ENSG00000168610 | STAT      | ENSP00000373923; | 6774   |
| Homo_sapiens | ETV6      | ENSG00000139083 | ETS       | ENSP00000379658; | 2120   |
| Homo_sapiens | IRX3      | ENSG00000177508 | Homeobox  | ENSP00000331608; | 79191  |
| Homo_sapiens | ZNF627    | ENSG00000198551 | zf-C2H2   | ENSP00000354414; | 199692 |
| Homo_sapiens | ZKSCAN5   | ENSG00000196652 | zf-C2H2   | ENSP00000377725; | 23660  |
| Homo_sapiens | NFATC4    | ENSG00000100968 | RHD       | ENSP00000451284; | 4776   |
| Homo_sapiens | ZNF212    | ENSG00000170260 | zf-C2H2   | ENSP00000338572; | 7988   |
| Homo_sapiens | KLF5      | ENSG00000102554 | zf-C2H2   | ENSP00000366915; | 688    |
| Homo_sapiens | ZNF572    | ENSG00000180938 | zf-C2H2   | ENSP00000319305; | 137209 |
| Homo_sapiens | HES1      | ENSG00000114315 | bHLH      | ENSP00000232424; | 3280   |
| Homo_sapiens | ZNF343    | ENSG00000088876 | zf-C2H2   | ENSP00000278772; | 79175  |
| Homo_sapiens | ZNF91     | ENSG00000167232 | zf-C2H2   | ENSP00000300619; | 7644   |
| Homo_sapiens | THAP7     | ENSG00000184436 | THAP      | ENSP00000382084; | 80764  |
| Homo_sapiens | GTF2IRD2B | ENSG00000174428 | GTF2I     | ENSP00000480524; | 389524 |
| Homo_sapiens | ONECUT1   | ENSG00000169856 | CUT       | ENSP00000476168; | 3175   |
| Homo_sapiens | ZNF79     | ENSG00000196152 | zf-C2H2   | ENSP00000438418; | 7633   |
| Homo_sapiens | ZSCAN5C   | ENSG00000204532 | zf-C2H2   | ENSP00000435234; | 649137 |
| Homo_sapiens | TRERF1    | ENSG00000124496 | zf-C2H2   | ENSP00000346285; | 55809  |



|              |            |                 |           |                   |           |
|--------------|------------|-----------------|-----------|-------------------|-----------|
| Homo_sapiens | BATF       | ENSG00000156127 | TF_bZIP   | ENSP00000450486;  | 10538     |
| Homo_sapiens | LHX9       | ENSG00000143355 | Homeobox  | ENSP00000356360;  | 56956     |
| Homo_sapiens | TOX4       | ENSG00000092203 | HMG       | ENSP00000393080;  | 9878      |
| Homo_sapiens | REL        | ENSG00000162924 | RHD       | ENSP00000496299;  | 5966      |
| Homo_sapiens | HOXD11     | ENSG00000128713 | Homeobox  | ENSP00000249504;  | 3237      |
| Homo_sapiens | ZBTB34     | ENSG00000177125 | ZBTB      | ENSP00000362551;  | 403341    |
| Homo_sapiens | ATF6B      | ENSG00000213676 | TF_bZIP   | ENSP00000364349;  | 1388      |
| Homo_sapiens | FOXD4L6    | ENSG00000273514 | Fork_head | ENSP00000484875;  | 653404    |
| Homo_sapiens | ELK3       | ENSG00000111145 | ETS       | ENSP00000447857;  | 2004      |
| Homo_sapiens | ZNF559     | ENSG00000188321 | zf-C2H2   | ENSP00000468153;  | 84527     |
| Homo_sapiens | GSC2       | ENSG00000063515 | Homeobox  | ENSP00000086933;  | 2928      |
| Homo_sapiens | ONECUT3    | ENSG00000205922 | CUT       | ENSP00000371786;  | 390874    |
| Homo_sapiens | ARNT       | ENSG00000143437 | bHLH      | ENSP00000346372;  | 405       |
| Homo_sapiens | ETV4       | ENSG00000175832 | ETS       | ENSP00000465718;  | 2118      |
| Homo_sapiens | ZNF792     | ENSG00000180884 | zf-C2H2   | ENSP00000385099;  | 126375    |
| Homo_sapiens | IRF1       | ENSG00000125347 | IRF       | ENSP00000480887;  | 3659      |
| Homo_sapiens | NFATC3     | ENSG00000072736 | RHD       | ENSP00000456120;  | 4775      |
| Homo_sapiens | PAX2       | ENSG00000075891 | PAX       | ENSP00000396259;  | 5076      |
| Homo_sapiens | ZNF222     | ENSG00000159885 | zf-C2H2   | ENSP00000187879;  | 7673      |
| Homo_sapiens | KLF4       | ENSG00000136826 | zf-C2H2   | ENSP00000363804;  | 9314      |
| Homo_sapiens | TSC22D3    | ENSG00000157514 | TSC22     | ENSP00000361466;  | 1831      |
| Homo_sapiens | ZNF229     | ENSG00000278318 | zf-C2H2   | ENSP00000479884;  | 7772      |
| Homo_sapiens | TFEC       | ENSG00000105967 | bHLH      | ENSP00000318676;  | 22797     |
| Homo_sapiens | ZNF668     | ENSG00000167394 | zf-C2H2   | ENSP00000440149;  | 79759     |
| Homo_sapiens | HOXD1      | ENSG00000128645 | Homeobox  | ENSP00000328598;  | 3231      |
| Homo_sapiens | ASCL1      | ENSG00000139352 | bHLH      | ENSP00000266744;  | 429       |
| Homo_sapiens | RCOR3      | ENSG00000117625 | MYB       | ENSP00000355972;  | 55758     |
| Homo_sapiens | ZNF790     | ENSG00000197863 | zf-C2H2   | ENSP00000480834;  | 388536    |
| Homo_sapiens | ZNF605     | ENSG00000196458 | zf-C2H2   | ENSP00000353314;  | 100289635 |
| Homo_sapiens | POU4F3     | ENSG00000091010 | Pou       | ENSP00000230732;  | 5459      |
| Homo_sapiens | ESRRA      | ENSG00000173153 | ESR-like  | ENSP00000441970;  | 2101      |
| Homo_sapiens | GLIS3      | ENSG00000107249 | zf-C2H2   | ENSP00000371398;  | 169792    |
| Homo_sapiens | ZNF519     | ENSG00000175322 | zf-C2H2   | ENSP00000464872;  | 162655    |
| Homo_sapiens | ZNF354A    | ENSG00000169131 | zf-C2H2   | ENSP00000337122;  | 6940      |
| Homo_sapiens | ZNF214     | ENSG00000149050 | zf-C2H2   | ENSP00000445373;  | 7761      |
| Homo_sapiens | AC019117.3 | ENSG00000283321 | bHLH      | ENSP00000490530;- |           |
| Homo_sapiens | ZFAT       | ENSG00000066827 | zf-C2H2   | ENSP00000429930;  | 57623     |
| Homo_sapiens | ZKSCAN4    | ENSG00000187626 | zf-C2H2   | ENSP00000366509;  | 387032    |
| Homo_sapiens | AC008770.2 | ENSG00000267179 | zf-C2H2   | ENSP00000467286;- |           |
| Homo_sapiens | FOXA1      | ENSG00000129514 | Fork_head | ENSP00000250448;  | 3169      |
| Homo_sapiens | ZNF658     | ENSG00000274349 | zf-C2H2   | ENSP00000479295;  | 26149     |
| Homo_sapiens | PITX3      | ENSG00000107859 | Homeobox  | ENSP00000359019;  | 5309      |
| Homo_sapiens | ZNF496     | ENSG00000162714 | zf-C2H2   | ENSP00000294753;  | 84838     |
| Homo_sapiens | ZNF248     | ENSG00000198105 | zf-C2H2   | ENSP00000349882;  | 57209     |
| Homo_sapiens | KLF10      | ENSG00000155090 | zf-C2H2   | ENSP00000379222;  | 7071      |
| Homo_sapiens | BCL6       | ENSG00000113916 | ZBTB      | ENSP00000413122;  | 604       |
| Homo_sapiens | HKR1       | ENSG00000181666 | zf-C2H2   | ENSP00000438261;  | 284459    |
| Homo_sapiens | TCF7L2     | ENSG00000148737 | HMG       | ENSP00000435694;  | 6934      |
| Homo_sapiens | MAEL       | ENSG00000143194 | HMG       | ENSP00000356846;  | 84944     |
| Homo_sapiens | NR1H4      | ENSG00000012504 | THR-like  | ENSP00000315442;  | 9971      |
| Homo_sapiens | POU5F1B    | ENSG00000212993 | Pou       | ENSP00000495779;  | 5462      |
| Homo_sapiens | ZNF316     | ENSG00000205903 | zf-C2H2   | ENSP00000477706;  | 100131017 |
| Homo_sapiens | POU2F2     | ENSG0000028277  | Pou       | ENSP00000452930;  | 5452      |
| Homo_sapiens | ZNF432     | ENSG00000256087 | zf-C2H2   | ENSP00000221315;  | 9668      |
| Homo_sapiens | HSF5       | ENSG00000176160 | HSF       | ENSP00000313243;  | 124535    |
| Homo_sapiens | ZNF382     | ENSG00000161298 | zf-C2H2   | ENSP00000389722;  | 84911     |
| Homo_sapiens | ZNF507     | ENSG00000168813 | zf-C2H2   | ENSP00000441549;  | 22847     |
| Homo_sapiens | MYCL       | ENSG00000116990 | bHLH      | ENSP00000380494;  | 4610      |

|              |          |                 |           |                  |           |
|--------------|----------|-----------------|-----------|------------------|-----------|
| Homo_sapiens | SNAIL1   | ENSG00000124216 | zf-C2H2   | ENSP00000244050; | 6615      |
| Homo_sapiens | NKX6-3   | ENSG00000165066 | Homeobox  | ENSP00000428361; | 157848    |
| Homo_sapiens | SREBF2   | ENSG00000198911 | bHLH      | ENSP00000395728; | 6721      |
| Homo_sapiens | ZNF347   | ENSG00000197937 | zf-C2H2   | ENSP00000471712; | 84671     |
| Homo_sapiens | ZNF281   | ENSG00000162702 | zf-C2H2   | ENSP00000294740; | 23528     |
| Homo_sapiens | BNC2     | ENSG00000173068 | zf-C2H2   | ENSP00000370047; | 54796     |
| Homo_sapiens | HOXA10   | ENSG00000253293 | Homeobox  | ENSP00000379633; | 3206      |
| Homo_sapiens | SOX4     | ENSG00000124766 | HMG       | ENSP00000244745; | 6659      |
| Homo_sapiens | SPI1     | ENSG00000066336 | ETS       | ENSP00000227163; | 6688      |
| Homo_sapiens | ZFP90    | ENSG00000184939 | zf-C2H2   | ENSP00000460547; | 146198    |
| Homo_sapiens | ZNF23    | ENSG00000167377 | zf-C2H2   | ENSP00000377171; | 7571      |
| Homo_sapiens | SOX11    | ENSG00000176887 | HMG       | ENSP00000322568; | 6664      |
| Homo_sapiens | MIS18BP1 | ENSG00000129534 | MYB       | ENSP00000309790; | 55320     |
| Homo_sapiens | HLX      | ENSG00000136630 | Homeobox  | ENSP00000408248; | 3142      |
| Homo_sapiens | ZNF85    | ENSG00000105750 | zf-C2H2   | ENSP00000471588; | 7639      |
| Homo_sapiens | ZNF799   | ENSG00000196466 | zf-C2H2   | ENSP00000415278; | 90576     |
| Homo_sapiens | MEF2C    | ENSG00000081189 | SRF       | ENSP00000422390; | 4208      |
| Homo_sapiens | PRDM16   | ENSG00000142611 | zf-C2H2   | ENSP00000426975; | 63976     |
| Homo_sapiens | ZNF408   | ENSG00000175213 | zf-C2H2   | ENSP00000309606; | 79797     |
| Homo_sapiens | ZNF200   | ENSG00000010539 | zf-C2H2   | ENSP00000395723; | 7752      |
| Homo_sapiens | ZNF883   | ENSG00000285447 | zf-C2H2   | ENSP00000490059; | 169834    |
| Homo_sapiens | ZNF526   | ENSG00000167625 | zf-C2H2   | ENSP00000301215; | 116115    |
| Homo_sapiens | DBP      | ENSG00000105516 | TF_bZIP   | ENSP00000469426; | 1628      |
| Homo_sapiens | ZNF473   | ENSG00000142528 | zf-C2H2   | ENSP00000375697; | 25888     |
| Homo_sapiens | ZNF551   | ENSG00000204519 | zf-C2H2   | ENSP00000472674; | 90233     |
| Homo_sapiens | IKZF2    | ENSG00000030419 | zf-C2H2   | ENSP00000342876; | 22807     |
| Homo_sapiens | E4F1     | ENSG00000167967 | zf-C2H2   | ENSP00000301727; | 1877      |
| Homo_sapiens | OTP      | ENSG00000171540 | Homeobox  | ENSP00000302814; | 23440     |
| Homo_sapiens | ZNF800   | ENSG00000048405 | zf-C2H2   | ENSP00000376989; | 168850    |
| Homo_sapiens | FERD3L   | ENSG00000146618 | bHLH      | ENSP00000275461; | 222894    |
| Homo_sapiens | ZNF865   | ENSG00000261221 | zf-C2H2   | ENSP00000457715; | 100507290 |
| Homo_sapiens | ZNF707   | ENSG00000181135 | zf-C2H2   | ENSP00000436212; | 101928160 |
| Homo_sapiens | ZNF606   | ENSG00000166704 | zf-C2H2   | ENSP00000343617; | 80095     |
| Homo_sapiens | SOX8     | ENSG00000005513 | HMG       | ENSP00000293894; | 30812     |
| Homo_sapiens | GCM1     | ENSG00000137270 | GCM       | ENSP00000259803; | 8521      |
| Homo_sapiens | BCL6B    | ENSG00000161940 | ZBTB      | ENSP00000445010; | 255877    |
| Homo_sapiens | HEYL     | ENSG00000163909 | bHLH      | ENSP00000361943; | 26508     |
| Homo_sapiens | SALL4    | ENSG00000101115 | zf-C2H2   | ENSP00000379319; | 57167     |
| Homo_sapiens | ZNF18    | ENSG00000154957 | zf-C2H2   | ENSP00000462383; | 7566      |
| Homo_sapiens | ZSCAN5B  | ENSG00000197213 | zf-C2H2   | ENSP00000466072; | 342933    |
| Homo_sapiens | MTA1     | ENSG00000182979 | zf-GATA   | ENSP00000394106; | 9112      |
| Homo_sapiens | NR6A1    | ENSG00000148200 | GCMF-like | ENSP00000420587; | 2649      |
| Homo_sapiens | JUN      | ENSG00000177606 | TF_bZIP   | ENSP00000360266; | 3725      |
| Homo_sapiens | ZNF141   | ENSG00000131127 | zf-C2H2   | ENSP00000240499; | 7700      |
| Homo_sapiens | NFX1     | ENSG00000086102 | zf-NF-X1  | ENSP00000368856; | 4799      |
| Homo_sapiens | ARX      | ENSG00000004848 | Homeobox  | ENSP00000368332; | 170302    |
| Homo_sapiens | PEG3     | ENSG00000198300 | zf-C2H2   | ENSP00000326581; | 5178      |
| Homo_sapiens | RARB     | ENSG00000077092 | THR-like  | ENSP00000332296; | 5915      |
| Homo_sapiens | NCOR2    | ENSG00000196498 | MYB       | ENSP00000405367; | 9612      |
| Homo_sapiens | UBTFL1   | ENSG00000255009 | HMG       | ENSP00000485108; | 642623    |
| Homo_sapiens | ZNF331   | ENSG00000130844 | zf-C2H2   | ENSP00000393817; | 55422     |
| Homo_sapiens | ZNF778   | ENSG00000170100 | zf-C2H2   | ENSP00000305203; | 197320    |
| Homo_sapiens | NRL      | ENSG00000129535 | TF_bZIP   | ENSP00000380193; | 4901      |
| Homo_sapiens | MYOG     | ENSG00000122180 | bHLH      | ENSP00000241651; | 4656      |
| Homo_sapiens | NOTO     | ENSG00000214513 | Homeobox  | ENSP00000381486; | 344022    |
| Homo_sapiens | ZNF205   | ENSG00000122386 | zf-C2H2   | ENSP00000371627; | 7755      |
| Homo_sapiens | LEF1     | ENSG00000138795 | HMG       | ENSP00000369284; | 51176     |
| Homo_sapiens | ZNF529   | ENSG00000186020 | zf-C2H2   | ENSP00000465578; | 57711     |

|              |         |                 |           |                  |           |
|--------------|---------|-----------------|-----------|------------------|-----------|
| Homo_sapiens | HOXA2   | ENSG00000105996 | Homeobox  | ENSP00000222718; | 3199      |
| Homo_sapiens | ZNF148  | ENSG00000163848 | zf-C2H2   | ENSP00000420448; | 7707      |
| Homo_sapiens | SMARCC1 | ENSG00000173473 | MYB       | ENSP00000254480; | 6599      |
| Homo_sapiens | ZNF322  | ENSG00000181315 | zf-C2H2   | ENSP00000478899; | 79692     |
| Homo_sapiens | TAL2    | ENSG00000186051 | bHLH      | ENSP00000334547; | 6887      |
| Homo_sapiens | EMX2    | ENSG00000170370 | Homeobox  | ENSP00000450962; | 2018      |
| Homo_sapiens | KLF2    | ENSG00000127528 | zf-C2H2   | ENSP00000248071; | 10365     |
| Homo_sapiens | ZBTB22  | ENSG00000236104 | ZBTB      | ENSP00000407545; | 9278      |
| Homo_sapiens | ZNF550  | ENSG00000251369 | zf-C2H2   | ENSP00000422344; | 162972    |
| Homo_sapiens | ZFP3    | ENSG00000180787 | zf-C2H2   | ENSP00000320347; | 124961    |
| Homo_sapiens | ZNF597  | ENSG00000167981 | zf-C2H2   | ENSP00000301744; | 146434    |
| Homo_sapiens | PBX4    | ENSG00000105717 | Homeobox  | ENSP00000251203; | 80714     |
| Homo_sapiens | ZNF652  | ENSG00000198740 | zf-C2H2   | ENSP00000354686; | 22834     |
| Homo_sapiens | CSDC2   | ENSG00000172346 | CSD       | ENSP00000417127; | 27254     |
| Homo_sapiens | TPRX1   | ENSG00000178928 | Homeobox  | ENSP00000438832; | 284355    |
| Homo_sapiens | ZFH3    | ENSG00000140836 | Homeobox  | ENSP00000493252; | 463       |
| Homo_sapiens | ZNF358  | ENSG00000198816 | zf-C2H2   | ENSP00000472777; | 140467    |
| Homo_sapiens | FOXD1   | ENSG00000251493 | Fork_head | ENSP00000481581; | 2297      |
| Homo_sapiens | STAT2   | ENSG00000170581 | STAT      | ENSP00000315768; | 6773      |
| Homo_sapiens | ZNF431  | ENSG00000196705 | zf-C2H2   | ENSP00000308578; | 170959    |
| Homo_sapiens | SREBF1  | ENSG00000072310 | bHLH      | ENSP00000411516; | 6720      |
| Homo_sapiens | ZNF69   | ENSG00000198429 | zf-C2H2   | ENSP00000402985; | 7620      |
| Homo_sapiens | FOXB2   | ENSG00000204612 | Fork_head | ENSP00000365898; | 442425    |
| Homo_sapiens | MIER1   | ENSG00000198160 | MYB       | ENSP00000360053; | 57708     |
| Homo_sapiens | LRRFIP2 | ENSG00000093167 | LRRFIP    | ENSP00000338727; | 9209      |
| Homo_sapiens | GATA6   | ENSG00000141448 | zf-GATA   | ENSP00000269216; | 2627      |
| Homo_sapiens | HIVEP2  | ENSG0000010818  | zf-C2H2   | ENSP00000356576; | 3097      |
| Homo_sapiens | ZNF100  | ENSG00000197020 | zf-C2H2   | ENSP00000445201; | 163227    |
| Homo_sapiens | SOHLH2  | ENSG00000120669 | bHLH      | ENSP00000369210; | 54937     |
| Homo_sapiens | ZKSCAN8 | ENSG00000198315 | zf-C2H2   | ENSP00000402948; | 7745      |
| Homo_sapiens | HOXC9   | ENSG00000180806 | Homeobox  | ENSP00000423861; | 3225      |
| Homo_sapiens | SP9     | ENSG00000217236 | zf-C2H2   | ENSP00000378418; | 100131390 |
| Homo_sapiens | ZNF684  | ENSG00000117010 | zf-C2H2   | ENSP00000361784; | 127396    |
| Homo_sapiens | ZNF484  | ENSG00000127081 | zf-C2H2   | ENSP00000364646; | 83744     |
| Homo_sapiens | ZNF570  | ENSG00000171827 | zf-C2H2   | ENSP00000331540; | 148268    |
| Homo_sapiens | ZNF251  | ENSG00000198169 | zf-C2H2   | ENSP00000292562; | 90987     |
| Homo_sapiens | NR1H3   | ENSG0000025434  | THR-like  | ENSP00000384745; | 10062     |
| Homo_sapiens | ZIC3    | ENSG00000156925 | zf-C2H2   | ENSP00000359638; | 7547      |
| Homo_sapiens | FEV     | ENSG00000163497 | ETS       | ENSP00000295727; | 54738     |
| Homo_sapiens | NFYB    | ENSG00000120837 | NF-YB     | ENSP00000448250; | 4801      |
| Homo_sapiens | ZNF677  | ENSG00000197928 | zf-C2H2   | ENSP00000334394; | 342926    |
| Homo_sapiens | HOPX    | ENSG00000171476 | Homeobox  | ENSP00000396275; | 84525     |
| Homo_sapiens | ZNF460  | ENSG00000197714 | zf-C2H2   | ENSP00000446167; | 10794     |
| Homo_sapiens | ARID3B  | ENSG00000179361 | ARID      | ENSP00000455668; | 10620     |
| Homo_sapiens | ZNF581  | ENSG00000171425 | zf-C2H2   | ENSP00000466564; | 51545     |
| Homo_sapiens | GLMP    | ENSG00000198715 | NCU-G1    | ENSP00000483691; | 112770    |
| Homo_sapiens | ZNF649  | ENSG00000198093 | zf-C2H2   | ENSP00000347043; | 65251     |
| Homo_sapiens | NKX1-1  | ENSG00000235608 | Homeobox  | ENSP00000407978; | 54729     |
| Homo_sapiens | ZNF469  | ENSG00000225614 | zf-C2H2   | ENSP00000402343; | 84627     |
| Homo_sapiens | VEZF1   | ENSG00000136451 | zf-C2H2   | ENSP00000462337; | 7716      |
| Homo_sapiens | ZNF518A | ENSG00000177853 | zf-C2H2   | ENSP00000480280; | 9849      |
| Homo_sapiens | TFDP1   | ENSG00000198176 | E2F       | ENSP00000364519; | 7027      |
| Homo_sapiens | RELA    | ENSG00000173039 | RHD       | ENSP00000436545; | 5970      |
| Homo_sapiens | CREB3L3 | ENSG00000060566 | TF_bZIP   | ENSP00000469355; | 84699     |
| Homo_sapiens | GZF1    | ENSG00000125812 | ZBTB      | ENSP00000366250; | 64412     |
| Homo_sapiens | ZNF19   | ENSG00000157429 | zf-C2H2   | ENSP00000462810; | 7567      |
| Homo_sapiens | SAMD11  | ENSG00000187634 | SAND      | ENSP00000411579; | 148398    |
| Homo_sapiens | RUNX2   | ENSG00000124813 | Runt      | ENSP00000496517; | 860       |

|              |         |                 |           |                  |           |
|--------------|---------|-----------------|-----------|------------------|-----------|
| Homo_sapiens | HSF2    | ENSG00000025156 | HSF       | ENSP00000357440; | 3298      |
| Homo_sapiens | CARHSP1 | ENSG00000153048 | CSD       | ENSP00000478055; | 23589     |
| Homo_sapiens | TFCP2L1 | ENSG00000115112 | CP2       | ENSP00000263707; | 29842     |
| Homo_sapiens | TSHZ1   | ENSG00000179981 | zf-C2H2   | ENSP00000464391; | 10194     |
| Homo_sapiens | ZNF234  | ENSG00000263002 | zf-C2H2   | ENSP00000465011; | 10780     |
| Homo_sapiens | ZNF43   | ENSG00000198521 | zf-C2H2   | ENSP00000350085; | 7594      |
| Homo_sapiens | HIF3A   | ENSG00000124440 | bHLH      | ENSP00000432809; | 64344     |
| Homo_sapiens | FOXE3   | ENSG00000186790 | Fork_head | ENSP00000334472; | 2301      |
| Homo_sapiens | POU5F2  | ENSG00000248483 | Pou       | ENSP00000489796; | 134187    |
| Homo_sapiens | NOBOX   | ENSG00000106410 | Homeobox  | ENSP00000496732; | 135935    |
| Homo_sapiens | FOXR2   | ENSG00000189299 | Fork_head | ENSP00000427329; | 139628    |
| Homo_sapiens | ID4     | ENSG00000172201 | bHLH      | ENSP00000367972; | 3400      |
| Homo_sapiens | ZNF93   | ENSG00000184635 | zf-C2H2   | ENSP00000467553; | 81931     |
| Homo_sapiens | PTF1A   | ENSG00000168267 | bHLH      | ENSP00000365687; | 256297    |
| Homo_sapiens | ZNF625  | ENSG00000257591 | zf-C2H2   | ENSP00000394380; | 90589     |
| Homo_sapiens | PAX6    | ENSG00000007372 | PAX       | ENSP00000492316; | 5080      |
| Homo_sapiens | ZNF267  | ENSG00000185947 | zf-C2H2   | ENSP00000300870; | 10308     |
| Homo_sapiens | PAX7    | ENSG00000009709 | PAX       | ENSP00000383502; | 5081      |
| Homo_sapiens | BHLHE23 | ENSG00000125533 | bHLH      | ENSP00000480998; | 128408    |
| Homo_sapiens | GRHL3   | ENSG00000158055 | CP2       | ENSP00000348333; | 57822     |
| Homo_sapiens | ZNF512  | ENSG00000243943 | zf-C2H2   | ENSP00000347648; | 84450     |
| Homo_sapiens | ZFP2    | ENSG00000198939 | zf-C2H2   | ENSP00000430531; | 80108     |
| Homo_sapiens | ZNF787  | ENSG00000142409 | zf-C2H2   | ENSP00000478557; | 126208    |
| Homo_sapiens | GMEB1   | ENSG00000162419 | SAND      | ENSP00000355186; | 10691     |
| Homo_sapiens | ZNF700  | ENSG00000196757 | zf-C2H2   | ENSP00000479449; | 90592     |
| Homo_sapiens | SIX5    | ENSG00000177045 | Homeobox  | ENSP00000494267; | 147912    |
| Homo_sapiens | HOXD8   | ENSG00000175879 | Homeobox  | ENSP00000406045; | 3234      |
| Homo_sapiens | EBF4    | ENSG00000088881 | COE       | ENSP00000345030; | 57593     |
| Homo_sapiens | ZNF692  | ENSG00000171163 | zf-C2H2   | ENSP00000305483; | 55657     |
| Homo_sapiens | MYT1    | ENSG00000196132 | zf-C2HC   | ENSP00000353269; | 4661      |
| Homo_sapiens | CPHXL   | ENSG00000283755 | Homeobox  | ENSP00000491599; | 105371346 |
| Homo_sapiens | ZNF615  | ENSG00000197619 | zf-C2H2   | ENSP00000365906; | 284370    |
| Homo_sapiens | NR2F1   | ENSG00000175745 | RXR-like  | ENSP00000481517; | 7025      |
| Homo_sapiens | IRF7    | ENSG00000185507 | IRF       | ENSP00000433903; | 3665      |
| Homo_sapiens | ZNF117  | ENSG00000152926 | zf-C2H2   | ENSP00000479944; | 109504726 |
| Homo_sapiens | ZNF579  | ENSG00000218891 | zf-C2H2   | ENSP00000320188; | 163033    |
| Homo_sapiens | ZNF556  | ENSG00000172000 | zf-C2H2   | ENSP00000467366; | 80032     |
| Homo_sapiens | ZNF777  | ENSG00000196453 | zf-C2H2   | ENSP00000247930; | 27153     |
| Homo_sapiens | FOXE1   | ENSG00000178919 | Fork_head | ENSP00000364265; | 2304      |
| Homo_sapiens | ZNF680  | ENSG00000173041 | zf-C2H2   | ENSP00000309330; | 340252    |
| Homo_sapiens | ZIC4    | ENSG00000174963 | zf-C2H2   | ENSP00000417855; | 84107     |
| Homo_sapiens | NFYC    | ENSG00000066136 | NF-YC     | ENSP00000436710; | 4802      |
| Homo_sapiens | PRDM15  | ENSG00000141956 | zf-C2H2   | ENSP00000408592; | 63977     |
| Homo_sapiens | ZNF468  | ENSG00000204604 | zf-C2H2   | ENSP00000375660; | 162967    |
| Homo_sapiens | ID2     | ENSG00000115738 | bHLH      | ENSP00000385465; | 3398      |
| Homo_sapiens | ZSCAN5A | ENSG00000131848 | zf-C2H2   | ENSP00000466445; | 79149     |
| Homo_sapiens | ISL2    | ENSG00000159556 | Homeobox  | ENSP00000290759; | 64843     |
| Homo_sapiens | ZNF710  | ENSG00000140548 | zf-C2H2   | ENSP00000268154; | 374655    |
| Homo_sapiens | ZIC5    | ENSG00000139800 | zf-C2H2   | ENSP00000267294; | 85416     |
| Homo_sapiens | ZBED4   | ENSG00000100426 | zf-BED    | ENSP00000216268; | 9889      |
| Homo_sapiens | ZNF679  | ENSG00000197123 | zf-C2H2   | ENSP00000416809; | 168417    |
| Homo_sapiens | HMBBOX1 | ENSG00000147421 | Homeobox  | ENSP00000380516; | 79618     |
| Homo_sapiens | RFX5    | ENSG00000143390 | RFX       | ENSP00000376502; | 5993      |
| Homo_sapiens | ZNF687  | ENSG00000143373 | zf-C2H2   | ENSP00000398821; | 57592     |
| Homo_sapiens | ZNF773  | ENSG00000152439 | zf-C2H2   | ENSP00000282292; | 374928    |
| Homo_sapiens | HOXB7   | ENSG00000260027 | Homeobox  | ENSP00000239165; | 3217      |
| Homo_sapiens | ZNF470  | ENSG00000197016 | zf-C2H2   | ENSP00000333223; | 388566    |
| Homo_sapiens | HHEX    | ENSG00000152804 | Homeobox  | ENSP00000450017; | 3087      |

|              |            |                 |            |                   |           |
|--------------|------------|-----------------|------------|-------------------|-----------|
| Homo_sapiens | ANHX       | ENSG00000227059 | Homeobox   | ENSP00000439513;  | 647589    |
| Homo_sapiens | L3MBTL1    | ENSG00000185513 | zf-C2HC    | ENSP00000402107;  | 26013     |
| Homo_sapiens | ASCL4      | ENSG00000187855 | bHLH       | ENSP00000345420;  | 121549    |
| Homo_sapiens | ZNF480     | ENSG00000198464 | zf-C2H2    | ENSP00000334164;  | 147657    |
| Homo_sapiens | FOXI3      | ENSG00000214336 | Fork_head  | ENSP00000478384;  | 344167    |
| Homo_sapiens | ZFP57      | ENSG00000204644 | zf-C2H2    | ENSP00000366078;  | 346171    |
| Homo_sapiens | RFX8       | ENSG00000196460 | RFX        | ENSP00000494216;  | 731220    |
| Homo_sapiens | GLI4       | ENSG00000250571 | zf-C2H2    | ENSP00000430987;  | 2738      |
| Homo_sapiens | MBD3       | ENSG00000071655 | MBD        | ENSP00000412302;  | 53615     |
| Homo_sapiens | ZNF732     | ENSG00000186777 | zf-C2H2    | ENSP00000478210;  | 654254    |
| Homo_sapiens | TCF12      | ENSG00000140262 | bHLH       | ENSP00000444696;  | 6938      |
| Homo_sapiens | ELK1       | ENSG00000126767 | ETS        | ENSP00000345585;  | 2002      |
| Homo_sapiens | DBX1       | ENSG00000109851 | Homeobox   | ENSP00000436881;  | 120237    |
| Homo_sapiens | GFI1       | ENSG00000162676 | zf-C2H2    | ENSP00000399719;  | 2672      |
| Homo_sapiens | ZNF726     | ENSG00000213967 | zf-C2H2    | ENSP00000471516;  | 730087    |
| Homo_sapiens | SIX3       | ENSG00000138083 | Homeobox   | ENSP00000260653;  | 6496      |
| Homo_sapiens | ZSCAN12    | ENSG00000158691 | zf-C2H2    | ENSP00000380039;  | 9753      |
| Homo_sapiens | BATF2      | ENSG00000168062 | TF_bZIP    | ENSP00000301887;  | 116071    |
| Homo_sapiens | NR5A2      | ENSG00000116833 | SF-like    | ENSP00000236914;  | 2494      |
| Homo_sapiens | ZEB2       | ENSG00000169554 | zf-C2H2    | ENSP00000454157;  | 9839      |
| Homo_sapiens | GTF2I      | ENSG00000263001 | GTF2I      | ENSP00000477837;  | 2969      |
| Homo_sapiens | ZNF568     | ENSG00000198453 | zf-C2H2    | ENSP00000466901;  | 374900    |
| Homo_sapiens | ZNF217     | ENSG00000171940 | zf-C2H2    | ENSP00000360526;  | 7764      |
| Homo_sapiens | CDC5L      | ENSG00000096401 | MYB        | ENSP00000360532;  | 988       |
| Homo_sapiens | TSC22D2    | ENSG00000196428 | TSC22      | ENSP00000354543;  | 9819      |
| Homo_sapiens | PIAS3      | ENSG00000131788 | zf-MIZ     | ENSP00000358304;  | 10401     |
| Homo_sapiens | IRX5       | ENSG00000176842 | Homeobox   | ENSP00000378132;  | 10265     |
| Homo_sapiens | ERF        | ENSG00000105722 | ETS        | ENSP00000388173;  | 2077      |
| Homo_sapiens | ZFP37      | ENSG00000136866 | zf-C2H2    | ENSP00000452552;  | 7539      |
| Homo_sapiens | ETV3       | ENSG00000117036 | ETS        | ENSP00000357175;  | 2117      |
| Homo_sapiens | TFE3       | ENSG00000068323 | bHLH       | ENSP00000314129;  | 7030      |
| Homo_sapiens | CTCF       | ENSG00000102974 | zf-C2H2    | ENSP00000495218;  | 10664     |
| Homo_sapiens | EGR1       | ENSG00000120738 | zf-C2H2    | ENSP00000239938;  | 1958      |
| Homo_sapiens | TFDP3      | ENSG00000183434 | E2F        | ENSP00000385461;  | 51270     |
| Homo_sapiens | E2F2       | ENSG00000007968 | E2F        | ENSP00000355249;  | 1870      |
| Homo_sapiens | ZFP36L2    | ENSG00000152518 | zf-CCCH    | ENSP00000282388;  | 678       |
| Homo_sapiens | NFIC       | ENSG00000141905 | CTF/NFI    | ENSP00000342194;  | 4782      |
| Homo_sapiens | LCOR       | ENSG00000196233 | HTH        | ENSP00000348298;  | 84458     |
| Homo_sapiens | ZNF614     | ENSG00000142556 | zf-C2H2    | ENSP00000270649;  | 80110     |
| Homo_sapiens | RFX7       | ENSG00000181827 | RFX        | ENSP00000453376;  | 64864     |
| Homo_sapiens | ZBTB7A     | ENSG00000178951 | ZBTB       | ENSP00000471865;  | 51341     |
| Homo_sapiens | ZNF717     | ENSG00000227124 | zf-C2H2    | ENSP00000419377;  | 100131827 |
| Homo_sapiens | ZNF34      | ENSG00000196378 | zf-C2H2    | ENSP00000434049;  | 80778     |
| Homo_sapiens | NR4A2      | ENSG00000153234 | NGFIB-like | ENSP00000386747;  | 4929      |
| Homo_sapiens | MEF2A      | ENSG00000068305 | SRF        | ENSP00000452989;  | 4205      |
| Homo_sapiens | ZNF367     | ENSG00000165244 | zf-C2H2    | ENSP00000364405;  | 195828    |
| Homo_sapiens | RCOR1      | ENSG00000089902 | MYB        | ENSP00000262241;  | 23186     |
| Homo_sapiens | ZNF264     | ENSG00000083844 | zf-C2H2    | ENSP00000263095;  | 9422      |
| Homo_sapiens | ZNF441     | ENSG00000197044 | zf-C2H2    | ENSP00000350576;  | 126068    |
| Homo_sapiens | TWIST1     | ENSG00000122691 | bHLH       | ENSP00000242261;  | 7291      |
| Homo_sapiens | AFF4       | ENSG00000072364 | AF-4       | ENSP00000265343;  | 27125     |
| Homo_sapiens | STAT5A     | ENSG00000126561 | STAT       | ENSP00000465437;  | 6776      |
| Homo_sapiens | ZNF888     | ENSG00000213793 | zf-C2H2    | ENSP00000491567;  | 388559    |
| Homo_sapiens | AC023509.3 | ENSG00000267281 | TF_bZIP    | ENSP00000466174;- |           |
| Homo_sapiens | ZNF805     | ENSG00000204524 | zf-C2H2    | ENSP00000412999;  | 390980    |
| Homo_sapiens | ZHX3       | ENSG00000174306 | Homeobox   | ENSP00000443783;  | 23051     |
| Homo_sapiens | ZNF584     | ENSG00000171574 | zf-C2H2    | ENSP00000471105;  | 201514    |
| Homo_sapiens | PRRX1      | ENSG00000116132 | Homeobox   | ENSP00000450762;  | 5396      |

|              |            |                 |           |                   |        |
|--------------|------------|-----------------|-----------|-------------------|--------|
| Homo_sapiens | HOXA3      | ENSG00000105997 | Homeobox  | ENSP00000379640;  | 3200   |
| Homo_sapiens | E2F5       | ENSG00000133740 | E2F       | ENSP00000398124;  | 1875   |
| Homo_sapiens | KLF17      | ENSG00000171872 | zf-C2H2   | ENSP00000361373;  | 128209 |
| Homo_sapiens | RHOXF1     | ENSG00000101883 | Homeobox  | ENSP00000217999;  | 158800 |
| Homo_sapiens | NKX2-3     | ENSG00000119919 | Homeobox  | ENSP00000479692;  | 159296 |
| Homo_sapiens | ZNF691     | ENSG00000164011 | zf-C2H2   | ENSP00000361585;  | 51058  |
| Homo_sapiens | ZSCAN31    | ENSG00000235109 | zf-C2H2   | ENSP00000391235;  | 64288  |
| Homo_sapiens | ZNF337     | ENSG00000130684 | zf-C2H2   | ENSP00000252979;  | 26152  |
| Homo_sapiens | ZNF429     | ENSG00000197013 | zf-C2H2   | ENSP00000351280;  | 353088 |
| Homo_sapiens | YY1        | ENSG00000100811 | zf-C2H2   | ENSP00000262238;  | 7528   |
| Homo_sapiens | ZNF76      | ENSG00000065029 | zf-C2H2   | ENSP00000419106;  | 7629   |
| Homo_sapiens | AC020909.1 | ENSG00000142539 | ETS       | ENSP00000473233;- |        |
| Homo_sapiens | ZSCAN2     | ENSG00000176371 | zf-C2H2   | ENSP00000351257;  | 54993  |
| Homo_sapiens | ZNF12      | ENSG00000164631 | zf-C2H2   | ENSP00000384405;  | 7559   |
| Homo_sapiens | DNAJC1     | ENSG00000136770 | MYB       | ENSP00000366179;  | 64215  |
| Homo_sapiens | ZNF585A    | ENSG00000196967 | zf-C2H2   | ENSP00000375998;  | 199704 |
| Homo_sapiens | ZNF385B    | ENSG00000144331 | zf-C2H2   | ENSP00000386845;  | 151126 |
| Homo_sapiens | FOXA2      | ENSG00000125798 | Fork_head | ENSP00000366319;  | 3170   |
| Homo_sapiens | ZSCAN9     | ENSG00000137185 | zf-C2H2   | ENSP00000252207;  | 7746   |
| Homo_sapiens | ZNF814     | ENSG00000204514 | zf-C2H2   | ENSP00000480123;  | 730051 |
| Homo_sapiens | ZNF697     | ENSG00000143067 | zf-C2H2   | ENSP00000396857;  | 90874  |
| Homo_sapiens | ZNF462     | ENSG00000148143 | zf-C2H2   | ENSP00000405837;  | 58499  |
| Homo_sapiens | ZNF618     | ENSG00000157657 | zf-C2H2   | ENSP00000363241;  | 114991 |
| Homo_sapiens | CREB3L2    | ENSG00000182158 | TF_bZIP   | ENSP00000329140;  | 64764  |
| Homo_sapiens | ZNF827     | ENSG00000151612 | zf-C2H2   | ENSP00000423130;  | 152485 |
| Homo_sapiens | ZNF77      | ENSG00000175691 | zf-C2H2   | ENSP00000319053;  | 58492  |
| Homo_sapiens | NEUROG2    | ENSG00000178403 | bHLH      | ENSP00000317333;  | 63973  |
| Homo_sapiens | MSC        | ENSG00000178860 | bHLH      | ENSP00000321445;  | 9242   |
| Homo_sapiens | NEUROD1    | ENSG00000162992 | bHLH      | ENSP00000295108;  | 4760   |
| Homo_sapiens | ZBTB12     | ENSG00000204366 | ZBTB      | ENSP00000364677;  | 221527 |
| Homo_sapiens | ZNF629     | ENSG00000102870 | zf-C2H2   | ENSP00000262525;  | 23361  |
| Homo_sapiens | ATOH7      | ENSG00000179774 | bHLH      | ENSP00000362777;  | 220202 |
| Homo_sapiens | KLF7       | ENSG00000118263 | zf-C2H2   | ENSP00000387510;  | 8609   |
| Homo_sapiens | ZBTB48     | ENSG00000204859 | ZBTB      | ENSP00000466390;  | 3104   |
| Homo_sapiens | MESP2      | ENSG00000188095 | bHLH      | ENSP00000342392;  | 145873 |
| Homo_sapiens | FOKK1      | ENSG00000164916 | Fork_head | ENSP00000328720;  | 221937 |
| Homo_sapiens | ZBTB41     | ENSG00000177888 | ZBTB      | ENSP00000356375;  | 360023 |
| Homo_sapiens | NR2C2      | ENSG00000177463 | RXR-like  | ENSP00000388387;  | 7182   |
| Homo_sapiens | ZNF558     | ENSG00000167785 | zf-C2H2   | ENSP00000301475;  | 148156 |
| Homo_sapiens | RFX4       | ENSG00000111783 | RFX       | ENSP00000444163;  | 5992   |
| Homo_sapiens | SMARCC2    | ENSG00000139613 | MYB       | ENSP00000449396;  | 6601   |
| Homo_sapiens | PLAGL1     | ENSG00000118495 | zf-C2H2   | ENSP00000356544;  | 5325   |
| Homo_sapiens | ZBTB7B     | ENSG00000160685 | ZBTB      | ENSP00000438647;  | 51043  |
| Homo_sapiens | ZNF425     | ENSG00000204947 | zf-C2H2   | ENSP00000367300;  | 155054 |
| Homo_sapiens | HOXB4      | ENSG00000182742 | Homeobox  | ENSP00000328928;  | 3214   |
| Homo_sapiens | ZNF500     | ENSG00000103199 | zf-C2H2   | ENSP00000464747;  | 26048  |
| Homo_sapiens | FOXL2      | ENSG00000183770 | Fork_head | ENSP00000333188;  | 668    |
| Homo_sapiens | PHOX2B     | ENSG00000109132 | Homeobox  | ENSP00000226382;  | 8929   |
| Homo_sapiens | ISX        | ENSG00000175329 | Homeobox  | ENSP00000386037;  | 91464  |
| Homo_sapiens | ZBTB21     | ENSG00000173276 | ZBTB      | ENSP00000381512;  | 49854  |
| Homo_sapiens | ZNF582     | ENSG00000018869 | zf-C2H2   | ENSP00000483414;  | 147948 |
| Homo_sapiens | SP100      | ENSG00000067066 | SAND      | ENSP00000343023;  | 6672   |
| Homo_sapiens | ZSCAN21    | ENSG00000166529 | zf-C2H2   | ENSP00000292450;  | 7589   |
| Homo_sapiens | STAT6      | ENSG00000166888 | STAT      | ENSP00000438451;  | 6778   |
| Homo_sapiens | FOXC2      | ENSG00000176692 | Fork_head | ENSP00000326371;  | 2303   |
| Homo_sapiens | TCF3       | ENSG00000071564 | bHLH      | ENSP00000467508;  | 6929   |
| Homo_sapiens | LHX1       | ENSG00000273706 | Homeobox  | ENSP00000477829;  | 3975   |
| Homo_sapiens | ID3        | ENSG00000117318 | bHLH      | ENSP00000363689;  | 3399   |

|              |         |                 |           |                  |           |
|--------------|---------|-----------------|-----------|------------------|-----------|
| Homo_sapiens | ARID5A  | ENSG00000196843 | ARID      | ENSP00000350078; | 10865     |
| Homo_sapiens | PAX3    | ENSG00000135903 | PAX       | ENSP00000386750; | 5077      |
| Homo_sapiens | DEAF1   | ENSG00000177030 | SAND      | ENSP00000371846; | 10522     |
| Homo_sapiens | ZNF44   | ENSG00000197857 | zf-C2H2   | ENSP00000377008; | 51710     |
| Homo_sapiens | KLF1    | ENSG00000105610 | zf-C2H2   | ENSP00000264834; | 10661     |
| Homo_sapiens | GATAD2B | ENSG00000143614 | zf-GATA   | ENSP00000489595; | 57459     |
| Homo_sapiens | SIX1    | ENSG00000126778 | Homeobox  | ENSP00000494686; | 6495      |
| Homo_sapiens | ONECUT2 | ENSG00000119547 | CUT       | ENSP00000419185; | 9480      |
| Homo_sapiens | ZFY     | ENSG00000067646 | zf-C2H2   | ENSP00000372525; | 7544      |
| Homo_sapiens | ATMIN   | ENSG00000166454 | zf-C2H2   | ENSP00000464427; | 23300     |
| Homo_sapiens | NFIA    | ENSG00000162599 | CTF/NFI   | ENSP00000360233; | 4774      |
| Homo_sapiens | FOXI2   | ENSG00000186766 | Fork_head | ENSP00000373572; | 399823    |
| Homo_sapiens | TFCP2   | ENSG00000135457 | CP2       | ENSP00000449280; | 7024      |
| Homo_sapiens | MBD4    | ENSG00000129071 | MBD       | ENSP00000394080; | 8930      |
| Homo_sapiens | ZIC1    | ENSG00000152977 | zf-C2H2   | ENSP00000419664; | 7545      |
| Homo_sapiens | POU6F1  | ENSG00000184271 | Pou       | ENSP00000330190; | 5463      |
| Homo_sapiens | FIGLA   | ENSG00000183733 | bHLH      | ENSP00000333097; | 344018    |
| Homo_sapiens | TFAP2E  | ENSG00000116819 | AP-2      | ENSP00000362332; | 339488    |
| Homo_sapiens | ZNF213  | ENSG00000085644 | zf-C2H2   | ENSP00000380087; | 7760      |
| Homo_sapiens | ZNF17   | ENSG00000186272 | zf-C2H2   | ENSP00000302455; | 7565      |
| Homo_sapiens | HAND1   | ENSG00000113196 | bHLH      | ENSP00000231121; | 9421      |
| Homo_sapiens | HSFX1   | ENSG00000171116 | HSF       | ENSP00000359444; | 100506164 |
| Homo_sapiens | FOXC1   | ENSG00000054598 | Fork_head | ENSP00000493906; | 2296      |
| Homo_sapiens | PAX9    | ENSG00000198807 | PAX       | ENSP00000355245; | 5083      |
| Homo_sapiens | ZNF28   | ENSG00000198538 | zf-C2H2   | ENSP00000375661; | 7576      |
| Homo_sapiens | MNT     | ENSG00000070444 | bHLH      | ENSP00000174618; | 4335      |
| Homo_sapiens | NEUROD2 | ENSG00000171532 | bHLH      | ENSP00000306754; | 4761      |
| Homo_sapiens | ZNF133  | ENSG00000125846 | zf-C2H2   | ENSP00000346090; | 7692      |
| Homo_sapiens | BNC1    | ENSG00000169594 | zf-C2H2   | ENSP00000456727; | 646       |
| Homo_sapiens | PRDM9   | ENSG00000164256 | zf-C2H2   | ENSP00000296682; | 56979     |
| Homo_sapiens | HNF1A   | ENSG00000135100 | Homeobox  | ENSP00000443112; | 6927      |
| Homo_sapiens | ZNF653  | ENSG00000161914 | zf-C2H2   | ENSP00000293771; | 115950    |
| Homo_sapiens | UNCX    | ENSG00000164853 | Homeobox  | ENSP00000314480; | 340260    |
| Homo_sapiens | TGIF2   | ENSG00000118707 | Homeobox  | ENSP00000362979; | 60436     |
| Homo_sapiens | ZSCAN32 | ENSG00000140987 | zf-C2H2   | ENSP00000483210; | 54925     |
| Homo_sapiens | ZFHX4   | ENSG00000091656 | Homeobox  | ENSP00000430848; | 79776     |
| Homo_sapiens | ZFP69   | ENSG00000187815 | zf-C2H2   | ENSP00000361791; | 339559    |
| Homo_sapiens | ETV7    | ENSG00000010030 | ETS       | ENSP00000484485; | 51513     |
| Homo_sapiens | TLX1    | ENSG00000107807 | Homeobox  | ENSP00000359215; | 3195      |
| Homo_sapiens | ZNF747  | ENSG00000169955 | zf-C2H2   | ENSP00000457274; | 65988     |
| Homo_sapiens | ATF7    | ENSG00000170653 | TF_bZIP   | ENSP00000387406; | 11016     |
| Homo_sapiens | ZNF74   | ENSG00000185252 | zf-C2H2   | ENSP00000385855; | 7625      |
| Homo_sapiens | ETV3L   | ENSG00000253831 | ETS       | ENSP00000430271; | 440695    |
| Homo_sapiens | FIZ1    | ENSG00000179943 | zf-C2H2   | ENSP00000468342; | 84922     |
| Homo_sapiens | ZNF177  | ENSG00000188629 | zf-C2H2   | ENSP00000468531; | 7730      |
| Homo_sapiens | ZKSCAN1 | ENSG00000106261 | zf-C2H2   | ENSP00000443508; | 7586      |
| Homo_sapiens | HOXA7   | ENSG00000122592 | Homeobox  | ENSP00000242159; | 3204      |
| Homo_sapiens | GATA5   | ENSG00000130700 | zf-GATA   | ENSP00000252997; | 140628    |
| Homo_sapiens | THAP3   | ENSG00000041988 | THAP      | ENSP00000311537; | 90326     |
| Homo_sapiens | TFEB    | ENSG00000112561 | bHLH      | ENSP00000412551; | 7942      |
| Homo_sapiens | SOX3    | ENSG00000134595 | HMG       | ENSP00000359567; | 6658      |
| Homo_sapiens | MYSM1   | ENSG00000162601 | MYB       | ENSP00000418734; | 114803    |
| Homo_sapiens | HEY2    | ENSG00000135547 | bHLH      | ENSP00000357349; | 23493     |
| Homo_sapiens | ZNF84   | ENSG00000198040 | zf-C2H2   | ENSP00000376133; | 7637      |
| Homo_sapiens | NCOA1   | ENSG00000084676 | bHLH      | ENSP00000288599; | 8648      |
| Homo_sapiens | SUB1    | ENSG00000113387 | PC4       | ENSP00000265073; | 10923     |
| Homo_sapiens | ZNF723  | ENSG00000268696 | zf-C2H2   | ENSP00000494306; | 646864    |
| Homo_sapiens | SOX13   | ENSG00000143842 | HMG       | ENSP00000356172; | 9580      |

|              |         |                 |          |                  |           |
|--------------|---------|-----------------|----------|------------------|-----------|
| Homo_sapiens | ZBTB37  | ENSG00000185278 | ZBTB     | ENSP00000415293; | 84614     |
| Homo_sapiens | MSX1    | ENSG00000163132 | Homeobox | ENSP00000372170; | 4487      |
| Homo_sapiens | ZNF564  | ENSG00000249709 | zf-C2H2  | ENSP00000340004; | 163050    |
| Homo_sapiens | NKX2-1  | ENSG00000136352 | Homeobox | ENSP00000346879; | 7080      |
| Homo_sapiens | ZNF292  | ENSG00000188994 | zf-C2H2  | ENSP00000342847; | 23036     |
| Homo_sapiens | ZNF749  | ENSG00000186230 | zf-C2H2  | ENSP00000333980; | 388567    |
| Homo_sapiens | LHX4    | ENSG00000121454 | Homeobox | ENSP00000263726; | 89884     |
| Homo_sapiens | HES2    | ENSG00000069812 | bHLH     | ENSP00000367065; | 54626     |
| Homo_sapiens | HLF     | ENSG00000108924 | TF_bZIP  | ENSP00000226067; | 3131      |
| Homo_sapiens | IRF9    | ENSG00000213928 | IRF      | ENSP00000453974; | 10379     |
| Homo_sapiens | PPARG   | ENSG00000132170 | THR-like | ENSP00000495840; | 5468      |
| Homo_sapiens | SHOX2   | ENSG00000168779 | Homeobox | ENSP00000419362; | 6474      |
| Homo_sapiens | ZNF277  | ENSG00000198839 | zf-C2H2  | ENSP00000354501; | 11179     |
| Homo_sapiens | ZNF878  | ENSG00000257446 | zf-C2H2  | ENSP00000447931; | 729747    |
| Homo_sapiens | ARID1B  | ENSG00000049618 | ARID     | ENSP00000344546; | 57492     |
| Homo_sapiens | ZNF426  | ENSG00000130818 | zf-C2H2  | ENSP00000468100; | 79088     |
| Homo_sapiens | DLX4    | ENSG00000108813 | Homeobox | ENSP00000240306; | 1748      |
| Homo_sapiens | ZNF33B  | ENSG00000196693 | zf-C2H2  | ENSP00000481265; | 7582      |
| Homo_sapiens | ZNF639  | ENSG00000121864 | zf-C2H2  | ENSP00000419650; | 51193     |
| Homo_sapiens | BARHL2  | ENSG00000143032 | Homeobox | ENSP00000359474; | 343472    |
| Homo_sapiens | ZNF83   | ENSG00000167766 | zf-C2H2  | ENSP00000472619; | 55769     |
| Homo_sapiens | HAND2   | ENSG00000164107 | bHLH     | ENSP00000352565; | 9464      |
| Homo_sapiens | ZBTB42  | ENSG00000179627 | ZBTB     | ENSP00000450673; | 100128927 |
| Homo_sapiens | ARNTL2  | ENSG00000029153 | bHLH     | ENSP00000379238; | 56938     |
| Homo_sapiens | ZNF320  | ENSG00000182986 | zf-C2H2  | ENSP00000473091; | 162967    |
| Homo_sapiens | ZNF10   | ENSG00000256223 | zf-C2H2  | ENSP00000248211; | 7556      |
| Homo_sapiens | TUB     | ENSG00000166402 | Tub      | ENSP00000299506; | 7275      |
| Homo_sapiens | ZNF107  | ENSG00000196247 | zf-C2H2  | ENSP00000343443; | 51427     |
| Homo_sapiens | ZFP36L1 | ENSG00000185650 | zf-CCCH  | ENSP00000388402; | 677       |
| Homo_sapiens | ZNF713  | ENSG00000178665 | zf-C2H2  | ENSP00000487818; | 349075    |
| Homo_sapiens | ARID2   | ENSG00000189079 | ARID     | ENSP00000397307; | 196528    |
| Homo_sapiens | ATF4    | ENSG00000128272 | TF_bZIP  | ENSP00000336790; | 468       |
| Homo_sapiens | KMT2C   | ENSG00000055609 | HMG      | ENSP00000347325; | 58508     |
| Homo_sapiens | ZNF783  | ENSG00000204946 | zf-C2H2  | ENSP00000410890; | 100289678 |
| Homo_sapiens | HIVEP1  | ENSG00000095951 | zf-C2H2  | ENSP00000486543; | 3096      |
| Homo_sapiens | MGA     | ENSG00000174197 | T-box    | ENSP00000219905; | 23269     |
| Homo_sapiens | ZNF560  | ENSG00000198028 | zf-C2H2  | ENSP00000301480; | 147741    |
| Homo_sapiens | MSX2    | ENSG00000120149 | Homeobox | ENSP00000239243; | 4488      |
| Homo_sapiens | ZNF174  | ENSG00000103343 | zf-C2H2  | ENSP00000268655; | 7727      |
| Homo_sapiens | TRPS1   | ENSG00000104447 | zf-GATA  | ENSP00000428680; | 7227      |
| Homo_sapiens | ZNF616  | ENSG00000204611 | zf-C2H2  | ENSP00000471000; | 90317     |
| Homo_sapiens | DNAJC2  | ENSG00000105821 | MYB      | ENSP00000368565; | 27000     |
| Homo_sapiens | ATF3    | ENSG00000162772 | TF_bZIP  | ENSP00000355954; | 467       |
| Homo_sapiens | HOXB3   | ENSG00000120093 | Homeobox | ENSP00000418035; | 3213      |
| Homo_sapiens | ZNF101  | ENSG00000181896 | zf-C2H2  | ENSP00000468049; | 94039     |
| Homo_sapiens | ZNF583  | ENSG00000198440 | zf-C2H2  | ENSP00000291598; | 147949    |
| Homo_sapiens | ZNF880  | ENSG00000221923 | zf-C2H2  | ENSP00000406318; | 400713    |
| Homo_sapiens | ELF4    | ENSG00000102034 | ETS      | ENSP00000478297; | 2000      |
| Homo_sapiens | ZHX2    | ENSG00000178764 | Homeobox | ENSP00000314709; | 22882     |
| Homo_sapiens | GSC     | ENSG00000133937 | Homeobox | ENSP00000238558; | 145258    |
| Homo_sapiens | ZNF71   | ENSG00000197951 | zf-C2H2  | ENSP00000328245; | 58491     |
| Homo_sapiens | HBP1    | ENSG00000105856 | HMG      | ENSP00000418738; | 26959     |
| Homo_sapiens | HOXB8   | ENSG00000120068 | Homeobox | ENSP00000460659; | 3218      |
| Homo_sapiens | ZNF302  | ENSG00000089335 | zf-C2H2  | ENSP00000396379; | 55900     |
| Homo_sapiens | ZFP41   | ENSG00000181638 | zf-C2H2  | ENSP00000327427; | 286128    |
| Homo_sapiens | TBX20   | ENSG00000164532 | T-box    | ENSP00000386170; | 57057     |
| Homo_sapiens | NEUROG1 | ENSG00000181965 | bHLH     | ENSP00000317580; | 4762      |
| Homo_sapiens | DUX4    | ENSG00000260596 | Homeobox | ENSP00000458065; | 100288687 |



|              |         |                 |           |                  |           |
|--------------|---------|-----------------|-----------|------------------|-----------|
| Homo_sapiens | PKNOX2  | ENSG00000165495 | Homeobox  | ENSP00000298282; | 63876     |
| Homo_sapiens | SMARCA1 | ENSG00000102038 | MYB       | ENSP00000360162; | 6594      |
| Homo_sapiens | ZSCAN18 | ENSG00000121413 | zf-C2H2   | ENSP00000412253; | 65982     |
| Homo_sapiens | ZNF334  | ENSG00000198185 | zf-C2H2   | ENSP00000485779; | 55713     |
| Homo_sapiens | ZNF219  | ENSG00000165804 | zf-C2H2   | ENSP00000450609; | 51222     |
| Homo_sapiens | THRA    | ENSG00000126351 | THR-like  | ENSP00000264637; | 7067      |
| Homo_sapiens | ZIM2    | ENSG00000269699 | zf-C2H2   | ENSP00000470326; | 23619     |
| Homo_sapiens | TCF24   | ENSG00000261787 | bHLH      | ENSP00000455444; | 100129654 |
| Homo_sapiens | ZNF181  | ENSG00000197841 | zf-C2H2   | ENSP00000420727; | 339318    |
| Homo_sapiens | ALX4    | ENSG00000052850 | Homeobox  | ENSP00000332744; | 60529     |
| Homo_sapiens | HDX     | ENSG00000165259 | Homeobox  | ENSP00000297977; | 139324    |
| Homo_sapiens | ZNF530  | ENSG00000183647 | zf-C2H2   | ENSP00000332861; | 348327    |
| Homo_sapiens | GMEB2   | ENSG00000101216 | SAND      | ENSP00000359094; | 26205     |
| Homo_sapiens | SMAD9   | ENSG00000120693 | MH1       | ENSP00000382216; | 4093      |
| Homo_sapiens | HOXC11  | ENSG00000123388 | Homeobox  | ENSP00000446680; | 3227      |
| Homo_sapiens | ZNF502  | ENSG00000196653 | zf-C2H2   | ENSP00000296091; | 91392     |
| Homo_sapiens | ZNF114  | ENSG00000178150 | zf-C2H2   | ENSP00000469998; | 163071    |
| Homo_sapiens | TBX4    | ENSG00000121075 | T-box     | ENSP00000495714; | 9496      |
| Homo_sapiens | E2F6    | ENSG00000169016 | E2F       | ENSP00000446315; | 1876      |
| Homo_sapiens | FOXD4L4 | ENSG00000184659 | Fork_head | ENSP00000366630; | 349334    |
| Homo_sapiens | ZNF233  | ENSG00000159915 | zf-C2H2   | ENSP00000375820; | 353355    |
| Homo_sapiens | ZNF230  | ENSG00000159882 | zf-C2H2   | ENSP00000409318; | 7773      |
| Homo_sapiens | ZNF594  | ENSG00000180626 | zf-C2H2   | ENSP00000382513; | 84622     |
| Homo_sapiens | TULP1   | ENSG00000112041 | Tub       | ENSP00000477534; | 7287      |
| Homo_sapiens | HOXB9   | ENSG00000170689 | Homeobox  | ENSP00000309439; | 3219      |
| Homo_sapiens | SSRP1   | ENSG00000149136 | HMG       | ENSP00000489564; | 6749      |
| Homo_sapiens | DLX3    | ENSG00000064195 | Homeobox  | ENSP00000449976; | 1747      |
| Homo_sapiens | ZBTB1   | ENSG00000126804 | ZBTB      | ENSP00000451000; | 22890     |
| Homo_sapiens | AHR     | ENSG00000106546 | bHLH      | ENSP00000436466; | 196       |
| Homo_sapiens | ZNF660  | ENSG00000144792 | zf-C2H2   | ENSP00000324605; | 285349    |
| Homo_sapiens | CSRNP2  | ENSG00000110925 | CSRNP_N   | ENSP00000228515; | 81566     |
| Homo_sapiens | HIVEP3  | ENSG00000127124 | zf-C2H2   | ENSP00000361665; | 59269     |
| Homo_sapiens | FOXJ3   | ENSG00000198815 | Fork_head | ENSP00000393408; | 22887     |
| Homo_sapiens | PRDM8   | ENSG00000152784 | zf-C2H2   | ENSP00000406998; | 56978     |
| Homo_sapiens | RORC    | ENSG00000143365 | THR-like  | ENSP00000327025; | 6097      |
| Homo_sapiens | CEBPG   | ENSG00000153879 | TF_bZIP   | ENSP00000284000; | 1054      |
| Homo_sapiens | BACH1   | ENSG00000156273 | TF_bZIP   | ENSP00000416569; | 100379661 |
| Homo_sapiens | ZNF705B | ENSG00000215356 | zf-C2H2   | ENSP00000382987; | 100132396 |
| Homo_sapiens | ZNF319  | ENSG00000166188 | zf-C2H2   | ENSP00000299237; | 57567     |
| Homo_sapiens | FOXR1   | ENSG00000176302 | Fork_head | ENSP00000314806; | 283150    |
| Homo_sapiens | ZNF41   | ENSG00000147124 | zf-C2H2   | ENSP00000315173; | 7592      |
| Homo_sapiens | YBX1    | ENSG00000065978 | CSD       | ENSP00000361626; | 4904      |
| Homo_sapiens | SATB2   | ENSG00000119042 | CUT       | ENSP00000388764; | 23314     |
| Homo_sapiens | ZSCAN1  | ENSG00000152467 | zf-C2H2   | ENSP00000282326; | 284312    |
| Homo_sapiens | ZNF571  | ENSG00000180479 | zf-C2H2   | ENSP00000351594; | 51276     |
| Homo_sapiens | NKX2-8  | ENSG00000136327 | Homeobox  | ENSP00000258829; | 26257     |
| Homo_sapiens | ZNF3    | ENSG00000166526 | zf-C2H2   | ENSP00000299667; | 7551      |
| Homo_sapiens | TEAD2   | ENSG00000074219 | TEA       | ENSP00000366419; | 8463      |
| Homo_sapiens | NR5A1   | ENSG00000136931 | SF-like   | ENSP00000483309; | 2516      |
| Homo_sapiens | ZNF485  | ENSG00000198298 | zf-C2H2   | ENSP00000363558; | 220992    |
| Homo_sapiens | NR2F2   | ENSG00000185551 | RXR-like  | ENSP00000377721; | 7026      |
| Homo_sapiens | ZNF491  | ENSG00000177599 | zf-C2H2   | ENSP00000313443; | 126069    |
| Homo_sapiens | SP6     | ENSG00000189120 | zf-C2H2   | ENSP00000340799; | 80320     |
| Homo_sapiens | ZNF439  | ENSG00000171291 | zf-C2H2   | ENSP00000395632; | 90594     |
| Homo_sapiens | KLF14   | ENSG00000266265 | zf-C2H2   | ENSP00000463287; | 136259    |
| Homo_sapiens | IKZF1   | ENSG00000185811 | zf-C2H2   | ENSP00000413025; | 10320     |
| Homo_sapiens | UBP1    | ENSG00000153560 | CP2       | ENSP00000395558; | 7342      |
| Homo_sapiens | DUXB    | ENSG00000282757 | Homeobox  | ENSP00000491301; | 100033411 |

|              |            |                 |           |                   |        |
|--------------|------------|-----------------|-----------|-------------------|--------|
| Homo_sapiens | FOXA3      | ENSG00000170608 | Fork_head | ENSP00000304004;  | 3171   |
| Homo_sapiens | ZBTB26     | ENSG00000171448 | ZBTB      | ENSP00000362760;  | 57684  |
| Homo_sapiens | ZNF215     | ENSG00000149054 | zf-C2H2   | ENSP00000393202;  | 7762   |
| Homo_sapiens | ZNF284     | ENSG00000186026 | zf-C2H2   | ENSP00000411032;  | 342909 |
| Homo_sapiens | ZNF667     | ENSG00000198046 | zf-C2H2   | ENSP00000439402;  | 63934  |
| Homo_sapiens | ZKSCAN2    | ENSG00000155592 | zf-C2H2   | ENSP00000331626;  | 342357 |
| Homo_sapiens | THAP9      | ENSG00000168152 | THAP      | ENSP00000305533;  | 79725  |
| Homo_sapiens | TCF21      | ENSG00000118526 | bHLH      | ENSP00000237316;  | 6943   |
| Homo_sapiens | ZNF197     | ENSG00000186448 | zf-C2H2   | ENSP00000345809;  | 10168  |
| Homo_sapiens | ZNF549     | ENSG00000121406 | zf-C2H2   | ENSP00000365407;  | 256051 |
| Homo_sapiens | PROX1      | ENSG00000117707 | HPD       | ENSP00000420283;  | 5629   |
| Homo_sapiens | TCFL5      | ENSG00000101190 | bHLH      | ENSP00000217162;  | 10732  |
| Homo_sapiens | FOSL2      | ENSG00000075426 | TF_bZIP   | ENSP00000264716;  | 2355   |
| Homo_sapiens | E2F3       | ENSG00000112242 | E2F       | ENSP00000443418;  | 1871   |
| Homo_sapiens | BAZ2A      | ENSG00000076108 | MBD       | ENSP00000368754;  | 11176  |
| Homo_sapiens | HMGB3      | ENSG00000029993 | HMG       | ENSP00000410354;  | 3149   |
| Homo_sapiens | ZNF599     | ENSG00000153896 | zf-C2H2   | ENSP00000333802;  | 148103 |
| Homo_sapiens | ZNF492     | ENSG00000229676 | zf-C2H2   | ENSP00000413660;  | 57615  |
| Homo_sapiens | ZNF232     | ENSG00000167840 | zf-C2H2   | ENSP00000250076;  | 7775   |
| Homo_sapiens | MIER3      | ENSG00000155545 | MYB       | ENSP00000386584;  | 166968 |
| Homo_sapiens | GLI1       | ENSG00000111087 | zf-C2H2   | ENSP00000436671;  | 2735   |
| Homo_sapiens | ZBTB24     | ENSG00000112365 | ZBTB      | ENSP00000230122;  | 9841   |
| Homo_sapiens | ZNF532     | ENSG00000074657 | zf-C2H2   | ENSP00000468532;  | 55205  |
| Homo_sapiens | ZNF644     | ENSG00000122482 | zf-C2H2   | ENSP00000482748;  | 84146  |
| Homo_sapiens | HOXD3      | ENSG00000128652 | Homeobox  | ENSP00000386498;  | 3232   |
| Homo_sapiens | UBTF       | ENSG00000108312 | HMG       | ENSP00000345297;  | 7343   |
| Homo_sapiens | ZNF410     | ENSG00000119725 | zf-C2H2   | ENSP00000334170;  | 57862  |
| Homo_sapiens | SP140      | ENSG00000079263 | SAND      | ENSP00000393618;  | 11262  |
| Homo_sapiens | ZNF92      | ENSG00000146757 | zf-C2H2   | ENSP00000400495;  | 168374 |
| Homo_sapiens | HINFP      | ENSG00000172273 | zf-C2H2   | ENSP00000318085;  | 25988  |
| Homo_sapiens | LHX8       | ENSG00000162624 | Homeobox  | ENSP00000294638;  | 431707 |
| Homo_sapiens | AC025287.4 | ENSG00000284484 | Homeobox  | ENSP00000491197;- |        |
| Homo_sapiens | ZNF20      | ENSG00000132010 | zf-C2H2   | ENSP00000335437;  | 7568   |
| Homo_sapiens | ZNF418     | ENSG00000196724 | zf-C2H2   | ENSP00000379451;  | 147686 |
| Homo_sapiens | ZBTB14     | ENSG00000198081 | ZBTB      | ENSP00000349503;  | 7541   |
| Homo_sapiens | MLXIP      | ENSG00000175727 | bHLH      | ENSP00000445891;  | 22877  |
| Homo_sapiens | CREB3L4    | ENSG00000143578 | TF_bZIP   | ENSP00000357592;  | 148327 |
| Homo_sapiens | SCX        | ENSG00000260428 | bHLH      | ENSP00000476384;  | 642658 |
| Homo_sapiens | NANOGP8    | ENSG00000255192 | Homeobox  | ENSP00000487045;  | 388112 |
| Homo_sapiens | ZNF548     | ENSG00000188785 | zf-C2H2   | ENSP00000379482;  | 147694 |
| Homo_sapiens | L3MBTL4    | ENSG00000154655 | zf-C2HC   | ENSP00000318543;  | 91133  |
| Homo_sapiens | ZNF655     | ENSG00000197343 | zf-C2H2   | ENSP00000252713;  | 79027  |
| Homo_sapiens | AC118549   | ENSG00000036549 | MYB       | ENSP00000359837;  | 26009  |
| Homo_sapiens | TBX10      | ENSG00000167800 | T-box     | ENSP00000335191;  | 347853 |
| Homo_sapiens | ZNF587     | ENSG00000198466 | zf-C2H2   | ENSP00000345479;  | 84914  |
| Homo_sapiens | AC012531.3 | ENSG00000273049 | Homeobox  | ENSP00000476742;- |        |
| Homo_sapiens | ELF1       | ENSG00000120690 | ETS       | ENSP00000489586;  | 1997   |
| Homo_sapiens | AC073612.1 | ENSG00000258064 | THAP      | ENSP00000454911;- |        |
| Homo_sapiens | LIN28A     | ENSG00000131914 | CSD       | ENSP00000254231;  | 79727  |
| Homo_sapiens | HMGXB4     | ENSG00000100281 | HMG       | ENSP00000216106;  | 10042  |
| Homo_sapiens | ZNF396     | ENSG00000186496 | zf-C2H2   | ENSP00000466500;  | 252884 |
| Homo_sapiens | NR2E1      | ENSG00000112333 | RXR-like  | ENSP00000357982;  | 7101   |
| Homo_sapiens | ZNF823     | ENSG00000197933 | zf-C2H2   | ENSP00000340683;  | 55552  |
| Homo_sapiens | STAT4      | ENSG00000138378 | STAT      | ENSP00000376134;  | 6775   |
| Homo_sapiens | ZNF626     | ENSG00000188171 | zf-C2H2   | ENSP00000484232;  | 199777 |
| Homo_sapiens | AC105001.2 | ENSG00000258724 | HMG       | ENSP00000451145;- |        |
| Homo_sapiens | TEF        | ENSG00000167074 | TF_bZIP   | ENSP00000266304;  | 7008   |
| Homo_sapiens | PPARA      | ENSG00000186951 | THR-like  | ENSP00000385523;  | 5465   |

|              |         |                 |            |                  |           |
|--------------|---------|-----------------|------------|------------------|-----------|
| Homo_sapiens | ZNF8    | ENSG00000278129 | zf-C2H2    | ENSP00000477716; | 7554      |
| Homo_sapiens | ZNF501  | ENSG00000186446 | zf-C2H2    | ENSP00000379363; | 115560    |
| Homo_sapiens | ZNF454  | ENSG00000178187 | zf-C2H2    | ENSP00000326249; | 285676    |
| Homo_sapiens | PRDM2   | ENSG00000116731 | zf-C2H2    | ENSP00000312352; | 7799      |
| Homo_sapiens | ETS1    | ENSG00000134954 | ETS        | ENSP00000441430; | 2113      |
| Homo_sapiens | PRDM6   | ENSG00000061455 | zf-C2H2    | ENSP00000384725; | 93166     |
| Homo_sapiens | ZBED3   | ENSG00000132846 | zf-BED     | ENSP00000427487; | 84327     |
| Homo_sapiens | ZNF354C | ENSG00000177932 | zf-C2H2    | ENSP00000324064; | 30832     |
| Homo_sapiens | ESX1    | ENSG00000123576 | Homeobox   | ENSP00000361669; | 80712     |
| Homo_sapiens | HOXB6   | ENSG00000108511 | Homeobox   | ENSP00000420009; | 3216      |
| Homo_sapiens | NFKB1   | ENSG00000109320 | RHD        | ENSP00000226574; | 4790      |
| Homo_sapiens | TULP3   | ENSG00000078246 | Tub        | ENSP00000380321; | 7289      |
| Homo_sapiens | RARG    | ENSG00000172819 | THR-like   | ENSP00000343698; | 5916      |
| Homo_sapiens | ZNF705G | ENSG00000215372 | zf-C2H2    | ENSP00000383020; | 100131980 |
| Homo_sapiens | OLIG3   | ENSG00000177468 | bHLH       | ENSP00000356708; | 167826    |
| Homo_sapiens | ZNF821  | ENSG00000102984 | zf-C2H2    | ENSP00000458112; | 55565     |
| Homo_sapiens | HNF4A   | ENSG00000101076 | RXR-like   | ENSP00000315180; | 3172      |
| Homo_sapiens | TCF7    | ENSG00000081059 | HMG        | ENSP00000378472; | 6932      |
| Homo_sapiens | SMAD4   | ENSG00000141646 | MH1        | ENSP00000381452; | 4089      |
| Homo_sapiens | DMRTC2  | ENSG00000142025 | DM         | ENSP00000470553; | 63946     |
| Homo_sapiens | ZBED5   | ENSG00000236287 | zf-BED     | ENSP00000398106; | 58486     |
| Homo_sapiens | NEUROG3 | ENSG00000122859 | bHLH       | ENSP00000242462; | 50674     |
| Homo_sapiens | ESR2    | ENSG00000140009 | ESR-like   | ENSP00000450488; | 2100      |
| Homo_sapiens | ZNF683  | ENSG00000176083 | zf-C2H2    | ENSP00000388792; | 257101    |
| Homo_sapiens | ZEB1    | ENSG00000148516 | zf-C2H2    | ENSP00000452787; | 6935      |
| Homo_sapiens | NPAS3   | ENSG00000151322 | bHLH       | ENSP00000319610; | 64067     |
| Homo_sapiens | ZNF785  | ENSG00000197162 | zf-C2H2    | ENSP00000420340; | 146540    |
| Homo_sapiens | HOXA4   | ENSG00000197576 | Homeobox   | ENSP00000448015; | 3201      |
| Homo_sapiens | ZNF831  | ENSG00000124203 | zf-C2H2    | ENSP00000360069; | 128611    |
| Homo_sapiens | HOXB5   | ENSG00000120075 | Homeobox   | ENSP00000239151; | 3215      |
| Homo_sapiens | HMGXB3  | ENSG00000113716 | HMG        | ENSP00000422231; | 22993     |
| Homo_sapiens | ZNF227  | ENSG00000131115 | zf-C2H2    | ENSP00000375823; | 7770      |
| Homo_sapiens | ZNF446  | ENSG00000083838 | zf-C2H2    | ENSP00000472219; | 55663     |
| Homo_sapiens | PAXBP1  | ENSG00000159086 | GCFC       | ENSP00000290178; | 94104     |
| Homo_sapiens | HSFX2   | ENSG00000268738 | HSF        | ENSP00000469223; | 100130086 |
| Homo_sapiens | ARID4B  | ENSG00000054267 | ARID       | ENSP00000391497; | 51742     |
| Homo_sapiens | ZNF157  | ENSG00000147117 | zf-C2H2    | ENSP00000366273; | 7712      |
| Homo_sapiens | MXD4    | ENSG00000123933 | bHLH       | ENSP00000337889; | 10608     |
| Homo_sapiens | LRRFIP1 | ENSG00000124831 | LRRFIP     | ENSP00000375857; | 9208      |
| Homo_sapiens | ZFP30   | ENSG00000120784 | zf-C2H2    | ENSP00000343581; | 22835     |
| Homo_sapiens | ELF3    | ENSG00000163435 | ETS        | ENSP00000356253; | 1999      |
| Homo_sapiens | INSM2   | ENSG00000168348 | zf-C2H2    | ENSP00000306523; | 84684     |
| Homo_sapiens | HMGA1   | ENSG00000137309 | HMGA       | ENSP00000385693; | 3159      |
| Homo_sapiens | MITF    | ENSG00000187098 | bHLH       | ENSP00000418845; | 4286      |
| Homo_sapiens | MXI1    | ENSG00000119950 | bHLH       | ENSP00000358625; | 4601      |
| Homo_sapiens | NR4A1   | ENSG00000123358 | NGFIB-like | ENSP00000353427; | 3164      |
| Homo_sapiens | ZNF585B | ENSG00000245680 | zf-C2H2    | ENSP00000436774; | 92285     |
| Homo_sapiens | TBX21   | ENSG00000073861 | T-box      | ENSP00000177694; | 30009     |
| Homo_sapiens | TFAP2C  | ENSG00000087510 | AP-2       | ENSP00000201031; | 7022      |
| Homo_sapiens | HMG20A  | ENSG00000140382 | HMG        | ENSP00000452864; | 10363     |
| Homo_sapiens | ZNF770  | ENSG00000198146 | zf-C2H2    | ENSP00000453474; | 54989     |
| Homo_sapiens | KLF6    | ENSG00000067082 | zf-C2H2    | ENSP00000419923; | 1316      |
| Homo_sapiens | GLI2    | ENSG00000074047 | zf-C2H2    | ENSP00000354586; | 2736      |
| Homo_sapiens | SIX4    | ENSG00000100625 | Homeobox   | ENSP00000450761; | 51804     |
| Homo_sapiens | ZNF813  | ENSG00000198346 | zf-C2H2    | ENSP00000379684; | 126017    |
| Homo_sapiens | ZNF7    | ENSG00000147789 | zf-C2H2    | ENSP00000432724; | 7553      |
| Homo_sapiens | FO XK2  | ENSG00000141568 | Fork_head  | ENSP00000335677; | 3607      |
| Homo_sapiens | ZNF577  | ENSG00000161551 | zf-C2H2    | ENSP00000491349; | 84765     |

|              |         |                 |            |                  |           |
|--------------|---------|-----------------|------------|------------------|-----------|
| Homo_sapiens | RHOXF2B | ENSG00000203989 | Homeobox   | ENSP00000360455; | 727940    |
| Homo_sapiens | ZNF623  | ENSG00000183309 | zf-C2H2    | ENSP00000435232; | 9831      |
| Homo_sapiens | USF3    | ENSG00000176542 | bHLH       | ENSP00000420721; | 205717    |
| Homo_sapiens | SOX12   | ENSG00000177732 | HMG        | ENSP00000347646; | 6666      |
| Homo_sapiens | HSF4    | ENSG00000102878 | HSF        | ENSP00000427832; | 3299      |
| Homo_sapiens | ZNF705E | ENSG00000214534 | zf-C2H2    | ENSP00000492790; | 100131539 |
| Homo_sapiens | GCM2    | ENSG00000124827 | GCM        | ENSP00000368805; | 9247      |
| Homo_sapiens | E2F4    | ENSG00000205250 | E2F        | ENSP00000458082; | 1874      |
| Homo_sapiens | FOXP1   | ENSG00000114861 | Fork_head  | ENSP00000482847; | 27086     |
| Homo_sapiens | FOXF1   | ENSG00000103241 | Fork_head  | ENSP00000262426; | 2294      |
| Homo_sapiens | DMRT1   | ENSG00000137090 | DM         | ENSP00000371711; | 1761      |
| Homo_sapiens | ZNF518B | ENSG00000178163 | zf-C2H2    | ENSP00000317614; | 85460     |
| Homo_sapiens | ZNF436  | ENSG00000125945 | zf-C2H2    | ENSP00000313582; | 80818     |
| Homo_sapiens | NHLH1   | ENSG00000171786 | bHLH       | ENSP00000302189; | 4807      |
| Homo_sapiens | ZBTB33  | ENSG00000177485 | ZBTB       | ENSP00000450969; | 10009     |
| Homo_sapiens | SP8     | ENSG00000164651 | zf-C2H2    | ENSP00000408792; | 221833    |
| Homo_sapiens | NR1D2   | ENSG00000174738 | THR-like   | ENSP00000373283; | 9975      |
| Homo_sapiens | FLI1    | ENSG00000151702 | ETS        | ENSP00000281428; | 2313      |
| Homo_sapiens | REPIN1  | ENSG00000214022 | zf-C2H2    | ENSP00000428562; | 29803     |
| Homo_sapiens | SNAI2   | ENSG0000019549  | zf-C2H2    | ENSP00000494171; | 6591      |
| Homo_sapiens | TFAP2A  | ENSG00000137203 | AP-2       | ENSP00000419961; | 7020      |
| Homo_sapiens | ETS2    | ENSG00000157557 | ETS        | ENSP00000354194; | 2114      |
| Homo_sapiens | ZNF735  | ENSG00000223614 | zf-C2H2    | ENSP00000485547; | 730291    |
| Homo_sapiens | HOXC5   | ENSG00000172789 | Homeobox   | ENSP00000309336; | 3222      |
| Homo_sapiens | SOX9    | ENSG00000125398 | HMG        | ENSP00000495527; | 6662      |
| Homo_sapiens | NR2C1   | ENSG00000120798 | RXR-like   | ENSP00000376813; | 7181      |
| Homo_sapiens | NFYA    | ENSG00000001167 | NF-YA      | ENSP00000229418; | 4800      |
| Homo_sapiens | NKX3-2  | ENSG00000109705 | Homeobox   | ENSP00000371875; | 579       |
| Homo_sapiens | TTF1    | ENSG00000125482 | MYB        | ENSP00000481441; | 7270      |
| Homo_sapiens | NR4A3   | ENSG00000119508 | NGFIB-like | ENSP00000333122; | 8013      |
| Homo_sapiens | ZNF768  | ENSG00000169957 | zf-C2H2    | ENSP00000369777; | 79724     |
| Homo_sapiens | SETDB2  | ENSG00000136169 | MBD        | ENSP00000346175; | 83852     |
| Homo_sapiens | FOXI1   | ENSG00000168269 | Fork_head  | ENSP00000415483; | 2299      |
| Homo_sapiens | ZNF574  | ENSG00000105732 | zf-C2H2    | ENSP00000351939; | 64763     |
| Homo_sapiens | FOXL1   | ENSG00000176678 | Fork_head  | ENSP00000326272; | 2300      |
| Homo_sapiens | ZNF527  | ENSG00000189164 | zf-C2H2    | ENSP00000390179; | 84503     |
| Homo_sapiens | CIC     | ENSG00000079432 | HMG        | ENSP00000160740; | 23152     |
| Homo_sapiens | HES6    | ENSG00000144485 | bHLH       | ENSP00000387155; | 55502     |
| Homo_sapiens | NKX2-6  | ENSG00000180053 | Homeobox   | ENSP00000320089; | 137814    |
| Homo_sapiens | NR1D1   | ENSG00000126368 | THR-like   | ENSP00000246672; | 9572      |
| Homo_sapiens | ZNF121  | ENSG00000197961 | zf-C2H2    | ENSP00000468643; | 7675      |
| Homo_sapiens | ZBTB7C  | ENSG00000184828 | ZBTB       | ENSP00000468254; | 201501    |
| Homo_sapiens | ZNF619  | ENSG00000177873 | zf-C2H2    | ENSP00000398024; | 285267    |
| Homo_sapiens | SOX2    | ENSG00000181449 | HMG        | ENSP00000323588; | 6657      |
| Homo_sapiens | ZNF131  | ENSG00000172262 | ZBTB       | ENSP00000423945; | 7690      |
| Homo_sapiens | E2F1    | ENSG00000101412 | E2F        | ENSP00000345571; | 1869      |
| Homo_sapiens | ZNF678  | ENSG00000181450 | zf-C2H2    | ENSP00000344828; | 339500    |
| Homo_sapiens | ZSCAN25 | ENSG00000197037 | zf-C2H2    | ENSP00000262941; | 221785    |
| Homo_sapiens | THAP8   | ENSG00000161277 | THAP       | ENSP00000292894; | 199745    |
| Homo_sapiens | ZNF596  | ENSG00000172748 | zf-C2H2    | ENSP00000310033; | 169270    |
| Homo_sapiens | ZNF622  | ENSG00000173545 | zf-C2H2    | ENSP00000310042; | 90441     |
| Homo_sapiens | ZBTB2   | ENSG00000181472 | ZBTB       | ENSP00000323183; | 57621     |
| Homo_sapiens | ZSCAN26 | ENSG00000197062 | zf-C2H2    | ENSP00000485228; | 7741      |
| Homo_sapiens | MYF6    | ENSG00000111046 | bHLH       | ENSP00000228641; | 4618      |
| Homo_sapiens | ZNF236  | ENSG00000130856 | zf-C2H2    | ENSP00000463787; | 7776      |
| Homo_sapiens | ZNF589  | ENSG00000164048 | zf-C2H2    | ENSP00000404592; | 51385     |
| Homo_sapiens | TWIST2  | ENSG00000233608 | bHLH       | ENSP00000405176; | 117581    |
| Homo_sapiens | PATZ1   | ENSG00000100105 | ZBTB       | ENSP00000337520; | 23598     |

|              |            |                 |           |                   |           |
|--------------|------------|-----------------|-----------|-------------------|-----------|
| Homo_sapiens | LBX1       | ENSG00000138136 | Homeobox  | ENSP00000359212;  | 10660     |
| Homo_sapiens | ZBTB40     | ENSG00000184677 | ZBTB      | ENSP00000384527;  | 9923      |
| Homo_sapiens | ZSCAN16    | ENSG00000196812 | zf-C2H2   | ENSP00000366527;  | 80345     |
| Homo_sapiens | ZNF202     | ENSG00000166261 | zf-C2H2   | ENSP00000433881;  | 7753      |
| Homo_sapiens | ZNF782     | ENSG00000196597 | zf-C2H2   | ENSP00000419397;  | 158431    |
| Homo_sapiens | HSFX3      | ENSG00000283697 | HSF       | ENSP00000490928;  | 101928917 |
| Homo_sapiens | ZNF721     | ENSG00000182903 | zf-C2H2   | ENSP00000340524;  | 170960    |
| Homo_sapiens | ZNF676     | ENSG00000196109 | zf-C2H2   | ENSP00000380310;  | 163223    |
| Homo_sapiens | ZXDC       | ENSG00000070476 | zf-C2H2   | ENSP00000374359;  | 79364     |
| Homo_sapiens | ZNF576     | ENSG00000124444 | zf-C2H2   | ENSP00000435934;  | 79177     |
| Homo_sapiens | POU3F1     | ENSG00000185668 | Pou       | ENSP00000362103;  | 5453      |
| Homo_sapiens | IRF6       | ENSG00000117595 | IRF       | ENSP00000355988;  | 3664      |
| Homo_sapiens | OSR1       | ENSG00000143867 | zf-C2H2   | ENSP00000272223;  | 130497    |
| Homo_sapiens | PRDM14     | ENSG00000147596 | zf-C2H2   | ENSP00000276594;  | 63978     |
| Homo_sapiens | ZNF586     | ENSG00000083828 | zf-C2H2   | ENSP00000375583;  | 54807     |
| Homo_sapiens | TBX19      | ENSG00000143178 | T-box     | ENSP00000356795;  | 9095      |
| Homo_sapiens | FOXN2      | ENSG00000170802 | Fork_head | ENSP00000388486;  | 3344      |
| Homo_sapiens | EVX2       | ENSG00000174279 | Homeobox  | ENSP00000312385;  | 344191    |
| Homo_sapiens | ZBED1      | ENSG00000214717 | zf-BED    | ENSP00000370621;  | 9189      |
| Homo_sapiens | IRX6       | ENSG00000159387 | Homeobox  | ENSP00000290552;  | 79190     |
| Homo_sapiens | PBX2       | ENSG00000204304 | Homeobox  | ENSP00000364190;  | 5089      |
| Homo_sapiens | CLOCK      | ENSG00000134852 | bHLH      | ENSP00000396649;  | 9575      |
| Homo_sapiens | TAL1       | ENSG00000162367 | bHLH      | ENSP00000294339;  | 6886      |
| Homo_sapiens | HELT       | ENSG00000187821 | bHLH      | ENSP00000422140;  | 391723    |
| Homo_sapiens | DLX5       | ENSG00000105880 | Homeobox  | ENSP00000222598;  | 1749      |
| Homo_sapiens | GTF2IRD2   | ENSG00000196275 | GTF2I     | ENSP00000406723;  | 84163     |
| Homo_sapiens | HMGB1      | ENSG00000189403 | HMG       | ENSP00000369904;  | 3146      |
| Homo_sapiens | HMX1       | ENSG00000215612 | Homeobox  | ENSP00000383516;  | 3166      |
| Homo_sapiens | GBX2       | ENSG00000168505 | Homeobox  | ENSP00000302251;  | 2637      |
| Homo_sapiens | NFIX       | ENSG00000008441 | CTF/NFI   | ENSP00000465094;  | 4784      |
| Homo_sapiens | ZNF646     | ENSG00000167395 | zf-C2H2   | ENSP00000391271;  | 9726      |
| Homo_sapiens | ZNF479     | ENSG00000185177 | zf-C2H2   | ENSP00000333776;  | 90827     |
| Homo_sapiens | AC073111.3 | ENSG00000284041 | zf-C2H2   | ENSP00000419336;- |           |
| Homo_sapiens | EVX1       | ENSG00000106038 | Homeobox  | ENSP00000419266;  | 2128      |
| Homo_sapiens | MZF1       | ENSG00000099326 | zf-C2H2   | ENSP00000469493;  | 7593      |
| Homo_sapiens | RUNX3      | ENSG00000020633 | Runt      | ENSP00000308051;  | 864       |
| Homo_sapiens | HOXD12     | ENSG00000170178 | Homeobox  | ENSP00000385586;  | 3238      |
| Homo_sapiens | JUND       | ENSG00000130522 | TF_bZIP   | ENSP00000252818;  | 3727      |
| Homo_sapiens | RXR        | ENSG00000204231 | RXR-like  | ENSP00000363817;  | 6257      |
| Homo_sapiens | ZNF208     | ENSG00000160321 | zf-C2H2   | ENSP00000380315;  | 7757      |
| Homo_sapiens | ZNF383     | ENSG00000188283 | zf-C2H2   | ENSP00000464871;  | 163087    |
| Homo_sapiens | ESRRB      | ENSG00000119715 | ESR-like  | ENSP00000370270;  | 2103      |
| Homo_sapiens | ZNF891     | ENSG00000214029 | zf-C2H2   | ENSP00000437590;  | 101060200 |
| Homo_sapiens | ZNF699     | ENSG00000196110 | zf-C2H2   | ENSP00000311596;  | 374879    |
| Homo_sapiens | NR2E3      | ENSG00000278570 | RXR-like  | ENSP00000482504;  | 10002     |
| Homo_sapiens | ZNF335     | ENSG00000198026 | zf-C2H2   | ENSP00000325326;  | 63925     |
| Homo_sapiens | STAT1      | ENSG00000115415 | STAT      | ENSP00000386244;  | 6772      |
| Homo_sapiens | GATAD2A    | ENSG00000167491 | zf-GATA   | ENSP00000351552;  | 54815     |
| Homo_sapiens | ZFPM1      | ENSG00000179588 | zf-C2H2   | ENSP00000326630;  | 161882    |
| Homo_sapiens | NFE2L2     | ENSG00000116044 | TF_bZIP   | ENSP00000380252;  | 4780      |
| Homo_sapiens | ZNF276     | ENSG00000158805 | zf-C2H2   | ENSP00000415836;  | 92822     |
| Homo_sapiens | ESRRG      | ENSG00000196482 | ESR-like  | ENSP00000352077;  | 2104      |
| Homo_sapiens | ZNF835     | ENSG00000127903 | zf-C2H2   | ENSP00000444747;  | 90485     |
| Homo_sapiens | TP53       | ENSG00000141510 | P53       | ENSP00000425104;  | 7157      |
| Homo_sapiens | ZNF514     | ENSG00000144026 | zf-C2H2   | ENSP00000295208;  | 84874     |
| Homo_sapiens | ZFP82      | ENSG00000181007 | zf-C2H2   | ENSP00000431265;  | 284406    |
| Homo_sapiens | ZNF728     | ENSG00000269067 | zf-C2H2   | ENSP00000471593;  | 388523    |
| Homo_sapiens | PBX1       | ENSG00000185630 | Homeobox  | ENSP00000453188;  | 5087      |

|              |            |                 |               |                   |           |
|--------------|------------|-----------------|---------------|-------------------|-----------|
| Homo_sapiens | NR1I3      | ENSG00000143257 | THR-like      | ENSP00000421374;  | 9970      |
| Homo_sapiens | ZNF780A    | ENSG00000197782 | zf-C2H2       | ENSP00000472189;  | 284323    |
| Homo_sapiens | NPAS2      | ENSG00000170485 | bHLH          | ENSP00000388528;  | 4862      |
| Homo_sapiens | ZNF154     | ENSG00000179909 | zf-C2H2       | ENSP00000469633;  | 7710      |
| Homo_sapiens | RERE       | ENSG00000142599 | zf-GATA       | ENSP00000366684;  | 473       |
| Homo_sapiens | NFATC1     | ENSG00000131196 | RHD           | ENSP00000466489;  | 4772      |
| Homo_sapiens | SALL2      | ENSG00000165821 | zf-C2H2       | ENSP00000483562;  | 6297      |
| Homo_sapiens | ATF6       | ENSG00000118217 | TF_bZIP       | ENSP00000356919;  | 22926     |
| Homo_sapiens | PBX3       | ENSG00000167081 | Homeobox      | ENSP00000362588;  | 5090      |
| Homo_sapiens | JARID2     | ENSG00000008083 | ARID          | ENSP00000341280;  | 3720      |
| Homo_sapiens | PKNOX1     | ENSG00000160199 | Homeobox      | ENSP00000402243;  | 5316      |
| Homo_sapiens | ELF5       | ENSG00000135374 | ETS           | ENSP00000484521;  | 2001      |
| Homo_sapiens | ZNF714     | ENSG00000160352 | zf-C2H2       | ENSP00000478345;  | 148206    |
| Homo_sapiens | NFIB       | ENSG00000147862 | CTF/NFI       | ENSP00000475362;  | 4781      |
| Homo_sapiens | NR0B1      | ENSG00000169297 | Miscellaneous | ENSP00000368246;  | 190       |
| Homo_sapiens | ZNF664     | ENSG00000179195 | zf-C2H2       | ENSP00000441405;  | 144348    |
| Homo_sapiens | DACH2      | ENSG00000126733 | DACH          | ENSP00000420896;  | 117154    |
| Homo_sapiens | SOX15      | ENSG00000129194 | HMG           | ENSP00000458286;  | 6665      |
| Homo_sapiens | RBAK       | ENSG00000146587 | zf-C2H2       | ENSP00000275423;  | 57786     |
| Homo_sapiens | ZNF14      | ENSG00000105708 | zf-C2H2       | ENSP00000340514;  | 7561      |
| Homo_sapiens | CDIP1      | ENSG00000089486 | zf-LITAF-like | ENSP00000382508;  | 29965     |
| Homo_sapiens | VSX1       | ENSG00000100987 | Homeobox      | ENSP00000386612;  | 30813     |
| Homo_sapiens | HOXD13     | ENSG00000128714 | Homeobox      | ENSP00000376322;  | 3239      |
| Homo_sapiens | ZNF423     | ENSG00000102935 | zf-C2H2       | ENSP00000455426;  | 23090     |
| Homo_sapiens | ZNF552     | ENSG00000178935 | zf-C2H2       | ENSP00000375582;  | 79818     |
| Homo_sapiens | ZNF730     | ENSG00000183850 | zf-C2H2       | ENSP00000472959;  | 100129543 |
| Homo_sapiens | ZNF781     | ENSG00000196381 | zf-C2H2       | ENSP00000351391;  | 163115    |
| Homo_sapiens | AC010616.1 | ENSG00000268041 | ETS           | ENSP00000491574;  | 390937    |
| Homo_sapiens | IRX1       | ENSG00000170549 | Homeobox      | ENSP00000305244;  | 79192     |
| Homo_sapiens | ARID1A     | ENSG00000117713 | ARID          | ENSP00000478955;  | 8289      |
| Homo_sapiens | ZNF716     | ENSG00000182111 | zf-C2H2       | ENSP00000394248;  | 441234    |
| Homo_sapiens | PRDM12     | ENSG00000130711 | zf-C2H2       | ENSP00000253008;  | 59335     |
| Homo_sapiens | TSHZ2      | ENSG00000182463 | zf-C2H2       | ENSP00000360552;  | 128553    |
| Homo_sapiens | KLF13      | ENSG00000169926 | zf-C2H2       | ENSP00000452609;  | 51621     |
| Homo_sapiens | FOXO6      | ENSG00000204060 | Fork_head     | ENSP00000493184;- |           |
| Homo_sapiens | IRX2       | ENSG00000170561 | Homeobox      | ENSP00000372056;  | 153572    |
| Homo_sapiens | MYBL1      | ENSG00000185697 | MYB           | ENSP00000429633;  | 4603      |
| Homo_sapiens | CEBPA      | ENSG00000245848 | TF_bZIP       | ENSP00000427514;  | 1050      |
| Homo_sapiens | ZNF407     | ENSG00000215421 | zf-C2H2       | ENSP00000310359;  | 55628     |
| Homo_sapiens | MIXL1      | ENSG00000185155 | Homeobox      | ENSP00000355775;  | 83881     |
| Homo_sapiens | MEIS1      | ENSG00000143995 | Homeobox      | ENSP00000454209;  | 4211      |
| Homo_sapiens | ZNF671     | ENSG00000083814 | zf-C2H2       | ENSP00000321848;  | 79891     |
| Homo_sapiens | AC138696.1 | ENSG00000264668 | zf-C2H2       | ENSP00000428966;- |           |
| Homo_sapiens | ZNF630     | ENSG00000221994 | zf-C2H2       | ENSP00000354683;  | 57232     |
| Homo_sapiens | ZNF524     | ENSG00000171443 | zf-C2H2       | ENSP00000301073;  | 147807    |
| Homo_sapiens | MEF2B      | ENSG00000213999 | SRF           | ENSP00000386480;  | 100271849 |
| Homo_sapiens | ZNF662     | ENSG00000182983 | zf-C2H2       | ENSP00000329264;  | 389114    |
| Homo_sapiens | ZNF534     | ENSG00000198633 | zf-C2H2       | ENSP00000391358;  | 147658    |
| Homo_sapiens | PRDM5      | ENSG00000138738 | zf-C2H2       | ENSP00000404832;  | 11107     |
| Homo_sapiens | TOX2       | ENSG00000124191 | HMG           | ENSP00000390278;  | 84969     |
| Homo_sapiens | ZNF415     | ENSG00000170954 | zf-C2H2       | ENSP00000395055;  | 55786     |
| Homo_sapiens | ZBTB20     | ENSG00000181722 | ZBTB          | ENSP00000420324;  | 26137     |
| Homo_sapiens | ZNF740     | ENSG00000139651 | zf-C2H2       | ENSP00000409463;  | 283337    |
| Homo_sapiens | SPIC       | ENSG00000166211 | ETS           | ENSP00000448580;  | 121599    |
| Homo_sapiens | TBX15      | ENSG00000092607 | T-box         | ENSP00000207157;  | 6913      |
| Homo_sapiens | ZNF766     | ENSG00000196214 | zf-C2H2       | ENSP00000409652;  | 90321     |
| Homo_sapiens | ZNF25      | ENSG00000175395 | zf-C2H2       | ENSP00000302222;  | 219749    |
| Homo_sapiens | PMS1       | ENSG00000064933 | HMG           | ENSP00000401064;  | 5378      |

|              |            |                 |               |                   |           |
|--------------|------------|-----------------|---------------|-------------------|-----------|
| Homo_sapiens | MYC        | ENSG00000136997 | bHLH          | ENSP00000367207;  | 4609      |
| Homo_sapiens | SIX6       | ENSG00000184302 | Homeobox      | ENSP00000328596;  | 4990      |
| Homo_sapiens | POU2F3     | ENSG00000137709 | Pou           | ENSP00000441687;  | 25833     |
| Homo_sapiens | EHF        | ENSG00000135373 | ETS           | ENSP00000433508;  | 26298     |
| Homo_sapiens | ZNF544     | ENSG00000198131 | zf-C2H2       | ENSP00000469635;  | 27300     |
| Homo_sapiens | NANOGNB    | ENSG00000205857 | Homeobox      | ENSP00000492127;  | 360030    |
| Homo_sapiens | ZBTB43     | ENSG00000169155 | ZBTB          | ENSP00000362563;  | 23099     |
| Homo_sapiens | ZNF536     | ENSG00000198597 | zf-C2H2       | ENSP00000465771;  | 9745      |
| Homo_sapiens | ZNF440     | ENSG00000171295 | zf-C2H2       | ENSP00000393489;  | 126070    |
| Homo_sapiens | RORB       | ENSG00000198963 | THR-like      | ENSP00000366093;  | 6096      |
| Homo_sapiens | ZNF844     | ENSG00000223547 | zf-C2H2       | ENSP00000448588;  | 284391    |
| Homo_sapiens | ZNF263     | ENSG00000006194 | zf-C2H2       | ENSP00000461146;  | 10127     |
| Homo_sapiens | ZNF846     | ENSG00000196605 | zf-C2H2       | ENSP00000467891;  | 100505555 |
| Homo_sapiens | MTA2       | ENSG00000149480 | zf-GATA       | ENSP00000278823;  | 9219      |
| Homo_sapiens | CBFB       | ENSG00000067955 | CBF           | ENSP00000415151;  | 865       |
| Homo_sapiens | NPAS1      | ENSG00000130751 | bHLH          | ENSP00000405290;  | 4861      |
| Homo_sapiens | AC022167.5 | ENSG00000283516 | zf-LITAF-like | ENSP00000490446;- |           |
| Homo_sapiens | ZNF57      | ENSG00000171970 | zf-C2H2       | ENSP00000478776;  | 126295    |
| Homo_sapiens | EN2        | ENSG00000164778 | Homeobox      | ENSP00000297375;  | 2020      |
| Homo_sapiens | ZFPM2      | ENSG00000169946 | zf-C2H2       | ENSP00000428720;  | 23414     |
| Homo_sapiens | HESX1      | ENSG00000163666 | Homeobox      | ENSP00000295934;  | 8820      |
| Homo_sapiens | SP3        | ENSG00000172845 | zf-C2H2       | ENSP00000492253;  | 6670      |
| Homo_sapiens | E2F8       | ENSG00000129173 | E2F           | ENSP00000481103;  | 79733     |
| Homo_sapiens | ZNF563     | ENSG00000188868 | zf-C2H2       | ENSP00000469879;  | 147837    |
| Homo_sapiens | MAFK       | ENSG00000198517 | TF_bZIP       | ENSP00000385437;  | 7975      |
| Homo_sapiens | ZNF569     | ENSG00000196437 | zf-C2H2       | ENSP00000325018;  | 148266    |
| Homo_sapiens | ZNF300     | ENSG00000145908 | zf-C2H2       | ENSP00000397178;  | 91975     |
| Homo_sapiens | HES7       | ENSG00000179111 | bHLH          | ENSP00000314774;  | 84667     |
| Homo_sapiens | NR1I2      | ENSG00000144852 | THR-like      | ENSP00000336528;  | 8856      |
| Homo_sapiens | SOX7       | ENSG00000171056 | HMG           | ENSP00000301921;  | 83595     |
| Homo_sapiens | ZBTB39     | ENSG00000166860 | ZBTB          | ENSP00000300101;  | 9880      |
| Homo_sapiens | ZNF398     | ENSG00000197024 | zf-C2H2       | ENSP00000389972;  | 57541     |
| Homo_sapiens | ZNF420     | ENSG00000197050 | zf-C2H2       | ENSP00000338770;  | 147923    |
| Homo_sapiens | NCOR1      | ENSG00000141027 | MYB           | ENSP00000379189;  | 9611      |
| Homo_sapiens | SHOX       | ENSG00000185960 | Homeobox      | ENSP00000370987;  | 6473      |
| Homo_sapiens | CEBPE      | ENSG00000092067 | TF_bZIP       | ENSP00000206513;  | 1053      |
| Homo_sapiens | LITAF      | ENSG00000189067 | zf-LITAF-like | ENSP00000461813;  | 9516      |
| Homo_sapiens | SEBOX      | ENSG00000274529 | Homeobox      | ENSP00000444503;  | 645832    |
| Homo_sapiens | ZBTB11     | ENSG00000066422 | ZBTB          | ENSP00000326200;  | 27107     |
| Homo_sapiens | FOXP2      | ENSG00000128573 | Fork_head     | ENSP00000489229;  | 93986     |
| Homo_sapiens | TLX2       | ENSG00000115297 | Homeobox      | ENSP00000233638;  | 3196      |
| Homo_sapiens | TOX3       | ENSG00000103460 | HMG           | ENSP00000219746;  | 27324     |
| Homo_sapiens | NR3C2      | ENSG00000151623 | ESR-like      | ENSP00000423510;  | 4306      |
| Homo_sapiens | POU5F1     | ENSG00000204531 | Pou           | ENSP00000484778;  | 5460      |
| Homo_sapiens | ZNF573     | ENSG00000189144 | zf-C2H2       | ENSP00000349861;  | 126231    |
| Homo_sapiens | ZNF350     | ENSG00000256683 | zf-C2H2       | ENSP00000243644;  | 59348     |
| Homo_sapiens | ZNF324     | ENSG00000083812 | zf-C2H2       | ENSP00000471778;  | 25799     |
| Homo_sapiens | ZBTB32     | ENSG00000011590 | ZBTB          | ENSP00000262630;  | 27033     |
| Homo_sapiens | ZNF394     | ENSG00000160908 | zf-C2H2       | ENSP00000337363;  | 84124     |
| Homo_sapiens | FOXD4L5    | ENSG00000204779 | Fork_head     | ENSP00000366637;  | 653427    |
| Homo_sapiens | AHRR       | ENSG00000063438 | bHLH          | ENSP00000428893;  | 57491     |
| Homo_sapiens | PRDM4      | ENSG00000110851 | zf-C2H2       | ENSP00000228437;  | 11108     |
| Homo_sapiens | GFI1B      | ENSG00000165702 | zf-C2H2       | ENSP00000361195;  | 8328      |
| Homo_sapiens | ZNF341     | ENSG00000131061 | zf-C2H2       | ENSP00000344308;  | 84905     |
| Homo_sapiens | KLF15      | ENSG00000163884 | zf-C2H2       | ENSP00000296233;  | 28999     |
| Homo_sapiens | ZMIZ1      | ENSG00000108175 | zf-MIZ        | ENSP00000401558;  | 57178     |
| Homo_sapiens | ZSCAN4     | ENSG00000180532 | zf-C2H2       | ENSP00000480210;  | 201516    |
| Homo_sapiens | ZNF850     | ENSG00000267041 | zf-C2H2       | ENSP00000464976;  | 342892    |

|              |            |                 |           |                   |           |
|--------------|------------|-----------------|-----------|-------------------|-----------|
| Homo_sapiens | ZNF256     | ENSG00000152454 | zf-C2H2   | ENSP00000282308;  | 10172     |
| Homo_sapiens | ZBTB46     | ENSG00000130584 | ZBTB      | ENSP00000303102;  | 140685    |
| Homo_sapiens | HSFY1      | ENSG00000172468 | HSF       | ENSP00000342302;  | 86614     |
| Homo_sapiens | HSFY2      | ENSG00000169953 | HSF       | ENSP00000372303;  | 159119    |
| Homo_sapiens | HOXC8      | ENSG00000037965 | Homeobox  | ENSP00000040584;  | 3224      |
| Homo_sapiens | ZNF33A     | ENSG00000189180 | zf-C2H2   | ENSP00000485869;  | 7581      |
| Homo_sapiens | ARNTL      | ENSG00000133794 | bHLH      | ENSP00000431488;  | 406       |
| Homo_sapiens | RLF        | ENSG00000117000 | zf-C2H2   | ENSP00000361857;  | 6018      |
| Homo_sapiens | SOX1       | ENSG00000182968 | HMG       | ENSP00000330218;  | 6656      |
| Homo_sapiens | DMRT3      | ENSG00000064218 | DM        | ENSP00000190165;  | 58524     |
| Homo_sapiens | ZNF624     | ENSG00000197566 | zf-C2H2   | ENSP00000310472;  | 57547     |
| Homo_sapiens | NPAS4      | ENSG00000174576 | bHLH      | ENSP00000492526;  | 266743    |
| Homo_sapiens | ZSCAN30    | ENSG00000186814 | zf-C2H2   | ENSP00000329738;  | 100101467 |
| Homo_sapiens | GLIS1      | ENSG00000174332 | zf-C2H2   | ENSP00000486112;  | 148979    |
| Homo_sapiens | ZNF146     | ENSG00000167635 | zf-C2H2   | ENSP00000400391;  | 7705      |
| Homo_sapiens | FOXM1      | ENSG00000111206 | Fork_head | ENSP00000342307;  | 2305      |
| Homo_sapiens | AC092329.3 | ENSG00000283201 | zf-C2H2   | ENSP00000478939;- |           |
| Homo_sapiens | SIX2       | ENSG00000170577 | Homeobox  | ENSP00000304502;  | 10736     |
| Homo_sapiens | KLF18      | ENSG00000283039 | zf-C2H2   | ENSP00000489024;  | 105378952 |
| Homo_sapiens | MESP1      | ENSG00000166823 | bHLH      | ENSP00000300057;  | 55897     |
| Homo_sapiens | BHLHE40    | ENSG00000134107 | bHLH      | ENSP00000256495;  | 8553      |
| Homo_sapiens | ZNF483     | ENSG00000173258 | zf-C2H2   | ENSP00000311679;  | 158399    |
| Homo_sapiens | HES3       | ENSG00000173673 | bHLH      | ENSP00000367130;  | 390992    |
| Homo_sapiens | RUNX1      | ENSG00000159216 | Runt      | ENSP00000388189;  | 100506403 |
| Homo_sapiens | ZNF430     | ENSG00000118620 | zf-C2H2   | ENSP00000261560;  | 80264     |
| Homo_sapiens | MYNN       | ENSG00000085274 | ZBTB      | ENSP00000326240;  | 55892     |
| Homo_sapiens | HSFX4      | ENSG00000283463 | HSF       | ENSP00000489814;  | 101927685 |
| Homo_sapiens | ZNF711     | ENSG00000147180 | zf-C2H2   | ENSP00000276123;  | 7552      |
| Homo_sapiens | TBX5       | ENSG00000089225 | T-box     | ENSP00000384152;  | 6910      |
| Homo_sapiens | POU6F2     | ENSG00000106536 | Pou       | ENSP00000430514;  | 11281     |
| Homo_sapiens | RXRA       | ENSG00000186350 | RXR-like  | ENSP00000419692;  | 6256      |
| Homo_sapiens | WDHD1      | ENSG00000198554 | HMG       | ENSP00000399349;  | 11169     |
| Homo_sapiens | LBX2       | ENSG00000179528 | Homeobox  | ENSP00000366789;  | 85474     |
| Homo_sapiens | ZNF764     | ENSG00000169951 | zf-C2H2   | ENSP00000252797;  | 92595     |
| Homo_sapiens | RFX6       | ENSG00000185002 | RFX       | ENSP00000332208;  | 222546    |
| Homo_sapiens | SOX17      | ENSG00000164736 | HMG       | ENSP00000297316;  | 64321     |
| Homo_sapiens | ZFP91-CNTF | ENSG00000255073 | zf-C2H2   | ENSP00000455911;- |           |
| Homo_sapiens | ZHX1       | ENSG00000165156 | Homeobox  | ENSP00000297857;  | 11244     |
| Homo_sapiens | ZNF48      | ENSG00000180035 | zf-C2H2   | ENSP00000324056;  | 197407    |
| Homo_sapiens | SP7        | ENSG00000170374 | zf-C2H2   | ENSP00000441367;  | 121340    |
| Homo_sapiens | CSRNP1     | ENSG00000144655 | CSRNP_N   | ENSP00000273153;  | 64651     |
| Homo_sapiens | DLX6       | ENSG00000006377 | Homeobox  | ENSP00000451635;  | 1750      |
| Homo_sapiens | HSF1       | ENSG00000185122 | HSF       | ENSP00000383590;  | 3297      |
| Homo_sapiens | ERG        | ENSG00000157554 | ETS       | ENSP00000288319;  | 2078      |
| Homo_sapiens | MAF        | ENSG00000178573 | TF_bZIP   | ENSP00000327048;  | 4094      |
| Homo_sapiens | ZNF404     | ENSG00000176222 | zf-C2H2   | ENSP00000319479;  | 342908    |
| Homo_sapiens | AL033529.1 | ENSG00000254553 | ZBTB      | ENSP00000455300;- |           |
| Homo_sapiens | ZNF275     | ENSG00000063587 | zf-C2H2   | ENSP00000359271;  | 105373378 |
| Homo_sapiens | RFX3       | ENSG00000080298 | RFX       | ENSP00000351574;  | 5991      |
| Homo_sapiens | MAZ        | ENSG00000103495 | zf-C2H2   | ENSP00000458201;  | 4150      |
| Homo_sapiens | IKZF5      | ENSG00000095574 | zf-C2H2   | ENSP00000478056;  | 64376     |
| Homo_sapiens | KLF9       | ENSG00000119138 | zf-C2H2   | ENSP00000366330;  | 687       |
| Homo_sapiens | ZNF665     | ENSG00000197497 | zf-C2H2   | ENSP00000469154;  | 79788     |
| Homo_sapiens | ZNF682     | ENSG00000197124 | zf-C2H2   | ENSP00000470718;  | 91120     |
| Homo_sapiens | ZNF566     | ENSG00000186017 | zf-C2H2   | ENSP00000465343;  | 84924     |
| Homo_sapiens | FOXB1      | ENSG00000171956 | Fork_head | ENSP00000379369;  | 27023     |
| Homo_sapiens | DBX2       | ENSG00000185610 | Homeobox  | ENSP00000331470;  | 440097    |
| Homo_sapiens | FOXG1      | ENSG00000176165 | Fork_head | ENSP00000339004;  | 2290      |



|              |            |                 |            |                   |           |
|--------------|------------|-----------------|------------|-------------------|-----------|
| Homo_sapiens | JUNB       | ENSG00000171223 | TF_bZIP    | ENSP00000303315;  | 3726      |
| Homo_sapiens | DPRX       | ENSG00000204595 | Homeobox   | ENSP00000365838;  | 503834    |
| Homo_sapiens | MAFF       | ENSG00000185022 | TF_bZIP    | ENSP00000416493;  | 23764     |
| Homo_sapiens | SRY        | ENSG00000184895 | HMG        | ENSP00000372547;  | 6736      |
| Homo_sapiens | FOXP4      | ENSG00000137166 | Fork_head  | ENSP00000362154;  | 116113    |
| Homo_sapiens | MYRF       | ENSG00000124920 | NDT80/PhoG | ENSP00000265460;  | 745       |
| Homo_sapiens | AFF2       | ENSG00000155966 | AF-4       | ENSP00000286437;  | 2334      |
| Homo_sapiens | OVOL2      | ENSG00000125850 | zf-C2H2    | ENSP00000278780;  | 58495     |
| Homo_sapiens | TGIF2LY    | ENSG00000176679 | Homeobox   | ENSP00000318502;  | 90655     |
| Homo_sapiens | ZSCAN29    | ENSG00000140265 | zf-C2H2    | ENSP00000456883;  | 146050    |
| Homo_sapiens | ZNF852     | ENSG00000178917 | zf-C2H2    | ENSP00000389841;  | 285346    |
| Homo_sapiens | TCF23      | ENSG00000163792 | bHLH       | ENSP00000296096;  | 150921    |
| Homo_sapiens | FOSB       | ENSG00000125740 | TF_bZIP    | ENSP00000466530;  | 2354      |
| Homo_sapiens | BHMG1      | ENSG00000237452 | HMG        | ENSP00000402674;  | 388553    |
| Homo_sapiens | NKX2-2     | ENSG00000125820 | Homeobox   | ENSP00000366347;  | 4821      |
| Homo_sapiens | POU3F2     | ENSG00000184486 | Pou        | ENSP00000329170;  | 5454      |
| Homo_sapiens | NR2F6      | ENSG00000160113 | RXR-like   | ENSP00000291442;  | 2063      |
| Homo_sapiens | BCL11A     | ENSG00000119866 | zf-C2H2    | ENSP00000496168;  | 53335     |
| Homo_sapiens | AC115220.1 | ENSG00000241149 | zf-C2H2    | ENSP00000492202;- |           |
| Homo_sapiens | ZNF268     | ENSG00000090612 | zf-C2H2    | ENSP00000444412;  | 10795     |
| Homo_sapiens | TULP4      | ENSG00000130338 | Tub        | ENSP00000356064;  | 56995     |
| Homo_sapiens | ASCL5      | ENSG00000232237 | bHLH       | ENSP00000469019;  | 647219    |
| Homo_sapiens | HIC1       | ENSG00000177374 | ZBTB       | ENSP00000314080;  | 3090      |
| Homo_sapiens | ZBTB45     | ENSG00000119574 | ZBTB       | ENSP00000346603;  | 84878     |
| Homo_sapiens | ZNF836     | ENSG00000196267 | zf-C2H2    | ENSP00000325038;  | 162962    |
| Homo_sapiens | ZNF670     | ENSG00000277462 | zf-C2H2    | ENSP00000355459;  | 93474     |
| Homo_sapiens | ZFHX2      | ENSG00000136367 | Homeobox   | ENSP00000413418;  | 85446     |
| Homo_sapiens | FOXF2      | ENSG00000137273 | Fork_head  | ENSP00000259806;  | 2295      |
| Homo_sapiens | SMARCE1    | ENSG00000073584 | HMG        | ENSP00000495857;  | 6605      |
| Homo_sapiens | ZNF789     | ENSG00000198556 | zf-C2H2    | ENSP00000331927;  | 285989    |
| Homo_sapiens | MYT1L      | ENSG00000186487 | zf-C2HC    | ENSP00000384219;  | 23040     |
| Homo_sapiens | ZNF24      | ENSG00000172466 | zf-C2H2    | ENSP00000382015;  | 7572      |
| Homo_sapiens | TBX3       | ENSG00000135111 | T-box      | ENSP00000257567;  | 6926      |
| Homo_sapiens | NEUROD4    | ENSG00000123307 | bHLH       | ENSP00000242994;  | 58158     |
| Homo_sapiens | AR         | ENSG00000169083 | ESR-like   | ENSP00000484033;  | 367       |
| Homo_sapiens | MBD2       | ENSG00000134046 | MBD        | ENSP00000381435;  | 8932      |
| Homo_sapiens | ZNF189     | ENSG00000136870 | zf-C2H2    | ENSP00000259395;  | 7743      |
| Homo_sapiens | PHOX2A     | ENSG00000165462 | Homeobox   | ENSP00000298231;  | 401       |
| Homo_sapiens | ZFP64      | ENSG00000202056 | zf-C2H2    | ENSP00000344615;  | 55734     |
| Homo_sapiens | SMAD6      | ENSG00000137834 | MH1        | ENSP00000452955;  | 4091      |
| Homo_sapiens | THAP10     | ENSG00000129028 | THAP       | ENSP00000249861;  | 56906     |
| Homo_sapiens | AC073111.5 | ENSG00000284691 | zf-C2H2    | ENSP00000492887;- |           |
| Homo_sapiens | FOXD4L3    | ENSG00000187559 | Fork_head  | ENSP00000341961;  | 286380    |
| Homo_sapiens | TP73       | ENSG00000078900 | P53        | ENSP00000367537;  | 7161      |
| Homo_sapiens | ZNF587B    | ENSG00000269343 | zf-C2H2    | ENSP00000472004;  | 100293516 |
| Homo_sapiens | HOXB13     | ENSG00000159184 | Homeobox   | ENSP00000290295;  | 10481     |
| Homo_sapiens | BHLHA9     | ENSG00000205899 | bHLH       | ENSP00000375248;  | 727857    |
| Homo_sapiens | ZNF184     | ENSG00000096654 | zf-C2H2    | ENSP00000366636;  | 7738      |
| Homo_sapiens | ZNF471     | ENSG00000196263 | zf-C2H2    | ENSP00000309161;  | 57573     |
| Homo_sapiens | HOXA5      | ENSG00000106004 | Homeobox   | ENSP00000222726;  | 3202      |
| Homo_sapiens | ZNF362     | ENSG00000160094 | zf-C2H2    | ENSP00000446335;  | 149076    |
| Homo_sapiens | ZBTB17     | ENSG00000116809 | ZBTB       | ENSP00000438529;  | 7709      |
| Homo_sapiens | ZNF160     | ENSG00000170949 | zf-C2H2    | ENSP00000470961;  | 90338     |
| Homo_sapiens | GABPA      | ENSG00000154727 | ETS        | ENSP00000346886;  | 2551      |
| Homo_sapiens | ZNF142     | ENSG00000115568 | zf-C2H2    | ENSP00000408643;  | 7701      |
| Homo_sapiens | ZNF771     | ENSG00000179965 | zf-C2H2    | ENSP00000323945;  | 51333     |
| Homo_sapiens | THAP12     | ENSG00000137492 | THAP       | ENSP00000433966;  | 5612      |
| Homo_sapiens | HMX3       | ENSG00000188620 | Homeobox   | ENSP00000350549;  | 340784    |

|              |               |                 |           |                   |           |
|--------------|---------------|-----------------|-----------|-------------------|-----------|
| Homo_sapiens | ZNF736        | ENSG00000234444 | zf-C2H2   | ENSP00000347210;  | 728927    |
| Homo_sapiens | ZFP14         | ENSG00000142065 | zf-C2H2   | ENSP00000270001;  | 57677     |
| Homo_sapiens | RORA          | ENSG00000069667 | THR-like  | ENSP00000402971;  | 6095      |
| Homo_sapiens | PAX4          | ENSG00000106331 | PAX       | ENSP00000491782;  | 5078      |
| Homo_sapiens | ZBTB4         | ENSG00000174282 | ZBTB      | ENSP00000307858;  | 57659     |
| Homo_sapiens | HOXC4         | ENSG00000198353 | Homeobox  | ENSP00000305973;  | 3221      |
| Homo_sapiens | CREB5         | ENSG00000146592 | TF_bZIP   | ENSP00000379593;  | 9586      |
| Homo_sapiens | POU4F1        | ENSG00000152192 | Pou       | ENSP00000366413;  | 5457      |
| Homo_sapiens | KLF12         | ENSG00000118922 | zf-C2H2   | ENSP00000366897;  | 11278     |
| Homo_sapiens | ZNF345        | ENSG00000251247 | zf-C2H2   | ENSP00000491547;  | 25850     |
| Homo_sapiens | TEAD1         | ENSG00000187079 | TEA       | ENSP00000334754;  | 7003      |
| Homo_sapiens | LMX1B         | ENSG00000136944 | Homeobox  | ENSP00000347684;  | 4010      |
| Homo_sapiens | PIAS1         | ENSG00000033800 | zf-MIZ    | ENSP00000249636;  | 8554      |
| Homo_sapiens | NR1H2         | ENSG00000131408 | THR-like  | ENSP00000472526;  | 7376      |
| Homo_sapiens | ZNF324B       | ENSG00000249471 | zf-C2H2   | ENSP00000438930;  | 388569    |
| Homo_sapiens | MYCN          | ENSG00000134323 | bHLH      | ENSP00000281043;  | 4613      |
| Homo_sapiens | ZNF175        | ENSG00000105497 | zf-C2H2   | ENSP00000262259;  | 7728      |
| Homo_sapiens | VENTX         | ENSG00000151650 | Homeobox  | ENSP00000357556;  | 27287     |
| Homo_sapiens | ZNF559-ZNF177 | ENSG00000270011 | zf-C2H2   | ENSP00000445323;  | 100529215 |
| Homo_sapiens | VDR           | ENSG00000111424 | THR-like  | ENSP00000229022;  | 7421      |
| Homo_sapiens | ZNF546        | ENSG00000187187 | zf-C2H2   | ENSP00000469540;  | 339327    |
| Homo_sapiens | AFF3          | ENSG00000144218 | AF-4      | ENSP00000395068;  | 3899      |
| Homo_sapiens | MBD1          | ENSG00000141644 | MBD       | ENSP00000381502;  | 4152      |
| Homo_sapiens | KLF16         | ENSG00000129911 | zf-C2H2   | ENSP00000483701;  | 83855     |
| Homo_sapiens | ZNF737        | ENSG00000237440 | zf-C2H2   | ENSP00000471995;  | 100129842 |
| Homo_sapiens | ZNF169        | ENSG00000175787 | zf-C2H2   | ENSP00000378792;  | 169841    |
| Homo_sapiens | ZNF695        | ENSG00000197472 | zf-C2H2   | ENSP00000341236;  | 57116     |
| Homo_sapiens | SP5           | ENSG00000204335 | zf-C2H2   | ENSP00000364430;  | 389058    |
| Homo_sapiens | CAMTA2        | ENSG00000108509 | CG-1      | ENSP00000459519;  | 23125     |
| Homo_sapiens | SOX6          | ENSG00000110693 | HMG       | ENSP00000324948;  | 55553     |
| Homo_sapiens | CAMTA1        | ENSG00000171735 | CG-1      | ENSP00000306522;  | 23261     |
| Homo_sapiens | DDIT3         | ENSG00000175197 | TF_bZIP   | ENSP00000494844;  | 1649      |
| Homo_sapiens | ZNF525        | ENSG00000203326 | zf-C2H2   | ENSP00000419136;  | 170958    |
| Homo_sapiens | LEUTX         | ENSG00000213921 | Homeobox  | ENSP00000380053;  | 342900    |
| Homo_sapiens | AC092835.1    | ENSG00000233757 | zf-C2H2   | ENSP00000478941;- |           |
| Homo_sapiens | ZKSCAN7       | ENSG00000196345 | zf-C2H2   | ENSP00000405034;  | 55888     |
| Homo_sapiens | ZNF285        | ENSG00000267508 | zf-C2H2   | ENSP00000483662;  | 26974     |
| Homo_sapiens | RCOR2         | ENSG00000167771 | MYB       | ENSP00000301459;  | 283248    |
| Homo_sapiens | ARGFX         | ENSG00000186103 | Homeobox  | ENSP00000335578;  | 503582    |
| Homo_sapiens | ZNF30         | ENSG00000168661 | zf-C2H2   | ENSP00000403441;  | 90075     |
| Homo_sapiens | MNX1          | ENSG00000130675 | Homeobox  | ENSP00000438552;  | 3110      |
| Homo_sapiens | MYF5          | ENSG00000111049 | bHLH      | ENSP00000228644;  | 4617      |
| Homo_sapiens | ZNF354B       | ENSG00000178338 | zf-C2H2   | ENSP00000327143;  | 117608    |
| Homo_sapiens | NKX3-1        | ENSG00000167034 | Homeobox  | ENSP00000370253;  | 4824      |
| Homo_sapiens | KLF3          | ENSG00000109787 | zf-C2H2   | ENSP00000261438;  | 51274     |
| Homo_sapiens | FOXD4L1       | ENSG00000184492 | Fork_head | ENSP00000302756;  | 200350    |
| Homo_sapiens | PITX2         | ENSG00000164093 | Homeobox  | ENSP00000484909;  | 5308      |
| Homo_sapiens | ZNF772        | ENSG00000197128 | zf-C2H2   | ENSP00000395967;  | 400720    |
| Homo_sapiens | ZBTB16        | ENSG00000109906 | ZBTB      | ENSP00000376721;  | 7704      |
| Homo_sapiens | ZNF575        | ENSG00000176472 | zf-C2H2   | ENSP00000472578;  | 284346    |
| Homo_sapiens | ZNF620        | ENSG00000177842 | zf-C2H2   | ENSP00000322265;  | 253639    |
| Homo_sapiens | ZNF761        | ENSG00000160336 | zf-C2H2   | ENSP00000481272;  | 388561    |
| Homo_sapiens | ZNF793        | ENSG00000188227 | zf-C2H2   | ENSP00000487183;  | 390927    |
| Homo_sapiens | ZNF254        | ENSG00000213096 | zf-C2H2   | ENSP00000349494;  | 9534      |
| Homo_sapiens | TFAP2B        | ENSG00000008196 | AP-2      | ENSP00000377265;  | 7021      |
| Homo_sapiens | SNAPC4        | ENSG00000165684 | MYB       | ENSP00000298532;  | 6621      |
| Homo_sapiens | ZNF675        | ENSG00000197372 | zf-C2H2   | ENSP00000352836;  | 171392    |
| Homo_sapiens | ZNF860        | ENSG00000197385 | zf-C2H2   | ENSP00000373274;  | 344787    |

|              |            |                 |            |                   |           |
|--------------|------------|-----------------|------------|-------------------|-----------|
| Homo_sapiens | FOXD3      | ENSG00000187140 | Fork_head  | ENSP00000360157;  | 27022     |
| Homo_sapiens | ZNF132     | ENSG00000131849 | zf-C2H2    | ENSP00000254166;  | 7691      |
| Homo_sapiens | NFE2L3     | ENSG00000050344 | TF_bZIP    | ENSP00000056233;  | 9603      |
| Homo_sapiens | ZNF510     | ENSG00000081386 | zf-C2H2    | ENSP00000223428;  | 22869     |
| Homo_sapiens | HOXC6      | ENSG00000197757 | Homeobox   | ENSP00000243108;  | 3223      |
| Homo_sapiens | THR8       | ENSG00000151090 | THR-like   | ENSP00000493709;  | 7068      |
| Homo_sapiens | ZNF774     | ENSG00000196391 | zf-C2H2    | ENSP00000346348;  | 342132    |
| Homo_sapiens | ZFP28      | ENSG00000196867 | zf-C2H2    | ENSP00000301318;  | 140612    |
| Homo_sapiens | NFE2L1     | ENSG00000082641 | TF_bZIP    | ENSP00000464446;  | 4779      |
| Homo_sapiens | HOXD4      | ENSG00000170166 | Homeobox   | ENSP00000302548;  | 3233      |
| Homo_sapiens | ZNF681     | ENSG00000196172 | zf-C2H2    | ENSP00000384000;  | 148213    |
| Homo_sapiens | NFIL3      | ENSG00000165030 | TF_bZIP    | ENSP00000297689;  | 4783      |
| Homo_sapiens | FOXP3      | ENSG00000049768 | Fork_head  | ENSP00000365380;  | 50943     |
| Homo_sapiens | CUX2       | ENSG00000111249 | CUT        | ENSP00000261726;  | 23316     |
| Homo_sapiens | CREB3      | ENSG00000107175 | TF_bZIP    | ENSP00000342136;  | 10488     |
| Homo_sapiens | ARNT2      | ENSG00000172379 | bHLH       | ENSP00000453792;  | 9915      |
| Homo_sapiens | MTA3       | ENSG00000057935 | zf-GATA    | ENSP00000385045;  | 57504     |
| Homo_sapiens | AEBP2      | ENSG00000139154 | zf-C2H2    | ENSP00000354267;  | 121536    |
| Homo_sapiens | TEAD4      | ENSG00000197905 | TEA        | ENSP00000444528;  | 7004      |
| Homo_sapiens | ZNF250     | ENSG00000196150 | zf-C2H2    | ENSP00000292579;  | 58500     |
| Homo_sapiens | FOXD2      | ENSG00000186564 | Fork_head  | ENSP00000335493;  | 2306      |
| Homo_sapiens | JAZF1      | ENSG00000153814 | zf-C2H2    | ENSP00000283928;  | 221895    |
| Homo_sapiens | MYRFL      | ENSG00000166268 | NDT80/PhoG | ENSP00000449598;  | 196446    |
| Homo_sapiens | THAP1      | ENSG00000131931 | THAP       | ENSP00000254250;  | 55145     |
| Homo_sapiens | ZNF578     | ENSG00000258405 | zf-C2H2    | ENSP00000459216;  | 147660    |
| Homo_sapiens | ZNF461     | ENSG00000197808 | zf-C2H2    | ENSP00000479057;  | 92283     |
| Homo_sapiens | IKZF3      | ENSG00000161405 | zf-C2H2    | ENSP00000420463;  | 22806     |
| Homo_sapiens | FOXJ2      | ENSG00000065970 | Fork_head  | ENSP00000403411;  | 55810     |
| Homo_sapiens | AC187653.1 | ENSG00000248767 | Fork_head  | ENSP00000492766;  | 100288524 |
| Homo_sapiens | ZNF788     | ENSG00000214189 | zf-C2H2    | ENSP00000380866;- |           |
| Homo_sapiens | ZNF708     | ENSG00000182141 | zf-C2H2    | ENSP00000469961;  | 7562      |
| Homo_sapiens | TERB1      | ENSG00000249961 | MYB        | ENSP00000462883;  | 283847    |
| Homo_sapiens | ZFP92      | ENSG00000189420 | zf-C2H2    | ENSP00000462054;  | 139735    |
| Homo_sapiens | IRF8       | ENSG00000140968 | IRF        | ENSP00000455784;  | 3394      |
| Homo_sapiens | ZNF705D    | ENSG00000215343 | zf-C2H2    | ENSP00000445477;  | 728957    |
| Homo_sapiens | MXD3       | ENSG00000213347 | bHLH       | ENSP00000425029;  | 83463     |
| Homo_sapiens | ZNF506     | ENSG00000081665 | zf-C2H2    | ENSP00000440625;  | 440515    |
| Homo_sapiens | RHOXF2     | ENSG00000131721 | Homeobox   | ENSP00000360441;  | 84528     |
| Homo_sapiens | NHLH2      | ENSG00000177551 | bHLH       | ENSP00000322087;  | 4808      |
| Homo_sapiens | STAT5B     | ENSG00000173757 | STAT       | ENSP00000293328;  | 6777      |
| Homo_sapiens | ZNF490     | ENSG00000188033 | zf-C2H2    | ENSP00000311521;  | 57474     |
| Homo_sapiens | ZNF516     | ENSG00000101493 | zf-C2H2    | ENSP00000478712;  | 9658      |
| Homo_sapiens | NFKB2      | ENSG00000077150 | RHD        | ENSP00000410256;  | 4791      |
| Homo_sapiens | ZNF99      | ENSG00000213973 | zf-C2H2    | ENSP00000380293;  | 7652      |
| Homo_sapiens | ESR1       | ENSG00000091831 | ESR-like   | ENSP00000384064;  | 2099      |
| Homo_sapiens | DMRTA2     | ENSG00000142700 | DM         | ENSP00000383909;  | 63950     |
| Homo_sapiens | INSM1      | ENSG00000173404 | zf-C2H2    | ENSP00000312631;  | 3642      |
| Homo_sapiens | SOX5       | ENSG00000134532 | HMG        | ENSP00000439832;  | 6660      |
| Homo_sapiens | TBX18      | ENSG00000112837 | T-box      | ENSP00000358677;  | 9096      |
| Homo_sapiens | HNF4G      | ENSG00000164749 | RXR-like   | ENSP00000346339;  | 3174      |
| Homo_sapiens | ATF1       | ENSG00000123268 | TF_bZIP    | ENSP00000262053;  | 466       |
| Homo_sapiens | SCRT2      | ENSG00000215397 | zf-C2H2    | ENSP00000246104;  | 85508     |
| Homo_sapiens | NKX1-2     | ENSG00000229544 | Homeobox   | ENSP00000451945;  | 390010    |
| Homo_sapiens | ZNF384     | ENSG00000126746 | zf-C2H2    | ENSP00000473311;  | 171017    |
| Homo_sapiens | PLAGL2     | ENSG00000126003 | zf-C2H2    | ENSP00000246229;  | 5326      |
| Homo_sapiens | POU4F2     | ENSG00000151615 | Pou        | ENSP00000281321;  | 5458      |
| Homo_sapiens | NANOG      | ENSG00000111704 | Homeobox   | ENSP00000435288;  | 79923     |
| Homo_sapiens | ZNF81      | ENSG00000197779 | zf-C2H2    | ENSP00000341151;  | 347344    |

|              |            |                 |               |                   |        |
|--------------|------------|-----------------|---------------|-------------------|--------|
| Homo_sapiens | ZNF497     | ENSG00000174586 | zf-C2H2       | ENSP00000311183;  | 162968 |
| Homo_sapiens | NR0B2      | ENSG00000131910 | Miscellaneous | ENSP00000254227;  | 8431   |
| Homo_sapiens | AC010487.3 | ENSG00000283088 | zf-C2H2       | ENSP00000489045;- |        |
| Homo_sapiens | AC004080.3 | ENSG00000257184 | Homeobox      | ENSP00000421799;- |        |
| Homo_sapiens | ZNF135     | ENSG00000176293 | zf-C2H2       | ENSP00000321406;  | 7694   |
| Homo_sapiens | RELB       | ENSG00000104856 | RHD           | ENSP00000423287;  | 5971   |
| Homo_sapiens | GTF2IRD1   | ENSG00000006704 | GTF2I         | ENSP00000265755;  | 9569   |
| Homo_sapiens | CUX1       | ENSG00000257923 | CUT           | ENSP00000451558;  | 1523   |
| Homo_sapiens | ZNF207     | ENSG0000010244  | Others        | -                 | 7756   |
| Homo_sapiens | LTF        | ENSG0000012223  | Others        | -                 | 4057   |
| Homo_sapiens | PRDM11     | ENSG0000019485  | Others        | -                 | 56981  |
| Homo_sapiens | BCLAF1     | ENSG0000029363  | Others        | -                 | 9774   |
| Homo_sapiens | TFB1M      | ENSG0000029639  | Others        | -                 | 51106  |
| Homo_sapiens | ZNF280C    | ENSG0000056277  | Others        | -                 | 55609  |
| Homo_sapiens | PARP12     | ENSG0000059378  | Others        | -                 | 64761  |
| Homo_sapiens | GPBP1      | ENSG0000062194  | Others        | -                 | 65056  |
| Homo_sapiens | RFXANK     | ENSG0000064490  | Others        | -                 | 8625   |
| Homo_sapiens | MLLT10     | ENSG0000078403  | Others        | -                 | 8028   |
| Homo_sapiens | KHSRP      | ENSG0000088247  | Others        | -                 | 8570   |
| Homo_sapiens | HIF1A      | ENSG00000100644 | Others        | -                 | 3091   |
| Homo_sapiens | ADNP2      | ENSG00000101544 | Others        | -                 | 22850  |
| Homo_sapiens | CENPT      | ENSG00000102901 | Others        | -                 | 80152  |
| Homo_sapiens | CAPN15     | ENSG00000103326 | Others        | -                 | 6650   |
| Homo_sapiens | GABPB1     | ENSG00000104064 | Others        | -                 | 2553   |
| Homo_sapiens | MYEF2      | ENSG00000104177 | Others        | -                 | 50804  |
| Homo_sapiens | TAX1BP1    | ENSG00000106052 | Others        | -                 | 8887   |
| Homo_sapiens | AKNA       | ENSG00000106948 | Others        | -                 | 80709  |
| Homo_sapiens | CREBL2     | ENSG00000111269 | Others        | -                 | 1389   |
| Homo_sapiens | CENPA      | ENSG00000115163 | Others        | -                 | 1058   |
| Homo_sapiens | CEBPZ      | ENSG00000115816 | Others        | -                 | 10153  |
| Homo_sapiens | PLEK       | ENSG00000115956 | Others        | -                 | 5341   |
| Homo_sapiens | EPAS1      | ENSG00000116016 | Others        | -                 | 2034   |
| Homo_sapiens | SFPQ       | ENSG00000116560 | Others        | -                 | 6421   |
| Homo_sapiens | GON4L      | ENSG00000116580 | Others        | -                 | 54856  |
| Homo_sapiens | PHTF1      | ENSG00000116793 | Others        | -                 | 10745  |
| Homo_sapiens | BLZF1      | ENSG00000117475 | Others        | -                 | 8548   |
| Homo_sapiens | ZNF706     | ENSG00000120963 | Others        | -                 | 51123  |
| Homo_sapiens | KIAA1549   | ENSG00000122778 | Others        | -                 | 57670  |
| Homo_sapiens | ZNFX1      | ENSG00000124201 | Others        | -                 | 57169  |
| Homo_sapiens | SLC2A4RG   | ENSG00000125520 | Others        | -                 | 56731  |
| Homo_sapiens | RBCK1      | ENSG00000125826 | Others        | -                 | 10616  |
| Homo_sapiens | YEATS4     | ENSG00000127337 | Others        | -                 | 8089   |
| Homo_sapiens | CASZ1      | ENSG00000130940 | Others        | -                 | 54897  |
| Homo_sapiens | CC2D1A     | ENSG00000132024 | Others        | -                 | 54862  |
| Homo_sapiens | ZNF414     | ENSG00000133250 | Others        | -                 | 84330  |
| Homo_sapiens | XPA        | ENSG00000136936 | Others        | -                 | 7507   |
| Homo_sapiens | TCF19      | ENSG00000137310 | Others        | -                 | 6941   |
| Homo_sapiens | ZNF280D    | ENSG00000137871 | Others        | -                 | 54816  |
| Homo_sapiens | PREB       | ENSG00000138073 | Others        | -                 | 10113  |
| Homo_sapiens | SMARCAL1   | ENSG00000138375 | Others        | -                 | 50485  |
| Homo_sapiens | CARF       | ENSG00000138380 | Others        | -                 | 79800  |
| Homo_sapiens | TCF25      | ENSG00000141002 | Others        | -                 | 22980  |
| Homo_sapiens | ZNF750     | ENSG00000141579 | Others        | -                 | 79755  |
| Homo_sapiens | GABPB2     | ENSG00000143458 | Others        | -                 | 126626 |
| Homo_sapiens | TMF1       | ENSG00000144747 | Others        | -                 | 7110   |
| Homo_sapiens | LYAR       | ENSG00000145220 | Others        | -                 | 55646  |
| Homo_sapiens | PURB       | ENSG00000146676 | Others        | -                 | 5814   |
| Homo_sapiens | CIZ1       | ENSG00000148337 | Others        | -                 | 25792  |

|              |          |                 |        |   |           |
|--------------|----------|-----------------|--------|---|-----------|
| Homo_sapiens | ANKRD30A | ENSG00000148513 | Others | - | 91074     |
| Homo_sapiens | THYN1    | ENSG00000151500 | Others | - | 29087     |
| Homo_sapiens | SETBP1   | ENSG00000152217 | Others | - | 26040     |
| Homo_sapiens | AHCTF1   | ENSG00000153207 | Others | - | 25909     |
| Homo_sapiens | ELMSAN1  | ENSG00000156030 | Others | - | 91748     |
| Homo_sapiens | GATAD1   | ENSG00000157259 | Others | - | 57798     |
| Homo_sapiens | SON      | ENSG00000159140 | Others | - | 6651      |
| Homo_sapiens | GPBP1L1  | ENSG00000159592 | Others | - | 60313     |
| Homo_sapiens | ZNF326   | ENSG00000162664 | Others | - | 284695    |
| Homo_sapiens | SPZ1     | ENSG00000164299 | Others | - | 84654     |
| Homo_sapiens | FAM170A  | ENSG00000164334 | Others | - | 340069    |
| Homo_sapiens | CREBRF   | ENSG00000164463 | Others | - | 153222    |
| Homo_sapiens | ZNF704   | ENSG00000164684 | Others | - | 619279    |
| Homo_sapiens | ZNF503   | ENSG00000165655 | Others | - | 84858     |
| Homo_sapiens | RAG1     | ENSG00000166349 | Others | - | 5896      |
| Homo_sapiens | PHB      | ENSG00000167085 | Others | - | 5245      |
| Homo_sapiens | TET2     | ENSG00000168769 | Others | - | 54790     |
| Homo_sapiens | ZNF608   | ENSG00000168916 | Others | - | 57507     |
| Homo_sapiens | ZNF280A  | ENSG00000169548 | Others | - | 129025    |
| Homo_sapiens | CENPX    | ENSG00000169689 | Others | - | 201254    |
| Homo_sapiens | CNBP     | ENSG00000169714 | Others | - | 7555      |
| Homo_sapiens | NFRKB    | ENSG00000170322 | Others | - | 4798      |
| Homo_sapiens | ZNF318   | ENSG00000171467 | Others | - | 24149     |
| Homo_sapiens | PURG     | ENSG00000172733 | Others | - | 29942     |
| Homo_sapiens | CENPS    | ENSG00000175279 | Others | - | 378708    |
| Homo_sapiens | MAF1     | ENSG00000179632 | Others | - | 84232     |
| Homo_sapiens | ZNF609   | ENSG00000180357 | Others | - | 23060     |
| Homo_sapiens | DMRTC1B  | ENSG00000184911 | Others | - | 728656    |
| Homo_sapiens | PURA     | ENSG00000185129 | Others | - | 5813      |
| Homo_sapiens | NKRF     | ENSG00000186416 | Others | - | 55922     |
| Homo_sapiens | ZNF395   | ENSG00000186918 | Others | - | 55893     |
| Homo_sapiens | PLSCR1   | ENSG00000188313 | Others | - | 5359      |
| Homo_sapiens | ZGPAT    | ENSG00000197114 | Others | - | 84619     |
| Homo_sapiens | ZNF720   | ENSG00000197302 | Others | - | 107983990 |
| Homo_sapiens | ZNF511   | ENSG00000198546 | Others | - | 118472    |
| Homo_sapiens | L3MBTL3  | ENSG00000198945 | Others | - | 84456     |
| Homo_sapiens | CPEB1    | ENSG00000214575 | Others | - | 64506     |
| Homo_sapiens | ZNF487   | ENSG00000243660 | Others | - | 642819    |
| Homo_sapiens | NME2     | ENSG00000243678 | Others | - | 4831      |
| Homo_sapiens | ZNF488   | ENSG00000265763 | Others | - | 118738    |
| Homo_sapiens | DMRTC1   | ENSG00000269502 | Others | - | 63947     |
| Homo_sapiens | ZNF280B  | ENSG00000275004 | Others | - | 140883    |

---

# Supplementary Table S2

|             | logFC      | AveExpr    | t          | P.Value    | adj.P.Val  | B           |
|-------------|------------|------------|------------|------------|------------|-------------|
| UBE2C       | 3.41201759 | 5.69188515 | 13.1558921 | 2.09E-33   | 1.04E-30   | 65.0950591  |
| KRT7        | 2.99528215 | 7.77560607 | 4.62730069 | 4.93E-06   | 6.61E-05   | 3.12567825  |
| MYBL2       | 2.98696919 | 4.7399194  | 9.79880447 | 1.41E-20   | 1.70E-18   | 35.8790683  |
| CDC20       | 2.90691209 | 4.98535065 | 10.7978791 | 3.47E-24   | 6.28E-22   | 44.0853203  |
| MMP11       | 2.87817019 | 3.53364566 | 6.10194629 | 2.36E-09   | 6.05E-08   | 10.5090196  |
| TK1         | 2.83528457 | 5.40374817 | 11.8790387 | 2.65E-28   | 7.46E-26   | 53.4632032  |
| KRT14       | 2.82330608 | 4.00942061 | 3.31270123 | 0.00100291 | 0.00744715 | -1.8904316  |
| TPX2        | 2.78243086 | 4.64698273 | 10.5052365 | 4.16E-23   | 6.56E-21   | 41.6326979  |
| SPP1        | 2.77415327 | 4.683812   | 5.54872524 | 5.07E-08   | 1.01E-06   | 7.53232612  |
| TOP2A       | 2.60362192 | 4.46344767 | 10.0003031 | 2.74E-21   | 3.62E-19   | 37.4952084  |
| CTA-384D8.3 | 2.59271794 | 3.59122075 | 4.23199221 | 2.84E-05   | 0.00031835 | 1.45590268  |
| KRT18       | 2.53765367 | 7.80134447 | 7.39945039 | 7.36E-13   | 3.24E-11   | 18.3936627  |
| CST6        | 2.53684035 | 3.61715955 | 5.06915002 | 5.97E-07   | 9.76E-06   | 5.15061659  |
| BIRC5       | 2.41413664 | 3.94495541 | 10.1326329 | 9.26E-22   | 1.31E-19   | 38.5676133  |
| CST1        | 2.39745323 | 2.48820586 | 4.53989961 | 7.34E-06   | 9.45E-05   | 2.74482932  |
| ZWINT       | 2.38578128 | 4.21119272 | 11.097946  | 2.62E-25   | 5.41E-23   | 46.6396248  |
| AURKB       | 2.38156219 | 3.74042219 | 10.3293248 | 1.81E-22   | 2.71E-20   | 40.177389   |
| CDK1        | 2.3808824  | 3.73424012 | 11.7185635 | 1.11E-27   | 2.89E-25   | 52.0417095  |
| CCNB1       | 2.30963398 | 4.57278224 | 10.0582046 | 1.71E-21   | 2.31E-19   | 37.9633797  |
| ASF1B       | 2.30527388 | 3.89071965 | 10.992479  | 6.53E-25   | 1.31E-22   | 45.7374004  |
| SERINC2     | 2.30324382 | 6.72402727 | 6.54334255 | 1.73E-10   | 5.39E-09   | 13.0533079  |
| KLHDC7B     | 2.27314281 | 3.34597977 | 4.07088421 | 5.58E-05   | 0.00058625 | 0.81462697  |
| KIF2C       | 2.27087414 | 3.55176954 | 10.597372  | 1.91E-23   | 3.14E-21   | 42.4006788  |
| CDCA8       | 2.26464366 | 3.56337012 | 10.5027292 | 4.25E-23   | 6.68E-21   | 41.6118531  |
| NUSAP1      | 2.25172744 | 4.00001124 | 9.66955673 | 3.99E-20   | 4.53E-18   | 34.853336   |
| ISG15       | 2.22431253 | 6.86239597 | 6.34699854 | 5.63E-10   | 1.58E-08   | 11.9034099  |
| PRSS8       | 2.22427748 | 4.31630934 | 5.9673207  | 5.08E-09   | 1.23E-07   | 9.76256505  |
| SPINT1      | 2.17960335 | 6.39139929 | 7.63739071 | 1.48E-13   | 7.22E-12   | 19.9684247  |
| EPCAM       | 2.17727153 | 5.35004048 | 6.08046491 | 2.67E-09   | 6.78E-08   | 10.388974   |
| RRM2        | 2.17022243 | 3.93334992 | 8.44489009 | 4.85E-16   | 3.35E-14   | 25.5875399  |
| SFN         | 2.15805738 | 8.39886302 | 5.00617118 | 8.15E-07   | 1.30E-05   | 4.85193701  |
| FOXM1       | 2.15701092 | 3.39883057 | 8.55717199 | 2.12E-16   | 1.56E-14   | 26.4010892  |
| CCNB2       | 2.15426701 | 3.73599765 | 9.862037   | 8.46E-21   | 1.05E-18   | 36.3840189  |
| S100A14     | 2.14455983 | 6.32715958 | 3.73715183 | 0.00021151 | 0.00191944 | -0.44021046 |
| TROAP       | 2.1327216  | 2.85833564 | 10.54932   | 2.87E-23   | 4.66E-21   | 41.9996611  |
| KRT19       | 2.12948103 | 9.58676784 | 4.36695568 | 1.58E-05   | 0.0001888  | 2.01069627  |
| HIST1H1C    | 2.12658207 | 6.16201933 | 6.33677257 | 5.98E-10   | 1.67E-08   | 11.8443118  |
| PYCR1       | 2.12563648 | 3.82934531 | 6.67329301 | 7.81E-11   | 2.56E-09   | 13.8300827  |
| CDT1        | 2.12522507 | 3.31397669 | 10.0198333 | 2.34E-21   | 3.12E-19   | 37.6529371  |
| KIF20A      | 2.12020545 | 3.1928401  | 9.81370304 | 1.25E-20   | 1.52E-18   | 35.9978588  |
| AURKA       | 2.11408281 | 3.39357519 | 10.1173373 | 1.05E-21   | 1.47E-19   | 38.4432163  |
| KIFC1       | 2.11352645 | 3.68551018 | 9.42122581 | 2.87E-19   | 2.96E-17   | 32.9071051  |
| MELK        | 2.09260053 | 3.09147729 | 8.59225683 | 1.63E-16   | 1.22E-14   | 26.6568545  |
| HIST1H2BD   | 2.09082011 | 4.13344145 | 7.34996317 | 1.02E-12   | 4.41E-11   | 18.070954   |
| PAFAH1B3    | 2.08690356 | 5.42538381 | 9.68901913 | 3.42E-20   | 3.93E-18   | 35.0072398  |
| APOC1       | 2.08316513 | 4.36178864 | 6.1326947  | 1.98E-09   | 5.11E-08   | 10.68147    |
| CA9         | 2.07335664 | 2.75317949 | 4.19382711 | 3.34E-05   | 0.0003689  | 1.30191817  |
| HIST3H2A    | 2.06457129 | 4.02809672 | 7.8327977  | 3.84E-14   | 2.04E-12   | 21.2898638  |
| RECQL4      | 2.0573617  | 3.3910884  | 10.2516012 | 3.46E-22   | 5.07E-20   | 39.5390523  |
| CKS2        | 2.045763   | 5.91629931 | 9.68563095 | 3.51E-20   | 4.01E-18   | 34.9804327  |
| TMEM132A    | 2.04255287 | 3.39448731 | 9.28675554 | 8.25E-19   | 8.01E-17   | 31.8670222  |
| UBE2T       | 2.03949576 | 4.28411362 | 10.5267647 | 3.47E-23   | 5.54E-21   | 41.811792   |
| PLK1        | 2.03867454 | 3.28639667 | 8.94265086 | 1.17E-17   | 9.78E-16   | 29.251018   |
| CEP55       | 2.02949613 | 3.26927572 | 9.21060471 | 1.49E-18   | 1.39E-16   | 31.2824048  |
| MKI67       | 2.02582861 | 3.18431458 | 9.22851647 | 1.30E-18   | 1.22E-16   | 31.4196277  |
| CDCA5       | 2.02385925 | 3.26088908 | 8.9170647  | 1.42E-17   | 1.18E-15   | 29.0591744  |
| HMGB3       | 2.00558731 | 4.52578864 | 10.5418133 | 3.06E-23   | 4.94E-21   | 41.9371098  |

|           |            |            |            |            |            |             |
|-----------|------------|------------|------------|------------|------------|-------------|
| C4orf48   | 2.005197   | 3.33754435 | 7.21232127 | 2.54E-12   | 1.03E-10   | 17.1822261  |
| CCNA2     | 1.99954465 | 3.5273234  | 9.08207796 | 4.03E-18   | 3.49E-16   | 30.3029877  |
| IQGAP3    | 1.99179777 | 2.67272213 | 9.54658033 | 1.06E-19   | 1.16E-17   | 33.8854554  |
| LSR       | 1.98404166 | 6.45499072 | 7.20572545 | 2.65E-12   | 1.07E-10   | 17.1399668  |
| PTTG1     | 1.9828727  | 4.17919299 | 8.5427951  | 2.36E-16   | 1.72E-14   | 26.296496   |
| KIF18B    | 1.97502167 | 2.52160182 | 9.95908861 | 3.84E-21   | 4.98E-19   | 37.1629793  |
| SAPCD2    | 1.94937662 | 2.85269191 | 8.0675537  | 7.38E-15   | 4.41E-13   | 22.9102117  |
| CDH3      | 1.9368922  | 3.84567192 | 4.48355359 | 9.45E-06   | 0.00011867 | 2.50279583  |
| SNORD104  | 1.93070685 | 4.46366753 | 6.97706793 | 1.16E-11   | 4.30E-10   | 15.6937823  |
| NUF2      | 1.9306937  | 2.69914794 | 8.76092209 | 4.64E-17   | 3.63E-15   | 27.8966147  |
| TACSTD2   | 1.92946247 | 8.11063097 | 4.87603991 | 1.53E-06   | 2.30E-05   | 4.24531481  |
| ETV4      | 1.92859548 | 3.01040846 | 6.55809805 | 1.58E-10   | 4.96E-09   | 13.1408826  |
| TACC3     | 1.92733815 | 3.80973568 | 9.46359689 | 2.06E-19   | 2.17E-17   | 33.2368573  |
| HN1       | 1.92305579 | 5.93808036 | 10.6949728 | 8.35E-24   | 1.45E-21   | 43.2184477  |
| NEK2      | 1.91845068 | 2.72794147 | 9.3336896  | 5.71E-19   | 5.66E-17   | 32.2289245  |
| SPAG5     | 1.90415472 | 3.18324464 | 9.70537924 | 2.99E-20   | 3.48E-18   | 35.1367639  |
| RAC3      | 1.89853858 | 2.98851185 | 7.54481038 | 2.77E-13   | 1.29E-11   | 19.3511767  |
| SDC1      | 1.89390571 | 8.14095091 | 5.13275    | 4.35E-07   | 7.29E-06   | 5.45559536  |
| HJURP     | 1.89074704 | 2.66231666 | 10.0936576 | 1.28E-21   | 1.77E-19   | 38.2508589  |
| ST14      | 1.8896653  | 5.94149269 | 6.95231167 | 1.36E-11   | 4.98E-10   | 15.5394203  |
| CDC45     | 1.88791547 | 2.88258688 | 9.32473656 | 6.13E-19   | 6.06E-17   | 32.1597959  |
| LAMC2     | 1.88596128 | 4.06600146 | 3.98723559 | 7.87E-05   | 0.0007973  | 0.4907473   |
| STMN1     | 1.88349492 | 5.32496986 | 7.89791313 | 2.44E-14   | 1.34E-12   | 21.7357523  |
| KIF4A     | 1.88009359 | 2.765584   | 9.1580435  | 2.24E-18   | 2.01E-16   | 30.8807574  |
| CENPA     | 1.87454026 | 2.51307973 | 8.77763645 | 4.09E-17   | 3.23E-15   | 28.0203844  |
| ESM1      | 1.87417861 | 2.05435366 | 6.72121385 | 5.81E-11   | 1.93E-09   | 14.1196511  |
| KRT16     | 1.87382735 | 4.58879711 | 2.6143939  | 0.00925578 | 0.04814837 | -3.91290693 |
| AP1M2     | 1.86949612 | 5.2515032  | 6.42369191 | 3.56E-10   | 1.04E-08   | 12.3491421  |
| E2F1      | 1.85959409 | 3.54443081 | 7.34399534 | 1.06E-12   | 4.57E-11   | 18.0321506  |
| CASP14    | 1.85897303 | 2.21544267 | 3.1403308  | 0.00180525 | 0.01228042 | -2.4320597  |
| CDKN2A    | 1.8464782  | 2.50419111 | 3.67808119 | 0.00026511 | 0.00234457 | -0.65187669 |
| MMP1      | 1.8447656  | 3.72922231 | 3.29401181 | 0.00107023 | 0.00787297 | -1.95048823 |
| NCAPH     | 1.84405071 | 2.79740559 | 8.96154129 | 1.02E-17   | 8.53E-16   | 29.392898   |
| GJB2      | 1.83952836 | 5.14219576 | 3.5329967  | 0.00045586 | 0.00377051 | -1.15830047 |
| VGLL1     | 1.82762242 | 4.37864676 | 3.53004273 | 0.00046083 | 0.00380679 | -1.16841208 |
| LAD1      | 1.81687594 | 6.22003246 | 5.27409762 | 2.13E-07   | 3.79E-06   | 6.14538471  |
| HIST1H2AE | 1.81636601 | 2.47848491 | 5.66290719 | 2.74E-08   | 5.79E-07   | 8.12689649  |
| TRIP13    | 1.81483794 | 2.98287871 | 7.7537145  | 6.65E-14   | 3.38E-12   | 20.752041   |
| AGRN      | 1.80933809 | 5.37552354 | 8.87263112 | 2.00E-17   | 1.64E-15   | 28.7269076  |
| COL7A1    | 1.80820583 | 3.71752267 | 4.85851754 | 1.67E-06   | 2.48E-05   | 4.16472169  |
| CDC6      | 1.80570193 | 2.89472716 | 9.46083431 | 2.10E-19   | 2.20E-17   | 33.2153282  |
| KIAA0101  | 1.8047584  | 3.01728652 | 9.22878575 | 1.30E-18   | 1.22E-16   | 31.421692   |
| MCM2      | 1.80434762 | 4.03000423 | 7.95541743 | 1.63E-14   | 9.19E-13   | 22.1318012  |
| CENPF     | 1.80135448 | 2.82025226 | 8.41021114 | 6.25E-16   | 4.23E-14   | 25.3378137  |
| IGFL1     | 1.79744427 | 3.07707714 | 2.74741247 | 0.00626193 | 0.03501726 | -3.56301138 |
| DLGAP5    | 1.79367755 | 2.76039632 | 8.19425535 | 2.99E-15   | 1.87E-13   | 23.7993209  |
| H2AFX     | 1.78681303 | 5.61297606 | 9.53237446 | 1.19E-19   | 1.30E-17   | 33.7741624  |
| CLIC3     | 1.78676916 | 4.01407917 | 3.55020611 | 0.00042787 | 0.00356939 | -1.09923298 |
| SCD       | 1.78636782 | 5.68022843 | 5.26921073 | 2.18E-07   | 3.88E-06   | 6.12126156  |
| IFI6      | 1.7859501  | 7.26083927 | 3.91456625 | 0.00010544 | 0.00103517 | 0.21444448  |
| C15orf48  | 1.78456333 | 3.67973333 | 4.04094358 | 6.32E-05   | 0.00065414 | 0.69798418  |
| FAM83H    | 1.7836104  | 5.13332032 | 8.0047249  | 1.15E-14   | 6.66E-13   | 22.4730876  |
| CDH1      | 1.77810428 | 5.95014884 | 5.0366188  | 7.01E-07   | 1.13E-05   | 4.99592252  |
| CCNE1     | 1.77203    | 3.15456851 | 7.35352233 | 9.99E-13   | 4.32E-11   | 18.0941076  |
| KRT17     | 1.76836343 | 8.36299855 | 2.77125288 | 0.00582893 | 0.03296528 | -3.4985296  |
| UHRF1     | 1.76825077 | 2.4710297  | 9.59211067 | 7.41E-20   | 8.20E-18   | 34.2428728  |
| LMNB1     | 1.76812022 | 4.11934182 | 8.37957653 | 7.81E-16   | 5.23E-14   | 25.1178213  |
| PABPC1L   | 1.76322093 | 2.99394909 | 7.32906789 | 1.18E-12   | 5.02E-11   | 17.9351977  |

|             |            |            |            |            |            |             |
|-------------|------------|------------|------------|------------|------------|-------------|
| RAB25       | 1.76258948 | 6.2043699  | 4.87515137 | 1.54E-06   | 2.31E-05   | 4.2412218   |
| FXYD3       | 1.76106793 | 6.88042788 | 3.89624398 | 0.00011344 | 0.00110462 | 0.1455256   |
| CENPM       | 1.75786825 | 3.09768676 | 8.95471603 | 1.07E-17   | 8.95E-16   | 29.3416121  |
| HIST1H2BH   | 1.7552093  | 2.23099744 | 5.41203219 | 1.04E-07   | 1.96E-06   | 6.83433052  |
| SNORD99     | 1.75495501 | 3.22039247 | 7.72560784 | 8.07E-14   | 4.04E-12   | 20.5618824  |
| MAL2        | 1.75484725 | 5.70067211 | 4.6876607  | 3.73E-06   | 5.13E-05   | 3.3925262   |
| MARCKSL1    | 1.75424122 | 6.93987682 | 6.71355799 | 6.09E-11   | 2.02E-09   | 14.0732771  |
| MIR4653     | 1.74628549 | 2.75661451 | 6.99612902 | 1.03E-11   | 3.83E-10   | 15.81293    |
| GRB7        | 1.74092877 | 4.16202048 | 5.77128973 | 1.52E-08   | 3.36E-07   | 8.70088158  |
| SPC24       | 1.74032515 | 2.8253812  | 9.11289389 | 3.18E-18   | 2.78E-16   | 30.5369743  |
| PKP3        | 1.74007399 | 4.90980427 | 6.06797504 | 2.87E-09   | 7.24E-08   | 10.3193394  |
| PVRL4       | 1.73805055 | 5.39048467 | 4.51029907 | 8.38E-06   | 0.00010665 | 2.61733834  |
| ANLN        | 1.73328115 | 3.2115664  | 6.83775326 | 2.80E-11   | 9.77E-10   | 14.8308157  |
| RASSF7      | 1.73197608 | 4.57622298 | 7.59396792 | 1.99E-13   | 9.47E-12   | 19.6782054  |
| PRC1        | 1.72719543 | 3.28680361 | 8.25694362 | 1.90E-15   | 1.22E-13   | 24.2429468  |
| COL10A1     | 1.72685084 | 1.72432755 | 4.37041315 | 1.56E-05   | 0.00018638 | 2.02511821  |
| C19orf33    | 1.72384122 | 6.75079408 | 4.1449272  | 4.10E-05   | 0.00044483 | 1.1064992   |
| CTD-2510F5. | 1.72307611 | 2.88144797 | 6.69255543 | 6.94E-11   | 2.29E-09   | 13.9462772  |
| KPNA2       | 1.72295558 | 5.54558526 | 7.93389532 | 1.90E-14   | 1.06E-12   | 21.9833228  |
| MEX3A       | 1.71830784 | 2.44082528 | 5.73901437 | 1.81E-08   | 3.95E-07   | 8.52897984  |
| GIN51       | 1.715451   | 2.74579964 | 9.19762031 | 1.65E-18   | 1.52E-16   | 31.1830417  |
| HMG1A1      | 1.71238062 | 6.9974225  | 7.21565098 | 2.48E-12   | 1.01E-10   | 17.2035709  |
| SOX4        | 1.70838328 | 4.9751251  | 6.73301913 | 5.40E-11   | 1.80E-09   | 14.191243   |
| PLAU        | 1.70684499 | 5.32835488 | 4.51723825 | 8.13E-06   | 0.00010375 | 2.64715778  |
| MDK         | 1.69697787 | 6.72464671 | 5.2566787  | 2.33E-07   | 4.11E-06   | 6.05948933  |
| IER5L       | 1.6947148  | 3.25359932 | 8.19800192 | 2.91E-15   | 1.82E-13   | 23.8257653  |
| PODXL2      | 1.68874383 | 3.97047693 | 4.66950139 | 4.05E-06   | 5.54E-05   | 3.31191683  |
| GGH         | 1.68835338 | 3.64747038 | 6.32043169 | 6.59E-10   | 1.83E-08   | 11.7500378  |
| HILPDA      | 1.68622962 | 4.16249659 | 6.09957913 | 2.39E-09   | 6.12E-08   | 10.4957737  |
| GJB6        | 1.68323204 | 4.2092857  | 3.40507932 | 0.00072423 | 0.00562455 | -1.58885126 |
| SLC39A4     | 1.67918779 | 3.13262496 | 8.17752222 | 3.37E-15   | 2.10E-13   | 23.6813203  |
| C1QTNF6     | 1.67717302 | 2.74681776 | 6.52212537 | 1.97E-10   | 6.07E-09   | 12.9276653  |
| CXCL10      | 1.67454649 | 3.70143421 | 3.02978812 | 0.00259643 | 0.01678824 | -2.76486999 |
| KIF11       | 1.67439903 | 3.04650143 | 8.5001988  | 3.23E-16   | 2.30E-14   | 25.9873335  |
| PRR11       | 1.66981997 | 2.7080168  | 7.99766563 | 1.21E-14   | 6.96E-13   | 22.4241307  |
| SKA3        | 1.66364123 | 2.39393104 | 9.6882481  | 3.44E-20   | 3.95E-18   | 35.001139   |
| BUB1B       | 1.66310888 | 2.48393428 | 8.76046227 | 4.66E-17   | 3.63E-15   | 27.8932121  |
| GTSE1       | 1.6616768  | 2.30521071 | 9.34905406 | 5.06E-19   | 5.04E-17   | 32.3476589  |
| CD24        | 1.66056337 | 6.75697305 | 4.06552146 | 5.71E-05   | 0.00059766 | 0.79367619  |
| FER1L4      | 1.65862991 | 3.61191303 | 3.40954425 | 0.00071279 | 0.00555788 | -1.57407585 |
| NDC80       | 1.65794048 | 2.74888279 | 7.92681777 | 1.99E-14   | 1.11E-12   | 21.9345607  |
| TYMS        | 1.65565162 | 3.96284547 | 6.78928145 | 3.80E-11   | 1.30E-09   | 14.53383    |
| FEN1        | 1.64702981 | 4.44487123 | 7.89334655 | 2.52E-14   | 1.38E-12   | 21.7043923  |
| SQLE        | 1.64576628 | 4.10349767 | 7.23476461 | 2.19E-12   | 9.03E-11   | 17.3262461  |
| ESRP1       | 1.63914569 | 4.70936791 | 5.89223779 | 7.75E-09   | 1.80E-07   | 9.35236671  |
| PKMYT1      | 1.63803925 | 2.39588726 | 8.57482756 | 1.86E-16   | 1.38E-14   | 26.5297047  |
| TTK         | 1.63727086 | 2.26844463 | 8.90639489 | 1.55E-17   | 1.28E-15   | 28.9792837  |
| CDCA3       | 1.63632424 | 2.34067549 | 9.28443161 | 8.40E-19   | 8.13E-17   | 31.849134   |
| SKA1        | 1.63305751 | 2.3351431  | 8.82076587 | 2.96E-17   | 2.38E-15   | 28.3405101  |
| GATA3       | 1.63247475 | 5.40780509 | 3.31840399 | 0.00098317 | 0.00731728 | -1.87204209 |
| EIF4EBP1    | 1.62440814 | 5.77869568 | 7.09792097 | 5.34E-12   | 2.07E-10   | 16.4535636  |
| DHCR24      | 1.62437442 | 5.65028288 | 4.77933122 | 2.43E-06   | 3.48E-05   | 3.80375001  |
| RNASEH2A    | 1.62230208 | 4.36256456 | 9.75214011 | 2.06E-20   | 2.43E-18   | 35.5077371  |
| YDJC        | 1.61561173 | 4.25993009 | 9.48169076 | 1.78E-19   | 1.89E-17   | 33.3779659  |
| HIST1H2BK   | 1.61501001 | 5.50615822 | 5.00339204 | 8.26E-07   | 1.31E-05   | 4.83883315  |
| NCAPG       | 1.61408739 | 2.36915118 | 8.42519314 | 5.60E-16   | 3.81E-14   | 25.4456106  |
| BUB1        | 1.61293623 | 2.64520794 | 8.50828204 | 3.04E-16   | 2.18E-14   | 26.0459173  |
| SLC52A2     | 1.61103822 | 5.09899024 | 11.3038335 | 4.36E-26   | 9.67E-24   | 48.414419   |



|            |            |            |            |            |            |             |
|------------|------------|------------|------------|------------|------------|-------------|
| PBK        | 1.60866929 | 2.67478278 | 7.3483521  | 1.03E-12   | 4.46E-11   | 18.0604763  |
| NME1       | 1.60583981 | 4.57252755 | 10.9206456 | 1.21E-24   | 2.35E-22   | 45.1256355  |
| SNORD14E   | 1.60511187 | 2.35996309 | 5.27891745 | 2.08E-07   | 3.71E-06   | 6.16919603  |
| PPP1R14BP3 | 1.6050794  | 5.52590015 | 9.1312684  | 2.76E-18   | 2.43E-16   | 30.6767461  |
| HMMR       | 1.6035817  | 2.39701261 | 8.01165288 | 1.10E-14   | 6.36E-13   | 22.5211648  |
| CBLC       | 1.60207647 | 4.88851776 | 4.59843736 | 5.62E-06   | 7.44E-05   | 2.99917977  |
| CENPU      | 1.59543512 | 3.04802622 | 7.98449137 | 1.33E-14   | 7.58E-13   | 22.3328509  |
| FAM64A     | 1.59527891 | 2.24648285 | 7.19810831 | 2.78E-12   | 1.12E-10   | 17.0912016  |
| RHPN1      | 1.59510935 | 2.917166   | 5.3285495  | 1.61E-07   | 2.93E-06   | 6.41550011  |
| GRIN2D     | 1.59419738 | 1.91632838 | 5.0179279  | 7.69E-07   | 1.23E-05   | 4.90744218  |
| PSORS1C2   | 1.58909685 | 2.03285002 | 3.04645824 | 0.00245962 | 0.01603863 | -2.71541178 |
| ULBP2      | 1.58585418 | 2.23416671 | 6.07309648 | 2.78E-09   | 7.04E-08   | 10.3478784  |
| SLC5A6     | 1.58123409 | 3.66680319 | 8.20883574 | 2.69E-15   | 1.70E-13   | 23.9022832  |
| IGSF9      | 1.57973398 | 2.78175943 | 5.5928917  | 4.00E-08   | 8.15E-07   | 7.76107239  |
| UBE2S      | 1.57624657 | 4.08760374 | 7.82824054 | 3.97E-14   | 2.10E-12   | 21.2587609  |
| MEST       | 1.57262312 | 3.17138807 | 4.54545234 | 7.15E-06   | 9.25E-05   | 2.7688295   |
| TLCD1      | 1.57126577 | 3.83349475 | 6.63178727 | 1.01E-10   | 3.26E-09   | 13.5806347  |
| RCC1       | 1.57069546 | 4.51769721 | 10.7089494 | 7.42E-24   | 1.30E-21   | 43.3359072  |
| CKS1B      | 1.56633258 | 3.90561701 | 8.02151622 | 1.02E-14   | 5.98E-13   | 22.5896651  |
| C19orf48   | 1.56361077 | 4.67474058 | 9.41586487 | 3.00E-19   | 3.07E-17   | 32.8654525  |
| KIF23      | 1.56255574 | 2.45992331 | 8.46511938 | 4.18E-16   | 2.92E-14   | 25.7335504  |
| PCNA       | 1.55898425 | 6.6358789  | 8.00792689 | 1.13E-14   | 6.52E-13   | 22.4953042  |
| PPP1R14B   | 1.55577377 | 6.22784037 | 10.0644905 | 1.62E-21   | 2.21E-19   | 38.0143054  |
| GINS2      | 1.55455591 | 2.79926634 | 8.2904751  | 1.49E-15   | 9.65E-14   | 24.4812415  |
| U47924.27  | 1.55454565 | 3.97099427 | 4.65918549 | 4.25E-06   | 5.79E-05   | 3.26625015  |
| CDKN3      | 1.55325842 | 2.83858268 | 7.11307934 | 4.84E-12   | 1.89E-10   | 16.5495878  |
| FAM83H-AS  | 1.5511262  | 3.89145736 | 5.47081907 | 7.66E-08   | 1.48E-06   | 7.13266248  |
| EVPL       | 1.54340614 | 4.82171849 | 4.45180775 | 1.09E-05   | 0.00013482 | 2.3676427   |
| FBXL6      | 1.54300839 | 3.42769687 | 10.3443009 | 1.60E-22   | 2.40E-20   | 40.3007181  |
| TTYH3      | 1.54185612 | 4.43511096 | 9.05219623 | 5.07E-18   | 4.34E-16   | 30.0766046  |
| ECT2       | 1.53887439 | 3.04050054 | 7.26523956 | 1.79E-12   | 7.53E-11   | 17.5223635  |
| POC1A      | 1.5374829  | 3.09451337 | 8.45113446 | 4.63E-16   | 3.21E-14   | 25.6325839  |
| KDF1       | 1.53650925 | 3.93308916 | 6.83231122 | 2.90E-11   | 1.01E-09   | 14.797388   |
| MIR4477B   | 1.53523677 | 3.02763988 | 5.82860596 | 1.11E-08   | 2.51E-07   | 9.00818073  |
| SKP2       | 1.5349609  | 3.51757671 | 7.73436601 | 7.60E-14   | 3.84E-12   | 20.6210811  |
| PSMG3      | 1.53481695 | 4.73187822 | 10.7783159 | 4.11E-24   | 7.36E-22   | 43.9201579  |
| PAQR4      | 1.53303974 | 2.51671529 | 7.46974329 | 4.60E-13   | 2.08E-11   | 18.8549117  |
| EFNA4      | 1.53062967 | 3.91458715 | 8.78653528 | 3.83E-17   | 3.03E-15   | 28.0863467  |
| KRT8       | 1.52715276 | 7.9509705  | 3.97097158 | 8.40E-05   | 0.00084548 | 0.42849851  |
| RAD51      | 1.52580816 | 2.45567386 | 9.37206747 | 4.23E-19   | 4.23E-17   | 32.5257433  |
| FAM110A    | 1.52421127 | 4.02992696 | 9.03211145 | 5.92E-18   | 5.05E-16   | 29.9247262  |
| DHCR7      | 1.52373393 | 4.11466963 | 7.68752079 | 1.05E-13   | 5.20E-12   | 20.3050304  |
| C16orf59   | 1.52172547 | 2.0437409  | 9.39296706 | 3.59E-19   | 3.64E-17   | 32.6877191  |
| MCM4       | 1.52126455 | 4.38330609 | 7.78204539 | 5.46E-14   | 2.83E-12   | 20.9442415  |
| MFSD3      | 1.52073224 | 3.77910467 | 8.23186247 | 2.28E-15   | 1.45E-13   | 24.0651613  |
| MAGEA3     | 1.51975122 | 1.87630064 | 2.90597703 | 0.0038522  | 0.02338514 | -3.12405695 |
| EZH2       | 1.51697349 | 2.77206348 | 8.02951266 | 9.67E-15   | 5.68E-13   | 22.6452454  |
| HIST1H2BJ  | 1.5140573  | 2.07437969 | 5.27283199 | 2.14E-07   | 3.81E-06   | 6.13913527  |
| SPC25      | 1.51298883 | 2.35353536 | 8.09651874 | 6.01E-15   | 3.63E-13   | 23.1125769  |
| TMC6       | 1.51006085 | 3.66187549 | 8.44143191 | 4.97E-16   | 3.42E-14   | 25.5626044  |
| PDIA4      | 1.50877151 | 6.55288052 | 9.24346135 | 1.16E-18   | 1.10E-16   | 31.5342567  |
| EFNA1      | 1.50697663 | 5.08771461 | 5.79395955 | 1.34E-08   | 2.99E-07   | 8.82211547  |
| SYNE4      | 1.50005585 | 2.41113795 | 5.10927575 | 4.89E-07   | 8.13E-06   | 5.34263872  |
| S100A11    | 1.49939878 | 10.6769907 | 6.50352848 | 2.20E-10   | 6.72E-09   | 12.8178136  |
| HIST1H2BG  | 1.4980427  | 1.9287166  | 4.88248065 | 1.48E-06   | 2.24E-05   | 4.27500379  |
| RAD54L     | 1.48906766 | 2.10023763 | 8.48990675 | 3.48E-16   | 2.45E-14   | 25.9127982  |
| KIFC2      | 1.48538474 | 3.20656182 | 5.69529554 | 2.30E-08   | 4.91E-07   | 8.29744541  |
| HIST1H3D   | 1.48269777 | 1.87960738 | 5.72261496 | 1.98E-08   | 4.29E-07   | 8.44195103  |

|             |            |            |            |            |            |             |
|-------------|------------|------------|------------|------------|------------|-------------|
| TYMP        | 1.48186373 | 4.75863427 | 3.76575496 | 0.0001894  | 0.0017426  | -0.33658319 |
| RAD51AP1    | 1.4781889  | 2.43197009 | 7.31312918 | 1.31E-12   | 5.55E-11   | 17.8318454  |
| MAGEA6      | 1.47808323 | 1.71094866 | 3.00150055 | 0.00284466 | 0.01811835 | -2.848201   |
| TSTD1       | 1.47781129 | 5.27463366 | 5.3741246  | 1.27E-07   | 2.36E-06   | 6.64344517  |
| ADAM8       | 1.47405265 | 3.53070975 | 5.24210153 | 2.51E-07   | 4.40E-06   | 5.98779869  |
| RHOV        | 1.47360752 | 4.95626737 | 3.92836759 | 9.98E-05   | 0.00098497 | 0.26655653  |
| LRRC45      | 1.47329309 | 3.58062865 | 9.26342443 | 9.89E-19   | 9.50E-17   | 31.6875678  |
| OCIAD2      | 1.47113311 | 4.84987122 | 8.02373487 | 1.01E-14   | 5.90E-13   | 22.605082   |
| SPAG4       | 1.47075403 | 3.04018065 | 5.48733768 | 7.02E-08   | 1.37E-06   | 7.21699488  |
| NXP4        | 1.46471553 | 1.66820991 | 4.52821185 | 7.73E-06   | 9.91E-05   | 2.69439913  |
| TINAGL1     | 1.46332462 | 5.73895878 | 4.23664636 | 2.78E-05   | 0.00031299 | 1.47476848  |
| JUP         | 1.45634376 | 7.33286888 | 5.55773523 | 4.83E-08   | 9.71E-07   | 7.57886335  |
| FAM111B     | 1.44977125 | 2.1400243  | 6.5440142  | 1.72E-10   | 5.37E-09   | 13.0572907  |
| ORC6        | 1.44965762 | 2.0787163  | 8.68900613 | 7.95E-17   | 6.09E-15   | 27.3659468  |
| CHMP4C      | 1.44887946 | 3.77917396 | 6.24030145 | 1.06E-09   | 2.86E-08   | 11.2906714  |
| CKAP2L      | 1.44873336 | 1.94907582 | 7.71165169 | 8.88E-14   | 4.44E-12   | 20.4676537  |
| HIST1H3H    | 1.44528857 | 2.07383126 | 4.75968574 | 2.66E-06   | 3.79E-05   | 3.71501984  |
| RCC2        | 1.4452635  | 5.96843372 | 11.3669666 | 2.50E-26   | 5.69E-24   | 48.9621507  |
| FANCI       | 1.4447881  | 2.85552571 | 9.14330101 | 2.51E-18   | 2.24E-16   | 30.7683783  |
| RMI2        | 1.44240203 | 3.20319226 | 6.70624097 | 6.37E-11   | 2.11E-09   | 14.0289955  |
| SHMT2       | 1.44128454 | 4.77609471 | 9.67873623 | 3.71E-20   | 4.23E-18   | 34.9259006  |
| HIST1H4I    | 1.44028524 | 2.98476485 | 5.63071384 | 3.26E-08   | 6.76E-07   | 7.95820287  |
| FSCN1       | 1.43713517 | 5.80104167 | 4.25484647 | 2.57E-05   | 0.00029185 | 1.54872618  |
| PLA2G2F     | 1.43625586 | 2.68922426 | 2.87832877 | 0.00419934 | 0.02510268 | -3.2023013  |
| PSPHP1      | 1.435937   | 1.85174189 | 2.66152833 | 0.00807311 | 0.04296526 | -3.79084345 |
| SAC3D1      | 1.43576258 | 3.31027027 | 8.12792199 | 4.80E-15   | 2.92E-13   | 23.3325758  |
| TNNT1       | 1.4347333  | 1.63793747 | 3.97132416 | 8.39E-05   | 0.00084457 | 0.42984548  |
| UBALD2      | 1.4346103  | 5.9425674  | 8.17126728 | 3.52E-15   | 2.18E-13   | 23.6372561  |
| STAP2       | 1.43317167 | 4.64606548 | 5.72076121 | 2.00E-08   | 4.33E-07   | 8.43212691  |
| CLDN7       | 1.4317118  | 5.5456466  | 4.50188859 | 8.71E-06   | 0.00011032 | 2.58125217  |
| IFI27       | 1.4311838  | 5.178232   | 2.9058479  | 0.00385376 | 0.02339217 | -3.12442406 |
| MAPK13      | 1.42874173 | 4.08119557 | 7.40257981 | 7.21E-13   | 3.18E-11   | 18.414126   |
| CENPW       | 1.42829668 | 4.3505957  | 5.96062163 | 5.28E-09   | 1.27E-07   | 9.72578768  |
| CDCA4       | 1.42120367 | 3.70669276 | 7.90257117 | 2.36E-14   | 1.30E-12   | 21.7677542  |
| CNKSR1      | 1.42049254 | 3.49302133 | 6.57054416 | 1.47E-10   | 4.61E-09   | 13.2148759  |
| SMIM22      | 1.41959571 | 4.20659535 | 3.4187301  | 0.00068978 | 0.00540447 | -1.54362027 |
| TIMELESS    | 1.41951021 | 3.4203677  | 8.52435266 | 2.70E-16   | 1.96E-14   | 26.1625073  |
| WDR34       | 1.41944994 | 5.07414423 | 6.5569601  | 1.59E-10   | 4.98E-09   | 13.134123   |
| CHI3L1      | 1.41850048 | 2.90207524 | 2.96320921 | 0.00321534 | 0.02007205 | -2.95980791 |
| HGH1        | 1.4169772  | 4.00038267 | 10.9183404 | 1.24E-24   | 2.38E-22   | 45.1060403  |
| PCAT6       | 1.41252328 | 2.88099584 | 6.17943867 | 1.51E-09   | 3.98E-08   | 10.9450187  |
| DTL         | 1.40993954 | 2.1569477  | 7.99195365 | 1.26E-14   | 7.21E-13   | 22.3845407  |
| CHTF18      | 1.40924226 | 2.61770448 | 8.78759734 | 3.80E-17   | 3.01E-15   | 28.0942223  |
| MIR25       | 1.40769446 | 2.68828351 | 5.76205282 | 1.60E-08   | 3.51E-07   | 8.65160072  |
| HOXB7       | 1.40074785 | 4.07551675 | 6.17611716 | 1.54E-09   | 4.05E-08   | 10.9262364  |
| MDFI        | 1.40061969 | 4.0843067  | 4.34738253 | 1.73E-05   | 0.00020395 | 1.9292486   |
| FAM83A      | 1.39702896 | 3.08881673 | 2.8086255  | 0.00520445 | 0.03002391 | -3.39636599 |
| APOBEC3B    | 1.39005927 | 2.9158717  | 4.39725272 | 1.39E-05   | 0.00016743 | 2.13742717  |
| TONSL       | 1.3886326  | 2.5933305  | 9.23721581 | 1.21E-18   | 1.15E-16   | 31.4863376  |
| MFAP2       | 1.38501824 | 3.61014402 | 4.16780193 | 3.73E-05   | 0.00040791 | 1.19765079  |
| EPN3        | 1.38501483 | 3.6900074  | 4.41343817 | 1.29E-05   | 0.00015712 | 2.20545772  |
| RP11-783K1c | 1.38406223 | 2.46954771 | 6.18424471 | 1.47E-09   | 3.88E-08   | 10.9722106  |
| TRIB3       | 1.38166361 | 3.11854309 | 5.42227466 | 9.88E-08   | 1.87E-06   | 6.8861074   |
| LPAR2       | 1.38118117 | 3.66437308 | 7.44695333 | 5.36E-13   | 2.40E-11   | 18.705001   |
| CBX2        | 1.37869324 | 1.99759802 | 5.11905826 | 4.66E-07   | 7.77E-06   | 5.38965595  |
| CYB561      | 1.37663761 | 4.52636853 | 8.98360947 | 8.58E-18   | 7.26E-16   | 29.5589029  |
| FASN        | 1.37252192 | 5.27233835 | 6.08707522 | 2.57E-09   | 6.55E-08   | 10.4258769  |
| SPINT2      | 1.36924975 | 6.85836774 | 5.2391781  | 2.54E-07   | 4.45E-06   | 5.97344229  |

|             |            |            |            |            |            |             |
|-------------|------------|------------|------------|------------|------------|-------------|
| COMTD1      | 1.36864879 | 3.71509216 | 6.48414017 | 2.48E-10   | 7.47E-09   | 12.7035604  |
| OXLD1       | 1.36679324 | 4.23491199 | 9.07174586 | 4.37E-18   | 3.76E-16   | 30.2246552  |
| RP13-463N1c | 1.36470201 | 1.51259691 | 4.16808745 | 3.72E-05   | 0.00040757 | 1.19879145  |
| HIST1H2BC   | 1.36462016 | 2.06226709 | 4.71140551 | 3.34E-06   | 4.65E-05   | 3.49835502  |
| NMB         | 1.36049184 | 3.7934381  | 5.93048772 | 6.26E-09   | 1.48E-07   | 9.56078701  |
| SNHG1       | 1.35605931 | 3.87922741 | 8.49739566 | 3.30E-16   | 2.34E-14   | 25.9670267  |
| PPP1R14C    | 1.35519425 | 1.97891695 | 3.43742138 | 0.00064509 | 0.00509603 | -1.48141018 |
| DSP         | 1.35206133 | 4.85371384 | 3.15504207 | 0.00171864 | 0.01178463 | -2.38690981 |
| MOGS        | 1.35084157 | 5.02074525 | 11.7354158 | 9.58E-28   | 2.52E-25   | 52.1905278  |
| BCL2L12     | 1.35009153 | 3.70294896 | 8.81822711 | 3.01E-17   | 2.42E-15   | 28.3216363  |
| MAD2L1      | 1.34900956 | 2.42071439 | 7.24682627 | 2.02E-12   | 8.38E-11   | 17.4037904  |
| TMEM238     | 1.34892932 | 2.79420908 | 5.5670059  | 4.60E-08   | 9.28E-07   | 7.62681509  |
| ITGB6       | 1.34880246 | 4.00124817 | 3.78012488 | 0.00017913 | 0.00165622 | -0.28424302 |
| LIG1        | 1.3468843  | 3.3513747  | 9.86444758 | 8.30E-21   | 1.03E-18   | 36.4033091  |
| FCRLB       | 1.34408869 | 2.07385244 | 3.77744117 | 0.00018101 | 0.00167198 | -0.29403218 |
| CDCP1       | 1.34256128 | 3.57057951 | 5.22236937 | 2.77E-07   | 4.81E-06   | 5.89103438  |
| OIP5        | 1.34144728 | 2.03258408 | 7.7317757  | 7.73E-14   | 3.90E-12   | 20.6035673  |
| F11R        | 1.34141987 | 5.65022472 | 5.94101001 | 5.90E-09   | 1.41E-07   | 9.61832225  |
| SLC50A1     | 1.34112479 | 5.00287224 | 7.69281141 | 1.01E-13   | 5.03E-12   | 20.3406522  |
| EBP         | 1.34077417 | 4.80260298 | 8.34188344 | 1.03E-15   | 6.76E-14   | 24.8479293  |
| SDF2L1      | 1.33745713 | 4.68387009 | 7.45055017 | 5.23E-13   | 2.35E-11   | 18.7286374  |
| S1PR5       | 1.336646   | 2.28028834 | 4.65149866 | 4.41E-06   | 5.98E-05   | 3.23228117  |
| MMP9        | 1.33648932 | 3.06545303 | 2.7972782  | 0.00538732 | 0.03089573 | -3.42752495 |
| DEPDC1B     | 1.33644235 | 1.88278738 | 7.81750705 | 4.27E-14   | 2.25E-12   | 21.1855578  |
| VAMP8       | 1.33570557 | 7.28653551 | 7.0849862  | 5.80E-12   | 2.24E-10   | 16.371753   |
| MMP13       | 1.33216409 | 1.93722626 | 2.94080651 | 0.00345218 | 0.02129108 | -3.0244671  |
| COL11A1     | 1.33166812 | 1.38538059 | 3.85014402 | 0.00013618 | 0.00129946 | -0.02654639 |
| KIF22       | 1.3316136  | 4.34068441 | 7.99696081 | 1.22E-14   | 6.99E-13   | 22.4192445  |
| ORC1        | 1.33144967 | 1.9938178  | 7.57487562 | 2.26E-13   | 1.07E-11   | 19.5509986  |
| B3GNT3      | 1.33063667 | 4.51550471 | 3.46373043 | 0.00058675 | 0.00469293 | -1.3933025  |
| DUS1L       | 1.32921947 | 4.67185912 | 9.50950599 | 1.43E-19   | 1.54E-17   | 33.5952293  |
| PLEK2       | 1.32807319 | 3.9284953  | 4.26532569 | 2.46E-05   | 0.00028    | 1.5914414   |
| PALM3       | 1.32641798 | 2.52161956 | 3.0213915  | 0.00266795 | 0.01717652 | -2.78968334 |
| MIR647      | 1.32607725 | 2.70536847 | 5.56745129 | 4.59E-08   | 9.26E-07   | 7.62912059  |
| RACGAP1     | 1.32251643 | 3.40060182 | 6.61701043 | 1.10E-10   | 3.55E-09   | 13.4921313  |
| NFE2L3      | 1.32228149 | 3.03852503 | 5.33474191 | 1.56E-07   | 2.85E-06   | 6.44637206  |
| HIST2H2BE   | 1.32093006 | 3.62225443 | 4.55793258 | 6.76E-06   | 8.79E-05   | 2.82286905  |
| SLC29A2     | 1.32030377 | 2.54631852 | 5.82129565 | 1.15E-08   | 2.60E-07   | 8.96884275  |
| SERPINA1    | 1.3197249  | 2.66577739 | 3.08129602 | 0.00219483 | 0.01453935 | -2.61121402 |
| STRA13      | 1.31942353 | 5.16757894 | 8.42039214 | 5.80E-16   | 3.95E-14   | 25.4110521  |
| EXO1        | 1.31520887 | 1.85480452 | 7.80260928 | 4.74E-14   | 2.48E-12   | 21.0840786  |
| RFC4        | 1.3145919  | 3.31617086 | 7.35572909 | 9.85E-13   | 4.27E-11   | 18.1084677  |
| SLC12A8     | 1.31261363 | 1.96638545 | 6.61176653 | 1.14E-10   | 3.65E-09   | 13.4607624  |
| UNC13D      | 1.3122717  | 3.23097677 | 4.39808604 | 1.38E-05   | 0.00016685 | 2.1409242   |
| GRHL2       | 1.31179948 | 3.66787213 | 5.27679866 | 2.10E-07   | 3.74E-06   | 6.15872625  |
| RBBP8NL     | 1.30907269 | 2.3245344  | 4.40324257 | 1.35E-05   | 0.00016357 | 2.16257709  |
| PPP1R13L    | 1.30795783 | 4.45087875 | 5.69772325 | 2.27E-08   | 4.85E-07   | 8.31026276  |
| NUP210      | 1.30695654 | 3.16672771 | 4.35112122 | 1.70E-05   | 0.00020094 | 1.94478017  |
| FZD2        | 1.30668382 | 2.37783306 | 5.63030854 | 3.27E-08   | 6.77E-07   | 7.95608439  |
| PFKFB4      | 1.30184387 | 1.94369831 | 7.19664671 | 2.81E-12   | 1.13E-10   | 17.0818491  |
| BOP1        | 1.30149463 | 4.63773992 | 7.85283102 | 3.34E-14   | 1.79E-12   | 21.4267522  |
| IRF5        | 1.30102611 | 3.07823902 | 5.72246019 | 1.98E-08   | 4.29E-07   | 8.44113069  |
| ABRACL      | 1.29958953 | 5.36906626 | 7.21849247 | 2.43E-12   | 9.94E-11   | 17.2217921  |
| ZDHHC12     | 1.29835888 | 4.52947904 | 7.83949173 | 3.67E-14   | 1.96E-12   | 21.3355753  |
| ALDH3B2     | 1.29833439 | 3.65596607 | 3.22533725 | 0.00135531 | 0.00962445 | -2.16839244 |
| GGCT        | 1.29774965 | 5.43696648 | 7.58028664 | 2.18E-13   | 1.03E-11   | 19.587026   |
| DSG2        | 1.29688992 | 4.57298539 | 4.54700712 | 7.10E-06   | 9.19E-05   | 2.77555437  |
| POLD1       | 1.29271478 | 3.24302881 | 8.81449264 | 3.10E-17   | 2.48E-15   | 28.2938801  |

|              |            |            |            |            |            |             |
|--------------|------------|------------|------------|------------|------------|-------------|
| CAPG         | 1.29204243 | 6.61581333 | 5.103498   | 5.04E-07   | 8.35E-06   | 5.31490669  |
| KCNG1        | 1.29100093 | 2.15472057 | 3.34529634 | 0.00089483 | 0.00675103 | -1.78491864 |
| FABP6        | 1.29080558 | 2.60424355 | 3.10306282 | 0.00204298 | 0.01367456 | -2.54553581 |
| RP11-927P21  | 1.29011411 | 2.58600208 | 5.06779731 | 6.01E-07   | 9.82E-06   | 5.14416658  |
| FUT3         | 1.28819236 | 2.74110537 | 3.49966373 | 0.000515   | 0.00419257 | -1.27193854 |
| STXBP2       | 1.28787673 | 3.83169492 | 8.20537922 | 2.76E-15   | 1.74E-13   | 23.8778623  |
| MCM10        | 1.28655144 | 1.81214994 | 7.15431616 | 3.70E-12   | 1.47E-10   | 16.811626   |
| ELMO3        | 1.28578377 | 4.0517405  | 4.62442036 | 4.99E-06   | 6.68E-05   | 3.11302256  |
| AC006262.5   | 1.28524963 | 1.47755289 | 3.47467427 | 0.00056396 | 0.00453366 | -1.35646518 |
| CXCL11       | 1.28251563 | 1.94523806 | 2.87951589 | 0.00418387 | 0.02503418 | -3.19895652 |
| ALG3         | 1.28157284 | 4.43159261 | 10.8308859 | 2.62E-24   | 4.82E-22   | 44.3643656  |
| SNRPB        | 1.2811723  | 7.69021648 | 8.94090832 | 1.19E-17   | 9.90E-16   | 29.2379406  |
| MYCL         | 1.28050386 | 3.85044388 | 3.03830467 | 0.00252569 | 0.01640531 | -2.73963488 |
| FERMT1       | 1.2802768  | 3.54206716 | 4.97395524 | 9.54E-07   | 1.50E-05   | 4.70043385  |
| DTYMK        | 1.27985742 | 3.95642271 | 8.45130675 | 4.62E-16   | 3.21E-14   | 25.6338271  |
| DNMT3B       | 1.27904547 | 2.03263065 | 5.91004638 | 7.02E-09   | 1.65E-07   | 9.44926187  |
| TRAF4        | 1.27904263 | 5.07458524 | 5.96627026 | 5.11E-09   | 1.24E-07   | 9.75679588  |
| ASPM         | 1.27826994 | 1.75900865 | 7.00696809 | 9.58E-12   | 3.59E-10   | 15.880798   |
| TCF19        | 1.27054261 | 3.52133377 | 5.41598313 | 1.02E-07   | 1.93E-06   | 6.8542929   |
| CALR         | 1.26923946 | 8.68012274 | 10.1742014 | 6.57E-22   | 9.43E-20   | 38.9062608  |
| MEN1         | 1.26815077 | 3.88713191 | 11.842088  | 3.69E-28   | 1.02E-25   | 53.1350313  |
| LLGL2        | 1.26743247 | 3.76209504 | 5.1045115  | 5.01E-07   | 8.31E-06   | 5.31976929  |
| CDCA7        | 1.26533228 | 2.4300262  | 5.29845374 | 1.88E-07   | 3.38E-06   | 6.26590605  |
| SLC35A2      | 1.26517702 | 4.15744645 | 8.39027644 | 7.23E-16   | 4.86E-14   | 25.1945941  |
| SHCBP1       | 1.26270888 | 2.12311165 | 7.01174994 | 9.29E-12   | 3.49E-10   | 15.9107657  |
| TMEM160      | 1.26207389 | 3.76363303 | 6.68283852 | 7.37E-11   | 2.42E-09   | 13.8876291  |
| SBK1         | 1.26197165 | 1.79524039 | 3.82202156 | 0.00015211 | 0.00143431 | -0.13057805 |
| PSAT1        | 1.26106864 | 3.780597   | 4.85888654 | 1.66E-06   | 2.48E-05   | 4.16641618  |
| RP11-329L6.  | 1.26070154 | 2.14063362 | 6.21150243 | 1.25E-09   | 3.34E-08   | 11.1267639  |
| P3H4         | 1.25830486 | 3.35673942 | 6.04714709 | 3.23E-09   | 8.08E-08   | 10.2034854  |
| TBX1         | 1.25820086 | 2.2421235  | 3.22256399 | 0.00136818 | 0.00970404 | -2.17710021 |
| AUNIP        | 1.25592275 | 1.83378963 | 7.75655559 | 6.52E-14   | 3.33E-12   | 20.7712917  |
| KIF15        | 1.25551505 | 1.8651413  | 7.29956833 | 1.43E-12   | 6.04E-11   | 17.7440495  |
| PSRC1        | 1.25454373 | 2.34820394 | 7.25796104 | 1.88E-12   | 7.84E-11   | 17.4754652  |
| CDC25C       | 1.25365562 | 1.70199007 | 8.30678206 | 1.33E-15   | 8.62E-14   | 24.59738    |
| ARHGAP11A    | 1.25238159 | 2.20143142 | 7.35403302 | 9.96E-13   | 4.31E-11   | 18.0974306  |
| HIST1H2AD    | 1.25213582 | 1.38600815 | 5.08672359 | 5.47E-07   | 9.01E-06   | 5.23455026  |
| SGOL1        | 1.25187885 | 1.68667745 | 7.79950603 | 4.84E-14   | 2.54E-12   | 21.0629584  |
| C17orf53     | 1.25175581 | 2.01904916 | 8.59761907 | 1.57E-16   | 1.18E-14   | 26.6960096  |
| ESRP2        | 1.25133854 | 3.91033045 | 4.47396336 | 9.87E-06   | 0.00012342 | 2.46187474  |
| RP3-523K23.  | 1.24854605 | 3.2160762  | 4.83245741 | 1.89E-06   | 2.77E-05   | 4.04533973  |
| SLC26A6      | 1.2463748  | 2.13936105 | 8.42869232 | 5.46E-16   | 3.72E-14   | 25.4708072  |
| MIS18A       | 1.24623171 | 3.6414706  | 7.91830351 | 2.12E-14   | 1.18E-12   | 21.875943   |
| CKAP2        | 1.24506507 | 3.20754333 | 7.04960603 | 7.29E-12   | 2.77E-10   | 16.1485793  |
| MTFR2        | 1.24474278 | 1.8169714  | 8.48189293 | 3.69E-16   | 2.60E-14   | 25.8548063  |
| MTHFD1L      | 1.24460287 | 2.90685801 | 7.11890656 | 4.66E-12   | 1.82E-10   | 16.5865445  |
| DDX39A       | 1.2427325  | 4.69313374 | 9.28674969 | 8.25E-19   | 8.01E-17   | 31.8669771  |
| KNSTRN       | 1.24218896 | 2.70030097 | 7.97860248 | 1.38E-14   | 7.88E-13   | 22.2920848  |
| CDC25A       | 1.24015963 | 2.04269547 | 7.57834286 | 2.21E-13   | 1.05E-11   | 19.5740818  |
| DEPDC1       | 1.23877145 | 1.76190844 | 6.86789297 | 2.32E-11   | 8.24E-10   | 15.0163343  |
| RP11-480I12. | 1.2385696  | 1.85012405 | 4.84614371 | 1.77E-06   | 2.61E-05   | 4.10796529  |
| KRTCAP3      | 1.23829463 | 4.16135875 | 3.27407885 | 0.00114664 | 0.00834465 | -2.01418509 |
| RP11-532F12  | 1.23762697 | 3.41821597 | 5.094703   | 5.26E-07   | 8.68E-06   | 5.27274578  |
| HIST1H1PS1   | 1.23585675 | 1.40887404 | 4.91736402 | 1.26E-06   | 1.92E-05   | 4.43640875  |
| SLC25A39     | 1.2357065  | 5.8845699  | 9.86901214 | 8.00E-21   | 1.00E-18   | 36.4398443  |
| NUDT8        | 1.23474504 | 2.96523184 | 5.92359873 | 6.50E-09   | 1.54E-07   | 9.52316517  |
| PRSS22       | 1.23405729 | 3.91949721 | 3.69561288 | 0.000248   | 0.00221202 | -0.5893857  |
| KAT2A        | 1.23047186 | 4.67652549 | 8.08198306 | 6.66E-15   | 4.00E-13   | 23.0109565  |

|             |            |            |            |            |            |             |
|-------------|------------|------------|------------|------------|------------|-------------|
| ATAD2       | 1.2297874  | 3.02515346 | 6.35072332 | 5.51E-10   | 1.55E-08   | 11.9249558  |
| CCNF        | 1.22844049 | 2.55612863 | 8.41177799 | 6.18E-16   | 4.18E-14   | 25.3490809  |
| PPP1R35     | 1.22806394 | 4.25906891 | 7.89499592 | 2.49E-14   | 1.36E-12   | 21.7157174  |
| TMEM206     | 1.22780759 | 2.55809736 | 8.90836915 | 1.52E-17   | 1.26E-15   | 28.9940611  |
| GALE        | 1.22476976 | 4.15652281 | 6.82395763 | 3.06E-11   | 1.06E-09   | 14.7461177  |
| POLR2H      | 1.22383629 | 4.49438662 | 10.8828046 | 1.68E-24   | 3.18E-22   | 44.8042681  |
| OAS3        | 1.22260824 | 3.82059363 | 4.66833967 | 4.08E-06   | 5.57E-05   | 3.30676956  |
| TSTA3       | 1.22070637 | 4.96781418 | 8.0246385  | 1.00E-14   | 5.87E-13   | 22.6113621  |
| SYNGR2      | 1.21896064 | 5.99085543 | 7.54595514 | 2.75E-13   | 1.29E-11   | 19.358774   |
| SNHG12      | 1.21641943 | 2.95399291 | 7.74738565 | 6.94E-14   | 3.53E-12   | 20.7091773  |
| CDCA2       | 1.21274058 | 1.71909444 | 7.22581769 | 2.32E-12   | 9.52E-11   | 17.2687914  |
| OAS1        | 1.2125994  | 4.34958689 | 4.26988822 | 2.41E-05   | 0.00027521 | 1.61006928  |
| LMNB2       | 1.21232866 | 4.57275143 | 7.07818926 | 6.06E-12   | 2.33E-10   | 16.3288104  |
| NUDT1       | 1.2122017  | 3.73575083 | 7.57872524 | 2.20E-13   | 1.04E-11   | 19.576628   |
| MBOAT7      | 1.21017581 | 5.31805316 | 6.37935537 | 4.65E-10   | 1.33E-08   | 12.0909255  |
| INHBA       | 1.20889873 | 1.99188928 | 3.74301889 | 0.00020679 | 0.00188388 | -0.41901479 |
| RP11-50C13. | 1.2074554  | 2.76275123 | 4.61478589 | 5.22E-06   | 6.95E-05   | 3.07074208  |
| CCDC167     | 1.20636727 | 4.86746107 | 7.45369353 | 5.12E-13   | 2.30E-11   | 18.7493009  |
| POP7        | 1.20594725 | 5.22394558 | 9.57051584 | 8.80E-20   | 9.66E-18   | 34.0732149  |
| RP6-65G23.3 | 1.20585444 | 2.31150205 | 6.39627513 | 4.20E-10   | 1.21E-08   | 12.1892927  |
| CENPH       | 1.20419608 | 2.74976341 | 7.61629718 | 1.71E-13   | 8.28E-12   | 19.8272877  |
| TMSB10      | 1.20254262 | 11.2492347 | 5.38395692 | 1.21E-07   | 2.25E-06   | 6.69284393  |
| PROM2       | 1.20155744 | 4.79286799 | 3.07220632 | 0.00226127 | 0.01491512 | -2.63851004 |
| RHBDF2      | 1.20089845 | 2.94392781 | 7.56415471 | 2.43E-13   | 1.14E-11   | 19.4796751  |
| C1orf233    | 1.1990952  | 3.02946572 | 4.60467509 | 5.46E-06   | 7.25E-05   | 3.02645703  |
| ISYNA1      | 1.19892519 | 4.62727499 | 3.67173452 | 0.00027157 | 0.002394   | -0.6744304  |
| PLXNA1      | 1.1981396  | 3.63307915 | 6.78781695 | 3.84E-11   | 1.31E-09   | 14.5248835  |
| DBNDD1      | 1.19736684 | 2.29557562 | 4.82375003 | 1.97E-06   | 2.87E-05   | 4.00557921  |
| MRPL12      | 1.1969183  | 5.15537313 | 7.30794546 | 1.35E-12   | 5.74E-11   | 17.79827    |
| TMUB1       | 1.19576024 | 4.96776843 | 8.77900379 | 4.05E-17   | 3.20E-15   | 28.0305167  |
| PLK4        | 1.19562535 | 1.96610624 | 8.19328619 | 3.01E-15   | 1.88E-13   | 23.7924816  |
| PYCRL       | 1.19359071 | 3.03969831 | 7.86495914 | 3.07E-14   | 1.65E-12   | 21.5097508  |
| MIR205HG    | 1.19291333 | 4.11854887 | 2.89524916 | 0.00398366 | 0.02405565 | -3.15450211 |
| TMEM74B     | 1.19242167 | 1.61320196 | 4.83243086 | 1.89E-06   | 2.77E-05   | 4.0452184   |
| STEAP3      | 1.19080628 | 3.76189449 | 5.2111927  | 2.93E-07   | 5.06E-06   | 5.83636755  |
| MCM7        | 1.19053834 | 5.35371476 | 7.23234927 | 2.22E-12   | 9.15E-11   | 17.31073    |
| PRRG2       | 1.18838614 | 3.1808538  | 5.53430184 | 5.47E-08   | 1.09E-06   | 7.45796419  |
| EPHA1       | 1.18675554 | 3.33665758 | 4.68372609 | 3.80E-06   | 5.22E-05   | 3.37503652  |
| RP3-416H24. | 1.18554915 | 2.8143828  | 3.13766918 | 0.00182134 | 0.0123793  | -2.44020688 |
| BAIAP2L1    | 1.18485507 | 3.95127939 | 6.38160328 | 4.58E-10   | 1.31E-08   | 12.1039819  |
| YIF1B       | 1.18428202 | 3.92806049 | 7.53521411 | 2.96E-13   | 1.37E-11   | 19.2875248  |
| RTKN        | 1.18185291 | 2.98315613 | 5.26959918 | 2.18E-07   | 3.87E-06   | 6.12317834  |
| HIST1H2AC   | 1.18152143 | 4.27129927 | 4.11687034 | 4.61E-05   | 0.0004946  | 0.99532953  |
| ITPR3       | 1.18055258 | 3.17616575 | 5.33958141 | 1.52E-07   | 2.78E-06   | 6.47052095  |
| BID         | 1.17969903 | 3.73301677 | 7.86796312 | 3.01E-14   | 1.62E-12   | 21.5303232  |
| DONSON      | 1.17965974 | 2.81765712 | 7.06726211 | 6.51E-12   | 2.50E-10   | 16.2598415  |
| IGFBP3      | 1.17927112 | 6.9630687  | 2.6518981  | 0.00830309 | 0.04398804 | -3.81595426 |
| PCK2        | 1.17819799 | 3.85651976 | 6.68834087 | 7.12E-11   | 2.34E-09   | 13.920831   |
| ITGB4       | 1.17746505 | 6.01215578 | 3.60906899 | 0.00034385 | 0.0029481  | -0.89515653 |
| ACTL6A      | 1.17698669 | 4.26952642 | 8.28918383 | 1.51E-15   | 9.73E-14   | 24.4720521  |
| MRPS12      | 1.17454954 | 4.67294091 | 7.18906377 | 2.95E-12   | 1.19E-10   | 17.0333505  |
| EPS8L2      | 1.17400592 | 4.557508   | 5.01648736 | 7.74E-07   | 1.24E-05   | 4.90063497  |
| FANCD2      | 1.17316703 | 2.1176386  | 7.89941497 | 2.41E-14   | 1.33E-12   | 21.7460688  |
| DSN1        | 1.17128393 | 3.46253548 | 7.63486394 | 1.50E-13   | 7.34E-12   | 19.9515025  |
| CHAF1B      | 1.17015195 | 2.13317954 | 6.92490361 | 1.62E-11   | 5.85E-10   | 15.3690327  |
| SLC1A6      | 1.17004334 | 1.19272269 | 2.95077077 | 0.00334494 | 0.02076785 | -2.99576617 |
| SEZ6L2      | 1.1691057  | 3.03123704 | 3.53132053 | 0.00045867 | 0.00379058 | -1.16403909 |
| B4GALNT4    | 1.16868892 | 1.76667881 | 3.39927014 | 0.00073937 | 0.00572537 | -1.60804766 |

|             |            |            |            |            |            |             |
|-------------|------------|------------|------------|------------|------------|-------------|
| TRAI        | 1.16850167 | 2.01430372 | 8.25641882 | 1.91E-15   | 1.22E-13   | 24.2392228  |
| LYPLA2      | 1.16836663 | 5.81793769 | 8.57609422 | 1.84E-16   | 1.37E-14   | 26.538939   |
| AP1S1       | 1.16654762 | 5.46803354 | 8.4578574  | 4.41E-16   | 3.07E-14   | 25.6811065  |
| LY6E        | 1.16578401 | 6.52576399 | 3.08638436 | 0.00215843 | 0.01432909 | -2.59590026 |
| RP11-295G2C | 1.16506218 | 2.66303047 | 5.92608614 | 6.41E-09   | 1.52E-07   | 9.53674506  |
| MIF         | 1.1636419  | 5.71906667 | 6.28281019 | 8.23E-10   | 2.26E-08   | 11.5337578  |
| GPR56       | 1.16312539 | 4.63630954 | 4.97684383 | 9.40E-07   | 1.48E-05   | 4.71398263  |
| CEP131      | 1.16206245 | 3.24277644 | 7.28864711 | 1.54E-12   | 6.48E-11   | 17.6734351  |
| B4GALT3     | 1.1606602  | 4.35774775 | 6.61571258 | 1.11E-10   | 3.57E-09   | 13.4843657  |
| CDC7        | 1.16018247 | 2.22738206 | 6.8232088  | 3.07E-11   | 1.06E-09   | 14.7415242  |
| NUDT5       | 1.15894943 | 3.90133715 | 8.56015836 | 2.07E-16   | 1.53E-14   | 26.4228309  |
| CCDC137     | 1.15866178 | 4.24804666 | 9.47220401 | 1.92E-19   | 2.03E-17   | 33.3039597  |
| DPP3        | 1.15730235 | 4.32426445 | 9.12881072 | 2.81E-18   | 2.47E-16   | 30.65804    |
| C21orf58    | 1.15631021 | 1.57979257 | 7.17482559 | 3.24E-12   | 1.30E-10   | 16.9423949  |
| CTSV        | 1.15517365 | 1.58686979 | 3.78219156 | 0.0001777  | 0.00164505 | -0.27670016 |
| WDR72       | 1.15510544 | 2.06433224 | 3.74472143 | 0.00020544 | 0.00187419 | -0.41285825 |
| PFDN2       | 1.15496667 | 6.82358378 | 6.33167323 | 6.17E-10   | 1.72E-08   | 11.814871   |
| MROH6       | 1.15127241 | 2.59498771 | 4.47173133 | 9.97E-06   | 0.00012439 | 2.45236221  |
| MANF        | 1.15125316 | 5.45782486 | 7.82935618 | 3.94E-14   | 2.09E-12   | 21.266374   |
| PROSER2     | 1.15102397 | 2.51248762 | 4.90089819 | 1.36E-06   | 2.06E-05   | 4.36009375  |
| SLC9A3R1    | 1.15020976 | 5.0256759  | 4.7134425  | 3.31E-06   | 4.61E-05   | 3.50745619  |
| SLC19A1     | 1.14944402 | 1.95327191 | 7.75894754 | 6.41E-14   | 3.27E-12   | 20.787503   |
| MCM5        | 1.14876158 | 3.72453355 | 6.81666803 | 3.20E-11   | 1.10E-09   | 14.7014187  |
| ARHGAP39    | 1.14847609 | 2.07860133 | 8.92139508 | 1.38E-17   | 1.14E-15   | 29.0916169  |
| TINCR       | 1.14811721 | 2.32584524 | 3.62705081 | 0.00032145 | 0.00277395 | -0.83218456 |
| NCAPD2      | 1.1480728  | 4.21176583 | 6.20936801 | 1.27E-09   | 3.38E-08   | 11.1146412  |
| KIAA1522    | 1.14761106 | 5.51560785 | 5.10554706 | 4.98E-07   | 8.27E-06   | 5.32473862  |
| KLC3        | 1.14541806 | 1.54437809 | 4.60949576 | 5.34E-06   | 7.10E-05   | 3.04756051  |
| MIIP        | 1.14507781 | 3.87269324 | 7.99820305 | 1.21E-14   | 6.95E-13   | 22.4278567  |
| HOMER3      | 1.14417356 | 3.9440431  | 5.93823626 | 5.99E-09   | 1.43E-07   | 9.60314721  |
| MGME1       | 1.14403582 | 3.81373    | 9.15885492 | 2.23E-18   | 2.01E-16   | 30.8869462  |
| SLC16A3     | 1.14193427 | 3.89951116 | 4.26914714 | 2.42E-05   | 0.00027601 | 1.60704233  |
| ARHGEF19    | 1.14162039 | 3.49097537 | 4.86291384 | 1.63E-06   | 2.44E-05   | 4.18491783  |
| PQLC2       | 1.14070146 | 3.23406047 | 10.0935178 | 1.28E-21   | 1.77E-19   | 38.2497243  |
| STIL        | 1.14063319 | 1.61272533 | 7.7742785  | 5.77E-14   | 2.98E-12   | 20.8914975  |
| SLC39A11    | 1.13831468 | 3.40835305 | 7.21421573 | 2.50E-12   | 1.02E-10   | 17.1943694  |
| AC098973.2  | 1.13756977 | 1.77634429 | 2.99487497 | 0.00290585 | 0.01842173 | -2.86761073 |
| TREM2       | 1.13629665 | 2.51007096 | 3.76056042 | 0.00019325 | 0.00177269 | -0.3554576  |
| FLAD1       | 1.13573084 | 3.99558095 | 9.20990958 | 1.50E-18   | 1.39E-16   | 31.277083   |
| ESPL1       | 1.13513495 | 1.93467232 | 6.38911377 | 4.38E-10   | 1.26E-08   | 12.1476321  |
| LSM4        | 1.13503809 | 5.29888103 | 9.30213018 | 7.31E-19   | 7.18E-17   | 31.9854414  |
| IGSF8       | 1.13468873 | 4.91036568 | 6.35739078 | 5.29E-10   | 1.49E-08   | 11.9635496  |
| RANBP1      | 1.13427611 | 4.43577999 | 7.68953811 | 1.03E-13   | 5.13E-12   | 20.3186109  |
| MIEN1       | 1.1340663  | 4.83446062 | 5.65193568 | 2.91E-08   | 6.10E-07   | 8.06931277  |
| CCNL2       | 1.13251146 | 4.5306724  | 5.43510356 | 9.24E-08   | 1.76E-06   | 6.95107917  |
| PFDN6       | 1.13194971 | 4.12843262 | 8.44170042 | 4.96E-16   | 3.42E-14   | 25.5645403  |
| MRPS26      | 1.13143863 | 5.94400178 | 7.95802999 | 1.60E-14   | 9.05E-13   | 22.1498452  |
| GPRIN1      | 1.12978274 | 1.49093505 | 5.51336202 | 6.12E-08   | 1.20E-06   | 7.35030397  |
| HES2        | 1.12905597 | 1.8577934  | 2.92789563 | 0.00359582 | 0.02204882 | -3.0615168  |
| E2F8        | 1.12520488 | 2.01167576 | 5.56870181 | 4.55E-08   | 9.20E-07   | 7.63559452  |
| PSME2       | 1.1250984  | 5.56335297 | 6.01038647 | 3.98E-09   | 9.81E-08   | 9.99982503  |
| RP1-86C11.7 | 1.12501289 | 1.43627675 | 4.90547181 | 1.33E-06   | 2.02E-05   | 4.38126841  |
| CHAC1       | 1.1245837  | 1.69770499 | 5.71378687 | 2.08E-08   | 4.48E-07   | 8.3951902   |
| PDXK        | 1.12432894 | 4.03730542 | 7.0456907  | 7.47E-12   | 2.84E-10   | 16.1239361  |
| GALNT6      | 1.12263052 | 1.96955596 | 4.69873429 | 3.54E-06   | 4.89E-05   | 3.44182043  |
| SNX10       | 1.12251304 | 2.18228026 | 5.06107944 | 6.22E-07   | 1.01E-05   | 5.11215665  |
| TUBG1       | 1.12200468 | 4.77891129 | 8.06495263 | 7.52E-15   | 4.49E-13   | 22.8920653  |
| PVRL1       | 1.12136119 | 5.00664299 | 3.52880494 | 0.00046293 | 0.00382196 | -1.17264678 |

|             |            |            |            |            |            |             |
|-------------|------------|------------|------------|------------|------------|-------------|
| CHEK1       | 1.12040897 | 2.10982379 | 7.50291581 | 3.68E-13   | 1.68E-11   | 19.0737455  |
| P4HB        | 1.11996949 | 7.72894837 | 8.82889069 | 2.78E-17   | 2.25E-15   | 28.4009372  |
| REEP4       | 1.11912378 | 4.85552423 | 6.47692131 | 2.59E-10   | 7.75E-09   | 12.6610919  |
| CLSTN3      | 1.11846732 | 3.64664611 | 6.15428916 | 1.74E-09   | 4.56E-08   | 10.8030146  |
| MAPK15      | 1.11809332 | 1.52079198 | 4.65024082 | 4.43E-06   | 6.01E-05   | 3.22672744  |
| UQCC3       | 1.11784982 | 3.65566719 | 7.21066725 | 2.56E-12   | 1.04E-10   | 17.171626   |
| MIR7111     | 1.11769922 | 1.55477712 | 6.07581238 | 2.74E-09   | 6.94E-08   | 10.3630207  |
| IRF6        | 1.11718732 | 5.21102553 | 3.42271116 | 0.00068002 | 0.00533377 | -1.53039702 |
| UNG         | 1.11585094 | 4.67740522 | 8.24542438 | 2.07E-15   | 1.32E-13   | 24.1612451  |
| RGS19       | 1.11460555 | 3.47731181 | 7.25117579 | 1.96E-12   | 8.16E-11   | 17.4317782  |
| RFC2        | 1.11420357 | 4.29660868 | 8.07386503 | 7.06E-15   | 4.23E-13   | 22.9542607  |
| TOMM34      | 1.11351188 | 5.35855525 | 6.23549859 | 1.09E-09   | 2.93E-08   | 11.2632924  |
| AC016735.2  | 1.11350759 | 1.72724666 | 3.09895523 | 0.00207087 | 0.01383748 | -2.5579637  |
| C9orf142    | 1.11213854 | 4.89537071 | 6.556862   | 1.59E-10   | 4.98E-09   | 13.1335404  |
| TMEM97      | 1.11197722 | 4.78462089 | 2.81925871 | 0.00503821 | 0.02925611 | -3.36705756 |
| NCAPG2      | 1.11155278 | 2.4461044  | 6.25603328 | 9.63E-10   | 2.61E-08   | 11.3804742  |
| GPT2        | 1.11147532 | 2.87563371 | 5.17392469 | 3.54E-07   | 6.01E-06   | 5.65482873  |
| CENPE       | 1.11089597 | 1.72621333 | 7.05933642 | 6.85E-12   | 2.62E-10   | 16.2098696  |
| RP1-34B20.4 | 1.11024288 | 1.22890451 | 4.56231542 | 6.63E-06   | 8.64E-05   | 2.84187864  |
| RP11-303E16 | 1.11017726 | 3.36663241 | 6.4065032  | 3.95E-10   | 1.14E-08   | 12.2488601  |
| SNRPF       | 1.11003511 | 4.53859436 | 7.6070896  | 1.82E-13   | 8.76E-12   | 19.7657727  |
| EIF2AK1     | 1.10919787 | 5.14340321 | 10.366488  | 1.33E-22   | 2.01E-20   | 40.4836245  |
| FANCG       | 1.10801014 | 3.09724848 | 7.12309015 | 4.53E-12   | 1.78E-10   | 16.6130918  |
| AC019129.2  | 1.10799351 | 1.62132652 | 3.55924377 | 0.00041383 | 0.0034666  | -1.06810491 |
| GMNN        | 1.10796849 | 3.93408526 | 5.77595363 | 1.48E-08   | 3.28E-07   | 8.72579008  |
| IGFL1P1     | 1.10794159 | 1.30942975 | 3.29107072 | 0.0010812  | 0.00794066 | -1.95990975 |
| FANCA       | 1.10755881 | 1.62428108 | 7.81065101 | 4.48E-14   | 2.36E-12   | 21.1388385  |
| RP11-109M1  | 1.10731006 | 1.47441802 | 2.9289168  | 0.00358426 | 0.02199876 | -3.05859211 |
| HMGB2       | 1.10637324 | 5.58541366 | 5.04549481 | 6.71E-07   | 1.09E-05   | 5.03804258  |
| TMEM184A    | 1.1063724  | 2.94104836 | 3.7044698  | 0.00023975 | 0.00214734 | -0.55770967 |
| PARP12      | 1.10578554 | 3.26514278 | 5.79334081 | 1.34E-08   | 3.00E-07   | 8.8188012   |
| PTK6        | 1.10459756 | 4.26930204 | 2.98817409 | 0.00296897 | 0.01874859 | -2.88719922 |
| ARL6IP1     | 1.104156   | 6.21555155 | 6.50933315 | 2.13E-10   | 6.51E-09   | 12.8520742  |
| DARS2       | 1.10367582 | 3.28888892 | 6.8168615  | 3.20E-11   | 1.10E-09   | 14.7026046  |
| KIAA0907    | 1.10366524 | 3.26613907 | 6.94265103 | 1.44E-11   | 5.26E-10   | 15.479302   |
| GALNT14     | 1.10237363 | 2.20065223 | 3.66506046 | 0.00027853 | 0.00244732 | -0.69810813 |
| TARBP2      | 1.1014116  | 3.28913392 | 9.59009949 | 7.53E-20   | 8.30E-18   | 34.2270618  |
| EME1        | 1.10095321 | 1.39352252 | 7.79701257 | 4.93E-14   | 2.58E-12   | 21.0459929  |
| THEM6       | 1.10033408 | 4.62568489 | 3.85783996 | 0.00013211 | 0.00126387 | 0.00204662  |
| ZNF692      | 1.09936129 | 3.33150549 | 5.89598769 | 7.59E-09   | 1.77E-07   | 9.372749    |
| C1orf53     | 1.09928588 | 2.2083562  | 6.43723935 | 3.29E-10   | 9.65E-09   | 12.428336   |
| CASP2       | 1.09873131 | 2.97111555 | 9.37761185 | 4.05E-19   | 4.07E-17   | 32.5686902  |
| PRR36       | 1.0983413  | 1.50272851 | 3.70287191 | 0.00024122 | 0.00215924 | -0.56342965 |
| CHAF1A      | 1.09731869 | 3.43457943 | 7.36875038 | 9.03E-13   | 3.93E-11   | 18.1932694  |
| DSCC1       | 1.09716871 | 2.16200764 | 6.32444811 | 6.44E-10   | 1.79E-08   | 11.7731907  |
| DUSP23      | 1.09646684 | 5.49422127 | 4.86178312 | 1.64E-06   | 2.45E-05   | 4.17972187  |
| HES4        | 1.09615902 | 3.88306873 | 3.64957783 | 0.00029532 | 0.002572   | -0.75288046 |
| CTD-253719  | 1.09538085 | 2.01268003 | 5.47606996 | 7.45E-08   | 1.44E-06   | 7.15944593  |
| ATAD3A      | 1.09441289 | 3.90822023 | 7.8673716  | 3.02E-14   | 1.63E-12   | 21.5262718  |
| CENPK       | 1.09387122 | 1.6123945  | 7.26233155 | 1.83E-12   | 7.64E-11   | 17.5036217  |
| TAGLN2      | 1.09332953 | 8.5470993  | 5.31497412 | 1.73E-07   | 3.12E-06   | 6.3479305   |
| BLOC1S3     | 1.09316538 | 3.19501699 | 8.63658351 | 1.18E-16   | 8.92E-15   | 26.9810425  |
| MIR621      | 1.09315003 | 3.4048716  | 5.23850601 | 2.55E-07   | 4.46E-06   | 5.97014281  |
| TOMM40      | 1.09253316 | 4.88378608 | 7.98544409 | 1.32E-14   | 7.53E-13   | 22.3394482  |
| ATP5J2      | 1.09194513 | 5.77942891 | 8.5720666  | 1.90E-16   | 1.41E-14   | 26.5095795  |
| FKBPL       | 1.09084831 | 3.13990515 | 7.93028446 | 1.95E-14   | 1.09E-12   | 21.9584411  |
| SREBF1      | 1.0904303  | 4.3754413  | 4.78074981 | 2.41E-06   | 3.46E-05   | 3.81016987  |
| MRM1        | 1.09042204 | 2.97538045 | 7.54082345 | 2.85E-13   | 1.33E-11   | 19.324724   |

|             |            |            |            |            |            |             |
|-------------|------------|------------|------------|------------|------------|-------------|
| PPAP2C      | 1.08934023 | 3.56101466 | 3.89097697 | 0.00011584 | 0.00112484 | 0.12576955  |
| ARHGAP40    | 1.08900932 | 2.04633036 | 3.5213289  | 0.00047579 | 0.00391744 | -1.19819365 |
| MYEOV       | 1.08858173 | 1.83158753 | 2.68068655 | 0.00763255 | 0.04112223 | -3.7406267  |
| BRMS1       | 1.08800017 | 4.85043679 | 7.78847062 | 5.23E-14   | 2.72E-12   | 20.9879042  |
| ROMO1       | 1.08725472 | 6.81208241 | 6.59241078 | 1.28E-10   | 4.09E-09   | 13.3451518  |
| KNTC1       | 1.08669863 | 1.94524927 | 7.58811208 | 2.07E-13   | 9.83E-12   | 19.6391637  |
| PPPICA      | 1.08485922 | 6.45220601 | 8.58432116 | 1.73E-16   | 1.29E-14   | 26.5989398  |
| LPCAT1      | 1.08451759 | 4.09603813 | 4.45748048 | 1.06E-05   | 0.00013176 | 2.39172934  |
| NR2F6       | 1.08416885 | 5.05176533 | 5.90159074 | 7.36E-09   | 1.72E-07   | 9.40322445  |
| ERBB3       | 1.08349812 | 4.17743135 | 3.49630377 | 0.00052134 | 0.00423477 | -1.28333686 |
| LAMTOR2     | 1.08264518 | 5.35962334 | 7.33800879 | 1.11E-12   | 4.75E-11   | 17.9932499  |
| BAX         | 1.08245451 | 5.0744508  | 8.51331563 | 2.93E-16   | 2.11E-14   | 26.0824186  |
| EXOSC4      | 1.08205296 | 4.49913558 | 6.71557621 | 6.01E-11   | 2.00E-09   | 14.0854979  |
| SPTBN2      | 1.08160815 | 2.53131511 | 4.68328461 | 3.80E-06   | 5.23E-05   | 3.37307492  |
| TMC4        | 1.08151887 | 4.66366887 | 3.03713002 | 0.00253534 | 0.01645518 | -2.74311948 |
| SP6         | 1.08018945 | 2.89379184 | 3.16246489 | 0.00167641 | 0.01154252 | -2.36405228 |
| PDRG1       | 1.07944796 | 4.00664996 | 7.43128464 | 5.95E-13   | 2.66E-11   | 18.6021377  |
| NR2C2AP     | 1.07880401 | 4.21173767 | 8.10554572 | 5.63E-15   | 3.42E-13   | 23.1757526  |
| MYH14       | 1.07856598 | 4.27730239 | 2.89051526 | 0.00404296 | 0.02433572 | -3.16790225 |
| PERP        | 1.07837721 | 7.05728061 | 3.47685576 | 0.00055952 | 0.00450044 | -1.3491091  |
| COASY       | 1.07824304 | 4.67192651 | 9.69347166 | 3.30E-20   | 3.81E-18   | 35.042477   |
| ABHD12      | 1.07735829 | 5.24564346 | 5.48239425 | 7.21E-08   | 1.40E-06   | 7.19173407  |
| CTD-2021H9  | 1.0765001  | 1.5607768  | 3.02223855 | 0.00266066 | 0.01714278 | -2.78718316 |
| KDELR3      | 1.07634302 | 3.43651251 | 3.87999062 | 0.00012101 | 0.00116825 | 0.08464083  |
| LYPD6B      | 1.07617954 | 3.03319966 | 3.46709611 | 0.00057965 | 0.00464443 | -1.38198521 |
| PSMB3       | 1.07604486 | 7.04120011 | 7.63235865 | 1.53E-13   | 7.46E-12   | 19.9347283  |
| RPS6KA1     | 1.07590829 | 3.45174731 | 6.50230652 | 2.22E-10   | 6.76E-09   | 12.8106045  |
| C10orf35    | 1.0754861  | 3.17124404 | 5.46058529 | 8.08E-08   | 1.55E-06   | 7.08052677  |
| CCNO        | 1.07214577 | 2.43249793 | 4.47251543 | 9.93E-06   | 0.00012411 | 2.45570345  |
| KIAA1524    | 1.07116931 | 1.91674684 | 6.62359569 | 1.06E-10   | 3.41E-09   | 13.5315528  |
| PYCARD      | 1.07089365 | 4.32242899 | 4.35365484 | 1.68E-05   | 0.00019889 | 1.95531246  |
| TFAP2A      | 1.06973765 | 2.38167561 | 3.99619599 | 7.59E-05   | 0.00077079 | 0.52514314  |
| HOXB6       | 1.06954476 | 1.98073807 | 3.58883145 | 0.00037082 | 0.00314943 | -0.96567594 |
| INCENP      | 1.06925659 | 2.88990115 | 6.09077298 | 2.52E-09   | 6.42E-08   | 10.4465348  |
| RSRP1       | 1.06888602 | 3.08911719 | 5.82126889 | 1.15E-08   | 2.60E-07   | 8.96869883  |
| TFAP2C      | 1.06793505 | 3.10657251 | 4.37317851 | 1.54E-05   | 0.00018447 | 2.03666071  |
| MAFG-AS1    | 1.06784345 | 1.79349229 | 5.57574077 | 4.39E-08   | 8.88E-07   | 7.67205859  |
| SLC35F2     | 1.06767166 | 2.72564074 | 5.38090167 | 1.23E-07   | 2.28E-06   | 6.67748556  |
| PPP1R16A    | 1.06750415 | 2.72667992 | 6.8426874  | 2.72E-11   | 9.51E-10   | 14.861142   |
| MYO19       | 1.06684003 | 2.34367761 | 8.3074532  | 1.32E-15   | 8.58E-14   | 24.6021634  |
| GAPDHP1     | 1.0649602  | 2.4846257  | 2.77415827 | 0.00577805 | 0.03272671 | -3.49063458 |
| RP11-465B22 | 1.06384171 | 2.54442561 | 3.25961275 | 0.00120523 | 0.00870592 | -2.06018212 |
| ATP13A2     | 1.0634931  | 3.86614613 | 8.07977555 | 6.77E-15   | 4.06E-13   | 22.9955352  |
| DDX11       | 1.06346433 | 2.38074971 | 7.61030293 | 1.78E-13   | 8.59E-12   | 19.7872342  |
| HENMT1      | 1.06325933 | 3.04542219 | 5.84272603 | 1.02E-08   | 2.33E-07   | 9.08428216  |
| CKLF        | 1.06305014 | 3.33202136 | 7.26454341 | 1.80E-12   | 7.55E-11   | 17.5178763  |
| TNFAIP2     | 1.0628005  | 6.23561668 | 2.99958232 | 0.00286225 | 0.01820669 | -2.85382471 |
| GALNT3      | 1.06084724 | 3.21992638 | 4.27054529 | 2.41E-05   | 0.00027454 | 1.61275344  |
| LSM7        | 1.05915245 | 5.13646447 | 6.8761768  | 2.20E-11   | 7.83E-10   | 15.067438   |
| CASC9       | 1.05873347 | 2.31378488 | 3.58333174 | 0.00037848 | 0.00320306 | -0.98477566 |
| TNFRSF25    | 1.0585759  | 2.49214047 | 5.91646923 | 6.77E-09   | 1.59E-07   | 9.4842689   |
| DTX4        | 1.05826808 | 3.70681405 | 3.64144297 | 0.00030451 | 0.00264225 | -0.78157165 |
| TCF3        | 1.0580517  | 4.22971034 | 7.9884229  | 1.29E-14   | 7.38E-13   | 22.3600795  |
| ATP6V0B     | 1.05787287 | 5.40833501 | 8.26079466 | 1.85E-15   | 1.19E-13   | 24.2702791  |
| SLC37A4     | 1.05749593 | 2.58618391 | 7.8978605  | 2.44E-14   | 1.34E-12   | 21.7353908  |
| KCNN4       | 1.05704174 | 4.18620001 | 2.88990363 | 0.00405068 | 0.02436781 | -3.16963205 |
| HIST1H4E    | 1.05613939 | 1.28587243 | 3.8482818  | 0.00013719 | 0.00130733 | -0.03345721 |
| SOX9        | 1.05562797 | 2.79081951 | 2.86910653 | 0.00432132 | 0.02570386 | -3.22824018 |



|             |            |            |            |            |            |             |
|-------------|------------|------------|------------|------------|------------|-------------|
| HOXB5       | 1.05513075 | 1.79814584 | 3.68929281 | 0.00025404 | 0.00225974 | -0.61194547 |
| RP11-54H7.4 | 1.05487872 | 1.08227035 | 2.87924701 | 0.00418737 | 0.02505255 | -3.19971421 |
| ZNF488      | 1.05448236 | 1.521706   | 3.78070922 | 0.00017873 | 0.00165337 | -0.28211074 |
| RP11-12G12. | 1.05380395 | 3.23355153 | 5.75920321 | 1.62E-08   | 3.56E-07   | 8.63641106  |
| COA6        | 1.05336934 | 4.33440785 | 8.05524106 | 8.06E-15   | 4.79E-13   | 22.8243502  |
| CTD-2583A1  | 1.05298217 | 2.3629756  | 6.35398159 | 5.40E-10   | 1.52E-08   | 11.9438118  |
| RHBG        | 1.05258364 | 1.46329054 | 3.15377765 | 0.00172593 | 0.01182986 | -2.39079831 |
| SLC2A6      | 1.05223393 | 2.52359111 | 3.9414936  | 9.46E-05   | 0.00094075 | 0.31627682  |
| RP11-764K9. | 1.05203141 | 2.51596313 | 4.77195158 | 2.51E-06   | 3.59E-05   | 3.77038087  |
| MRGBP       | 1.05201531 | 3.58521843 | 8.78941446 | 3.74E-17   | 2.97E-15   | 28.1076984  |
| FBXO6       | 1.05185428 | 3.61548891 | 6.19975985 | 1.34E-09   | 3.56E-08   | 11.0601131  |
| NT5DC2      | 1.05178327 | 4.37868185 | 5.01980752 | 7.62E-07   | 1.22E-05   | 4.91632684  |
| AUP1        | 1.05125601 | 6.20297202 | 9.38534736 | 3.81E-19   | 3.85E-17   | 32.6286376  |
| HIP1R       | 1.05021312 | 3.59634799 | 5.96242885 | 5.23E-09   | 1.26E-07   | 9.73570574  |
| BRI3BP      | 1.04984572 | 2.41874161 | 7.06493184 | 6.60E-12   | 2.53E-10   | 16.2451444  |
| CCDC58      | 1.04980719 | 3.57100581 | 8.87148522 | 2.01E-17   | 1.65E-15   | 28.7183538  |
| SNHG3       | 1.04976531 | 3.20434585 | 6.25451993 | 9.72E-10   | 2.63E-08   | 11.3718272  |
| PCGF2       | 1.04973005 | 4.11338527 | 6.4399265  | 3.23E-10   | 9.51E-09   | 12.4440605  |
| GPR87       | 1.04933352 | 3.9816615  | 2.9169163  | 0.00372223 | 0.02270474 | -3.09290046 |
| CTD-2538C1  | 1.04895961 | 2.40150035 | 3.67428153 | 0.00026896 | 0.00237432 | -0.66538366 |
| CLN6        | 1.04672885 | 3.80400593 | 7.76118979 | 6.31E-14   | 3.23E-12   | 20.8027033  |
| TMEM139     | 1.04635667 | 1.78751228 | 3.04568837 | 0.00246579 | 0.01606988 | -2.71770159 |
| CBX3        | 1.04581103 | 5.53239416 | 9.14337596 | 2.51E-18   | 2.24E-16   | 30.7689494  |
| ITPA        | 1.04489668 | 5.08224302 | 8.13765742 | 4.48E-15   | 2.75E-13   | 23.4009047  |
| RPN1        | 1.04423597 | 6.66393575 | 9.31319921 | 6.71E-19   | 6.59E-17   | 32.0707778  |
| PPP4C       | 1.04413003 | 5.88676671 | 8.12932431 | 4.75E-15   | 2.90E-13   | 23.3424144  |
| MND1        | 1.04310527 | 1.97262645 | 6.31119769 | 6.96E-10   | 1.93E-08   | 11.696854   |
| UNC93B1     | 1.04295401 | 4.41882292 | 5.04321763 | 6.79E-07   | 1.10E-05   | 5.02723022  |
| MGAT4B      | 1.04271648 | 4.57197815 | 7.53527723 | 2.96E-13   | 1.37E-11   | 19.2879433  |
| MANEAL      | 1.04264497 | 2.48830555 | 4.03991007 | 6.34E-05   | 0.00065657 | 0.69397207  |
| ADCK5       | 1.04251166 | 2.93904111 | 6.80836352 | 3.37E-11   | 1.16E-09   | 14.6505431  |
| PDIA3       | 1.04203998 | 7.06772783 | 8.44362114 | 4.89E-16   | 3.38E-14   | 25.5783892  |
| XRCC2       | 1.04181288 | 1.36217237 | 7.88793585 | 2.62E-14   | 1.42E-12   | 21.667253   |
| OLR1        | 1.04103402 | 1.97857051 | 2.67618897 | 0.00773399 | 0.04156519 | -3.75244685 |
| PPAPDC1A    | 1.04100086 | 1.15570608 | 3.73133704 | 0.0002163  | 0.0019592  | -0.46118663 |
| MFS10       | 1.04031218 | 5.33137413 | 6.44242708 | 3.19E-10   | 9.38E-09   | 12.4586981  |
| TMEM223     | 1.04021457 | 3.42633284 | 8.50436365 | 3.13E-16   | 2.24E-14   | 26.0175136  |
| SMYD2       | 1.03995274 | 3.38819614 | 7.61630259 | 1.71E-13   | 8.28E-12   | 19.8273239  |
| CNPY2       | 1.03993648 | 3.60555426 | 7.90247965 | 2.36E-14   | 1.30E-12   | 21.7671253  |
| CTA-384D8.3 | 1.03988196 | 1.50953746 | 3.43549879 | 0.00064956 | 0.00512648 | -1.48782392 |
| RFC5        | 1.03907271 | 3.09556028 | 7.61027992 | 1.78E-13   | 8.59E-12   | 19.7870805  |
| CH17-360D5. | 1.03857575 | 2.06719698 | 4.36537255 | 1.60E-05   | 0.00018995 | 2.00409615  |
| RIPPLY3     | 1.03817369 | 1.56928513 | 4.25245202 | 2.60E-05   | 0.00029435 | 1.53897948  |
| HCAR1       | 1.03772667 | 1.84152725 | 3.7281158  | 0.00021899 | 0.00198053 | -0.4727937  |
| RP3-406A7.7 | 1.03761542 | 2.78444415 | 3.88563822 | 0.00011833 | 0.00114536 | 0.10576978  |
| SMPDL3B     | 1.03741361 | 1.83497647 | 3.90446576 | 0.00010978 | 0.00107347 | 0.17641448  |
| EPS8L1      | 1.03585473 | 3.35589548 | 3.25655148 | 0.00121798 | 0.00878606 | -2.06989105 |
| MAD2L2      | 1.03581398 | 3.5958427  | 5.64454334 | 3.03E-08   | 6.31E-07   | 8.03056833  |
| NAA40       | 1.03481928 | 2.82517486 | 8.36041573 | 8.98E-16   | 5.96E-14   | 24.9805162  |
| KIF14       | 1.03397699 | 1.40910211 | 6.60764359 | 1.17E-10   | 3.73E-09   | 13.4361133  |
| ARRDC1      | 1.03307427 | 4.17652988 | 6.06572093 | 2.90E-09   | 7.32E-08   | 10.306785   |
| MREG        | 1.03278776 | 2.81123849 | 5.6439716  | 3.04E-08   | 6.33E-07   | 8.02757356  |
| IRF7        | 1.03273146 | 3.67124389 | 3.7800717  | 0.00017917 | 0.0016563  | -0.28443708 |
| DDR1        | 1.03219372 | 5.17409728 | 4.59023625 | 5.84E-06   | 7.70E-05   | 2.96336763  |
| CTA-384D8.3 | 1.03192664 | 2.87882108 | 5.10450592 | 5.01E-07   | 8.31E-06   | 5.3197425   |
| SLC25A10    | 1.03145493 | 2.55481394 | 5.3432567  | 1.49E-07   | 2.73E-06   | 6.48887327  |
| ETV7        | 1.03111107 | 2.63273323 | 4.05935863 | 5.86E-05   | 0.00061129 | 0.76963127  |
| ZMYND19     | 1.03108485 | 3.74193641 | 7.60476619 | 1.85E-13   | 8.88E-12   | 19.750259   |

|             |            |            |            |            |            |             |
|-------------|------------|------------|------------|------------|------------|-------------|
| DNAJB11     | 1.03094781 | 4.06947336 | 8.76794489 | 4.40E-17   | 3.44E-15   | 27.9485986  |
| PTK7        | 1.03047103 | 3.78922367 | 4.57563273 | 6.24E-06   | 8.19E-05   | 2.89974112  |
| IFIT3       | 1.03033805 | 3.58161033 | 2.74815193 | 0.00624807 | 0.03495316 | -3.56101944 |
| WDR4        | 1.0299953  | 3.07251574 | 7.91494763 | 2.17E-14   | 1.20E-12   | 21.8528518  |
| NDC1        | 1.02971148 | 3.30542727 | 7.51258396 | 3.45E-13   | 1.58E-11   | 19.1376645  |
| AGTRAP      | 1.02726389 | 4.57729415 | 5.74222088 | 1.78E-08   | 3.89E-07   | 8.54602116  |
| PGP         | 1.02722522 | 3.35159819 | 7.51832444 | 3.32E-13   | 1.52E-11   | 19.1756462  |
| PNKP        | 1.02690315 | 3.70267777 | 7.79401249 | 5.03E-14   | 2.63E-12   | 21.0255857  |
| MRPL14      | 1.02678245 | 5.99229516 | 7.07553904 | 6.17E-12   | 2.37E-10   | 16.3120753  |
| CYP4F23P    | 1.02675866 | 1.84487553 | 2.69924942 | 0.00722643 | 0.03931848 | -3.69163839 |
| TRAF2       | 1.02668348 | 3.33849063 | 7.2583567  | 1.87E-12   | 7.82E-11   | 17.4780136  |
| SMUG1       | 1.02649883 | 3.12982144 | 9.13930932 | 2.59E-18   | 2.31E-16   | 30.7379714  |
| MICB        | 1.02641136 | 1.8158224  | 4.52977795 | 7.68E-06   | 9.85E-05   | 2.70114966  |
| DDOST       | 1.02571587 | 6.84337121 | 8.26759672 | 1.76E-15   | 1.13E-13   | 24.3185785  |
| RAD9A       | 1.02548155 | 2.92850876 | 6.46169689 | 2.84E-10   | 8.43E-09   | 12.5716538  |
| VPS9D1-AS1  | 1.02372479 | 1.98217346 | 4.27955662 | 2.32E-05   | 0.00026544 | 1.64960368  |
| CDC42BPG    | 1.02359664 | 3.36336522 | 4.67181355 | 4.01E-06   | 5.49E-05   | 3.32216487  |
| CBX8        | 1.02351245 | 1.95149723 | 7.71218311 | 8.85E-14   | 4.42E-12   | 20.4712394  |
| CASP6       | 1.02332253 | 3.75203848 | 7.00129749 | 9.94E-12   | 3.71E-10   | 15.8452816  |
| HSBP1L1     | 1.02189304 | 3.05492954 | 5.82788244 | 1.11E-08   | 2.52E-07   | 9.00428547  |
| CCT5        | 1.02144335 | 5.46376535 | 5.82799138 | 1.11E-08   | 2.51E-07   | 9.00487195  |
| IGF2BP2     | 1.02103991 | 1.99714575 | 2.78547671 | 0.00558367 | 0.03181995 | -3.45980215 |
| FCHO1       | 1.01932887 | 1.81746514 | 4.84226111 | 1.80E-06   | 2.66E-05   | 4.09018324  |
| CSTB        | 1.01915238 | 7.62181148 | 3.83827718 | 0.0001427  | 0.00135413 | -0.07053142 |
| CA2         | 1.01909812 | 2.60223226 | 2.69068504 | 0.00741132 | 0.0401899  | -3.71428077 |
| FAM96A      | 1.01909421 | 3.90926518 | 9.43382298 | 2.60E-19   | 2.70E-17   | 33.0050416  |
| SIRT7       | 1.01894549 | 3.04017884 | 7.68784686 | 1.05E-13   | 5.19E-12   | 20.3072254  |
| NAT14       | 1.01873457 | 3.30652139 | 4.98831486 | 8.89E-07   | 1.40E-05   | 4.76785598  |
| CDH24       | 1.01856633 | 2.26556673 | 5.51275007 | 6.14E-08   | 1.21E-06   | 7.34716298  |
| RP11-670E13 | 1.01853394 | 2.35550999 | 4.36526421 | 1.60E-05   | 0.00018996 | 2.00364455  |
| CXADR       | 1.01739567 | 3.80256436 | 3.28519186 | 0.00110344 | 0.00808061 | -1.97871819 |
| GSS         | 1.01722792 | 5.5201186  | 7.94310555 | 1.78E-14   | 1.00E-12   | 22.0468266  |
| CYBA        | 1.01686498 | 5.29935014 | 3.99556338 | 7.61E-05   | 0.00077264 | 0.52271241  |
| APIG2       | 1.01650466 | 3.36621625 | 5.37575307 | 1.26E-07   | 2.34E-06   | 6.65162133  |
| TSEN54      | 1.01626458 | 3.9373763  | 7.95544879 | 1.63E-14   | 9.19E-13   | 22.1320178  |
| SLC25A22    | 1.01526685 | 3.15210944 | 7.20940034 | 2.58E-12   | 1.05E-10   | 17.163508   |
| CAMSAP3     | 1.01418887 | 3.05238214 | 4.28552255 | 2.26E-05   | 0.00025917 | 1.67403947  |
| ECE2        | 1.0134034  | 1.69011205 | 7.86679045 | 3.03E-14   | 1.63E-12   | 21.5222917  |
| RPA3        | 1.01276805 | 3.23578853 | 6.91490793 | 1.72E-11   | 6.21E-10   | 15.307026   |
| FBXW9       | 1.01269471 | 2.98556167 | 8.34222833 | 1.03E-15   | 6.75E-14   | 24.8503949  |
| PLEKHJ1     | 1.01204065 | 3.90209533 | 7.04260684 | 7.62E-12   | 2.89E-10   | 16.1045339  |
| ENTPD6      | 1.01139862 | 4.1007204  | 7.54919108 | 2.69E-13   | 1.26E-11   | 19.3802544  |
| MARVELD3    | 1.01130857 | 2.00855273 | 5.91370655 | 6.87E-09   | 1.62E-07   | 9.46920725  |
| TPM3        | 1.01122849 | 5.5115274  | 7.36112289 | 9.50E-13   | 4.13E-11   | 18.143581   |
| AP2S1       | 1.01053578 | 5.94055919 | 6.91200628 | 1.76E-11   | 6.32E-10   | 15.2890394  |
| PIF1        | 1.00977225 | 1.53086568 | 7.00238049 | 9.87E-12   | 3.69E-10   | 15.8520629  |
| RUVBL1      | 1.0077824  | 3.50538333 | 7.42972371 | 6.01E-13   | 2.68E-11   | 18.5918995  |
| EDEM2       | 1.00749244 | 4.53317972 | 7.99378093 | 1.24E-14   | 7.13E-13   | 22.3972034  |
| TUBB        | 1.00585542 | 8.12859995 | 6.59542158 | 1.26E-10   | 4.01E-09   | 13.363117   |
| AATBC       | 1.00535874 | 1.88028869 | 3.08994562 | 0.00213329 | 0.01418312 | -2.58516801 |
| ACYPI       | 1.00473703 | 2.5938072  | 7.22273389 | 2.37E-12   | 9.69E-11   | 17.2490009  |
| MYDGF       | 1.00465656 | 5.91853868 | 7.37789102 | 8.50E-13   | 3.71E-11   | 18.2528674  |
| MFI2-AS1    | 1.00430468 | 1.8263659  | 5.43279449 | 9.35E-08   | 1.78E-06   | 6.93937504  |
| MIR210HG    | 1.00377997 | 2.20940622 | 4.34281275 | 1.76E-05   | 0.00020767 | 1.91028103  |
| LINC01518   | 1.00320743 | 1.08622867 | 3.12633924 | 0.00189133 | 0.01278265 | -2.47481385 |
| ERBB2       | 1.00259603 | 5.09141748 | 3.17648454 | 0.00159925 | 0.01108448 | -2.32074095 |
| UCK2        | 1.00229453 | 2.99580327 | 6.40492899 | 3.99E-10   | 1.15E-08   | 12.2396869  |
| METTL7B     | 1.00217713 | 1.48277687 | 3.48795226 | 0.00053743 | 0.00434609 | -1.31162369 |

|        |            |            |            |          |          |            |
|--------|------------|------------|------------|----------|----------|------------|
| POLE2  | 1.00209833 | 1.6885146  | 7.22155917 | 2.39E-12 | 9.75E-11 | 17.2414638 |
| POLR2G | 1.00201718 | 5.18687418 | 8.51009564 | 3.00E-16 | 2.16E-14 | 26.059067  |
| ENO1   | 1.00161163 | 8.53271051 | 5.73674078 | 1.83E-08 | 3.99E-07 | 8.51690155 |
| KIF18A | 1.0002719  | 1.42685059 | 6.53606342 | 1.81E-10 | 5.61E-09 | 13.0101652 |
| DBI    | 1.00018061 | 5.84351232 | 5.3979574  | 1.12E-07 | 2.11E-06 | 6.76331983 |
| NAT9   | 1.0001367  | 3.44856134 | 8.51407699 | 2.91E-16 | 2.10E-14 | 26.0879409 |

---

# Supplementary Table S3

|               | logFC        | AveExpr     | t            | P.Value     | adj.P.Val   | B            |
|---------------|--------------|-------------|--------------|-------------|-------------|--------------|
| KITLG         | -1.000106989 | 1.866386203 | -3.970794439 | 8.41E-05    | 0.000845941 | 0.427821835  |
| MYH3          | -1.000778882 | 0.654330481 | -6.253693503 | 9.77E-10    | 2.64E-08    | 11.36710601  |
| COLCA1        | -1.002344931 | 1.207337165 | -3.43507543  | 0.000650545 | 0.005133581 | -1.489235796 |
| SH3D19        | -1.003536628 | 2.659421452 | -6.744064063 | 5.04E-11    | 1.69E-09    | 14.25831556  |
| PTGER4        | -1.003692238 | 2.139118564 | -4.071754555 | 5.56E-05    | 0.00058467  | 0.818029568  |
| PRSS23        | -1.003717409 | 3.120703858 | -4.002265259 | 7.40E-05    | 0.000754081 | 0.548481598  |
| GPM6B         | -1.003884406 | 0.86989705  | -7.597287256 | 1.94E-13    | 9.28E-12    | 19.70034604  |
| MPEG1         | -1.003891424 | 1.958956584 | -3.640738762 | 0.000305324 | 0.002647301 | -0.784052507 |
| EPB41L2       | -1.003954675 | 1.862882345 | -5.529117721 | 5.62E-08    | 1.12E-06    | 7.43127759   |
| INPP5A        | -1.004648596 | 3.10199096  | -6.961096622 | 1.28E-11    | 4.73E-10    | 15.59414695  |
| MEG3          | -1.006374094 | 0.888234072 | -5.207397177 | 2.99E-07    | 5.14E-06    | 5.817826463  |
| CYS1          | -1.008979474 | 0.758603188 | -6.500607344 | 2.24E-10    | 6.83E-09    | 12.80058181  |
| PNRC1         | -1.009215285 | 4.512708946 | -5.946565285 | 5.71E-09    | 1.37E-07    | 9.648732994  |
| FSTL1         | -1.009281788 | 4.543430295 | -3.638132894 | 0.000308334 | 0.002670626 | -0.793228861 |
| ZFP36L1       | -1.010867072 | 6.171919074 | -5.286072892 | 2.00E-07    | 3.58E-06    | 6.204581107  |
| PYGB          | -1.011496188 | 5.141796079 | -5.018524544 | 7.67E-07    | 1.23E-05    | 4.910262102  |
| MAP3K8        | -1.012310996 | 2.645810549 | -5.433021828 | 9.34E-08    | 1.77E-06    | 6.940527186  |
| GABARAPL1     | -1.012865752 | 3.68272068  | -5.591610021 | 4.03E-08    | 8.20E-07    | 7.754412281  |
| JDP2          | -1.013035006 | 2.087119333 | -5.444762924 | 8.78E-08    | 1.67E-06    | 7.000086954  |
| RP11-514D23.3 | -1.013322836 | 0.437620814 | -10.42054904 | 8.47E-23    | 1.30E-20    | 40.93026914  |
| INHBB         | -1.016949362 | 1.707701062 | -4.536211366 | 7.46E-06    | 9.59E-05    | 2.728902596  |
| MEF2D         | -1.018211752 | 3.236746255 | -9.462900006 | 2.07E-19    | 2.17E-17    | 33.23142601  |
| TSPAN11       | -1.019344967 | 0.820341512 | -6.673848034 | 7.79E-11    | 2.55E-09    | 13.83342689  |
| MITF          | -1.019400447 | 0.920008314 | -7.44426329  | 5.46E-13    | 2.44E-11    | 18.68732935  |
| AR            | -1.02087991  | 0.966052001 | -4.572260848 | 6.33E-06    | 8.30E-05    | 2.885076155  |
| STK40         | -1.021666591 | 3.233252063 | -7.547580327 | 2.72E-13    | 1.27E-11    | 19.36956121  |
| ARRDC4        | -1.021745488 | 2.297380656 | -5.063743927 | 6.13E-07    | 1.00E-05    | 5.124848148  |
| STEAP4        | -1.022011578 | 1.215583334 | -4.285983826 | 2.25E-05    | 0.000258702 | 1.675930095  |
| ROR1          | -1.022364142 | 0.457448928 | -9.18398942  | 1.83E-18    | 1.68E-16    | 31.07883189  |
| GHR           | -1.023558225 | 0.408398198 | -9.2689309   | 9.48E-19    | 9.15E-17    | 31.72989464  |
| TBL1X         | -1.026047231 | 2.461365301 | -5.715305791 | 2.06E-08    | 4.45E-07    | 8.403231238  |
| SCN4B         | -1.026698407 | 0.567120018 | -9.072213571 | 4.35E-18    | 3.76E-16    | 30.2281998   |
| TLE2          | -1.02718075  | 3.373143056 | -2.947108594 | 0.003383995 | 0.020956867 | -3.006325487 |
| LEPR          | -1.028155294 | 0.709451886 | -9.821244652 | 1.18E-20    | 1.44E-18    | 36.05803339  |
| PLEKHO2       | -1.029249549 | 3.192093548 | -5.648467413 | 2.97E-08    | 6.19E-07    | 8.051129587  |
| MICU3         | -1.029298172 | 0.308999824 | -14.16633446 | 1.35E-37    | 9.87E-35    | 74.64857636  |
| KLRB1         | -1.029550757 | 1.005300042 | -5.729036909 | 1.91E-08    | 4.15E-07    | 8.476005799  |
| NFKBIZ        | -1.029934182 | 2.556970997 | -4.634088945 | 4.77E-06    | 6.42E-05    | 3.155532874  |
| RBP1          | -1.030640273 | 2.263530207 | -3.053095308 | 0.002407017 | 0.015746613 | -2.695648096 |
| PTPLA         | -1.031136875 | 1.082162435 | -5.570107408 | 4.52E-08    | 9.14E-07    | 7.642872793  |
| UGCG          | -1.031352636 | 3.877394525 | -5.921981305 | 6.56E-09    | 1.55E-07    | 9.514337547  |
| AHNAK2        | -1.031770498 | 1.579346892 | -3.078916256 | 0.002212051 | 0.014638446 | -2.618367806 |
| NCOA7         | -1.03296022  | 2.738293857 | -4.773831482 | 2.49E-06    | 3.56E-05    | 3.778876989  |
| LINC00641     | -1.03345129  | 0.925619106 | -9.784376774 | 1.59E-20    | 1.89E-18    | 35.76414058  |
| GNA14         | -1.033701026 | 1.247850305 | -4.5071195   | 8.50E-06    | 0.000108064 | 2.603688809  |
| FKBP5         | -1.033896906 | 2.236075219 | -3.932757564 | 9.80E-05    | 0.000970068 | 0.283168253  |
| ALDH1L1       | -1.033845375 | 1.631542424 | -3.222911093 | 0.001366558 | 0.009693749 | -2.176010736 |
| RP11-798K23.5 | -1.036659528 | 1.141135033 | -6.002691601 | 4.16E-09    | 1.02E-07    | 9.957326487  |
| WNT9A         | -1.037716522 | 1.368751199 | -5.253839731 | 2.36E-07    | 4.16E-06    | 6.045513551  |
| NEURL1B       | -1.039492354 | 2.28063979  | -4.826095623 | 1.94E-06    | 2.84E-05    | 4.016283578  |
| CIQTNF2       | -1.041549225 | 0.621663469 | -9.390760744 | 3.65E-19    | 3.69E-17    | 32.67060854  |
| RP11-102K13.5 | -1.041654254 | 0.202285499 | -8.85082181  | 2.36E-17    | 1.91E-15    | 28.56423789  |
| LRIG1         | -1.041735981 | 1.652083185 | -4.041546303 | 6.30E-05    | 0.000652703 | 0.700324411  |
| DYNC1I1       | -1.042091872 | 1.162557973 | -5.255528246 | 2.34E-07    | 4.13E-06    | 6.053825028  |
| TMEM220       | -1.04227284  | 0.610091048 | -10.96603094 | 8.21E-25    | 1.60E-22    | 45.51189707  |
| FAM46C        | -1.04462024  | 1.594688598 | -5.269270467 | 2.18E-07    | 3.88E-06    | 6.121556303  |
| TUB           | -1.045827415 | 0.732387638 | -7.430512187 | 5.98E-13    | 2.67E-11    | 18.59707093  |
| FYN           | -1.046804434 | 2.126755351 | -5.152356297 | 3.94E-07    | 6.66E-06    | 5.550289914  |
| PBXIP1        | -1.047040794 | 5.339444052 | -5.989886085 | 4.47E-09    | 1.09E-07    | 9.886703787  |
| CPEB4         | -1.047371296 | 1.667437944 | -7.589030221 | 2.05E-13    | 9.78E-12    | 19.6452835   |
| CDKN1C        | -1.047548054 | 2.874535591 | -3.597718449 | 0.000358741 | 0.003061807 | -0.934754394 |
| AC002398.12   | -1.047736702 | 0.185487225 | -12.80214004 | 5.71E-32    | 2.45E-29    | 61.81886289  |
| TTL7          | -1.048163184 | 0.766215441 | -7.681074799 | 1.10E-13    | 5.43E-12    | 20.26165466  |
| MPP7          | -1.048712988 | 2.155048112 | -4.942582339 | 1.11E-06    | 1.72E-05    | 4.553731831  |
| NPR2          | -1.05036083  | 1.333788298 | -7.748592086 | 6.89E-14    | 3.50E-12    | 20.71734613  |
| MEIS2         | -1.050499239 | 1.31874562  | -7.205676542 | 2.65E-12    | 1.07E-10    | 17.13965361  |
| BCL2          | -1.050834934 | 1.080142868 | -7.361154135 | 9.50E-13    | 4.13E-11    | 18.14378447  |
| TMEM246       | -1.052116909 | 1.314821398 | -4.710229459 | 3.36E-06    | 4.67E-05    | 3.493102125  |
| LDB3          | -1.053235558 | 0.34339145  | -10.53692998 | 3.18E-23    | 5.14E-21    | 41.89643235  |

|               |              |             |              |             |             |              |
|---------------|--------------|-------------|--------------|-------------|-------------|--------------|
| AL031587.1    | -1.053546606 | 3.150395773 | -4.468465693 | 1.01E-05    | 0.000126105 | 2.43845241   |
| PITX2         | -1.054500734 | 1.000565718 | -5.80832504  | 1.24E-08    | 2.78E-07    | 8.899149246  |
| TXNIP         | -1.054714227 | 6.708401372 | -3.762732419 | 0.00019163  | 0.001760063 | -0.347568584 |
| PROS1         | -1.055817584 | 1.903089704 | -5.031255631 | 7.20E-07    | 1.16E-05    | 4.970504091  |
| NFIC          | -1.055935621 | 3.177719314 | -6.578243346 | 1.40E-10    | 4.43E-09    | 13.26070554  |
| LINC01133     | -1.059080755 | 1.447475987 | -2.971904172 | 0.003127486 | 0.019607484 | -2.9345855   |
| FAM110D       | -1.059322168 | 0.961746204 | -7.858359213 | 3.22E-14    | 1.72E-12    | 21.4645725   |
| LRR4C4B       | -1.060258494 | 0.557430309 | -7.771551479 | 5.88E-14    | 3.03E-12    | 20.8729881   |
| REEP2         | -1.06030927  | 0.965601688 | -5.525355303 | 5.74E-08    | 1.13E-06    | 7.411923126  |
| ZFPM2         | -1.060753383 | 0.53581358  | -9.365827352 | 4.44E-19    | 4.43E-17    | 32.47742702  |
| CHRM3         | -1.06096854  | 0.461813318 | -8.370427031 | 8.35E-16    | 5.56E-14    | 25.05222855  |
| PRKAG2        | -1.062373145 | 1.901202987 | -8.132635005 | 4.64E-15    | 2.84E-13    | 23.365647    |
| NT5DC3        | -1.062566916 | 1.177517923 | -7.34583951  | 1.05E-12    | 4.52E-11    | 18.04413894  |
| CXCR4         | -1.063334403 | 3.790108691 | -3.513219473 | 0.000490128 | 0.004016439 | -1.225847167 |
| FAM180A       | -1.063976861 | 0.37189411  | -9.869397342 | 7.97E-21    | 9.99E-19    | 36.442928    |
| AC114498.1    | -1.064446505 | 2.12535057  | -3.487016866 | 0.000539257 | 0.004358475 | -1.314787932 |
| NRP2          | -1.065031677 | 1.705995481 | -4.436225628 | 1.17E-05    | 0.000143236 | 2.30162411   |
| LAMA4         | -1.065446144 | 2.459226898 | -4.546631904 | 7.12E-06    | 9.20E-05    | 2.773931272  |
| DAAM2         | -1.065617491 | 0.897307938 | -7.251697709 | 1.96E-12    | 8.14E-11    | 17.43513743  |
| ITGB1BP2      | -1.067320004 | 0.70586074  | -9.368788387 | 4.34E-19    | 4.34E-17    | 32.50035121  |
| PAM           | -1.067751179 | 3.129054161 | -4.946072182 | 1.09E-06    | 1.69E-05    | 4.570009735  |
| RP11-703I16.1 | -1.067870748 | 1.294972519 | -6.367573089 | 4.98E-10    | 1.41E-08    | 12.02255328  |
| MUC21         | -1.068315705 | 0.303704516 | -5.01578481  | 7.77E-07    | 1.24E-05    | 4.897315722  |
| RP11-401P9.4  | -1.068510582 | 0.62502669  | -6.984732513 | 1.10E-11    | 4.11E-10    | 15.74166127  |
| HSPB2         | -1.068677035 | 0.560007446 | -9.376082795 | 4.10E-19    | 4.11E-17    | 32.55684444  |
| UTRN          | -1.068701448 | 1.709068653 | -6.34980167  | 5.54E-10    | 1.56E-08    | 11.91962361  |
| GPC3          | -1.072383028 | 1.824525722 | -3.109945177 | 0.001997011 | 0.013402241 | -2.524677353 |
| CD93          | -1.073363854 | 2.857991783 | -4.626349509 | 4.95E-06    | 6.64E-05    | 3.121498141  |
| ITGA1         | -1.07405927  | 1.588118483 | -6.076644935 | 2.73E-09    | 6.92E-08    | 10.36766376  |
| PER3          | -1.074703615 | 1.498852006 | -6.26755109  | 9.00E-10    | 2.45E-08    | 11.44634094  |
| RND1          | -1.074758053 | 1.120866486 | -6.179403066 | 1.51E-09    | 3.98E-08    | 10.94481735  |
| SOWAHC        | -1.075202853 | 3.444447341 | -4.695933407 | 3.59E-06    | 4.95E-05    | 3.429342364  |
| LATS2         | -1.075275521 | 2.098058384 | -6.709359046 | 6.25E-11    | 2.07E-09    | 14.0478609   |
| TMTC1         | -1.07532792  | 0.807298509 | -6.283647653 | 8.19E-10    | 2.25E-08    | 11.53856063  |
| LDLR          | -1.075854222 | 3.017135108 | -3.913762901 | 0.000105777 | 0.001037982 | 0.211416392  |
| TNNT2         | -1.076023119 | 0.638784158 | -6.517783627 | 2.02E-10    | 6.21E-09    | 12.90199567  |
| PARD3B        | -1.076050517 | 0.732846595 | -9.381340879 | 3.93E-19    | 3.96E-17    | 32.59758477  |
| PARVA         | -1.076610668 | 3.00395582  | -6.773243132 | 4.20E-11    | 1.43E-09    | 14.43593726  |
| KLHL13        | -1.077635596 | 0.654934925 | -7.7900491   | 5.17E-14    | 2.70E-12    | 20.99863489  |
| EPM2A         | -1.079836673 | 0.841851241 | -11.30981389 | 4.13E-26    | 9.21E-24    | 48.46623391  |
| CDC42EP3      | -1.082116337 | 2.296172955 | -5.433352821 | 9.33E-08    | 1.77E-06    | 6.942204705  |
| NCKAP1L       | -1.083963115 | 1.274581347 | -4.797129593 | 2.23E-06    | 3.23E-05    | 3.884420812  |
| CACNA1C       | -1.08523936  | 0.573635553 | -8.416241656 | 5.98E-16    | 4.06E-14    | 25.3811874   |
| PPP1R12A      | -1.086856027 | 2.598790657 | -8.027230079 | 9.82E-15    | 5.77E-13    | 22.62937586  |
| CLMP          | -1.087061663 | 1.914449136 | -3.677090487 | 0.000266108 | 0.002352343 | -0.655399684 |
| RGN           | -1.087680015 | 0.47561093  | -8.499095939 | 3.25E-16    | 2.32E-14    | 25.9793435   |
| CDO1          | -1.089732774 | 0.51193222  | -6.840247018 | 2.76E-11    | 9.63E-10    | 14.84614073  |
| TBX5          | -1.090912047 | 0.451760969 | -9.323799565 | 6.17E-19    | 6.10E-17    | 32.15256371  |
| SLC25A4       | -1.091768467 | 2.645869318 | -6.978192812 | 1.15E-11    | 4.27E-10    | 15.70080652  |
| LAMB2         | -1.092088709 | 4.357735128 | -4.91815701  | 1.25E-06    | 1.91E-05    | 4.440089833  |
| CBX6          | -1.094324326 | 2.847701559 | -4.747031177 | 2.82E-06    | 4.00E-05    | 3.658038496  |
| FAM50B        | -1.09510195  | 1.55252326  | -4.613429696 | 5.25E-06    | 6.99E-05    | 3.064796906  |
| MAPRE2        | -1.098418349 | 2.190577138 | -5.82916807  | 1.10E-08    | 2.50E-07    | 9.011207296  |
| SGCB          | -1.099183792 | 2.65060041  | -5.759374061 | 1.62E-08    | 3.56E-07    | 8.637321609  |
| ANGPTL7       | -1.099590867 | 0.185224592 | -12.66549934 | 2.03E-31    | 8.45E-29    | 60.56386446  |
| DLC1          | -1.101771717 | 1.440704921 | -6.595384037 | 1.26E-10    | 4.01E-09    | 13.36289297  |
| PECAM1        | -1.102964146 | 3.488543624 | -4.744495665 | 2.86E-06    | 4.03E-05    | 3.646637921  |
| ARHGEF26      | -1.105449507 | 1.168683046 | -6.314123868 | 6.84E-10    | 1.89E-08    | 11.71370055  |
| COL21A1       | -1.105709573 | 0.462293701 | -8.472997802 | 3.94E-16    | 2.77E-14    | 25.79048226  |
| CTSF          | -1.105756781 | 3.707937531 | -4.589820544 | 5.85E-06    | 7.72E-05    | 2.961553881  |
| CYYR1         | -1.106079932 | 1.733377624 | -6.824263516 | 3.05E-11    | 1.06E-09    | 14.74799418  |
| ABL1          | -1.107037866 | 3.761111788 | -7.601195503 | 1.89E-13    | 9.06E-12    | 19.72642429  |
| IGSF10        | -1.108034881 | 0.229547326 | -11.71066878 | 1.19E-27    | 3.09E-25    | 51.97203053  |
| TMEM47        | -1.111732959 | 3.115655217 | -3.516878995 | 0.00048361  | 0.003974179 | -1.213375477 |
| FOXN3         | -1.111893398 | 2.417113578 | -7.802653441 | 4.74E-14    | 2.48E-12    | 21.0843792   |
| MYCT1         | -1.113605309 | 1.297125294 | -7.389968274 | 7.84E-13    | 3.43E-11    | 18.33169992  |
| ADRB3         | -1.114700875 | 0.220480919 | -12.14289519 | 2.44E-29    | 7.88E-27    | 55.82123018  |
| ZEB2          | -1.114736321 | 0.887384678 | -8.309439605 | 1.30E-15    | 8.47E-14    | 24.61632267  |
| WEE1          | -1.115035798 | 2.768394826 | -6.462061238 | 2.83E-10    | 8.42E-09    | 12.57379216  |
| PDE7B         | -1.116226224 | 0.925276822 | -7.040635146 | 7.72E-12    | 2.93E-10    | 16.09213236  |

|               |              |             |               |             |             |              |
|---------------|--------------|-------------|---------------|-------------|-------------|--------------|
| GAS1          | -1.117097434 | 1.831895731 | -3.283145997  | 0.00111128  | 0.008126793 | -1.985256091 |
| HSPG2         | -1.117792804 | 3.238666222 | -4.474429775  | 9.85E-06    | 0.000123239 | 2.463863081  |
| ARHGEF37      | -1.118266391 | 1.409526439 | -6.108923039  | 2.27E-09    | 5.82E-08    | 10.54808455  |
| C1orf21       | -1.118731646 | 2.440076618 | -6.527537245  | 1.91E-10    | 5.88E-09    | 12.95968131  |
| LRCH2         | -1.118854921 | 0.630173891 | -8.38821291   | 7.34E-16    | 4.92E-14    | 25.17978261  |
| S100B         | -1.119083152 | 1.47953914  | -4.535192915  | 7.49E-06    | 9.62E-05    | 2.724506749  |
| PTPRN2        | -1.119585385 | 0.870093759 | -6.214663149  | 1.23E-09    | 3.29E-08    | 11.14472207  |
| SPRY2         | -1.119912084 | 2.34241924  | -4.947286388  | 1.09E-06    | 1.69E-05    | 4.575675634  |
| MORN5         | -1.121604069 | 0.175666248 | -12.18908238  | 1.60E-29    | 5.29E-27    | 56.23658207  |
| OAT           | -1.124195672 | 3.458846121 | -3.424867158  | 0.000674796 | 0.005298458 | -1.523229713 |
| ODF3L1        | -1.125846501 | 0.433281629 | -11.33600738  | 3.29E-26    | 7.38E-24    | 48.6933507   |
| WNT5B         | -1.125873211 | 1.656262791 | -3.979216487  | 8.13E-05    | 0.000821674 | 0.460025535  |
| SOX7          | -1.125902325 | 1.572444946 | -4.272436319  | 2.39E-05    | 0.000272741 | 1.62048056   |
| CHRD2         | -1.126992398 | 1.415262118 | -3.180059707  | 0.001580111 | 0.010968723 | -2.309666842 |
| EHD2          | -1.12726649  | 4.627151728 | -3.944561898  | 9.35E-05    | 0.000931268 | 0.327921513  |
| CDKN1A        | -1.128008965 | 6.079818962 | -4.32385091   | 1.91E-05    | 0.0002236   | 1.831772069  |
| PTH1R         | -1.12886355  | 0.499815359 | -10.63495882  | 1.39E-23    | 2.34E-21    | 42.71509542  |
| DUSP8         | -1.129509701 | 1.105549514 | -7.076714998  | 6.12E-12    | 2.35E-10    | 16.31950037  |
| ATOX8         | -1.12955501  | 1.140702674 | -4.199410761  | 3.26E-05    | 0.00036096  | 1.324366376  |
| CRNN          | -1.129865128 | 0.243933035 | -4.427821643  | 1.21E-05    | 0.000148146 | 2.266105527  |
| PNMA1         | -1.130661576 | 3.465370744 | -4.775859833  | 2.47E-06    | 3.53E-05    | 3.788047384  |
| CD79B         | -1.132370149 | 1.276922894 | -4.146472376  | 4.08E-05    | 0.000442199 | 1.112641856  |
| FMOD          | -1.133062022 | 3.02616016  | -3.45313342   | 0.000609626 | 0.004850674 | -1.428867728 |
| LDB2          | -1.134024453 | 1.274290013 | -7.824468977  | 4.07E-14    | 2.15E-12    | 21.23303011  |
| HIPK3         | -1.135125382 | 3.061831377 | -7.613980233  | 1.73E-13    | 8.40E-12    | 19.81180309  |
| LRRC32        | -1.135621271 | 2.612207736 | -4.339769266  | 1.78E-05    | 0.000210113 | 1.897658728  |
| ATP8B2        | -1.137329869 | 1.613521959 | -5.526718374  | 5.70E-08    | 1.13E-06    | 7.418933659  |
| ADAMTSL4      | -1.137348573 | 2.009300892 | -3.71100313   | 0.00023384  | 0.002098877 | -0.534298218 |
| NAPIL2        | -1.137642321 | 0.789420853 | -8.078204929  | 6.84E-15    | 4.10E-13    | 22.98456508  |
| PLEKHO1       | -1.137685786 | 3.058745945 | -4.796630886  | 2.24E-06    | 3.23E-05    | 3.882156772  |
| CACNB2        | -1.138207009 | 0.485666532 | -10.16385187  | 7.16E-22    | 1.02E-19    | 38.82186742  |
| RP11-617F23.1 | -1.1382845   | 1.039672656 | -8.443588945  | 4.89E-16    | 3.38E-14    | 25.57815705  |
| MT-ND6        | -1.138740516 | 10.37017663 | -3.330756762  | 0.000941626 | 0.007052172 | -1.832105522 |
| RGCC          | -1.139583699 | 3.774367587 | -5.318109386  | 1.70E-07    | 3.08E-06    | 6.363522485  |
| OXER1         | -1.143490471 | 0.96702127  | -7.653751337  | 1.32E-13    | 6.50E-12    | 20.07809739  |
| CDC42EP2      | -1.144622019 | 2.914997793 | -5.355202239  | 1.40E-07    | 2.58E-06    | 6.548598691  |
| RCSD1         | -1.146447723 | 1.290601087 | -5.768991675  | 1.54E-08    | 3.39E-07    | 8.688614677  |
| RP11-404P21.9 | -1.147319564 | 0.746392525 | -7.189733174  | 2.94E-12    | 1.18E-10    | 17.03763025  |
| FAM46A        | -1.147618984 | 2.307268762 | -6.534970355  | 1.82E-10    | 5.64E-09    | 13.00369014  |
| OSR1          | -1.148508129 | 1.921665459 | -3.735774835  | 0.000212638 | 0.001928742 | -0.445180589 |
| PCDH18        | -1.148852896 | 1.042939939 | -7.194175741  | 2.85E-12    | 1.15E-10    | 17.06604096  |
| SCUBE2        | -1.149248605 | 2.328579504 | -2.627218948  | 0.008919511 | 0.04671123  | -3.879903088 |
| TMEM132C      | -1.149258266 | 0.156302799 | -16.70987812  | 1.47E-48    | 3.74E-45    | 99.66915626  |
| ZBTB16        | -1.151201861 | 0.2693638   | -12.12196542  | 2.95E-29    | 9.42E-27    | 55.63326332  |
| KIAA0513      | -1.152328103 | 1.493948085 | -7.404145705  | 7.13E-13    | 3.15E-11    | 18.4243679   |
| NRN1          | -1.153991249 | 1.506453198 | -4.307550011  | 2.05E-05    | 0.00023793  | 1.764531783  |
| MIR24-2       | -1.153994406 | 0.364738191 | -8.63415187   | 1.20E-16    | 9.07E-15    | 26.96322814  |
| PPP1R15A      | -1.156787592 | 5.386755012 | -5.6768414228 | 1.54E-08    | 3.40E-07    | 8.685532949  |
| CPEB2         | -1.157400912 | 1.42558559  | -8.723833164  | 6.13E-17    | 4.73E-15    | 27.62255593  |
| TCEAL1        | -1.157630379 | 3.533712681 | -6.65410442   | 8.79E-11    | 2.86E-09    | 13.71460314  |
| ENPP2         | -1.15797788  | 1.74970226  | -4.703664685  | 3.46E-06    | 4.80E-05    | 3.463801848  |
| TBX4          | -1.158602492 | 0.561423378 | -6.791862246  | 3.74E-11    | 1.28E-09    | 14.54959972  |
| CTSK          | -1.158724428 | 4.683293    | -2.985901715  | 0.002990661 | 0.018865141 | -2.89383243  |
| LGALS4        | -1.159027309 | 1.379689371 | -2.70822036   | 0.007037226 | 0.03849377  | -3.667846572 |
| SEMA3G        | -1.160747335 | 1.244540356 | -7.695808572  | 9.90E-14    | 4.93E-12    | 20.36084022  |
| RBMS3         | -1.163001387 | 0.686933012 | -9.499850345  | 1.54E-19    | 1.66E-17    | 33.51976274  |
| SEMA3E        | -1.165089349 | 0.543166238 | -8.832250539  | 2.71E-17    | 2.19E-15    | 28.42593682  |
| TRPA1         | -1.165197716 | 0.741346315 | -5.656494204  | 2.84E-08    | 5.96E-07    | 8.093226419  |
| NGFR          | -1.166080981 | 1.18567002  | -4.149458285  | 4.03E-05    | 0.000437342 | 1.124517995  |
| SERPINE2      | -1.166285633 | 1.682646155 | -3.920109244  | 0.000103125 | 0.001014513 | 0.235353607  |
| FBN1          | -1.166294906 | 1.946156427 | -4.076960285  | 5.45E-05    | 0.000573356 | 0.838395354  |
| PBX1          | -1.166633665 | 2.275084701 | -5.646864804  | 2.99E-08    | 6.24E-07    | 8.042730795  |
| COL16A1       | -1.16782382  | 2.759385272 | -3.629028579  | 0.000319072 | 0.002753826 | -0.825240513 |
| GALNT15       | -1.168891187 | 0.610745019 | -7.541758767  | 2.83E-13    | 1.32E-11    | 19.33092871  |
| SERPING1      | -1.17059027  | 5.362325638 | -3.102367366  | 0.002047674 | 0.013699727 | -2.547641077 |
| STOM          | -1.171155094 | 5.141816224 | -3.974384612  | 8.29E-05    | 0.000836039 | 0.441541971  |
| ARL4D         | -1.171655788 | 3.876712182 | -3.663916297  | 0.000279738 | 0.002456096 | -0.702163228 |
| MEIS1         | -1.171941689 | 1.396764127 | -8.560128267  | 2.07E-16    | 1.53E-14    | 26.42261175  |
| RUSC2         | -1.175017497 | 2.163535013 | -6.48079695   | 2.53E-10    | 7.61E-09    | 12.68388744  |
| RECK          | -1.176302811 | 0.957369303 | -8.973640661  | 9.26E-18    | 7.80E-16    | 29.48387949  |

|               |               |             |              |             |             |              |
|---------------|---------------|-------------|--------------|-------------|-------------|--------------|
| HAND2-AS1     | -1.176794284  | 0.206035309 | -13.91096415 | 1.59E-36    | 1.07E-33    | 72.20875145  |
| SYNE1         | -1.178464287  | 0.642206918 | -11.8120142  | 4.83E-28    | 1.31E-25    | 52.8683139   |
| KCNJ8         | -1.178916383  | 1.55841378  | -5.453703133 | 8.38E-08    | 1.61E-06    | 7.045513423  |
| CRISP3        | -1.179541237  | 1.019299351 | -3.245082448 | 0.001266867 | 0.009084813 | -2.106188278 |
| OSBPL10       | -1.180512247  | 1.507593143 | -7.531907092 | 3.02E-13    | 1.40E-11    | 19.26560376  |
| ILK           | -1.180609016  | 1.80262756  | -8.064117749 | 7.56E-15    | 4.51E-13    | 22.8862416   |
| ETS2          | -1.181553817  | 5.478912207 | -4.922840108 | 1.22E-06    | 1.88E-05    | 4.461839658  |
| LSP1          | -1.182278952  | 3.291202421 | -3.309482734 | 0.001014217 | 0.007516766 | -1.900796916 |
| ATP1B2        | -1.183024556  | 0.554128723 | -11.45745648 | 1.13E-26    | 2.67E-24    | 49.75004525  |
| CACNA2D1      | -1.184073719  | 0.824313284 | -6.640830373 | 9.54E-11    | 3.09E-09    | 13.63487588  |
| JUND          | -1.184420227  | 6.40442784  | -6.005580351 | 4.09E-09    | 1.00E-07    | 9.973275586  |
| ADRA2A        | -1.186080227  | 0.949619847 | -6.368896729 | 4.94E-10    | 1.40E-08    | 12.03022912  |
| NFIB          | -1.186126196  | 2.032773785 | -5.984921801 | 4.60E-09    | 1.12E-07    | 9.859359874  |
| MSX1          | -1.186529841  | 1.420875716 | -5.448297189 | 8.62E-08    | 1.65E-06    | 7.018037315  |
| SCN7A         | -1.187669494  | 0.183130736 | -14.11972771 | 2.12E-37    | 1.53E-34    | 74.20209828  |
| FAM149A       | -1.188163716  | 0.859141953 | -7.330705105 | 1.16E-12    | 4.97E-11    | 17.94582382  |
| NAPIL5        | -1.188803171  | 1.586187175 | -8.180546446 | 3.30E-15    | 2.06E-13    | 23.70263392  |
| DOK6          | -1.18902661   | 0.296348759 | -11.64961579 | 2.06E-27    | 5.22E-25    | 51.43398691  |
| COL6A3        | -1.189235049  | 3.997365084 | -3.005977767 | 0.002803973 | 0.017898278 | -2.835061672 |
| THRA          | -1.189972971  | 2.236554479 | -7.344261141 | 1.06E-12    | 4.57E-11    | 18.03387831  |
| PDLIM7        | -1.191275568  | 4.009211268 | -4.794678806 | 2.26E-06    | 3.26E-05    | 3.873296694  |
| KIAA1462      | -1.19170765   | 1.828568094 | -5.287916771 | 1.98E-07    | 3.55E-06    | 6.21370626   |
| NECAB1        | -1.191710016  | 0.46368709  | -10.12026689 | 1.03E-21    | 1.44E-19    | 38.46703352  |
| LIF           | -1.194344091  | 2.156052188 | -4.102669319 | 4.90E-05    | 0.000521194 | 0.939326487  |
| APCDD1        | -1.194695629  | 2.528756775 | -4.310063548 | 2.03E-05    | 0.000235588 | 1.77488481   |
| SLC22A3       | -1.195677882  | 0.926084963 | -5.596632076 | 3.92E-08    | 8.00E-07    | 7.780516352  |
| STC1          | -1.199691937  | 2.691918846 | -4.291881387 | 2.20E-05    | 0.000252999 | 1.700118915  |
| PLCD4         | -1.200060728  | 0.661931162 | -13.02116639 | 7.39E-33    | 3.54E-30    | 63.84281954  |
| EML1          | -1.201318469  | 1.149940885 | -7.155292503 | 3.68E-12    | 1.46E-10    | 16.81784455  |
| TEAD1         | -1.201936758  | 2.618695726 | -6.922402383 | 1.64E-11    | 5.94E-10    | 15.35351002  |
| NBEA          | -1.20289786   | 0.554511832 | -9.245891161 | 1.13E-18    | 1.08E-16    | 31.55290524  |
| TNFSF12       | -1.203884581  | 3.156487207 | -5.982816264 | 4.66E-09    | 1.13E-07    | 9.847768091  |
| SAMD4A        | -1.205127944  | 1.047624262 | -8.243518585 | 2.10E-15    | 1.34E-13    | 24.14773596  |
| MEF2C         | -1.206847114  | 1.10207629  | -8.501263135 | 3.20E-16    | 2.29E-14    | 25.99504509  |
| FBXO32        | -1.207043803  | 2.913884776 | -4.514845077 | 8.21E-06    | 0.00010476  | 2.636868993  |
| LRFN5         | -1.207397212  | 0.299731105 | -11.1679634  | 1.43E-25    | 3.02E-23    | 47.24120214  |
| NFASC         | -1.208787694  | 0.547121577 | -10.96778095 | 8.08E-25    | 1.58E-22    | 45.52680882  |
| TRIB1         | -1.209190316  | 4.561970596 | -5.509631607 | 6.24E-08    | 1.22E-06    | 7.331161443  |
| FXYD1         | -1.212484905  | 0.326992667 | -14.85582308 | 1.63E-40    | 1.53E-37    | 81.31175484  |
| VCL           | -1.214169581  | 4.136409024 | -6.696147827 | 6.78E-11    | 2.24E-09    | 13.96797719  |
| ANK2          | -1.215249472  | 0.374678039 | -11.57424677 | 4.02E-27    | 9.94E-25    | 50.77177603  |
| PPP1R3B       | -1.216964089  | 2.620076197 | -6.165784193 | 1.63E-09    | 4.28E-08    | 10.86786012  |
| PLA2G4A       | -1.217519081  | 2.321776768 | -4.884640442 | 1.47E-06    | 2.22E-05    | 4.28496734   |
| AKT3          | -1.219230594  | 1.575743178 | -5.808810689 | 1.23E-08    | 2.78E-07    | 8.901756341  |
| KIT           | -1.223008675  | 1.289317784 | -4.460739592 | 1.05E-05    | 0.000130028 | 2.405580305  |
| GPC6          | -1.2237272826 | 1.159348396 | -5.345132282 | 1.48E-07    | 2.71E-06    | 6.498243105  |
| SRGN          | -1.229441175  | 5.198109508 | -3.240398781 | 0.001287348 | 0.009207933 | -2.120976128 |
| AMOTL1        | -1.230476203  | 2.487667884 | -5.636660691 | 3.16E-08    | 6.57E-07    | 7.989302183  |
| NFATC4        | -1.237280568  | 1.890835064 | -6.50178815  | 2.23E-10    | 6.78E-09    | 12.80754663  |
| GLIPR2        | -1.238109138  | 2.562711283 | -4.563014186 | 6.61E-06    | 8.61E-05    | 2.844910918  |
| DMPK          | -1.238448836  | 3.217082137 | -7.236309205 | 2.17E-12    | 8.95E-11    | 17.33617061  |
| C20orf166-AS1 | -1.24386922   | 0.207965873 | -13.79975817 | 4.62E-36    | 2.93E-33    | 71.15140199  |
| ITGA9         | -1.24840907   | 1.053695391 | -8.214024095 | 2.59E-15    | 1.64E-13    | 23.93895385  |
| CSDC2         | -1.249832474  | 0.884830985 | -5.816169875 | 1.18E-08    | 2.67E-07    | 8.941285175  |
| LPPR4         | -1.250124877  | 0.461787126 | -10.37429121 | 1.25E-22    | 1.89E-20    | 40.54800879  |
| TMEM88        | -1.250197994  | 2.059640762 | -6.690975842 | 7.00E-11    | 2.31E-09    | 13.93673864  |
| AEBP1         | -1.252379744  | 4.885370874 | -2.704739139 | 0.00711011  | 0.038812888 | -3.677088164 |
| NPY6R         | -1.254504919  | 0.17818666  | -12.65665937 | 2.20E-31    | 9.11E-29    | 60.48287962  |
| SH3BGRL       | -1.255013453  | 5.080514633 | -5.611052744 | 3.63E-08    | 7.45E-07    | 7.855585614  |
| PLA2G5        | -1.256917408  | 0.637657862 | -7.601373199 | 1.89E-13    | 9.06E-12    | 19.72761023  |
| KCNK3         | -1.258385982  | 0.503352449 | -7.957478588 | 1.61E-14    | 9.07E-13    | 22.14603647  |
| PITX1         | -1.259338219  | 3.339753178 | -3.786368637 | 0.000174836 | 0.00162189  | -0.261443069 |
| RND3          | -1.261046302  | 4.208550386 | -5.039519386 | 6.91E-07    | 1.12E-05    | 5.009679665  |
| SGCG          | -1.261317289  | 0.213178257 | -13.94384408 | 1.16E-36    | 7.95E-34    | 72.52197919  |
| ROR2          | -1.262661434  | 1.380442542 | -5.202838259 | 3.06E-07    | 5.25E-06    | 5.795571926  |
| CCDC3         | -1.265259463  | 2.300602286 | -5.748264962 | 1.72E-08    | 3.77E-07    | 8.578165142  |
| STARD13       | -1.265985678  | 1.223287439 | -8.453224484 | 4.56E-16    | 3.17E-14    | 25.64766564  |
| PPM1L         | -1.266096203  | 1.432141136 | -7.428669384 | 6.06E-13    | 2.70E-11    | 18.58498503  |
| CREB3L1       | -1.266924534  | 2.613615078 | -4.039823607 | 6.35E-05    | 0.000656687 | 0.69363645   |
| IGFBP2        | -1.267464513  | 3.158641883 | -3.253253807 | 0.001231856 | 0.008867512 | -2.080340009 |

|               |              |             |              |             |             |              |
|---------------|--------------|-------------|--------------|-------------|-------------|--------------|
| TLN1          | -1.268294127 | 4.858001759 | -7.286608529 | 1.56E-12    | 6.56E-11    | 17.66026314  |
| PLSCR4        | -1.269739708 | 1.439979258 | -6.858322938 | 2.46E-11    | 8.70E-10    | 14.95735726  |
| MPZ           | -1.270598176 | 0.93214798  | -9.496232587 | 1.59E-19    | 1.70E-17    | 33.49149989  |
| CCL14         | -1.270921235 | 0.315288908 | -13.09578596 | 3.67E-33    | 1.80E-30    | 64.53571641  |
| ARID5B        | -1.271542009 | 2.968883844 | -6.946802696 | 1.41E-11    | 5.14E-10    | 15.5051297   |
| FOLR2         | -1.271723206 | 2.473640701 | -3.770810876 | 0.000185726 | 0.001712572 | -0.318189069 |
| ID2           | -1.274859142 | 4.043051151 | -4.417926561 | 1.27E-05    | 0.0001541   | 2.224363681  |
| SGCD          | -1.274943096 | 0.532340171 | -9.46015986  | 2.11E-19    | 2.21E-17    | 33.21007276  |
| SCARA3        | -1.277757616 | 2.836899932 | -3.993321588 | 7.67E-05    | 0.000779044 | 0.514101518  |
| GNAZ          | -1.278284603 | 0.771441789 | -7.381011583 | 8.32E-13    | 3.64E-11    | 18.2732269   |
| SELP          | -1.279476106 | 1.140131513 | -5.790186964 | 1.37E-08    | 3.05E-07    | 8.801912277  |
| SMIM10        | -1.28108647  | 1.873050582 | -6.398205247 | 4.15E-10    | 1.20E-08    | 12.20052748  |
| CPE           | -1.281636822 | 2.851154358 | -4.322078716 | 1.93E-05    | 0.000225012 | 1.824450602  |
| PPP1R1B       | -1.281982559 | 1.466566299 | -3.334959527 | 0.00092787  | 0.006960751 | -1.818485864 |
| CD55          | -1.284033522 | 4.355152509 | -4.964987626 | 9.96E-07    | 1.56E-05    | 4.658416281  |
| TBX20         | -1.285414841 | 0.317154854 | -10.61242586 | 1.68E-23    | 2.79E-21    | 42.52652789  |
| RGAG4         | -1.286212165 | 0.848280464 | -8.022118124 | 1.02E-14    | 5.97E-13    | 22.59384728  |
| FGF10         | -1.286444305 | 0.222222902 | -14.11470993 | 2.23E-37    | 1.59E-34    | 74.15406088  |
| PDE4D         | -1.287155541 | 1.163296785 | -10.02948041 | 2.16E-21    | 2.89E-19    | 37.73091812  |
| ACKR3         | -1.287803399 | 4.251037366 | -3.895023874 | 0.00011399  | 0.00110926  | 0.140946887  |
| ARID5A        | -1.291319338 | 2.975162426 | -6.842392936 | 2.72E-11    | 9.52E-10    | 14.85933172  |
| HAND1         | -1.291559916 | 0.282478379 | -8.957624893 | 1.05E-17    | 8.78E-16    | 29.36346639  |
| CTD-3252C9.4  | -1.293170946 | 3.519850244 | -5.114553435 | 4.77E-07    | 7.93E-06    | 5.367994738  |
| KCTD12        | -1.293314591 | 3.089735136 | -5.177441236 | 3.48E-07    | 5.91E-06    | 5.671909415  |
| C1orf95       | -1.293348531 | 0.318993147 | -9.797690969 | 1.42E-20    | 1.71E-18    | 35.87019458  |
| PDE4B         | -1.297076146 | 0.976353914 | -7.865600023 | 3.06E-14    | 1.65E-12    | 21.51413936  |
| CRY2          | -1.298856924 | 2.339338068 | -11.48132026 | 9.14E-27    | 2.20E-24    | 49.95837513  |
| PDE1A         | -1.299886869 | 0.557324059 | -10.97659085 | 7.49E-25    | 1.48E-22    | 45.60189744  |
| RP11-753H16.3 | -1.300743644 | 0.294743848 | -10.23559658 | 3.95E-22    | 5.73E-20    | 39.40796706  |
| TPSD1         | -1.301015331 | 0.549784124 | -7.87559703  | 2.85E-14    | 1.55E-12    | 21.5826296   |
| TGFB3         | -1.301067311 | 2.096454844 | -4.998741051 | 8.45E-07    | 1.34E-05    | 4.816917912  |
| TNFAIP3       | -1.302702573 | 3.288456013 | -4.430952437 | 1.19E-05    | 0.000146319 | 2.279330337  |
| FYCO1         | -1.303088455 | 2.625980931 | -8.201383788 | 2.84E-15    | 1.78E-13    | 23.84964317  |
| NTN1          | -1.303494813 | 1.000740698 | -5.996701427 | 4.30E-09    | 1.05E-07    | 9.924274709  |
| KANK1         | -1.30361304  | 2.408314058 | -6.616309869 | 1.11E-10    | 3.56E-09    | 13.4879394   |
| NCALD         | -1.306165288 | 1.011726333 | -8.508635414 | 3.03E-16    | 2.18E-14    | 26.04847935  |
| JAZF1         | -1.306506635 | 1.641343739 | -7.560595513 | 2.49E-13    | 1.17E-11    | 19.45601359  |
| LINC00675     | -1.306641895 | 1.621260336 | -3.578042377 | 0.000385991 | 0.00326007  | -1.003118883 |
| CPXM1         | -1.307537871 | 2.843655092 | -3.40649253  | 0.000720586 | 0.005603738 | -1.584176638 |
| ASP           | -1.308109663 | 0.318601719 | -15.07195507 | 1.94E-41    | 2.05E-38    | 83.4212601   |
| BVES          | -1.309816846 | 0.793974235 | -7.421029088 | 6.37E-13    | 2.83E-11    | 18.53490128  |
| LIFR          | -1.310185245 | 1.02008511  | -7.369466879 | 8.99E-13    | 3.91E-11    | 18.19793901  |
| RARRES2       | -1.310523597 | 4.162276861 | -3.359537964 | 0.00085109  | 0.00646534  | -1.738509742 |
| CDIP1         | -1.311113146 | 2.072269112 | -5.439665058 | 9.02E-08    | 1.72E-06    | 6.97421297   |
| CSPG4         | -1.312070633 | 2.217959395 | -4.790555796 | 2.30E-06    | 3.32E-05    | 3.854593866  |
| TSPYL2        | -1.316650145 | 2.634876484 | -8.098771946 | 5.91E-15    | 3.58E-13    | 23.12834119  |
| NDNF          | -1.318806195 | 0.496696668 | -8.88090289  | 1.88E-17    | 1.54E-15    | 28.78867635  |
| NES           | -1.321572405 | 2.81102464  | -5.033719335 | 7.11E-07    | 1.15E-05    | 4.982177686  |
| ACOX2         | -1.324360776 | 0.562181686 | -10.80506163 | 3.27E-24    | 5.93E-22    | 44.14600165  |
| CD69          | -1.324379783 | 1.331883678 | -5.260985613 | 2.28E-07    | 4.03E-06    | 6.080704173  |
| ARHGAP6       | -1.324936091 | 0.730973302 | -7.610742401 | 1.77E-13    | 8.58E-12    | 19.79016994  |
| RP11-6O2.3    | -1.327149398 | 0.307763501 | -13.20625868 | 1.30E-33    | 6.77E-31    | 65.56459087  |
| P2RY14        | -1.327834085 | 0.546509018 | -11.91393109 | 1.93E-28    | 5.61E-26    | 53.77356226  |
| ADH1C         | -1.330822893 | 1.315288047 | -3.3941911   | 0.000752843 | 0.005819708 | -1.624805873 |
| TGFBR2        | -1.331220395 | 3.994501569 | -6.177767484 | 1.52E-09    | 4.02E-08    | 10.93556755  |
| GNAO1         | -1.332395641 | 0.451777159 | -9.844787141 | 9.73E-21    | 1.20E-18    | 36.24606602  |
| DAPL1         | -1.33386199  | 1.012467828 | -3.904350768 | 0.00010983  | 0.001073781 | 0.175982028  |
| EMP3          | -1.337146065 | 3.641919535 | -4.011394479 | 7.13E-05    | 0.000729328 | 0.583648477  |
| AXL           | -1.338250983 | 2.783962903 | -4.306371907 | 2.06E-05    | 0.00023891  | 1.759681182  |
| RBP7          | -1.339462042 | 1.950104281 | -5.113002973 | 4.80E-07    | 7.99E-06    | 5.360543324  |
| ADARB1        | -1.34098351  | 1.66417087  | -6.845289906 | 2.67E-11    | 9.39E-10    | 14.87714471  |
| CLEC10A       | -1.341436733 | 1.020865689 | -6.424894299 | 3.54E-10    | 1.03E-08    | 12.35616534  |
| PHYHD1        | -1.341511373 | 1.321179168 | -5.690717964 | 2.36E-08    | 5.02E-07    | 8.273290398  |
| SRF           | -1.34310841  | 4.111002805 | -10.99625723 | 6.32E-25    | 1.27E-22    | 45.76963898  |
| RASSF3        | -1.343457213 | 3.25539703  | -7.329148446 | 1.17E-12    | 5.02E-11    | 17.93572045  |
| AFF3          | -1.344022772 | 0.261519174 | -13.46232334 | 1.15E-34    | 6.67E-32    | 67.96304416  |
| PDLIM4        | -1.344573372 | 2.415455673 | -4.365294071 | 1.60E-05    | 0.000189956 | 2.003769009  |
| RNF122        | -1.346267161 | 2.53572781  | -7.789417543 | 5.19E-14    | 2.70E-12    | 20.99434129  |
| RPS6KA2       | -1.34663867  | 1.965789121 | -7.865187385 | 3.07E-14    | 1.65E-12    | 21.51131374  |
| KLF6          | -1.347508617 | 4.957231172 | -6.543448583 | 1.73E-10    | 5.39E-09    | 13.05393667  |



|               |              |             |              |             |             |              |
|---------------|--------------|-------------|--------------|-------------|-------------|--------------|
| GFRA3         | -1.348241566 | 0.72753735  | -7.056152002 | 6.99E-12    | 2.66E-10    | 16.18980405  |
| RASGRP2       | -1.348600511 | 0.793109613 | -8.319712225 | 1.21E-15    | 7.89E-14    | 24.68958562  |
| ODC1          | -1.348740014 | 4.58538079  | -4.903240342 | 1.34E-06    | 2.04E-05    | 4.370935095  |
| DKK1          | -1.351296131 | 2.718749279 | -2.903652018 | 0.00388035  | 0.023519359 | -3.130664407 |
| SSPN          | -1.355386896 | 1.802321182 | -7.717141517 | 8.55E-14    | 4.28E-12    | 20.50470443  |
| SYT11         | -1.35557555  | 1.571547368 | -6.51084802  | 2.11E-10    | 6.47E-09    | 12.86101944  |
| MMP2          | -1.356111954 | 5.668428941 | -3.462422809 | 0.000589526 | 0.004710637 | -1.397696652 |
| THSD4         | -1.358274222 | 1.133907187 | -9.266923626 | 9.63E-19    | 9.26E-17    | 31.71446331  |
| DPYSL2        | -1.358813913 | 2.624318656 | -5.926642922 | 6.39E-09    | 1.51E-07    | 9.539785415  |
| VIM           | -1.360313697 | 5.940089285 | -4.173228714 | 3.64E-05    | 0.000399658 | 1.219343353  |
| DCHS1         | -1.360861863 | 1.284356959 | -7.57140126  | 2.31E-13    | 1.09E-11    | 19.52787616  |
| TMEM100       | -1.361076976 | 0.437220571 | -10.82762812 | 2.69E-24    | 4.93E-22    | 44.33680224  |
| PALM          | -1.362705336 | 1.594302003 | -5.215134709 | 2.87E-07    | 4.96E-06    | 5.855636765  |
| LYNX1         | -1.364490465 | 1.57897626  | -4.899224797 | 1.37E-06    | 2.08E-05    | 4.352350766  |
| MCAM          | -1.366032247 | 3.57188168  | -5.907702774 | 7.11E-09    | 1.67E-07    | 9.436496313  |
| TACC1         | -1.367750885 | 3.003933089 | -5.609644547 | 3.66E-08    | 7.49E-07    | 7.848247665  |
| EMCN          | -1.368001122 | 1.208369744 | -8.373198175 | 8.19E-16    | 5.47E-14    | 25.07208948  |
| ACTA2-AS1     | -1.368123815 | 0.558753086 | -9.686114319 | 3.50E-20    | 4.00E-18    | 34.98425678  |
| TSHZ3         | -1.371849221 | 1.246379624 | -7.145294426 | 3.93E-12    | 1.55E-10    | 16.75419602  |
| FOSL1         | -1.372651585 | 3.857487757 | -3.848128309 | 0.000137271 | 0.001307814 | -0.034026668 |
| NPR1          | -1.372947885 | 1.156142289 | -7.598359561 | 1.93E-13    | 9.23E-12    | 19.70750011  |
| HEPH          | -1.374644958 | 1.324023131 | -6.27559638  | 8.59E-10    | 2.35E-08    | 11.49240911  |
| C3orf70       | -1.374748305 | 0.911576056 | -8.048714594 | 8.44E-15    | 5.01E-13    | 22.77887719  |
| SYNPO         | -1.374771971 | 2.720434556 | -6.5747147   | 1.43E-10    | 4.51E-09    | 13.23969574  |
| WLS           | -1.375974814 | 3.770811622 | -5.031851637 | 7.18E-07    | 1.16E-05    | 4.97332764   |
| RP11-887P2.5  | -1.376431339 | 0.195034912 | -14.8909894  | 1.15E-40    | 1.12E-37    | 81.65434909  |
| PJA2          | -1.376910887 | 3.675545256 | -8.821472839 | 2.94E-17    | 2.37E-15    | 28.34576653  |
| ITPKB         | -1.377494431 | 2.634292415 | -9.747805592 | 2.13E-20    | 2.51E-18    | 35.47330206  |
| NFIL3         | -1.377575993 | 3.804957401 | -6.366292061 | 5.02E-10    | 1.42E-08    | 12.01512579  |
| TACC2         | -1.380920865 | 1.855568575 | -8.644097999 | 1.11E-16    | 8.47E-15    | 27.03611641  |
| EPHX2         | -1.38486487  | 1.554634045 | -6.743507949 | 5.06E-11    | 1.70E-09    | 14.25493632  |
| CPQ           | -1.385077448 | 2.775797892 | -5.971454714 | 4.97E-09    | 1.20E-07    | 9.785277833  |
| CXCL14        | -1.38764979  | 3.617042337 | -2.867603117 | 0.004341505 | 0.025800249 | -3.232461157 |
| PDGFD         | -1.388104884 | 1.384307991 | -7.255166937 | 1.91E-12    | 7.97E-11    | 17.45747142  |
| MEOX1         | -1.38903834  | 0.775564741 | -8.452318855 | 4.59E-16    | 3.19E-14    | 25.64113023  |
| CFH           | -1.389375725 | 2.896817883 | -4.657622297 | 4.28E-06    | 5.82E-05    | 3.25933811   |
| DNAJB4        | -1.389862755 | 2.292194255 | -8.298865979 | 1.40E-15    | 9.10E-14    | 24.54098102  |
| DENND2A       | -1.391911189 | 1.243698867 | -8.011612384 | 1.10E-14    | 6.36E-13    | 22.5208837   |
| LPAR1         | -1.392258954 | 2.086301331 | -7.023382593 | 8.63E-12    | 3.26E-10    | 15.98373479  |
| CYP27A1       | -1.39368514  | 2.292344072 | -5.031404774 | 7.20E-07    | 1.16E-05    | 4.97121062   |
| JUNB          | -1.39528268  | 7.503652273 | -6.434274333 | 3.35E-10    | 9.80E-09    | 12.41099178  |
| CAP2          | -1.395370679 | 1.599663012 | -6.809647532 | 3.35E-11    | 1.15E-09    | 14.65840603  |
| RRAD          | -1.397938629 | 2.353621566 | -3.425964733 | 0.000672149 | 0.005279801 | -1.51957934  |
| COL6A1        | -1.398482082 | 5.730598077 | -3.548831542 | 0.000430047 | 0.003583946 | -1.10396082  |
| CNRIP1        | -1.399419368 | 1.28946775  | -7.819713634 | 4.21E-14    | 2.22E-12    | 21.20060078  |
| MMRN1         | -1.399849666 | 0.518761455 | -9.932761388 | 4.76E-21    | 6.11E-19    | 36.9512013   |
| RSPO3         | -1.402158162 | 0.705769231 | -7.639588618 | 1.46E-13    | 7.12E-12    | 19.98314793  |
| FAM189A2      | -1.403360165 | 0.738351904 | -10.57775846 | 2.26E-23    | 3.70E-21    | 42.23686585  |
| GFRA1         | -1.404511742 | 0.347349477 | -12.47928528 | 1.13E-30    | 4.25E-28    | 58.86334761  |
| CD200         | -1.406250349 | 1.806719645 | -5.960552745 | 5.28E-09    | 1.27E-07    | 9.725409674  |
| RGS1          | -1.407656673 | 3.077354085 | -4.093014971 | 5.10E-05    | 0.00054055  | 0.901355732  |
| PRKCB         | -1.408407628 | 0.767603112 | -8.852289284 | 2.33E-17    | 1.89E-15    | 28.57517474  |
| PTX3          | -1.409276546 | 1.078207991 | -4.918679986 | 1.25E-06    | 1.91E-05    | 4.442517787  |
| RP11-554A11.4 | -1.409480635 | 0.555916347 | -11.10241186 | 2.52E-25    | 5.24E-23    | 46.6779328   |
| AHNAK         | -1.410131908 | 5.051467441 | -5.686682253 | 2.41E-08    | 5.13E-07    | 8.252008527  |
| PRKG1         | -1.410298965 | 0.740111864 | -10.09298573 | 1.28E-21    | 1.77E-19    | 38.2454055   |
| LMCD1         | -1.415213613 | 1.884054517 | -5.927397474 | 6.37E-09    | 1.51E-07    | 9.54390612   |
| SGCE          | -1.416040396 | 2.48430499  | -5.044679496 | 6.74E-07    | 1.09E-05    | 5.034170862  |
| ABLIM1        | -1.416158865 | 3.261687151 | -6.511611113 | 2.10E-10    | 6.44E-09    | 12.86552613  |
| ANGPTL2       | -1.416576752 | 3.248460224 | -4.615616734 | 5.20E-06    | 6.93E-05    | 3.074385088  |
| TMEM119       | -1.425608409 | 2.221342412 | -4.817969613 | 2.02E-06    | 2.95E-05    | 3.979219548  |
| DSTN          | -1.425685983 | 6.588615313 | -9.376048421 | 4.10E-19    | 4.11E-17    | 32.55657815  |
| FAIM2         | -1.426076535 | 0.310452767 | -13.68851944 | 1.34E-35    | 8.05E-33    | 70.09695572  |
| LUM           | -1.426248874 | 5.80827435  | -3.195137125 | 0.001501684 | 0.010489149 | -2.262833819 |
| PCDH7         | -1.429085303 | 1.393758794 | -5.501287114 | 6.52E-08    | 1.28E-06    | 7.288382558  |
| EBF1          | -1.430281015 | 0.808570245 | -10.30593286 | 2.20E-22    | 3.26E-20    | 39.98496964  |
| IL6ST         | -1.431496794 | 3.090867229 | -7.532364552 | 3.02E-13    | 1.40E-11    | 19.26863566  |
| AARD          | -1.433940158 | 0.310135336 | -10.50917234 | 4.02E-23    | 6.37E-21    | 41.66542426  |
| NCS1          | -1.439098128 | 3.173372141 | -6.821725298 | 3.10E-11    | 1.07E-09    | 14.73242521  |
| RBPMS         | -1.440934297 | 3.009149342 | -6.574214252 | 1.43E-10    | 4.52E-09    | 13.23671678  |

|              |              |             |              |             |             |              |
|--------------|--------------|-------------|--------------|-------------|-------------|--------------|
| LINC00865    | -1.441388612 | 1.19366683  | -8.611657707 | 1.42E-16    | 1.07E-14    | 26.79860092  |
| PRDM6        | -1.445903244 | 0.558391601 | -11.65193795 | 2.02E-27    | 5.14E-25    | 51.45442515  |
| LGI4         | -1.446063579 | 0.852770348 | -10.59952555 | 1.88E-23    | 3.10E-21    | 42.41867568  |
| C1R          | -1.446950926 | 5.069089697 | -4.061025989 | 5.82E-05    | 0.000607536 | 0.776133321  |
| TSC22D3      | -1.447352077 | 4.185880314 | -6.069189889 | 2.85E-09    | 7.19E-08    | 10.32610728  |
| MAFF         | -1.447869553 | 3.401231526 | -6.688183922 | 7.13E-11    | 2.34E-09    | 13.91988369  |
| ATP2B4       | -1.448829019 | 3.553785524 | -6.111038678 | 2.24E-09    | 5.75E-08    | 10.55993805  |
| PRICKLE2     | -1.450019509 | 1.185260483 | -9.810191885 | 1.29E-20    | 1.56E-18    | 35.9698531   |
| NXPH3        | -1.45282058  | 0.683306882 | -9.592866973 | 7.37E-20    | 8.17E-18    | 34.24881914  |
| MTURN        | -1.453530106 | 2.261604263 | -8.580204234 | 1.79E-16    | 1.33E-14    | 26.56890913  |
| OMD          | -1.457652954 | 0.479880346 | -9.424978416 | 2.79E-19    | 2.89E-17    | 32.93627076  |
| GRASP        | -1.458240347 | 1.800887529 | -7.859520009 | 3.19E-14    | 1.71E-12    | 21.47251642  |
| EDNRA        | -1.459531448 | 1.665581914 | -6.829776018 | 2.95E-11    | 1.02E-09    | 14.78182286  |
| MT1M         | -1.45984163  | 1.274388723 | -4.797541456 | 2.23E-06    | 3.22E-05    | 3.886290762  |
| INMT         | -1.460500516 | 1.030871468 | -8.707212036 | 6.94E-17    | 5.33E-15    | 27.50000067  |
| RAB9B        | -1.460765286 | 0.628366784 | -10.85291581 | 2.17E-24    | 4.06E-22    | 44.55087799  |
| RERGL        | -1.460942607 | 0.342214889 | -14.65889054 | 1.12E-39    | 9.63E-37    | 79.39795662  |
| RHOJ         | -1.461052355 | 1.496870242 | -8.431100105 | 5.36E-16    | 3.66E-14    | 25.48814935  |
| GSTM5        | -1.463166274 | 0.686008084 | -8.345325697 | 1.00E-15    | 6.62E-14    | 24.87254057  |
| MIR4697HG    | -1.46376571  | 0.400847413 | -11.26206826 | 6.28E-26    | 1.37E-23    | 48.05296867  |
| WWTR1        | -1.468198185 | 2.716973136 | -7.894357954 | 2.50E-14    | 1.37E-12    | 21.71133677  |
| ADAMTS4      | -1.469639386 | 1.687785808 | -5.92547142  | 6.44E-09    | 1.52E-07    | 9.533388564  |
| RANBP3L      | -1.471554368 | 0.303279434 | -12.30665317 | 5.50E-30    | 1.94E-27    | 57.29726486  |
| RP11-553L6.5 | -1.471803899 | 2.416192133 | -8.356010159 | 9.28E-16    | 6.14E-14    | 24.94897806  |
| FAM43A       | -1.474940168 | 2.000443869 | -6.982529828 | 1.12E-11    | 4.16E-10    | 15.72789729  |
| STON1        | -1.475442796 | 1.1024855   | -9.209155132 | 1.51E-18    | 1.40E-16    | 31.27130731  |
| ADAMTSL3     | -1.476453228 | 0.280879455 | -16.3586685  | 5.12E-47    | 1.11E-43    | 96.15145077  |
| HIF3A        | -1.477714473 | 0.42384126  | -9.710667233 | 2.87E-20    | 3.35E-18    | 35.17865892  |
| AC053503.12  | -1.480231254 | 0.262302899 | -11.45631582 | 1.14E-26    | 2.68E-24    | 49.74009305  |
| ISLR         | -1.480652147 | 3.696790897 | -3.151759926 | 0.001737622 | 0.011899427 | -2.397000389 |
| ACACB        | -1.481067711 | 0.855106554 | -11.85577428 | 3.26E-28    | 9.06E-26    | 53.256524    |
| WISP2        | -1.481726131 | 0.877956136 | -6.170394601 | 1.59E-09    | 4.18E-08    | 10.89389661  |
| PDZD4        | -1.486369918 | 0.635792143 | -9.2334579   | 1.25E-18    | 1.18E-16    | 31.45751538  |
| KLHL41       | -1.486503165 | 0.287490191 | -14.69881524 | 7.59E-40    | 6.71E-37    | 79.78528626  |
| CSGALNACT1   | -1.487885121 | 1.38189804  | -10.17084161 | 6.76E-22    | 9.65E-20    | 38.87885846  |
| BDKRB1       | -1.490628423 | 0.815194316 | -9.070235882 | 4.42E-18    | 3.80E-16    | 30.21321233  |
| SSC5D        | -1.492274552 | 1.252908987 | -6.478981801 | 2.56E-10    | 7.67E-09    | 12.67320978  |
| SGK1         | -1.495461082 | 2.957349579 | -4.991648663 | 8.75E-07    | 1.38E-05    | 4.783533766  |
| BOC          | -1.496135147 | 0.833421387 | -8.047716919 | 8.50E-15    | 5.04E-13    | 22.77192831  |
| SPEG         | -1.496231051 | 0.755938487 | -8.571317827 | 1.91E-16    | 1.41E-14    | 26.50412243  |
| SOBP         | -1.496614229 | 0.641381438 | -11.92238893 | 1.79E-28    | 5.23E-26    | 53.84886079  |
| TIPARP       | -1.49676903  | 3.074627078 | -7.373350853 | 8.76E-13    | 3.82E-11    | 18.22325788  |
| OLFM1        | -1.49903917  | 0.636995178 | -9.320899621 | 6.31E-19    | 6.23E-17    | 32.1301834   |
| TPPP3        | -1.502168526 | 2.265657462 | -5.455339128 | 8.31E-08    | 1.59E-06    | 7.053833156  |
| TUBB6        | -1.503417533 | 3.844450744 | -4.063070339 | 5.77E-05    | 0.000602975 | 0.78410885   |
| NDN          | -1.503689982 | 2.793453828 | -5.08116539  | 5.63E-07    | 9.23E-06    | 5.207975772  |
| CLIC4        | -1.505384154 | 4.538308506 | -5.042285129 | 6.82E-07    | 1.10E-05    | 5.022803826  |
| LHFP         | -1.505924909 | 3.133126385 | -6.152708981 | 1.76E-09    | 4.60E-08    | 10.79410845  |
| NFIA         | -1.513809192 | 1.880472378 | -8.674849832 | 8.84E-17    | 6.76E-15    | 27.26184629  |
| GAS7         | -1.514900608 | 1.284975857 | -7.283724672 | 1.59E-12    | 6.68E-11    | 17.64163446  |
| FGF2         | -1.515554206 | 0.639133855 | -10.1606489  | 7.35E-22    | 1.04E-19    | 38.7957598   |
| SLMAP        | -1.516950838 | 2.358438847 | -9.776283697 | 1.69E-20    | 2.01E-18    | 35.69971975  |
| PDGFRA       | -1.51829842  | 1.577570495 | -6.814844758 | 3.24E-11    | 1.11E-09    | 14.69024458  |
| RNF150       | -1.519331243 | 0.541755209 | -11.48157305 | 9.12E-27    | 2.20E-24    | 49.96058326  |
| RERG         | -1.520644803 | 0.930532734 | -9.129537125 | 2.80E-18    | 2.46E-16    | 30.66356849  |
| SLC9A9       | -1.521010968 | 1.354599141 | -8.752468734 | 4.94E-17    | 3.84E-15    | 27.83407992  |
| CCL19        | -1.522513852 | 2.123429891 | -3.26881383  | 0.001167656 | 0.008475413 | -2.030948394 |
| ARMCX1       | -1.522785763 | 2.033896589 | -6.099590505 | 2.39E-09    | 6.12E-08    | 10.4958373   |
| PER2         | -1.52435437  | 1.748303689 | -10.99157727 | 6.58E-25    | 1.31E-22    | 45.7297068   |
| FBXL22       | -1.524681941 | 0.698146476 | -10.66388096 | 1.09E-23    | 1.85E-21    | 42.95746926  |
| PRIMA1       | -1.524799602 | 0.447085046 | -12.3749481  | 2.94E-30    | 1.06E-27    | 57.9156047   |
| S1PR1        | -1.526806246 | 2.167774781 | -7.123728849 | 4.52E-12    | 1.77E-10    | 16.6171458   |
| KCNE4        | -1.527551245 | 1.15546318  | -7.304449664 | 1.38E-12    | 5.86E-11    | 17.77563777  |
| GREM2        | -1.527863147 | 0.422224212 | -11.98826244 | 9.90E-29    | 2.99E-26    | 54.43622469  |
| PELI2        | -1.528652284 | 1.050529363 | -9.400018086 | 3.39E-19    | 3.46E-17    | 32.74241917  |
| TIMP2        | -1.529670018 | 4.714768907 | -4.151284209 | 4.00E-05    | 0.000434326 | 1.131784299  |
| RAB23        | -1.53299554  | 1.537892951 | -8.015555062 | 1.07E-14    | 6.22E-13    | 22.5482578   |
| HBA2         | -1.533351284 | 2.327896923 | -4.624654263 | 4.99E-06    | 6.68E-05    | 3.114050039  |
| TUBA1A       | -1.534009914 | 4.725340749 | -4.725427846 | 3.13E-06    | 4.37E-05    | 3.561077609  |
| CLEC3A       | -1.534323587 | 0.268505485 | -9.864791627 | 8.27E-21    | 1.03E-18    | 36.40606256  |

|             |              |             |              |             |             |              |
|-------------|--------------|-------------|--------------|-------------|-------------|--------------|
| TSC22D1     | -1.535839192 | 4.302640605 | -8.176446283 | 3.39E-15    | 2.11E-13    | 23.67373892  |
| NNAT        | -1.536618983 | 1.565696729 | -3.583844338 | 0.00037776  | 0.003198419 | -0.982996656 |
| OLFML1      | -1.538115334 | 1.144240383 | -9.107300591 | 3.32E-18    | 2.89E-16    | 30.49446461  |
| AGTR1       | -1.53845666  | 0.433107948 | -11.09955471 | 2.59E-25    | 5.35E-23    | 46.65342316  |
| MYC         | -1.538500587 | 4.622503242 | -4.584638766 | 5.99E-06    | 7.88E-05    | 2.93895808   |
| C8orf88     | -1.540585646 | 1.00484394  | -6.84483194  | 2.68E-11    | 9.40E-10    | 14.87432835  |
| EVA1C       | -1.545166354 | 1.717512427 | -6.74333508  | 5.06E-11    | 1.70E-09    | 14.25388593  |
| ABCA8       | -1.549129205 | 0.400045074 | -13.76766288 | 6.28E-36    | 3.90E-33    | 70.84683321  |
| APBB1       | -1.549395913 | 1.562443582 | -7.318961202 | 1.26E-12    | 5.35E-11    | 17.86964209  |
| HAS1        | -1.550001918 | 0.573266788 | -7.597870481 | 1.93E-13    | 9.26E-12    | 19.70423703  |
| GNAL        | -1.552459393 | 0.77054295  | -11.45181078 | 1.19E-26    | 2.78E-24    | 49.70079182  |
| SELM        | -1.552668647 | 3.589351097 | -4.947043022 | 1.09E-06    | 1.69E-05    | 4.574539908  |
| NACC2       | -1.555068998 | 2.038245189 | -9.423517134 | 2.82E-19    | 2.91E-17    | 32.92491262  |
| EPHA7       | -1.556524889 | 0.575821198 | -9.818134004 | 1.21E-20    | 1.47E-18    | 36.03320996  |
| F3          | -1.557639613 | 3.590496594 | -3.557922519 | 0.000415855 | 0.003481574 | -1.072660307 |
| TWIST2      | -1.558427388 | 0.976697984 | -7.372343081 | 8.82E-13    | 3.84E-11    | 18.21668742  |
| FBLN1       | -1.562642664 | 6.002241507 | -3.709196715 | 0.000235461 | 0.002112457 | -0.540775173 |
| MXRA7       | -1.567294841 | 2.611393832 | -8.038838673 | 9.05E-15    | 5.34E-13    | 22.71011851  |
| SLIT2       | -1.567771605 | 0.676708914 | -10.39270893 | 1.07E-22    | 1.63E-20    | 40.70008637  |
| CYP1B1      | -1.569428073 | 1.563559238 | -4.96411148  | 1.00E-06    | 1.57E-05    | 4.654314738  |
| SLC2A3      | -1.570367048 | 2.560478184 | -5.253999465 | 2.36E-07    | 4.16E-06    | 6.046299716  |
| CRYM        | -1.571080809 | 0.728863227 | -8.062489025 | 7.65E-15    | 4.56E-13    | 22.8748818   |
| ADAMTS8     | -1.57337477  | 0.514010168 | -11.27159327 | 5.78E-26    | 1.27E-23    | 48.13533798  |
| FCER1A      | -1.576260388 | 0.929842086 | -7.901923714 | 2.37E-14    | 1.31E-12    | 21.7633052   |
| EDNRB       | -1.576332771 | 1.434129445 | -7.523914592 | 3.19E-13    | 1.47E-11    | 19.21265462  |
| HSPA2       | -1.576546375 | 1.973703887 | -6.906481669 | 1.82E-11    | 6.52E-10    | 15.25481035  |
| SELENBP1    | -1.58026853  | 3.008387236 | -4.541035442 | 7.30E-06    | 9.41E-05    | 2.749736485  |
| FAXDC2      | -1.583569319 | 0.877989286 | -12.13890743 | 2.53E-29    | 8.12E-27    | 55.78540468  |
| C2CD4B      | -1.587761451 | 0.916476509 | -7.932316149 | 1.92E-14    | 1.07E-12    | 21.97244001  |
| AKR1B10     | -1.589288772 | 2.543319077 | -2.645487052 | 0.008459427 | 0.044706787 | -3.832622245 |
| SLC25A23    | -1.594020011 | 2.859503638 | -7.212077134 | 2.54E-12    | 1.03E-10    | 17.18066138  |
| PDE5A       | -1.596610078 | 1.172286556 | -9.963287349 | 3.71E-21    | 4.82E-19    | 37.1967864   |
| CD248       | -1.596884066 | 3.606916612 | -5.135397347 | 4.29E-07    | 7.20E-06    | 5.468362905  |
| BMP5        | -1.60059174  | 0.546135195 | -9.628018259 | 5.56E-20    | 6.25E-18    | 34.52552114  |
| SH3BGR      | -1.600777819 | 1.685557842 | -9.451591987 | 2.26E-19    | 2.35E-17    | 33.14333149  |
| NR2F1       | -1.608578521 | 1.902874759 | -6.93923598  | 1.48E-11    | 5.37E-10    | 15.45806591  |
| EPHA3       | -1.60925307  | 0.855481077 | -9.964214382 | 3.69E-21    | 4.79E-19    | 37.2042518   |
| PLP1        | -1.610029755 | 0.223538499 | -19.86852216 | 1.25E-62    | 2.44E-58    | 131.7860579  |
| RBM24       | -1.610895926 | 0.396071612 | -13.17732264 | 1.71E-33    | 8.82E-31    | 65.29474954  |
| BAG2        | -1.612202129 | 1.533847474 | -8.323049602 | 1.18E-15    | 7.71E-14    | 24.71340135  |
| ALDH1B1     | -1.613372473 | 3.865094114 | -6.563292957 | 1.53E-10    | 4.81E-09    | 13.17175288  |
| AF131217.1  | -1.618415685 | 0.271219367 | -16.38861403 | 3.79E-47    | 8.50E-44    | 96.45075703  |
| FBXL7       | -1.618846993 | 1.120736037 | -9.921341728 | 5.23E-21    | 6.65E-19    | 36.85944908  |
| GLP2R       | -1.618948661 | 0.207627424 | -16.87178035 | 2.86E-49    | 7.94E-46    | 101.295906   |
| CYTL1       | -1.619196228 | 0.915241086 | -8.03894293  | 9.04E-15    | 5.34E-13    | 22.71084405  |
| CYGB        | -1.62082242  | 2.750806958 | -6.85103485  | 2.58E-11    | 9.08E-10    | 14.91248724  |
| MIR22HG     | -1.626091229 | 2.805375195 | -8.15200857  | 4.04E-15    | 2.50E-13    | 23.50173809  |
| SEPP1       | -1.626906744 | 2.186728956 | -5.462919388 | 7.98E-08    | 1.54E-06    | 7.09241029   |
| PTGFR       | -1.628687107 | 0.496516921 | -11.72978762 | 1.01E-27    | 2.64E-25    | 52.14081472  |
| SVEP1       | -1.630098244 | 0.735874969 | -13.35282488 | 3.26E-34    | 1.79E-31    | 66.93512609  |
| AREG        | -1.632998571 | 3.097662334 | -3.351770637 | 0.000874691 | 0.006614501 | -1.76384415  |
| C1S         | -1.634215104 | 4.643976595 | -3.935320038 | 9.70E-05    | 0.000961604 | 0.292872656  |
| ADAMTS9-AS1 | -1.634332876 | 0.214214356 | -17.78790956 | 2.52E-53    | 8.64E-50    | 110.5527397  |
| VSTM4       | -1.635279235 | 1.031016231 | -11.04085122 | 4.30E-25    | 8.72E-23    | 46.15061329  |
| GAS6        | -1.637115389 | 3.542345366 | -5.051924063 | 6.50E-07    | 1.06E-05    | 5.06859292   |
| GPIHBP1     | -1.637483983 | 0.646238923 | -11.37611263 | 2.31E-26    | 5.29E-24    | 49.04163502  |
| DUSP2       | -1.643578932 | 3.485791784 | -4.299743433 | 2.12E-05    | 0.000245276 | 1.732412475  |
| MIR568      | -1.644933755 | 1.730856159 | -8.084855504 | 6.53E-15    | 3.93E-13    | 23.03102741  |
| FIGF        | -1.645515924 | 0.478661133 | -12.63054151 | 2.80E-31    | 1.14E-28    | 60.24375703  |
| GPR183      | -1.648317519 | 2.198562897 | -5.852566396 | 9.68E-09    | 2.21E-07    | 9.137410363  |
| GNG11       | -1.650558607 | 2.586808258 | -7.755478808 | 6.57E-14    | 3.35E-12    | 20.76399499  |
| ITPR1       | -1.650656047 | 1.334821938 | -9.593087389 | 7.35E-20    | 8.17E-18    | 34.25055218  |
| GPR133      | -1.651124713 | 0.353985794 | -14.08550408 | 2.95E-37    | 2.08E-34    | 73.87458184  |
| SDC2        | -1.653843485 | 3.026748752 | -6.002483753 | 4.16E-09    | 1.02E-07    | 9.956179185  |
| NR3C2       | -1.655931689 | 0.640870592 | -11.64118105 | 2.22E-27    | 5.58E-25    | 51.35976717  |
| SERPINF1    | -1.661559442 | 4.311942621 | -4.455907853 | 1.07E-05    | 0.000132632 | 2.385049109  |
| COLEC12     | -1.667710173 | 1.163920877 | -7.010093595 | 9.39E-12    | 3.52E-10    | 15.90038366  |
| ID4         | -1.667919495 | 2.777286259 | -4.73944168  | 2.93E-06    | 4.12E-05    | 3.62392971   |
| TGFB1I1     | -1.670721933 | 2.573602537 | -6.951362304 | 1.37E-11    | 5.01E-10    | 15.53350944  |
| KCNH2       | -1.671690508 | 0.689777503 | -8.519516614 | 2.80E-16    | 2.03E-14    | 26.12740613  |

|               |              |             |               |             |             |              |
|---------------|--------------|-------------|---------------|-------------|-------------|--------------|
| PRKAR2B       | -1.673269465 | 1.507279114 | -7.578824782  | 2.20E-13    | 1.04E-11    | 19.57729085  |
| KCNMA1        | -1.675615838 | 0.541135908 | -12.04436121  | 5.96E-29    | 1.83E-26    | 54.93768616  |
| GPRASP1       | -1.677659033 | 0.852826785 | -12.3420885   | 3.97E-30    | 1.42E-27    | 57.61789443  |
| FNBP1         | -1.678461559 | 2.82171641  | -9.188975513  | 1.77E-18    | 1.62E-16    | 31.11693922  |
| DMD           | -1.679544696 | 0.61608569  | -11.06187234  | 3.59E-25    | 7.34E-23    | 46.33049572  |
| DTNA          | -1.683060979 | 0.580721308 | -11.1988107   | 1.09E-25    | 2.34E-23    | 47.50689044  |
| FZD7          | -1.685226222 | 2.62821969  | -7.732595239  | 7.69E-14    | 3.88E-12    | 20.6091079   |
| MYZAP         | -1.694252929 | 1.886172524 | -7.145061146  | 3.93E-12    | 1.55E-10    | 16.75271178  |
| MAP1A         | -1.696707563 | 1.046560316 | -8.899975783  | 1.62E-17    | 1.34E-15    | 28.93125188  |
| KCND3         | -1.700027721 | 0.716670711 | -10.97010847  | 7.92E-25    | 1.56E-22    | 45.54664349  |
| LAMA2         | -1.70078335  | 1.234985968 | -9.645313574  | 4.85E-20    | 5.47E-18    | 34.66190337  |
| PKIG          | -1.702795748 | 3.841445449 | -7.768856803  | 5.99E-14    | 3.08E-12    | 20.85470296  |
| CELF2         | -1.704081353 | 1.074522051 | -10.04858661  | 1.85E-21    | 2.49E-19    | 37.88549707  |
| ALDH1A1       | -1.706801146 | 2.509464403 | -3.964051647  | 8.64E-05    | 0.00086634  | 0.402084825  |
| CD34          | -1.713208265 | 2.266245453 | -9.454823564  | 2.20E-19    | 2.30E-17    | 33.16849993  |
| HBB           | -1.717345395 | 2.945370253 | -4.450654434  | 1.09E-05    | 0.000135338 | 2.362749082  |
| MIR221        | -1.717380841 | 0.756562513 | -9.56810689   | 8.97E-20    | 9.83E-18    | 34.05430443  |
| PLCB4         | -1.71769638  | 0.800586567 | -10.14626346  | 8.28E-22    | 1.17E-19    | 38.67856502  |
| HAAO          | -1.717762995 | 1.352565471 | -10.1724485   | 6.67E-22    | 9.54E-20    | 38.89196365  |
| PDE2A         | -1.720118323 | 0.921802861 | -12.10432589  | 3.46E-29    | 1.08E-26    | 55.47496738  |
| C16orf45      | -1.726921745 | 1.919048746 | -7.731088803  | 7.77E-14    | 3.91E-12    | 20.59892369  |
| MBNL1-AS1     | -1.728120035 | 0.654994286 | -12.23004999  | 1.11E-29    | 3.75E-27    | 56.60562732  |
| TMEM252       | -1.728763065 | 0.247933264 | -15.01354794  | 3.44E-41    | 3.59E-38    | 82.85027625  |
| CRTAC1        | -1.731161913 | 1.566514774 | -3.485071047  | 0.000543084 | 0.00438515  | -1.321367648 |
| CX3CL1        | -1.732454295 | 2.323918892 | -5.42641708   | 9.67E-08    | 1.83E-06    | 6.907072022  |
| NFIX          | -1.733658229 | 2.667446675 | -7.993162709  | 1.25E-14    | 7.15E-13    | 22.39291905  |
| BDKRB2        | -1.736515406 | 1.608348741 | -8.861267969  | 2.18E-17    | 1.77E-15    | 28.64211864  |
| TNS2          | -1.742268417 | 2.355378373 | -10.0135702   | 2.46E-21    | 3.26E-19    | 37.60233461  |
| ARHGFE25      | -1.743114146 | 2.157941625 | -7.519527288  | 3.29E-13    | 1.51E-11    | 19.18360764  |
| CHRM2         | -1.743524554 | 0.299779205 | -13.82617013  | 3.58E-36    | 2.32E-33    | 71.40223947  |
| SVIL          | -1.745110945 | 3.281171809 | -7.332090421  | 1.15E-12    | 4.93E-11    | 17.95481648  |
| WBSR17        | -1.745575488 | 0.531567147 | -11.17908047  | 1.30E-25    | 2.75E-23    | 47.33690783  |
| LPP           | -1.748495864 | 2.510201133 | -9.396499105  | 3.49E-19    | 3.54E-17    | 32.71511643  |
| TSPAN18       | -1.752680461 | 1.499515674 | -8.227160524  | 2.36E-15    | 1.50E-13    | 24.03187553  |
| ZEB1          | -1.754440876 | 1.44102647  | -9.197907554  | 1.65E-18    | 1.52E-16    | 31.18523884  |
| DUSP5         | -1.754973637 | 4.484008914 | -5.566954069  | 4.60E-08    | 9.28E-07    | 7.62654682   |
| F13A1         | -1.757569572 | 1.979011701 | -5.364251358  | 1.34E-07    | 2.47E-06    | 6.593920084  |
| CAV1          | -1.758511176 | 4.501115806 | -4.473541129  | 9.89E-06    | 0.000123597 | 2.460074946  |
| SOX17         | -1.764658111 | 0.980941272 | -11.196305791 | 1.24E-28    | 3.70E-26    | 54.2112987   |
| GATA5         | -1.765014634 | 0.447177296 | -10.91328124  | 1.29E-24    | 2.48E-22    | 45.06304427  |
| XPNPEP2       | -1.766802788 | 0.378513424 | -12.59075609  | 4.04E-31    | 1.62E-28    | 59.87992988  |
| JAM2          | -1.76758352  | 0.964060482 | -12.28534613  | 6.68E-30    | 2.33E-27    | 57.10468164  |
| LMO3          | -1.768248061 | 0.600464877 | -9.79124258   | 1.50E-20    | 1.80E-18    | 35.8188187   |
| AF001548.6    | -1.768884753 | 0.294093354 | -15.20957486  | 4.97E-42    | 5.80E-39    | 84.76922257  |
| DNAJB5        | -1.774746733 | 1.441042191 | -9.197995141  | 1.65E-18    | 1.52E-16    | 31.1859088   |
| CGNL1         | -1.77497991  | 0.837473567 | -11.82124422  | 4.44E-28    | 1.21E-25    | 52.95013643  |
| SELE          | -1.775002733 | 1.178582711 | -6.386134005  | 4.46E-10    | 1.28E-08    | 12.13030896  |
| GNG7          | -1.775292507 | 0.809112314 | -12.47762393  | 1.15E-30    | 4.29E-28    | 58.84822798  |
| C1QTNF7       | -1.775591542 | 0.436506918 | -18.123253    | 8.09E-55    | 4.11E-51    | 113.9594529  |
| TMEM35        | -1.785662386 | 0.723564949 | -8.286011462  | 1.54E-15    | 9.95E-14    | 24.44948006  |
| BCHE          | -1.786717383 | 0.608677102 | -9.233344472  | 1.25E-18    | 1.18E-16    | 31.45664553  |
| RCAN1         | -1.791612309 | 2.723540718 | -7.975086092  | 1.42E-14    | 8.06E-13    | 22.267753    |
| ANTXR2        | -1.794700101 | 2.269641579 | -7.899625389  | 2.41E-14    | 1.33E-12    | 21.74751433  |
| WFDC1         | -1.796410813 | 1.129619173 | -10.51324978  | 3.89E-23    | 6.18E-21    | 41.69933576  |
| ALDH2         | -1.799694162 | 2.31336167  | -6.397603962  | 4.17E-10    | 1.20E-08    | 12.19702721  |
| COL4A6        | -1.805802148 | 1.899890143 | -5.963265635  | 5.20E-09    | 1.26E-07    | 9.740298869  |
| RP11-498E.2.9 | -1.807502308 | 0.585732244 | -11.19391241  | 1.14E-25    | 2.43E-23    | 47.46467483  |
| CCL21         | -1.807994316 | 2.42634846  | -3.690114109  | 0.000253249 | 0.002254723 | -0.609015848 |
| TNFAIP8L3     | -1.810004959 | 1.210317791 | -8.79851328   | 3.50E-17    | 2.79E-15    | 28.17520617  |
| CMA1          | -1.811210171 | 0.50258157  | -9.257606074  | 1.04E-18    | 9.92E-17    | 31.64286176  |
| ANGPTL1       | -1.815484381 | 0.617725706 | -9.352124217  | 4.94E-19    | 4.93E-17    | 32.3714      |
| CCND2         | -1.82354804  | 2.330296066 | -6.357873244  | 5.28E-10    | 1.49E-08    | 11.96634364  |
| LAMC3         | -1.823908773 | 1.313417563 | -9.622655279  | 5.81E-20    | 6.51E-18    | 34.48326319  |
| TSPAN2        | -1.824276774 | 1.695402818 | -6.960342538  | 1.29E-11    | 4.75E-10    | 15.58944716  |
| RASL11A       | -1.826066374 | 1.96481955  | -7.642748491  | 1.42E-13    | 6.98E-12    | 20.00432076  |
| LRRN4CL       | -1.82757627  | 0.904841713 | -11.51650612  | 6.70E-27    | 1.62E-24    | 50.26596037  |
| EGR2          | -1.827998466 | 1.558376128 | -7.765049539  | 6.15E-14    | 3.16E-12    | 20.8288763   |
| MIR143        | -1.831139348 | 0.338727636 | -12.83346279  | 4.26E-32    | 1.87E-29    | 62.10739044  |
| SPRY1         | -1.834296486 | 2.927217963 | -8.602806994  | 1.51E-16    | 1.14E-14    | 26.73390811  |
| REEP1         | -1.835575692 | 0.578040647 | -10.31651816  | 2.02E-22    | 3.00E-20    | 40.07201102  |

|                |              |             |              |             |             |              |
|----------------|--------------|-------------|--------------|-------------|-------------|--------------|
| SHH            | -1.835887795 | 1.409627653 | -4.53619425  | 7.46E-06    | 9.59E-05    | 2.728828715  |
| BHMT2          | -1.839202077 | 0.455626707 | -15.38781797 | 8.49E-43    | 1.10E-39    | 86.52034406  |
| RP11-1100L3.8  | -1.840712875 | 0.788182549 | -11.9830189  | 1.04E-28    | 3.11E-26    | 54.389412    |
| MGLL           | -1.841880735 | 2.050631366 | -8.014670719 | 1.07E-14    | 6.24E-13    | 22.54211692  |
| PCP4L1         | -1.84303444  | 2.865127303 | -3.675763279 | 0.000267452 | 0.002362081 | -0.660117918 |
| BIN1           | -1.844772136 | 2.081028854 | -7.203346789 | 2.69E-12    | 1.09E-10    | 17.12473424  |
| RBFOX3         | -1.851243352 | 0.25555757  | -14.79202656 | 3.04E-40    | 2.78E-37    | 80.69088986  |
| GADD45B        | -1.852147708 | 4.215020403 | -6.721304372 | 5.80E-11    | 1.93E-09    | 14.12019965  |
| DIXDC1         | -1.853053403 | 1.107196331 | -11.26621645 | 6.06E-26    | 1.32E-23    | 48.08883632  |
| NEGR1          | -1.863492703 | 0.462376421 | -14.86775266 | 1.45E-40    | 1.38E-37    | 81.42794583  |
| PTRF           | -1.863856828 | 5.501758978 | -5.418642657 | 1.01E-07    | 1.90E-06    | 6.867737453  |
| MEDAG          | -1.86399296  | 1.574065193 | -6.61554386  | 1.11E-10    | 3.57E-09    | 13.48335629  |
| PRAC1          | -1.86851045  | 0.461578616 | -7.861476965 | 3.15E-14    | 1.69E-12    | 21.48591086  |
| TCEAL7         | -1.869418731 | 1.044187978 | -10.60027347 | 1.87E-23    | 3.08E-21    | 42.42492656  |
| COL6A2         | -1.871921087 | 6.037347581 | -4.448810106 | 1.10E-05    | 0.000136251 | 2.354925849  |
| IER3           | -1.873240335 | 5.496807283 | -6.049436021 | 3.19E-09    | 7.99E-08    | 10.21620106  |
| THBS1          | -1.877796517 | 4.587488573 | -5.320232466 | 1.68E-07    | 3.05E-06    | 6.374085331  |
| PGM5P4         | -1.879175864 | 0.25395465  | -17.98450789 | 3.36E-54    | 1.40E-50    | 112.5489509  |
| JUN            | -1.88014467  | 5.779068383 | -6.89031123  | 2.01E-11    | 7.18E-10    | 15.15474807  |
| ITGA5          | -1.883469239 | 3.868124552 | -5.901036245 | 7.38E-09    | 1.72E-07    | 9.400207426  |
| GPR124         | -1.886072383 | 2.097472971 | -7.833607942 | 3.82E-14    | 2.03E-12    | 21.29539512  |
| PHYHIP         | -1.887515397 | 0.806288799 | -10.44309069 | 7.01E-23    | 1.09E-20    | 41.11691073  |
| pk             | -1.8897221   | 2.046856301 | -9.34585549  | 5.19E-19    | 5.16E-17    | 32.32293018  |
| CXCL2          | -1.890102495 | 1.845845774 | -5.512563848 | 6.14E-08    | 1.21E-06    | 7.346207203  |
| PDZRN4         | -1.890225408 | 0.360403947 | -13.16372792 | 1.94E-33    | 9.76E-31    | 65.16805792  |
| MT1A           | -1.895385679 | 1.117256522 | -6.26967291  | 8.89E-10    | 2.43E-08    | 11.45848594  |
| HSD17B6        | -1.899065844 | 1.459646192 | -8.589276772 | 1.67E-16    | 1.25E-14    | 26.63510153  |
| MIR27A         | -1.901641499 | 0.624796444 | -10.04720789 | 1.87E-21    | 2.52E-19    | 37.87433643  |
| FGF7           | -1.905699898 | 1.022053814 | -8.198989821 | 2.89E-15    | 1.81E-13    | 23.83273971  |
| VIT            | -1.911949918 | 0.283486837 | -14.99858428 | 3.99E-41    | 4.09E-38    | 82.70410034  |
| TP53INP2       | -1.913683639 | 3.162632489 | -9.158086025 | 2.24E-18    | 2.01E-16    | 30.88108173  |
| C5orf66-AS1    | -1.919531115 | 0.600692018 | -11.91222798 | 1.96E-28    | 5.65E-26    | 53.75840299  |
| CBX7           | -1.919953426 | 1.984483496 | -11.57648169 | 3.94E-27    | 9.79E-25    | 50.79138063  |
| DDR2           | -1.925833864 | 1.348478324 | -8.894690627 | 1.69E-17    | 1.39E-15    | 28.89172278  |
| DPYSL3         | -1.927239928 | 3.480657176 | -5.236607756 | 2.58E-07    | 4.50E-06    | 5.960825653  |
| KIAA1644       | -1.927292844 | 0.535107916 | -12.41923505 | 1.96E-30    | 7.15E-28    | 58.31743216  |
| SLC25A25       | -1.929199254 | 2.264245158 | -11.22391903 | 8.76E-26    | 1.89E-23    | 47.72344217  |
| FILIP1         | -1.931800048 | 0.575426364 | -13.42023233 | 1.72E-34    | 9.84E-32    | 67.56751506  |
| SLC24A3        | -1.932668545 | 1.471414608 | -8.501119595 | 3.21E-16    | 2.29E-14    | 25.99400503  |
| TGFBR3         | -1.932881445 | 2.252171692 | -7.62667443  | 1.59E-13    | 7.75E-12    | 19.89668501  |
| PARM1          | -1.935945518 | 2.544089727 | -6.428998978 | 3.45E-10    | 1.01E-08    | 12.38014916  |
| RP11-867G23.10 | -1.945429601 | 0.393950846 | -17.41511992 | 1.13E-51    | 3.49E-48    | 106.7762519  |
| IGFBP6         | -1.955395858 | 3.852867662 | -4.832336215 | 1.89E-06    | 2.77E-05    | 4.044785891  |
| LYVE1          | -1.962193892 | 0.892023463 | -9.12241439  | 2.95E-18    | 2.59E-16    | 30.60937155  |
| CH25H          | -1.966841049 | 1.350170096 | -8.815501485 | 3.08E-17    | 2.47E-15    | 28.30137746  |
| CLCA4          | -1.967838707 | 2.183791973 | -3.64316581  | 0.000302545 | 0.002627889 | -0.775500304 |
| FERMT2         | -1.968396105 | 1.995063309 | -8.494481716 | 3.37E-16    | 2.37E-14    | 25.94592235  |
| TSPAN7         | -1.969066628 | 1.631277791 | -6.405441117 | 3.98E-10    | 1.15E-08    | 12.24267094  |
| AOX1           | -1.970916129 | 0.566274481 | -12.54979399 | 5.90E-31    | 2.27E-28    | 59.50588702  |
| HBEGF          | -1.971552407 | 3.198233024 | -6.927605519 | 1.59E-11    | 5.75E-10    | 15.38580586  |
| FGFR1          | -1.975894763 | 1.747387135 | -7.781341287 | 5.49E-14    | 2.85E-12    | 20.93945838  |
| DACT3          | -1.982891719 | 0.985876744 | -9.889343678 | 6.78E-21    | 8.51E-19    | 36.60270827  |
| MYOM1          | -1.986606098 | 0.536430646 | -14.39234998 | 1.51E-38    | 1.21E-35    | 76.82103413  |
| CLDN5          | -1.99083184  | 1.90090441  | -8.070607187 | 7.22E-15    | 4.32E-13    | 22.93151993  |
| APOLD1         | -1.991483729 | 2.026798949 | -9.847353261 | 9.53E-21    | 1.18E-18    | 36.26657855  |
| GATA6          | -1.994976245 | 1.185621318 | -10.53396948 | 3.26E-23    | 5.25E-21    | 41.87177713  |
| GYPC           | -1.99632916  | 1.982988873 | -7.728139987 | 7.93E-14    | 3.98E-12    | 20.57899263  |
| PPAP2B         | -2.000832892 | 3.18993857  | -10.01427813 | 2.45E-21    | 3.26E-19    | 37.60805329  |
| RP11-64B16.2   | -2.001158416 | 1.118636309 | -9.730642069 | 2.44E-20    | 2.87E-18    | 35.33704386  |
| CFL2           | -2.002779924 | 1.727311662 | -10.50972705 | 4.00E-23    | 6.35E-21    | 41.67003724  |
| HAND2          | -2.003634744 | 0.717658666 | -10.44023471 | 7.18E-23    | 1.11E-20    | 41.09325045  |
| RASD1          | -2.008117521 | 1.948210371 | -6.639474484 | 9.62E-11    | 3.12E-09    | 13.62673934  |
| RP11-166D19.1  | -2.014199086 | 0.92282187  | -11.02496797 | 4.93E-25    | 9.93E-23    | 46.01482207  |
| CPXM2          | -2.021947781 | 1.617596252 | -6.949530898 | 1.38E-11    | 5.06E-10    | 15.52210869  |
| PKDCC          | -2.025541484 | 1.20075647  | -7.241602483 | 2.09E-12    | 8.66E-11    | 17.37019435  |
| TCEAL2         | -2.032359992 | 0.561161979 | -10.67030221 | 1.03E-23    | 1.76E-21    | 43.01133213  |
| RHOB           | -2.036736291 | 6.411152885 | -9.119717616 | 3.02E-18    | 2.64E-16    | 30.58885918  |
| CRISPLD2       | -2.043640863 | 2.702193774 | -7.16841389  | 3.38E-12    | 1.35E-10    | 16.90148217  |
| JPH2           | -2.047990687 | 1.214440697 | -8.144511055 | 4.27E-15    | 2.62E-13    | 23.44904322  |
| ITGA7          | -2.051037022 | 1.719747574 | -8.172947967 | 3.48E-15    | 2.16E-13    | 23.64909362  |

|            |              |             |              |          |          |             |
|------------|--------------|-------------|--------------|----------|----------|-------------|
| PER1       | -2.064549508 | 2.780809073 | -9.414296208 | 3.03E-19 | 3.11E-17 | 32.85326748 |
| PLIN4      | -2.06623944  | 2.084709645 | -6.672541794 | 7.85E-11 | 2.57E-09 | 13.82555669 |
| GPX3       | -2.068451832 | 3.986582396 | -5.244243447 | 2.48E-07 | 4.35E-06 | 5.998321717 |
| KANK2      | -2.07809101  | 3.155976886 | -9.132459181 | 2.73E-18 | 2.41E-16 | 30.68581065 |
| SBSPON     | -2.079329911 | 1.232373232 | -8.4174153   | 5.93E-16 | 4.03E-14 | 25.38963125 |
| PMP22      | -2.083610819 | 3.794368938 | -6.34756862  | 5.61E-10 | 1.58E-08 | 11.90670689 |
| RGS5       | -2.086365158 | 2.608243799 | -8.008965985 | 1.12E-14 | 6.48E-13 | 22.50251525 |
| IL33       | -2.08748132  | 1.861686034 | -6.012157003 | 3.94E-09 | 9.72E-08 | 10.00961011 |
| EFEMP1     | -2.087527447 | 2.80310667  | -4.728686663 | 3.08E-06 | 4.31E-05 | 3.575678476 |
| JAM3       | -2.091017622 | 1.879579584 | -9.642229301 | 4.97E-20 | 5.59E-18 | 34.63757086 |
| MIR23A     | -2.093510928 | 1.054323467 | -9.317176547 | 6.50E-19 | 6.40E-17 | 32.10145732 |
| TACR2      | -2.10124133  | 0.68028022  | -10.70425745 | 7.72E-24 | 1.35E-21 | 43.29646625 |
| SORBS2     | -2.103438033 | 0.966311779 | -11.38556472 | 2.13E-26 | 4.91E-24 | 49.12381457 |
| CPED1      | -2.103582731 | 0.754923005 | -12.9482466  | 1.46E-32 | 6.72E-30 | 63.16734069 |
| MFAP5      | -2.112260432 | 1.378388721 | -6.459067797 | 2.88E-10 | 8.56E-09 | 12.55622624 |
| CYBRD1     | -2.112621485 | 3.024697777 | -7.161600421 | 3.53E-12 | 1.41E-10 | 16.85803714 |
| FBLN5      | -2.112989347 | 2.14064888  | -8.637138254 | 1.17E-16 | 8.89E-15 | 26.9851071  |
| PID1       | -2.115477006 | 0.921364957 | -12.45607138 | 1.40E-30 | 5.17E-28 | 58.65216609 |
| ASB5       | -2.118267814 | 0.368946026 | -12.58030449 | 4.45E-31 | 1.75E-28 | 59.78443905 |
| C3         | -2.124913842 | 4.242049897 | -4.637050083 | 4.71E-06 | 6.34E-05 | 3.168568284 |
| HLF        | -2.126780386 | 0.366242972 | -20.37633493 | 6.59E-65 | 1.92E-60 | 136.9884345 |
| ASB2       | -2.127044706 | 0.904152595 | -11.36608203 | 2.52E-26 | 5.71E-24 | 48.95446534 |
| TMOD1      | -2.127680446 | 0.778820708 | -11.90147081 | 2.16E-28 | 6.16E-26 | 53.66267908 |
| POPDC2     | -2.13395481  | 1.27187214  | -9.189843369 | 1.75E-18 | 1.61E-16 | 31.12357342 |
| ZCCHC24    | -2.13605866  | 2.127612103 | -9.268367101 | 9.52E-19 | 9.17E-17 | 31.7255601  |
| CADM3      | -2.139028829 | 0.522596112 | -11.07419206 | 3.22E-25 | 6.62E-23 | 46.43600588 |
| PDZRN3     | -2.140774777 | 1.252765435 | -9.691030502 | 3.36E-20 | 3.88E-18 | 35.02315648 |
| ANXA6      | -2.146872095 | 3.63810078  | -6.749726964 | 4.86E-11 | 1.64E-09 | 14.29273903 |
| ELN        | -2.164220606 | 2.23844533  | -6.448337107 | 3.07E-10 | 9.09E-09 | 12.49331201 |
| PYGM       | -2.166732518 | 0.470179857 | -15.795291   | 1.46E-44 | 2.30E-41 | 90.5444443  |
| CPA3       | -2.173386153 | 1.793262407 | -7.114753149 | 4.79E-12 | 1.87E-10 | 16.56020074 |
| CALD1      | -2.174035147 | 4.016863835 | -6.709419667 | 6.25E-11 | 2.07E-09 | 14.04822775 |
| CNTN1      | -2.178001288 | 0.993298888 | -8.247607999 | 2.03E-15 | 1.30E-13 | 24.17672636 |
| NCAM1      | -2.182370438 | 0.554442921 | -11.4584507  | 1.12E-26 | 2.66E-24 | 49.75872028 |
| RAI2       | -2.185204002 | 1.490344501 | -10.628204   | 1.47E-23 | 2.47E-21 | 42.6585433  |
| EMILIN1    | -2.192734723 | 3.772996198 | -5.700429049 | 2.24E-08 | 4.79E-07 | 8.324553788 |
| NEXN       | -2.196529536 | 1.645976431 | -9.2192718   | 1.40E-18 | 1.30E-16 | 31.34878167 |
| AC053503.6 | -2.202482729 | 0.609901017 | -9.739128258 | 2.28E-20 | 2.69E-18 | 35.40439522 |
| GSN        | -2.20461669  | 5.018035452 | -9.676038788 | 3.79E-20 | 4.31E-18 | 34.9045726  |
| AKAP12     | -2.20477142  | 2.151661677 | -7.919202174 | 2.10E-14 | 1.17E-12 | 21.88212777 |
| ABI3BP     | -2.207883224 | 0.877385515 | -12.11669904 | 3.10E-29 | 9.83E-27 | 55.58599152 |
| ADAM33     | -2.207952691 | 0.833717278 | -12.10142789 | 3.56E-29 | 1.10E-26 | 55.4489716  |
| C8orf4     | -2.21238281  | 4.765209601 | -5.371629733 | 1.29E-07 | 2.38E-06 | 6.630923185 |
| HPSE2      | -2.219153273 | 0.61649783  | -10.83056608 | 2.63E-24 | 4.82E-22 | 44.36165941 |
| SOCS3      | -2.224100566 | 5.181313989 | -7.085092614 | 5.80E-12 | 2.24E-10 | 16.37242555 |
| PRUNE2     | -2.225596635 | 0.706670001 | -10.41920081 | 8.56E-23 | 1.32E-20 | 40.91911356 |
| CSF3       | -2.22826826  | 1.007261988 | -6.629639104 | 1.02E-10 | 3.30E-09 | 13.56775867 |
| OLFML3     | -2.236093351 | 2.842404557 | -6.395525686 | 4.22E-10 | 1.21E-08 | 12.18493102 |
| CTSG       | -2.236896665 | 0.903235711 | -8.90087102  | 1.61E-17 | 1.33E-15 | 28.93794919 |
| PODN       | -2.237888906 | 2.222201131 | -7.0868485   | 5.73E-12 | 2.22E-10 | 16.38352453 |
| CLIP3      | -2.237926796 | 2.032015302 | -8.351125076 | 9.61E-16 | 6.36E-14 | 24.91402109 |
| BTG2       | -2.241995518 | 6.173827269 | -6.847574481 | 2.64E-11 | 9.27E-10 | 14.89119642 |
| ADCY5      | -2.24241971  | 0.794955369 | -11.65247071 | 2.01E-27 | 5.14E-25 | 51.45911445 |
| CCL2       | -2.244777044 | 3.008501953 | -6.433126921 | 3.37E-10 | 9.86E-09 | 12.40428161 |
| TPPP       | -2.244921566 | 0.807196272 | -13.89830566 | 1.79E-36 | 1.19E-33 | 72.08823448 |
| MAP1B      | -2.249607643 | 1.591578006 | -9.069491363 | 4.44E-18 | 3.82E-16 | 30.20757073 |
| MAMDC2     | -2.254486405 | 0.891900858 | -10.81512924 | 3.00E-24 | 5.47E-22 | 44.23109586 |
| KLF9       | -2.258392868 | 2.421385235 | -9.709234037 | 2.90E-20 | 3.38E-18 | 35.16730273 |
| FILIP1L    | -2.260408763 | 2.440151189 | -8.543721196 | 2.34E-16 | 1.71E-14 | 26.30322966 |
| MYOC       | -2.273261799 | 0.243971329 | -17.23407667 | 7.18E-51 | 2.10E-47 | 104.9468013 |
| PAMR1      | -2.277227756 | 1.532415072 | -11.77980686 | 6.44E-28 | 1.72E-25 | 52.58305357 |
| SMTN       | -2.279897934 | 3.158266696 | -10.83421705 | 2.55E-24 | 4.72E-22 | 44.39255438 |
| F10        | -2.289459945 | 0.638571335 | -17.84910695 | 1.34E-53 | 4.91E-50 | 111.1738038 |
| CCDC69     | -2.289602446 | 2.791935273 | -9.921307208 | 5.23E-21 | 6.65E-19 | 36.85917182 |
| EMP1       | -2.291059708 | 3.809265871 | -7.57157911  | 2.31E-13 | 1.09E-11 | 19.52905958 |
| MRVI1      | -2.310857091 | 1.680477915 | -9.780543178 | 1.64E-20 | 1.95E-18 | 35.733621   |
| FAM46B     | -2.313887645 | 1.662248083 | -7.834986534 | 3.78E-14 | 2.01E-12 | 21.30480746 |
| KLF4       | -2.318664707 | 3.369327736 | -8.643547283 | 1.12E-16 | 8.49E-15 | 27.03207906 |
| CXCL12     | -2.322239472 | 2.004652621 | -7.515388134 | 3.38E-13 | 1.55E-11 | 19.15621545 |
| PTGS2      | -2.324009766 | 2.99189498  | -5.992872283 | 4.40E-09 | 1.07E-07 | 9.903161356 |

|              |              |             |              |          |             |             |
|--------------|--------------|-------------|--------------|----------|-------------|-------------|
| TPSB2        | -2.325203293 | 2.126995425 | -7.263348537 | 1.81E-12 | 7.60E-11    | 17.51017536 |
| AP000892.6   | -2.327660258 | 0.999016837 | -10.66604505 | 1.07E-23 | 1.82E-21    | 42.97562001 |
| SOD3         | -2.331226439 | 3.313680406 | -6.32390419  | 6.46E-10 | 1.80E-08    | 11.77005456 |
| COX7A1       | -2.331806638 | 2.407611715 | -9.477038358 | 1.85E-19 | 1.96E-17    | 33.34166645 |
| LTBP4        | -2.353800523 | 3.186145628 | -10.09341656 | 1.28E-21 | 1.77E-19    | 38.24890267 |
| PALLD        | -2.35669046  | 3.551663209 | -8.13267585  | 4.64E-15 | 2.84E-13    | 23.36593367 |
| RASL12       | -2.362982448 | 1.763676177 | -9.952417059 | 4.06E-21 | 5.24E-19    | 37.10927998 |
| APOD         | -2.365286552 | 2.952427835 | -4.875755076 | 1.53E-06 | 2.31E-05    | 4.244002668 |
| ITGA8        | -2.384120245 | 0.969941129 | -14.68843428 | 8.40E-40 | 7.32E-37    | 79.68454258 |
| FAM129A      | -2.393744627 | 2.430824834 | -8.401757129 | 6.65E-16 | 4.49E-14    | 25.27704675 |
| PSD          | -2.39787515  | 1.11697337  | -10.89807016 | 1.47E-24 | 2.81E-22    | 44.93383652 |
| TPSAB1       | -2.404470802 | 2.094988444 | -7.64879201  | 1.37E-13 | 6.72E-12    | 20.04483401 |
| PPP1R14A     | -2.405146855 | 2.392908005 | -8.730665427 | 5.82E-17 | 4.52E-15    | 27.67298048 |
| TPM1         | -2.411259432 | 3.745766519 | -8.549395443 | 2.25E-16 | 1.65E-14    | 26.34449867 |
| CSRP1        | -2.414268026 | 4.493773938 | -10.68927938 | 8.77E-24 | 1.52E-21    | 43.17062596 |
| AQP1         | -2.415445977 | 4.283776457 | -9.419228918 | 2.92E-19 | 3.00E-17    | 32.89158816 |
| CACNA1H      | -2.415599528 | 1.381734734 | -10.35410461 | 1.48E-22 | 2.22E-20    | 40.38150947 |
| FLNA         | -2.424352481 | 6.125495403 | -6.983599052 | 1.11E-11 | 4.14E-10    | 15.73457815 |
| CKB          | -2.425380208 | 4.315421645 | -6.649186164 | 9.06E-11 | 2.94E-09    | 13.68504781 |
| MYOCD        | -2.42674777  | 0.518216338 | -15.40714088 | 7.01E-43 | 9.51E-40    | 86.7105255  |
| RP11-394O4.5 | -2.430570157 | 1.541642578 | -8.727119955 | 5.98E-17 | 4.62E-15    | 27.6468102  |
| CSRNP1       | -2.432388194 | 3.590373814 | -11.63874385 | 2.27E-27 | 5.68E-25    | 51.33832666 |
| LIMS2        | -2.433827837 | 1.620670498 | -10.86127246 | 2.02E-24 | 3.79E-22    | 44.62168407 |
| TCF21        | -2.442742989 | 0.757952224 | -16.68960113 | 1.81E-48 | 4.40E-45    | 99.46563888 |
| IGFBP5       | -2.454991598 | 4.443617462 | -5.545883858 | 5.14E-08 | 1.03E-06    | 7.517663736 |
| ITM2A        | -2.457701984 | 2.026734754 | -9.235767248 | 1.23E-18 | 1.16E-16    | 31.4752266  |
| MATN2        | -2.459221527 | 2.34644755  | -8.226784084 | 2.36E-15 | 1.50E-13    | 24.02921125 |
| KCNMB1       | -2.479345363 | 1.037194575 | -11.15600335 | 1.58E-25 | 3.34E-23    | 47.1382973  |
| PLA2G2A      | -2.480358798 | 3.458506688 | -4.21773581  | 3.02E-05 | 0.000336612 | 1.398232396 |
| NR4A2        | -2.483721982 | 2.152095713 | -10.68183726 | 9.34E-24 | 1.60E-21    | 43.10813761 |
| SLC2A4       | -2.48721707  | 0.548813195 | -14.61754399 | 1.68E-39 | 1.42E-36    | 78.99719351 |
| SGCA         | -2.492966791 | 0.945895554 | -10.62031081 | 1.57E-23 | 2.63E-21    | 42.59248693 |
| MGP          | -2.498432536 | 4.833066588 | -5.545730364 | 5.15E-08 | 1.03E-06    | 7.516871843 |
| A2M          | -2.50050512  | 5.634064895 | -7.906970443 | 2.29E-14 | 1.27E-12    | 21.79799123 |
| MSRB3        | -2.504763509 | 1.975053136 | -8.790740377 | 3.71E-17 | 2.95E-15    | 28.1175329  |
| CILP         | -2.50753217  | 1.155780939 | -7.471625341 | 4.54E-13 | 2.06E-11    | 18.86730741 |
| RAMP1        | -2.507662666 | 2.767365354 | -6.339349689 | 5.89E-10 | 1.65E-08    | 11.85919812 |
| FBLN2        | -2.520218987 | 3.107063289 | -6.845763526 | 2.67E-11 | 9.37E-10    | 14.88005749 |
| MYADM        | -2.542202891 | 4.0891404   | -7.618814785 | 1.68E-13 | 8.17E-12    | 19.8441175  |
| CLU          | -2.552931254 | 4.963201057 | -5.552568884 | 4.96E-08 | 9.96E-07    | 7.552170841 |
| CCDC80       | -2.554769649 | 2.186422579 | -7.459563724 | 4.92E-13 | 2.22E-11    | 18.78790782 |
| RBPMS2       | -2.555771355 | 1.795331301 | -9.097459212 | 3.58E-18 | 3.12E-16    | 30.41971157 |
| SPON1        | -2.560582828 | 2.129831422 | -7.77830553  | 5.61E-14 | 2.90E-12    | 20.91883966 |
| SLIT3        | -2.570855772 | 1.521416457 | -11.43944638 | 1.32E-26 | 3.08E-24    | 49.5929687  |
| FXYD6        | -2.573978789 | 1.443874368 | -9.454392703 | 2.21E-19 | 2.30E-17    | 33.16514393 |
| CHRD1        | -2.595038705 | 0.801631432 | -10.52962182 | 3.39E-23 | 5.43E-21    | 41.83557691 |
| TNXB         | -2.595091798 | 0.641530935 | -15.68462004 | 4.42E-44 | 6.46E-41    | 89.44872378 |
| ITIH5        | -2.602672469 | 1.134670191 | -13.47587981 | 1.01E-34 | 5.92E-32    | 68.09053953 |
| RCAN2        | -2.605735268 | 1.78202142  | -11.93673589 | 1.57E-28 | 4.62E-26    | 53.97664972 |
| PDLIM3       | -2.611715612 | 1.858852232 | -8.434854911 | 5.22E-16 | 3.57E-14    | 25.51520045 |
| HSPB7        | -2.615813984 | 1.223820653 | -8.59685501  | 1.58E-16 | 1.18E-14    | 26.69042935 |
| TPM2         | -2.629239209 | 5.169832558 | -7.012477305 | 9.25E-12 | 3.48E-10    | 15.91532555 |
| SFRP1        | -2.64356928  | 1.320898291 | -8.3857584   | 7.47E-16 | 5.01E-14    | 25.16216822 |
| PCOLCE2      | -2.648051128 | 0.927695085 | -11.901383   | 2.16E-28 | 6.16E-26    | 53.6618979  |
| ZFP36        | -2.677550711 | 6.73371758  | -9.290116382 | 8.03E-19 | 7.86E-17    | 31.89289713 |
| PPP1R12B     | -2.677800954 | 1.722033845 | -12.08524441 | 4.12E-29 | 1.27E-26    | 55.30385733 |
| PTGDS        | -2.720481208 | 2.922598799 | -6.558751873 | 1.58E-10 | 4.95E-09    | 13.14476675 |
| FENDRR       | -2.732875915 | 0.945842099 | -13.77000697 | 6.14E-36 | 3.85E-33    | 70.86906838 |
| PLAC9        | -2.752440435 | 1.736754747 | -11.79817776 | 5.46E-28 | 1.48E-25    | 52.74571644 |
| COL14A1      | -2.753622993 | 1.975859525 | -10.11908252 | 1.04E-21 | 1.45E-19    | 38.45740432 |
| KLF2         | -2.754207794 | 2.820128864 | -11.10878252 | 2.39E-25 | 4.98E-23    | 46.73259483 |
| FOXF1        | -2.766225141 | 1.867072811 | -11.64116653 | 2.22E-27 | 5.58E-25    | 51.35963945 |
| MAOB         | -2.768026078 | 1.518097937 | -9.186620168 | 1.80E-18 | 1.65E-16    | 31.09893625 |
| FABP4        | -2.773657811 | 3.1464568   | -4.363210275 | 1.61E-05 | 0.000191418 | 1.995085047 |
| MRGPRF       | -2.848647245 | 2.026741366 | -9.813151304 | 1.26E-20 | 1.53E-18    | 35.99345757 |
| EGR3         | -2.84929627  | 1.276036919 | -12.90818605 | 2.13E-32 | 9.62E-30    | 62.7969431  |
| SRPX         | -2.858002457 | 2.393900629 | -8.374578677 | 8.10E-16 | 5.42E-14    | 25.08198537 |
| CTC-296K1.4  | -2.85868433  | 0.624394719 | -13.53986901 | 5.52E-35 | 3.26E-32    | 68.69302951 |
| IL6          | -2.871593657 | 1.638363641 | -8.185180449 | 3.19E-15 | 1.99E-13    | 23.73530373 |
| P2RX1        | -2.873275217 | 0.878163007 | -11.75822578 | 7.81E-28 | 2.07E-25    | 52.39213023 |

|             |              |             |              |          |             |             |
|-------------|--------------|-------------|--------------|----------|-------------|-------------|
| FGL2        | -2.887808286 | 2.031529348 | -10.0547673  | 1.76E-21 | 2.37E-19    | 37.93554069 |
| ATF3        | -2.894557157 | 3.780238685 | -8.143566347 | 4.29E-15 | 2.64E-13    | 23.44240602 |
| GEM         | -2.915539759 | 2.332012556 | -9.499417788 | 1.55E-19 | 1.66E-17    | 33.51638313 |
| CTGF        | -2.917300851 | 5.166828498 | -7.116875104 | 4.72E-12 | 1.85E-10    | 16.57365809 |
| FAM107A     | -2.923388315 | 0.842090541 | -16.55212296 | 7.27E-48 | 1.70E-44    | 98.08712957 |
| RGS2        | -2.934023291 | 3.893252327 | -8.859022674 | 2.21E-17 | 1.80E-15    | 28.62537364 |
| ATP1A2      | -2.948957504 | 0.490418964 | -15.85234352 | 8.28E-45 | 1.38E-41    | 91.11007535 |
| C2orf40     | -2.95479639  | 0.592208643 | -15.18374125 | 6.41E-42 | 7.07E-39    | 84.51591219 |
| SMOC2       | -2.977765257 | 2.32771378  | -8.834951565 | 2.66E-17 | 2.15E-15    | 28.44603905 |
| CRYAB       | -2.986935936 | 2.352595283 | -9.137473825 | 2.63E-18 | 2.33E-16    | 30.72399232 |
| SFRP2       | -2.987239783 | 4.003975361 | -4.522238882 | 7.94E-06 | 0.000101638 | 2.668672594 |
| PTGIS       | -3.003823143 | 1.902770778 | -7.851628913 | 3.37E-14 | 1.80E-12    | 21.41853083 |
| DCN         | -3.014210966 | 3.596078987 | -7.404238809 | 7.13E-13 | 3.15E-11    | 18.42497691 |
| PLN         | -3.032370874 | 1.534306601 | -8.773227186 | 4.23E-17 | 3.32E-15    | 27.98771795 |
| NR4A3       | -3.037451325 | 1.177736914 | -13.39172716 | 2.25E-34 | 1.26E-31    | 67.29993451 |
| AOC3        | -3.054537863 | 2.487500005 | -9.965843173 | 3.64E-21 | 4.75E-19    | 37.21736952 |
| CES1        | -3.087902868 | 1.85688785  | -6.476881783 | 2.59E-10 | 7.75E-09    | 12.66085943 |
| CYR61       | -3.095690468 | 5.452860661 | -8.496179145 | 3.33E-16 | 2.35E-14    | 25.95821546 |
| MYLK        | -3.101843696 | 2.011639077 | -10.27791035 | 2.78E-22 | 4.09E-20    | 39.7548032  |
| C11orf96    | -3.107650828 | 3.258411448 | -9.543219971 | 1.09E-19 | 1.19E-17    | 33.85911969 |
| PRELP       | -3.126842992 | 1.729082657 | -10.11194751 | 1.10E-21 | 1.53E-19    | 38.39940943 |
| SORBS1      | -3.132217448 | 1.673065863 | -10.31029437 | 2.13E-22 | 3.15E-20    | 40.0208272  |
| C16orf89    | -3.154573303 | 0.610827585 | -18.88240451 | 3.30E-58 | 2.75E-54    | 121.6980467 |
| LINC01082   | -3.154961731 | 0.961690009 | -16.10564927 | 6.53E-46 | 1.23E-42    | 93.62749083 |
| CTC-296K1.3 | -3.156672087 | 0.828948607 | -13.24450363 | 9.06E-34 | 4.81E-31    | 65.92161811 |
| SPARCL1     | -3.166352822 | 4.59030219  | -10.01365491 | 2.46E-21 | 3.26E-19    | 37.60301891 |
| ACKR1       | -3.181804678 | 2.116679663 | -8.362581768 | 8.84E-16 | 5.87E-14    | 24.99602668 |
| CASQ2       | -3.183685164 | 0.952342615 | -10.7174048  | 6.90E-24 | 1.21E-21    | 43.40700866 |
| FOS         | -3.19269383  | 6.292509469 | -8.70881408  | 6.86E-17 | 5.28E-15    | 27.5118062  |
| HSPB8       | -3.20908326  | 3.554488346 | -7.696830359 | 9.83E-14 | 4.90E-12    | 20.36772406 |
| TNS1        | -3.213376529 | 2.499909974 | -10.49114048 | 4.68E-23 | 7.33E-21    | 41.51554854 |
| DUSP1       | -3.268846791 | 6.138565839 | -9.510780942 | 1.41E-19 | 1.53E-17    | 33.60519777 |
| ADAMTS1     | -3.29019114  | 2.857215813 | -11.38382204 | 2.16E-26 | 4.96E-24    | 49.10866045 |
| OGN         | -3.293781556 | 0.725694673 | -14.43356726 | 1.01E-38 | 8.32E-36    | 77.21848878 |
| EGR1        | -3.300361329 | 5.468037348 | -9.46073562  | 2.10E-19 | 2.20E-17    | 33.21455917 |
| TAGLN       | -3.31423293  | 5.485185691 | -7.474309488 | 4.46E-13 | 2.02E-11    | 18.88499008 |
| ACTA2       | -3.371749446 | 5.763277469 | -8.167903767 | 3.61E-15 | 2.23E-13    | 23.61357123 |
| PTGS1       | -3.382094655 | 2.153486999 | -9.459796293 | 2.12E-19 | 2.21E-17    | 33.20723988 |
| SDPR        | -3.402933008 | 1.779577523 | -12.87385731 | 2.93E-32 | 1.31E-29    | 62.47993781 |
| PGM5-AS1    | -3.435193171 | 0.591722861 | -15.07378704 | 1.90E-41 | 2.05E-38    | 83.43918007 |
| MYL9        | -3.466115942 | 5.889213881 | -8.45562395  | 4.48E-16 | 3.12E-14    | 25.6649836  |
| PDK4        | -3.570661116 | 2.179026689 | -11.46029904 | 1.10E-26 | 2.62E-24    | 49.77484876 |
| DPT         | -3.695470812 | 1.759580477 | -9.616869486 | 6.08E-20 | 6.80E-18    | 34.43769056 |
| SCARA5      | -3.760991268 | 0.695064267 | -19.74874173 | 4.32E-62 | 5.05E-58    | 130.5593832 |
| MFAP4       | -3.805716065 | 3.920850358 | -8.801109857 | 3.43E-17 | 2.74E-15    | 28.19448005 |
| C7          | -3.830862834 | 1.245566547 | -11.35474542 | 2.79E-26 | 6.28E-24    | 48.85599519 |
| ADH1B       | -3.847621583 | 0.800349637 | -15.89182969 | 5.58E-45 | 9.57E-42    | 91.50185106 |
| PGM5        | -3.870763221 | 1.251287901 | -13.07600667 | 4.42E-33 | 2.13E-30    | 64.35188798 |
| FHL1        | -3.876247111 | 2.191294431 | -11.04379352 | 4.19E-25 | 8.53E-23    | 46.17577982 |
| FLNC        | -3.882433477 | 1.856569966 | -10.50061112 | 4.32E-23 | 6.79E-21    | 41.59424702 |
| NR4A1       | -3.889159436 | 3.082770523 | -12.01809383 | 7.56E-29 | 2.30E-26    | 54.7027417  |
| PCP4        | -3.907196759 | 1.682131771 | -8.436984458 | 5.14E-16 | 3.52E-14    | 25.53054636 |
| CLEC3B      | -3.958376422 | 1.616404298 | -17.64774207 | 1.05E-52 | 3.42E-49    | 109.1313881 |
| SYNPO2      | -4.017361495 | 1.66752581  | -12.10452987 | 3.46E-29 | 1.08E-26    | 55.47679719 |
| FOSB        | -4.074912047 | 3.506525709 | -9.590432298 | 7.51E-20 | 8.29E-18    | 34.22967806 |
| ACTC1       | -4.163797761 | 1.402960214 | -9.592717199 | 7.38E-20 | 8.17E-18    | 34.24764155 |
| LMOD1       | -4.207963664 | 2.481478635 | -10.52668129 | 3.47E-23 | 5.54E-21    | 41.81109796 |
| CFD         | -4.229717944 | 3.567121323 | -12.19622125 | 1.50E-29 | 5.02E-27    | 56.30084792 |
| SYNM        | -4.322808213 | 1.882727156 | -11.8815279  | 2.59E-28 | 7.33E-26    | 53.48532873 |
| ACTG2       | -4.868656851 | 4.050553015 | -8.926073803 | 1.33E-17 | 1.11E-15    | 29.12668135 |
| CNN1        | -5.043359839 | 3.350814329 | -9.729907201 | 2.46E-20 | 2.88E-18    | 35.33121327 |
| HSPB6       | -5.070281528 | 2.275511792 | -12.15467874 | 2.19E-29 | 7.16E-27    | 55.92712513 |
| PI16        | -5.29308973  | 0.860198074 | -18.63743732 | 4.11E-57 | 2.66E-53    | 119.1974943 |
| MYH11       | -5.548364503 | 2.946500346 | -10.62226017 | 1.55E-23 | 2.59E-21    | 42.60879811 |
| DES         | -6.058681878 | 4.138784333 | -7.997416175 | 1.21E-14 | 6.97E-13    | 22.42240127 |



# Supplementary Table S4

| Gene    |
|---------|
| HLF     |
| TCF21   |
| AFF3    |
| NR4A3   |
| EGR3    |
| ZBTB16  |
| NR4A1   |
| SOX17   |
| PRDM6   |
| NR3C2   |
| FOXF1   |
| CSRNP1  |
| KLF2    |
| SRF     |
| GATA5   |
| NR4A2   |
| TBX20   |
| HMGB3   |
| GATA6   |
| HAND2   |
| EBF1    |
| MYBL2   |
| HIF3A   |
| KLF9    |
| FOSB    |
| MEF2D   |
| EGR1    |
| ZFPM2   |
| TBX5    |
| ZEB1    |
| HAND1   |
| CENPA   |
| FOS     |
| NFIA    |
| KLF4    |
| MEIS1   |
| FOXM1   |
| MEF2C   |
| MEOX1   |
| ZEB2    |
| TSC22D1 |
| ATF3    |
| NFIX    |
| TCF3    |
| FOXN3   |
| EGR2    |
| JAZF1   |
| MITF    |
| TUB     |
| TWIST2  |
| THRA    |
| E2F1    |
| HMGA1   |
| MEIS2   |
| TSHZ3   |
| ARID5B  |
| NR2F1   |

TEAD1  
JUN  
ARID5A  
TBX4  
SOX4  
MAFF  
NFIC  
ETV4  
KLF6  
NFATC4  
JUNB  
NFIL3  
HOXB7  
TSC22D3  
JUND  
NFIB  
NR2F6  
ZNF692  
CSDC2  
PITX2  
PARP12  
IRF5  
PBX1  
E2F8  
MSX1  
JDP2  
CDIP1  
TCF19  
NFE2L3  
ZFP36L1  
GRHL2  
HMGB2  
ETS2  
SREBF1  
ID4  
MYC  
AR  
ID2  
TFAP2C  
SOX7  
ATOH8  
ETV7  
CREB3L1  
TFAP2A  
FOSL1  
PITX1  
ZNF488  
IRF7  
OSR1  
HOXB5  
HES4  
HOXB6  
IRF6  
GATA3  
TBX1  
SP6  
MYCL  
HES2

SOX9

# Supplementary Table S5

| gene  | KM.Pvalue  | HR         | HR.95L     | HR.95H     | coxPvalue  |
|-------|------------|------------|------------|------------|------------|
| NFIA  | 0.00052983 | 1.24774802 | 1.02089044 | 1.52501684 | 0.03062543 |
| EGR2  | 0.00086847 | 1.21606925 | 1.04430364 | 1.41608664 | 0.01180433 |
| CSDC2 | 0.03341661 | 1.18841672 | 1.0209911  | 1.38329736 | 0.02587385 |
| MYC   | 0.00441424 | 1.12852106 | 1.00907799 | 1.26210243 | 0.03415038 |
| ID2   | 0.02582234 | 0.83564424 | 0.73559758 | 0.94929797 | 0.00578548 |
| ETV7  | 8.67E-06   | 0.77394341 | 0.67182928 | 0.89157828 | 0.00038577 |
| PITX1 | 0.02408171 | 1.11473651 | 1.00405353 | 1.23762075 | 0.04177204 |
| HOXB5 | 0.00551152 | 0.77656823 | 0.67208786 | 0.89729075 | 0.00060361 |
| HES4  | 0.00903485 | 0.85755488 | 0.76319043 | 0.963587   | 0.009778   |
| HOXB6 | 0.01578521 | 0.82041648 | 0.71185153 | 0.94553876 | 0.00627175 |
| GATA3 | 0.02396519 | 0.90683608 | 0.84233547 | 0.97627573 | 0.00938324 |
| TBX1  | 0.00317948 | 0.85084648 | 0.77329905 | 0.93617047 | 0.00092402 |
| SP6   | 0.01643687 | 0.85184172 | 0.76325411 | 0.95071132 | 0.00420811 |

## Supplementary Table S6

| id               | HR          | HR.95L      | HR.95H      | pvalue      |
|------------------|-------------|-------------|-------------|-------------|
| age              | 1.034145192 | 1.017462595 | 1.051101322 | 5.20E-05    |
| gender           | 0.836555185 | 0.597360941 | 1.171527179 | 0.298976559 |
| pathologic_stage | 1.786622656 | 1.451989749 | 2.198376757 | 4.15E-08    |
| pathologic_t     | 1.716259328 | 1.368824022 | 2.151880763 | 2.86E-06    |
| pathologic_m     | 1.186406933 | 1.015673049 | 1.385841057 | 0.031073257 |
| pathologic_n     | 1.218743707 | 1.093316548 | 1.358560085 | 0.000356955 |
| ETV7             | 0.963250309 | 0.939008344 | 0.988118118 | 0.003988259 |

# Supplementary Table S7

| id               | HR          | HR.95L      | HR.95H      | pvalue      |
|------------------|-------------|-------------|-------------|-------------|
| age              | 1.032082299 | 1.01508778  | 1.049361338 | 0.000193219 |
| pathologic_stage | 1.25938642  | 0.961731613 | 1.649165041 | 0.093671518 |
| pathologic_t     | 1.479192444 | 1.114648582 | 1.962959736 | 0.006692214 |
| pathologic_m     | 1.188906879 | 1.013452975 | 1.394736215 | 0.033670267 |
| pathologic_n     | 1.206125359 | 1.051946254 | 1.382901812 | 0.007238297 |
| ETV7             | 0.971290655 | 0.947953524 | 0.995202309 | 0.0188979   |

# Supplementary Table S8

|              | logFC       | AveExpr     | t           | P.Value  | adj.P.Val | B           |
|--------------|-------------|-------------|-------------|----------|-----------|-------------|
| ETV7         | 1.749772046 | 2.678614052 | 27.47174172 | 1.08E-94 | 6.33E-90  | 205.4113409 |
| PSMB8        | 1.328317517 | 5.539403664 | 15.45528694 | 1.02E-42 | 2.98E-38  | 85.93208743 |
| RTP4         | 1.413862703 | 2.869373662 | 13.79428799 | 8.90E-36 | 1.73E-31  | 70.00463227 |
| IFI35        | 1.217763071 | 4.420968973 | 12.95099938 | 2.34E-32 | 1.95E-28  | 62.16394835 |
| PSMB9        | 1.739924186 | 3.79682187  | 12.80668413 | 8.82E-32 | 6.44E-28  | 60.84216007 |
| TAP1         | 1.533151009 | 4.912530527 | 12.65924075 | 3.40E-31 | 2.12E-27  | 59.49823619 |
| IRF1         | 1.148894666 | 3.405502923 | 12.65214517 | 3.63E-31 | 2.12E-27  | 59.43373043 |
| HLA-F        | 1.588142799 | 3.922234477 | 12.59805735 | 5.95E-31 | 2.89E-27  | 58.94253687 |
| APOL3        | 1.125780966 | 2.417882433 | 12.56966817 | 7.70E-31 | 3.40E-27  | 58.68509161 |
| BATF2        | 1.344060432 | 1.780182756 | 12.52093254 | 1.20E-30 | 4.67E-27  | 58.2437327  |
| HLA-A        | 1.439018508 | 8.518930621 | 12.4719486  | 1.87E-30 | 6.84E-27  | 57.80089091 |
| B2M          | 1.197326367 | 9.025079023 | 12.25756425 | 1.30E-29 | 3.73E-26  | 55.87195077 |
| UBE2L6       | 1.254700538 | 5.336784083 | 12.25431695 | 1.34E-29 | 3.73E-26  | 55.84285019 |
| HLA-B        | 1.474209435 | 8.884945599 | 12.14978609 | 3.43E-29 | 9.11E-26  | 54.90800563 |
| TAP2         | 1.033733952 | 3.082742232 | 12.12124543 | 4.43E-29 | 1.13E-25  | 54.6534077  |
| HCP5         | 1.46071386  | 3.252270451 | 11.68196488 | 2.20E-27 | 4.94E-24  | 50.77108515 |
| HLA-C        | 1.074021251 | 8.70003431  | 11.38781058 | 2.89E-26 | 6.02E-23  | 48.21122539 |
| GBP4         | 1.27990766  | 2.990958746 | 10.9740628  | 1.02E-24 | 1.86E-21  | 44.66834974 |
| UBD          | 1.727614985 | 1.921418352 | 10.95451307 | 1.21E-24 | 2.13E-21  | 44.5026855  |
| OASL         | 1.257458407 | 2.473418608 | 10.88340804 | 2.21E-24 | 3.69E-21  | 43.90150051 |
| CXCL11       | 1.781598109 | 2.002305496 | 10.51153661 | 5.06E-23 | 7.38E-20  | 40.79295113 |
| HLA-H        | 1.149872835 | 4.889010592 | 10.39754352 | 1.30E-22 | 1.77E-19  | 39.85237305 |
| IFIT3        | 1.477729382 | 3.627456749 | 10.31187753 | 2.65E-22 | 3.52E-19  | 39.14944172 |
| IFI44        | 1.456355946 | 3.963265916 | 10.17510372 | 8.15E-22 | 1.06E-18  | 38.03422709 |
| OR2I1P       | 1.509587989 | 1.707161933 | 10.12844278 | 1.19E-21 | 1.52E-18  | 37.65578589 |
| SAMD9L       | 1.043165366 | 1.994661364 | 10.09800073 | 1.53E-21 | 1.82E-18  | 37.40944668 |
| TRIM22       | 1.12368215  | 2.807012781 | 10.04904668 | 2.28E-21 | 2.61E-18  | 37.01423923 |
| GBP1         | 1.334970622 | 3.67563619  | 10.00565444 | 3.24E-21 | 3.64E-18  | 36.66489924 |
| HLA-DMA      | 1.16910447  | 4.376872537 | 9.969427539 | 4.35E-21 | 4.62E-18  | 36.37394571 |
| AC092580.4   | 1.098182697 | 1.464995921 | 9.943053836 | 5.38E-21 | 5.61E-18  | 36.16253026 |
| IFI44L       | 1.182740946 | 1.86886036  | 9.924513054 | 6.25E-21 | 6.40E-18  | 36.01410862 |
| LAMP3        | 1.023491842 | 2.326823955 | 9.616428342 | 7.33E-20 | 7.14E-17  | 33.57291299 |
| IDO1         | 1.674346886 | 2.087584825 | 9.60644812  | 7.94E-20 | 7.60E-17  | 33.49463525 |
| CD74         | 1.481370247 | 8.201741802 | 9.566887306 | 1.08E-19 | 1.01E-16  | 33.18485274 |
| AIM2         | 1.609943787 | 2.470992566 | 9.547220544 | 1.27E-19 | 1.16E-16  | 33.03115204 |
| OAS2         | 1.209762624 | 3.711025018 | 9.516749758 | 1.61E-19 | 1.45E-16  | 32.79341116 |
| CTA-384D8.35 | 1.103221747 | 1.555808551 | 9.349897772 | 5.94E-19 | 4.93E-16  | 31.5002076  |
| GNLY         | 1.161436122 | 1.493568173 | 9.294977883 | 9.10E-19 | 7.09E-16  | 31.07777016 |
| CASP1        | 1.019589515 | 2.57671255  | 9.191343775 | 2.03E-18 | 1.52E-15  | 30.28504305 |
| CXCL10       | 1.973039439 | 3.775945644 | 9.158861703 | 2.60E-18 | 1.92E-15  | 30.03777626 |
| WARS         | 1.229298574 | 4.697364037 | 9.080555139 | 4.74E-18 | 3.37E-15  | 29.44404753 |
| STAT1        | 1.052289791 | 5.188311788 | 8.893779484 | 1.96E-17 | 1.27E-14  | 28.04161294 |
| TNFSF10      | 1.284594455 | 4.834056743 | 8.874044096 | 2.27E-17 | 1.46E-14  | 27.89456985 |
| GZMH         | 1.061456453 | 1.46788775  | 8.81550147  | 3.52E-17 | 2.19E-14  | 27.45968444 |
| GBP5         | 1.226012661 | 1.484701858 | 8.801819466 | 3.90E-17 | 2.40E-14  | 27.35832875 |
| NKG7         | 1.266884935 | 2.470888951 | 8.694908747 | 8.66E-17 | 4.86E-14  | 26.57003833 |
| APOL1        | 1.270029814 | 6.443354069 | 8.639980641 | 1.30E-16 | 7.16E-14  | 26.16760371 |
| GZMA         | 1.30104792  | 2.277712452 | 8.630190997 | 1.40E-16 | 7.63E-14  | 26.09606364 |
| BST2         | 1.460348275 | 6.73855428  | 8.548859981 | 2.55E-16 | 1.33E-13  | 25.50388929 |
| HLA-DQB1     | 1.310570832 | 3.692461587 | 8.272410724 | 1.90E-15 | 8.92E-13  | 23.52046001 |
| CD2          | 1.048203307 | 2.178992456 | 8.245539442 | 2.30E-15 | 1.06E-12  | 23.330129   |
| GZMB         | 1.251268005 | 2.118614492 | 8.219696575 | 2.76E-15 | 1.26E-12  | 23.14749913 |
| MX1          | 1.066745478 | 3.719905379 | 8.160927813 | 4.20E-15 | 1.86E-12  | 22.73371211 |
| ISG15        | 1.120802833 | 6.961370064 | 8.085046412 | 7.20E-15 | 3.07E-12  | 22.2025957  |
| HLA-DRB1     | 1.412337854 | 7.128450159 | 8.014447702 | 1.18E-14 | 4.84E-12  | 21.7116779  |
| HLA-DRB5     | 1.455113537 | 5.327326045 | 7.990639594 | 1.40E-14 | 5.60E-12  | 21.54683019 |
| CD3D         | 1.022961728 | 2.298591372 | 7.978491926 | 1.52E-14 | 6.05E-12  | 21.46285716 |

|              |              |             |              |           |             |              |
|--------------|--------------|-------------|--------------|-----------|-------------|--------------|
| CXCL9        | 1.55708421   | 2.83400403  | 7.687197179  | 1.14E-13  | 3.97E-11    | 19.4774235   |
| IFI27        | 1.513116988  | 5.241914651 | 7.663941355  | 1.34E-13  | 4.57E-11    | 19.32127651  |
| HLA-DPA1     | 1.254814991  | 4.151252323 | 7.659463818  | 1.38E-13  | 4.68E-11    | 19.29125349  |
| RARRES3      | 1.370987427  | 4.395298565 | 7.627133746  | 1.72E-13  | 5.76E-11    | 19.07486178  |
| HLA-DRA      | 1.371065061  | 7.654804898 | 7.590606495  | 2.20E-13  | 7.30E-11    | 18.83120338  |
| CCL5         | 1.383657018  | 3.970407058 | 7.571692946  | 2.50E-13  | 8.20E-11    | 18.70538421  |
| IL2RG        | 1.051234579  | 2.723889904 | 7.366124617  | 9.87E-13  | 2.94E-10    | 17.35322093  |
| IFI16        | 1.004169365  | 4.228530367 | 7.193162099  | 3.07E-12  | 8.37E-10    | 16.23761025  |
| IFITM1       | 1.164264569  | 5.715766023 | 7.143303437  | 4.24E-12  | 1.11E-09    | 15.91982479  |
| HLA-DPB1     | 1.147900051  | 5.15818674  | 7.14152805   | 4.29E-12  | 1.12E-09    | 15.90854059  |
| HLA-DQA1     | 1.112652935  | 2.916819658 | 7.105546981  | 5.41E-12  | 1.39E-09    | 15.68031828  |
| KLHDC7B      | 1.595714174  | 3.447126636 | 7.0588815    | 7.30E-12  | 1.82E-09    | 15.38566499  |
| TYMP         | 1.113816999  | 4.824572005 | 7.046305369  | 7.91E-12  | 1.95E-09    | 15.30651671  |
| SECTM1       | 1.043089404  | 2.719903416 | 6.986173414  | 1.16E-11  | 2.81E-09    | 14.92960284  |
| IFI6         | 1.24597877   | 7.340307772 | 6.700014781  | 6.97E-11  | 1.52E-08    | 13.17099     |
| PDZK1IP1     | 1.419947702  | 2.982252561 | 6.6390924    | 1.01E-10  | 2.17E-08    | 12.8041685   |
| HLA-DRB6     | 1.019086564  | 3.416528309 | 6.272737133  | 9.09E-10  | 1.66E-07    | 10.65572211  |
| LAMB3        | 1.166010585  | 5.286262677 | 6.238523526  | 1.11E-09  | 2.00E-07    | 10.46018082  |
| SAA1         | 1.41600332   | 2.654930863 | 6.048062623  | 3.33E-09  | 5.38E-07    | 9.387850504  |
| CTA-384D8.31 | 1.496002497  | 3.706587592 | 5.926902493  | 6.59E-09  | 9.89E-07    | 8.72014756   |
| KRT20        | -1.651014337 | 3.849272968 | -5.111245432 | 4.94E-07  | 4.44E-05    | 4.527055269  |
| PTN          | -1.187229059 | 3.467783696 | -4.940954515 | 1.14E-06  | 9.03E-05    | 3.719953799  |
| COL17A1      | 1.052893569  | 2.930380651 | 4.84201851   | 1.83E-06  | 0.000132701 | 3.262179777  |
| SLPI         | 1.253477216  | 6.10662035  | 4.642403218  | 4.65E-06  | 0.000289119 | 2.363762761  |
| S100A2       | 1.340524778  | 6.890815914 | 4.557765834  | 6.85E-06  | 0.000394335 | 1.993093726  |
| TAC3         | -1.020517525 | 1.387124891 | -4.452689084 | 1.10E-05  | 0.000575002 | 1.541488142  |
| CASP14       | 1.074722252  | 2.298160438 | 4.32014166   | 1.96E-05  | 0.000906287 | 0.985465445  |
| KRT17        | 1.034247792  | 8.441684512 | 4.032005215  | 6.60E-05  | 0.002344174 | -0.170126098 |
| IGF2         | -1.315859273 | 4.783349661 | -3.964475176 | 8.69E-05  | 0.002884411 | -0.430331139 |
| UPK2         | -1.110485535 | 5.791721532 | -3.239613774 | 0.0012953 | 0.021795005 | -2.963902709 |



## Supplementary Table S9

## BP

| ONTOLOCID | Description                                             | GeneRatio | BgRatio   | pvalue   | p.adjust | qvalue   | geneID         | Count |
|-----------|---------------------------------------------------------|-----------|-----------|----------|----------|----------|----------------|-------|
| BP        | GO:0034341 response to interferon                       | 26/77     | 199/18670 | 1.42E-32 | 2.16E-29 | 1.62E-29 | IRF1/HLA-F     | 26    |
| BP        | GO:0071346 cellular response to interferon              | 23/77     | 180/18670 | 1.58E-28 | 1.20E-25 | 9.03E-26 | IRF1/HLA-F     | 23    |
| BP        | GO:0060333 interferon-gamma production                  | 19/77     | 91/18670  | 6.44E-28 | 3.26E-25 | 2.45E-25 | IRF1/HLA-F     | 19    |
| BP        | GO:0060337 type I interferon signaling                  | 18/77     | 95/18670  | 1.23E-25 | 3.72E-23 | 2.80E-23 | PSMB8/IFI3     | 18    |
| BP        | GO:0071357 cellular response to interferon              | 18/77     | 95/18670  | 1.23E-25 | 3.72E-23 | 2.80E-23 | PSMB8/IFI3     | 18    |
| BP        | GO:0034340 response to type I interferon                | 18/77     | 99/18670  | 2.74E-25 | 6.93E-23 | 5.21E-23 | PSMB8/IFI3     | 18    |
| BP        | GO:0002478 antigen processing and presentation          | 19/77     | 175/18670 | 3.42E-22 | 7.42E-20 | 5.58E-20 | PSMB8/PSM      | 19    |
| BP        | GO:0019884 antigen processing and presentation          | 19/77     | 182/18670 | 7.35E-22 | 1.40E-19 | 1.05E-19 | PSMB8/PSM      | 19    |
| BP        | GO:0048002 antigen processing and presentation          | 19/77     | 189/18670 | 1.53E-21 | 2.58E-19 | 1.94E-19 | PSMB8/PSM      | 19    |
| BP        | GO:0019882 antigen processing and presentation          | 19/77     | 226/18670 | 4.80E-20 | 7.28E-18 | 5.47E-18 | PSMB8/PSM      | 19    |
| BP        | GO:0009615 response to virus infection                  | 21/77     | 323/18670 | 8.67E-20 | 1.20E-17 | 9.00E-18 | RTP4/IRF1/IFI3 | 21    |
| BP        | GO:0051607 defense response to virus infection          | 19/77     | 238/18670 | 1.29E-19 | 1.63E-17 | 1.22E-17 | RTP4/IRF1/IFI3 | 19    |
| BP        | GO:0019883 antigen processing and presentation          | 9/77      | 22/18670  | 1.01E-16 | 1.18E-14 | 8.90E-15 | TAP1/HLA-F     | 9     |
| BP        | GO:0002483 antigen processing and presentation          | 8/77      | 15/18670  | 3.62E-16 | 3.66E-14 | 2.75E-14 | TAP1/HLA-F     | 8     |
| BP        | GO:0019885 antigen processing and presentation          | 8/77      | 15/18670  | 3.62E-16 | 3.66E-14 | 2.75E-14 | TAP1/HLA-F     | 8     |
| BP        | GO:0002475 antigen processing and presentation          | 7/77      | 16/18670  | 1.70E-13 | 1.62E-11 | 1.22E-11 | HLA-F/HLA      | 7     |
| BP        | GO:0002479 antigen processing and presentation          | 10/77     | 75/18670  | 5.20E-13 | 4.64E-11 | 3.49E-11 | PSMB8/PSM      | 10    |
| BP        | GO:0042590 antigen processing and presentation          | 10/77     | 79/18670  | 8.91E-13 | 7.52E-11 | 5.65E-11 | PSMB8/PSM      | 10    |
| BP        | GO:0002474 antigen processing and presentation          | 10/77     | 96/18670  | 6.60E-12 | 5.27E-10 | 3.96E-10 | PSMB8/PSM      | 10    |
| BP        | GO:1903900 regulation of viral replication              | 11/77     | 149/18670 | 2.45E-11 | 1.86E-09 | 1.40E-09 | OASL/LAM       | 11    |
| BP        | GO:0050792 regulation of viral replication              | 12/77     | 208/18670 | 5.18E-11 | 3.75E-09 | 2.82E-09 | OASL/LAM       | 12    |
| BP        | GO:0045071 negative regulation of viral replication     | 8/77      | 59/18670  | 1.08E-10 | 7.29E-09 | 5.48E-09 | OASL/BST2      | 8     |
| BP        | GO:0043903 regulation of interferon production          | 12/77     | 222/18670 | 1.10E-10 | 7.29E-09 | 5.48E-09 | OASL/LAM       | 12    |
| BP        | GO:0045069 regulation of viral replication              | 9/77      | 95/18670  | 1.88E-10 | 1.19E-08 | 8.96E-09 | OASL/BST2      | 9     |
| BP        | GO:0019886 antigen processing and presentation          | 9/77      | 98/18670  | 2.50E-10 | 1.52E-08 | 1.14E-08 | HLA-DMA/HLA    | 9     |
| BP        | GO:0002495 antigen processing and presentation          | 9/77      | 101/18670 | 3.28E-10 | 1.85E-08 | 1.39E-08 | HLA-DMA/HLA    | 9     |
| BP        | GO:0048525 negative regulation of viral replication     | 9/77      | 101/18670 | 3.28E-10 | 1.85E-08 | 1.39E-08 | OASL/STAI      | 9     |
| BP        | GO:0002504 antigen processing and presentation          | 9/77      | 102/18670 | 3.59E-10 | 1.95E-08 | 1.46E-08 | HLA-DMA/HLA    | 9     |
| BP        | GO:0050852 T cell receptor signaling pathway            | 11/77     | 202/18670 | 6.49E-10 | 3.40E-08 | 2.55E-08 | PSMB8/PSM      | 11    |
| BP        | GO:0001916 positive regulation of cell growth           | 6/77      | 26/18670  | 8.70E-10 | 4.40E-08 | 3.31E-08 | HLA-F/HLA      | 6     |
| BP        | GO:0035456 response to interferon                       | 6/77      | 28/18670  | 1.41E-09 | 6.93E-08 | 5.21E-08 | IRF1/AIM2/IFI3 | 6     |
| BP        | GO:0019079 viral genome replication                     | 9/77      | 122/18670 | 1.79E-09 | 8.49E-08 | 6.38E-08 | OASL/BST2      | 9     |
| BP        | GO:1903901 negative regulation of viral replication     | 8/77      | 85/18670  | 2.15E-09 | 9.89E-08 | 7.43E-08 | OASL/BST2      | 8     |
| BP        | GO:0001914 regulation of T cell growth                  | 6/77      | 33/18670  | 4.09E-09 | 1.83E-07 | 1.37E-07 | HLA-F/HLA      | 6     |
| BP        | GO:0001819 positive regulation of cell growth           | 14/77     | 464/18670 | 5.67E-09 | 2.46E-07 | 1.85E-07 | IRF1/HLA-F     | 14    |
| BP        | GO:0001906 cell killing                                 | 9/77      | 168/18670 | 2.98E-08 | 1.26E-06 | 9.45E-07 | HLA-F/HLA      | 9     |
| BP        | GO:0002711 positive regulation of cell growth           | 6/77      | 48/18670  | 4.32E-08 | 1.77E-06 | 1.33E-06 | HLA-F/HLA      | 6     |
| BP        | GO:0001913 T cell mediated cytotoxicity                 | 6/77      | 49/18670  | 4.90E-08 | 1.96E-06 | 1.47E-06 | HLA-F/HLA      | 6     |
| BP        | GO:0050851 antigen receptor-nucleated signaling pathway | 11/77     | 316/18670 | 6.79E-08 | 2.64E-06 | 1.99E-06 | PSMB8/PSM      | 11    |
| BP        | GO:0019058 viral life cycle                             | 11/77     | 328/18670 | 9.90E-08 | 3.76E-06 | 2.82E-06 | OASL/LAM       | 11    |
| BP        | GO:0001912 positive regulation of cell growth           | 6/77      | 56/18670  | 1.11E-07 | 4.12E-06 | 3.10E-06 | HLA-F/HLA      | 6     |
| BP        | GO:0001909 leukocyte mediated immunity                  | 7/77      | 107/18670 | 2.88E-07 | 1.04E-05 | 7.83E-06 | HLA-F/HLA      | 7     |
| BP        | GO:0031343 positive regulation of cell growth           | 6/77      | 68/18670  | 3.61E-07 | 1.27E-05 | 9.57E-06 | HLA-F/HLA      | 6     |
| BP        | GO:0002709 regulation of T cell growth                  | 6/77      | 70/18670  | 4.29E-07 | 1.48E-05 | 1.11E-05 | HLA-F/HLA      | 6     |
| BP        | GO:0043122 regulation of interleukin production         | 9/77      | 237/18670 | 5.60E-07 | 1.89E-05 | 1.42E-05 | APOL3/UBI      | 9     |
| BP        | GO:0001910 regulation of leukocyte growth               | 6/77      | 78/18670  | 8.19E-07 | 2.70E-05 | 2.03E-05 | HLA-F/HLA      | 6     |
| BP        | GO:0043123 positive regulation of cell growth           | 8/77      | 183/18670 | 8.64E-07 | 2.79E-05 | 2.10E-05 | APOL3/UBI      | 8     |
| BP        | GO:0035458 cellular response to interferon              | 4/77      | 20/18670  | 1.23E-06 | 3.90E-05 | 2.93E-05 | IRF1/AIM2/IFI3 | 4     |
| BP        | GO:0035455 response to interferon                       | 4/77      | 21/18670  | 1.52E-06 | 4.70E-05 | 3.53E-05 | IFIT3/LAM      | 4     |
| BP        | GO:0007249 I-kappaB kinase activation                   | 9/77      | 269/18670 | 1.61E-06 | 4.88E-05 | 3.66E-05 | APOL3/UBI      | 9     |
| BP        | GO:0031341 regulation of cell growth                    | 6/77      | 98/18670  | 3.15E-06 | 9.36E-05 | 7.04E-05 | HLA-F/HLA      | 6     |
| BP        | GO:0002824 positive regulation of cell growth           | 6/77      | 100/18670 | 3.54E-06 | 0.000101 | 7.60E-05 | HLA-F/HLA      | 6     |
| BP        | GO:0002429 immune response                              | 11/77     | 473/18670 | 3.64E-06 | 0.000101 | 7.60E-05 | PSMB8/PSM      | 11    |
| BP        | GO:0002757 immune response                              | 11/77     | 473/18670 | 3.64E-06 | 0.000101 | 7.60E-05 | PSMB8/PSM      | 11    |
| BP        | GO:0070663 regulation of leukocyte growth               | 8/77      | 222/18670 | 3.66E-06 | 0.000101 | 7.60E-05 | IRF1/IDO1/IFI3 | 8     |
| BP        | GO:0002819 regulation of adaptive immunity              | 7/77      | 160/18670 | 4.33E-06 | 0.000117 | 8.82E-05 | IRF1/HLA-F     | 7     |
| BP        | GO:0030593 neutrophil chemotaxis                        | 6/77      | 104/18670 | 4.45E-06 | 0.000117 | 8.83E-05 | CXCL11/CE      | 6     |
| BP        | GO:0045088 regulation of innate immunity                | 9/77      | 305/18670 | 4.49E-06 | 0.000117 | 8.83E-05 | PSMB8/PSM      | 9     |
| BP        | GO:0002708 positive regulation of cell growth           | 6/77      | 105/18670 | 4.70E-06 | 0.000119 | 8.94E-05 | HLA-F/HLA      | 6     |
| BP        | GO:0002821 positive regulation of cell growth           | 6/77      | 105/18670 | 4.70E-06 | 0.000119 | 8.94E-05 | HLA-F/HLA      | 6     |
| BP        | GO:0002456 T cell mediated immunity                     | 6/77      | 106/18670 | 4.97E-06 | 0.000124 | 9.29E-05 | HLA-F/HLA      | 6     |
| BP        | GO:1990266 neutrophil migration                         | 6/77      | 118/18670 | 9.22E-06 | 0.000226 | 0.00017  | CXCL11/CE      | 6     |
| BP        | GO:0052548 regulation of endocytosis                    | 10/77     | 425/18670 | 9.46E-06 | 0.000228 | 0.00017  | PSMB8/PSM      | 10    |
| BP        | GO:0071621 granulocyte chemotaxis                       | 6/77      | 123/18670 | 1.17E-05 | 0.000278 | 0.00021  | CXCL11/CE      | 6     |
| BP        | GO:0002449 lymphocyte mediated immunity                 | 9/77      | 352/18670 | 1.42E-05 | 0.000331 | 0.00025  | HLA-F/HLA      | 9     |
| BP        | GO:0052547 regulation of peptidase activity             | 10/77     | 452/18670 | 1.61E-05 | 0.000371 | 0.00028  | PSMB8/PSM      | 10    |
| BP        | GO:0002697 regulation of immunity                       | 10/77     | 462/18670 | 1.95E-05 | 0.000441 | 0.00033  | HLA-F/HLA      | 10    |
| BP        | GO:0042110 T cell activation                            | 10/77     | 464/18670 | 2.02E-05 | 0.000451 | 0.00034  | IRF1/B2M/IFI3  | 10    |
| BP        | GO:0002705 positive regulation of cell growth           | 6/77      | 136/18670 | 2.07E-05 | 0.000456 | 0.00034  | HLA-F/HLA      | 6     |

|    |            |                     |      |           |           |          |         |            |   |
|----|------------|---------------------|------|-----------|-----------|----------|---------|------------|---|
| BP | GO:0002703 | regulation of leuk  | 7/77 | 205/18670 | 2.18E-05  | 0.000467 | 0.00035 | HLA-F/HLA  | 7 |
| BP | GO:0019835 | cytolysis           | 4/77 | 40/18670  | 2.18E-05  | 0.000467 | 0.00035 | GZMH/APO   | 4 |
| BP | GO:0070665 | positive regulatio  | 6/77 | 139/18670 | 2.35E-05  | 0.000495 | 0.00037 | CD74/BST2  | 6 |
| BP | GO:0050670 | regulation of lymph | 7/77 | 208/18670 | 2.39E-05  | 0.000498 | 0.00037 | IRF1/IDO1/ | 7 |
| BP | GO:0032944 | regulation of mon   | 7/77 | 209/18670 | 2.47E-05  | 0.000506 | 0.00038 | IRF1/IDO1/ | 7 |
| BP | GO:0097530 | granulocyte migra   | 6/77 | 141/18670 | 2.55E-05  | 0.000515 | 0.00039 | CXCL11/CE  | 6 |
| BP | GO:0045089 | positive regulatio  | 7/77 | 214/18670 | 2.87E-05  | 0.000574 | 0.00043 | PSMB8/PSM  | 7 |
| BP | GO:0002822 | regulation of adap  | 6/77 | 145/18670 | 2.98E-05  | 0.000588 | 0.00044 | HLA-F/HLA  | 6 |
| BP | GO:0070661 | leukocyte prolifer  | 8/77 | 298/18670 | 3.11E-05  | 0.000605 | 0.00045 | IRF1/IDO1/ | 8 |
| BP | GO:0002699 | positive regulatio  | 7/77 | 219/18670 | 3.33E-05  | 0.000639 | 0.00048 | HLA-F/HLA  | 7 |
| BP | GO:0002706 | regulation of lymph | 6/77 | 149/18670 | 3.47E-05  | 0.000659 | 0.0005  | HLA-F/HLA  | 6 |
| BP | GO:0030595 | leukocyte chemot    | 7/77 | 224/18670 | 3.84E-05  | 0.000717 | 0.00054 | CXCL11/CE  | 7 |
| BP | GO:0002831 | regulation of resp  | 9/77 | 400/18670 | 3.87E-05  | 0.000717 | 0.00054 | PSMB8/PSM  | 9 |
| BP | GO:0034612 | response to tumor   | 8/77 | 312/18670 | 4.30E-05  | 0.000787 | 0.00059 | PSMB8/PSM  | 8 |
| BP | GO:0042129 | regulation of T cel | 6/77 | 156/18670 | 4.49E-05  | 0.000804 | 0.0006  | IRF1/IDO1/ | 6 |
| BP | GO:0050863 | regulation of T cel | 8/77 | 314/18670 | 4.50E-05  | 0.000804 | 0.0006  | IRF1/IDO1/ | 8 |
| BP | GO:2000116 | regulation of cyste | 7/77 | 239/18670 | 5.79E-05  | 0.001023 | 0.00077 | PSMB9/LAN  | 7 |
| BP | GO:0050663 | cytokine secretion  | 7/77 | 240/18670 | 5.95E-05  | 0.001038 | 0.00078 | GBP1/AIM2  | 7 |
| BP | GO:0002833 | positive regulatio  | 7/77 | 249/18670 | 7.50E-05  | 0.001293 | 0.00097 | PSMB8/PSM  | 7 |
| BP | GO:0002237 | response to molec   | 8/77 | 343/18670 | 8.36E-05  | 0.001425 | 0.00107 | B2M/CXCL   | 8 |
| BP | GO:0032069 | regulation of nucl  | 3/77 | 22/18670  | 9.82E-05  | 0.001656 | 0.00124 | OASL/OAS2  | 3 |
| BP | GO:0032732 | positive regulatio  | 4/77 | 59/18670  | 0.0001025 | 0.001709 | 0.00128 | AIM2/CASP  | 4 |
| BP | GO:0042098 | T cell proliferatio | 6/77 | 184/18670 | 0.0001121 | 0.00184  | 0.00138 | IRF1/IDO1/ | 6 |
| BP | GO:0032612 | interleukin-1 prod  | 5/77 | 115/18670 | 0.0001127 | 0.00184  | 0.00138 | AIM2/CASP  | 5 |
| BP | GO:0050701 | interleukin-1 secr  | 4/77 | 61/18670  | 0.0001168 | 0.001886 | 0.00142 | AIM2/CASP  | 4 |
| BP | GO:0002460 | adaptive immune r   | 8/77 | 361/18670 | 0.0001191 | 0.001902 | 0.00143 | HLA-F/HLA  | 8 |
| BP | GO:0046651 | lymphocyte prolif   | 7/77 | 272/18670 | 0.00013   | 0.002055 | 0.00154 | IRF1/IDO1/ | 7 |
| BP | GO:0032943 | mononuclear cell    | 7/77 | 274/18670 | 0.000136  | 0.002128 | 0.0016  | IRF1/IDO1/ | 7 |
| BP | GO:0048247 | lymphocyte chem     | 4/77 | 64/18670  | 0.0001408 | 0.002182 | 0.00164 | CXCL11/CX  | 4 |
| BP | GO:1903706 | regulation of hem   | 9/77 | 475/18670 | 0.0001441 | 0.00221  | 0.00166 | PSMB8/PSM  | 9 |
| BP | GO:0019730 | antimicrobial hum   | 5/77 | 122/18670 | 0.0001489 | 0.00226  | 0.0017  | CXCL11/GN  | 5 |
| BP | GO:0051249 | regulation of lymph | 9/77 | 485/18670 | 0.0001685 | 0.002532 | 0.0019  | IRF1/HLA-F | 9 |
| BP | GO:0032479 | regulation of type  | 5/77 | 126/18670 | 0.0001732 | 0.002577 | 0.00194 | IRF1/UBE2I | 5 |
| BP | GO:0031349 | positive regulatio  | 8/77 | 384/18670 | 0.0001818 | 0.002679 | 0.00201 | PSMB8/PSM  | 8 |
| BP | GO:0032606 | type I interferon p | 5/77 | 128/18670 | 0.0001864 | 0.002721 | 0.00205 | IRF1/UBE2I | 5 |
| BP | GO:0071356 | cellular response t | 7/77 | 291/18670 | 0.0001969 | 0.002847 | 0.00214 | PSMB8/PSM  | 7 |
| BP | GO:0050671 | positive regulatio  | 5/77 | 130/18670 | 0.0002004 | 0.00287  | 0.00216 | CD74/HLA-  | 5 |
| BP | GO:0001773 | myeloid dendritic   | 3/77 | 28/18670  | 0.0002052 | 0.002884 | 0.00217 | BATF2/UBI  | 3 |
| BP | GO:0010818 | T cell chemotaxis   | 3/77 | 28/18670  | 0.0002052 | 0.002884 | 0.00217 | CXCL11/CX  | 3 |
| BP | GO:0032946 | positive regulatio  | 5/77 | 131/18670 | 0.0002077 | 0.002892 | 0.00217 | CD74/HLA-  | 5 |
| BP | GO:0070229 | negative regulatio  | 3/77 | 29/18670  | 0.0002281 | 0.003146 | 0.00236 | IDO1/CD74/ | 3 |
| BP | GO:0097529 | myeloid leukocyte   | 6/77 | 210/18670 | 0.00023   | 0.003146 | 0.00236 | CXCL11/CE  | 6 |
| BP | GO:0061844 | antimicrobial hum   | 4/77 | 73/18670  | 0.0002346 | 0.00318  | 0.00239 | CXCL11/GN  | 4 |
| BP | GO:0060326 | cell chemotaxis     | 7/77 | 304/18670 | 0.000257  | 0.003423 | 0.00257 | CXCL11/CE  | 7 |
| BP | GO:1903037 | regulation of leuk  | 7/77 | 304/18670 | 0.000257  | 0.003423 | 0.00257 | IRF1/IDO1/ | 7 |
| BP | GO:0002718 | regulation of cytol | 4/77 | 84/18670  | 0.0004019 | 0.005305 | 0.00399 | HLA-F/B2M  | 4 |
| BP | GO:0032496 | response to lipopc  | 7/77 | 330/18670 | 0.0004216 | 0.005517 | 0.00415 | CXCL11/ID  | 7 |
| BP | GO:0002690 | positive regulatio  | 4/77 | 87/18670  | 0.0004593 | 0.005959 | 0.00448 | CD74/CXCI  | 4 |
| BP | GO:0007159 | leukocyte cell-cell | 7/77 | 337/18670 | 0.0004779 | 0.006119 | 0.0046  | IRF1/IDO1/ | 7 |
| BP | GO:0070098 | chemokine-media     | 4/77 | 88/18670  | 0.0004797 | 0.006119 | 0.0046  | CXCL11/CX  | 4 |
| BP | GO:0050716 | positive regulatio  | 3/77 | 38/18670  | 0.0005129 | 0.006488 | 0.00488 | AIM2/CASP  | 3 |
| BP | GO:0051281 | positive regulatio  | 3/77 | 40/18670  | 0.0005971 | 0.007491 | 0.00563 | CXCL11/CX  | 3 |
| BP | GO:0033209 | tumor necrosis fac  | 5/77 | 167/18670 | 0.0006338 | 0.007887 | 0.00593 | PSMB8/PSM  | 5 |
| BP | GO:0042102 | positive regulator  | 4/77 | 95/18670  | 0.0006408 | 0.007909 | 0.00594 | HLA-DPA1/  | 4 |
| BP | GO:1990868 | response to chemc   | 4/77 | 97/18670  | 0.0006931 | 0.008417 | 0.00633 | CXCL11/CX  | 4 |
| BP | GO:1990869 | cellular response t | 4/77 | 97/18670  | 0.0006931 | 0.008417 | 0.00633 | CXCL11/CX  | 4 |
| BP | GO:0071104 | response to interle | 2/77 | 10/18670  | 0.0007395 | 0.008909 | 0.0067  | STAT1/IL2F | 2 |
| BP | GO:0032611 | interleukin-1 beta  | 4/77 | 101/18670 | 0.0008067 | 0.009567 | 0.00719 | AIM2/CASP  | 4 |
| BP | GO:0032649 | regulation of inter | 4/77 | 101/18670 | 0.0008067 | 0.009567 | 0.00719 | CD2/ISG15/ | 4 |
| BP | GO:0002367 | cytokine productio  | 4/77 | 102/18670 | 0.000837  | 0.009849 | 0.0074  | HLA-F/B2M  | 4 |
| BP | GO:0032652 | regulation of inter | 4/77 | 103/18670 | 0.0008681 | 0.010137 | 0.00762 | AIM2/CASP  | 4 |
| BP | GO:0045646 | regulation of eryth | 3/77 | 47/18670  | 0.0009599 | 0.011039 | 0.0083  | B2M/STAT1  | 3 |
| BP | GO:2000107 | negative regulatio  | 3/77 | 47/18670  | 0.0009599 | 0.011039 | 0.0083  | IDO1/CD74/ | 3 |
| BP | GO:0002696 | positive regulatio  | 7/77 | 380/18670 | 0.0009691 | 0.011061 | 0.00831 | HLA-F/CD7  | 7 |
| BP | GO:0050900 | leukocyte migratio  | 8/77 | 499/18670 | 0.0010294 | 0.011662 | 0.00877 | CXCL11/CE  | 8 |
| BP | GO:0002791 | regulation of pepti | 8/77 | 500/18670 | 0.0010427 | 0.011725 | 0.00881 | GBP1/CD74  | 8 |
| BP | GO:0031581 | hemidesmosome a     | 2/77 | 12/18670  | 0.0010788 | 0.012042 | 0.00905 | LAMB3/CO   | 2 |
| BP | GO:0072676 | lymphocyte migra    | 4/77 | 111/18670 | 0.0011471 | 0.01271  | 0.00955 | CXCL11/CX  | 4 |
| BP | GO:0050867 | positive regulator  | 7/77 | 394/18670 | 0.0011949 | 0.013144 | 0.00988 | HLA-F/CD7  | 7 |
| BP | GO:0032609 | interferon-gamma    | 4/77 | 113/18670 | 0.0012256 | 0.013385 | 0.01006 | CD2/ISG15/ | 4 |

|    |            |                      |      |           |           |          |         |             |   |
|----|------------|----------------------|------|-----------|-----------|----------|---------|-------------|---|
| BP | GO:0002688 | regulation of leuk   | 4/77 | 114/18670 | 0.0012662 | 0.01369  | 0.01029 | CD74/CXCL   | 4 |
| BP | GO:0045059 | positive thymic T    | 2/77 | 13/18670  | 0.0012716 | 0.01369  | 0.01029 | CD74/CD3E   | 2 |
| BP | GO:0032731 | positive regulator   | 3/77 | 52/18670  | 0.0012891 | 0.01378  | 0.01036 | AIM2/CASP   | 3 |
| BP | GO:0022407 | regulation of cell-  | 7/77 | 402/18670 | 0.0013413 | 0.014069 | 0.01058 | IRF1/IDO1/C | 7 |
| BP | GO:0045785 | positive regulator   | 7/77 | 403/18670 | 0.0013606 | 0.014069 | 0.01058 | CD74/HLA-   | 7 |
| BP | GO:0050702 | interleukin-1 beta   | 3/77 | 53/18670  | 0.0013624 | 0.014069 | 0.01058 | AIM2/CASP   | 3 |
| BP | GO:0050704 | regulation of inter  | 3/77 | 53/18670  | 0.0013624 | 0.014069 | 0.01058 | AIM2/CASP   | 3 |
| BP | GO:0070228 | regulation of lymf   | 3/77 | 53/18670  | 0.0013624 | 0.014069 | 0.01058 | IDO1/CD74/  | 3 |
| BP | GO:0001818 | negative regulatio   | 6/77 | 296/18670 | 0.001394  | 0.014298 | 0.01075 | HLA-F/UBE   | 6 |
| BP | GO:0002720 | positive regulator   | 3/77 | 54/18670  | 0.0014383 | 0.014555 | 0.01094 | HLA-F/B2M   | 3 |
| BP | GO:0010524 | positive regulator   | 3/77 | 54/18670  | 0.0014383 | 0.014555 | 0.01094 | CXCL11/CX   | 3 |
| BP | GO:0070234 | positive regulator   | 2/77 | 14/18670  | 0.0014795 | 0.014815 | 0.01114 | IDO1/CCL5   | 2 |
| BP | GO:0050870 | positive regulator   | 5/77 | 202/18670 | 0.0014834 | 0.014815 | 0.01114 | CD74/HLA-   | 5 |
| BP | GO:0071222 | cellular response t  | 5/77 | 205/18670 | 0.0015829 | 0.015705 | 0.0118  | CXCL11/CA   | 5 |
| BP | GO:0030099 | myeloid cell differ  | 7/77 | 416/18670 | 0.0016312 | 0.016079 | 0.01209 | BATF2/B2M   | 7 |
| BP | GO:0051928 | positive regulator   | 4/77 | 123/18670 | 0.0016753 | 0.016407 | 0.01233 | CXCL11/CX   | 4 |
| BP | GO:0009612 | response to mech     | 5/77 | 210/18670 | 0.0017594 | 0.017012 | 0.01279 | IRF1/CASP1  | 5 |
| BP | GO:0050707 | regulation of cytol  | 5/77 | 210/18670 | 0.0017594 | 0.017012 | 0.01279 | GBP1/AIM2   | 5 |
| BP | GO:0071219 | cellular response t  | 5/77 | 212/18670 | 0.001834  | 0.01762  | 0.01324 | CXCL11/CA   | 5 |
| BP | GO:0002687 | positive regulator   | 4/77 | 128/18670 | 0.0019384 | 0.018412 | 0.01384 | CD74/CXCL   | 4 |
| BP | GO:0002830 | positive regulator   | 2/77 | 16/18670  | 0.0019406 | 0.018412 | 0.01384 | IDO1/CD74   | 2 |
| BP | GO:1903039 | positive regulator   | 5/77 | 218/18670 | 0.0020714 | 0.019531 | 0.01468 | CD74/HLA-   | 5 |
| BP | GO:0002683 | negative regulatio   | 7/77 | 435/18670 | 0.0021002 | 0.01968  | 0.01479 | IRF1/HLA-F  | 7 |
| BP | GO:0010819 | regulation of T cel  | 2/77 | 17/18670  | 0.0021935 | 0.020428 | 0.01536 | CXCL10/CC   | 2 |
| BP | GO:0050921 | positive regulator   | 4/77 | 135/18670 | 0.0023528 | 0.021778 | 0.01637 | CD74/CXCL   | 4 |
| BP | GO:0032729 | positive regulator   | 3/77 | 65/18670  | 0.0024519 | 0.021976 | 0.01652 | CD2/HLA-D   | 3 |
| BP | GO:0072678 | T cell migration     | 3/77 | 65/18670  | 0.0024519 | 0.021976 | 0.01652 | CXCL11/CX   | 3 |
| BP | GO:0043011 | myeloid dendritic    | 2/77 | 18/18670  | 0.0024611 | 0.021976 | 0.01652 | BATF2/UBE   | 2 |
| BP | GO:0070230 | positive regulator   | 2/77 | 18/18670  | 0.0024611 | 0.021976 | 0.01652 | IDO1/CCL5   | 2 |
| BP | GO:0070233 | negative regulatio   | 2/77 | 18/18670  | 0.0024611 | 0.021976 | 0.01652 | IDO1/CCL5   | 2 |
| BP | GO:0090026 | positive regulator   | 2/77 | 18/18670  | 0.0024611 | 0.021976 | 0.01652 | CXCL10/CC   | 2 |
| BP | GO:0051251 | positive regulator   | 6/77 | 334/18670 | 0.0025594 | 0.02272  | 0.01708 | HLA-F/CD7   | 6 |
| BP | GO:0002700 | regulation of prod   | 4/77 | 139/18670 | 0.0026152 | 0.022947 | 0.01725 | HLA-F/B2M   | 4 |
| BP | GO:0050715 | positive regulator   | 4/77 | 139/18670 | 0.0026152 | 0.022947 | 0.01725 | AIM2/CASP   | 4 |
| BP | GO:0002544 | chronic inflammat    | 2/77 | 19/18670  | 0.0027433 | 0.023933 | 0.01799 | IDO1/CCL5   | 2 |
| BP | GO:0050918 | positive chemotax    | 3/77 | 68/18670  | 0.0027884 | 0.024187 | 0.01818 | CXCL10/CC   | 3 |
| BP | GO:0002218 | activation of innat  | 4/77 | 142/18670 | 0.0028247 | 0.024363 | 0.01831 | PSMB8/PSM   | 4 |
| BP | GO:0070227 | lymphocyte apopt     | 3/77 | 69/18670  | 0.0029066 | 0.024893 | 0.01871 | IDO1/CD74/  | 3 |
| BP | GO:0071216 | cellular response t  | 5/77 | 236/18670 | 0.002919  | 0.024893 | 0.01871 | CXCL11/CA   | 5 |
| BP | GO:0051346 | negative regulatio   | 7/77 | 463/18670 | 0.0029749 | 0.025228 | 0.01896 | LAMP3/GZL   | 7 |
| BP | GO:0033077 | T cell differentiati | 3/77 | 70/18670  | 0.0030278 | 0.025534 | 0.01919 | B2M/CD74/   | 3 |
| BP | GO:0051250 | negative regulatio   | 4/77 | 146/18670 | 0.0031215 | 0.026147 | 0.01965 | IRF1/HLA-F  | 4 |
| BP | GO:0030217 | T cell differentiati | 5/77 | 240/18670 | 0.003137  | 0.026147 | 0.01965 | IRF1/B2M/C  | 5 |
| BP | GO:1904427 | positive regulator   | 3/77 | 71/18670  | 0.0031521 | 0.026147 | 0.01965 | CXCL11/CX   | 3 |
| BP | GO:0050708 | regulation of prot   | 7/77 | 472/18670 | 0.0033084 | 0.027257 | 0.02049 | GBP1/AIM2   | 7 |
| BP | GO:0045061 | thymic T cell sele   | 2/77 | 21/18670  | 0.0033511 | 0.027257 | 0.02049 | CD74/CD3E   | 2 |
| BP | GO:1901739 | regulation of myoi   | 2/77 | 21/18670  | 0.0033511 | 0.027257 | 0.02049 | CXCL10/CX   | 2 |
| BP | GO:2001056 | positive regulator   | 4/77 | 149/18670 | 0.0033577 | 0.027257 | 0.02049 | AIM2/CASP   | 4 |
| BP | GO:0006959 | humoral immune r     | 6/77 | 356/18670 | 0.0035051 | 0.028302 | 0.02127 | CXCL11/GN   | 6 |
| BP | GO:0072643 | interferon-gamma     | 2/77 | 22/18670  | 0.0036764 | 0.029528 | 0.0222  | CD2/ISG15   | 2 |
| BP | GO:0010951 | negative regulatio   | 5/77 | 250/18670 | 0.0037333 | 0.029827 | 0.02242 | LAMP3/BS1   | 5 |
| BP | GO:0061025 | membrane fusion      | 4/77 | 154/18670 | 0.0037779 | 0.030025 | 0.02257 | TAP1/TAP2   | 4 |
| BP | GO:0032481 | positive regulator   | 3/77 | 77/18670  | 0.0039635 | 0.031337 | 0.02356 | IRF1/STAT1  | 3 |
| BP | GO:0010499 | proteasomal ubiq     | 2/77 | 23/18670  | 0.0040158 | 0.031423 | 0.02362 | PSMB8/PSM   | 2 |
| BP | GO:0045109 | intermediate filam   | 2/77 | 23/18670  | 0.0040158 | 0.031423 | 0.02362 | KRT20/KRT   | 2 |
| BP | GO:0022409 | positive regulator   | 5/77 | 255/18670 | 0.0040602 | 0.031607 | 0.02376 | CD74/HLA-   | 5 |
| BP | GO:0042832 | defense response t   | 2/77 | 24/18670  | 0.0043692 | 0.033667 | 0.02531 | BATF2/GBF   | 2 |
| BP | GO:0071677 | positive regulator   | 2/77 | 24/18670  | 0.0043692 | 0.033667 | 0.02531 | CXCL10/CC   | 2 |
| BP | GO:0010466 | negative regulatio   | 5/77 | 262/18670 | 0.0045516 | 0.034896 | 0.02623 | LAMP3/BS1   | 5 |
| BP | GO:0051279 | regulation of relea  | 3/77 | 82/18670  | 0.0047285 | 0.035594 | 0.02676 | CXCL11/CX   | 3 |
| BP | GO:0001562 | response to protoz   | 2/77 | 25/18670  | 0.0047365 | 0.035594 | 0.02676 | BATF2/GBF   | 2 |
| BP | GO:0002719 | negative regulatio   | 2/77 | 25/18670  | 0.0047365 | 0.035594 | 0.02676 | HLA-F/BST   | 2 |
| BP | GO:0090025 | regulation of mon    | 2/77 | 25/18670  | 0.0047365 | 0.035594 | 0.02676 | CXCL10/CC   | 2 |
| BP | GO:2000106 | regulation of leuk   | 3/77 | 83/18670  | 0.0048914 | 0.036577 | 0.02749 | IDO1/CD74/  | 3 |
| BP | GO:0002230 | positive regulator   | 2/77 | 26/18670  | 0.0051176 | 0.037895 | 0.02848 | AIM2/STAT   | 2 |
| BP | GO:0010996 | response to audito   | 2/77 | 26/18670  | 0.0051176 | 0.037895 | 0.02848 | CXCL10/PT   | 2 |
| BP | GO:0051100 | negative regulatio   | 4/77 | 169/18670 | 0.0052496 | 0.038684 | 0.02908 | B2M/GZMA    | 4 |
| BP | GO:1901623 | regulation of lymf   | 2/77 | 27/18670  | 0.0055123 | 0.040423 | 0.03039 | CXCL10/CC   | 2 |
| BP | GO:0051262 | protein tetrameriz   | 4/77 | 172/18670 | 0.005584  | 0.040753 | 0.03063 | B2M/CD74/   | 4 |
| BP | GO:2000108 | positive regulator   | 2/77 | 28/18670  | 0.0059205 | 0.042883 | 0.03223 | IDO1/CCL5   | 2 |

|    |            |                     |      |           |           |          |         |             |   |
|----|------------|---------------------|------|-----------|-----------|----------|---------|-------------|---|
| BP | GO:0002695 | negative regulatio  | 4/77 | 175/18670 | 0.0059324 | 0.042883 | 0.03223 | IRF1/HLA-F  | 4 |
| BP | GO:0032651 | regulation of inter | 3/77 | 90/18670  | 0.0061269 | 0.043871 | 0.03298 | AIM2/CASP   | 3 |
| BP | GO:0045778 | positive regulatior | 3/77 | 90/18670  | 0.0061269 | 0.043871 | 0.03298 | ISG15/IFITM | 3 |
| BP | GO:0001959 | regulation of cytol | 4/77 | 177/18670 | 0.0061726 | 0.043991 | 0.03307 | CD74/CASP   | 4 |
| BP | GO:0010950 | positive regulatior | 4/77 | 178/18670 | 0.0062951 | 0.044571 | 0.0335  | AIM2/CASP   | 4 |
| BP | GO:0045639 | positive regulatior | 3/77 | 91/18670  | 0.0063172 | 0.044571 | 0.0335  | CD74/STAT   | 3 |
| BP | GO:0060142 | regulation of sync  | 2/77 | 29/18670  | 0.0063422 | 0.044571 | 0.0335  | CXCL10/CX   | 2 |
| BP | GO:0071347 | cellular response t | 4/77 | 179/18670 | 0.0064192 | 0.044905 | 0.03375 | PSMB8/PSM   | 4 |
| BP | GO:2000117 | negative regulatio  | 3/77 | 92/18670  | 0.006511  | 0.045259 | 0.03402 | LAMP3/IFI1  | 3 |
| BP | GO:1905330 | regulation of mori  | 4/77 | 180/18670 | 0.0065449 | 0.045259 | 0.03402 | PSMB8/PSM   | 4 |
| BP | GO:0002440 | production of mol   | 5/77 | 286/18670 | 0.0065592 | 0.045259 | 0.03402 | HLA-F/B2M   | 5 |
| BP | GO:0002828 | regulation of type  | 2/77 | 30/18670  | 0.0067771 | 0.046341 | 0.03483 | IDO1/CD74   | 2 |
| BP | GO:0046596 | regulation of viral | 2/77 | 30/18670  | 0.0067771 | 0.046341 | 0.03483 | CD74/IFITM  | 2 |
| BP | GO:0006906 | vesicle fusion      | 3/77 | 94/18670  | 0.0069092 | 0.047032 | 0.03535 | TAP1/TAP2   | 3 |
| BP | GO:0002702 | positive regulatior | 3/77 | 95/18670  | 0.0071136 | 0.048207 | 0.03624 | HLA-F/B2M   | 3 |
| BP | GO:0002724 | regulation of T cel | 2/77 | 31/18670  | 0.0072253 | 0.048317 | 0.03632 | HLA-F/B2M   | 2 |
| BP | GO:0045648 | positive regulatior | 2/77 | 31/18670  | 0.0072253 | 0.048317 | 0.03632 | STAT1/ISG1  | 2 |
| BP | GO:2000406 | positive regulatior | 2/77 | 31/18670  | 0.0072253 | 0.048317 | 0.03632 | CXCL10/CC   | 2 |

| ONTOLOGY ID | Description                 | GeneRatio | BgRatio   | pvalue    | p.adjust | qvalue   | geneID     | Count |
|-------------|-----------------------------|-----------|-----------|-----------|----------|----------|------------|-------|
| CC          | GO:0042611 MHC protein      | 15/79     | 25/19717  | 8.49E-31  | 1.07E-28 | 5.90E-29 | HLA-F/HLA- | 15    |
| CC          | GO:0071556 integral comp    | 13/79     | 29/19717  | 1.57E-24  | 6.57E-23 | 3.62E-23 | HLA-F/HLA- | 13    |
| CC          | GO:0098553 luminal side c   | 13/79     | 29/19717  | 1.57E-24  | 6.57E-23 | 3.62E-23 | HLA-F/HLA- | 13    |
| CC          | GO:0098576 luminal side c   | 13/79     | 34/19717  | 2.11E-23  | 6.64E-22 | 3.66E-22 | HLA-F/HLA- | 13    |
| CC          | GO:0012507 ER to Golgi tr   | 14/79     | 62/19717  | 2.04E-21  | 5.13E-20 | 2.83E-20 | HLA-F/HLA- | 14    |
| CC          | GO:0030176 integral comp    | 16/79     | 150/19717 | 7.95E-19  | 1.67E-17 | 9.21E-18 | TAP1/HLA-F | 16    |
| CC          | GO:0030134 COPII-coated     | 14/79     | 93/19717  | 9.44E-19  | 1.70E-17 | 9.37E-18 | HLA-F/HLA- | 14    |
| CC          | GO:0042613 MHC class II     | 9/79      | 16/19717  | 1.86E-18  | 2.61E-17 | 1.44E-17 | HLA-DMA/C  | 9     |
| CC          | GO:0031227 intrinsic comp   | 16/79     | 158/19717 | 1.86E-18  | 2.61E-17 | 1.44E-17 | TAP1/HLA-F | 16    |
| CC          | GO:0030666 endocytic vesic  | 16/79     | 167/19717 | 4.59E-18  | 5.79E-17 | 3.19E-17 | TAP1/HLA-F | 16    |
| CC          | GO:0030660 Golgi-associated | 14/79     | 114/19717 | 1.86E-17  | 2.13E-16 | 1.18E-16 | HLA-F/HLA- | 14    |
| CC          | GO:0030139 endocytic vesic  | 18/79     | 303/19717 | 1.63E-16  | 1.71E-15 | 9.45E-16 | TAP1/HLA-F | 18    |
| CC          | GO:0030662 coated vesicle   | 15/79     | 182/19717 | 5.41E-16  | 5.24E-15 | 2.89E-15 | HLA-F/HLA- | 15    |
| CC          | GO:0005798 Golgi-associated | 14/79     | 178/19717 | 1.06E-14  | 9.58E-14 | 5.28E-14 | HLA-F/HLA- | 14    |
| CC          | GO:0030658 transport vesic  | 14/79     | 208/19717 | 9.27E-14  | 7.79E-13 | 4.29E-13 | HLA-F/HLA- | 14    |
| CC          | GO:0030135 coated vesicle   | 15/79     | 289/19717 | 5.01E-13  | 3.94E-12 | 2.17E-12 | HLA-F/HLA- | 15    |
| CC          | GO:0031301 integral comp    | 16/79     | 350/19717 | 5.41E-13  | 4.01E-12 | 2.21E-12 | TAP1/HLA-F | 16    |
| CC          | GO:0031300 intrinsic comp   | 16/79     | 381/19717 | 1.97E-12  | 1.38E-11 | 7.60E-12 | TAP1/HLA-F | 16    |
| CC          | GO:0030669 clathrin-coate   | 8/79      | 44/19717  | 7.28E-12  | 4.83E-11 | 2.66E-11 | CD74/HLA-C | 8     |
| CC          | GO:0045334 clathrin-coate   | 8/79      | 63/19717  | 1.50E-10  | 9.43E-10 | 5.20E-10 | CD74/HLA-C | 8     |
| CC          | GO:0030133 transport vesic  | 14/79     | 392/19717 | 4.61E-10  | 2.77E-09 | 1.53E-09 | HLA-F/HLA- | 14    |
| CC          | GO:0010008 endosome mem     | 15/79     | 479/19717 | 6.32E-10  | 3.62E-09 | 2.00E-09 | HLA-F/HLA- | 15    |
| CC          | GO:0030670 phagocytic ve    | 8/79      | 76/19717  | 6.99E-10  | 3.83E-09 | 2.11E-09 | TAP1/HLA-F | 8     |
| CC          | GO:0030665 clathrin-coate   | 9/79      | 115/19717 | 8.32E-10  | 4.37E-09 | 2.41E-09 | CD74/HLA-C | 9     |
| CC          | GO:0005765 lysosomal mem    | 13/79     | 354/19717 | 1.47E-09  | 7.36E-09 | 4.06E-09 | HLA-F/HLA- | 13    |
| CC          | GO:0098852 lytic vacuole    | 13/79     | 355/19717 | 1.52E-09  | 7.36E-09 | 4.06E-09 | HLA-F/HLA- | 13    |
| CC          | GO:0045335 phagocytic ve    | 9/79      | 132/19717 | 2.84E-09  | 1.33E-08 | 7.31E-09 | TAP1/HLA-F | 9     |
| CC          | GO:0032588 trans-Golgi ne   | 8/79      | 92/19717  | 3.28E-09  | 1.48E-08 | 8.14E-09 | CD74/HLA-C | 8     |
| CC          | GO:0005774 vacuolar mem     | 13/79     | 412/19717 | 9.07E-09  | 3.94E-08 | 2.17E-08 | HLA-F/HLA- | 13    |
| CC          | GO:0009897 external side c  | 12/79     | 393/19717 | 5.12E-08  | 2.15E-07 | 1.18E-07 | HLA-F/HLA- | 12    |
| CC          | GO:0030136 clathrin-coate   | 9/79      | 188/19717 | 6.23E-08  | 2.53E-07 | 1.40E-07 | CD74/HLA-C | 9     |
| CC          | GO:0055038 recycling end    | 6/79      | 81/19717  | 8.72E-07  | 3.43E-06 | 1.89E-06 | HLA-F/HLA- | 6     |
| CC          | GO:0005802 trans-Golgi ne   | 8/79      | 236/19717 | 4.70E-06  | 1.79E-05 | 9.89E-06 | CD74/HLA-C | 8     |
| CC          | GO:0031901 early endosom    | 6/79      | 149/19717 | 2.97E-05  | 0.00011  | 6.07E-05 | HLA-F/HLA- | 6     |
| CC          | GO:0005770 late endosome    | 7/79      | 256/19717 | 7.49E-05  | 0.000263 | 0.000145 | HLA-DMA/L  | 7     |
| CC          | GO:0055037 recycling end    | 6/79      | 176/19717 | 7.53E-05  | 0.000263 | 0.000145 | HLA-F/HLA- | 6     |
| CC          | GO:0005769 early endosom    | 8/79      | 350/19717 | 7.93E-05  | 0.00027  | 0.000149 | HLA-F/HLA- | 8     |
| CC          | GO:0098791 Golgi apparatus  | 8/79      | 359/19717 | 9.46E-05  | 0.000314 | 0.000173 | CD74/HLA-C | 8     |
| CC          | GO:0031984 organelle subc   | 8/79      | 380/19717 | 0.00014   | 0.000452 | 0.000249 | CD74/HLA-C | 8     |
| CC          | GO:0031902 late endosome    | 5/79      | 134/19717 | 0.0002026 | 0.000638 | 0.000352 | HLA-DMA/L  | 5     |
| CC          | GO:0019774 proteasome cc    | 2/79      | 11/19717  | 0.0008516 | 0.002617 | 0.001443 | PSMB8/PSM  | 2     |
| CC          | GO:0061702 inflammasom      | 2/79      | 14/19717  | 0.0013981 | 0.004194 | 0.002313 | AIM2/CASP1 | 2     |
| CC          | GO:0005839 proteasome cc    | 2/79      | 20/19717  | 0.002874  | 0.00823  | 0.004538 | PSMB8/PSM  | 2     |
| CC          | GO:0071682 endocytic vesic  | 2/79      | 20/19717  | 0.002874  | 0.00823  | 0.004538 | GNLY/SAA1  | 2     |
| CC          | GO:0034364 high-density l   | 2/79      | 26/19717  | 0.0048402 | 0.013553 | 0.007473 | APOL1/SAA1 | 2     |
| CC          | GO:0005604 basement mem     | 3/79      | 95/19717  | 0.0065778 | 0.018017 | 0.009934 | LAMB3/PTN  | 3     |
| CC          | GO:0001772 immunologic      | 2/79      | 36/19717  | 0.009143  | 0.024511 | 0.013515 | GZMA/GZMI  | 2     |
| CC          | GO:0034358 plasma lipopr    | 2/79      | 37/19717  | 0.0096406 | 0.02479  | 0.013669 | APOL1/SAA1 | 2     |
| CC          | GO:1990777 lipoprotein pa   | 2/79      | 37/19717  | 0.0096406 | 0.02479  | 0.013669 | APOL1/SAA1 | 2     |
| CC          | GO:0032994 protein-lipid c  | 2/79      | 39/19717  | 0.010671  | 0.026891 | 0.014827 | APOL1/SAA1 | 2     |
| CC          | GO:0005771 multivesicular   | 2/79      | 51/19717  | 0.0178024 | 0.043983 | 0.024251 | CD74/BST2  | 2     |

## MF

| ONTOLOGY ID | Description               | GeneRatio | BgRatio   | pvalue   | p.adjust | qvalue   | geneID      | Count |
|-------------|---------------------------|-----------|-----------|----------|----------|----------|-------------|-------|
| MF          | GO:0042605 peptide antige | 13/75     | 31/17696  | 9.23E-24 | 1.58E-21 | 1.13E-21 | TAP1/HLA-F  | 13    |
| MF          | GO:0003823 antigen bindir | 13/75     | 160/17696 | 1.29E-13 | 1.10E-11 | 7.85E-12 | TAP1/HLA-F  | 13    |
| MF          | GO:0042277 peptide bindir | 14/75     | 295/17696 | 2.12E-11 | 1.21E-09 | 8.63E-10 | TAP1/HLA-F  | 14    |
| MF          | GO:0033218 amide binding  | 14/75     | 356/17696 | 2.55E-10 | 1.01E-08 | 7.23E-09 | TAP1/HLA-F  | 14    |
| MF          | GO:0032395 MHC class II   | 5/75      | 10/17696  | 2.96E-10 | 1.01E-08 | 7.23E-09 | HLA-DQB1/F  | 5     |
| MF          | GO:0023026 MHC class II   | 4/75      | 16/17696  | 5.21E-07 | 1.49E-05 | 1.06E-05 | HLA-DMA/C   | 4     |
| MF          | GO:0140375 immune recep   | 7/75      | 128/17696 | 1.16E-06 | 2.83E-05 | 2.02E-05 | CD74/HLA-D  | 7     |
| MF          | GO:0023023 MHC protein    | 4/75      | 25/17696  | 3.52E-06 | 7.52E-05 | 5.37E-05 | HLA-DMA/C   | 4     |
| MF          | GO:0042379 chemokine rec  | 5/75      | 66/17696  | 8.73E-06 | 0.000166 | 0.00012  | CXCL11/CXC  | 5     |
| MF          | GO:0045236 CXCR chemo     | 3/75      | 11/17696  | 1.18E-05 | 0.000201 | 0.00014  | CXCL11/CXC  | 3     |
| MF          | GO:0042287 MHC protein    | 4/75      | 40/17696  | 2.42E-05 | 0.000377 | 0.00027  | TAP1/TAP2/C | 4     |
| MF          | GO:0048018 receptor ligan | 10/75     | 482/17696 | 3.48E-05 | 0.000495 | 0.00035  | CXCL11/CXC  | 10    |
| MF          | GO:0030546 signaling rece | 10/75     | 487/17696 | 3.79E-05 | 0.000499 | 0.00036  | CXCL11/CXC  | 10    |
| MF          | GO:0008009 chemokine ac   | 4/75      | 49/17696  | 5.46E-05 | 0.000667 | 0.00048  | CXCL11/CXC  | 4     |
| MF          | GO:0001664 G protein-cou  | 7/75      | 280/17696 | 0.000183 | 0.002081 | 0.00149  | RTP4/CXCL1  | 7     |
| MF          | GO:0005125 cytokine activ | 6/75      | 220/17696 | 0.00034  | 0.003633 | 0.00259  | CXCL11/CXC  | 6     |
| MF          | GO:0042056 chemoattracta  | 3/75      | 38/17696  | 0.000554 | 0.005577 | 0.00398  | CXCL10/CCI  | 3     |
| MF          | GO:0005126 cytokine rece  | 6/75      | 286/17696 | 0.001338 | 0.012715 | 0.00908  | CXCL11/CXC  | 6     |
| MF          | GO:0097153 cysteine-type  | 2/75      | 15/17696  | 0.001796 | 0.016161 | 0.01154  | CASP1/CASF  | 2     |
| MF          | GO:0004175 endopeptidase  | 7/75      | 427/17696 | 0.002194 | 0.018761 | 0.0134   | PSMB8/PSM   | 7     |
| MF          | GO:0042288 MHC class I    | 2/75      | 20/17696  | 0.003205 | 0.026099 | 0.01864  | TAP1/TAP2   | 2     |
| MF          | GO:0004298 threonine-type | 2/75      | 21/17696  | 0.003533 | 0.026266 | 0.01876  | PSMB8/PSM   | 2     |
| MF          | GO:0070003 threonine-type | 2/75      | 21/17696  | 0.003533 | 0.026266 | 0.01876  | PSMB8/PSM   | 2     |
| MF          | GO:0030247 polysaccharid  | 2/75      | 25/17696  | 0.004992 | 0.035568 | 0.0254   | HLA-DRB1/F  | 2     |
| MF          | GO:0008201 heparin bindir | 4/75      | 169/17696 | 0.005764 | 0.039428 | 0.02815  | CXCL11/CXC  | 4     |

# Supplementary Table S10

| ID       | Description                                     | GeneRatio | BgRatio  | pvalue    | p.adjust  | qvalue   | geneID     | Count |
|----------|-------------------------------------------------|-----------|----------|-----------|-----------|----------|------------|-------|
| hsa04612 | Antigen processing and presentation             | 16/55     | 78/8081  | 2.47E-20  | 2.35E-18  | 1.22E-18 | TAP1/HLA-I | 16    |
| hsa05330 | Allograft rejection                             | 13/55     | 38/8081  | 6.98E-20  | 3.32E-18  | 1.73E-18 | HLA-F/HLA  | 13    |
| hsa05332 | Graft-versus-host disease                       | 13/55     | 42/8081  | 3.23E-19  | 1.02E-17  | 5.32E-18 | HLA-F/HLA  | 13    |
| hsa04940 | Type I diabetes mellitus                        | 13/55     | 43/8081  | 4.60E-19  | 1.09E-17  | 5.69E-18 | HLA-F/HLA  | 13    |
| hsa05169 | Epstein-Barr virus infection                    | 20/55     | 202/8081 | 8.28E-19  | 1.57E-17  | 8.20E-18 | TAP1/HLA-I | 20    |
| hsa05320 | Autoimmune thyroid disease                      | 13/55     | 53/8081  | 1.01E-17  | 1.60E-16  | 8.32E-17 | HLA-F/HLA  | 13    |
| hsa05416 | Viral myocarditis                               | 12/55     | 60/8081  | 3.02E-15  | 4.09E-14  | 2.13E-14 | HLA-F/HLA  | 12    |
| hsa05164 | Influenza A                                     | 15/55     | 171/8081 | 2.35E-13  | 2.79E-12  | 1.45E-12 | HLA-DMA/C  | 15    |
| hsa04145 | Phagosome                                       | 14/55     | 152/8081 | 8.51E-13  | 8.99E-12  | 4.68E-12 | TAP1/HLA-I | 14    |
| hsa05166 | Human T-cell leukemia virus type 1 infection    | 15/55     | 219/8081 | 8.83E-12  | 8.39E-11  | 4.37E-11 | HLA-F/HLA  | 15    |
| hsa05321 | Inflammatory bowel disease                      | 10/55     | 65/8081  | 1.22E-11  | 9.93E-11  | 5.17E-11 | HLA-DMA/C  | 10    |
| hsa04514 | Cell adhesion molecules                         | 13/55     | 149/8081 | 1.25E-11  | 9.93E-11  | 5.17E-11 | HLA-F/HLA  | 13    |
| hsa04658 | Th1 and Th2 cell differentiation                | 11/55     | 92/8081  | 1.79E-11  | 1.29E-10  | 6.70E-11 | HLA-DMA/C  | 11    |
| hsa05310 | Asthma                                          | 8/55      | 31/8081  | 1.90E-11  | 1.29E-10  | 6.70E-11 | HLA-DMA/I  | 8     |
| hsa05168 | Herpes simplex virus 1 infection                | 20/55     | 498/8081 | 2.87E-11  | 1.82E-10  | 9.46E-11 | TAP1/HLA-I | 20    |
| hsa04659 | Th17 cell differentiation                       | 11/55     | 107/8081 | 9.58E-11  | 5.69E-10  | 2.96E-10 | HLA-DMA/C  | 11    |
| hsa05150 | Staphylococcus aureus infection                 | 10/55     | 96/8081  | 6.54E-10  | 3.65E-09  | 1.90E-09 | HLA-DMA/I  | 10    |
| hsa04640 | Hematopoietic cell lineage                      | 10/55     | 99/8081  | 8.90E-10  | 4.69E-09  | 2.44E-09 | HLA-DMA/I  | 10    |
| hsa04672 | Intestinal immune network                       | 8/55      | 49/8081  | 9.87E-10  | 4.94E-09  | 2.57E-09 | HLA-DMA/I  | 8     |
| hsa05140 | Leishmaniasis                                   | 9/55      | 77/8081  | 1.79E-09  | 8.51E-09  | 4.43E-09 | HLA-DMA/C  | 9     |
| hsa05145 | Toxoplasmosis                                   | 10/55     | 112/8081 | 3.02E-09  | 1.37E-08  | 7.12E-09 | HLA-DMA/C  | 10    |
| hsa05323 | Rheumatoid arthritis                            | 9/55      | 93/8081  | 9.84E-09  | 4.25E-08  | 2.21E-08 | HLA-DMA/I  | 9     |
| hsa05152 | Tuberculosis                                    | 10/55     | 180/8081 | 2.88E-07  | 1.19E-06  | 6.19E-07 | HLA-DMA/C  | 10    |
| hsa04621 | NOD-like receptor signaling pathway             | 9/55      | 181/8081 | 3.04E-06  | 1.20E-05  | 6.27E-06 | GBP4/GBP1  | 9     |
| hsa05322 | Systemic lupus erythematosus                    | 8/55      | 136/8081 | 3.28E-06  | 1.24E-05  | 6.48E-06 | HLA-DMA/I  | 8     |
| hsa05170 | Human immunodeficiency virus infection          | 9/55      | 212/8081 | 1.11E-05  | 4.05E-05  | 2.11E-05 | TAP1/HLA-I | 9     |
| hsa04061 | Viral protein interaction                       | 6/55      | 100/8081 | 5.48E-05  | 0.0001929 | 0.0001   | CXCL11/CX  | 6     |
| hsa05165 | Human papillomavirus infection                  | 10/55     | 331/8081 | 6.55E-05  | 0.0002224 | 0.000116 | IRF1/HLA-F | 10    |
| hsa05340 | Primary immunodeficiency                        | 4/55      | 38/8081  | 0.0001194 | 0.0003911 | 0.000204 | TAP1/TAP2  | 4     |
| hsa05163 | Human cytomegalovirus infection                 | 8/55      | 225/8081 | 0.0001256 | 0.0003977 | 0.000207 | TAP1/HLA-I | 8     |
| hsa04620 | Toll-like receptor signaling pathway            | 5/55      | 104/8081 | 0.0006692 | 0.0020508 | 0.001068 | CXCL11/CX  | 5     |
| hsa04623 | Cytosolic DNA-sensing                           | 4/55      | 63/8081  | 0.0008495 | 0.002522  | 0.001313 | AIM2/CASP  | 4     |
| hsa04650 | Natural killer cell mediated cytotoxicity       | 5/55      | 131/8081 | 0.001885  | 0.0054265 | 0.002826 | HLA-A/HLA  | 5     |
| hsa05162 | Measles                                         | 5/55      | 139/8081 | 0.0024442 | 0.0068295 | 0.003557 | OAS2/STAT  | 5     |
| hsa05171 | Coronavirus disease - COVID-19                  | 6/55      | 232/8081 | 0.0046964 | 0.0127474 | 0.006639 | OAS2/CASP  | 6     |
| hsa04062 | Chemokine signaling pathway                     | 5/55      | 192/8081 | 0.00956   | 0.0250703 | 0.013056 | CXCL11/CX  | 5     |
| hsa05167 | Kaposi sarcoma-associated herpesvirus infection | 5/55      | 193/8081 | 0.0097642 | 0.0250703 | 0.013056 | HLA-F/HLA  | 5     |
| hsa04060 | Cytokine-cytokine receptor interaction          | 6/55      | 295/8081 | 0.0145206 | 0.0363015 | 0.018905 | CXCL11/CX  | 6     |

# Supplementary Table S11

## HIGH-ETV7

| NAME      | GS<br>follo GS DETA    | SIZE | ES      | NES     | NOM p- | FDR q-val | FWER p-v | RANK A | LEADING EDGI      |
|-----------|------------------------|------|---------|---------|--------|-----------|----------|--------|-------------------|
| GO_HEART  | GO_HEART_Details ...   | 33   | -0.6801 | -2.1359 | 0      | 0.095677  | 0.061    | 8882   | tags=52%, list=1. |
| GO_POSIT  | GO_POSITV_Details ...  | 38   | -0.6171 | -2.1261 | 0      | 0.058888  | 0.072    | 12788  | tags=53%, list=2. |
| GO_SMOO   | GO_SMOOT_Details ...   | 24   | -0.746  | -2.0563 | 0      | 0.14334   | 0.173    | 7471   | tags=58%, list=1. |
| GO_CARDI  | GO_CARDI/_Details ...  | 73   | -0.5774 | -2.0543 | 0      | 0.111961  | 0.175    | 9208   | tags=47%, list=1. |
| GO_CARDI  | GO_CARDI/_Details ...  | 127  | -0.5299 | -2.0539 | 0      | 0.089712  | 0.175    | 12749  | tags=48%, list=2. |
| GO_VENTR  | GO_VENTR/_Details ...  | 72   | -0.5606 | -1.9996 | 0      | 0.170851  | 0.301    | 12749  | tags=50%, list=2. |
| GO_AORTA  | GO_AORTA_Details ...   | 35   | -0.6539 | -1.9865 | 0      | 0.181701  | 0.345    | 8882   | tags=49%, list=1. |
| GO_VENTR  | GO_VENTR/_Details ...  | 16   | -0.7194 | -1.9807 | 0      | 0.171366  | 0.36     | 8882   | tags=50%, list=1. |
| GO_CARDI  | GO_CARDI/_Details ...  | 127  | -0.5187 | -1.9764 | 0      | 0.162129  | 0.371    | 12788  | tags=48%, list=2. |
| GO_ENDOC  | GO_ENDOC_Details ...   | 45   | -0.641  | -1.9692 | 0      | 0.160401  | 0.388    | 13311  | tags=62%, list=2. |
| GO_REGUL  | GO_REGUL_Details ...   | 34   | -0.6043 | -1.965  | 0      | 0.154823  | 0.401    | 7643   | tags=47%, list=1. |
| GO_POSIT  | GO_POSITV_Details ...  | 52   | -0.5502 | -1.9555 | 0      | 0.161212  | 0.432    | 12950  | tags=48%, list=2. |
| GO_CARDI  | GO_CARDI/_Details ...  | 74   | -0.5518 | -1.9406 | 0      | 0.179121  | 0.473    | 15844  | tags=58%, list=2. |
| GO_CARDI  | GO_CARDI/_Details ...  | 169  | -0.4954 | -1.9205 | 0      | 0.1993    | 0.53     | 12788  | tags=45%, list=2. |
| GO_VENTR  | GO_VENTR/_Details ...  | 43   | -0.583  | -1.9154 | 0      | 0.186481  | 0.545    | 12664  | tags=53%, list=2. |
| GO_POSIT  | GO_POSITV_Details ...  | 61   | -0.5145 | -1.9056 | 0      | 0.200393  | 0.579    | 6716   | tags=34%, list=1. |
| GO_SYNAP  | GO_SYNAP_Details ...   | 16   | -0.7738 | -1.9001 | 0      | 0.193154  | 0.589    | 9188   | tags=75%, list=1. |
| GO_STERO  | GO_STEROI_Details ...  | 20   | -0.6676 | -1.8815 | 0      | 0.227893  | 0.637    | 8941   | tags=40%, list=1. |
| GO_CARDI  | GO_CARDI/_Details ...  | 110  | -0.5122 | -1.875  | 0      | 0.23483   | 0.655    | 12788  | tags=45%, list=2. |
| GO_ENDOC  | GO_ENDOC_Details ...   | 35   | -0.6373 | -1.8728 | 0      | 0.229994  | 0.657    | 13311  | tags=60%, list=2. |
| GO_GAMM   | GO_GAMM/_Details ...   | 26   | -0.6494 | -1.8661 | 0      | 0.219056  | 0.666    | 12500  | tags=65%, list=2. |
| GO_VENTR  | GO_VENTR/_Details ...  | 55   | -0.531  | -1.8652 | 0      | 0.212414  | 0.667    | 9208   | tags=42%, list=1. |
| GO_MESEN  | GO_MESEN_Details ...   | 52   | -0.6044 | -1.8577 | 0      | 0.215545  | 0.685    | 13311  | tags=62%, list=2. |
| GO_TRABE  | GO_TRABE/_Details ...  | 48   | -0.55   | -1.8515 | 0      | 0.208678  | 0.697    | 8882   | tags=46%, list=1. |
| GO_LATER  | GO_LATER/_Details ...  | 15   | -0.6554 | -1.8474 | 0      | 0.194019  | 0.705    | 1087   | tags=40%, list=2. |
| GO_CARDI  | GO_CARDI/_Details ...  | 20   | -0.6248 | -1.8417 | 0      | 0.201133  | 0.718    | 8882   | tags=50%, list=1. |
| GO_ORGAN  | GO_ORGAN_INDUCT        | 24   | -0.6365 | -1.835  | 0      | 0.194407  | 0.74     | 11983  | tags=54%, list=2. |
| GO_FIBRO  | GO_FIBROBLAST_GR       | 115  | -0.4726 | -1.8308 | 0      | 0.193739  | 0.748    | 9127   | tags=37%, list=1. |
| GO_CELL_  | GO_CELL_SURFACE_       | 33   | -0.5979 | -1.8272 | 0      | 0.192085  | 0.757    | 11983  | tags=48%, list=2. |
| GO_HINDB  | GO_HINDBRAIN_MOI       | 42   | -0.5574 | -1.7899 | 0      | 0.233857  | 0.83     | 11744  | tags=50%, list=2. |
| GO_HEART  | GO_HEART_MORPHC        | 252  | -0.4438 | -1.7673 | 0      | 0.228275  | 0.866    | 12817  | tags=42%, list=2. |
| GO_SPECIF | GO_SPECIFICATION_      | 133  | -0.4334 | -1.7112 | 0      | 0.268296  | 0.935    | 15533  | tags=46%, list=2. |
| GO_REGUL  | GO_REGULATION_OF       | 77   | -0.5009 | -1.7546 | 0.0019 | 0.246566  | 0.877    | 8997   | tags=38%, list=1. |
| GO_RESPO  | GO_RESPONSE_TO_F       | 150  | -0.4152 | -1.6615 | 0.0019 | 0.296147  | 0.97     | 9127   | tags=33%, list=1. |
| GO_SULFU  | GO_SULFUI_Details ...  | 15   | -0.678  | -1.836  | 0.0019 | 0.19727   | 0.738    | 7021   | tags=40%, list=1. |
| GO_CONVE  | GO_CONVE_Details ...   | 15   | -0.6675 | -1.8392 | 0.002  | 0.195507  | 0.725    | 11983  | tags=53%, list=2. |
| GO_PDZ_D  | GO_PDZ_DOMAIN_BI       | 82   | -0.4908 | -1.7985 | 0.002  | 0.227175  | 0.809    | 10885  | tags=46%, list=1. |
| GO_ENDOC  | GO_ENDOCRINE_HOI       | 45   | -0.4919 | -1.6933 | 0.002  | 0.285436  | 0.951    | 14012  | tags=42%, list=2. |
| GO_DIGEST | GO_DIGESTIVE_TRA       | 49   | -0.5509 | -1.8286 | 0.002  | 0.193367  | 0.752    | 12111  | tags=51%, list=2. |
| GO_REGUL  | GO_REGUL_Details ...   | 57   | -0.5184 | -1.8551 | 0.002  | 0.207934  | 0.692    | 8230   | tags=39%, list=1. |
| GO_NEGAT  | GO_NEGAT_Details ...   | 19   | -0.6637 | -1.8695 | 0.002  | 0.220189  | 0.66     | 4615   | tags=42%, list=8. |
| GO_ANIMA  | GO_ANIMAL_ORGAN        | 65   | -0.4933 | -1.7686 | 0.002  | 0.235579  | 0.863    | 11983  | tags=48%, list=2. |
| GO_SPECIF | GO_SPECIF/_Details ... | 36   | -0.5854 | -1.8712 | 0.002  | 0.224902  | 0.658    | 11983  | tags=50%, list=2. |
| GO_ATRIO  | GO_ATRIOVENTRICU       | 25   | -0.6272 | -1.8127 | 0.002  | 0.214023  | 0.787    | 12664  | tags=64%, list=2. |
| GO_REGUL  | GO_REGULATION_OF       | 93   | -0.4876 | -1.7216 | 0.002  | 0.265799  | 0.925    | 10004  | tags=43%, list=1. |
| GO_CARDI  | GO_CARDIAC_MUSC        | 63   | -0.4897 | -1.7424 | 0.0021 | 0.266048  | 0.898    | 12664  | tags=46%, list=2. |
| GO_AORTA  | GO_AORTA_DEVELO        | 60   | -0.5397 | -1.7382 | 0.0021 | 0.2561    | 0.904    | 8882   | tags=40%, list=1. |
| GO_ARTER  | GO_ARTER/_Details ...  | 74   | -0.5366 | -1.8489 | 0.0021 | 0.201336  | 0.702    | 15325  | tags=51%, list=2. |
| GO_REGUL  | GO_REGUL_Details ...   | 38   | -0.5885 | -1.8478 | 0.0021 | 0.198626  | 0.703    | 11983  | tags=50%, list=2. |
| GO_ENDOC  | GO_ENDOC_Details ...   | 24   | -0.6882 | -1.8411 | 0.0021 | 0.196917  | 0.719    | 8882   | tags=54%, list=1. |
| GO_DENDR  | GO_DENDRITE_MEM        | 43   | -0.5942 | -1.7789 | 0.0021 | 0.227658  | 0.846    | 12500  | tags=65%, list=2. |
| GO_HEART  | GO_HEART_FORMAT        | 31   | -0.5588 | -1.7687 | 0.0021 | 0.238845  | 0.863    | 11983  | tags=52%, list=2. |
| GO_GABA_  | GO_GABA_/Details ...   | 22   | -0.7053 | -1.9017 | 0.0021 | 0.199603  | 0.587    | 12825  | tags=73%, list=2. |
| GO_GABA_  | GO_GABA_/Details ...   | 20   | -0.7341 | -1.9375 | 0.0022 | 0.171831  | 0.477    | 12825  | tags=80%, list=2. |
| GO_WNT_A  | GO_WNT_A_Details ...   | 15   | -0.7217 | -1.9173 | 0.0022 | 0.193319  | 0.54     | 12292  | tags=73%, list=2. |
| GO_POSIT  | GO_POSITIVE_REGUI      | 74   | -0.4924 | -1.7391 | 0.0038 | 0.257303  | 0.904    | 9553   | tags=38%, list=1. |
| GO_REGUL  | GO_REGULATION_OF       | 153  | -0.4506 | -1.6888 | 0.0039 | 0.2862    | 0.953    | 10004  | tags=38%, list=1. |



|           |                       |     |         |         |        |          |       |       |                   |
|-----------|-----------------------|-----|---------|---------|--------|----------|-------|-------|-------------------|
| GO_MODUL  | GO_MODULATION_O       | 45  | -0.591  | -1.8327 | 0.0039 | 0.194695 | 0.743 | 8229  | tags=49%, list=1. |
| GO_CARDI  | GO_CARDIAC_MUSC       | 228 | -0.4207 | -1.6979 | 0.0039 | 0.282111 | 0.946 | 12976 | tags=41%, list=2  |
| GO_DIGEST | GO_DIGESTIVE_SYS      | 145 | -0.4284 | -1.6318 | 0.004  | 0.312793 | 0.983 | 12111 | tags=37%, list=2  |
| GO_REGUL  | GO_REGULATION_OI      | 64  | -0.45   | -1.6374 | 0.0041 | 0.319673 | 0.981 | 15082 | tags=50%, list=2  |
| GO_ROOF   | GO_ROOF_OF_MOUT       | 90  | -0.49   | -1.7858 | 0.0041 | 0.234935 | 0.835 | 14543 | tags=49%, list=2  |
| GO_OUTFL  | GO_OUTFLOW_TRAC       | 80  | -0.5121 | -1.7826 | 0.0041 | 0.234632 | 0.841 | 16390 | tags=58%, list=2  |
| GO_DENDR  | GO_DENDR Details ...  | 15  | -0.6735 | -1.8651 | 0.0041 | 0.205078 | 0.668 | 12388 | tags=73%, list=2  |
| GO_COCHL  | GO_COCHLEA_DEVE       | 51  | -0.5053 | -1.7684 | 0.0041 | 0.23248  | 0.863 | 11028 | tags=43%, list=1' |
| GO_CGMP   | GO_CGMP_METABOI       | 15  | -0.6779 | -1.7508 | 0.0042 | 0.252474 | 0.88  | 2051  | tags=47%, list=4  |
| GO_AXIS_E | GO_AXIS_ELONGATI      | 30  | -0.6015 | -1.7882 | 0.0042 | 0.233735 | 0.832 | 11983 | tags=50%, list=2  |
| GO_CALCII | GO_CALCIUM_DEPEI      | 43  | -0.5852 | -1.8064 | 0.0043 | 0.214348 | 0.799 | 4441  | tags=40%, list=8  |
| GO_REGUL  | GO_REGULATION_OI      | 29  | -0.5145 | -1.6349 | 0.0043 | 0.317368 | 0.982 | 20825 | tags=69%, list=3  |
| GO TRABE  | GO TRABECULA_FOI      | 25  | -0.6007 | -1.7683 | 0.0043 | 0.22932  | 0.863 | 8882  | tags=48%, list=1. |
| GO_NEGAT  | GO_NEGATIVE_REGU      | 15  | -0.642  | -1.7424 | 0.0057 | 0.262619 | 0.898 | 15514 | tags=60%, list=2  |
| GO_NEGAT  | GO_NEGATIVE_REGU      | 48  | -0.493  | -1.7408 | 0.0058 | 0.256503 | 0.9   | 3722  | tags=33%, list=6  |
| GO_NEGAT  | GO_NEGATIVE_REGU      | 34  | -0.5648 | -1.8268 | 0.0059 | 0.188771 | 0.757 | 8229  | tags=44%, list=1. |
| GO_CARDI  | GO_CARDIAC_ATRIU      | 34  | -0.5342 | -1.7324 | 0.0059 | 0.260933 | 0.915 | 17220 | tags=56%, list=2  |
| GO_HEART  | GO_HEART_VALVE_I      | 60  | -0.565  | -1.8074 | 0.0059 | 0.220867 | 0.798 | 11808 | tags=58%, list=2  |
| GO_NEPHR  | GO_NEPHRIC_DUCT_      | 16  | -0.6321 | -1.7956 | 0.0059 | 0.229161 | 0.813 | 15942 | tags=75%, list=2  |
| GO_AXIS_S | GO_AXIS_SPECIFICA     | 87  | -0.4587 | -1.7176 | 0.006  | 0.266782 | 0.928 | 14390 | tags=49%, list=2  |
| GO_ATRIAI | GO_ATRIAL_SEPTUM      | 21  | -0.5714 | -1.701  | 0.006  | 0.276907 | 0.943 | 15184 | tags=57%, list=2  |
| GO_CORTIC | GO_CORTIC Details ... | 15  | -0.6926 | -1.8569 | 0.006  | 0.210484 | 0.686 | 7396  | tags=40%, list=1. |
| GO_NEGAT  | GO_NEGATIVE_REGU      | 45  | -0.4973 | -1.7414 | 0.006  | 0.258239 | 0.9   | 8426  | tags=36%, list=1. |
| GO_CARDI  | GO_CARDIAC_MUSC       | 67  | -0.4841 | -1.7943 | 0.006  | 0.227776 | 0.815 | 11823 | tags=40%, list=2  |
| GO_CALCII | GO_CALCIUM_ION_T      | 17  | -0.619  | -1.76   | 0.0061 | 0.241507 | 0.874 | 11495 | tags=35%, list=2  |
| GO_REGUL  | GO_REGULATION_OI      | 17  | -0.6018 | -1.7304 | 0.0061 | 0.262749 | 0.916 | 6841  | tags=35%, list=1. |
| GO_OUTFL  | GO_OUTFL Details ...  | 27  | -0.6291 | -1.8508 | 0.0061 | 0.203708 | 0.697 | 15844 | tags=70%, list=2  |
| GO_PARAX  | GO_PARAXIAL_MESC      | 18  | -0.6327 | -1.781  | 0.0062 | 0.23079  | 0.845 | 11983 | tags=72%, list=2  |
| GO_EMBRY  | GO_EMBRYONIC_AP       | 123 | -0.4707 | -1.6815 | 0.0062 | 0.284407 | 0.958 | 8585  | tags=39%, list=1. |
| GO_CELLU  | GO_CELLULAR_RESF      | 21  | -0.6027 | -1.7701 | 0.0062 | 0.239303 | 0.86  | 806   | tags=24%, list=1' |
| GO_NEGAT  | GO_NEGATIVE_REGU      | 15  | -0.6051 | -1.677  | 0.0063 | 0.279086 | 0.961 | 8230  | tags=40%, list=1. |
| GO_HOMOI  | GO_HOMOPHILIC_CE      | 164 | -0.5014 | -1.8074 | 0.0064 | 0.216451 | 0.798 | 12572 | tags=48%, list=2  |
| GO_WNT_P  | GO_WNT_PROTEIN_F      | 30  | -0.6261 | -1.7821 | 0.0064 | 0.232098 | 0.843 | 12292 | tags=63%, list=2  |
| GO_TRACH  | GO_TRACHEA_DEVE       | 19  | -0.6283 | -1.757  | 0.0075 | 0.244656 | 0.875 | 6505  | tags=53%, list=1  |
| GO_REGUL  | GO_REGULATION_OI      | 86  | -0.4491 | -1.7228 | 0.0076 | 0.265901 | 0.925 | 12950 | tags=40%, list=2  |
| GO_DOPAM  | GO_DOPAMINERGIC_      | 36  | -0.5597 | -1.7847 | 0.0076 | 0.233731 | 0.838 | 13955 | tags=58%, list=2  |
| GO_DENDR  | GO_DENDRITE_MORI      | 143 | -0.4489 | -1.6505 | 0.0079 | 0.308306 | 0.976 | 10004 | tags=38%, list=1' |
| GO_REGUL  | GO_REGULATION_OI      | 24  | -0.5207 | -1.6918 | 0.0079 | 0.283822 | 0.952 | 6841  | tags=29%, list=1. |
| GO_REGUL  | GO_REGULATION_OI      | 32  | -0.5006 | -1.6573 | 0.008  | 0.302435 | 0.973 | 7654  | tags=31%, list=1. |
| GO_MESEN  | GO_MESENCHYME_I       | 286 | -0.416  | -1.6368 | 0.008  | 0.31719  | 0.981 | 11983 | tags=42%, list=2  |
| GO_HEART  | GO_HEART_FIELD_SI     | 17  | -0.6184 | -1.7415 | 0.0082 | 0.261318 | 0.899 | 11983 | tags=59%, list=2  |
| GO_CGMP   | GO_CGMP_MEDIATE       | 27  | -0.5741 | -1.7216 | 0.0083 | 0.263013 | 0.925 | 4174  | tags=44%, list=7  |
| GO_CORON  | GO_CORONARY_VAS       | 17  | -0.64   | -1.721  | 0.0084 | 0.261434 | 0.925 | 8882  | tags=53%, list=1. |
| GO_REGUL  | GO_REGULATION_OI      | 41  | -0.518  | -1.7116 | 0.0085 | 0.270248 | 0.935 | 12788 | tags=44%, list=2  |
| GO_HEART  | GO_HEART_GROWTH       | 112 | -0.4297 | -1.6774 | 0.0095 | 0.2849   | 0.961 | 12950 | tags=39%, list=2  |
| GO_UROGE  | GO_UROGENITAL_SY      | 328 | -0.399  | -1.6481 | 0.0096 | 0.311945 | 0.977 | 8254  | tags=30%, list=1. |
| GO_EMBRY  | GO_EMBRYONIC_DIC      | 57  | -0.4844 | -1.7029 | 0.0097 | 0.277421 | 0.941 | 17220 | tags=54%, list=2  |
| GO_POSITI | GO_POSITIVE_REGUI     | 63  | -0.449  | -1.6343 | 0.0098 | 0.316807 | 0.982 | 13702 | tags=46%, list=2  |
| GO_POSITI | GO_POSITIVE_REGUI     | 25  | -0.5377 | -1.7121 | 0.0098 | 0.274478 | 0.934 | 7790  | tags=44%, list=1. |
| GO_POSITI | GO_POSITIVE_REGUI     | 38  | -0.5358 | -1.7481 | 0.0098 | 0.255694 | 0.887 | 8876  | tags=39%, list=1. |
| GO_POSITI | GO_POSITIVE_REGUI     | 27  | -0.5235 | -1.6748 | 0.0098 | 0.277639 | 0.963 | 16249 | tags=52%, list=2  |
| GO_REGUL  | GO_REGULATION_OI      | 44  | -0.4834 | -1.5901 | 0.01   | 0.360667 | 0.993 | 15424 | tags=45%, list=2  |
| GO_DEVEL  | GO_DEVELOPMENTA       | 36  | -0.5199 | -1.6888 | 0.0101 | 0.283722 | 0.953 | 11983 | tags=47%, list=2  |
| GO_NEURC  | GO_NEURON_PROJEC      | 59  | -0.5371 | -1.664  | 0.0101 | 0.292454 | 0.97  | 13008 | tags=58%, list=2  |
| GO_ARTER  | GO_ARTERY_DEVEL       | 101 | -0.479  | -1.7058 | 0.0101 | 0.275843 | 0.939 | 10490 | tags=38%, list=1  |
| GO_SODIU  | GO_SODIUM_ION_TR      | 174 | -0.3677 | -1.5024 | 0.0101 | 0.374713 | 0.999 | 11031 | tags=33%, list=1' |
| GO_POSITI | GO_POSITIVE_REGUI     | 17  | -0.6051 | -1.7245 | 0.0102 | 0.264603 | 0.922 | 4975  | tags=47%, list=9  |
| GO_CARDI  | GO_CARDIAC_ATRIU      | 28  | -0.5579 | -1.7025 | 0.0102 | 0.275639 | 0.941 | 17220 | tags=61%, list=2  |

|           |                   |     |         |         |        |          |       |       |                   |
|-----------|-------------------|-----|---------|---------|--------|----------|-------|-------|-------------------|
| GO_MATIN  | GO_MATING_BEHAV   | 23  | -0.5307 | -1.6938 | 0.0102 | 0.287106 | 0.951 | 7870  | tags=35%, list=1  |
| GO_FACE_I | GO_FACE_DEVELOP   | 48  | -0.5156 | -1.7121 | 0.0102 | 0.271734 | 0.934 | 10943 | tags=46%, list=1' |
| GO_SYMPA  | GO_SYMPATHETIC_N  | 21  | -0.6084 | -1.6771 | 0.0103 | 0.281119 | 0.961 | 7998  | tags=52%, list=1. |
| GO_REGUL  | GO_REGULATION_OI  | 115 | -0.4143 | -1.6335 | 0.0115 | 0.316891 | 0.982 | 13702 | tags=42%, list=2  |
| GO_POSITI | GO_POSITIVE_REGUI | 83  | -0.4408 | -1.6527 | 0.0116 | 0.307354 | 0.975 | 12950 | tags=41%, list=2  |
| GO_RESPIR | GO_RESPIRATORY_S  | 201 | -0.4137 | -1.5958 | 0.0117 | 0.357493 | 0.992 | 10951 | tags=36%, list=1' |
| GO_RETIN  | GO_RETINA_DEVELC  | 147 | -0.4471 | -1.6772 | 0.0118 | 0.283072 | 0.961 | 15415 | tags=49%, list=2  |
| GO_HEAD_  | GO_HEAD_MORPHOC   | 36  | -0.5434 | -1.7174 | 0.0118 | 0.264449 | 0.928 | 17220 | tags=61%, list=2' |
| GO_REGUL  | GO_REGULATION_OI  | 101 | -0.436  | -1.6758 | 0.0119 | 0.277536 | 0.961 | 12950 | tags=40%, list=2  |
| GO_RESPIR | GO_RESPIRATORY_S  | 32  | -0.5173 | -1.6209 | 0.0119 | 0.324505 | 0.985 | 16720 | tags=69%, list=2' |
| GO_BETA_  | GO_BETA_CATENIN_  | 84  | -0.503  | -1.7806 | 0.012  | 0.227891 | 0.845 | 8878  | tags=38%, list=1. |
| GO_PHOSPI | GO_PHOSPHATASE_I  | 45  | -0.4349 | -1.5872 | 0.0121 | 0.362569 | 0.993 | 12823 | tags=47%, list=2  |
| GO_NEURC  | GO_NEUROMUSCUL    | 76  | -0.4719 | -1.6335 | 0.0121 | 0.314964 | 0.982 | 10655 | tags=46%, list=1. |
| GO_EMBRY  | GO_EMBRYONIC_PL   | 24  | -0.5259 | -1.6382 | 0.0123 | 0.319739 | 0.98  | 10234 | tags=50%, list=1  |
| GO_MUSCL  | GO_MUSCLE_ORGAN   | 83  | -0.4621 | -1.6764 | 0.0125 | 0.278386 | 0.961 | 10943 | tags=42%, list=1' |
| GO_CELL_  | GO_CELL_MIGRATIO  | 18  | -0.6241 | -1.7377 | 0.0126 | 0.254365 | 0.905 | 15503 | tags=56%, list=2  |
| GO_POSTS' | GO_POSTSYNAPTIC_  | 116 | -0.4878 | -1.5721 | 0.0127 | 0.372215 | 0.993 | 15009 | tags=54%, list=2  |
| GO_POSITI | GO_POSITIVE_REGUI | 43  | -0.5075 | -1.6301 | 0.0135 | 0.313147 | 0.983 | 8907  | tags=37%, list=1. |
| GO_POSITI | GO_POSITIVE_REGUI | 108 | -0.3967 | -1.5495 | 0.0136 | 0.37951  | 0.995 | 15514 | tags=46%, list=2  |
| GO_REGUL  | GO_REGULATION_OI  | 44  | -0.4935 | -1.63   | 0.0136 | 0.311661 | 0.983 | 12067 | tags=41%, list=2  |
| GO_NEGAT  | GO_NEGATIVE_REGU  | 27  | -0.5322 | -1.6928 | 0.0137 | 0.283929 | 0.952 | 8229  | tags=37%, list=1. |
| GO_EMBRY  | GO_EMBRYONIC_FO   | 32  | -0.5161 | -1.6364 | 0.0138 | 0.316016 | 0.981 | 8338  | tags=50%, list=1. |
| GO_EMBRY  | GO_EMBRYONIC_DIC  | 18  | -0.6458 | -1.7786 | 0.0139 | 0.224678 | 0.847 | 4739  | tags=44%, list=8  |
| GO_MESEN  | GO_MESENCHYMAL_   | 44  | -0.5281 | -1.7258 | 0.014  | 0.264606 | 0.92  | 10943 | tags=52%, list=1' |
| GO_SMOOT  | GO_SMOOTH_MUSCI   | 68  | -0.4953 | -1.6673 | 0.014  | 0.288944 | 0.969 | 9318  | tags=37%, list=1. |
| GO_REGUL  | GO_REGULATION_OI  | 105 | -0.442  | -1.6184 | 0.0141 | 0.32706  | 0.986 | 11448 | tags=42%, list=2  |
| GO_REGUL  | GO_REGULATION_OI  | 34  | -0.5269 | -1.6194 | 0.0142 | 0.326285 | 0.986 | 7155  | tags=38%, list=1. |
| GO_MORPF  | GO_MORPHOGENESI   | 25  | -0.527  | -1.6398 | 0.0143 | 0.319974 | 0.98  | 18351 | tags=64%, list=3  |
| GO_SODIU  | GO_SODIUM_ION_TR  | 240 | -0.3382 | -1.4221 | 0.0143 | 0.385582 | 1     | 11099 | tags=31%, list=1' |
| GO_POSTS' | GO_POSTSYNAPTIC_  | 275 | -0.4513 | -1.6157 | 0.0143 | 0.328052 | 0.989 | 15009 | tags=52%, list=2  |
| GO_POSTS' | GO_POSTSYNAPTIC_  | 34  | -0.5496 | -1.5925 | 0.0143 | 0.361946 | 0.993 | 6442  | tags=41%, list=1  |
| GO_SYNAP  | GO_SYNAPTIC_TRAN  | 47  | -0.5372 | -1.6836 | 0.0143 | 0.286265 | 0.955 | 12500 | tags=51%, list=2  |
| GO_SPINAL | GO_SPINAL_CORD_D  | 109 | -0.4704 | -1.5881 | 0.0144 | 0.362022 | 0.993 | 17220 | tags=54%, list=2  |
| GO_EMBRY  | GO_EMBRYONIC_HIN  | 29  | -0.5592 | -1.6887 | 0.0144 | 0.281409 | 0.953 | 8585  | tags=52%, list=1. |
| GO_POSTS' | GO_POSTSYNAPTIC_  | 90  | -0.4907 | -1.5833 | 0.0149 | 0.359687 | 0.993 | 13214 | tags=51%, list=2  |
| GO_DENDR  | GO_DENDRITIC_SPIN | 101 | -0.4523 | -1.6152 | 0.0151 | 0.32559  | 0.989 | 10263 | tags=38%, list=1  |
| GO_SODIU  | GO_SODIUM_ION_TR  | 152 | -0.3711 | -1.4906 | 0.0154 | 0.371473 | 0.999 | 16280 | tags=44%, list=2  |
| GO_NEURC  | GO_NEURON_TO_NE   | 358 | -0.4123 | -1.6453 | 0.0156 | 0.312745 | 0.978 | 13214 | tags=43%, list=2  |
| GO_RNAI_  | GO_RNAI_EFFECTOR  | 16  | -0.6902 | -1.6876 | 0.016  | 0.281546 | 0.953 | 4956  | tags=44%, list=8  |
| GO_TRANS  | GO_TRANSMEMBRAL   | 79  | -0.4885 | -1.7035 | 0.0161 | 0.27862  | 0.941 | 13311 | tags=49%, list=2  |
| GO_TRANS  | GO_TRANSMEMBRAL   | 61  | -0.4735 | -1.6231 | 0.0162 | 0.321097 | 0.985 | 13245 | tags=49%, list=2  |
| GO_PERIC  | GO_PERICARDIUM_I  | 20  | -0.5699 | -1.6964 | 0.0162 | 0.283191 | 0.947 | 11652 | tags=65%, list=2  |
| GO_METEN  | GO_METENCEPHALC   | 110 | -0.4563 | -1.6418 | 0.0164 | 0.316966 | 0.98  | 11744 | tags=44%, list=2  |
| GO_CELL_  | GO_CELL_PROLIFER. | 28  | -0.5518 | -1.6101 | 0.0164 | 0.329333 | 0.989 | 15207 | tags=61%, list=2  |
| GO_SECON  | GO_SECONDARY_PA   | 24  | -0.5656 | -1.6561 | 0.0165 | 0.303069 | 0.974 | 12664 | tags=63%, list=2  |
| GO_HINDLI | GO_HINDLIMB_MOR   | 37  | -0.5268 | -1.6328 | 0.0168 | 0.312615 | 0.982 | 8585  | tags=49%, list=1. |
| GO_MIDBR  | GO_MIDBRAIN_DOP   | 17  | -0.6031 | -1.7267 | 0.0174 | 0.265512 | 0.919 | 10943 | tags=53%, list=1' |
| GO_HINDBI | GO_HINDBRAIN_DEV  | 152 | -0.4252 | -1.5774 | 0.0177 | 0.36581  | 0.993 | 12566 | tags=42%, list=2  |
| GO_RESPOI | GO_RESPONSE_TO_P  | 24  | -0.5437 | -1.6811 | 0.0178 | 0.282889 | 0.959 | 3744  | tags=33%, list=6  |
| GO_BODY_  | GO_BODY_MORPHOC   | 49  | -0.5211 | -1.7101 | 0.0178 | 0.268443 | 0.937 | 8248  | tags=39%, list=1. |
| GO_POSITI | GO_POSITIVE_REGUI | 26  | -0.5912 | -1.7369 | 0.0179 | 0.252992 | 0.905 | 9318  | tags=42%, list=1. |
| GO_NEGAT  | GO_NEGATIVE_REGU  | 309 | -0.3924 | -1.563  | 0.0179 | 0.376859 | 0.994 | 8823  | tags=35%, list=1. |
| GO_CLATH  | GO_CLATHRIN_COA   | 71  | -0.4355 | -1.5789 | 0.0179 | 0.365406 | 0.993 | 12509 | tags=51%, list=2  |
| GO_MAINT  | GO_MAINTENANCE_   | 34  | -0.5409 | -1.6776 | 0.018  | 0.286673 | 0.961 | 7372  | tags=41%, list=1. |
| GO_CARDI  | GO_CARDIAC_MUSC   | 124 | -0.3991 | -1.5307 | 0.018  | 0.388098 | 0.996 | 12950 | tags=39%, list=2  |
| GO_VASCU  | GO_VASCULAR_ASS   | 46  | -0.5352 | -1.6904 | 0.0185 | 0.284758 | 0.953 | 9318  | tags=35%, list=1. |
| GO_REGUL  | GO_REGULATION_OI  | 21  | -0.6021 | -1.6791 | 0.0185 | 0.285247 | 0.959 | 3847  | tags=43%, list=7  |
| GO_POSTS' | GO_POSTSYNAPTIC_  | 21  | -0.6394 | -1.633  | 0.0186 | 0.314217 | 0.982 | 6442  | tags=52%, list=1  |

|           |                   |     |         |         |        |          |       |       |                  |
|-----------|-------------------|-----|---------|---------|--------|----------|-------|-------|------------------|
| GO_ORGAN  | GO_ORGAN_GROWTH   | 188 | -0.4021 | -1.6143 | 0.0187 | 0.325959 | 0.989 | 13328 | tags=39%, list=2 |
| GO_PROTEI | GO_PROTEIN_DNA_C  | 18  | -0.6365 | -1.6819 | 0.0191 | 0.285637 | 0.958 | 3233  | tags=39%, list=6 |
| GO_TRANS  | GO_TRANSLATION_F  | 26  | -0.5795 | -1.6824 | 0.0195 | 0.286854 | 0.957 | 5527  | tags=38%, list=9 |
| GO_STEROI | GO_STEROL_BIOSYN  | 79  | -0.4673 | -1.5851 | 0.0197 | 0.364205 | 0.993 | 4065  | tags=23%, list=7 |
| GO_CEREB  | GO_CEREBELLAR_CC  | 31  | -0.5569 | -1.6857 | 0.0198 | 0.283636 | 0.953 | 11744 | tags=52%, list=2 |
| GO_METAN  | GO_METANEPHROS_   | 91  | -0.4628 | -1.6558 | 0.02   | 0.301572 | 0.975 | 9318  | tags=40%, list=1 |
| GO_CYCLIC | GO_CYCLIC_NUCLEC  | 25  | -0.5466 | -1.6435 | 0.0201 | 0.314872 | 0.978 | 3593  | tags=32%, list=6 |
| GO_SOLUT  | GO_SOLUTE_CATION  | 98  | -0.3774 | -1.4726 | 0.0201 | 0.376564 | 0.999 | 16260 | tags=46%, list=2 |
| GO_CARDI  | GO_CARDIOCYTE_DI  | 154 | -0.3988 | -1.5578 | 0.0202 | 0.379201 | 0.995 | 18260 | tags=49%, list=3 |
| GO_NEGAT  | GO_NEGATIVE_REGU  | 73  | -0.4477 | -1.5613 | 0.0203 | 0.378072 | 0.995 | 11596 | tags=41%, list=2 |
| GO_PHOTO  | GO_PHOTORECEPTO   | 16  | -0.6205 | -1.6701 | 0.0214 | 0.28439  | 0.966 | 18221 | tags=63%, list=3 |
| GO_NEGAT  | GO_NEGATIVE_REGU  | 330 | -0.3711 | -1.5224 | 0.0216 | 0.37683  | 0.997 | 8823  | tags=34%, list=1 |
| GO_REGUL  | GO_REGULATION_OI  | 249 | -0.3839 | -1.5608 | 0.0217 | 0.377816 | 0.995 | 13802 | tags=40%, list=2 |
| GO_RESPO  | GO_RESPONSE_TO_B  | 164 | -0.4014 | -1.5542 | 0.0217 | 0.381876 | 0.995 | 14016 | tags=42%, list=2 |
| GO_MESON  | GO_MESONEPHROS_   | 103 | -0.4365 | -1.6385 | 0.0217 | 0.321175 | 0.98  | 8585  | tags=34%, list=1 |
| GO_CELLU  | GO_CELLULAR_RESF  | 26  | -0.5298 | -1.6316 | 0.0222 | 0.311404 | 0.983 | 1071  | tags=23%, list=2 |
| GO_NEURC  | GO_NEUROTRANSMI   | 19  | -0.5524 | -1.5846 | 0.0223 | 0.361706 | 0.993 | 17190 | tags=68%, list=2 |
| GO_SECRE  | GO_SECRETORY_GR.  | 15  | -0.6648 | -1.6288 | 0.0224 | 0.312399 | 0.983 | 5721  | tags=47%, list=1 |
| GO_CELL_I | GO_CELL_BODY_ME   | 31  | -0.5585 | -1.6079 | 0.0226 | 0.332873 | 0.99  | 14731 | tags=68%, list=2 |
| GO_SPINAL | GO_SPINAL_CORD_P  | 24  | -0.5745 | -1.5807 | 0.0226 | 0.362632 | 0.993 | 16549 | tags=63%, list=2 |
| GO_REGUL  | GO_REGULATION_OI  | 47  | -0.5132 | -1.6746 | 0.0227 | 0.276026 | 0.963 | 9869  | tags=40%, list=1 |
| GO_CAMEF  | GO_CAMERA_TYPE_   | 329 | -0.3625 | -1.4993 | 0.0228 | 0.368564 | 0.999 | 15683 | tags=43%, list=2 |
| GO_EPITHE | GO_EPITHELIAL_TUF | 132 | -0.413  | -1.5783 | 0.0228 | 0.365246 | 0.993 | 10943 | tags=39%, list=1 |
| GO_EMBRY  | GO_EMBRYONIC_PA'  | 69  | -0.426  | -1.5847 | 0.023  | 0.363291 | 0.993 | 12828 | tags=43%, list=2 |
| GO_POSIT  | GO_POSITIVE_REGUI | 48  | -0.454  | -1.5844 | 0.0236 | 0.360437 | 0.993 | 18362 | tags=52%, list=3 |
| GO_KIDNE  | GO_KIDNEY_EPITHE  | 142 | -0.4243 | -1.6244 | 0.024  | 0.319798 | 0.985 | 7643  | tags=32%, list=1 |
| GO_PEPTID | GO_PEPTIDE_HORMC  | 50  | -0.4687 | -1.5649 | 0.0242 | 0.376976 | 0.994 | 20263 | tags=62%, list=3 |
| GO_RESPO  | GO_RESPONSE_TO_C  | 36  | -0.4759 | -1.5428 | 0.0242 | 0.37839  | 0.996 | 8443  | tags=33%, list=1 |
| GO_WNT_S  | GO_WNT_SIGNALINC  | 38  | -0.4995 | -1.6133 | 0.0243 | 0.326815 | 0.989 | 12463 | tags=53%, list=2 |
| GO_ADULT  | GO_ADULT_BEHAVIC  | 135 | -0.445  | -1.5853 | 0.0245 | 0.365517 | 0.993 | 15699 | tags=50%, list=2 |
| GO_COPI_C | GO_COPI_COATED_V  | 27  | -0.6025 | -1.729  | 0.0249 | 0.263145 | 0.916 | 7711  | tags=37%, list=1 |
| GO_REGUL  | GO_REGULATION_OI  | 33  | -0.5048 | -1.6372 | 0.0258 | 0.318085 | 0.981 | 5634  | tags=39%, list=1 |
| GO_PLACE  | GO_PLACENTA_BLOC  | 34  | -0.4513 | -1.5407 | 0.0262 | 0.380603 | 0.996 | 10185 | tags=44%, list=1 |
| GO_SCHWA  | GO_SCHWANN_CELL   | 38  | -0.4962 | -1.6472 | 0.0262 | 0.312183 | 0.977 | 15394 | tags=50%, list=2 |
| GO_APPEN  | GO_APPENDAGE_MC   | 145 | -0.4343 | -1.5684 | 0.0264 | 0.375026 | 0.994 | 8807  | tags=37%, list=1 |
| GO_NEGAT  | GO_NEGATIVE_REGU  | 28  | -0.4974 | -1.5531 | 0.0264 | 0.381506 | 0.995 | 8426  | tags=39%, list=1 |
| GO_CELLU  | GO_CELLULAR_RESF  | 16  | -0.5868 | -1.6156 | 0.0265 | 0.326286 | 0.989 | 3347  | tags=38%, list=6 |
| GO_SOMIT  | GO_SOMITE_DEVELC  | 88  | -0.4226 | -1.5587 | 0.0265 | 0.378348 | 0.995 | 6069  | tags=28%, list=1 |
| GO_PANCR  | GO_PANCREAS_DEV   | 78  | -0.4425 | -1.5103 | 0.0268 | 0.37477  | 0.999 | 11638 | tags=45%, list=2 |
| GO_CELL_C | GO_CELL_CELL_ADF  | 270 | -0.3962 | -1.538  | 0.0271 | 0.382841 | 0.996 | 12572 | tags=40%, list=2 |
| GO_OVULA  | GO_OVULATION_CY   | 47  | -0.453  | -1.5473 | 0.0274 | 0.380378 | 0.996 | 20688 | tags=62%, list=3 |
| GO_NEURA  | GO_NEURAL_TUBE_I  | 161 | -0.4123 | -1.547  | 0.0276 | 0.379553 | 0.996 | 10943 | tags=38%, list=1 |
| GO_REGUL  | GO_REGULATION_OI  | 347 | -0.3549 | -1.4692 | 0.0276 | 0.376559 | 0.999 | 13369 | tags=37%, list=2 |
| GO_MORPF  | GO_MORPHOGENESI   | 16  | -0.5837 | -1.5714 | 0.0282 | 0.372458 | 0.993 | 7643  | tags=50%, list=1 |
| GO_VASCU  | GO_VASCULOGENES   | 81  | -0.4784 | -1.6597 | 0.0283 | 0.298575 | 0.971 | 10247 | tags=44%, list=1 |
| GO_SMAD_  | GO_SMAD_PROTEIN_  | 76  | -0.4179 | -1.5315 | 0.0284 | 0.390527 | 0.996 | 18362 | tags=53%, list=3 |
| GO_NEGAT  | GO_NEGATIVE_REGU  | 21  | -0.5206 | -1.5681 | 0.0286 | 0.373968 | 0.994 | 8882  | tags=48%, list=1 |
| GO_DENDR  | GO_DENDRITE_DEVI  | 244 | -0.418  | -1.5886 | 0.0287 | 0.362631 | 0.993 | 10263 | tags=37%, list=1 |
| GO_POSIT  | GO_POSITIVE_REGUI | 372 | -0.3857 | -1.5142 | 0.0288 | 0.375148 | 0.999 | 12629 | tags=38%, list=2 |
| GO_POSIT  | GO_POSITIVE_REGUI | 28  | -0.4718 | -1.5288 | 0.029  | 0.384363 | 0.997 | 10307 | tags=39%, list=1 |
| GO_EMBRY  | GO_EMBRYONIC_AX   | 38  | -0.4416 | -1.5123 | 0.0291 | 0.37611  | 0.999 | 13642 | tags=45%, list=2 |
| GO_INTRIN | GO_INTRINSIC_COMI | 120 | -0.4771 | -1.5412 | 0.0295 | 0.380746 | 0.996 | 14870 | tags=52%, list=2 |
| GO_ADHER  | GO_ADHERENS_JUN   | 61  | -0.4666 | -1.5948 | 0.0296 | 0.357948 | 0.992 | 11122 | tags=39%, list=1 |
| GO_CALCII | GO_CALCIIUM_CHAN  | 63  | -0.4547 | -1.5463 | 0.0296 | 0.379993 | 0.996 | 10331 | tags=37%, list=1 |
| GO_REGUL  | GO_REGULATION_OI  | 52  | -0.5011 | -1.583  | 0.0296 | 0.35848  | 0.993 | 10263 | tags=50%, list=1 |
| GO_PEROX  | GO_PEROXISOME_PF  | 21  | -0.5168 | -1.6068 | 0.0297 | 0.333779 | 0.99  | 9464  | tags=43%, list=1 |
| GO_BETA_C | GO_BETA_CATENIN_  | 21  | -0.5482 | -1.6124 | 0.0298 | 0.327325 | 0.989 | 10834 | tags=48%, list=1 |
| GO_SEGME  | GO_SEGMENTATION   | 99  | -0.3861 | -1.4803 | 0.0298 | 0.373199 | 0.999 | 15942 | tags=44%, list=2 |

|           |                   |     |         |         |        |          |       |       |                  |
|-----------|-------------------|-----|---------|---------|--------|----------|-------|-------|------------------|
| GO_VENTR  | GO_VENTRICULAR_S  | 32  | -0.4956 | -1.5252 | 0.0298 | 0.375494 | 0.997 | 7111  | tags=31%, list=1 |
| GO_MAINT  | GO_MAINTENANCE_I  | 163 | -0.4096 | -1.5441 | 0.0299 | 0.382495 | 0.996 | 8726  | tags=31%, list=1 |
| GO_CHROM  | GO_CHROMATIN_DIS  | 18  | -0.6266 | -1.617  | 0.0301 | 0.328693 | 0.987 | 3233  | tags=39%, list=6 |
| GO_NUCLE  | GO_NUCLEUS_LOCA   | 28  | -0.5757 | -1.6102 | 0.0309 | 0.330886 | 0.989 | 6486  | tags=39%, list=1 |
| GO_TRANS  | GO_TRANSPORTER_C  | 324 | -0.4115 | -1.5319 | 0.0312 | 0.392375 | 0.996 | 14144 | tags=42%, list=2 |
| GO_NEURC  | GO_NEUROMUSCUL    | 49  | -0.4583 | -1.5518 | 0.0315 | 0.378383 | 0.995 | 10655 | tags=43%, list=1 |
| GO_POSIT  | GO_POSITIVE_REGUL | 185 | -0.3816 | -1.5053 | 0.0316 | 0.374772 | 0.999 | 13067 | tags=38%, list=2 |
| GO_MESOD  | GO_MESODERMAL_C   | 35  | -0.4666 | -1.5271 | 0.0323 | 0.377535 | 0.997 | 5704  | tags=31%, list=1 |
| GO_DENDR  | GO_DENDRITIC_SPIN | 61  | -0.4538 | -1.5428 | 0.0324 | 0.381283 | 0.996 | 9869  | tags=34%, list=1 |
| GO_NEURC  | GO_NEURON_RECOC   | 50  | -0.4769 | -1.5906 | 0.0324 | 0.362842 | 0.993 | 8082  | tags=34%, list=1 |
| GO_FRIZZL | GO_FRIZZLED_BINDI | 38  | -0.4639 | -1.517  | 0.0324 | 0.379938 | 0.998 | 11983 | tags=42%, list=2 |
| GO_MESON  | GO_MESONEPHRIC_I  | 66  | -0.4314 | -1.529  | 0.0327 | 0.386541 | 0.996 | 5634  | tags=29%, list=1 |
| GO_PRESY  | GO_PRESYNAPTIC_M  | 15  | -0.6198 | -1.5562 | 0.0329 | 0.381544 | 0.995 | 6730  | tags=40%, list=1 |
| GO_INTRIN | GO_INTRINSIC_COMI | 163 | -0.4531 | -1.5    | 0.0331 | 0.36916  | 0.999 | 11122 | tags=43%, list=1 |
| GO_EXCIT  | GO_EXCITATORY_SY  | 26  | -0.5277 | -1.5285 | 0.0332 | 0.382209 | 0.997 | 6442  | tags=42%, list=1 |
| GO_RIBOS  | GO_RIBOSOMAL_SM   | 17  | -0.6188 | -1.6646 | 0.0332 | 0.293132 | 0.97  | 5882  | tags=24%, list=1 |
| GO_EPITHE | GO_EPITHELIAL_TO  | 148 | -0.4151 | -1.5761 | 0.0333 | 0.36732  | 0.993 | 12664 | tags=42%, list=2 |
| GO_REGUL  | GO_REGULATION_OI  | 50  | -0.5124 | -1.6165 | 0.0333 | 0.327977 | 0.987 | 4065  | tags=26%, list=7 |
| GO_INTRIN | GO_INTRINSIC_COMI | 52  | -0.4845 | -1.5084 | 0.0333 | 0.37218  | 0.999 | 14870 | tags=52%, list=2 |
| GO_NEURC  | GO_NEUROTROPHIN   | 39  | -0.4614 | -1.5059 | 0.0335 | 0.374604 | 0.999 | 7373  | tags=38%, list=1 |
| GO_SYNAP  | GO_SYNAPSE_ORGA   | 422 | -0.3813 | -1.5008 | 0.0336 | 0.373816 | 0.999 | 11448 | tags=37%, list=2 |
| GO_MONO   | GO_MONOVALENT_I   | 361 | -0.3371 | -1.4204 | 0.0337 | 0.384857 | 1     | 15786 | tags=40%, list=2 |
| GO_REGUL  | GO_REGULATION_OI  | 188 | -0.4179 | -1.5264 | 0.0341 | 0.377724 | 0.997 | 9188  | tags=39%, list=1 |
| GO_SOMIT  | GO_SOMITOGENESIS  | 69  | -0.4144 | -1.508  | 0.0341 | 0.371905 | 0.999 | 6069  | tags=28%, list=1 |
| GO_REPRO  | GO_REPRODUCTIVE   | 30  | -0.4604 | -1.5601 | 0.0343 | 0.378045 | 0.995 | 7870  | tags=30%, list=1 |
| GO_SEN    | GO_SENSORY_SYSTE  | 391 | -0.3485 | -1.4389 | 0.0346 | 0.382381 | 1     | 15699 | tags=44%, list=2 |
| GO_SCHWA  | GO_SCHWANN_CELL   | 30  | -0.4949 | -1.5709 | 0.0346 | 0.371963 | 0.993 | 15394 | tags=53%, list=2 |
| GO_POSIT  | GO_POSITIVE_REGUL | 40  | -0.4682 | -1.5118 | 0.0348 | 0.375911 | 0.999 | 13631 | tags=43%, list=2 |
| GO_REGUL  | GO_REGULATION_OI  | 18  | -0.5795 | -1.5917 | 0.0349 | 0.361865 | 0.993 | 9771  | tags=50%, list=1 |
| GO_SCHAF  | GO_SCHAFFER_COLI  | 83  | -0.4225 | -1.5003 | 0.0351 | 0.371716 | 0.999 | 14369 | tags=42%, list=2 |
| GO_INTRIN | GO_INTRINSIC_COMI | 75  | -0.4842 | -1.4908 | 0.0357 | 0.371938 | 0.999 | 11028 | tags=45%, list=1 |
| GO_REGUL  | GO_REGULATION_OI  | 36  | -0.4625 | -1.5088 | 0.0359 | 0.37372  | 0.999 | 15888 | tags=53%, list=2 |
| GO_DORSA  | GO_DORSAL_VENTR   | 92  | -0.4179 | -1.4916 | 0.0359 | 0.371296 | 0.999 | 17220 | tags=49%, list=2 |
| GO_REGUL  | GO_REGULATION_OI  | 65  | -0.4121 | -1.463  | 0.0359 | 0.383785 | 0.999 | 12950 | tags=37%, list=2 |
| GO_REGUL  | GO_REGULATION_OI  | 32  | -0.4806 | -1.553  | 0.0359 | 0.380316 | 0.995 | 15514 | tags=44%, list=2 |
| GO_CARDI  | GO_CARDIAC_MYOF   | 19  | -0.5787 | -1.5644 | 0.0361 | 0.376372 | 0.994 | 17984 | tags=68%, list=3 |
| GO_CYCLIC | GO_CYCLIC_NUCLEC  | 20  | -0.5597 | -1.5479 | 0.0362 | 0.380407 | 0.996 | 19084 | tags=75%, list=3 |
| GO_EMBRY  | GO_EMBRYONIC_CA   | 28  | -0.5154 | -1.5736 | 0.0363 | 0.370075 | 0.993 | 13841 | tags=54%, list=2 |
| GO_RECEP  | GO_RECEPTOR_INTE  | 113 | -0.3934 | -1.457  | 0.0363 | 0.386055 | 1     | 8230  | tags=35%, list=1 |
| GO_MORPH  | GO_MORPHOGENESI   | 150 | -0.3888 | -1.5194 | 0.0365 | 0.376702 | 0.998 | 10943 | tags=37%, list=1 |
| GO_STEM   | GO_STEM_CELL_PRC  | 126 | -0.3823 | -1.4691 | 0.0368 | 0.375916 | 0.999 | 11374 | tags=33%, list=1 |
| GO_CATEN  | GO_CATENIN_COMPI  | 31  | -0.5346 | -1.5904 | 0.0369 | 0.361601 | 0.993 | 5308  | tags=32%, list=9 |
| GO_NEGAT  | GO_NEGATIVE_REGU  | 23  | -0.5081 | -1.5517 | 0.0373 | 0.377142 | 0.995 | 22837 | tags=70%, list=3 |
| GO_ARF_P  | GO_ARF_PROTEIN_SI | 18  | -0.5521 | -1.5981 | 0.0373 | 0.353334 | 0.992 | 12242 | tags=61%, list=2 |
| GO_CORON  | GO_CORONARY_VAS   | 49  | -0.5091 | -1.6253 | 0.0375 | 0.319585 | 0.985 | 10888 | tags=39%, list=1 |
| GO_RESPO  | GO_RESPONSE_TO_C  | 47  | -0.424  | -1.4765 | 0.0375 | 0.378663 | 0.999 | 6841  | tags=28%, list=1 |
| GO_EMBRY  | GO_EMBRYONIC_EY   | 37  | -0.478  | -1.5271 | 0.0376 | 0.378846 | 0.997 | 10943 | tags=46%, list=1 |
| GO_METAL  | GO_METAL_ION_TRA  | 426 | -0.3486 | -1.4233 | 0.0377 | 0.385554 | 1     | 16280 | tags=44%, list=2 |
| GO_PULMC  | GO_PULMONARY_V    | 17  | -0.6237 | -1.5528 | 0.0381 | 0.377614 | 0.995 | 15184 | tags=65%, list=2 |
| GO_MATIN  | GO_MATING         | 41  | -0.4088 | -1.4234 | 0.0382 | 0.386168 | 1     | 9389  | tags=32%, list=1 |
| GO_NEURC  | GO_NEURON_PROJE   | 91  | -0.4086 | -1.4892 | 0.0382 | 0.370398 | 0.999 | 10114 | tags=35%, list=1 |
| GO_PERIPH | GO_PERIPHERAL_NE  | 74  | -0.4062 | -1.4828 | 0.0382 | 0.373657 | 0.999 | 8858  | tags=35%, list=1 |
| GO_CARDI  | GO_CARDIAC_CELL   | 88  | -0.4114 | -1.4897 | 0.0383 | 0.371408 | 0.999 | 12950 | tags=39%, list=2 |
| GO_GAMM   | GO_GAMMA_AMINO    | 16  | -0.5455 | -1.5256 | 0.0384 | 0.375802 | 0.997 | 15095 | tags=75%, list=2 |
| GO_ANTER  | GO_ANTERIOR_POST  | 51  | -0.4309 | -1.5118 | 0.0386 | 0.373611 | 0.999 | 17335 | tags=55%, list=3 |
| GO_CARDI  | GO_CARDIAC_COND   | 146 | -0.4104 | -1.4946 | 0.0387 | 0.37066  | 0.999 | 16182 | tags=45%, list=2 |
| GO_FOREB  | GO_FOREBRAIN_NEU  | 26  | -0.515  | -1.5555 | 0.039  | 0.381846 | 0.995 | 11013 | tags=50%, list=1 |
| GO_BONE   | GO_BONE_MORPHOC   | 92  | -0.4374 | -1.4949 | 0.039  | 0.372163 | 0.999 | 16214 | tags=54%, list=2 |

|           |                   |     |         |         |        |          |       |       |                  |
|-----------|-------------------|-----|---------|---------|--------|----------|-------|-------|------------------|
| GO_FOREB  | GO_FOREBRAIN_DEV  | 384 | -0.385  | -1.4746 | 0.0394 | 0.377876 | 0.999 | 15429 | tags=45%, list=2 |
| GO_MESEN  | GO_MESENCHYMAL    | 225 | -0.3979 | -1.5546 | 0.0396 | 0.382532 | 0.995 | 11983 | tags=41%, list=2 |
| GO_REGUL  | GO_REGULATION_OI  | 23  | -0.538  | -1.521  | 0.0396 | 0.376594 | 0.997 | 19852 | tags=74%, list=3 |
| GO_REGUL  | GO_REGULATION_OI  | 105 | -0.3798 | -1.4168 | 0.0396 | 0.384233 | 1     | 13991 | tags=41%, list=2 |
| GO_NEURA  | GO_NEURAL_CREST   | 89  | -0.3974 | -1.4761 | 0.0401 | 0.37846  | 0.999 | 15503 | tags=48%, list=2 |
| GO_CATIO  | GO_CATION_CHANNA  | 216 | -0.4279 | -1.4988 | 0.0409 | 0.368579 | 0.999 | 15172 | tags=44%, list=2 |
| GO_CRANI  | GO_CRANIOFACIAL   | 17  | -0.5953 | -1.5656 | 0.0412 | 0.376641 | 0.994 | 11834 | tags=59%, list=2 |
| GO_PHARY  | GO_PHARYNGEAL_S   | 25  | -0.5129 | -1.5259 | 0.0412 | 0.37643  | 0.997 | 15096 | tags=48%, list=2 |
| GO_CHEMC  | GO_CHEMOSENSORY   | 17  | -0.5547 | -1.5198 | 0.0413 | 0.376896 | 0.998 | 8980  | tags=47%, list=1 |
| GO_RNA_P  | GO_RNA_POLYMER    | 55  | -0.4505 | -1.5134 | 0.0413 | 0.374718 | 0.999 | 5294  | tags=27%, list=9 |
| GO_PATTE  | GO_PATTERN_SPECI  | 452 | -0.3474 | -1.4356 | 0.0413 | 0.383824 | 1     | 17224 | tags=44%, list=2 |
| GO_RENAL  | GO_RENAL_TUBULE   | 95  | -0.3892 | -1.4612 | 0.0413 | 0.384978 | 0.999 | 13137 | tags=40%, list=2 |
| GO_SOLUT  | GO_SOLUTE_SODIUM  | 72  | -0.3816 | -1.4069 | 0.0414 | 0.382752 | 1     | 18772 | tags=50%, list=3 |
| GO_RENAL  | GO_RENAL_WATER    | 37  | -0.4654 | -1.5369 | 0.0415 | 0.38396  | 0.996 | 15488 | tags=51%, list=2 |
| GO_NEGAT  | GO_NEGATIVE_REGU  | 219 | -0.3797 | -1.4952 | 0.0415 | 0.374587 | 0.999 | 8823  | tags=35%, list=1 |
| GO_MULTIC | GO_MULTICELLULAR  | 53  | -0.4019 | -1.4761 | 0.0416 | 0.377564 | 0.999 | 12152 | tags=40%, list=2 |
| GO_CELL_M | GO_CELL_MIGRATIO  | 15  | -0.5884 | -1.495  | 0.0417 | 0.372927 | 0.999 | 1749  | tags=33%, list=3 |
| GO_CARTIL | GO_CARTILAGE_DEV  | 186 | -0.4235 | -1.5534 | 0.0417 | 0.38255  | 0.995 | 8947  | tags=32%, list=1 |
| GO_REGUL  | GO_REGULATION_OI  | 96  | -0.4242 | -1.5431 | 0.0419 | 0.381986 | 0.996 | 8211  | tags=34%, list=1 |
| GO_PHOTO  | GO_PHOTORECEPTO   | 40  | -0.4993 | -1.5145 | 0.0419 | 0.37563  | 0.999 | 18301 | tags=50%, list=3 |
| GO_NEPHR  | GO_NEPHRON_DEVE   | 143 | -0.3999 | -1.5037 | 0.042  | 0.374113 | 0.999 | 12175 | tags=39%, list=2 |
| GO_SYNAP  | GO_SYNAPSE_ASSEM  | 176 | -0.4015 | -1.4806 | 0.0421 | 0.373555 | 0.999 | 11122 | tags=38%, list=1 |
| GO_POSTS  | GO_POSTSYNAPSE_A  | 31  | -0.5509 | -1.5437 | 0.0422 | 0.381952 | 0.996 | 10943 | tags=52%, list=1 |
| GO_POSIT  | GO_POSITIVE_REGUI | 35  | -0.4804 | -1.5012 | 0.0425 | 0.374105 | 0.999 | 13137 | tags=43%, list=2 |
| GO_RESPIR | GO_RESPIRATORY_C  | 66  | -0.3995 | -1.4208 | 0.0428 | 0.385527 | 1     | 9188  | tags=35%, list=1 |
| GO_RETIN  | GO_RETINA_VASCUI  | 18  | -0.6418 | -1.6469 | 0.0428 | 0.31084  | 0.977 | 14838 | tags=67%, list=2 |
| GO_REGUL  | GO_REGULATION_OI  | 280 | -0.3381 | -1.3726 | 0.0428 | 0.395377 | 1     | 14188 | tags=40%, list=2 |
| GO_NEURC  | GO_NEURON_PROJEC  | 59  | -0.4266 | -1.5156 | 0.0434 | 0.37939  | 0.998 | 15514 | tags=44%, list=2 |
| GO_ADULT  | GO_ADULT_LOCOMO   | 74  | -0.4268 | -1.4833 | 0.0436 | 0.373603 | 0.999 | 15699 | tags=54%, list=2 |
| GO_DEVEL  | GO_DEVELOPMENTA   | 233 | -0.3881 | -1.4916 | 0.0437 | 0.372188 | 0.999 | 8067  | tags=30%, list=1 |
| GO_SYNAP  | GO_SYNAPTIC_MEM   | 380 | -0.4048 | -1.4715 | 0.0437 | 0.376345 | 0.999 | 13280 | tags=45%, list=2 |
| GO_REGUL  | GO_REGULATION_OI  | 127 | -0.3856 | -1.4487 | 0.0438 | 0.384876 | 1     | 5887  | tags=24%, list=1 |
| GO_ACTIVI | GO_ACTIVE_ION_TR  | 228 | -0.3293 | -1.3869 | 0.0438 | 0.391148 | 1     | 15786 | tags=40%, list=2 |
| GO_TRANS  | GO_TRANSFERASE_A  | 21  | -0.5319 | -1.5442 | 0.044  | 0.383781 | 0.996 | 7085  | tags=33%, list=1 |
| GO_NEGAT  | GO_NEGATIVE_REGU  | 130 | -0.388  | -1.482  | 0.0442 | 0.374365 | 0.999 | 17271 | tags=45%, list=3 |
| GO_MIDBR  | GO_MIDBRAIN_DEVI  | 88  | -0.3999 | -1.4699 | 0.0443 | 0.375855 | 0.999 | 13941 | tags=41%, list=2 |
| GO_POSTS  | GO_POSTSYNAPSE_C  | 171 | -0.3875 | -1.5094 | 0.0444 | 0.37352  | 0.999 | 11448 | tags=36%, list=2 |
| GO_ESTAB  | GO_ESTABLISHMEN   | 25  | -0.5343 | -1.5232 | 0.0446 | 0.377578 | 0.997 | 5615  | tags=40%, list=1 |
| GO_NEGAT  | GO_NEGATIVE_REGU  | 85  | -0.3763 | -1.4487 | 0.0446 | 0.38239  | 1     | 13913 | tags=39%, list=2 |
| GO_POSIT  | GO_POSITIVE_REGUI | 33  | -0.4591 | -1.474  | 0.0448 | 0.377376 | 0.999 | 8409  | tags=30%, list=1 |
| GO_REGUL  | GO_REGULATION_OI  | 142 | -0.4428 | -1.4994 | 0.0454 | 0.369539 | 0.999 | 16853 | tags=54%, list=2 |
| GO_NEGAT  | GO_NEGATIVE_REGU  | 32  | -0.4805 | -1.5394 | 0.0455 | 0.382493 | 0.996 | 4614  | tags=34%, list=8 |
| GO_INTRA  | GO_INTRASPECIES_I | 52  | -0.4489 | -1.4813 | 0.0455 | 0.375021 | 0.999 | 15769 | tags=48%, list=2 |
| GO_REGUL  | GO_REGULATION_OI  | 67  | -0.394  | -1.4469 | 0.0456 | 0.381044 | 1     | 8409  | tags=28%, list=1 |
| GO_REGUL  | GO_REGULATION_OI  | 47  | -0.4459 | -1.4894 | 0.0458 | 0.371073 | 0.999 | 8907  | tags=38%, list=1 |
| GO_SULFU  | GO_SULFUR_AMINO   | 16  | -0.58   | -1.5318 | 0.0459 | 0.391051 | 0.996 | 2548  | tags=31%, list=4 |
| GO_CYCLIC | GO_CYCLIC_NUCLEC  | 38  | -0.4794 | -1.5297 | 0.0459 | 0.387693 | 0.996 | 17430 | tags=58%, list=3 |
| GO_REGUL  | GO_REGULATION_OI  | 45  | -0.4745 | -1.5333 | 0.046  | 0.390429 | 0.996 | 11645 | tags=44%, list=2 |
| GO_NEPHR  | GO_NEPHRON_EPITH  | 110 | -0.3854 | -1.45   | 0.046  | 0.388036 | 1     | 13137 | tags=38%, list=2 |
| GO_NEGAT  | GO_NEGATIVE_REGU  | 15  | -0.5455 | -1.5146 | 0.046  | 0.376688 | 0.999 | 8426  | tags=47%, list=1 |
| GO_REGUL  | GO_REGULATION_OI  | 17  | -0.5904 | -1.5481 | 0.0463 | 0.381577 | 0.996 | 18511 | tags=76%, list=3 |
| GO_TELEN  | GO_TELENCEPHALO   | 252 | -0.3832 | -1.4543 | 0.0465 | 0.389536 | 1     | 15888 | tags=43%, list=2 |
| GO_DYNEI  | GO_DYNEIN_LIGHT   | 27  | -0.4692 | -1.5034 | 0.0467 | 0.373516 | 0.999 | 13484 | tags=56%, list=2 |
| GO_REGUL  | GO_REGULATION_OI  | 303 | -0.3707 | -1.476  | 0.0469 | 0.376874 | 0.999 | 12518 | tags=38%, list=2 |
| GO_REGUL  | GO_REGULATION_OI  | 18  | -0.5438 | -1.539  | 0.047  | 0.381963 | 0.996 | 10943 | tags=44%, list=1 |
| GO_EPHRI  | GO_EPHRIN_RECEPT  | 19  | -0.5665 | -1.5759 | 0.0474 | 0.366214 | 0.993 | 9789  | tags=47%, list=1 |
| GO_REGUL  | GO_REGULATION_OI  | 143 | -0.3681 | -1.4057 | 0.0474 | 0.383133 | 1     | 9573  | tags=35%, list=1 |
| GO_REGUL  | GO_REGULATION_OI  | 15  | -0.5916 | -1.5136 | 0.0476 | 0.375346 | 0.999 | 5887  | tags=40%, list=1 |

|           |                   |     |         |         |        |          |       |       |                   |
|-----------|-------------------|-----|---------|---------|--------|----------|-------|-------|-------------------|
| GO_TRANS  | GO_TRANSMEMBRAL   | 18  | -0.5585 | -1.562  | 0.0477 | 0.377881 | 0.994 | 9810  | tags=44%, list=1' |
| GO_POTAS  | GO_POTASSIUM_ION  | 240 | -0.3596 | -1.4025 | 0.0479 | 0.38275  | 1     | 15498 | tags=41%, list=2  |
| GO_NEGAT  | GO_NEGATIVE_REGU  | 25  | -0.5086 | -1.5529 | 0.0482 | 0.378897 | 0.995 | 17119 | tags=60%, list=2  |
| GO_INTRO  | GO_INTRONIC_TRAN  | 16  | -0.5571 | -1.5285 | 0.0482 | 0.380879 | 0.997 | 19979 | tags=69%, list=3  |
| GO_REGUL  | GO_REGULATION_OI  | 26  | -0.4895 | -1.5068 | 0.0484 | 0.373599 | 0.999 | 10731 | tags=42%, list=1  |
| GO_CGMP   | GO_CGMP_BINDING   | 15  | -0.5348 | -1.4863 | 0.0484 | 0.372729 | 0.999 | 19825 | tags=67%, list=3  |
| GO_NEGAT  | GO_NEGATIVE_REGU  | 23  | -0.4912 | -1.5102 | 0.0486 | 0.373752 | 0.999 | 22382 | tags=65%, list=3  |
| GO_COPI   | GO_COPI_COATED_V  | 17  | -0.6707 | -1.651  | 0.0488 | 0.309333 | 0.976 | 10811 | tags=59%, list=1' |
| GO_ECTOD  | GO_ECTODERM_DEV   | 22  | -0.4755 | -1.481  | 0.0491 | 0.373749 | 0.999 | 2934  | tags=32%, list=5  |
| GO_MICRO  | GO_MICROTUBULE_I  | 77  | -0.4783 | -1.5597 | 0.0492 | 0.377525 | 0.995 | 14495 | tags=51%, list=2  |
| GO_REGUL  | GO_REGULATION_OI  | 66  | -0.4635 | -1.5235 | 0.0495 | 0.378113 | 0.997 | 7894  | tags=36%, list=1  |
| GO_CALCII | GO_CALCIIUM_ION_I | 80  | -0.3877 | -1.4417 | 0.0497 | 0.380407 | 1     | 14054 | tags=41%, list=2  |
| GO_NBAF   | GO_NBAF_COMPLEX   | 15  | -0.6704 | -1.5841 | 0.0499 | 0.359415 | 0.993 | 12635 | tags=67%, list=2  |
| GO_NEGAT  | GO_NEGATIVE_REGU  | 41  | -0.4245 | -1.4594 | 0.0502 | 0.38442  | 1     | 9340  | tags=34%, list=1  |
| GO_BETA   | GO_BETA_CATENIN_  | 30  | -0.5507 | -1.5662 | 0.0503 | 0.376976 | 0.994 | 9740  | tags=43%, list=1' |
| GO_ATP_DI | GO_ATP_DEPENDEN   | 18  | -0.5382 | -1.528  | 0.0503 | 0.380718 | 0.997 | 13484 | tags=56%, list=2  |
| GO_CEREB  | GO_CEREBELLAR_PU  | 25  | -0.5338 | -1.5496 | 0.0504 | 0.380833 | 0.995 | 11744 | tags=56%, list=2  |
| GO_REGUL  | GO_REGULATION_OI  | 20  | -0.4843 | -1.4905 | 0.0507 | 0.370511 | 0.999 | 5704  | tags=25%, list=1' |
| GO_ACTIN  | GO_ACTIN_MEDIATE  | 120 | -0.4123 | -1.4714 | 0.0507 | 0.375572 | 0.999 | 11874 | tags=37%, list=2  |
| GO_AXON   | GO_AXONAL_GROW    | 28  | -0.4946 | -1.5218 | 0.0508 | 0.375883 | 0.997 | 12361 | tags=57%, list=2  |
| GO_LUNG   | GO_LUNG_MORPHOC   | 52  | -0.4457 | -1.5286 | 0.0508 | 0.383311 | 0.997 | 8585  | tags=37%, list=1  |
| GO_NEURA  | GO_NEURAL_TUBE_I  | 105 | -0.418  | -1.531  | 0.0511 | 0.390217 | 0.996 | 10943 | tags=39%, list=1' |
| GO_POSITI | GO_POSITIVE_REGUI | 82  | -0.3316 | -1.342  | 0.0511 | 0.408383 | 1     | 7119  | tags=26%, list=1  |
| GO_CARDI  | GO_CARDIAC_MUSC   | 54  | -0.4443 | -1.4715 | 0.0515 | 0.377278 | 0.999 | 10232 | tags=39%, list=1  |
| GO_SULFU  | GO_SULFUR_COMPO   | 56  | -0.4306 | -1.4672 | 0.0519 | 0.37813  | 0.999 | 13771 | tags=43%, list=2  |
| GO_REGUL  | GO_REGULATION_OI  | 65  | -0.4333 | -1.4787 | 0.0522 | 0.374828 | 0.999 | 4065  | tags=22%, list=7  |
| GO_KIDNE  | GO_KIDNEY_MORPH   | 94  | -0.3752 | -1.4277 | 0.0522 | 0.390861 | 1     | 7643  | tags=29%, list=1  |
| GO_CARBO  | GO_CARBOXY_LYAS   | 33  | -0.4872 | -1.5158 | 0.0525 | 0.380011 | 0.998 | 10225 | tags=39%, list=1  |
| GO_POSITI | GO_POSITIVE_REGUI | 15  | -0.5346 | -1.5221 | 0.0526 | 0.37643  | 0.997 | 5842  | tags=40%, list=1' |
| GO_CHLOR  | GO_CHLORIDE_CHA   | 49  | -0.452  | -1.5098 | 0.0527 | 0.373612 | 0.999 | 12825 | tags=49%, list=2  |
| GO_ESTRO  | GO_ESTROGEN_RECI  | 39  | -0.4396 | -1.4343 | 0.0532 | 0.384227 | 1     | 8274  | tags=38%, list=1  |
| GO_LOCOM  | GO_LOCOMOTORY_I   | 193 | -0.3802 | -1.4657 | 0.0533 | 0.379727 | 0.999 | 11233 | tags=38%, list=1' |
| GO_CELL   | GO_CELL_FATE_COM  | 34  | -0.4488 | -1.4591 | 0.0535 | 0.384196 | 1     | 10888 | tags=44%, list=1' |
| GO_REGUL  | GO_REGULATION_OI  | 43  | -0.4026 | -1.4236 | 0.0536 | 0.387155 | 1     | 10307 | tags=35%, list=1  |
| GO_CELL   | GO_CELL_DIFFEREN  | 57  | -0.4429 | -1.47   | 0.0536 | 0.376694 | 0.999 | 9318  | tags=37%, list=1  |
| GO_POSITI | GO_POSITIVE_REGUI | 282 | -0.369  | -1.4487 | 0.0536 | 0.384081 | 1     | 10105 | tags=32%, list=1' |
| GO_AMINO  | GO_AMINO_ACID_CA  | 19  | -0.5155 | -1.4846 | 0.0537 | 0.371608 | 0.999 | 15413 | tags=58%, list=2  |
| GO_ENDOC  | GO_ENDOCRINE_PRC  | 81  | -0.4007 | -1.4445 | 0.0539 | 0.379522 | 1     | 15424 | tags=40%, list=2  |
| GO_MODIF  | GO_MODIFICATION_I | 24  | -0.5353 | -1.526  | 0.0544 | 0.377365 | 0.997 | 5959  | tags=38%, list=1' |
| GO_EXPOR  | GO_EXPORT_ACROS   | 60  | -0.4165 | -1.4745 | 0.0545 | 0.377288 | 0.999 | 14054 | tags=45%, list=2  |
| GO_NEGAT  | GO_NEGATIVE_REGU  | 15  | -0.5543 | -1.5226 | 0.0547 | 0.377768 | 0.997 | 7826  | tags=47%, list=1  |
| GO_CILIUM | GO_CILIUM_OR_FLA  | 115 | -0.3776 | -1.4462 | 0.0547 | 0.380933 | 1     | 16638 | tags=43%, list=2  |
| GO_LIGANI | GO_LIGAND_GATED   | 19  | -0.6288 | -1.5639 | 0.0549 | 0.375897 | 0.994 | 12500 | tags=68%, list=2  |
| GO_HMG_B  | GO_HMG_BOX_DOM    | 16  | -0.5455 | -1.5002 | 0.055  | 0.36976  | 0.999 | 8839  | tags=44%, list=1  |
| GO_COLLE  | GO_COLLECTING_DU  | 15  | -0.5533 | -1.519  | 0.055  | 0.376265 | 0.998 | 7640  | tags=40%, list=1  |
| GO_TRANS  | GO_TRANSMEMBRAL   | 23  | -0.5035 | -1.4948 | 0.0551 | 0.371423 | 0.999 | 7643  | tags=39%, list=1  |
| GO_CENTR  | GO_CENTRAL_NERV   | 192 | -0.4167 | -1.5048 | 0.0551 | 0.372675 | 0.999 | 15429 | tags=48%, list=2  |
| GO_LUNG   | GO_LUNG_ALVEOLU   | 41  | -0.4767 | -1.5289 | 0.0552 | 0.385472 | 0.997 | 10888 | tags=44%, list=1' |
| GO_VITAM  | GO_VITAMIN_TRANS  | 40  | -0.4318 | -1.4536 | 0.0553 | 0.389075 | 1     | 14640 | tags=40%, list=2  |
| GO_TUBE   | GO_TUBE_FORMATIC  | 149 | -0.384  | -1.4973 | 0.0557 | 0.370929 | 0.999 | 10943 | tags=36%, list=1' |
| GO_BRANC  | GO_BRANCHING_MC   | 155 | -0.3721 | -1.4439 | 0.0557 | 0.379033 | 1     | 9208  | tags=33%, list=1  |
| GO_MEMBI  | GO_MEMBRANE_DEI   | 23  | -0.5418 | -1.5053 | 0.0561 | 0.373817 | 0.999 | 20619 | tags=70%, list=3  |
| GO_FEEDIN | GO_FEEDING_BEHAV  | 105 | -0.3887 | -1.4154 | 0.0562 | 0.384766 | 1     | 16390 | tags=42%, list=2  |
| GO_INHIBI | GO_INHIBITORY_EX  | 15  | -0.6619 | -1.57   | 0.0563 | 0.372443 | 0.994 | 12500 | tags=73%, list=2  |
| GO_MEMBI  | GO_MEMBRANE_DEI   | 37  | -0.4955 | -1.4935 | 0.0564 | 0.371092 | 0.999 | 16280 | tags=54%, list=2  |
| GO_EMBRY  | GO_EMBRYONIC_HE   | 80  | -0.3897 | -1.4487 | 0.0565 | 0.383224 | 1     | 12794 | tags=39%, list=2  |
| GO_REGUL  | GO_REGULATION_OI  | 72  | -0.4098 | -1.4431 | 0.0566 | 0.379025 | 1     | 10140 | tags=33%, list=1' |
| GO_POSITI | GO_POSITIVE_REGUI | 85  | -0.3733 | -1.4073 | 0.0566 | 0.382764 | 1     | 11153 | tags=32%, list=1' |

|           |                   |     |         |         |        |          |       |       |                   |
|-----------|-------------------|-----|---------|---------|--------|----------|-------|-------|-------------------|
| GO_REGUL  | GO_REGULATION_OF  | 16  | -0.627  | -1.5295 | 0.0568 | 0.386844 | 0.996 | 10105 | tags=56%, list=1' |
| GO_VITAM  | GO_VITAMIN_TRANS  | 29  | -0.4714 | -1.4622 | 0.0568 | 0.383761 | 0.999 | 14640 | tags=45%, list=2. |
| GO_MYELI  | GO_MYELIN_ASSEMB  | 21  | -0.5278 | -1.5118 | 0.0569 | 0.374785 | 0.999 | 13008 | tags=57%, list=2. |
| GO_POST_E | GO_POST_EMBRYON   | 83  | -0.3794 | -1.4336 | 0.0569 | 0.384136 | 1     | 5942  | tags=25%, list=1' |
| GO_SYNTA  | GO_SYNTAXIN_1_BI  | 26  | -0.5412 | -1.5204 | 0.0572 | 0.376827 | 0.997 | 16853 | tags=73%, list=2  |
| GO_MANGA  | GO_MANGANESE_IO   | 15  | -0.5209 | -1.4472 | 0.0574 | 0.383078 | 1     | 15610 | tags=53%, list=2  |
| GO_POSITI | GO_POSITIVE_REGUL | 43  | -0.4604 | -1.5003 | 0.0574 | 0.372726 | 0.999 | 16573 | tags=49%, list=2  |
| GO_REGUL  | GO_REGULATION_OF  | 46  | -0.409  | -1.4457 | 0.0577 | 0.380976 | 1     | 7861  | tags=30%, list=1. |
| GO_LYSOS  | GO_LYSOSOMAL_PR   | 15  | -0.5449 | -1.5302 | 0.0577 | 0.387903 | 0.996 | 3754  | tags=33%, list=6  |
| GO_LONG_  | GO_LONG_TERM_SY   | 86  | -0.4001 | -1.4536 | 0.058  | 0.388309 | 1     | 8907  | tags=36%, list=1. |
| GO_PATHW  | GO_PATHWAY_REST   | 65  | -0.4139 | -1.4793 | 0.058  | 0.374575 | 0.999 | 18362 | tags=51%, list=3  |
| GO_VITAM  | GO_VITAMIN_B6_BI  | 48  | -0.4125 | -1.4477 | 0.0585 | 0.383698 | 1     | 6471  | tags=27%, list=1  |
| GO_REGUL  | GO_REGULATION_OF  | 301 | -0.3471 | -1.414  | 0.0585 | 0.384134 | 1     | 12067 | tags=34%, list=2  |
| GO_TRIPA  | GO_TRIPARTITE_REC | 15  | -0.5036 | -1.451  | 0.0591 | 0.389456 | 1     | 12828 | tags=53%, list=2  |
| GO_MESOD  | GO_MESODERM_MO    | 75  | -0.3805 | -1.4165 | 0.0591 | 0.383992 | 1     | 10951 | tags=37%, list=1' |
| GO_REGUL  | GO_REGULATION_OF  | 76  | -0.3886 | -1.3934 | 0.0591 | 0.387511 | 1     | 13137 | tags=38%, list=2  |
| GO_GLOME  | GO_GLOMERULUS_D   | 64  | -0.4765 | -1.5279 | 0.0592 | 0.379726 | 0.997 | 11652 | tags=41%, list=2  |
| GO_POSITI | GO_POSITIVE_REGUL | 154 | -0.3687 | -1.441  | 0.0593 | 0.381197 | 1     | 9996  | tags=32%, list=1' |
| GO_REGUL  | GO_REGULATION_OF  | 23  | -0.5162 | -1.4951 | 0.0594 | 0.373725 | 0.999 | 7790  | tags=43%, list=1  |
| GO_MODIF  | GO_MODIFICATION_  | 18  | -0.5639 | -1.5013 | 0.0595 | 0.374817 | 0.999 | 1449  | tags=28%, list=2  |
| GO_NEGAT  | GO_NEGATIVE_REGU  | 59  | -0.3704 | -1.3792 | 0.0596 | 0.394962 | 1     | 18325 | tags=49%, list=3  |
| GO_NEURA  | GO_NEURAL_RETINA  | 72  | -0.4093 | -1.4374 | 0.0598 | 0.384894 | 1     | 15415 | tags=46%, list=2  |
| GO_NUCLE  | GO_NUCLEAR_TRAN   | 31  | -0.4979 | -1.5015 | 0.0599 | 0.375632 | 0.999 | 12332 | tags=39%, list=2  |
| GO_REGUL  | GO_REGULATION_OF  | 89  | -0.4084 | -1.4602 | 0.06   | 0.383421 | 0.999 | 14016 | tags=44%, list=2. |
| GO_NEURC  | GO_NEUROBLAST_D   | 15  | -0.5701 | -1.5275 | 0.0604 | 0.379314 | 0.997 | 10477 | tags=53%, list=1  |
| GO_EXCIT  | GO_EXCITATORY_SY  | 52  | -0.4835 | -1.515  | 0.0604 | 0.378197 | 0.999 | 10885 | tags=50%, list=1' |
| GO_DENDR  | GO_DENDRITIC_SHA  | 37  | -0.4607 | -1.455  | 0.0607 | 0.388765 | 1     | 16473 | tags=59%, list=2  |
| GO_NEURC  | GO_NEUROTRANSMI   | 111 | -0.3992 | -1.3912 | 0.0611 | 0.388255 | 1     | 14144 | tags=41%, list=2. |
| GO_REGUL  | GO_REGULATION_OF  | 140 | -0.33   | -1.3484 | 0.0613 | 0.407119 | 1     | 11011 | tags=32%, list=1' |
| GO_REGUL  | GO_REGULATION_OF  | 25  | -0.5888 | -1.4406 | 0.0615 | 0.380502 | 1     | 8836  | tags=56%, list=1. |
| GO_FOREL  | GO_FORELIMB_MOR   | 40  | -0.4591 | -1.4855 | 0.0615 | 0.3715   | 0.999 | 8338  | tags=43%, list=1. |
| GO_CARDI  | GO_CARDIAC_MUSC   | 72  | -0.4156 | -1.4367 | 0.0615 | 0.385474 | 1     | 11874 | tags=38%, list=2  |
| GO_PEPTID | GO_PEPTIDYL_LYSIN | 21  | -0.5537 | -1.5049 | 0.0615 | 0.373543 | 0.999 | 11713 | tags=57%, list=2  |
| GO_ACTIV  | GO_ACTIVATION_OF  | 34  | -0.4219 | -1.4151 | 0.0619 | 0.383429 | 1     | 12950 | tags=44%, list=2  |
| GO_GROW   | GO_GROWTH_HORM    | 15  | -0.5608 | -1.4861 | 0.0621 | 0.371116 | 0.999 | 15233 | tags=53%, list=2  |
| GO_NEGAT  | GO_NEGATIVE_REGU  | 25  | -0.5007 | -1.4712 | 0.0621 | 0.374947 | 0.999 | 8290  | tags=48%, list=1. |
| GO_MORPH  | GO_MORPHOGENESI   | 201 | -0.3661 | -1.4357 | 0.0625 | 0.384466 | 1     | 11180 | tags=35%, list=1' |
| GO_NEPHR  | GO_NEPHRON_MORF   | 77  | -0.3849 | -1.4097 | 0.0625 | 0.383255 | 1     | 5634  | tags=27%, list=1' |
| GO_RESPO  | GO_RESPONSE_TO_P  | 21  | -0.5406 | -1.5428 | 0.0626 | 0.379788 | 0.996 | 10708 | tags=43%, list=1  |
| GO_RIBON  | GO_RIBONUCLEOTID  | 31  | -0.428  | -1.4196 | 0.0628 | 0.38349  | 1     | 3557  | tags=29%, list=6  |
| GO_MULTIC | GO_MULTICELLULAR  | 204 | -0.3795 | -1.416  | 0.0629 | 0.384353 | 1     | 12152 | tags=36%, list=2  |
| GO_LABYR  | GO_LABYRINTHINE_  | 48  | -0.3946 | -1.4019 | 0.0633 | 0.383377 | 1     | 10234 | tags=40%, list=1  |
| GO_MUSCL  | GO_MUSCLE_TISSUE  | 401 | -0.3446 | -1.3971 | 0.0634 | 0.385164 | 1     | 11823 | tags=34%, list=2  |
| GO_CELL_M | GO_CELL_MIGRATIO  | 15  | -0.5459 | -1.488  | 0.0634 | 0.371032 | 0.999 | 14016 | tags=60%, list=2. |
| GO_ATP_DI | GO_ATP_DEPENDEN   | 34  | -0.5199 | -1.5146 | 0.0637 | 0.377856 | 0.999 | 14495 | tags=56%, list=2. |
| GO_CONNE  | GO_CONNECTIVE_TI  | 248 | -0.389  | -1.4753 | 0.0637 | 0.377439 | 0.999 | 12749 | tags=38%, list=2  |
| GO_VOLTA  | GO_VOLTAGE_GATE   | 43  | -0.4724 | -1.4505 | 0.0637 | 0.387798 | 1     | 19511 | tags=58%, list=3  |
| GO_POSITI | GO_POSITIVE_REGUL | 36  | -0.4401 | -1.4886 | 0.0638 | 0.370722 | 0.999 | 5634  | tags=31%, list=1' |
| GO_REGUL  | GO_REGULATION_OF  | 193 | -0.3661 | -1.4111 | 0.0638 | 0.385139 | 1     | 9235  | tags=32%, list=1' |
| GO_STRIAT | GO_STRIATED_MUSC  | 81  | -0.384  | -1.445  | 0.0641 | 0.379912 | 1     | 9641  | tags=33%, list=1' |
| GO_INHIBI | GO_INHIBITORY_SY  | 17  | -0.5879 | -1.5309 | 0.0641 | 0.389078 | 0.996 | 13278 | tags=59%, list=2  |
| GO_LYSINE | GO_LYSINE_N_METH  | 49  | -0.4994 | -1.5151 | 0.0643 | 0.379201 | 0.999 | 12102 | tags=43%, list=2  |
| GO_BRAIN  | GO_BRAIN_MORPHO   | 34  | -0.4679 | -1.469  | 0.0644 | 0.375159 | 0.999 | 10943 | tags=29%, list=1' |
| GO_ATPASI | GO_ATPASE_DEPEN   | 24  | -0.4809 | -1.461  | 0.0646 | 0.384542 | 0.999 | 13692 | tags=54%, list=2  |
| GO_MULTIC | GO_MULTICELLULAR  | 146 | -0.3508 | -1.3982 | 0.0646 | 0.386283 | 1     | 8409  | tags=27%, list=1. |
| GO_ISOPRE | GO_ISOPRENOID_BIC | 27  | -0.5028 | -1.4878 | 0.0648 | 0.37044  | 0.999 | 14556 | tags=52%, list=2. |
| GO_INTRIN | GO_INTRINSIC_COM  | 82  | -0.4441 | -1.4494 | 0.0649 | 0.38763  | 1     | 20073 | tags=62%, list=3. |
| GO_REGUL  | GO_REGULATION_OF  | 25  | -0.4928 | -1.4604 | 0.066  | 0.384053 | 0.999 | 8024  | tags=48%, list=1. |

|           |                   |     |         |         |        |          |       |       |                  |
|-----------|-------------------|-----|---------|---------|--------|----------|-------|-------|------------------|
| GO_POSIT  | GO_POSITIVE_REGUL | 21  | -0.504  | -1.4496 | 0.0661 | 0.387963 | 1     | 15503 | tags=62%, list=2 |
| GO_EPITHE | GO_EPITHELIAL_TUE | 330 | -0.3251 | -1.3616 | 0.0661 | 0.396974 | 1     | 12794 | tags=36%, list=2 |
| GO_NEGAT  | GO_NEGATIVE_REGU  | 113 | -0.3366 | -1.3492 | 0.0664 | 0.406662 | 1     | 9340  | tags=30%, list=1 |
| GO_DEVEL  | GO_DEVELOPMENTA   | 233 | -0.3597 | -1.4053 | 0.0668 | 0.38273  | 1     | 13067 | tags=37%, list=2 |
| GO_REGUL  | GO_REGULATION_OI  | 56  | -0.395  | -1.4106 | 0.0668 | 0.384805 | 1     | 8265  | tags=27%, list=1 |
| GO_EMBRY  | GO_EMBRYO_IMPLA   | 55  | -0.3774 | -1.4092 | 0.0671 | 0.383574 | 1     | 9127  | tags=33%, list=1 |
| GO_SPERM  | GO_SPERM_MOTILIT  | 89  | -0.3677 | -1.3896 | 0.0672 | 0.39021  | 1     | 15680 | tags=42%, list=2 |
| GO_CELL_I | GO_CELL_PROLIFER  | 18  | -0.5418 | -1.4862 | 0.0674 | 0.371899 | 0.999 | 15096 | tags=50%, list=2 |
| GO_NEGAT  | GO_NEGATIVE_REGU  | 28  | -0.4693 | -1.4523 | 0.0675 | 0.388328 | 1     | 7280  | tags=36%, list=1 |
| GO_AORTIC | GO_AORTIC_VALVE_  | 32  | -0.5374 | -1.5168 | 0.0675 | 0.379001 | 0.998 | 11808 | tags=59%, list=2 |
| GO_NEGAT  | GO_NEGATIVE_REGU  | 19  | -0.5139 | -1.4606 | 0.0677 | 0.384498 | 0.999 | 9127  | tags=32%, list=1 |
| GO_GASTR  | GO_GASTRULATION_  | 26  | -0.4845 | -1.4738 | 0.0679 | 0.376752 | 0.999 | 20508 | tags=73%, list=3 |
| GO_GLUTA  | GO_Glutamate_SE   | 44  | -0.4431 | -1.4473 | 0.0679 | 0.383545 | 1     | 16390 | tags=55%, list=2 |
| GO_CELL_( | GO_CELL_CELL_CON  | 70  | -0.3954 | -1.4138 | 0.0681 | 0.383897 | 1     | 8909  | tags=36%, list=1 |
| GO_HEMOC  | GO_HEMOGLOBIN_M   | 15  | -0.4966 | -1.4406 | 0.0682 | 0.381258 | 1     | 19350 | tags=60%, list=3 |
| GO_APPEN  | GO_APPENDAGE_DE   | 176 | -0.3824 | -1.4342 | 0.0683 | 0.383527 | 1     | 8807  | tags=32%, list=1 |
| GO_FIBRO  | GO_FIBROBLAST_GR  | 25  | -0.5702 | -1.5085 | 0.0683 | 0.373294 | 0.999 | 12526 | tags=56%, list=2 |
| GO_PROTE  | GO_PROTEIN_KINAS  | 50  | -0.4425 | -1.4934 | 0.0684 | 0.370324 | 0.999 | 8881  | tags=42%, list=1 |
| GO_CEREB  | GO_CEREBELLAR_CC  | 47  | -0.489  | -1.5359 | 0.0685 | 0.385196 | 0.996 | 11744 | tags=47%, list=2 |
| GO_POST_  | GO_POST_ANAL_TAI  | 18  | -0.5004 | -1.5003 | 0.0688 | 0.370641 | 0.999 | 6069  | tags=33%, list=1 |
| GO_CELLU  | GO_CELLULAR_COM   | 108 | -0.4114 | -1.4513 | 0.069  | 0.389672 | 1     | 13249 | tags=41%, list=2 |
| GO_POSTS  | GO_POSTSYNAPTIC_  | 40  | -0.4504 | -1.4488 | 0.069  | 0.385481 | 1     | 8836  | tags=38%, list=1 |
| GO_NEGAT  | GO_NEGATIVE_REGU  | 52  | -0.4068 | -1.4324 | 0.069  | 0.38571  | 1     | 8882  | tags=42%, list=1 |
| GO_CARDI  | GO_CARDIAC_MUSC   | 73  | -0.403  | -1.3876 | 0.0692 | 0.391757 | 1     | 10232 | tags=34%, list=1 |
| GO_NEGAT  | GO_NEGATIVE_REGU  | 38  | -0.4211 | -1.4037 | 0.0693 | 0.381763 | 1     | 5704  | tags=29%, list=1 |
| GO_GLUTA  | GO_GlutamateRGI   | 351 | -0.3705 | -1.4054 | 0.0696 | 0.383122 | 1     | 11851 | tags=39%, list=2 |
| GO_NEURC  | GO_NEUROTRANSMI   | 18  | -0.5081 | -1.4654 | 0.0698 | 0.379589 | 0.999 | 18087 | tags=56%, list=3 |
| GO_REGUL  | GO_REGULATION_OI  | 55  | -0.3844 | -1.3715 | 0.0703 | 0.395797 | 1     | 10655 | tags=36%, list=1 |
| GO_REGUL  | GO_REGULATION_OI  | 65  | -0.3723 | -1.3631 | 0.0703 | 0.396308 | 1     | 10655 | tags=35%, list=1 |
| GO_POTAS  | GO_POTASSIUM_ION  | 29  | -0.4507 | -1.3854 | 0.0707 | 0.392298 | 1     | 15498 | tags=59%, list=2 |
| GO_POSIT  | GO_POSITIVE_REGUL | 19  | -0.5221 | -1.4562 | 0.0713 | 0.387069 | 1     | 6062  | tags=32%, list=1 |
| GO_REGUL  | GO_REGULATION_OI  | 445 | -0.3654 | -1.4151 | 0.0714 | 0.383964 | 1     | 9470  | tags=32%, list=1 |
| GO_AUTON  | GO_AUTONOMIC_NE   | 47  | -0.4302 | -1.4102 | 0.0714 | 0.384342 | 1     | 9908  | tags=38%, list=1 |
| GO_NEURA  | GO_NEURAL_TUBE_I  | 41  | -0.4696 | -1.5004 | 0.0716 | 0.373541 | 0.999 | 8640  | tags=34%, list=1 |
| GO_POSIT  | GO_POSITIVE_REGUL | 33  | -0.4362 | -1.4215 | 0.0717 | 0.385421 | 1     | 13311 | tags=45%, list=2 |
| GO_TRANS  | GO_TRANSLATION_P  | 18  | -0.6051 | -1.4727 | 0.0719 | 0.378255 | 0.999 | 5882  | tags=39%, list=1 |
| GO_ESTAB  | GO_ESTABLISHMEN   | 15  | -0.5506 | -1.4932 | 0.0721 | 0.369596 | 0.999 | 10943 | tags=47%, list=1 |
| GO_PROTE  | GO_PROTEIN_LOCAL  | 101 | -0.4049 | -1.4426 | 0.0724 | 0.379412 | 1     | 8159  | tags=32%, list=1 |
| GO_EAR_D  | GO_EAR_DEVELOPM   | 218 | -0.3625 | -1.3433 | 0.0738 | 0.407105 | 1     | 16463 | tags=45%, list=2 |
| GO_LIPOPR | GO_LIPOPROTEIN_LC | 18  | -0.4756 | -1.4469 | 0.074  | 0.38187  | 1     | 7351  | tags=28%, list=1 |
| GO_ORGAN  | GO_ORGANIC_ACID_  | 30  | -0.4371 | -1.3846 | 0.0741 | 0.392047 | 1     | 16260 | tags=50%, list=2 |
| GO_REGUL  | GO_REGULATION_OI  | 39  | -0.4094 | -1.3891 | 0.0744 | 0.390008 | 1     | 6939  | tags=28%, list=1 |
| GO_CELL_I | GO_CELL_PROLIFER  | 16  | -0.5151 | -1.4293 | 0.0746 | 0.390698 | 1     | 8815  | tags=38%, list=1 |
| GO_OSTEO  | GO_OSTEOBLAST_DI  | 220 | -0.3476 | -1.4201 | 0.0746 | 0.383872 | 1     | 12059 | tags=37%, list=2 |
| GO_NEGAT  | GO_NEGATIVE_REGU  | 62  | -0.3558 | -1.3616 | 0.0746 | 0.396455 | 1     | 7285  | tags=27%, list=1 |
| GO_PHOSPI | GO_PHOSPHATASE_F  | 96  | -0.3448 | -1.398  | 0.075  | 0.386003 | 1     | 15207 | tags=42%, list=2 |
| GO_NEURC  | GO_NEUROTRANSMI   | 30  | -0.4309 | -1.3936 | 0.0757 | 0.38771  | 1     | 19243 | tags=50%, list=3 |
| GO_RESPO  | GO_RESPONSE_TO_P  | 32  | -0.4444 | -1.4274 | 0.0757 | 0.390816 | 1     | 3744  | tags=25%, list=6 |
| GO_ENERG  | GO_ENERGY_RESER   | 81  | -0.3552 | -1.3572 | 0.0758 | 0.399142 | 1     | 13436 | tags=40%, list=2 |
| GO_NEGAT  | GO_NEGATIVE_REGU  | 150 | -0.3468 | -1.363  | 0.076  | 0.395489 | 1     | 8823  | tags=33%, list=1 |
| GO_RESPO  | GO_RESPONSE_TO_V  | 15  | -0.5425 | -1.4489 | 0.0761 | 0.386283 | 1     | 7165  | tags=27%, list=1 |
| GO_CELL_( | GO_CELL_CELL_JUN  | 143 | -0.351  | -1.3822 | 0.0762 | 0.391423 | 1     | 12361 | tags=36%, list=2 |
| GO_DIENCI | GO_DIENCEPHALON_  | 74  | -0.396  | -1.3753 | 0.0768 | 0.396681 | 1     | 20089 | tags=55%, list=3 |
| GO_MAMM   | GO_MAMMARY_GLA    | 17  | -0.4696 | -1.4234 | 0.0769 | 0.386786 | 1     | 6439  | tags=35%, list=1 |
| GO_NUCLE  | GO_NUCLEAR_MIGR   | 23  | -0.5572 | -1.4668 | 0.0771 | 0.378295 | 0.999 | 14756 | tags=57%, list=2 |
| GO_NEURC  | GO_NEUROTRANSMI   | 51  | -0.4875 | -1.422  | 0.0771 | 0.385076 | 1     | 23857 | tags=76%, list=4 |
| GO_SODIU  | GO_SODIUM_ION_HC  | 52  | -0.3909 | -1.3606 | 0.0774 | 0.396723 | 1     | 14980 | tags=44%, list=2 |
| GO_PHOSPI | GO_PHOSPHATIDIC_  | 49  | -0.3676 | -1.3495 | 0.0775 | 0.406651 | 1     | 10781 | tags=33%, list=1 |



|           |                   |     |         |         |        |          |       |       |                  |
|-----------|-------------------|-----|---------|---------|--------|----------|-------|-------|------------------|
| GO_NITRIC | GO_NITRIC_OXIDE_M | 27  | -0.4808 | -1.408  | 0.0779 | 0.382723 | 1     | 3576  | tags=26%, list=6 |
| GO_REGUL  | GO_REGULATION_OF  | 26  | -0.4708 | -1.4224 | 0.078  | 0.385836 | 1     | 12067 | tags=38%, list=2 |
| GO_ACTION | GO_ACTION_POTENTI | 136 | -0.3718 | -1.3798 | 0.078  | 0.394985 | 1     | 10232 | tags=33%, list=1 |
| GO_MESOD  | GO_MESODERM_DEV   | 131 | -0.3254 | -1.323  | 0.0781 | 0.409346 | 1     | 10951 | tags=34%, list=1 |
| GO_ION_TR | GO_ION_TRANSMEM   | 33  | -0.439  | -1.4066 | 0.0786 | 0.382805 | 1     | 12241 | tags=48%, list=2 |
| GO_POSITI | GO_POSITIVE_REGUL | 27  | -0.5002 | -1.4717 | 0.0787 | 0.377673 | 0.999 | 8426  | tags=33%, list=1 |
| GO_CELL_C | GO_CELL_CELL_JUN  | 199 | -0.3354 | -1.3591 | 0.0788 | 0.397882 | 1     | 13008 | tags=36%, list=2 |
| GO_SENSO  | GO_SENSORY_ORGA   | 265 | -0.3325 | -1.3371 | 0.0788 | 0.407252 | 1     | 14688 | tags=40%, list=2 |
| GO_EMBRY  | GO_EMBRYONIC_OR   | 299 | -0.3386 | -1.363  | 0.079  | 0.395989 | 1     | 12111 | tags=33%, list=2 |
| GO_PRESY  | GO_PRESYNAPSE_OF  | 53  | -0.4379 | -1.4186 | 0.0792 | 0.383418 | 1     | 10943 | tags=42%, list=1 |
| GO_RESPO  | GO_RESPONSE_TO_N  | 52  | -0.4446 | -1.4529 | 0.0793 | 0.38892  | 1     | 7870  | tags=38%, list=1 |
| GO_CELL_I | GO_CELL_DIFFEREN  | 57  | -0.4249 | -1.3971 | 0.0797 | 0.384563 | 1     | 16459 | tags=44%, list=2 |
| GO_SMOOT  | GO_SMOOTHENED_S   | 135 | -0.403  | -1.4471 | 0.0806 | 0.382305 | 1     | 10490 | tags=35%, list=1 |
| GO_CELL_J | GO_CELL_JUNCTION  | 422 | -0.3298 | -1.3638 | 0.081  | 0.397257 | 1     | 11122 | tags=33%, list=1 |
| GO_EMBRY  | GO_EMBRYONIC_CA   | 39  | -0.4535 | -1.4626 | 0.0811 | 0.383896 | 0.999 | 10943 | tags=46%, list=1 |
| GO_TRANS  | GO_TRANSMEMBRAI   | 353 | -0.3239 | -1.3551 | 0.0812 | 0.400012 | 1     | 12361 | tags=34%, list=2 |
| GO_PERIK  | GO_PERIKARYON     | 153 | -0.3915 | -1.4173 | 0.0813 | 0.38473  | 1     | 17048 | tags=52%, list=2 |
| GO_NEGAT  | GO_NEGATIVE_REGU  | 176 | -0.3419 | -1.3609 | 0.0813 | 0.396661 | 1     | 17271 | tags=44%, list=3 |
| GO_NEURC  | GO_NEURON_PROJEC  | 37  | -0.4273 | -1.4432 | 0.0815 | 0.379714 | 1     | 11227 | tags=49%, list=1 |
| GO_9PLUS2 | GO_9PLUS2_MOTILE  | 105 | -0.3483 | -1.3594 | 0.0817 | 0.397908 | 1     | 15284 | tags=38%, list=2 |
| GO_BASEM  | GO_BASEMENT_MEM   | 102 | -0.4546 | -1.4942 | 0.0818 | 0.370542 | 0.999 | 6867  | tags=38%, list=1 |
| GO_REGUL  | GO_REGULATION_OF  | 184 | -0.3681 | -1.3926 | 0.0824 | 0.38852  | 1     | 11792 | tags=35%, list=2 |
| GO_T_TUBI | GO_T_TUBULE       | 52  | -0.4269 | -1.413  | 0.0828 | 0.384159 | 1     | 8909  | tags=40%, list=1 |
| GO_POSITI | GO_POSITIVE_REGUL | 20  | -0.5216 | -1.4246 | 0.0832 | 0.389044 | 1     | 7379  | tags=35%, list=1 |
| GO_CHEMI  | GO_CHEMICAL_SYN   | 110 | -0.4163 | -1.412  | 0.0833 | 0.384729 | 1     | 10937 | tags=39%, list=1 |
| GO_TAU_PI | GO_TAU_PROTEIN_B  | 45  | -0.4442 | -1.4184 | 0.0835 | 0.383064 | 1     | 6486  | tags=31%, list=1 |
| GO_EPITHE | GO_EPITHELIAL_CEL | 47  | -0.4426 | -1.4082 | 0.0838 | 0.383732 | 1     | 6716  | tags=32%, list=1 |
| GO_POSITI | GO_POSITIVE_REGUL | 17  | -0.5645 | -1.4509 | 0.0841 | 0.388884 | 1     | 7201  | tags=41%, list=1 |
| GO_POSITI | GO_POSITIVE_REGUL | 40  | -0.4291 | -1.4186 | 0.0843 | 0.384105 | 1     | 12950 | tags=38%, list=2 |
| GO_NEURC  | GO_NEURON_SPINE   | 175 | -0.3541 | -1.3307 | 0.0845 | 0.408975 | 1     | 15095 | tags=47%, list=2 |
| GO_NEURC  | GO_NEURONAL_STE   | 23  | -0.4977 | -1.4099 | 0.0845 | 0.383596 | 1     | 8726  | tags=30%, list=1 |
| GO_REGUL  | GO_REGULATION_OF  | 16  | -0.5696 | -1.4571 | 0.0847 | 0.386921 | 1     | 16720 | tags=69%, list=2 |
| GO_REGUL  | GO_REGULATION_OF  | 431 | -0.3405 | -1.3482 | 0.0848 | 0.406854 | 1     | 11031 | tags=33%, list=1 |
| GO_EMBRY  | GO_EMBRYONIC_SK   | 15  | -0.5167 | -1.417  | 0.0849 | 0.384518 | 1     | 8338  | tags=47%, list=1 |
| GO_COCHL  | GO_COCHLEA_MORF   | 24  | -0.4634 | -1.4286 | 0.0849 | 0.390509 | 1     | 10943 | tags=38%, list=1 |
| GO_NEGAT  | GO_NEGATIVE_REGU  | 44  | -0.4027 | -1.3961 | 0.0851 | 0.385246 | 1     | 10299 | tags=34%, list=1 |
| GO_REGUL  | GO_REGULATION_OF  | 165 | -0.2927 | -1.2499 | 0.0853 | 0.429732 | 1     | 11816 | tags=29%, list=2 |
| GO_ATRIAI | GO_ATRIAL_CARDIA  | 20  | -0.5158 | -1.4323 | 0.0855 | 0.385091 | 1     | 15888 | tags=65%, list=2 |
| GO_CYCLA  | GO_CYCLASE_ACTIV  | 18  | -0.5184 | -1.4273 | 0.0855 | 0.390249 | 1     | 23618 | tags=83%, list=4 |
| GO_POSITI | GO_POSITIVE_REGUL | 71  | -0.3619 | -1.3544 | 0.0855 | 0.400308 | 1     | 11011 | tags=31%, list=1 |
| GO_REGUL  | GO_REGULATION_OF  | 34  | -0.3963 | -1.3241 | 0.0856 | 0.411509 | 1     | 21540 | tags=62%, list=3 |
| GO_CUL3_F | GO_CUL3_RING_UBI  | 36  | -0.4528 | -1.4243 | 0.0861 | 0.388813 | 1     | 3635  | tags=25%, list=6 |
| GO_DIVALI | GO_DIVALENT_INOR  | 161 | -0.3459 | -1.3404 | 0.0862 | 0.407291 | 1     | 16273 | tags=44%, list=2 |
| GO_REGUL  | GO_REGULATION_OF  | 171 | -0.3348 | -1.3202 | 0.0862 | 0.408888 | 1     | 8089  | tags=29%, list=1 |
| GO_POSITI | GO_POSITIVE_REGUL | 25  | -0.4715 | -1.4525 | 0.0864 | 0.388668 | 1     | 4739  | tags=36%, list=8 |
| GO_POSITI | GO_POSITIVE_REGUL | 28  | -0.5246 | -1.4448 | 0.0866 | 0.379715 | 1     | 7648  | tags=43%, list=1 |
| GO_NEURC  | GO_NEUROMUSCUL    | 50  | -0.4548 | -1.3892 | 0.0867 | 0.390439 | 1     | 16273 | tags=60%, list=2 |
| GO_VOLTA  | GO_VOLTAGE_GATE   | 138 | -0.4182 | -1.3992 | 0.0869 | 0.38615  | 1     | 19616 | tags=55%, list=3 |
| GO_REGUL  | GO_REGULATION_OF  | 154 | -0.3512 | -1.3632 | 0.087  | 0.396835 | 1     | 11361 | tags=34%, list=1 |
| GO_EPITHE | GO_EPITHELIAL_TO  | 17  | -0.5906 | -1.481  | 0.0871 | 0.374561 | 0.999 | 8882  | tags=41%, list=1 |
| GO_9PLUS  | GO_9PLUS0_NON_MC  | 132 | -0.3447 | -1.324  | 0.0876 | 0.411203 | 1     | 19648 | tags=47%, list=3 |
| GO_AXON_  | GO_AXON_EXTENSIC  | 122 | -0.3914 | -1.3881 | 0.0876 | 0.39126  | 1     | 15894 | tags=47%, list=2 |
| GO_GLUTA  | GO_GlutAMINE_ME   | 21  | -0.52   | -1.4247 | 0.0877 | 0.389612 | 1     | 13876 | tags=57%, list=2 |
| GO_CEREB  | GO_CEREBELLAR_C   | 23  | -0.5217 | -1.459  | 0.0878 | 0.383576 | 1     | 13615 | tags=52%, list=2 |
| GO_NEURC  | GO_NEURON_CELL_C  | 17  | -0.5662 | -1.4494 | 0.0888 | 0.386871 | 1     | 9300  | tags=53%, list=1 |
| GO_NEURC  | GO_NEUROPEPTIDE   | 105 | -0.3691 | -1.3416 | 0.0888 | 0.408069 | 1     | 15095 | tags=43%, list=2 |
| GO_MOTOF  | GO_MOTOR_ACTIVITI | 132 | -0.3951 | -1.4045 | 0.0888 | 0.383573 | 1     | 14648 | tags=44%, list=2 |
| GO_EMBRY  | GO_EMBRYONIC_OR   | 447 | -0.3181 | -1.3381 | 0.0888 | 0.407406 | 1     | 10951 | tags=31%, list=1 |

|            |                   |     |         |         |        |          |       |       |                  |
|------------|-------------------|-----|---------|---------|--------|----------|-------|-------|------------------|
| GO_BLASTO  | GO_BLASTODERM_S   | 19  | -0.4315 | -1.3349 | 0.0889 | 0.406741 | 1     | 12828 | tags=47%, list=2 |
| GO_NEGAT   | GO_NEGATIVE_REGU  | 30  | -0.4768 | -1.3791 | 0.0894 | 0.393949 | 1     | 17412 | tags=43%, list=3 |
| GO_VENTR   | GO_VENTRAL_SPINA  | 49  | -0.4377 | -1.4008 | 0.0898 | 0.384771 | 1     | 7336  | tags=29%, list=1 |
| GO_SMOOT   | GO_SMOOTH_MUSCI   | 108 | -0.4214 | -1.4133 | 0.0898 | 0.384144 | 1     | 10853 | tags=42%, list=1 |
| GO_REPLA   | GO_REPLACEMENT_I  | 28  | -0.4923 | -1.436  | 0.0898 | 0.38535  | 1     | 10188 | tags=43%, list=1 |
| GO_REGUL   | GO_REGULATION_OI  | 82  | -0.4182 | -1.4344 | 0.0899 | 0.385454 | 1     | 13137 | tags=41%, list=2 |
| GO_ADREN   | GO_ADRENERGIC_RI  | 19  | -0.489  | -1.4453 | 0.09   | 0.380258 | 1     | 7522  | tags=37%, list=1 |
| GO_BRANC   | GO_BRANCHING_INV  | 36  | -0.4977 | -1.5109 | 0.0904 | 0.37464  | 0.999 | 9208  | tags=44%, list=1 |
| GO_BASOL   | GO_BASOLATERAL_I  | 244 | -0.3065 | -1.2835 | 0.0904 | 0.421631 | 1     | 10205 | tags=30%, list=1 |
| GO_LOCOM   | GO_LOCOMOTOR_RI   | 15  | -0.4991 | -1.3977 | 0.0906 | 0.385963 | 1     | 10462 | tags=47%, list=1 |
| GO_ZINC_I  | GO_ZINC_ION_TRAN  | 27  | -0.4941 | -1.4439 | 0.0907 | 0.379839 | 1     | 16073 | tags=56%, list=2 |
| GO_PROST   | GO_PROSTATE_GLA   | 49  | -0.3855 | -1.3543 | 0.0907 | 0.399829 | 1     | 7643  | tags=29%, list=1 |
| GO_VITAM   | GO_VITAMIN_TRANS  | 17  | -0.5002 | -1.3965 | 0.0907 | 0.384993 | 1     | 14640 | tags=47%, list=2 |
| GO_BONE_I  | GO_BONE_GROWTH    | 31  | -0.4565 | -1.4253 | 0.0911 | 0.390438 | 1     | 14016 | tags=48%, list=2 |
| GO_MUSCL   | GO_MUSCLE_CELL_I  | 372 | -0.3331 | -1.3447 | 0.0914 | 0.407115 | 1     | 11823 | tags=33%, list=2 |
| GO_SEMI_I  | GO_SEMI_LUNAR_VI  | 37  | -0.5055 | -1.4537 | 0.0917 | 0.389715 | 1     | 11808 | tags=54%, list=2 |
| GO_NEGAT   | GO_NEGATIVE_CHEM  | 47  | -0.4056 | -1.3842 | 0.0918 | 0.39165  | 1     | 11227 | tags=40%, list=1 |
| GO_BRANC   | GO_BRANCH_ELONG   | 19  | -0.5119 | -1.4209 | 0.092  | 0.386047 | 1     | 10943 | tags=42%, list=1 |
| GO_SKELE   | GO_SKELETAL_SYST  | 222 | -0.3525 | -1.3588 | 0.092  | 0.397313 | 1     | 16549 | tags=46%, list=2 |
| GO_CELLU   | GO_CELLULAR_AMIN  | 81  | -0.3598 | -1.3313 | 0.0923 | 0.409498 | 1     | 7085  | tags=23%, list=1 |
| GO_LABYR   | GO_LABYRINTHINE_I | 20  | -0.4797 | -1.4238 | 0.0925 | 0.388303 | 1     | 10234 | tags=45%, list=1 |
| GO_NEGAT   | GO_NEGATIVE_REGU  | 134 | -0.348  | -1.3486 | 0.0927 | 0.407131 | 1     | 16193 | tags=41%, list=2 |
| GO_NEURC   | GO_NEURON_PROJE   | 281 | -0.3579 | -1.366  | 0.0927 | 0.398715 | 1     | 11227 | tags=35%, list=1 |
| GO_CEREB   | GO_CEREBRAL_COR   | 29  | -0.4613 | -1.4113 | 0.093  | 0.385576 | 1     | 18320 | tags=55%, list=3 |
| GO_LEARN   | GO_LEARNING       | 141 | -0.3815 | -1.3678 | 0.093  | 0.397925 | 1     | 9704  | tags=33%, list=1 |
| GO_POSIT   | GO_POSITIVE_REGUI | 84  | -0.3773 | -1.4039 | 0.0931 | 0.382084 | 1     | 12976 | tags=40%, list=2 |
| GO_REGUL   | GO_REGULATION_OI  | 49  | -0.4188 | -1.399  | 0.0932 | 0.385931 | 1     | 7579  | tags=33%, list=1 |
| GO_INTERC  | GO_INTERCALATED_I | 51  | -0.4104 | -1.3742 | 0.0933 | 0.397743 | 1     | 8909  | tags=37%, list=1 |
| GO_NEURC   | GO_NEUROTROPHIN   | 33  | -0.4169 | -1.3564 | 0.0936 | 0.399713 | 1     | 7373  | tags=36%, list=1 |
| GO_POSIT   | GO_POSITIVE_REGUI | 21  | -0.4435 | -1.3787 | 0.0938 | 0.394131 | 1     | 3630  | tags=24%, list=6 |
| GO_CELLU   | GO_CELLULAR_RESE  | 91  | -0.3606 | -1.3359 | 0.0938 | 0.406921 | 1     | 10151 | tags=27%, list=1 |
| GO_REGUL   | GO_REGULATION_OI  | 21  | -0.4646 | -1.3925 | 0.094  | 0.388205 | 1     | 13442 | tags=43%, list=2 |
| GO_RECEP   | GO_RECEPTOR_SERI  | 28  | -0.4354 | -1.3939 | 0.0941 | 0.387855 | 1     | 7643  | tags=32%, list=1 |
| GO_OXIDA   | GO_OXIDATIVE_DEM  | 19  | -0.5183 | -1.4262 | 0.0945 | 0.390251 | 1     | 943   | tags=21%, list=2 |
| GO_TRIGLY  | GO_TRIGLYCERIDE_I | 29  | -0.4119 | -1.3402 | 0.0947 | 0.407112 | 1     | 9980  | tags=34%, list=1 |
| GO_POSIT   | GO_POSITIVE_REGUI | 38  | -0.4044 | -1.3549 | 0.0947 | 0.399787 | 1     | 20632 | tags=55%, list=3 |
| GO_NEURC   | GO_NEURON_PROJE   | 170 | -0.362  | -1.3459 | 0.0947 | 0.406825 | 1     | 12077 | tags=36%, list=2 |
| GO_CELLU   | GO_CELLULAR_SODI  | 18  | -0.5066 | -1.4263 | 0.0948 | 0.390676 | 1     | 14054 | tags=61%, list=2 |
| GO_POSIT   | GO_POSITIVE_REGUI | 34  | -0.4219 | -1.3915 | 0.0949 | 0.388922 | 1     | 4645  | tags=24%, list=8 |
| GO_REGUL   | GO_REGULATION_OI  | 17  | -0.4765 | -1.3791 | 0.0949 | 0.394466 | 1     | 13378 | tags=65%, list=2 |
| GO_CHLOR   | GO_CHLORIDE_TRAN  | 101 | -0.3515 | -1.3186 | 0.0951 | 0.407272 | 1     | 17190 | tags=51%, list=2 |
| GO_OVULA   | GO_OVULATION_CY   | 69  | -0.3696 | -1.3264 | 0.0954 | 0.410544 | 1     | 12962 | tags=38%, list=2 |
| GO_POTAS   | GO_POTASSIUM_CHA  | 95  | -0.4296 | -1.3854 | 0.0955 | 0.391773 | 1     | 20230 | tags=57%, list=3 |
| GO_REGIO   | GO_REGIONALIZATI  | 353 | -0.3268 | -1.3214 | 0.0956 | 0.409439 | 1     | 17335 | tags=43%, list=3 |
| GO_REGUL   | GO_REGULATION_OI  | 109 | -0.3698 | -1.3746 | 0.096  | 0.397402 | 1     | 13067 | tags=38%, list=2 |
| GO_NEGAT   | GO_NEGATIVE_REGU  | 50  | -0.4209 | -1.3858 | 0.0962 | 0.392316 | 1     | 18948 | tags=50%, list=3 |
| GO_CHONI   | GO_CHONDROCYTE_I  | 100 | -0.4073 | -1.4145 | 0.0963 | 0.383952 | 1     | 16573 | tags=46%, list=2 |
| GO_SODIU   | GO_SODIUM_CHANN   | 26  | -0.479  | -1.3716 | 0.0963 | 0.396291 | 1     | 18109 | tags=58%, list=3 |
| GO_CEREB   | GO_CEREBRAL_COR   | 40  | -0.4376 | -1.4043 | 0.0965 | 0.382509 | 1     | 18320 | tags=52%, list=3 |
| GO_ACTIN   | GO_ACTIN_FILAMEN  | 150 | -0.3794 | -1.3831 | 0.0966 | 0.390252 | 1     | 11874 | tags=35%, list=2 |
| GO_GABA    | GO_GABA_ERGIC_SY  | 72  | -0.4583 | -1.4081 | 0.097  | 0.383219 | 1     | 18359 | tags=57%, list=3 |
| GO_MUSCL   | GO_MUSCLE_CELL_F  | 19  | -0.4834 | -1.3578 | 0.0976 | 0.398606 | 1     | 20687 | tags=53%, list=3 |
| GO_IN_UTE  | GO_IN_UTERO_EMBF  | 378 | -0.3064 | -1.3232 | 0.0977 | 0.410161 | 1     | 10444 | tags=30%, list=1 |
| GO_NEGAT   | GO_NEGATIVE_REGU  | 22  | -0.4556 | -1.4041 | 0.0981 | 0.382221 | 1     | 9340  | tags=36%, list=1 |
| GO_NOTCH   | GO_NOTCH_BINDING  | 22  | -0.5085 | -1.4127 | 0.0986 | 0.384093 | 1     | 7175  | tags=41%, list=1 |
| GO_LIPID_I | GO_LIPID_EXPORT_F | 38  | -0.4028 | -1.338  | 0.0986 | 0.40714  | 1     | 9864  | tags=32%, list=1 |
| GO_CARDI   | GO_CARDIAC_EPITH  | 32  | -0.4913 | -1.4453 | 0.0987 | 0.380984 | 1     | 17220 | tags=53%, list=2 |
| GO_METAN   | GO_METANEPHRIC_C  | 16  | -0.5762 | -1.427  | 0.0988 | 0.390047 | 1     | 11652 | tags=50%, list=2 |

|           |                   |     |         |         |        |          |       |       |                  |
|-----------|-------------------|-----|---------|---------|--------|----------|-------|-------|------------------|
| GO_CENTR  | GO_CENTRAL_NERV   | 82  | -0.3998 | -1.3915 | 0.0988 | 0.388321 | 1     | 18325 | tags=54%, list=3 |
| GO_SEROT  | GO_SEROTONIN_REC  | 34  | -0.4244 | -1.3481 | 0.099  | 0.406459 | 1     | 20978 | tags=53%, list=3 |
| GO_REGUL  | GO_REGULATION_OF  | 17  | -0.5152 | -1.4226 | 0.099  | 0.386192 | 1     | 11448 | tags=53%, list=2 |
| GO_CRANI  | GO_CRANIAL_SKELE  | 68  | -0.398  | -1.3731 | 0.0992 | 0.396225 | 1     | 9854  | tags=37%, list=1 |
| GO_CARBO  | GO_CARBOHYDRATE   | 112 | -0.3426 | -1.3085 | 0.0992 | 0.410638 | 1     | 11745 | tags=34%, list=2 |
| GO_HIPPOC | GO_HIPPOCAMPUS_I  | 80  | -0.3853 | -1.3306 | 0.0994 | 0.408645 | 1     | 15403 | tags=43%, list=2 |
| GO_MAIN_  | GO_MAIN_AXON      | 68  | -0.4617 | -1.4088 | 0.0996 | 0.383161 | 1     | 14688 | tags=56%, list=2 |
| GO_ARF_G  | GO_ARF_GUANYL_N   | 18  | -0.4904 | -1.4241 | 0.0996 | 0.388422 | 1     | 12242 | tags=56%, list=2 |
| GO_ERYTH  | GO_ERYTHROCYTE_   | 33  | -0.3988 | -1.3293 | 0.0996 | 0.409548 | 1     | 5294  | tags=21%, list=9 |
| GO_DISTAL | GO_DISTAL_AXON    | 301 | -0.3735 | -1.374  | 0.1    | 0.397536 | 1     | 16005 | tags=46%, list=2 |
| GO_REGUL  | GO_REGULATION_OF  | 231 | -0.3546 | -1.3448 | 0.1    | 0.407517 | 1     | 11448 | tags=36%, list=2 |
| GO_ESTAB  | GO_ESTABLISHMEN   | 17  | -0.5065 | -1.4111 | 0.1004 | 0.384505 | 1     | 10943 | tags=41%, list=1 |
| GO_POTAS  | GO_POTASSIUM_ION  | 155 | -0.3753 | -1.336  | 0.1006 | 0.407246 | 1     | 15498 | tags=43%, list=2 |
| GO_ENDOC  | GO_ENDOCHONDRIA   | 54  | -0.428  | -1.387  | 0.1014 | 0.392201 | 1     | 16214 | tags=50%, list=2 |
| GO_REGUL  | GO_REGULATION_OF  | 25  | -0.4373 | -1.3646 | 0.1014 | 0.397398 | 1     | 5634  | tags=32%, list=1 |
| GO_POSIT  | GO_POSITIVE_REGUL | 378 | -0.3242 | -1.3276 | 0.1015 | 0.410244 | 1     | 10105 | tags=30%, list=1 |
| GO_LONG_  | GO_LONG_TERM_SY   | 31  | -0.4185 | -1.3277 | 0.1016 | 0.410513 | 1     | 11596 | tags=45%, list=2 |
| GO_CELL_  | GO_CELL_DIFFEREN  | 22  | -0.5187 | -1.4203 | 0.1017 | 0.384357 | 1     | 13955 | tags=55%, list=2 |
| GO_RESPO  | GO_RESPONSE_TO_C  | 17  | -0.4888 | -1.373  | 0.1018 | 0.395912 | 1     | 16182 | tags=59%, list=2 |
| GO_ANTER  | GO_ANTERIOR_POST  | 218 | -0.3253 | -1.3018 | 0.102  | 0.415803 | 1     | 17335 | tags=43%, list=3 |
| GO_NEGAT  | GO_NEGATIVE_REGU  | 16  | -0.5269 | -1.4237 | 0.102  | 0.387807 | 1     | 11360 | tags=31%, list=1 |
| GO_EPITHE | GO_EPITHELIAL_CEL | 35  | -0.4121 | -1.3732 | 0.1022 | 0.396537 | 1     | 10272 | tags=43%, list=1 |
| GO_PALLI  | GO_PALLIUM_DEVEI  | 166 | -0.3648 | -1.3405 | 0.1023 | 0.407545 | 1     | 15403 | tags=41%, list=2 |
| GO_AXON_  | GO_AXON_INITIAL_S | 17  | -0.5814 | -1.4362 | 0.1025 | 0.38577  | 1     | 19825 | tags=76%, list=3 |
| GO_CAVEO  | GO_CAVEOLA        | 76  | -0.3944 | -1.4029 | 0.1026 | 0.382699 | 1     | 9810  | tags=39%, list=1 |
| GO_SECON  | GO_SECONDARY_AC   | 234 | -0.2854 | -1.2341 | 0.1027 | 0.435886 | 1     | 16401 | tags=38%, list=2 |
| GO_POSTS  | GO_POSTSYNAPTIC_  | 65  | -0.4489 | -1.3661 | 0.1027 | 0.399077 | 1     | 19125 | tags=58%, list=3 |
| GO_ANATC  | GO_ANATOMICAL_S   | 18  | -0.4985 | -1.4075 | 0.1028 | 0.382923 | 1     | 10523 | tags=50%, list=1 |
| GO_G_PRO  | GO_G_PROTEIN_COU  | 50  | -0.3965 | -1.3305 | 0.1031 | 0.408222 | 1     | 19125 | tags=50%, list=3 |
| GO_EMBRY  | GO_EMBRYONIC_HE   | 70  | -0.3638 | -1.3384 | 0.1032 | 0.407934 | 1     | 12794 | tags=36%, list=2 |
| GO_NODE_  | GO_NODE_OF_RANV   | 15  | -0.5824 | -1.4358 | 0.1036 | 0.384931 | 1     | 11099 | tags=53%, list=1 |
| GO_NEGAT  | GO_NEGATIVE_REGU  | 100 | -0.3425 | -1.3134 | 0.1038 | 0.407589 | 1     | 15394 | tags=40%, list=2 |
| GO_NEURC  | GO_NEURON_MIGRA   | 159 | -0.3836 | -1.3257 | 0.1042 | 0.410947 | 1     | 20062 | tags=58%, list=3 |
| GO_NEGAT  | GO_NEGATIVE_REGU  | 33  | -0.4237 | -1.3735 | 0.1043 | 0.396568 | 1     | 8907  | tags=33%, list=1 |
| GO_NON_M  | GO_NON_MOTILE_CI  | 157 | -0.3457 | -1.3197 | 0.1043 | 0.407705 | 1     | 19648 | tags=48%, list=3 |
| GO_FOREB  | GO_FOREBRAIN_CEL  | 56  | -0.4183 | -1.385  | 0.1047 | 0.391971 | 1     | 18325 | tags=52%, list=3 |
| GO_OLFAC  | GO_OLFACTORY_LO   | 33  | -0.4658 | -1.3758 | 0.1048 | 0.396179 | 1     | 15403 | tags=58%, list=2 |
| GO_IONOT  | GO_IONOTROPIC_GL  | 28  | -0.4424 | -1.3713 | 0.105  | 0.39558  | 1     | 15082 | tags=50%, list=2 |
| GO_PROTE  | GO_PROTEIN_LOCAL  | 58  | -0.4692 | -1.4506 | 0.1051 | 0.388569 | 1     | 22739 | tags=72%, list=3 |
| GO_NEURC  | GO_NEUROTRANSMI   | 21  | -0.4775 | -1.378  | 0.1051 | 0.394266 | 1     | 8287  | tags=43%, list=1 |
| GO_EAR_M  | GO_EAR_MORPHOGE   | 121 | -0.3618 | -1.318  | 0.1051 | 0.407455 | 1     | 11779 | tags=34%, list=2 |
| GO_INTRA_ | GO_INTRA_GOLGI_V  | 33  | -0.4858 | -1.439  | 0.1052 | 0.383067 | 1     | 13882 | tags=52%, list=2 |
| GO_LENS_  | GO_LENS_DEVELOP   | 81  | -0.3436 | -1.3077 | 0.1055 | 0.411281 | 1     | 10943 | tags=32%, list=1 |
| GO_EPITHE | GO_EPITHELIAL_TUE | 29  | -0.4476 | -1.4153 | 0.1055 | 0.384397 | 1     | 6907  | tags=34%, list=1 |
| GO_GASTR  | GO_GASTRULATION   | 185 | -0.3444 | -1.3511 | 0.1059 | 0.403981 | 1     | 10951 | tags=34%, list=1 |
| GO_CELL_  | GO_CELL_CELL_SIG  | 32  | -0.4577 | -1.3994 | 0.106  | 0.386922 | 1     | 15888 | tags=53%, list=2 |
| GO_LYSINE | GO_LYSINE_ACETYL  | 22  | -0.5561 | -1.4344 | 0.1061 | 0.384713 | 1     | 4511  | tags=41%, list=8 |
| GO_STEM_  | GO_STEM_CELL_DIV  | 44  | -0.4036 | -1.3694 | 0.1061 | 0.397606 | 1     | 6459  | tags=30%, list=1 |
| GO_REGUL  | GO_REGULATION_OF  | 112 | -0.4578 | -1.4854 | 0.1066 | 0.370817 | 0.999 | 9389  | tags=39%, list=1 |
| GO_RETIN  | GO_RETINAL_BINDI  | 17  | -0.505  | -1.3589 | 0.1069 | 0.397721 | 1     | 14556 | tags=53%, list=2 |
| GO_MICRO  | GO_MICROTUBULE_   | 92  | -0.4035 | -1.4089 | 0.1069 | 0.383592 | 1     | 22421 | tags=59%, list=3 |
| GO_TONGU  | GO_TONGUE_DEVEL   | 23  | -0.4791 | -1.4199 | 0.1071 | 0.383584 | 1     | 7885  | tags=39%, list=1 |
| GO_NEGAT  | GO_NEGATIVE_REGU  | 40  | -0.3733 | -1.3163 | 0.1071 | 0.408885 | 1     | 21386 | tags=63%, list=3 |
| GO_TERPE  | GO_TERPENOID_BIO  | 15  | -0.5223 | -1.3942 | 0.1072 | 0.387896 | 1     | 14556 | tags=47%, list=2 |
| GO_NEURC  | GO_NEUROTRANSMI   | 50  | -0.4622 | -1.3676 | 0.1074 | 0.397746 | 1     | 16720 | tags=56%, list=2 |
| GO_NOTOC  | GO_NOTOCHORD_DE   | 19  | -0.4662 | -1.3921 | 0.1078 | 0.388227 | 1     | 14539 | tags=53%, list=2 |
| GO_REGUL  | GO_REGULATION_OF  | 178 | -0.3311 | -1.326  | 0.1081 | 0.410937 | 1     | 11792 | tags=33%, list=2 |
| GO_REFLE  | GO_REFLEX         | 18  | -0.5263 | -1.3706 | 0.1083 | 0.395863 | 1     | 18132 | tags=61%, list=3 |

|           |                   |     |         |         |        |          |   |       |                   |
|-----------|-------------------|-----|---------|---------|--------|----------|---|-------|-------------------|
| GO_PROTEI | GO_PROTEIN METHY  | 77  | -0.4357 | -1.4258 | 0.1085 | 0.390179 | 1 | 12102 | tags=36%, list=2  |
| GO_POSITI | GO_POSITIVE_REGUL | 208 | -0.3213 | -1.3386 | 0.1087 | 0.408071 | 1 | 8635  | tags=27%, list=1. |
| GO_DEVEL  | GO_DEVELOPMENT_   | 105 | -0.3299 | -1.2942 | 0.1088 | 0.418131 | 1 | 12664 | tags=35%, list=2  |
| GO_SPECTI | GO_SPECTRIN_BINDI | 28  | -0.456  | -1.3762 | 0.1088 | 0.396037 | 1 | 3453  | tags=29%, list=6  |
| GO_EUCHR  | GO_EUCHROMATIN    | 33  | -0.4793 | -1.4293 | 0.1092 | 0.389924 | 1 | 6062  | tags=30%, list=1  |
| GO_NEGAT  | GO_NEGATIVE_REGU  | 69  | -0.3641 | -1.3335 | 0.1094 | 0.407309 | 1 | 16473 | tags=46%, list=2  |
| GO_VENTR  | GO_VENTRICULAR_C  | 36  | -0.4187 | -1.3554 | 0.1095 | 0.400039 | 1 | 10004 | tags=36%, list=1  |
| GO_CARBO  | GO_CARBOHYDRATE   | 35  | -0.4055 | -1.341  | 0.1098 | 0.407743 | 1 | 19217 | tags=51%, list=3  |
| GO_NEGAT  | GO_NEGATIVE_REGU  | 30  | -0.4217 | -1.3679 | 0.1098 | 0.39836  | 1 | 7754  | tags=43%, list=1. |
| GO_NEGAT  | GO_NEGATIVE_REGU  | 28  | -0.4032 | -1.3436 | 0.1098 | 0.40704  | 1 | 11227 | tags=46%, list=1  |
| GO_NEGAT  | GO_NEGATIVE_REGU  | 124 | -0.3217 | -1.2775 | 0.1098 | 0.42643  | 1 | 15394 | tags=40%, list=2  |
| GO_MOTIL  | GO_MOTILE_CILIUM  | 177 | -0.3373 | -1.3569 | 0.1105 | 0.39932  | 1 | 19501 | tags=45%, list=3  |
| GO_POSITI | GO_POSITIVE_REGUL | 46  | -0.3927 | -1.3358 | 0.1105 | 0.406507 | 1 | 15888 | tags=50%, list=2  |
| GO_NEURA  | GO_NEURAL_CREST_  | 56  | -0.3857 | -1.3691 | 0.1107 | 0.397606 | 1 | 15503 | tags=50%, list=2  |
| GO_NEGAT  | GO_NEGATIVE_REGU  | 34  | -0.438  | -1.3653 | 0.1109 | 0.3973   | 1 | 7826  | tags=38%, list=1. |
| GO_CELL_  | GO_CELL_FATE_SPE  | 100 | -0.3874 | -1.3646 | 0.1116 | 0.396925 | 1 | 16459 | tags=44%, list=2  |
| GO_MAGNI  | GO_MAGNESIUM_IO   | 17  | -0.5161 | -1.3988 | 0.1116 | 0.385657 | 1 | 8736  | tags=47%, list=1. |
| GO_NEGAT  | GO_NEGATIVE_REGU  | 23  | -0.4867 | -1.3903 | 0.1118 | 0.389483 | 1 | 6062  | tags=30%, list=1  |
| GO_REGUL  | GO_REGULATION_OI  | 114 | -0.3235 | -1.306  | 0.1122 | 0.414087 | 1 | 10136 | tags=31%, list=1  |
| GO_RESPO  | GO_RESPONSE_TO_F  | 16  | -0.4739 | -1.3665 | 0.1122 | 0.398846 | 1 | 4712  | tags=31%, list=8  |
| GO_COLL   | GO_COLLATERAL_SF  | 26  | -0.4424 | -1.3634 | 0.1122 | 0.396953 | 1 | 7870  | tags=31%, list=1. |
| GO_POSITI | GO_POSITIVE_REGUL | 85  | -0.3788 | -1.3418 | 0.1124 | 0.408324 | 1 | 9996  | tags=33%, list=1  |
| GO_AXONE  | GO_AXONEME_ASSE   | 61  | -0.436  | -1.4281 | 0.1126 | 0.390913 | 1 | 15680 | tags=51%, list=2  |
| GO_VOLTA  | GO_VOLTAGE_GATE   | 17  | -0.5259 | -1.3464 | 0.1127 | 0.408239 | 1 | 16280 | tags=65%, list=2  |
| GO_REGUL  | GO_REGULATION_OI  | 46  | -0.4239 | -1.3653 | 0.1129 | 0.397741 | 1 | 6421  | tags=30%, list=1  |
| GO_MICRO  | GO_MICROTUBULE_   | 21  | -0.5127 | -1.4105 | 0.1129 | 0.384253 | 1 | 7501  | tags=33%, list=1. |
| GO_MOTIL  | GO_MOTILE_CILIUM  | 22  | -0.5194 | -1.4251 | 0.1132 | 0.390102 | 1 | 11488 | tags=45%, list=2  |
| GO_REGUL  | GO_REGULATION_OI  | 74  | -0.3384 | -1.2794 | 0.1133 | 0.425151 | 1 | 8426  | tags=27%, list=1. |
| GO_MUSCL  | GO_MUSCLE_ORGAN   | 393 | -0.3309 | -1.322  | 0.1133 | 0.409397 | 1 | 9340  | tags=30%, list=1. |
| GO_MEMBI  | GO_MEMBRANE_REF   | 47  | -0.4096 | -1.3415 | 0.1134 | 0.407106 | 1 | 15888 | tags=51%, list=2  |
| GO_MICRO  | GO_MICROTUBULE_   | 351 | -0.3577 | -1.3838 | 0.1135 | 0.390677 | 1 | 15680 | tags=40%, list=2  |
| GO_EMBRY  | GO_EMBRYONIC_DIC  | 34  | -0.468  | -1.396  | 0.1137 | 0.384827 | 1 | 5708  | tags=32%, list=1  |
| GO_SULFU  | GO_SULFUR_COMPO   | 244 | -0.3223 | -1.3164 | 0.1139 | 0.409255 | 1 | 14201 | tags=36%, list=2  |
| GO_DNA_M  | GO_DNA METHYLAT   | 20  | -0.4876 | -1.3562 | 0.1141 | 0.399463 | 1 | 16537 | tags=40%, list=2  |
| GO_REGUL  | GO_REGULATION_OI  | 24  | -0.4339 | -1.3462 | 0.1141 | 0.40752  | 1 | 6239  | tags=29%, list=1  |
| GO_REGUL  | GO_REGULATION_OI  | 24  | -0.4349 | -1.3465 | 0.1143 | 0.40845  | 1 | 3694  | tags=29%, list=6  |
| GO_POSITI | GO_POSITIVE_REGUL | 171 | -0.3576 | -1.3342 | 0.1146 | 0.406992 | 1 | 8907  | tags=31%, list=1. |
| GO_POSITI | GO_POSITIVE_REGUL | 265 | -0.3108 | -1.2868 | 0.115  | 0.419031 | 1 | 11099 | tags=31%, list=1  |
| GO_ZINC_I | GO_ZINC_ION_TRAN  | 21  | -0.5051 | -1.4063 | 0.1152 | 0.382617 | 1 | 16073 | tags=62%, list=2  |
| GO_NEGAT  | GO_NEGATIVE_REGU  | 89  | -0.3561 | -1.32   | 0.1156 | 0.408263 | 1 | 16743 | tags=45%, list=2  |
| GO_VENTR  | GO_VENTRAL_SPINA  | 17  | -0.5103 | -1.3388 | 0.1161 | 0.408178 | 1 | 16459 | tags=53%, list=2  |
| GO_CELLU  | GO_CELLULAR_RESF  | 22  | -0.4637 | -1.3721 | 0.1166 | 0.395848 | 1 | 3347  | tags=27%, list=6  |
| GO_REGUL  | GO_REGULATION_OI  | 56  | -0.3596 | -1.2943 | 0.1168 | 0.418594 | 1 | 5634  | tags=27%, list=1  |
| GO_VOLTA  | GO_VOLTAGE_GATE   | 87  | -0.4238 | -1.3557 | 0.1169 | 0.399934 | 1 | 20230 | tags=59%, list=3. |
| GO_RNA_P  | GO_RNA_POLYMER    | 61  | -0.4219 | -1.3835 | 0.117  | 0.390573 | 1 | 12598 | tags=34%, list=2  |
| GO_REGUL  | GO_REGULATION_OI  | 26  | -0.4646 | -1.3993 | 0.1171 | 0.386545 | 1 | 7826  | tags=35%, list=1. |
| GO_VOCA   | GO_VOICALIZATION_ | 19  | -0.4931 | -1.3729 | 0.1172 | 0.39543  | 1 | 9854  | tags=47%, list=1  |
| GO_CILIA  | GO_CILIARY_MEMBI  | 72  | -0.3656 | -1.3239 | 0.1172 | 0.410403 | 1 | 10493 | tags=32%, list=1. |
| GO_SARCO  | GO_SARCOLEMMA     | 132 | -0.3887 | -1.384  | 0.1176 | 0.390821 | 1 | 8909  | tags=35%, list=1. |
| GO_MEMOI  | GO_MEMORY         | 118 | -0.3508 | -1.3125 | 0.1178 | 0.407439 | 1 | 9340  | tags=35%, list=1. |
| GO_STRUC  | GO_STRUCTURAL_C   | 18  | -0.4967 | -1.3685 | 0.1182 | 0.398333 | 1 | 8159  | tags=44%, list=1. |
| GO_ACETY  | GO_ACETYL_COA_M   | 38  | -0.4326 | -1.3658 | 0.1183 | 0.398563 | 1 | 3955  | tags=21%, list=7  |
| GO_REGUL  | GO_REGULATION_OI  | 16  | -0.5337 | -1.3792 | 0.1186 | 0.395434 | 1 | 18541 | tags=63%, list=3  |
| GO_REGUL  | GO_REGULATION_OI  | 27  | -0.4723 | -1.4043 | 0.1186 | 0.383138 | 1 | 12743 | tags=48%, list=2  |
| GO_CEREB  | GO_CEREBELLAR_PU  | 15  | -0.5223 | -1.3974 | 0.119  | 0.385234 | 1 | 11744 | tags=53%, list=2  |
| GO_NEURC  | GO_NEUROPEPTIDE_  | 26  | -0.431  | -1.3201 | 0.1193 | 0.408442 | 1 | 19821 | tags=69%, list=3. |
| GO_REGUL  | GO_REGULATION_OI  | 25  | -0.4461 | -1.3655 | 0.1197 | 0.398089 | 1 | 18362 | tags=60%, list=3  |
| GO_SULFU  | GO_SULFUR_AMINO_  | 38  | -0.3965 | -1.3383 | 0.1198 | 0.40751  | 1 | 3723  | tags=18%, list=6  |

|           |                   |     |         |         |        |          |       |       |                  |
|-----------|-------------------|-----|---------|---------|--------|----------|-------|-------|------------------|
| GO_NEGAT  | GO_NEGATIVE_REGU  | 16  | -0.4584 | -1.3049 | 0.1202 | 0.414667 | 1     | 5277  | tags=25%, list=9 |
| GO_LUNG   | GO_LUNG_EPITHELI  | 37  | -0.3864 | -1.3007 | 0.1204 | 0.415164 | 1     | 17156 | tags=46%, list=2 |
| GO_NEURA  | GO_NEURAL_PRECU   | 149 | -0.358  | -1.3177 | 0.1206 | 0.40755  | 1     | 11374 | tags=34%, list=1 |
| GO_HEART  | GO_HEART_PROCES   | 290 | -0.3268 | -1.3008 | 0.1208 | 0.415961 | 1     | 12152 | tags=33%, list=2 |
| GO_CILIAR | GO_CILIARY_PLASM  | 113 | -0.4055 | -1.3834 | 0.121  | 0.390275 | 1     | 12242 | tags=38%, list=2 |
| GO_RENAL  | GO_RENAL_SYSTEM   | 28  | -0.5542 | -1.4727 | 0.1214 | 0.377461 | 0.999 | 9318  | tags=57%, list=1 |
| GO_AXOLE  | GO_AXOLEMMA       | 15  | -0.5679 | -1.3842 | 0.1215 | 0.39107  | 1     | 20089 | tags=73%, list=3 |
| GO_NEGAT  | GO_NEGATIVE_REGU  | 37  | -0.4338 | -1.3679 | 0.1215 | 0.398916 | 1     | 6847  | tags=30%, list=1 |
| GO_CILIUM | GO_CILIUM_MOVEM   | 143 | -0.3485 | -1.329  | 0.1216 | 0.409209 | 1     | 16638 | tags=39%, list=2 |
| GO_NEURC  | GO_NEUROTRANSMI   | 225 | -0.3646 | -1.354  | 0.122  | 0.400047 | 1     | 10331 | tags=35%, list=1 |
| GO_VOLTA  | GO_VOLTAGE_GATE   | 41  | -0.4302 | -1.3346 | 0.122  | 0.406778 | 1     | 10331 | tags=37%, list=1 |
| GO_POSITI | GO_POSITIVE_REGUI | 20  | -0.542  | -1.4248 | 0.122  | 0.38997  | 1     | 9721  | tags=50%, list=1 |
| GO_REGUL  | GO_REGULATION_OF  | 79  | -0.4284 | -1.4101 | 0.1221 | 0.383769 | 1     | 5882  | tags=27%, list=1 |
| GO_SPERM  | GO_SPERM_PRINCIP  | 23  | -0.4253 | -1.3255 | 0.1223 | 0.410848 | 1     | 26388 | tags=65%, list=4 |
| GO_REGUL  | GO_REGULATION_OF  | 50  | -0.3678 | -1.2921 | 0.1223 | 0.418008 | 1     | 13631 | tags=46%, list=2 |
| GO_SOLUT  | GO_SOLUTE_PROTON  | 19  | -0.4419 | -1.3293 | 0.1227 | 0.409041 | 1     | 15610 | tags=53%, list=2 |
| GO_RETIN  | GO_RETINA_LAYER_  | 25  | -0.4679 | -1.3975 | 0.1228 | 0.385588 | 1     | 12111 | tags=44%, list=2 |
| GO_TRANS  | GO_TRANSMISSION_  | 72  | -0.3969 | -1.3155 | 0.1232 | 0.408438 | 1     | 11099 | tags=38%, list=1 |
| GO_POTAS  | GO_POTASSIUM_CH   | 52  | -0.3659 | -1.2896 | 0.1233 | 0.417595 | 1     | 15888 | tags=44%, list=2 |
| GO_MESOC  | GO_MESODERMAL_C   | 18  | -0.4874 | -1.3425 | 0.1234 | 0.408138 | 1     | 9208  | tags=33%, list=1 |
| GO_EXCRE  | GO_EXCRETION      | 64  | -0.3651 | -1.2841 | 0.1235 | 0.420876 | 1     | 13846 | tags=39%, list=2 |
| GO_VITAM  | GO_VITAMIN_BINDI  | 135 | -0.3161 | -1.256  | 0.1235 | 0.42468  | 1     | 12094 | tags=30%, list=2 |
| GO_SEROT  | GO_SEROTONIN_REC  | 39  | -0.3866 | -1.2673 | 0.1238 | 0.428257 | 1     | 14144 | tags=38%, list=2 |
| GO_CARBO  | GO_CARBOHYDRATE   | 145 | -0.3221 | -1.2754 | 0.124  | 0.425499 | 1     | 11745 | tags=32%, list=2 |
| GO_NEGAT  | GO_NEGATIVE_REGU  | 73  | -0.3609 | -1.311  | 0.1241 | 0.408801 | 1     | 12556 | tags=38%, list=2 |
| GO_GOLGI  | GO_GOLGI_LUMEN    | 101 | -0.3667 | -1.2792 | 0.1245 | 0.42461  | 1     | 13137 | tags=35%, list=2 |
| GO_REGUL  | GO_REGULATION_OF  | 84  | -0.3501 | -1.2991 | 0.1252 | 0.417644 | 1     | 13913 | tags=37%, list=2 |
| GO_NEGAT  | GO_NEGATIVE_REGU  | 20  | -0.499  | -1.3869 | 0.1253 | 0.390601 | 1     | 6417  | tags=35%, list=1 |
| GO_ANION  | GO_ANION_TRANSM   | 311 | -0.2968 | -1.2514 | 0.1253 | 0.428957 | 1     | 15498 | tags=37%, list=2 |
| GO_ENDOC  | GO_ENDOCRINE_SY   | 125 | -0.329  | -1.2598 | 0.1257 | 0.424781 | 1     | 15534 | tags=43%, list=2 |
| GO_SOMAT  | GO_SOMATIC_STEM   | 75  | -0.3382 | -1.2675 | 0.1257 | 0.429042 | 1     | 7643  | tags=24%, list=1 |
| GO_DYNEI  | GO_DYNEIN_COMPL   | 53  | -0.4149 | -1.3708 | 0.126  | 0.395927 | 1     | 12302 | tags=45%, list=2 |
| GO_INTRA  | GO_INTRAMOLECUL   | 25  | -0.461  | -1.3513 | 0.126  | 0.404111 | 1     | 8903  | tags=32%, list=1 |
| GO_RETIN  | GO_RETINA_MORPH   | 59  | -0.3693 | -1.3033 | 0.1263 | 0.415457 | 1     | 7640  | tags=27%, list=1 |
| GO_NEGAT  | GO_NEGATIVE_REGU  | 18  | -0.5786 | -1.4204 | 0.1265 | 0.385594 | 1     | 8399  | tags=33%, list=1 |
| GO_REGUL  | GO_REGULATION_OF  | 98  | -0.3404 | -1.3085 | 0.1267 | 0.410241 | 1     | 4326  | tags=20%, list=7 |
| GO_REGUL  | GO_REGULATION_OF  | 29  | -0.4256 | -1.3274 | 0.1268 | 0.410138 | 1     | 18653 | tags=55%, list=3 |
| GO_MULT   | GO_MULTI_MULTICE  | 222 | -0.2831 | -1.2227 | 0.127  | 0.441841 | 1     | 9408  | tags=28%, list=1 |
| GO_NEGAT  | GO_NEGATIVE_REGU  | 96  | -0.3356 | -1.2866 | 0.127  | 0.41854  | 1     | 8823  | tags=31%, list=1 |
| GO_NEGAT  | GO_NEGATIVE_REGU  | 147 | -0.3233 | -1.2855 | 0.1274 | 0.419178 | 1     | 6421  | tags=24%, list=1 |
| GO_REGUL  | GO_REGULATION_OF  | 49  | -0.3703 | -1.3096 | 0.1274 | 0.409919 | 1     | 6716  | tags=27%, list=1 |
| GO_SKELE  | GO_SKELETAL_SYST  | 499 | -0.3165 | -1.2968 | 0.1277 | 0.417804 | 1     | 14646 | tags=37%, list=2 |
| GO_NOREP  | GO_NOREPINEPHRIN  | 25  | -0.4253 | -1.2953 | 0.1277 | 0.418866 | 1     | 5221  | tags=24%, list=9 |
| GO_ERYTH  | GO_ERYTHROCYTE_   | 15  | -0.4658 | -1.3357 | 0.1279 | 0.405747 | 1     | 3629  | tags=27%, list=6 |
| GO_SUGAR  | GO_SUGAR_TRANSM   | 23  | -0.4244 | -1.3141 | 0.128  | 0.407863 | 1     | 20436 | tags=61%, list=3 |
| GO_CELLU  | GO_CELLULAR_RESF  | 66  | -0.3418 | -1.2658 | 0.1289 | 0.426203 | 1     | 14822 | tags=44%, list=2 |
| GO_PROTE  | GO_PROTEIN_KINAS  | 26  | -0.4628 | -1.3869 | 0.129  | 0.391752 | 1     | 5615  | tags=42%, list=1 |
| GO_ORGAN  | GO_ORGANIC_HYDR   | 262 | -0.2816 | -1.2161 | 0.1292 | 0.442757 | 1     | 9450  | tags=24%, list=1 |
| GO_LATER  | GO_LATERAL_PLASM  | 64  | -0.3809 | -1.3226 | 0.1293 | 0.409286 | 1     | 9790  | tags=28%, list=1 |
| GO_POSITI | GO_POSITIVE_REGUI | 20  | -0.4587 | -1.3204 | 0.1293 | 0.409365 | 1     | 9318  | tags=40%, list=1 |
| GO_POTAS  | GO_POTASSIUM_CH   | 119 | -0.392  | -1.3219 | 0.1294 | 0.40912  | 1     | 19152 | tags=52%, list=3 |
| GO_CATEC  | GO_CATECHOLAMIN   | 55  | -0.4271 | -1.3358 | 0.1296 | 0.406127 | 1     | 11361 | tags=38%, list=1 |
| GO_SITE_O | GO_SITE_OF_POLARI | 185 | -0.3585 | -1.3234 | 0.1298 | 0.410268 | 1     | 12361 | tags=39%, list=2 |
| GO_SYNAP  | GO_SYNAPTIC_TRAN  | 94  | -0.4163 | -1.3738 | 0.13   | 0.397305 | 1     | 13615 | tags=43%, list=2 |
| GO_PEPTID | GO_PEPTIDYL_ARGII | 15  | -0.5275 | -1.3452 | 0.1306 | 0.407644 | 1     | 13934 | tags=40%, list=2 |
| GO_RHYTH  | GO_RHYTHMIC_PRO   | 301 | -0.3173 | -1.273  | 0.1306 | 0.42466  | 1     | 12274 | tags=33%, list=2 |
| GO_HORMO  | GO_HORMONE_BIND   | 82  | -0.3482 | -1.2711 | 0.1309 | 0.425033 | 1     | 13742 | tags=37%, list=2 |
| GO_POSITI | GO_POSITIVE_REGUI | 97  | -0.3488 | -1.275  | 0.1312 | 0.424565 | 1     | 9235  | tags=34%, list=1 |

|           |                   |     |         |         |        |          |   |       |                   |
|-----------|-------------------|-----|---------|---------|--------|----------|---|-------|-------------------|
| GO_E_BOX  | GO_E_BOX_BINDING  | 50  | -0.4084 | -1.3243 | 0.1313 | 0.412056 | 1 | 13688 | tags=48%, list=2  |
| GO_CELL_  | GO_CELL_COMMUNI   | 56  | -0.3858 | -1.304  | 0.1313 | 0.415033 | 1 | 10232 | tags=32%, list=1  |
| GO_PROTEI | GO_PROTEIN_CATAE  | 19  | -0.4312 | -1.3273 | 0.1316 | 0.409765 | 1 | 3754  | tags=26%, list=6  |
| GO_SARCO  | GO_SARCOPLASMIC_  | 38  | -0.4122 | -1.3197 | 0.1317 | 0.408176 | 1 | 13692 | tags=39%, list=2  |
| GO_REGUL  | GO_REGULATION_OI  | 47  | -0.4167 | -1.3638 | 0.1318 | 0.396794 | 1 | 8426  | tags=34%, list=1  |
| GO_ANATC  | GO_ANATOMICAL_S'  | 17  | -0.4564 | -1.3142 | 0.1319 | 0.407972 | 1 | 8489  | tags=47%, list=1  |
| GO_REGUL  | GO_REGULATION_OI  | 36  | -0.4442 | -1.3377 | 0.132  | 0.407183 | 1 | 10834 | tags=42%, list=1' |
| GO_KERAT  | GO_KERATAN_SULF,  | 28  | -0.4721 | -1.381  | 0.1322 | 0.393183 | 1 | 8113  | tags=36%, list=1  |
| GO_INTRAC | GO_INTRACELLULAF  | 16  | -0.4529 | -1.309  | 0.1331 | 0.410255 | 1 | 5852  | tags=44%, list=1' |
| GO_CATIO  | GO_CATION_CHANN   | 313 | -0.3365 | -1.2613 | 0.1335 | 0.424052 | 1 | 15543 | tags=41%, list=2  |
| GO_NOREP  | GO_NOREPINEPHRIN  | 17  | -0.473  | -1.3184 | 0.1336 | 0.407171 | 1 | 3846  | tags=24%, list=7  |
| GO_NEURC  | GO_NEURON_FATE_(  | 66  | -0.4249 | -1.322  | 0.1336 | 0.409776 | 1 | 16670 | tags=45%, list=2' |
| GO_DYNEI  | GO_DYNEIN_INTERM  | 29  | -0.4113 | -1.3189 | 0.1338 | 0.407184 | 1 | 13484 | tags=48%, list=2  |
| GO_POSITI | GO_POSITIVE_REGUI | 36  | -0.4339 | -1.3229 | 0.1343 | 0.409078 | 1 | 18447 | tags=53%, list=3  |
| GO_URETE  | GO_URETER_DEVELC  | 18  | -0.4515 | -1.2946 | 0.1344 | 0.418754 | 1 | 10881 | tags=33%, list=1' |
| GO_INNER_ | GO_INNER_EAR_MOI  | 101 | -0.3715 | -1.29   | 0.1345 | 0.417852 | 1 | 11779 | tags=34%, list=2  |
| GO_GATED  | GO_GATED_CHANNE   | 334 | -0.3361 | -1.2732 | 0.1348 | 0.425092 | 1 | 15543 | tags=41%, list=2  |
| GO_REGUL  | GO_REGULATION_OI  | 177 | -0.344  | -1.2694 | 0.1349 | 0.426891 | 1 | 13991 | tags=40%, list=2  |
| GO_REGUL  | GO_REGULATION_OI  | 65  | -0.385  | -1.3202 | 0.1352 | 0.409344 | 1 | 17571 | tags=46%, list=3  |
| GO_REGUL  | GO_REGULATION_OI  | 32  | -0.375  | -1.273  | 0.1354 | 0.425007 | 1 | 5959  | tags=25%, list=1' |
| GO_NEURC  | GO_NEUROBLAST_PI  | 60  | -0.3952 | -1.315  | 0.1355 | 0.408954 | 1 | 11374 | tags=37%, list=1' |
| GO_ATPASI | GO_ATPASE_COUPLI  | 57  | -0.3847 | -1.3134 | 0.1356 | 0.407202 | 1 | 12270 | tags=40%, list=2  |
| GO_BICARI | GO_BICARBONATE_]  | 43  | -0.389  | -1.2967 | 0.1358 | 0.417617 | 1 | 6264  | tags=23%, list=1  |
| GO_OSSIFI | GO_OSSIFICATION   | 394 | -0.32   | -1.3105 | 0.1358 | 0.409229 | 1 | 10490 | tags=32%, list=1  |
| GO_POSITI | GO_POSITIVE_REGUI | 60  | -0.3683 | -1.3031 | 0.1358 | 0.415287 | 1 | 16475 | tags=40%, list=2  |
| GO_REGUL  | GO_REGULATION_OI  | 115 | -0.3433 | -1.2956 | 0.1358 | 0.418722 | 1 | 9901  | tags=35%, list=1' |
| GO_VOLTA  | GO_VOLTAGE_GATE   | 195 | -0.3566 | -1.2793 | 0.1364 | 0.42498  | 1 | 19152 | tags=48%, list=3  |
| GO_DELAY  | GO_DELAYED_RECTI  | 32  | -0.4528 | -1.2895 | 0.1365 | 0.417401 | 1 | 15057 | tags=47%, list=2  |
| GO_REGUL  | GO_REGULATION_OI  | 296 | -0.3292 | -1.2876 | 0.1365 | 0.419227 | 1 | 12152 | tags=34%, list=2  |
| GO_POSITI | GO_POSITIVE_REGUI | 18  | -0.53   | -1.3769 | 0.137  | 0.395799 | 1 | 11596 | tags=44%, list=2  |
| GO_DETEC' | GO_DETECTION_OF_  | 139 | -0.3183 | -1.2296 | 0.1372 | 0.43765  | 1 | 18221 | tags=42%, list=3  |
| GO_MYOSI  | GO_MYOSIN_II_COM  | 20  | -0.5045 | -1.3444 | 0.1376 | 0.406587 | 1 | 12596 | tags=45%, list=2  |
| GO_REGUL  | GO_REGULATION_OI  | 104 | -0.3339 | -1.2881 | 0.138  | 0.419249 | 1 | 11328 | tags=32%, list=1' |
| GO_DOPAM  | GO_DOPAMINE_TRAI  | 48  | -0.4251 | -1.346  | 0.1382 | 0.407357 | 1 | 9243  | tags=38%, list=1  |
| GO_CATIO  | GO_CATION_TRANSF  | 18  | -0.4647 | -1.2898 | 0.1383 | 0.417801 | 1 | 13692 | tags=56%, list=2  |
| GO_MAINT  | GO_MAINTENANCE_]  | 16  | -0.5332 | -1.3782 | 0.1385 | 0.394532 | 1 | 16473 | tags=63%, list=2  |
| GO_CELL_  | GO_CELL_VOLUME_]  | 30  | -0.3857 | -1.2907 | 0.1387 | 0.416962 | 1 | 7472  | tags=30%, list=1  |
| GO_POSITI | GO_POSITIVE_REGUI | 42  | -0.4182 | -1.3209 | 0.1389 | 0.409533 | 1 | 13067 | tags=40%, list=2  |
| GO_REGUL  | GO_REGULATION_OI  | 231 | -0.3509 | -1.3194 | 0.1393 | 0.407207 | 1 | 10331 | tags=34%, list=1  |
| GO_TRANS  | GO_TRANSMITTER_C  | 60  | -0.421  | -1.3145 | 0.1393 | 0.408397 | 1 | 14794 | tags=50%, list=2  |
| GO_REGUL  | GO_REGULATION_OI  | 19  | -0.4351 | -1.2918 | 0.1394 | 0.4181   | 1 | 11233 | tags=42%, list=1' |
| GO_REGUL  | GO_REGULATION_OI  | 76  | -0.4579 | -1.4196 | 0.1398 | 0.382788 | 1 | 10263 | tags=41%, list=1  |
| GO_PROTEI | GO_PROTEIN_LOCAL  | 83  | -0.4012 | -1.3399 | 0.1399 | 0.407082 | 1 | 8830  | tags=34%, list=1  |
| GO_NCRNA  | GO_NCRNA_EXPORT   | 36  | -0.5761 | -1.4493 | 0.14   | 0.386124 | 1 | 9700  | tags=47%, list=1' |
| GO_REGUL  | GO_REGULATION_OI  | 74  | -0.3357 | -1.2662 | 0.1403 | 0.425878 | 1 | 9635  | tags=27%, list=1' |
| GO_ENSHE  | GO_ENSHEATHMENT   | 138 | -0.319  | -1.2724 | 0.1404 | 0.424359 | 1 | 8858  | tags=29%, list=1  |
| GO_INORG. | GO_INORGANIC_ANI  | 143 | -0.3151 | -1.2587 | 0.1406 | 0.42508  | 1 | 7452  | tags=26%, list=1  |
| GO_HEXOS  | GO_HEXOSE_TRANSI  | 19  | -0.4267 | -1.2771 | 0.1409 | 0.425894 | 1 | 8827  | tags=37%, list=1  |
| GO_PROTO  | GO_PROTON_EXPOR'  | 17  | -0.4646 | -1.302  | 0.1415 | 0.415972 | 1 | 12241 | tags=47%, list=2  |
| GO_SPINAL | GO_SPINAL_CORD_M  | 35  | -0.4246 | -1.2879 | 0.1416 | 0.419227 | 1 | 16413 | tags=46%, list=2  |
| GO_REGUL  | GO_REGULATION_OI  | 129 | -0.3274 | -1.2648 | 0.142  | 0.425945 | 1 | 16894 | tags=44%, list=2' |
| GO_NOSE_] | GO_NOSE_DEVELOPI  | 15  | -0.5588 | -1.3362 | 0.1426 | 0.4074   | 1 | 9043  | tags=47%, list=1  |
| GO_CYTOP  | GO_CYTOPLASMIC_S  | 72  | -0.4322 | -1.3653 | 0.1426 | 0.396715 | 1 | 9901  | tags=36%, list=1' |
| GO_CALCII | GO_CALCIUM_ION_II | 21  | -0.4245 | -1.2822 | 0.1429 | 0.42299  | 1 | 14054 | tags=48%, list=2  |
| GO_ANTIPC | GO_ANTIPORTER_AC  | 82  | -0.3319 | -1.2486 | 0.1429 | 0.429947 | 1 | 15374 | tags=37%, list=2  |
| GO_REGUL  | GO_REGULATION_OI  | 30  | -0.3871 | -1.2775 | 0.1431 | 0.426143 | 1 | 12398 | tags=37%, list=2  |
| GO_REGUL  | GO_REGULATORY_R   | 41  | -0.4447 | -1.3139 | 0.1434 | 0.407158 | 1 | 9576  | tags=39%, list=1  |
| GO_RESPO! | GO_RESPONSE_TO_M  | 22  | -0.4384 | -1.3269 | 0.1434 | 0.410153 | 1 | 9901  | tags=41%, list=1' |

|           |                   |     |         |         |        |          |   |       |                  |
|-----------|-------------------|-----|---------|---------|--------|----------|---|-------|------------------|
| GO_NEGAT  | GO_NEGATIVE_REGU  | 104 | -0.3184 | -1.2597 | 0.1437 | 0.424473 | 1 | 7285  | tags=24%, list=1 |
| GO_GLUCCO | GO_GLUCCOSE_IMPOI | 71  | -0.3566 | -1.2645 | 0.1449 | 0.425341 | 1 | 15413 | tags=42%, list=2 |
| GO_MEIOTI | GO_MEIOTIC_CHRON  | 22  | -0.5009 | -1.3623 | 0.145  | 0.396095 | 1 | 15158 | tags=50%, list=2 |
| GO_FATTY  | GO_FATTY_ACYL_CC  | 29  | -0.4157 | -1.3307 | 0.1454 | 0.409437 | 1 | 12285 | tags=41%, list=2 |
| GO_CELLU  | GO_CELLULAR_COM   | 57  | -0.3488 | -1.2577 | 0.146  | 0.424712 | 1 | 11439 | tags=37%, list=2 |
| GO_CALYX  | GO_CALYX_OF_HELI  | 23  | -0.4921 | -1.3239 | 0.1466 | 0.410822 | 1 | 18541 | tags=61%, list=3 |
| GO_NEURC  | GO_NEUROMUSCUL    | 104 | -0.3763 | -1.2745 | 0.1468 | 0.424981 | 1 | 16273 | tags=49%, list=2 |
| GO_REGUL  | GO_REGULATION_OI  | 486 | -0.311  | -1.2722 | 0.147  | 0.423833 | 1 | 12556 | tags=35%, list=2 |
| GO_NEGAT  | GO_NEGATIVE_REGU  | 25  | -0.4201 | -1.2941 | 0.1473 | 0.41787  | 1 | 18576 | tags=48%, list=3 |
| GO_TRNA_  | GO_TRNA_TRANSPOI  | 35  | -0.5759 | -1.4468 | 0.1477 | 0.380407 | 1 | 9700  | tags=46%, list=1 |
| GO_HIGH_I | GO_HIGH_DENSITY_I | 16  | -0.4819 | -1.3312 | 0.1479 | 0.409223 | 1 | 6746  | tags=31%, list=1 |
| GO_EXTRA  | GO_EXTRACELLULA   | 74  | -0.3847 | -1.2666 | 0.1482 | 0.426942 | 1 | 15363 | tags=50%, list=2 |
| GO_POSITI | GO_POSITIVE_REGUI | 22  | -0.4558 | -1.33   | 0.1486 | 0.408806 | 1 | 4305  | tags=32%, list=7 |
| GO_REGUL  | GO_REGULATION_OI  | 99  | -0.3396 | -1.2603 | 0.1491 | 0.424611 | 1 | 8907  | tags=30%, list=1 |
| GO_NEGAT  | GO_NEGATIVE_REGU  | 33  | -0.3793 | -1.2655 | 0.1492 | 0.425547 | 1 | 9340  | tags=30%, list=1 |
| GO_FEMAL  | GO_FEMALE_SEX_DI  | 119 | -0.3061 | -1.2193 | 0.15   | 0.44108  | 1 | 13841 | tags=38%, list=2 |
| GO_CALMC  | GO_CALMODULIN_B   | 199 | -0.3233 | -1.2733 | 0.1504 | 0.425512 | 1 | 10444 | tags=32%, list=1 |
| GO_DETEC  | GO_DETECTION_OF_  | 43  | -0.3949 | -1.2437 | 0.1505 | 0.432177 | 1 | 10920 | tags=33%, list=1 |
| GO_POTAS  | GO_POTASSIUM_ION  | 18  | -0.4579 | -1.3027 | 0.1509 | 0.4156   | 1 | 20717 | tags=67%, list=3 |
| GO_POSITI | GO_POSITIVE_REGUI | 16  | -0.486  | -1.3366 | 0.1511 | 0.407666 | 1 | 8997  | tags=50%, list=1 |
| GO_TELEN  | GO_TELENCEPHALO   | 22  | -0.4477 | -1.3156 | 0.1511 | 0.409221 | 1 | 17193 | tags=55%, list=2 |
| GO_REGUL  | GO_REGULATION_OI  | 40  | -0.4052 | -1.3119 | 0.1512 | 0.407587 | 1 | 20444 | tags=52%, list=3 |
| GO_NEURC  | GO_NEUROMUSCUL    | 23  | -0.4571 | -1.2929 | 0.1512 | 0.417935 | 1 | 12506 | tags=52%, list=2 |
| GO_DENDR  | GO_DENDRITE_SELF  | 16  | -0.4878 | -1.2965 | 0.1513 | 0.417525 | 1 | 12923 | tags=38%, list=2 |
| GO_GAP_JU | GO_GAP_JUNCTION   | 31  | -0.3814 | -1.2643 | 0.1517 | 0.42442  | 1 | 6854  | tags=29%, list=1 |
| GO_STRIAT | GO_STRIATED_MUSC  | 21  | -0.4754 | -1.3395 | 0.1519 | 0.407485 | 1 | 6864  | tags=29%, list=1 |
| GO_FORMA  | GO_FORMATION_OF_  | 124 | -0.3621 | -1.3416 | 0.1522 | 0.407635 | 1 | 10951 | tags=37%, list=1 |
| GO_PROTO  | GO_PROTON_TRANSI  | 137 | -0.3029 | -1.2388 | 0.1523 | 0.433434 | 1 | 10114 | tags=27%, list=1 |
| GO_NEGAT  | GO_NEGATIVE_REGU  | 183 | -0.3057 | -1.242  | 0.1527 | 0.432371 | 1 | 8823  | tags=30%, list=1 |
| GO_C_ACY  | GO_C_ACYLTRANSFI  | 20  | -0.4666 | -1.2913 | 0.1529 | 0.418216 | 1 | 12175 | tags=40%, list=2 |
| GO_NEPHR  | GO_NEPHRON_TUBU   | 18  | -0.4363 | -1.286  | 0.1529 | 0.419016 | 1 | 5439  | tags=28%, list=9 |
| GO_PLASM  | GO_PLASMA_MEMBI   | 200 | -0.3551 | -1.309  | 0.1532 | 0.410632 | 1 | 17119 | tags=43%, list=2 |
| GO_VOLTA  | GO_VOLTAGE_GATE   | 23  | -0.4771 | -1.306  | 0.1534 | 0.413662 | 1 | 20619 | tags=65%, list=3 |
| GO_POSITI | GO_POSITIVE_REGUI | 26  | -0.4338 | -1.3156 | 0.1534 | 0.408832 | 1 | 15233 | tags=58%, list=2 |
| GO_BITTER | GO_BITTER_TASTE_I | 20  | -0.5866 | -1.3844 | 0.1535 | 0.391879 | 1 | 13202 | tags=60%, list=2 |
| GO_WALKI  | GO_WALKING_BEHA   | 29  | -0.4573 | -1.3132 | 0.1538 | 0.407191 | 1 | 18325 | tags=59%, list=3 |
| GO_MUSCI  | GO_MUSCLE_FILAMI  | 39  | -0.4313 | -1.3025 | 0.154  | 0.415448 | 1 | 11765 | tags=38%, list=2 |
| GO_REGUL  | GO_REGULATION_OI  | 15  | -0.5176 | -1.3445 | 0.1543 | 0.406987 | 1 | 4573  | tags=27%, list=8 |
| GO_REGUL  | GO_REGULATION_OI  | 117 | -0.3868 | -1.3373 | 0.1543 | 0.407331 | 1 | 10263 | tags=35%, list=1 |
| GO_SYNAP  | GO_SYNAPTIC_CLEF  | 16  | -0.4914 | -1.3437 | 0.1545 | 0.407327 | 1 | 7648  | tags=38%, list=1 |
| GO_REGUL  | GO_REGULATION_OI  | 58  | -0.3699 | -1.267  | 0.1549 | 0.427017 | 1 | 15413 | tags=43%, list=2 |
| GO_TROPH  | GO_TROPHOBLAST_(  | 16  | -0.4336 | -1.2848 | 0.155  | 0.419914 | 1 | 9127  | tags=38%, list=1 |
| GO_CELLU  | GO_CELLULAR_RESF  | 140 | -0.2998 | -1.2232 | 0.1551 | 0.442876 | 1 | 11903 | tags=31%, list=2 |
| GO_AXONE  | GO_AXONEMAL_DYI   | 29  | -0.4727 | -1.3518 | 0.1552 | 0.403739 | 1 | 11864 | tags=48%, list=2 |
| GO_ESTABI | GO_ESTABLISHMENI  | 21  | -0.405  | -1.2728 | 0.1552 | 0.424137 | 1 | 13615 | tags=43%, list=2 |
| GO_REGUL  | GO_REGULATION_OI  | 78  | -0.3961 | -1.2736 | 0.1553 | 0.425743 | 1 | 15315 | tags=49%, list=2 |
| GO_MODIF  | GO_MODIFIED_AMIN  | 27  | -0.4063 | -1.2736 | 0.1555 | 0.425308 | 1 | 7781  | tags=30%, list=1 |
| GO_NEGAT  | GO_NEGATIVE_REGU  | 232 | -0.3032 | -1.2328 | 0.1556 | 0.435113 | 1 | 7482  | tags=22%, list=1 |
| GO_POSITI | GO_POSITIVE_REGUI | 111 | -0.3437 | -1.2927 | 0.1558 | 0.417754 | 1 | 11210 | tags=32%, list=1 |
| GO_VOLTA  | GO_VOLTAGE_GATE   | 17  | -0.4922 | -1.3314 | 0.1561 | 0.40989  | 1 | 2399  | tags=18%, list=4 |
| GO_ANION  | GO_ANION_TRANSM   | 353 | -0.2761 | -1.2024 | 0.1561 | 0.449371 | 1 | 15498 | tags=35%, list=2 |
| GO_EXTRA  | GO_EXTRACELLULA   | 22  | -0.533  | -1.3736 | 0.1562 | 0.397108 | 1 | 13904 | tags=55%, list=2 |
| GO_HEPAR  | GO_HEPARIN_BINDI  | 158 | -0.3715 | -1.3147 | 0.1563 | 0.408535 | 1 | 8308  | tags=30%, list=1 |
| GO_GLYCO  | GO_GLYCOGEN_BIOI  | 45  | -0.3567 | -1.2297 | 0.1563 | 0.437911 | 1 | 20825 | tags=58%, list=3 |
| GO_REGUL  | GO_REGULATION_OI  | 100 | -0.3578 | -1.2728 | 0.1564 | 0.424447 | 1 | 10943 | tags=37%, list=1 |
| GO_NEURC  | GO_NEURONAL_ACT   | 34  | -0.4227 | -1.2642 | 0.1564 | 0.424218 | 1 | 11031 | tags=41%, list=1 |
| GO_MALE_  | GO_MALE_GENITALI  | 23  | -0.4358 | -1.2912 | 0.1566 | 0.417391 | 1 | 11652 | tags=39%, list=2 |
| GO_REPRO  | GO_REPRODUCTIVE_  | 443 | -0.2735 | -1.2123 | 0.1567 | 0.445521 | 1 | 11903 | tags=31%, list=2 |

|           |                   |     |         |         |        |          |   |       |                  |
|-----------|-------------------|-----|---------|---------|--------|----------|---|-------|------------------|
| GO_ESTABL | GO_ESTABLISHMENT  | 137 | -0.3467 | -1.2969 | 0.1568 | 0.418229 | 1 | 12361 | tags=35%, list=2 |
| GO_REGUL  | GO_REGULATION_OF  | 52  | -0.3715 | -1.2407 | 0.1569 | 0.43257  | 1 | 15864 | tags=40%, list=2 |
| GO_STRIAT | GO_STRIATED_MUSC  | 283 | -0.3096 | -1.245  | 0.157  | 0.433055 | 1 | 11823 | tags=33%, list=2 |
| GO_STRIAT | GO_STRIATED_MUSC  | 171 | -0.3276 | -1.2663 | 0.1575 | 0.426965 | 1 | 11874 | tags=33%, list=2 |
| GO_REGUL  | GO_REGULATION_OF  | 80  | -0.3846 | -1.3336 | 0.1576 | 0.407632 | 1 | 7793  | tags=30%, list=1 |
| GO_INHIBI | GO_INHIBITORY_PO  | 16  | -0.5428 | -1.3211 | 0.1578 | 0.409512 | 1 | 18875 | tags=63%, list=3 |
| GO_GLOME  | GO_GLOMERULAR_E   | 20  | -0.4524 | -1.2857 | 0.1579 | 0.419257 | 1 | 26429 | tags=65%, list=4 |
| GO_DETEC  | GO_DETECTION_OF_  | 62  | -0.3298 | -1.2202 | 0.1582 | 0.44221  | 1 | 18221 | tags=42%, list=3 |
| GO_REGUL  | GO_REGULATION_OF  | 23  | -0.3975 | -1.2627 | 0.1582 | 0.424031 | 1 | 20059 | tags=61%, list=3 |
| GO_REGUL  | GO_REGULATION_OF  | 34  | -0.4592 | -1.3148 | 0.1587 | 0.408773 | 1 | 9243  | tags=41%, list=1 |
| GO_TUBUL  | GO_TUBULIN_BINDI  | 348 | -0.3539 | -1.2981 | 0.1587 | 0.418275 | 1 | 14612 | tags=39%, list=2 |
| GO_ACTIV  | GO_ACTIVATION_OF  | 18  | -0.4756 | -1.3406 | 0.1588 | 0.407904 | 1 | 17430 | tags=56%, list=3 |
| GO_SARCO  | GO_SARCOPLASM     | 77  | -0.3755 | -1.3143 | 0.1588 | 0.408356 | 1 | 14545 | tags=43%, list=2 |
| GO_CARDI  | GO_CARDIAC_MUSC   | 135 | -0.3326 | -1.2466 | 0.1592 | 0.432427 | 1 | 10232 | tags=31%, list=1 |
| GO_REGUL  | GO_REGULATION_OF  | 47  | -0.3671 | -1.2494 | 0.1594 | 0.429404 | 1 | 12168 | tags=43%, list=2 |
| GO_SYNAP  | GO_SYNAPTIC_TRAN  | 30  | -0.3908 | -1.2574 | 0.1596 | 0.423383 | 1 | 8287  | tags=30%, list=1 |
| GO_REGUL  | GO_REGULATION_OF  | 167 | -0.3185 | -1.2599 | 0.1596 | 0.424998 | 1 | 9577  | tags=27%, list=1 |
| GO_CELL_  | GO_CELL_FATE_DET  | 42  | -0.3963 | -1.2608 | 0.1602 | 0.424227 | 1 | 7885  | tags=33%, list=1 |
| GO_MUSCL  | GO_MUSCLE_HYPER   | 106 | -0.3394 | -1.2566 | 0.1603 | 0.424316 | 1 | 12950 | tags=34%, list=2 |
| GO_PROTE  | GO_PROTEIN_MEMB   | 20  | -0.4111 | -1.2513 | 0.1608 | 0.428799 | 1 | 13008 | tags=45%, list=2 |
| GO_TRANS  | GO_TRANSFORMING   | 23  | -0.5143 | -1.3463 | 0.1608 | 0.407734 | 1 | 17271 | tags=52%, list=3 |
| GO_NEGAT  | GO_NEGATIVE_REGU  | 101 | -0.3031 | -1.2227 | 0.161  | 0.442146 | 1 | 11087 | tags=28%, list=1 |
| GO_MICRO  | GO_MICROTUBULE_   | 20  | -0.5337 | -1.3602 | 0.1612 | 0.396851 | 1 | 6486  | tags=30%, list=1 |
| GO_POSITI | GO_POSITIVE_REGUI | 50  | -0.4206 | -1.333  | 0.1615 | 0.407153 | 1 | 12664 | tags=44%, list=2 |
| GO_TRIGL  | GO_TRIGLYCERIDE_  | 38  | -0.3848 | -1.2445 | 0.1619 | 0.432636 | 1 | 5875  | tags=24%, list=1 |
| GO_DNA_P  | GO_DNA_PACKAGIN   | 23  | -0.5168 | -1.3769 | 0.1619 | 0.395179 | 1 | 13109 | tags=43%, list=2 |
| GO_MUSCL  | GO_MUSCLE_CONTR   | 353 | -0.353  | -1.3131 | 0.1619 | 0.406873 | 1 | 11874 | tags=37%, list=2 |
| GO_LIMBIC | GO_LIMBIC_SYSTEM  | 108 | -0.3442 | -1.2449 | 0.1622 | 0.432781 | 1 | 15403 | tags=37%, list=2 |
| GO_PHENO  | GO_PHENOTYPIC_SW  | 15  | -0.5291 | -1.3044 | 0.1624 | 0.414697 | 1 | 13862 | tags=47%, list=2 |
| GO_REGUL  | GO_REGULATION_OF  | 72  | -0.3714 | -1.3013 | 0.1625 | 0.415805 | 1 | 9654  | tags=32%, list=1 |
| GO_NEURC  | GO_NEUROTRANSMI   | 31  | -0.4028 | -1.2613 | 0.1626 | 0.423732 | 1 | 18325 | tags=48%, list=3 |
| GO_ACIDIC | GO_ACIDIC_AMINO_  | 70  | -0.3512 | -1.2463 | 0.1626 | 0.432242 | 1 | 16390 | tags=46%, list=2 |
| GO_STERO  | GO_STEROID_HORM   | 78  | -0.3457 | -1.2662 | 0.1627 | 0.426288 | 1 | 8314  | tags=33%, list=1 |
| GO_COPII  | GO_COPII_COATED_  | 15  | -0.5549 | -1.3615 | 0.1632 | 0.396052 | 1 | 15233 | tags=60%, list=2 |
| GO_CELL_  | GO_CELL_PROJECTIC | 335 | -0.2865 | -1.2123 | 0.1632 | 0.445856 | 1 | 13067 | tags=34%, list=2 |
| GO_GLYCO  | GO_GLYCOPROTEIN_  | 19  | -0.5129 | -1.3655 | 0.1633 | 0.398655 | 1 | 5834  | tags=42%, list=1 |
| GO_ORGAN  | GO_ORGANIC_HYDR   | 256 | -0.2854 | -1.2106 | 0.1633 | 0.446338 | 1 | 7361  | tags=20%, list=1 |
| GO_VESIC  | GO_VESICLE_MEDIA  | 217 | -0.3747 | -1.3241 | 0.1636 | 0.411876 | 1 | 9535  | tags=34%, list=1 |
| GO_CORTI  | GO_CORTICAL_ACTI  | 79  | -0.3342 | -1.2408 | 0.1638 | 0.432761 | 1 | 11765 | tags=32%, list=2 |
| GO_ASSOC  | GO_ASSOCIATIVE_LI | 75  | -0.365  | -1.2671 | 0.1638 | 0.427218 | 1 | 11028 | tags=33%, list=1 |
| GO_POSITI | GO_POSITIVE_REGUI | 21  | -0.4202 | -1.2618 | 0.164  | 0.42433  | 1 | 5439  | tags=29%, list=9 |
| GO_RESPO  | GO_RESPONSE_TO_V  | 19  | -0.4431 | -1.2576 | 0.1641 | 0.424106 | 1 | 14804 | tags=58%, list=2 |
| GO_NEGAT  | GO_NEGATIVE_REGU  | 49  | -0.3452 | -1.2501 | 0.1641 | 0.429798 | 1 | 6476  | tags=24%, list=1 |
| GO_AMINE  | GO_AMINE_TRANSP   | 96  | -0.3614 | -1.2485 | 0.1643 | 0.42983  | 1 | 19324 | tags=49%, list=3 |
| GO_EYE_M  | GO_EYE_MORPHOGE   | 154 | -0.3105 | -1.2367 | 0.1644 | 0.43346  | 1 | 14688 | tags=41%, list=2 |
| GO_PASSIV | GO_PASSIVE_TRANS  | 457 | -0.2992 | -1.204  | 0.1646 | 0.448836 | 1 | 15397 | tags=38%, list=2 |
| GO_BASIC_ | GO_BASIC_AMINO_A  | 17  | -0.4617 | -1.2946 | 0.165  | 0.419189 | 1 | 6516  | tags=24%, list=1 |
| GO_CYTOP  | GO_CYTOPLASMIC_F  | 243 | -0.3412 | -1.2866 | 0.165  | 0.418822 | 1 | 9173  | tags=28%, list=1 |
| GO_NEGAT  | GO_NEGATIVE_REGU  | 154 | -0.3175 | -1.2621 | 0.1651 | 0.424276 | 1 | 12756 | tags=34%, list=2 |
| GO_REGUL  | GO_REGULATION_OF  | 217 | -0.303  | -1.249  | 0.1651 | 0.429764 | 1 | 6486  | tags=24%, list=1 |
| GO_DOPAM  | GO_DOPAMINE_REC   | 17  | -0.4557 | -1.2947 | 0.1657 | 0.41964  | 1 | 12151 | tags=41%, list=2 |
| GO_POSITI | GO_POSITIVE_REGUI | 171 | -0.3191 | -1.2631 | 0.1657 | 0.424039 | 1 | 10045 | tags=33%, list=1 |
| GO_PRESY  | GO_PRESYNAPTIC_E  | 62  | -0.3627 | -1.2647 | 0.1657 | 0.425694 | 1 | 7560  | tags=32%, list=1 |
| GO_COGNI  | GO_COGNITION      | 293 | -0.3091 | -1.2298 | 0.1657 | 0.438066 | 1 | 9854  | tags=32%, list=1 |
| GO_REGUL  | GO_REGULATION_OF  | 88  | -0.3322 | -1.2418 | 0.166  | 0.432023 | 1 | 11099 | tags=33%, list=1 |
| GO_PRESY  | GO_PRESYNAPTIC_M  | 154 | -0.3787 | -1.297  | 0.1667 | 0.418383 | 1 | 12388 | tags=42%, list=2 |
| GO_REGUL  | GO_REGULATION_OF  | 38  | -0.4087 | -1.2751 | 0.1667 | 0.424828 | 1 | 20619 | tags=58%, list=3 |
| GO_VASCU  | GO_VASCULAR_PRO   | 189 | -0.3299 | -1.2399 | 0.1667 | 0.432476 | 1 | 11664 | tags=34%, list=2 |



|           |                  |     |         |         |        |          |   |       |                  |
|-----------|------------------|-----|---------|---------|--------|----------|---|-------|------------------|
| GO_HORMON | GO_HORMONE_TRAN  | 315 | -0.2813 | -1.1972 | 0.1667 | 0.451869 | 1 | 12664 | tags=32%, list=2 |
| GO_GLUTA  | GO_GlutAMINE_FA  | 71  | -0.3351 | -1.2255 | 0.167  | 0.439715 | 1 | 14421 | tags=38%, list=2 |
| GO_CELLU  | GO_CELLULAR_RES  | 81  | -0.3448 | -1.2378 | 0.167  | 0.433082 | 1 | 10943 | tags=30%, list=1 |
| GO_SYNAP  | GO_SYNAPTIC_MEM  | 28  | -0.4526 | -1.316  | 0.1673 | 0.409002 | 1 | 11122 | tags=43%, list=1 |
| GO_ENDOT  | GO_ENDOTHELIUM   | 132 | -0.3764 | -1.3366 | 0.1674 | 0.407193 | 1 | 9208  | tags=35%, list=1 |
| GO_OOCY   | GO_OOCYTE_DIFFER | 48  | -0.3503 | -1.2268 | 0.1676 | 0.439307 | 1 | 8476  | tags=27%, list=1 |
| GO_RETRO  | GO_RETROGRADE_A  | 20  | -0.5001 | -1.3097 | 0.1676 | 0.410238 | 1 | 4046  | tags=30%, list=7 |
| GO_INTRAC | GO_INTRACELLULAR | 54  | -0.3878 | -1.2941 | 0.1677 | 0.417503 | 1 | 9654  | tags=31%, list=1 |
| GO_SMOOT  | GO_SMOOTH_ENDOF  | 34  | -0.3739 | -1.2382 | 0.1677 | 0.433254 | 1 | 8265  | tags=26%, list=1 |
| GO_TYPE_I | GO_TYPE_B_PANCRE | 20  | -0.4625 | -1.3007 | 0.1677 | 0.415545 | 1 | 10943 | tags=45%, list=1 |
| GO_CELL_I | GO_CELL_DIFFEREN | 26  | -0.4514 | -1.2921 | 0.1677 | 0.418399 | 1 | 9318  | tags=46%, list=1 |
| GO_NEGAT  | GO_NEGATIVE_REGU | 18  | -0.4808 | -1.3452 | 0.168  | 0.40725  | 1 | 2766  | tags=28%, list=5 |
| GO_MUSCL  | GO_MUSCLE_CELL_I | 177 | -0.3338 | -1.2542 | 0.168  | 0.425865 | 1 | 11808 | tags=32%, list=2 |
| GO_MYOSI  | GO_MYOSIN_FILAME | 22  | -0.4778 | -1.3016 | 0.1683 | 0.415868 | 1 | 12387 | tags=41%, list=2 |
| GO_MICRO  | GO_MICROTUBULE_I | 185 | -0.353  | -1.2892 | 0.1686 | 0.417579 | 1 | 15533 | tags=42%, list=2 |
| GO_REGUL  | GO_REGULATION_OI | 41  | -0.4049 | -1.2764 | 0.1687 | 0.425061 | 1 | 14070 | tags=44%, list=2 |
| GO_MICRO  | GO_MICROTUBULE_I | 74  | -0.3816 | -1.3038 | 0.1696 | 0.414973 | 1 | 6486  | tags=27%, list=1 |
| GO_AMINO  | GO_AMINOGLYCAN   | 66  | -0.3715 | -1.2799 | 0.1696 | 0.425118 | 1 | 13771 | tags=45%, list=2 |
| GO_ACTIVI | GO_ACTIVIN_RECEP | 44  | -0.3669 | -1.2579 | 0.1697 | 0.425326 | 1 | 14016 | tags=36%, list=2 |
| GO_NEGAT  | GO_NEGATIVE_REGU | 15  | -0.4759 | -1.2913 | 0.1702 | 0.417758 | 1 | 3653  | tags=27%, list=6 |
| GO_CATIO  | GO_CATION_CHLORI | 17  | -0.4364 | -1.2419 | 0.1703 | 0.432223 | 1 | 17190 | tags=59%, list=2 |
| GO_AMPA   | GO_AMPA_GlutAM   | 26  | -0.4982 | -1.2978 | 0.1704 | 0.417966 | 1 | 13473 | tags=50%, list=2 |
| GO_NEGAT  | GO_NEGATIVE_REGU | 16  | -0.543  | -1.3193 | 0.1711 | 0.407009 | 1 | 10347 | tags=38%, list=1 |
| GO_INSULI | GO_INSULIN_RECEP | 23  | -0.4308 | -1.2699 | 0.1711 | 0.426761 | 1 | 12950 | tags=43%, list=2 |
| GO_PRESY  | GO_PRESYNAPTIC_A | 74  | -0.4289 | -1.3285 | 0.1712 | 0.409534 | 1 | 11596 | tags=45%, list=2 |
| GO_REGUL  | GO_REGULATION_OI | 44  | -0.3721 | -1.2624 | 0.1713 | 0.424036 | 1 | 11227 | tags=39%, list=1 |
| GO_NEGAT  | GO_NEGATIVE_REGU | 27  | -0.4425 | -1.291  | 0.1714 | 0.416964 | 1 | 17571 | tags=52%, list=3 |
| GO_FOCAL  | GO_FOCAL_ADHESIC | 83  | -0.3844 | -1.3246 | 0.1715 | 0.412089 | 1 | 8218  | tags=33%, list=1 |
| GO_ALDEH  | GO_ALDEHYDE_BIO  | 15  | -0.4395 | -1.2794 | 0.1715 | 0.425543 | 1 | 14980 | tags=47%, list=2 |
| GO_AMINO  | GO_AMINO_ACID_SC | 15  | -0.4723 | -1.2985 | 0.1715 | 0.417962 | 1 | 15413 | tags=53%, list=2 |
| GO_EUKAR  | GO_EUKARYOTIC_TH | 17  | -0.556  | -1.3641 | 0.1719 | 0.397311 | 1 | 4823  | tags=29%, list=8 |
| GO_EXTRA  | GO_EXTRACELLULA  | 166 | -0.4452 | -1.3675 | 0.1721 | 0.397269 | 1 | 14616 | tags=49%, list=2 |
| GO_INSULI | GO_INSULIN_SECRE | 62  | -0.3135 | -1.2092 | 0.1722 | 0.446746 | 1 | 9702  | tags=31%, list=1 |
| GO_NEGAT  | GO_NEGATIVE_REGU | 21  | -0.4984 | -1.3049 | 0.1723 | 0.414245 | 1 | 13862 | tags=33%, list=2 |
| GO_NEGAT  | GO_NEGATIVE_REGU | 28  | -0.432  | -1.2761 | 0.1726 | 0.425066 | 1 | 6062  | tags=25%, list=1 |
| GO_MIRNA  | GO_MIRNA_BINDING | 29  | -0.4914 | -1.3334 | 0.173  | 0.406924 | 1 | 9370  | tags=41%, list=1 |
| GO_NEGAT  | GO_NEGATIVE_REGU | 37  | -0.42   | -1.2868 | 0.173  | 0.419461 | 1 | 12274 | tags=43%, list=2 |
| GO_CARBO  | GO_CARBON_CARBC  | 49  | -0.375  | -1.2575 | 0.1733 | 0.424007 | 1 | 10225 | tags=31%, list=1 |
| GO_NEGAT  | GO_NEGATIVE_REGU | 27  | -0.4011 | -1.2654 | 0.1736 | 0.42535  | 1 | 12664 | tags=37%, list=2 |
| GO_OOGEN  | GO_OOGENESIS     | 82  | -0.3191 | -1.2185 | 0.1736 | 0.440635 | 1 | 8726  | tags=24%, list=1 |
| GO_TIGHT  | GO_TIGHT_JUNCTIO | 125 | -0.3336 | -1.2759 | 0.1743 | 0.424995 | 1 | 5649  | tags=23%, list=1 |
| GO_CYCLIC | GO_CYCLIC_NUCLEC | 36  | -0.3733 | -1.2386 | 0.1744 | 0.432894 | 1 | 20068 | tags=53%, list=3 |
| GO_ODONT  | GO_ODONTOGENESI  | 129 | -0.3349 | -1.2671 | 0.1751 | 0.428026 | 1 | 8585  | tags=31%, list=1 |
| GO_REGUL  | GO_REGULATION_OI | 35  | -0.3918 | -1.231  | 0.1751 | 0.437538 | 1 | 17921 | tags=51%, list=3 |
| GO_RENAL  | GO_RENAL_SYSTEM  | 123 | -0.3214 | -1.2273 | 0.1753 | 0.43997  | 1 | 11922 | tags=32%, list=2 |
| GO_RESPO  | GO_RESPONSE_TO_A | 69  | -0.3276 | -1.2159 | 0.1753 | 0.442415 | 1 | 10013 | tags=32%, list=1 |
| GO_LENS_I | GO_LENS_MORPHOG  | 20  | -0.4322 | -1.2662 | 0.1758 | 0.426669 | 1 | 8997  | tags=40%, list=1 |
| GO_MONO   | GO_MONOAMINE_TR  | 82  | -0.3658 | -1.2438 | 0.1759 | 0.43278  | 1 | 11361 | tags=35%, list=1 |
| GO_MRNA   | GO_MRNA_SPLICE_S | 48  | -0.452  | -1.2939 | 0.1765 | 0.416927 | 1 | 12984 | tags=46%, list=2 |
| GO_MEGA   | GO_MEGAKARYOCY   | 16  | -0.4724 | -1.2765 | 0.1765 | 0.425273 | 1 | 8217  | tags=38%, list=1 |
| GO_MESEN  | GO_MESENCHYMAL   | 20  | -0.4427 | -1.2812 | 0.1767 | 0.424079 | 1 | 5634  | tags=40%, list=1 |
| GO_PHOTO  | GO_PHOTORECEPTO  | 111 | -0.3242 | -1.2295 | 0.1777 | 0.437164 | 1 | 19648 | tags=45%, list=3 |
| GO_2_OXO  | GO_2_OXOGLUTARA  | 43  | -0.3808 | -1.2656 | 0.1779 | 0.425837 | 1 | 12094 | tags=35%, list=2 |
| GO_REGUL  | GO_REGULATION_OI | 124 | -0.3228 | -1.2408 | 0.1783 | 0.43306  | 1 | 12950 | tags=38%, list=2 |
| GO_CATEC  | GO_CATECHOLAMIN  | 21  | -0.4149 | -1.2337 | 0.1786 | 0.436224 | 1 | 5221  | tags=24%, list=9 |
| GO_MODIF  | GO_MODIFIED_AMIN | 20  | -0.4426 | -1.2874 | 0.1788 | 0.419141 | 1 | 7781  | tags=35%, list=1 |
| GO_DORSA  | GO_DORSAL_SPINAL | 22  | -0.4983 | -1.2645 | 0.1789 | 0.425658 | 1 | 19979 | tags=64%, list=3 |
| GO_RESOL  | GO_RESOLUTION_OF | 15  | -0.4976 | -1.2977 | 0.1789 | 0.417568 | 1 | 15158 | tags=47%, list=2 |

|           |                   |     |         |         |        |          |   |       |                   |
|-----------|-------------------|-----|---------|---------|--------|----------|---|-------|-------------------|
| GO_REGUL  | GO_REGULATION_OF  | 131 | -0.2979 | -1.2091 | 0.1789 | 0.446589 | 1 | 11233 | tags=27%, list=1' |
| GO_REGUL  | GO_REGULATION_OF  | 36  | -0.4043 | -1.277  | 0.1796 | 0.425526 | 1 | 9654  | tags=36%, list=1' |
| GO_REGUL  | GO_REGULATION_OF  | 478 | -0.2902 | -1.1844 | 0.18   | 0.458083 | 1 | 15397 | tags=40%, list=2  |
| GO_AXON   | GO_AXON_CYTOPLA   | 57  | -0.3807 | -1.2754 | 0.1802 | 0.425173 | 1 | 4046  | tags=23%, list=7  |
| GO_IMPORT | GO_IMPORT_ACROSS  | 156 | -0.3044 | -1.2021 | 0.1807 | 0.448878 | 1 | 15498 | tags=37%, list=2  |
| GO_ION    | GO_ION_CHANNEL_F  | 115 | -0.3227 | -1.212  | 0.1807 | 0.445571 | 1 | 6828  | tags=24%, list=1  |
| GO_SYNAP  | GO_SYNAPTIC_VESIC | 74  | -0.3548 | -1.2587 | 0.181  | 0.425389 | 1 | 9535  | tags=34%, list=1  |
| GO_POLY   | GO_POLY_A_BINDIN  | 23  | -0.4698 | -1.2978 | 0.1811 | 0.418367 | 1 | 10103 | tags=30%, list=1' |
| GO_MAGNI  | GO_MAGNESIUM_IOI  | 16  | -0.4921 | -1.3013 | 0.1814 | 0.415529 | 1 | 8736  | tags=44%, list=1  |
| GO_NEGAT  | GO_NEGATIVE_REGU  | 74  | -0.3567 | -1.2675 | 0.1815 | 0.428752 | 1 | 7971  | tags=27%, list=1  |
| GO_REGUL  | GO_REGULATION_OF  | 338 | -0.2955 | -1.1934 | 0.1816 | 0.452642 | 1 | 12141 | tags=35%, list=2  |
| GO_MITOC  | GO_MITOCHONDRIO   | 16  | -0.455  | -1.2712 | 0.1818 | 0.425275 | 1 | 18814 | tags=56%, list=3  |
| GO_CONNE  | GO_CONNECTIVE_TI  | 20  | -0.4527 | -1.2671 | 0.1818 | 0.42763  | 1 | 9470  | tags=35%, list=1  |
| GO_CELLU  | GO_CELLULAR_GLU   | 70  | -0.3262 | -1.2227 | 0.1818 | 0.442502 | 1 | 15406 | tags=43%, list=2  |
| GO_POSITI | GO_POSITIVE_REGUI | 49  | -0.4221 | -1.2911 | 0.182  | 0.417158 | 1 | 7830  | tags=39%, list=1  |
| GO_SENSO  | GO_SENSORY_PERCI  | 217 | -0.2874 | -1.1811 | 0.182  | 0.460516 | 1 | 18301 | tags=39%, list=3  |
| GO_SODIU  | GO_SODIUM_CHANN   | 44  | -0.3889 | -1.2445 | 0.1822 | 0.432274 | 1 | 11031 | tags=34%, list=1' |
| GO_ACROS  | GO_ACROSOME_ASS   | 15  | -0.4518 | -1.2696 | 0.1825 | 0.426975 | 1 | 13249 | tags=33%, list=2  |
| GO_RESPO  | GO_RESPONSE_TO_R  | 107 | -0.2993 | -1.1929 | 0.1828 | 0.452711 | 1 | 4739  | tags=20%, list=8  |
| GO_CEREB  | GO_CEREBRAL_COR   | 112 | -0.3472 | -1.2463 | 0.183  | 0.432626 | 1 | 15403 | tags=39%, list=2  |
| GO_PITUIT | GO_PITUITARY_GLA  | 42  | -0.3715 | -1.2066 | 0.1834 | 0.446669 | 1 | 19979 | tags=60%, list=3  |
| GO_POSITI | GO_POSITIVE_REGUI | 28  | -0.3945 | -1.2634 | 0.1839 | 0.423943 | 1 | 6716  | tags=29%, list=1' |
| GO_MICRO  | GO_MICROTUBULE_I  | 252 | -0.3553 | -1.2779 | 0.184  | 0.426179 | 1 | 14612 | tags=39%, list=2  |
| GO_SYNAP  | GO_SYNAPTONEMAI   | 40  | -0.4121 | -1.2639 | 0.1842 | 0.42383  | 1 | 17563 | tags=48%, list=3  |
| GO_NEGAT  | GO_NEGATIVE_REGU  | 30  | -0.3757 | -1.2218 | 0.1847 | 0.441899 | 1 | 19088 | tags=53%, list=3  |
| GO_RESPO  | GO_RESPONSE_TO_A  | 234 | -0.2776 | -1.179  | 0.1848 | 0.46108  | 1 | 10151 | tags=26%, list=1' |
| GO_ANION  | GO_ANION_CATION_  | 22  | -0.4214 | -1.24   | 0.185  | 0.43297  | 1 | 17190 | tags=59%, list=2' |
| GO_NEGAT  | GO_NEGATIVE_REGU  | 31  | -0.376  | -1.2313 | 0.185  | 0.437412 | 1 | 13442 | tags=35%, list=2  |
| GO_MATER  | GO_MATERNAL_PLA   | 36  | -0.3408 | -1.189  | 0.1858 | 0.455519 | 1 | 12819 | tags=39%, list=2  |
| GO_SWI    | GO_SWI_SNF_COMPL  | 17  | -0.5231 | -1.3169 | 0.1859 | 0.408747 | 1 | 13852 | tags=59%, list=2  |
| GO_DNA    | GO_DNA_METHYLA    | 70  | -0.3899 | -1.2673 | 0.1859 | 0.428673 | 1 | 16537 | tags=37%, list=2  |
| GO_BONE   | GO_BONE_DEVELOP   | 195 | -0.3367 | -1.255  | 0.186  | 0.425652 | 1 | 16573 | tags=43%, list=2  |
| GO_REGUL  | GO_REGULATION_OF  | 18  | -0.4561 | -1.264  | 0.186  | 0.424152 | 1 | 18362 | tags=44%, list=3  |
| GO_MYOFI  | GO_MYOFILAMENT    | 25  | -0.4502 | -1.2988 | 0.1862 | 0.41788  | 1 | 6864  | tags=28%, list=1  |
| GO_TRANS  | GO_TRANSCYTOSIS   | 20  | -0.4156 | -1.2443 | 0.1864 | 0.432198 | 1 | 3754  | tags=35%, list=6  |
| GO_COENZ  | GO_COENZYME_A_M   | 15  | -0.4898 | -1.323  | 0.1869 | 0.40984  | 1 | 643   | tags=20%, list=1' |
| GO_CYTOS  | GO_CYTOSKELETON   | 196 | -0.3504 | -1.2723 | 0.187  | 0.424164 | 1 | 8418  | tags=29%, list=1  |
| GO_GLUTA  | GO_GLUTAMATE_RE   | 101 | -0.3926 | -1.2381 | 0.1872 | 0.433073 | 1 | 13257 | tags=46%, list=2  |
| GO_ENTER  | GO_ENTEROENDOCR   | 27  | -0.4399 | -1.2807 | 0.1878 | 0.424439 | 1 | 11638 | tags=44%, list=2  |
| GO_POSITI | GO_POSITIVE_REGUI | 72  | -0.3326 | -1.2205 | 0.1878 | 0.442287 | 1 | 9470  | tags=31%, list=1  |
| GO_MAMM   | GO_MAMMARY_GLA    | 140 | -0.2837 | -1.2038 | 0.1879 | 0.448668 | 1 | 6873  | tags=24%, list=1  |
| GO_TRANS  | GO_TRANSLATION_F  | 16  | -0.5156 | -1.314  | 0.1886 | 0.40752  | 1 | 5527  | tags=31%, list=9  |
| GO_NEGAT  | GO_NEGATIVE_REGU  | 60  | -0.329  | -1.2011 | 0.1887 | 0.448543 | 1 | 12950 | tags=33%, list=2  |
| GO_POSTS  | GO_POSTSYNAPTIC_  | 17  | -0.4526 | -1.2636 | 0.189  | 0.424007 | 1 | 11765 | tags=35%, list=2  |
| GO_CELLU  | GO_CELLULAR_RESF  | 57  | -0.3392 | -1.2195 | 0.1891 | 0.440979 | 1 | 11248 | tags=32%, list=1' |
| GO_POSTS  | GO_POSTSYNAPTIC_  | 15  | -0.4468 | -1.2437 | 0.1899 | 0.432511 | 1 | 8907  | tags=40%, list=1  |
| GO_REGUL  | GO_REGULATION_OF  | 78  | -0.4225 | -1.3205 | 0.1902 | 0.409632 | 1 | 9389  | tags=36%, list=1  |
| GO_REGUL  | GO_REGULATION_OF  | 64  | -0.387  | -1.2645 | 0.1902 | 0.424946 | 1 | 10614 | tags=41%, list=1  |
| GO_BICARI | GO_BICARBONATE_I  | 21  | -0.4359 | -1.2295 | 0.1902 | 0.437446 | 1 | 2930  | tags=19%, list=5  |
| GO_NEGAT  | GO_NEGATIVE_REGU  | 51  | -0.3361 | -1.2104 | 0.1908 | 0.446373 | 1 | 12398 | tags=37%, list=2  |
| GO_ORGAN  | GO_ORGANELLE_TR   | 82  | -0.3754 | -1.2686 | 0.191  | 0.427457 | 1 | 13484 | tags=41%, list=2  |
| GO_REGUL  | GO_REGULATION_OF  | 33  | -0.412  | -1.2656 | 0.1911 | 0.426097 | 1 | 14514 | tags=42%, list=2  |
| GO_POSITI | GO_POSITIVE_REGUI | 25  | -0.3972 | -1.2432 | 0.1912 | 0.432745 | 1 | 11248 | tags=40%, list=1' |
| GO_REGUL  | GO_REGULATION_OF  | 81  | -0.3359 | -1.2214 | 0.1918 | 0.441794 | 1 | 12556 | tags=35%, list=2  |
| GO_CORTIC | GO_CORTICAL_CYTC  | 105 | -0.3252 | -1.2272 | 0.1919 | 0.439716 | 1 | 11099 | tags=30%, list=1' |
| GO_KINESI | GO_KINESIN_COMPL  | 50  | -0.4383 | -1.3122 | 0.1923 | 0.407613 | 1 | 14495 | tags=46%, list=2  |
| GO_CELL   | GO_CELL_FATE_COM  | 274 | -0.3029 | -1.207  | 0.1923 | 0.446284 | 1 | 15429 | tags=43%, list=2  |
| GO_MUSCI  | GO_MUSCLE_ADAPT   | 123 | -0.3048 | -1.1834 | 0.193  | 0.458166 | 1 | 11495 | tags=32%, list=2  |

|           |                   |     |         |         |        |          |   |       |                  |
|-----------|-------------------|-----|---------|---------|--------|----------|---|-------|------------------|
| GO_CYTOS  | GO_CYTOSKELETAL   | 22  | -0.4364 | -1.2504 | 0.1932 | 0.430001 | 1 | 13008 | tags=45%, list=2 |
| GO_CELL   | GO_CELL_COMMUNI   | 31  | -0.423  | -1.2644 | 0.1932 | 0.424704 | 1 | 15184 | tags=42%, list=2 |
| GO_GLOME  | GO_GLOMERULAR_E   | 23  | -0.4287 | -1.2367 | 0.1933 | 0.43316  | 1 | 11652 | tags=30%, list=2 |
| GO_POSITI | GO_POSITIVE_REGUL | 17  | -0.4342 | -1.2421 | 0.1936 | 0.433074 | 1 | 18926 | tags=59%, list=3 |
| GO_POSITI | GO_POSITIVE_REGUL | 63  | -0.3436 | -1.222  | 0.1937 | 0.442705 | 1 | 10299 | tags=33%, list=1 |
| GO_REGUL  | GO_REGULATION_OI  | 46  | -0.342  | -1.2177 | 0.1937 | 0.441613 | 1 | 5697  | tags=28%, list=1 |
| GO_REGUL  | GO_REGULATION_OI  | 15  | -0.4955 | -1.2782 | 0.1938 | 0.426013 | 1 | 9127  | tags=40%, list=1 |
| GO_POSITI | GO_POSITIVE_REGUL | 32  | -0.4536 | -1.2589 | 0.194  | 0.425436 | 1 | 6290  | tags=31%, list=1 |
| GO_LUNG   | GO_LUNG_CELL_DIF  | 23  | -0.4087 | -1.2238 | 0.194  | 0.442124 | 1 | 3835  | tags=22%, list=7 |
| GO_POSITI | GO_POSITIVE_REGUL | 38  | -0.3687 | -1.2202 | 0.194  | 0.441844 | 1 | 10299 | tags=47%, list=1 |
| GO_N_MET  | GO_N_METHYLTRAN   | 84  | -0.3864 | -1.2817 | 0.1946 | 0.423502 | 1 | 12102 | tags=35%, list=2 |
| GO_POSITI | GO_POSITIVE_REGUL | 41  | -0.4224 | -1.2768 | 0.1953 | 0.4255   | 1 | 7690  | tags=37%, list=1 |
| GO_CHEMC  | GO_CHEMOREPELLE   | 28  | -0.3664 | -1.2276 | 0.1954 | 0.439816 | 1 | 3046  | tags=25%, list=5 |
| GO_CYTOS  | GO_CYTOSOLIC_TRA  | 153 | -0.3452 | -1.2767 | 0.1956 | 0.425219 | 1 | 6767  | tags=27%, list=1 |
| GO_SIGNAL | GO_SIGNAL_TRANSL  | 19  | -0.4425 | -1.2263 | 0.1957 | 0.439925 | 1 | 15534 | tags=58%, list=2 |
| GO_ANION  | GO_ANION_CHANNE   | 86  | -0.321  | -1.2013 | 0.196  | 0.448771 | 1 | 12825 | tags=38%, list=2 |
| GO_RENAL  | GO_RENAL_SODIUM   | 23  | -0.4319 | -1.2203 | 0.1962 | 0.442338 | 1 | 3514  | tags=22%, list=6 |
| GO_NEURC  | GO_NEUROTRANSMI   | 171 | -0.3634 | -1.2774 | 0.1964 | 0.425829 | 1 | 11615 | tags=38%, list=2 |
| GO_REGUL  | GO_REGULATION_OI  | 100 | -0.3026 | -1.1942 | 0.1965 | 0.452414 | 1 | 13258 | tags=30%, list=2 |
| GO_SKELE  | GO_SKELETAL_MUSC  | 41  | -0.3468 | -1.2081 | 0.1965 | 0.446111 | 1 | 11239 | tags=37%, list=1 |
| GO_DENTA  | GO_DENTATE_GYRU   | 16  | -0.491  | -1.2516 | 0.1969 | 0.429406 | 1 | 15403 | tags=56%, list=2 |
| GO_PLACE  | GO_PLACENTA_DEVI  | 155 | -0.2841 | -1.1865 | 0.1969 | 0.455792 | 1 | 10234 | tags=30%, list=1 |
| GO_PEPTID | GO_PEPTIDYL_THRE  | 122 | -0.3409 | -1.233  | 0.1969 | 0.435457 | 1 | 12361 | tags=34%, list=2 |
| GO_MUSCL  | GO_MUSCLE_MYOSI   | 15  | -0.544  | -1.2931 | 0.1972 | 0.417932 | 1 | 7538  | tags=40%, list=1 |
| GO_EXTRA  | GO_EXTRACELLULA   | 41  | -0.5107 | -1.3236 | 0.1972 | 0.410395 | 1 | 14539 | tags=56%, list=2 |
| GO_CYCLIC | GO_CYCLIC_NUCLEC  | 199 | -0.3232 | -1.2231 | 0.1972 | 0.442583 | 1 | 20038 | tags=55%, list=3 |
| GO_PHOTO  | GO_PHOTORECEPTO   | 23  | -0.3881 | -1.1785 | 0.1973 | 0.460115 | 1 | 14353 | tags=35%, list=2 |
| GO_ATP_DI | GO_ATP_DEPENDEN   | 16  | -0.5715 | -1.3477 | 0.1977 | 0.406608 | 1 | 24050 | tags=94%, list=4 |
| GO_POSITI | GO_POSITIVE_REGUL | 18  | -0.4492 | -1.2392 | 0.1977 | 0.432898 | 1 | 10263 | tags=33%, list=1 |
| GO_NEURC  | GO_NEUROTRANSMI   | 22  | -0.4226 | -1.2426 | 0.1984 | 0.432934 | 1 | 24735 | tags=77%, list=4 |
| GO_MUSCL  | GO_MUSCLE_SYSTE   | 456 | -0.3245 | -1.2549 | 0.1984 | 0.425372 | 1 | 11874 | tags=35%, list=2 |
| GO_NEGAT  | GO_NEGATIVE_REGU  | 29  | -0.432  | -1.2802 | 0.1984 | 0.424909 | 1 | 19665 | tags=55%, list=3 |
| GO_NUCLE  | GO_NUCLEAR_RECEI  | 98  | -0.3299 | -1.2446 | 0.1985 | 0.432818 | 1 | 8314  | tags=32%, list=1 |
| GO_ACTIN  | GO_ACTIN_MONOME   | 25  | -0.4076 | -1.2428 | 0.1992 | 0.433007 | 1 | 4062  | tags=32%, list=7 |
| GO_PHOSPI | GO_PHOSPHORUS_O   | 19  | -0.4391 | -1.2336 | 0.1992 | 0.435585 | 1 | 19084 | tags=63%, list=3 |
| GO_NEGAT  | GO_NEGATIVE_REGU  | 43  | -0.3403 | -1.2015 | 0.1996 | 0.449143 | 1 | 15514 | tags=44%, list=2 |
| GO_REGUL  | GO_REGULATION_OI  | 72  | -0.3965 | -1.2628 | 0.2    | 0.424251 | 1 | 13615 | tags=39%, list=2 |
| GO_CIS_GC | GO_CIS_GOLGI_NET  | 68  | -0.3443 | -1.2246 | 0.2    | 0.441126 | 1 | 12821 | tags=31%, list=2 |
| GO_POSITI | GO_POSITIVE_REGUL | 127 | -0.3075 | -1.1992 | 0.2    | 0.450778 | 1 | 10045 | tags=31%, list=1 |
| GO_NEGAT  | GO_NEGATIVE_REGU  | 39  | -0.3735 | -1.2371 | 0.2004 | 0.43359  | 1 | 13442 | tags=36%, list=2 |
| GO_DORSA  | GO_DORSAL_VENTR   | 24  | -0.4447 | -1.2666 | 0.2004 | 0.427288 | 1 | 10490 | tags=38%, list=1 |
| GO_CARBO  | GO_CARBOHYDRATE   | 16  | -0.4589 | -1.2617 | 0.2008 | 0.424208 | 1 | 19217 | tags=69%, list=3 |
| GO_METAN  | GO_METANEPHRIC_I  | 40  | -0.416  | -1.2739 | 0.2008 | 0.425581 | 1 | 7640  | tags=35%, list=1 |
| GO_ACTOM  | GO_ACTOMYOSIN_S   | 196 | -0.3218 | -1.2279 | 0.2012 | 0.439498 | 1 | 10120 | tags=30%, list=1 |
| GO_TRANS  | GO_TRANSFORMING   | 24  | -0.4034 | -1.2336 | 0.2016 | 0.43595  | 1 | 4335  | tags=25%, list=7 |
| GO_EPHRI  | GO_EPHRIN_RECEPT  | 27  | -0.3996 | -1.2495 | 0.2024 | 0.429532 | 1 | 3198  | tags=26%, list=5 |
| GO_CAMEF  | GO_CAMERA_TYPE_I  | 123 | -0.3033 | -1.1873 | 0.2028 | 0.456128 | 1 | 14688 | tags=38%, list=2 |
| GO_LEADI  | GO_LEADING_EDGE   | 169 | -0.311  | -1.2005 | 0.2036 | 0.449154 | 1 | 13067 | tags=40%, list=2 |
| GO_GLAND  | GO_GLANDULAR_EP   | 25  | -0.4197 | -1.2387 | 0.2041 | 0.433204 | 1 | 6208  | tags=32%, list=1 |
| GO_NEURC  | GO_NEURON_PROJE   | 146 | -0.3574 | -1.2415 | 0.2044 | 0.43217  | 1 | 15388 | tags=42%, list=2 |
| GO_MYOFI  | GO_MYOFIBRIL_ASS  | 66  | -0.3943 | -1.2552 | 0.2045 | 0.425634 | 1 | 10120 | tags=35%, list=1 |
| GO_REGUL  | GO_REGULATION_OI  | 25  | -0.4322 | -1.258  | 0.2046 | 0.42584  | 1 | 11448 | tags=44%, list=2 |
| GO_AXON   | GO_AXONAL_TRANS   | 58  | -0.375  | -1.2574 | 0.2047 | 0.423747 | 1 | 4046  | tags=22%, list=7 |
| GO_ACTIV  | GO_ACTIVATION_OF  | 106 | -0.3086 | -1.2078 | 0.205  | 0.445871 | 1 | 7306  | tags=25%, list=1 |
| GO_MICRO  | GO_MICROTUBULE_I  | 157 | -0.3546 | -1.2753 | 0.2051 | 0.424798 | 1 | 14495 | tags=39%, list=2 |
| GO_CELLU  | GO_CELLULAR_GLU   | 148 | -0.2853 | -1.1736 | 0.2051 | 0.460382 | 1 | 11903 | tags=30%, list=2 |
| GO_REGUL  | GO_REGULATION_OI  | 113 | -0.2916 | -1.1686 | 0.2053 | 0.462906 | 1 | 14094 | tags=36%, list=2 |
| GO_MICRO  | GO_MICROTUBULE_I  | 33  | -0.4413 | -1.2616 | 0.2055 | 0.423953 | 1 | 8726  | tags=30%, list=1 |

|                   |                   |     |         |         |        |          |   |       |                   |
|-------------------|-------------------|-----|---------|---------|--------|----------|---|-------|-------------------|
| GO_GROWTH         | GO_GROWTH_FACTOR  | 129 | -0.3577 | -1.2528 | 0.2056 | 0.428018 | 1 | 8236  | tags=30%, list=1. |
| GO_DEMETHYLASE    | GO_DEMETHYLASE    | 36  | -0.4327 | -1.2334 | 0.2058 | 0.43506  | 1 | 13642 | tags=47%, list=2. |
| GO_RESPONSE_TO_S  | GO_RESPONSE_TO_S  | 35  | -0.3705 | -1.2268 | 0.2062 | 0.439597 | 1 | 3694  | tags=23%, list=6. |
| GO_TRANSPORT_AL   | GO_TRANSPORT_AL   | 157 | -0.353  | -1.258  | 0.2063 | 0.425504 | 1 | 8418  | tags=29%, list=1. |
| GO_RESPONSE_TO_H  | GO_RESPONSE_TO_H  | 22  | -0.3859 | -1.2127 | 0.2064 | 0.445527 | 1 | 4301  | tags=32%, list=7. |
| GO_N_GLYCAN_PRO   | GO_N_GLYCAN_PRO   | 18  | -0.4429 | -1.2094 | 0.2066 | 0.446779 | 1 | 9966  | tags=44%, list=1. |
| GO_APICAL_JUNCTI  | GO_APICAL_JUNCTI  | 137 | -0.3197 | -1.2269 | 0.2068 | 0.439938 | 1 | 2948  | tags=18%, list=5. |
| GO_SARCOMERE_OR   | GO_SARCOMERE_OR   | 44  | -0.3792 | -1.2217 | 0.207  | 0.441681 | 1 | 10120 | tags=32%, list=1. |
| GO_NEGATIVE_REGU  | GO_NEGATIVE_REGU  | 27  | -0.4049 | -1.2258 | 0.207  | 0.439664 | 1 | 18325 | tags=52%, list=3. |
| GO_NEGATIVE_REGU  | GO_NEGATIVE_REGU  | 16  | -0.4587 | -1.2309 | 0.2071 | 0.437375 | 1 | 7111  | tags=38%, list=1. |
| GO_RIBOSE_PHOSPH  | GO_RIBOSE_PHOSPH  | 389 | -0.2733 | -1.1771 | 0.2072 | 0.457942 | 1 | 9901  | tags=26%, list=1. |
| GO_WATER_HOMEOS   | GO_WATER_HOMEOS   | 79  | -0.3168 | -1.1797 | 0.2073 | 0.460488 | 1 | 15488 | tags=38%, list=2. |
| GO_POSITIVE_REGU  | GO_POSITIVE_REGU  | 25  | -0.367  | -1.1985 | 0.2079 | 0.451355 | 1 | 10444 | tags=32%, list=1. |
| GO_REGULATION_OF  | GO_REGULATION_OF  | 16  | -0.4285 | -1.2196 | 0.208  | 0.44127  | 1 | 8815  | tags=50%, list=1. |
| GO_NEUROPEPTIDE_  | GO_NEUROPEPTIDE_  | 44  | -0.3788 | -1.1949 | 0.2084 | 0.453525 | 1 | 19614 | tags=57%, list=3. |
| GO_VASCULAR_ASS   | GO_VASCULAR_ASS   | 25  | -0.4505 | -1.2459 | 0.2087 | 0.432543 | 1 | 11664 | tags=48%, list=2. |
| GO_PROTEIN_MANN   | GO_PROTEIN_MANN   | 20  | -0.446  | -1.2564 | 0.209  | 0.42441  | 1 | 22092 | tags=65%, list=3. |
| GO_REGULATION_OF  | GO_REGULATION_OF  | 89  | -0.3422 | -1.1939 | 0.209  | 0.452585 | 1 | 10366 | tags=40%, list=1. |
| GO_INORGANIC_ION  | GO_INORGANIC_ION  | 97  | -0.3062 | -1.1745 | 0.2093 | 0.459429 | 1 | 14248 | tags=36%, list=2. |
| GO_NEGATIVE_REGU  | GO_NEGATIVE_REGU  | 41  | -0.3631 | -1.213  | 0.2093 | 0.445732 | 1 | 2766  | tags=20%, list=5. |
| GO_RECEPTOR_LOC   | GO_RECEPTOR_LOC   | 55  | -0.3997 | -1.2546 | 0.2096 | 0.425675 | 1 | 7952  | tags=33%, list=1. |
| GO_REGULATION_OF  | GO_REGULATION_OF  | 19  | -0.4115 | -1.222  | 0.2099 | 0.442365 | 1 | 6700  | tags=26%, list=1. |
| GO_XENOBIOTIC_TR  | GO_XENOBIOTIC_TR  | 27  | -0.3999 | -1.2145 | 0.2102 | 0.443813 | 1 | 4349  | tags=22%, list=7. |
| GO_REGULATION_OF  | GO_REGULATION_OF  | 18  | -0.4674 | -1.2525 | 0.2104 | 0.4283   | 1 | 3968  | tags=22%, list=7. |
| GO_UTERUS_DEVEL   | GO_UTERUS_DEVEL   | 21  | -0.4184 | -1.2085 | 0.2104 | 0.44644  | 1 | 13941 | tags=38%, list=2. |
| GO_NUCLEOSOME_B   | GO_NUCLEOSOME_B   | 53  | -0.4611 | -1.3196 | 0.2108 | 0.407289 | 1 | 4301  | tags=28%, list=7. |
| GO_NEGATIVE_REGU  | GO_NEGATIVE_REGU  | 20  | -0.4224 | -1.2374 | 0.2112 | 0.433434 | 1 | 6429  | tags=30%, list=1. |
| GO_REGULATION_OF  | GO_REGULATION_OF  | 72  | -0.3477 | -1.1954 | 0.2113 | 0.452966 | 1 | 10366 | tags=42%, list=1. |
| GO_OTIC_VESICLE_I | GO_OTIC_VESICLE_I | 15  | -0.4813 | -1.2393 | 0.2114 | 0.433279 | 1 | 14539 | tags=60%, list=2. |
| GO_EMBRYONIC_PL   | GO_EMBRYONIC_PL   | 88  | -0.3101 | -1.191  | 0.2114 | 0.452908 | 1 | 10234 | tags=34%, list=1. |
| GO_ISOPRENOID_ME  | GO_ISOPRENOID_ME  | 143 | -0.297  | -1.1728 | 0.2116 | 0.459797 | 1 | 14868 | tags=35%, list=2. |
| GO_RAC_GUANYL_N   | GO_RAC_GUANYL_N   | 19  | -0.4398 | -1.2359 | 0.2123 | 0.433731 | 1 | 7772  | tags=37%, list=1. |
| GO_LEFT_RIGHT_PA  | GO_LEFT_RIGHT_PA  | 22  | -0.4116 | -1.219  | 0.2127 | 0.440838 | 1 | 14390 | tags=45%, list=2. |
| GO_REGULATION_OF  | GO_REGULATION_OF  | 100 | -0.3102 | -1.1794 | 0.2136 | 0.460746 | 1 | 11087 | tags=29%, list=1. |
| GO_LIGAND_GATED_  | GO_LIGAND_GATED_  | 139 | -0.3268 | -1.1921 | 0.2138 | 0.452436 | 1 | 14144 | tags=38%, list=2. |
| GO_NEGATIVE_REGU  | GO_NEGATIVE_REGU  | 16  | -0.4776 | -1.2578 | 0.214  | 0.425089 | 1 | 7372  | tags=44%, list=1. |
| GO_RETINOL_BINDI  | GO_RETINOL_BINDI  | 16  | -0.4391 | -1.2098 | 0.215  | 0.447024 | 1 | 14556 | tags=50%, list=2. |
| GO_RESPONSE_TO_A  | GO_RESPONSE_TO_A  | 103 | -0.2971 | -1.1691 | 0.2151 | 0.462968 | 1 | 8399  | tags=23%, list=1. |
| GO_POSITIVE_REGU  | GO_POSITIVE_REGU  | 49  | -0.3573 | -1.2023 | 0.2153 | 0.448886 | 1 | 16434 | tags=39%, list=2. |
| GO_CARTILAGE_DEV  | GO_CARTILAGE_DEV  | 29  | -0.393  | -1.199  | 0.2154 | 0.450829 | 1 | 16214 | tags=48%, list=2. |
| GO_EXOCYTIC_VESI  | GO_EXOCYTIC_VESI  | 216 | -0.3109 | -1.208  | 0.2158 | 0.446033 | 1 | 11013 | tags=34%, list=1. |
| GO_DRUG_BINDING   | GO_DRUG_BINDING   | 101 | -0.2964 | -1.1591 | 0.2158 | 0.470019 | 1 | 10550 | tags=30%, list=1. |
| GO_REGULATION_OF  | GO_REGULATION_OF  | 101 | -0.3217 | -1.1776 | 0.216  | 0.459058 | 1 | 20619 | tags=49%, list=3. |
| GO_CELL_MIGRATIO  | GO_CELL_MIGRATIO  | 100 | -0.3236 | -1.1984 | 0.2161 | 0.450855 | 1 | 15403 | tags=32%, list=2. |
| GO_CILIARY_BASE   | GO_CILIARY_BASE   | 31  | -0.4089 | -1.2424 | 0.2162 | 0.432924 | 1 | 18128 | tags=55%, list=3. |
| GO_REGULATION_OF  | GO_REGULATION_OF  | 20  | -0.3827 | -1.1799 | 0.2162 | 0.4606   | 1 | 11652 | tags=35%, list=2. |
| GO_DNA_METHYLAT   | GO_DNA_METHYLAT   | 18  | -0.4968 | -1.2692 | 0.2162 | 0.426836 | 1 | 6893  | tags=33%, list=1. |
| GO_EUKARYOTIC_48  | GO_EUKARYOTIC_48  | 15  | -0.5701 | -1.3057 | 0.2164 | 0.41366  | 1 | 4823  | tags=33%, list=8. |
| GO_BASIC_AMINO_A  | GO_BASIC_AMINO_A  | 15  | -0.4448 | -1.2147 | 0.2165 | 0.443735 | 1 | 6516  | tags=20%, list=1. |
| GO_SIN3_TYPE_COM  | GO_SIN3_TYPE_COM  | 15  | -0.5312 | -1.2826 | 0.2166 | 0.422676 | 1 | 8882  | tags=47%, list=1. |
| GO_VASCULAR_ASS   | GO_VASCULAR_ASS   | 37  | -0.3793 | -1.2097 | 0.218  | 0.446906 | 1 | 12067 | tags=32%, list=2. |
| GO_REGULATION_OF  | GO_REGULATION_OF  | 199 | -0.2839 | -1.1727 | 0.2182 | 0.459564 | 1 | 9901  | tags=30%, list=1. |
| GO_FATTY_ACYL_CC  | GO_FATTY_ACYL_CC  | 38  | -0.3613 | -1.1917 | 0.2182 | 0.452348 | 1 | 12285 | tags=37%, list=2. |
| GO_INOSITOL_PHOS  | GO_INOSITOL_PHOS  | 55  | -0.3426 | -1.2078 | 0.2184 | 0.445607 | 1 | 13788 | tags=45%, list=2. |
| GO_NEGATIVE_REGU  | GO_NEGATIVE_REGU  | 19  | -0.4025 | -1.2053 | 0.2186 | 0.447457 | 1 | 18653 | tags=42%, list=3. |
| GO_HORMONE_ACTI   | GO_HORMONE_ACTI   | 118 | -0.3096 | -1.1285 | 0.2187 | 0.485538 | 1 | 18828 | tags=40%, list=3. |
| GO_PROTEIN_DEME   | GO_PROTEIN_DEME   | 26  | -0.4833 | -1.287  | 0.2188 | 0.419609 | 1 | 13642 | tags=54%, list=2. |
| GO_SULFUR_COMPO   | GO_SULFUR_COMPO   | 187 | -0.2846 | -1.1755 | 0.2189 | 0.459815 | 1 | 9865  | tags=25%, list=1. |

|           |                   |     |         |         |        |          |   |       |                  |
|-----------|-------------------|-----|---------|---------|--------|----------|---|-------|------------------|
| GO_NEGAT  | GO_NEGATIVE_REGU  | 19  | -0.4377 | -1.211  | 0.2191 | 0.446489 | 1 | 9318  | tags=32%, list=1 |
| GO_FOREB  | GO_FOREBRAIN_GEN  | 61  | -0.3702 | -1.2025 | 0.2198 | 0.449952 | 1 | 15403 | tags=49%, list=2 |
| GO_POSIT  | GO_POSITIVE_REGU  | 83  | -0.3179 | -1.1947 | 0.2198 | 0.452578 | 1 | 7870  | tags=30%, list=1 |
| GO_GLUTA  | GO GLUTAMATE_RE   | 46  | -0.3625 | -1.2032 | 0.22   | 0.449538 | 1 | 15082 | tags=41%, list=2 |
| GO_REGUL  | GO_REGULATION_OI  | 261 | -0.2686 | -1.1376 | 0.2201 | 0.481501 | 1 | 12664 | tags=31%, list=2 |
| GO_PHOSPI | GO_PHOSPHATIDYLI  | 18  | -0.5038 | -1.2945 | 0.2202 | 0.418467 | 1 | 9535  | tags=44%, list=1 |
| GO_HYALU  | GO_HYALURONIC_A   | 22  | -0.4485 | -1.2342 | 0.2208 | 0.436027 | 1 | 13904 | tags=59%, list=2 |
| GO_HISTON | GO_HISTONE_H3_AC  | 58  | -0.3877 | -1.245  | 0.2214 | 0.433728 | 1 | 7417  | tags=31%, list=1 |
| GO_RESPO  | GO_RESPONSE_TO_M  | 19  | -0.3844 | -1.1787 | 0.2216 | 0.460587 | 1 | 22566 | tags=58%, list=3 |
| GO_REGUL  | GO_REGULATION_OI  | 82  | -0.3207 | -1.1827 | 0.222  | 0.458513 | 1 | 4326  | tags=21%, list=7 |
| GO_POSIT  | GO_POSITIVE_REGU  | 37  | -0.3633 | -1.1802 | 0.2225 | 0.460373 | 1 | 17429 | tags=46%, list=3 |
| GO_CALCII | GO_CALCIUM_ION_T  | 133 | -0.3116 | -1.1731 | 0.2227 | 0.459887 | 1 | 11394 | tags=32%, list=2 |
| GO_DETEC  | GO_DETECTION_OF_  | 74  | -0.2955 | -1.1403 | 0.2235 | 0.480682 | 1 | 18221 | tags=41%, list=3 |
| GO_REGUL  | GO_REGULATION_OI  | 248 | -0.3058 | -1.1945 | 0.2236 | 0.452478 | 1 | 11186 | tags=31%, list=1 |
| GO_GLYCO  | GO_GLYCOSAMINOC   | 219 | -0.3322 | -1.2024 | 0.224  | 0.449051 | 1 | 14201 | tags=38%, list=2 |
| GO_REGUL  | GO_REGULATION_OI  | 33  | -0.3903 | -1.2421 | 0.2241 | 0.432686 | 1 | 6954  | tags=21%, list=1 |
| GO_REGUL  | GO_REGULATION_OI  | 46  | -0.3564 | -1.2084 | 0.2243 | 0.445967 | 1 | 16180 | tags=37%, list=2 |
| GO_RESPO  | GO_RESPONSE_TO_T  | 258 | -0.2976 | -1.1959 | 0.2248 | 0.453471 | 1 | 12361 | tags=33%, list=2 |
| GO_RESPO  | GO_RESPONSE_TO_E  | 139 | -0.283  | -1.1509 | 0.2254 | 0.476927 | 1 | 11596 | tags=31%, list=2 |
| GO_CENTR  | GO_CENTRAL_NERV   | 36  | -0.3975 | -1.2159 | 0.2257 | 0.442761 | 1 | 19852 | tags=58%, list=3 |
| GO_POSIT  | GO_POSITIVE_REGU  | 22  | -0.4316 | -1.2059 | 0.2257 | 0.446743 | 1 | 1512  | tags=14%, list=3 |
| GO_AMINO  | GO_AMINO_ACID_TR  | 152 | -0.3036 | -1.1784 | 0.226  | 0.460067 | 1 | 9188  | tags=27%, list=1 |
| GO_TRANS  | GO_TRANSLATION_R  | 134 | -0.3461 | -1.2166 | 0.2261 | 0.442531 | 1 | 5882  | tags=21%, list=1 |
| GO_EPITHE | GO_EPITHELIAL_CEL | 116 | -0.3094 | -1.1868 | 0.2267 | 0.455832 | 1 | 3722  | tags=22%, list=6 |
| GO_APOLIF | GO_APOLIPOPROTEI  | 17  | -0.4252 | -1.1925 | 0.227  | 0.452426 | 1 | 10013 | tags=35%, list=1 |
| GO_CARDI  | GO_CARDIAC_MUSC   | 39  | -0.3611 | -1.1872 | 0.2276 | 0.455819 | 1 | 15888 | tags=46%, list=2 |
| GO_HSP90  | GO_HSP90_PROTEIN_ | 41  | -0.3559 | -1.2155 | 0.2277 | 0.442677 | 1 | 8021  | tags=34%, list=1 |
| GO_VASCU  | GO_VASCULAR_WOU   | 21  | -0.4437 | -1.2515 | 0.2279 | 0.429109 | 1 | 4750  | tags=29%, list=8 |
| GO_REGUL  | GO_REGULATION_OI  | 86  | -0.3296 | -1.1929 | 0.2285 | 0.452361 | 1 | 11374 | tags=31%, list=1 |
| GO_PHOSPI | GO_PHOSPHATIDYLI  | 29  | -0.4313 | -1.2577 | 0.2295 | 0.424326 | 1 | 9535  | tags=38%, list=1 |
| GO_RESPO  | GO_RESPONSE_TO_L  | 23  | -0.4041 | -1.2042 | 0.2297 | 0.449058 | 1 | 8635  | tags=30%, list=1 |
| GO_SERINE | GO_SERINE_FAMILY  | 37  | -0.3736 | -1.1948 | 0.23   | 0.452989 | 1 | 10956 | tags=32%, list=1 |
| GO_NEGAT  | GO_NEGATIVE_REGU  | 107 | -0.3467 | -1.2211 | 0.2302 | 0.441949 | 1 | 10363 | tags=33%, list=1 |
| GO_REGUL  | GO_REGULATION_OI  | 166 | -0.3208 | -1.1982 | 0.2308 | 0.450879 | 1 | 11808 | tags=34%, list=2 |
| GO_NEGAT  | GO_NEGATIVE_REGU  | 15  | -0.4203 | -1.1949 | 0.2308 | 0.453172 | 1 | 15942 | tags=53%, list=2 |
| GO_GLUTA  | GO GLUTAMINE_FA   | 27  | -0.3785 | -1.1944 | 0.2312 | 0.452412 | 1 | 10225 | tags=30%, list=1 |
| GO_RESPO  | GO_RESPONSE_TO_I  | 27  | -0.3587 | -1.1666 | 0.2314 | 0.464995 | 1 | 20508 | tags=56%, list=3 |
| GO_ORGAN  | GO_ORGANIC_ACID_  | 148 | -0.2988 | -1.1652 | 0.2319 | 0.465603 | 1 | 9901  | tags=25%, list=1 |
| GO_OXIDO  | GO_OXIDOREDUCTA   | 159 | -0.2698 | -1.1353 | 0.2322 | 0.481953 | 1 | 12188 | tags=25%, list=2 |
| GO_EMBRY  | GO_EMBRYONIC_CR   | 48  | -0.3656 | -1.211  | 0.2323 | 0.446702 | 1 | 9208  | tags=35%, list=1 |
| GO_RESPO  | GO_RESPONSE_TO_A  | 125 | -0.2985 | -1.1749 | 0.2326 | 0.459147 | 1 | 8989  | tags=27%, list=1 |
| GO_PROTE  | GO_PROTEIN_DEME   | 30  | -0.4343 | -1.2401 | 0.2329 | 0.433316 | 1 | 13642 | tags=50%, list=2 |
| GO_ANKYR  | GO_ANKYRIN_BINDI  | 20  | -0.4182 | -1.2015 | 0.2331 | 0.448792 | 1 | 18920 | tags=65%, list=3 |
| GO_IONOTI | GO_IONOTROPIC_GL  | 26  | -0.4121 | -1.1934 | 0.2331 | 0.452309 | 1 | 23732 | tags=69%, list=4 |
| GO_CHONI  | GO_CHONDROCYTE_   | 28  | -0.4297 | -1.2206 | 0.2339 | 0.44247  | 1 | 9810  | tags=39%, list=1 |
| GO_HISTON | GO_HISTONE_METH   | 54  | -0.4067 | -1.2345 | 0.2344 | 0.435886 | 1 | 11713 | tags=35%, list=2 |
| GO_PHOSPI | GO_PHOSPHOLIPID_I | 32  | -0.4118 | -1.233  | 0.2345 | 0.435124 | 1 | 9535  | tags=34%, list=1 |
| GO_REGUL  | GO_REGULATION_OI  | 42  | -0.333  | -1.1761 | 0.2354 | 0.458931 | 1 | 21540 | tags=60%, list=3 |
| GO_ORGAN  | GO_ORGANIC_ACID_  | 161 | -0.2776 | -1.1276 | 0.2355 | 0.48557  | 1 | 9176  | tags=23%, list=1 |
| GO_REGUL  | GO_REGULATION_OI  | 70  | -0.3203 | -1.1518 | 0.2359 | 0.476023 | 1 | 12323 | tags=37%, list=2 |
| GO_COLL   | GO_COLLAGEN_TRIN  | 87  | -0.4117 | -1.2503 | 0.2361 | 0.429829 | 1 | 14539 | tags=45%, list=2 |
| GO_PLASM  | GO_PLASMA_MEMBI   | 107 | -0.3191 | -1.1789 | 0.2361 | 0.460772 | 1 | 8343  | tags=32%, list=1 |
| GO_DICARI | GO_DICARBOXYLIC_  | 97  | -0.3123 | -1.1655 | 0.2361 | 0.465725 | 1 | 16390 | tags=41%, list=2 |
| GO_EPITHE | GO_EPITHELIAL_CEL | 215 | -0.2749 | -1.1405 | 0.2363 | 0.480644 | 1 | 11075 | tags=28%, list=1 |
| GO_GLOME  | GO_GLOMERULAR_M   | 16  | -0.5029 | -1.2362 | 0.2364 | 0.433641 | 1 | 11652 | tags=63%, list=2 |
| GO_NOTCH  | GO_NOTCH_SIGNALI  | 187 | -0.2716 | -1.1415 | 0.2364 | 0.479803 | 1 | 13258 | tags=30%, list=2 |
| GO_RNA_P  | GO_RNA_POLYMER    | 78  | -0.3479 | -1.206  | 0.2364 | 0.446897 | 1 | 12598 | tags=32%, list=2 |
| GO_AMEBC  | GO_AMEBOIDAL_TY   | 467 | -0.2672 | -1.1457 | 0.2364 | 0.479392 | 1 | 9908  | tags=27%, list=1 |

|           |                   |     |         |         |        |          |   |       |                  |
|-----------|-------------------|-----|---------|---------|--------|----------|---|-------|------------------|
| GO_REGUL  | GO_REGULATION_OF  | 24  | -0.4355 | -1.2109 | 0.2368 | 0.446282 | 1 | 6893  | tags=33%, list=1 |
| GO_ADREN  | GO_ADRENAL_GLAN   | 24  | -0.3732 | -1.16   | 0.2373 | 0.469997 | 1 | 13841 | tags=42%, list=2 |
| GO_PEPTID | GO_PEPTIDYL_LYSIN | 43  | -0.4107 | -1.2227 | 0.2373 | 0.442865 | 1 | 15665 | tags=49%, list=2 |
| GO_POTAS  | GO_POTASSIUM_ION  | 48  | -0.3409 | -1.1572 | 0.2373 | 0.471419 | 1 | 10114 | tags=29%, list=1 |
| GO_ANIMA  | GO_ANIMAL_ORGAN   | 24  | -0.3852 | -1.1627 | 0.2378 | 0.467302 | 1 | 17571 | tags=50%, list=3 |
| GO_TASTE  | GO_TASTE_RECEPTC  | 26  | -0.4939 | -1.2497 | 0.2379 | 0.429643 | 1 | 13202 | tags=54%, list=2 |
| GO_CERAM  | GO_CERAMIDE_BINI  | 15  | -0.4142 | -1.2012 | 0.2379 | 0.448569 | 1 | 16638 | tags=60%, list=2 |
| GO_NEGAT  | GO_NEGATIVE_REGU  | 63  | -0.3321 | -1.1947 | 0.238  | 0.4528   | 1 | 10299 | tags=32%, list=1 |
| GO_DENDR  | GO_DENDRITE_CYTC  | 34  | -0.3833 | -1.2132 | 0.2383 | 0.445627 | 1 | 23782 | tags=68%, list=4 |
| GO_EMBRY  | GO_EMBRYONIC_HE   | 23  | -0.3822 | -1.1867 | 0.2386 | 0.45577  | 1 | 10083 | tags=39%, list=1 |
| GO_POSITI | GO_POSITIVE_REGUI | 29  | -0.4267 | -1.2334 | 0.2387 | 0.435439 | 1 | 6476  | tags=34%, list=1 |
| GO_CELL_  | GO_CELL_COMMUNI   | 24  | -0.4118 | -1.1921 | 0.2387 | 0.452692 | 1 | 10114 | tags=33%, list=1 |
| GO_TAU_PI | GO_TAU_PROTEIN_K  | 22  | -0.4476 | -1.2474 | 0.2388 | 0.431447 | 1 | 3847  | tags=27%, list=7 |
| GO_ALPHA  | GO_ALPHA_AMINO_   | 64  | -0.3322 | -1.1731 | 0.2388 | 0.460183 | 1 | 7085  | tags=22%, list=1 |
| GO_MAMM   | GO_MAMMARY_GLA    | 71  | -0.2878 | -1.1574 | 0.2389 | 0.471608 | 1 | 6450  | tags=27%, list=1 |
| GO_PHOTO  | GO_PHOTORECEPTO   | 85  | -0.2962 | -1.1469 | 0.2392 | 0.479471 | 1 | 19521 | tags=41%, list=3 |
| GO_NADP_  | GO_NADP_BINDING   | 53  | -0.3406 | -1.1925 | 0.2395 | 0.452715 | 1 | 6576  | tags=23%, list=1 |
| GO_POSITI | GO_POSITIVE_REGUI | 25  | -0.4207 | -1.2199 | 0.2402 | 0.441949 | 1 | 10863 | tags=40%, list=1 |
| GO_SPERM  | GO_SPERM_MIDPIEC  | 28  | -0.3592 | -1.1506 | 0.2402 | 0.476833 | 1 | 6841  | tags=25%, list=1 |
| GO_SIALYL | GO_SIALYLATION    | 20  | -0.4332 | -1.1898 | 0.2403 | 0.454741 | 1 | 9966  | tags=35%, list=1 |
| GO_PHOTO  | GO_PHOTORECEPTO   | 57  | -0.3545 | -1.1655 | 0.2405 | 0.466031 | 1 | 15415 | tags=42%, list=2 |
| GO_2_OXO  | GO_2_OXOGLUTARA   | 15  | -0.4966 | -1.2399 | 0.2406 | 0.432834 | 1 | 11385 | tags=33%, list=1 |
| GO_CHROM  | GO_CHROMOSOME_    | 61  | -0.3785 | -1.209  | 0.2406 | 0.446258 | 1 | 17563 | tags=46%, list=3 |
| GO_POSITI | GO_POSITIVE_REGUI | 20  | -0.4646 | -1.245  | 0.241  | 0.433386 | 1 | 25975 | tags=65%, list=4 |
| GO_POSITI | GO_POSITIVE_REGUI | 81  | -0.379  | -1.2096 | 0.241  | 0.4467   | 1 | 7830  | tags=32%, list=1 |
| GO_NEGAT  | GO_NEGATIVE_REGU  | 35  | -0.3462 | -1.1682 | 0.241  | 0.463218 | 1 | 12997 | tags=46%, list=2 |
| GO_REGUL  | GO_REGULATION_OF  | 367 | -0.2723 | -1.1539 | 0.2411 | 0.474589 | 1 | 8997  | tags=26%, list=1 |
| GO_CARDI  | GO_CARDIOBLAST_I  | 18  | -0.4417 | -1.2086 | 0.2411 | 0.446708 | 1 | 15096 | tags=50%, list=2 |
| GO_HISTO  | GO_HISTONE_METH   | 17  | -0.4818 | -1.226  | 0.2412 | 0.439719 | 1 | 10083 | tags=35%, list=1 |
| GO_PROTE  | GO_PROTEOGLYCAN   | 64  | -0.3693 | -1.2041 | 0.2413 | 0.448979 | 1 | 13771 | tags=39%, list=2 |
| GO_PROTE  | GO_PROTEIN_DEPOL  | 108 | -0.3236 | -1.17   | 0.2414 | 0.462417 | 1 | 12556 | tags=32%, list=2 |
| GO_GLIAL_ | GO_GLIAL_CELL_DIF | 228 | -0.2811 | -1.1336 | 0.2417 | 0.48237  | 1 | 8692  | tags=24%, list=1 |
| GO_URONI  | GO_URONIC_ACID_M  | 23  | -0.4475 | -1.2219 | 0.2417 | 0.442161 | 1 | 7161  | tags=26%, list=1 |
| GO_ENDOP  | GO_ENDOPLASMIC_I  | 204 | -0.3121 | -1.1858 | 0.2418 | 0.455891 | 1 | 8051  | tags=25%, list=1 |
| GO_PROTE  | GO_PROTEIN_METH   | 163 | -0.3682 | -1.2367 | 0.2422 | 0.43383  | 1 | 19156 | tags=49%, list=3 |
| GO_AXONE  | GO_AXONEMAL_DYI   | 20  | -0.4224 | -1.1835 | 0.2422 | 0.458305 | 1 | 11500 | tags=40%, list=2 |
| GO_VENTR  | GO_VENTRICULAR_C  | 17  | -0.4158 | -1.1777 | 0.2424 | 0.459607 | 1 | 8882  | tags=29%, list=1 |
| GO_NEGAT  | GO_NEGATIVE_REGU  | 59  | -0.3266 | -1.1808 | 0.2426 | 0.46067  | 1 | 11099 | tags=32%, list=1 |
| GO_MRNA_  | GO_MRNA_5_SPLICE  | 23  | -0.556  | -1.294  | 0.2432 | 0.417172 | 1 | 12984 | tags=65%, list=2 |
| GO_CELLU  | GO_CELLULAR_RESF  | 26  | -0.4063 | -1.1879 | 0.2434 | 0.456391 | 1 | 22993 | tags=62%, list=3 |
| GO_SYMPC  | GO_SYMPORTER_AC   | 142 | -0.2669 | -1.1172 | 0.2436 | 0.489667 | 1 | 16401 | tags=39%, list=2 |
| GO_MICRO  | GO_MICROTUBULE_I  | 112 | -0.3535 | -1.219  | 0.2436 | 0.441211 | 1 | 7793  | tags=27%, list=1 |
| GO_NEGAT  | GO_NEGATIVE_REGU  | 23  | -0.3823 | -1.1593 | 0.2437 | 0.470059 | 1 | 17571 | tags=48%, list=3 |
| GO_RESPO  | GO_RESPONSE_TO_M  | 200 | -0.2717 | -1.1418 | 0.2438 | 0.479986 | 1 | 12041 | tags=29%, list=2 |
| GO_ENDON  | GO_ENDONUCLEASE   | 36  | -0.4021 | -1.2129 | 0.2442 | 0.445465 | 1 | 5361  | tags=25%, list=9 |
| GO_THIOE  | GO_THIOESTER_BIO  | 50  | -0.3546 | -1.1975 | 0.2444 | 0.451711 | 1 | 15930 | tags=40%, list=2 |
| GO_REGUL  | GO_REGULATION_OF  | 168 | -0.2758 | -1.1487 | 0.2447 | 0.477527 | 1 | 11628 | tags=30%, list=2 |
| GO_STRUC  | GO_STRUCTURAL_C   | 27  | -0.516  | -1.2918 | 0.2449 | 0.417686 | 1 | 10044 | tags=44%, list=1 |
| GO_VENTR  | GO_VENTRICULAR_C  | 28  | -0.3931 | -1.1822 | 0.245  | 0.459062 | 1 | 15184 | tags=43%, list=2 |
| GO_POSITI | GO_POSITIVE_REGUI | 30  | -0.3694 | -1.1863 | 0.2452 | 0.455387 | 1 | 18362 | tags=57%, list=3 |
| GO_FIBRO  | GO_FIBROBLAST_GR  | 23  | -0.3776 | -1.1877 | 0.2454 | 0.456046 | 1 | 7101  | tags=26%, list=1 |
| GO_UBIQU  | GO_UBIQUITIN_CON  | 30  | -0.3814 | -1.1961 | 0.2455 | 0.453427 | 1 | 11621 | tags=40%, list=2 |
| GO_REGUL  | GO_REGULATION_OF  | 15  | -0.4558 | -1.2072 | 0.2458 | 0.446289 | 1 | 6442  | tags=40%, list=1 |
| GO_RESPO  | GO_RESPONSE_TO_C  | 145 | -0.289  | -1.1387 | 0.2461 | 0.480193 | 1 | 11239 | tags=28%, list=1 |
| GO_MEIOT  | GO_MEIOTIC_CHROM  | 80  | -0.3688 | -1.2199 | 0.2467 | 0.441599 | 1 | 21601 | tags=54%, list=3 |
| GO_NEGAT  | GO_NEGATIVE_REGU  | 26  | -0.4086 | -1.1863 | 0.2475 | 0.455708 | 1 | 15864 | tags=42%, list=2 |
| GO_CELLU  | GO_CELLULAR_RESF  | 71  | -0.3404 | -1.1985 | 0.2481 | 0.451077 | 1 | 8635  | tags=31%, list=1 |
| GO_POSITI | GO_POSITIVE_REGUI | 15  | -0.4583 | -1.192  | 0.2485 | 0.452156 | 1 | 14514 | tags=47%, list=2 |

|            |                   |     |         |         |        |          |   |       |                  |
|------------|-------------------|-----|---------|---------|--------|----------|---|-------|------------------|
| GO_SEX_DIF | GO_SEX_DIFFERENT  | 276 | -0.2693 | -1.1387 | 0.249  | 0.480453 | 1 | 13995 | tags=33%, list=2 |
| GO_PLATELE | GO_PLATELET_MORI  | 21  | -0.3836 | -1.1732 | 0.2495 | 0.460412 | 1 | 6716  | tags=33%, list=1 |
| GO_NEGAT   | GO_NEGATIVE_REGU  | 29  | -0.3516 | -1.16   | 0.2495 | 0.469813 | 1 | 11233 | tags=28%, list=1 |
| GO_MUSCL   | GO_MUSCLE_HYPER   | 31  | -0.3563 | -1.1671 | 0.25   | 0.464549 | 1 | 11495 | tags=32%, list=2 |
| GO_VASCU   | GO_VASCULAR_END   | 48  | -0.3308 | -1.1608 | 0.25   | 0.469387 | 1 | 11210 | tags=25%, list=1 |
| GO_HISTON  | GO_HISTONE_METH   | 132 | -0.3709 | -1.2114 | 0.2505 | 0.446372 | 1 | 16651 | tags=45%, list=2 |
| GO_ODONT   | GO_ODONTOGENESI   | 89  | -0.3258 | -1.1773 | 0.2515 | 0.458943 | 1 | 10299 | tags=34%, list=1 |
| GO_FOREB   | GO_FOREBRAIN_NEU  | 51  | -0.3718 | -1.171  | 0.2515 | 0.461386 | 1 | 15008 | tags=49%, list=2 |
| GO_MUSCL   | GO_MUSCLE_CELL_F  | 239 | -0.293  | -1.1661 | 0.252  | 0.465596 | 1 | 9340  | tags=28%, list=1 |
| GO_MITOC   | GO_MITOCHONDRIO   | 45  | -0.3623 | -1.1804 | 0.2524 | 0.460215 | 1 | 5615  | tags=24%, list=1 |
| GO_RESPO   | GO_RESPONSE_TO_E  | 75  | -0.2926 | -1.1255 | 0.2524 | 0.486766 | 1 | 4349  | tags=20%, list=7 |
| GO_PEPTID  | GO_PEPTIDYL_LYSIN | 113 | -0.373  | -1.2017 | 0.2524 | 0.44913  | 1 | 16445 | tags=48%, list=2 |
| GO_REGUL   | GO_REGULATION_OF  | 32  | -0.3304 | -1.1412 | 0.2524 | 0.480011 | 1 | 8094  | tags=22%, list=1 |
| GO_EYE_P   | GO_EYE_PHOTORECI  | 35  | -0.345  | -1.1556 | 0.2526 | 0.472608 | 1 | 17875 | tags=51%, list=3 |
| GO_ENDOT   | GO_ENDOTHELIAL_C  | 191 | -0.2968 | -1.1782 | 0.253  | 0.460107 | 1 | 11210 | tags=30%, list=1 |
| GO_AXON    | GO_AXONAL_FASCIC  | 23  | -0.3974 | -1.1767 | 0.2534 | 0.458241 | 1 | 8082  | tags=30%, list=1 |
| GO_REGUL   | GO_REGULATION_OF  | 25  | -0.4229 | -1.2166 | 0.2535 | 0.442901 | 1 | 10660 | tags=36%, list=1 |
| GO_EPHRI   | GO_EPHRIN_RECEPT  | 87  | -0.3087 | -1.1541 | 0.2542 | 0.474634 | 1 | 6457  | tags=24%, list=1 |
| GO_REGUL   | GO_REGULATION_OF  | 232 | -0.3286 | -1.1955 | 0.2545 | 0.453165 | 1 | 8019  | tags=28%, list=1 |
| GO_NEGAT   | GO_NEGATIVE_REGU  | 152 | -0.2843 | -1.1241 | 0.2552 | 0.487577 | 1 | 18325 | tags=41%, list=3 |
| GO_RAC_G   | GO_RAC_GTPASE_BI  | 69  | -0.3382 | -1.1776 | 0.2559 | 0.459367 | 1 | 10477 | tags=35%, list=1 |
| GO_CILIAR  | GO_CILIARY_TRANS  | 63  | -0.3938 | -1.2167 | 0.2564 | 0.443044 | 1 | 18128 | tags=48%, list=3 |
| GO_MICRO   | GO_MICROTUBULE_C  | 29  | -0.444  | -1.2301 | 0.2568 | 0.437954 | 1 | 9173  | tags=34%, list=1 |
| GO_ACTIVI  | GO_ACTIVE_TRANSM  | 341 | -0.2545 | -1.1119 | 0.2569 | 0.491483 | 1 | 15786 | tags=36%, list=2 |
| GO_ESTAB   | GO_ESTABLISHMEN   | 214 | -0.2969 | -1.1639 | 0.2572 | 0.466068 | 1 | 12361 | tags=35%, list=2 |
| GO_INSULI  | GO_INSULIN_RECEP  | 141 | -0.2861 | -1.135  | 0.2572 | 0.481877 | 1 | 12270 | tags=31%, list=2 |
| GO_HETER   | GO_HETEROPHILIC_C | 42  | -0.3775 | -1.184  | 0.2573 | 0.45849  | 1 | 10254 | tags=38%, list=1 |
| GO_REGUL   | GO_REGULATION_OF  | 353 | -0.2737 | -1.1422 | 0.2574 | 0.479611 | 1 | 8997  | tags=26%, list=1 |
| GO_CELL    | GO_CELL_AGGREGA   | 23  | -0.4255 | -1.1699 | 0.2577 | 0.462198 | 1 | 4391  | tags=26%, list=8 |
| GO_REGUL   | GO_REGULATION_OF  | 41  | -0.3429 | -1.152  | 0.2578 | 0.475873 | 1 | 15919 | tags=41%, list=2 |
| GO_CELLU   | GO_CELLULAR_RESF  | 201 | -0.2838 | -1.1361 | 0.2581 | 0.482057 | 1 | 10247 | tags=28%, list=1 |
| GO_NEURC   | GO_NEURON_PROJEC  | 26  | -0.3857 | -1.1839 | 0.2581 | 0.458301 | 1 | 11034 | tags=50%, list=1 |
| GO_ISOPRE  | GO_ISOPRENOID_BIN | 37  | -0.3357 | -1.1172 | 0.2586 | 0.489446 | 1 | 20680 | tags=49%, list=3 |
| GO_CILIAR  | GO_CILIARY_TIP    | 45  | -0.4086 | -1.2262 | 0.259  | 0.439678 | 1 | 8248  | tags=36%, list=1 |
| GO_PHOTO   | GO_PHOTORECEPTO   | 47  | -0.326  | -1.1375 | 0.2592 | 0.48133  | 1 | 18128 | tags=49%, list=3 |
| GO_TRANS   | GO_TRANSFERASE_A  | 248 | -0.2891 | -1.1574 | 0.2597 | 0.471336 | 1 | 12756 | tags=31%, list=2 |
| GO_CELL    | GO_CELL_CELL_JUN  | 476 | -0.2689 | -1.1426 | 0.2597 | 0.480882 | 1 | 8997  | tags=25%, list=1 |
| GO_TERPE   | GO_TERPENOID_ME   | 124 | -0.2898 | -1.1277 | 0.2597 | 0.485735 | 1 | 14868 | tags=33%, list=2 |
| GO_ALPHA   | GO_ALPHA_TUBULIN  | 36  | -0.3655 | -1.1806 | 0.2604 | 0.460689 | 1 | 17190 | tags=42%, list=2 |
| GO_PHYSIC  | GO_PHYSIOLOGICAL  | 37  | -0.3475 | -1.1647 | 0.2608 | 0.466098 | 1 | 12950 | tags=35%, list=2 |
| GO_REGUL   | GO_REGULATION_OF  | 208 | -0.2721 | -1.1245 | 0.261  | 0.487253 | 1 | 11448 | tags=29%, list=2 |
| GO_REGUL   | GO_REGULATION_OF  | 15  | -0.4469 | -1.1873 | 0.2621 | 0.456366 | 1 | 10781 | tags=40%, list=1 |
| GO_VESICI  | GO_VESICLE_COAT   | 54  | -0.3572 | -1.1805 | 0.2628 | 0.460367 | 1 | 11813 | tags=37%, list=2 |
| GO_REGUL   | GO_REGULATION_OF  | 16  | -0.453  | -1.1889 | 0.2629 | 0.455209 | 1 | 6442  | tags=38%, list=1 |
| GO_STRIAT  | GO_STRIATED_MUSC  | 59  | -0.322  | -1.1448 | 0.2632 | 0.479553 | 1 | 10263 | tags=31%, list=1 |
| GO_POSITI  | GO_POSITIVE_REGUI | 25  | -0.3922 | -1.1416 | 0.2635 | 0.479999 | 1 | 15047 | tags=52%, list=2 |
| GO_FILOPC  | GO_FILOPODIUM_AS  | 58  | -0.3112 | -1.1465 | 0.2641 | 0.479439 | 1 | 8956  | tags=28%, list=1 |
| GO_ENDOR   | GO_ENDORIBONUCL   | 30  | -0.4098 | -1.1911 | 0.2647 | 0.453044 | 1 | 5361  | tags=27%, list=9 |
| GO_INORG   | GO_INORGANIC_ANI  | 120 | -0.2871 | -1.1188 | 0.2652 | 0.48942  | 1 | 15498 | tags=43%, list=2 |
| GO_MICRO   | GO_MICROTUBULE_I  | 23  | -0.4534 | -1.2186 | 0.2653 | 0.440756 | 1 | 7579  | tags=30%, list=1 |
| GO_TRANS   | GO_TRANSFORMING   | 202 | -0.2869 | -1.1462 | 0.2653 | 0.479516 | 1 | 18362 | tags=44%, list=3 |
| GO_OVULA   | GO_OVULATION      | 21  | -0.4145 | -1.1744 | 0.2655 | 0.459222 | 1 | 8274  | tags=38%, list=1 |
| GO_CIRCA   | GO_CIRCADIAN_RHY  | 215 | -0.3001 | -1.1533 | 0.2655 | 0.474636 | 1 | 12274 | tags=32%, list=2 |
| GO_RESPO   | GO_RESPONSE_TO_C  | 226 | -0.2647 | -1.1157 | 0.2655 | 0.489607 | 1 | 10951 | tags=27%, list=1 |
| GO_NEURC   | GO_NEURON_CELLU   | 32  | -0.3824 | -1.1688 | 0.2657 | 0.462918 | 1 | 18541 | tags=59%, list=3 |
| GO_LONG    | GO_LONG_CHAIN_FA  | 17  | -0.4016 | -1.1636 | 0.2661 | 0.466376 | 1 | 15873 | tags=41%, list=2 |
| GO_REGIO   | GO_REGION_OF_CYT  | 25  | -0.4097 | -1.1937 | 0.2663 | 0.452446 | 1 | 18541 | tags=40%, list=3 |
| GO_OXYGE   | GO_OXYGEN_BINDIN  | 36  | -0.3487 | -1.1496 | 0.2664 | 0.477225 | 1 | 7577  | tags=19%, list=1 |

|           |                   |     |         |         |        |          |   |       |                   |
|-----------|-------------------|-----|---------|---------|--------|----------|---|-------|-------------------|
| GO_REGUL  | GO_REGULATION_OF  | 388 | -0.2702 | -1.1261 | 0.267  | 0.486826 | 1 | 8997  | tags=26%, list=1. |
| GO_STEROI | GO_STEROID_BIOSY  | 193 | -0.2722 | -1.1315 | 0.2671 | 0.483421 | 1 | 4766  | tags=16%, list=8  |
| GO_REGUL  | GO_REGULATION_OF  | 204 | -0.2637 | -1.1105 | 0.2672 | 0.493112 | 1 | 4326  | tags=16%, list=7  |
| GO_HIPPO_ | GO_HIPPO_SIGNALIN | 44  | -0.3958 | -1.1958 | 0.2673 | 0.453042 | 1 | 13328 | tags=45%, list=2  |
| GO_RESPO  | GO_RESPONSE_TO_F  | 36  | -0.3676 | -1.1605 | 0.2673 | 0.469498 | 1 | 7165  | tags=31%, list=1. |
| GO_ACYLG  | GO_ACYLGlycerol   | 22  | -0.3846 | -1.1594 | 0.2676 | 0.470232 | 1 | 10468 | tags=27%, list=1  |
| GO_HISTO  | GO_HISTONE_LYSINI | 39  | -0.4309 | -1.2302 | 0.2676 | 0.438174 | 1 | 11713 | tags=38%, list=2  |
| GO_KERAT  | GO_KERATINOCYTE   | 19  | -0.4306 | -1.1682 | 0.2676 | 0.462944 | 1 | 9367  | tags=37%, list=1. |
| GO_NEGAT  | GO_NEGATIVE_REGU  | 24  | -0.4285 | -1.1832 | 0.2681 | 0.458116 | 1 | 12885 | tags=42%, list=2  |
| GO_REGUL  | GO_REGULATION_OF  | 34  | -0.3555 | -1.1494 | 0.2681 | 0.477331 | 1 | 13913 | tags=38%, list=2  |
| GO_PHOTO  | GO_PHOTORECEPTO   | 37  | -0.3879 | -1.1751 | 0.2682 | 0.45935  | 1 | 18128 | tags=51%, list=3  |
| GO_POSITI | GO_POSITIVE_REGUI | 15  | -0.4498 | -1.1779 | 0.2685 | 0.459548 | 1 | 9377  | tags=47%, list=1. |
| GO_POSITI | GO_POSITIVE_REGUI | 20  | -0.4071 | -1.1388 | 0.2687 | 0.480699 | 1 | 15095 | tags=45%, list=2  |
| GO_IMPORT | GO_IMPORT_INTO_C  | 227 | -0.276  | -1.1146 | 0.2687 | 0.490837 | 1 | 8452  | tags=24%, list=1. |
| GO_APICAI | GO_APICAL_JUNCTIC | 81  | -0.3192 | -1.1632 | 0.2688 | 0.466709 | 1 | 14513 | tags=40%, list=2. |
| GO_ADHER  | GO_ADHERENS_JUN   | 157 | -0.2862 | -1.1447 | 0.2692 | 0.479494 | 1 | 12361 | tags=31%, list=2  |
| GO_PHOTO  | GO_PHOTORECEPTO   | 62  | -0.3036 | -1.1171 | 0.2694 | 0.489019 | 1 | 18128 | tags=45%, list=3  |
| GO_ENDOT  | GO_ENDOTHELIAL_C  | 67  | -0.3449 | -1.1789 | 0.2695 | 0.460456 | 1 | 3722  | tags=24%, list=6  |
| GO_REGUL  | GO_REGULATION_OF  | 39  | -0.351  | -1.1462 | 0.2695 | 0.479204 | 1 | 13913 | tags=38%, list=2  |
| GO_SPLICE | GO_SPLICEOSOMAL_  | 27  | -0.4968 | -1.2196 | 0.2697 | 0.441604 | 1 | 9759  | tags=44%, list=1' |
| GO_FLUID_ | GO_FLUID_TRANSP   | 28  | -0.3724 | -1.1537 | 0.27   | 0.47425  | 1 | 12152 | tags=32%, list=2  |
| GO_CELLU  | GO_CELLULAR_GLU   | 18  | -0.475  | -1.2024 | 0.2702 | 0.449699 | 1 | 7161  | tags=28%, list=1. |
| GO_REGUL  | GO_REGULATION_OF  | 136 | -0.2844 | -1.1427 | 0.2702 | 0.480967 | 1 | 10136 | tags=27%, list=1' |
| GO_ION_G/ | GO_ION_GATED_CH/  | 42  | -0.3504 | -1.153  | 0.2702 | 0.474844 | 1 | 9297  | tags=33%, list=1. |
| GO_SIALYI | GO_SIALYLTRANSFE  | 21  | -0.412  | -1.1492 | 0.2703 | 0.477287 | 1 | 9966  | tags=33%, list=1' |
| GO_SOLUT  | GO_SOLUTE_CATION  | 32  | -0.337  | -1.1356 | 0.2703 | 0.482092 | 1 | 3579  | tags=19%, list=6  |
| GO_RESPO  | GO_RESPONSE_TO_II | 29  | -0.3318 | -1.1367 | 0.2706 | 0.482303 | 1 | 4301  | tags=24%, list=7  |
| GO_NEGAT  | GO_NEGATIVE_REGU  | 21  | -0.3815 | -1.1471 | 0.2707 | 0.479432 | 1 | 11087 | tags=43%, list=1' |
| GO_CELLU  | GO_CELLULAR_RESF  | 21  | -0.381  | -1.14   | 0.271  | 0.480478 | 1 | 7165  | tags=29%, list=1. |
| GO_REGUL  | GO_REGULATION_OF  | 19  | -0.4387 | -1.2026 | 0.2711 | 0.4502   | 1 | 12415 | tags=42%, list=2  |
| GO_WATER  | GO_WATER_TRANSP   | 21  | -0.3959 | -1.1703 | 0.2714 | 0.462282 | 1 | 11581 | tags=29%, list=2  |
| GO_FORMA  | GO_FORMATION_OF   | 16  | -0.5044 | -1.2163 | 0.2715 | 0.442655 | 1 | 4823  | tags=31%, list=8  |
| GO_NEURC  | GO_NEUROPEPTIDE_  | 33  | -0.345  | -1.1201 | 0.2717 | 0.490039 | 1 | 3611  | tags=18%, list=6  |
| GO_SPLICE | GO_SPLICEOSOMAL_  | 78  | -0.3741 | -1.1837 | 0.2717 | 0.458225 | 1 | 12984 | tags=37%, list=2  |
| GO_NEGAT  | GO_NEGATIVE_REGU  | 86  | -0.3272 | -1.1203 | 0.2718 | 0.490258 | 1 | 10853 | tags=33%, list=1' |
| GO_REGUL  | GO_REGULATION_OF  | 140 | -0.2639 | -1.104  | 0.272  | 0.494833 | 1 | 9806  | tags=28%, list=1' |
| GO_GENIT/ | GO_GENITALIA_DEV  | 47  | -0.3472 | -1.1614 | 0.2724 | 0.468854 | 1 | 13941 | tags=43%, list=2. |
| GO_CLATH  | GO_CLATHRIN_BIND  | 64  | -0.3119 | -1.1352 | 0.2725 | 0.481732 | 1 | 12130 | tags=36%, list=2  |
| GO_CELLU  | GO_CELLULAR_PRO   | 350 | -0.2657 | -1.1069 | 0.2727 | 0.494009 | 1 | 13279 | tags=29%, list=2  |
| GO_MICRO  | GO_MICROTUBULE_]  | 44  | -0.3975 | -1.1893 | 0.2729 | 0.455232 | 1 | 7793  | tags=30%, list=1. |
| GO_ORGAN  | GO_ORGANIC_ACID_  | 346 | -0.2538 | -1.098  | 0.2733 | 0.497943 | 1 | 9188  | tags=23%, list=1. |
| GO_ANDRC  | GO_ANDROGEN_REC   | 28  | -0.3678 | -1.1627 | 0.2736 | 0.46704  | 1 | 4536  | tags=29%, list=8  |
| GO_CARBO  | GO_CARBOHYDRATE   | 235 | -0.2604 | -1.1048 | 0.2736 | 0.494751 | 1 | 12527 | tags=29%, list=2  |
| GO_COSTA  | GO_COSTAMERE      | 19  | -0.4731 | -1.2084 | 0.2737 | 0.446295 | 1 | 8533  | tags=47%, list=1. |
| GO_REGUL  | GO_REGULATION_OF  | 23  | -0.3768 | -1.1537 | 0.2738 | 0.47458  | 1 | 18131 | tags=57%, list=3  |
| GO_NUCLE  | GO_NUCLEOSIDE_TR  | 339 | -0.2752 | -1.1504 | 0.2738 | 0.476788 | 1 | 11448 | tags=30%, list=2  |
| GO_POSITI | GO_POSITIVE_REGUI | 23  | -0.4368 | -1.1958 | 0.274  | 0.453269 | 1 | 19653 | tags=61%, list=3  |
| GO_N_TERI | GO_N_TERMINAL_PR  | 16  | -0.4276 | -1.1814 | 0.2741 | 0.460272 | 1 | 8564  | tags=38%, list=1. |
| GO_REGUL  | GO_REGULATION_OF  | 201 | -0.2881 | -1.1409 | 0.2744 | 0.480341 | 1 | 10490 | tags=32%, list=1. |
| GO_NEGAT  | GO_NEGATIVE_REGU  | 18  | -0.401  | -1.1643 | 0.2746 | 0.466166 | 1 | 8726  | tags=33%, list=1. |
| GO_ACTIVI | GO_ACTIVIN_BINDIN | 15  | -0.4432 | -1.1752 | 0.2752 | 0.459668 | 1 | 6239  | tags=27%, list=1  |
| GO_ALCOH  | GO_ALCOHOL_BIOSY  | 163 | -0.2887 | -1.1394 | 0.2752 | 0.480638 | 1 | 6020  | tags=19%, list=1' |
| GO_REGUL  | GO_REGULATION_OF  | 24  | -0.3901 | -1.1344 | 0.2761 | 0.481864 | 1 | 3514  | tags=21%, list=6  |
| GO_EPIDER | GO_EPIDERMIS_MOR  | 32  | -0.3829 | -1.1434 | 0.2764 | 0.480363 | 1 | 5708  | tags=25%, list=1' |
| GO_NEGAT  | GO_NEGATIVE_REGU  | 82  | -0.3244 | -1.1713 | 0.2765 | 0.461381 | 1 | 7095  | tags=26%, list=1. |
| GO_TISSUE | GO_TISSUE_MIGRAT  | 362 | -0.269  | -1.1202 | 0.2766 | 0.490064 | 1 | 10485 | tags=28%, list=1. |
| GO_ANTER  | GO_ANTEROGRADE_   | 47  | -0.3528 | -1.1729 | 0.2768 | 0.459892 | 1 | 15315 | tags=40%, list=2  |
| GO_ANDRC  | GO_ANDROGEN_REC   | 42  | -0.3575 | -1.1436 | 0.2768 | 0.480308 | 1 | 8314  | tags=31%, list=1. |



|           |                   |     |         |         |        |          |   |       |                   |
|-----------|-------------------|-----|---------|---------|--------|----------|---|-------|-------------------|
| GO_POSIT  | GO_POSITIVE_REGUL | 27  | -0.4258 | -1.178  | 0.2769 | 0.459719 | 1 | 19653 | tags=59%, list=3. |
| GO_NON_M  | GO_NON_MOTILE_C   | 52  | -0.404  | -1.2188 | 0.2771 | 0.440716 | 1 | 20204 | tags=46%, list=3. |
| GO_MIRNA  | GO_MIRNA_MEDIAT   | 97  | -0.3465 | -1.171  | 0.2773 | 0.461652 | 1 | 15529 | tags=33%, list=2  |
| GO_ENDOD  | GO_ENDODERM_DEV   | 78  | -0.3377 | -1.1575 | 0.2773 | 0.471845 | 1 | 11075 | tags=36%, list=1' |
| GO_RESPO  | GO_RESPONSE_TO_E  | 40  | -0.3229 | -1.1283 | 0.2778 | 0.485154 | 1 | 11013 | tags=33%, list=1' |
| GO_GLAND  | GO_GLANDULAR_EP   | 47  | -0.3389 | -1.1389 | 0.278  | 0.481115 | 1 | 11638 | tags=36%, list=2  |
| GO_METAN  | GO_METANEPHROS_   | 33  | -0.3544 | -1.1209 | 0.2784 | 0.489787 | 1 | 7165  | tags=30%, list=1' |
| GO_GTPAS  | GO_GTPASE_REGUL   | 300 | -0.2825 | -1.151  | 0.2784 | 0.477102 | 1 | 10059 | tags=29%, list=1' |
| GO_REGUL  | GO_REGULATION_O   | 291 | -0.2676 | -1.113  | 0.2787 | 0.490823 | 1 | 9810  | tags=26%, list=1' |
| GO_REGUL  | GO_REGULATION_O   | 39  | -0.3324 | -1.1281 | 0.2788 | 0.485194 | 1 | 10511 | tags=33%, list=1  |
| GO_CELLU  | GO_CELLULAR_RESF  | 44  | -0.3263 | -1.1259 | 0.2794 | 0.486671 | 1 | 10781 | tags=34%, list=1  |
| GO_BHLH_  | GO_BHLH_TRANSCR   | 29  | -0.3534 | -1.1394 | 0.2812 | 0.480924 | 1 | 7826  | tags=34%, list=1. |
| GO_POSIT  | GO_POSITIVE_REGUL | 16  | -0.434  | -1.1718 | 0.2813 | 0.460882 | 1 | 18299 | tags=63%, list=3  |
| GO_MICRO  | GO_MICROTUBULE    | 418 | -0.3107 | -1.175  | 0.2814 | 0.459173 | 1 | 12302 | tags=31%, list=2  |
| GO_NEURC  | GO_NEURON_FATE_   | 34  | -0.4464 | -1.1776 | 0.2814 | 0.458813 | 1 | 16459 | tags=47%, list=2  |
| GO_BIOMI  | GO_BIOMINERALIZA  | 156 | -0.295  | -1.1041 | 0.2816 | 0.495032 | 1 | 14054 | tags=42%, list=2. |
| GO_SYNAP  | GO_SYNAPTIC_VESIC | 119 | -0.3611 | -1.187  | 0.2816 | 0.455984 | 1 | 11615 | tags=37%, list=2  |
| GO_REGUL  | GO_REGULATION_O   | 23  | -0.3897 | -1.1568 | 0.2819 | 0.471754 | 1 | 10185 | tags=30%, list=1' |
| GO_FEAR_I | GO_FEAR_RESPONSE  | 41  | -0.3519 | -1.1498 | 0.2823 | 0.477281 | 1 | 15403 | tags=39%, list=2  |
| GO_PENTO  | GO_PENTOSE_METAL  | 15  | -0.4708 | -1.1772 | 0.2823 | 0.458469 | 1 | 10883 | tags=33%, list=1' |
| GO_SCAFF  | GO_SCAFFOLD_PRO   | 60  | -0.3162 | -1.1324 | 0.2823 | 0.482903 | 1 | 12320 | tags=33%, list=2  |
| GO_NUCLE  | GO_NUCLEOSIDE_BI  | 131 | -0.2893 | -1.1198 | 0.2832 | 0.48927  | 1 | 15930 | tags=35%, list=2  |
| GO_OXIDO  | GO_OXIDOREDUCTA   | 35  | -0.3538 | -1.1353 | 0.2837 | 0.482182 | 1 | 3257  | tags=17%, list=6  |
| GO_PRESY  | GO_PRESYNAPTIC_A  | 15  | -0.489  | -1.1753 | 0.284  | 0.459826 | 1 | 19869 | tags=60%, list=3. |
| GO_ENDOC  | GO_ENDOCRINE_PAI  | 45  | -0.3566 | -1.1643 | 0.284  | 0.466436 | 1 | 12398 | tags=42%, list=2  |
| GO_NUCLE  | GO_NUCLEAR_EUCH   | 25  | -0.4022 | -1.1548 | 0.2843 | 0.473714 | 1 | 12819 | tags=36%, list=2  |
| GO_MEMBI  | GO_MEMBRANE_DEI   | 88  | -0.3201 | -1.1256 | 0.2846 | 0.486828 | 1 | 11031 | tags=33%, list=1' |
| GO_HORM   | GO_HORMONE_MED.   | 195 | -0.2813 | -1.1159 | 0.2846 | 0.489762 | 1 | 10247 | tags=28%, list=1  |
| GO_SOLUT  | GO_SOLUTE_PROTO   | 20  | -0.375  | -1.1366 | 0.2849 | 0.482237 | 1 | 1420  | tags=15%, list=2  |
| GO_HOMOI  | GO_HOMOLOGOUS_C   | 53  | -0.3452 | -1.1343 | 0.2849 | 0.481755 | 1 | 12772 | tags=32%, list=2  |
| GO_POSIT  | GO_POSITIVE_REGUL | 23  | -0.383  | -1.121  | 0.2849 | 0.489892 | 1 | 554   | tags=17%, list=1' |
| GO_POSIT  | GO_POSITIVE_REGUL | 67  | -0.2987 | -1.1026 | 0.2851 | 0.495208 | 1 | 3180  | tags=19%, list=5  |
| GO_BILE_A | GO_BILE_ACID_BIOS | 37  | -0.3264 | -1.1175 | 0.2852 | 0.490196 | 1 | 9049  | tags=27%, list=1. |
| GO_POSIT  | GO_POSITIVE_REGUL | 61  | -0.3438 | -1.1424 | 0.2854 | 0.480563 | 1 | 10254 | tags=36%, list=1  |
| GO_SODIU  | GO_SODIUM_ION_EX  | 15  | -0.4135 | -1.1389 | 0.286  | 0.48092  | 1 | 14054 | tags=53%, list=2  |
| GO_REGUL  | GO_REGULATION_O   | 113 | -0.2992 | -1.1223 | 0.2863 | 0.488576 | 1 | 6421  | tags=21%, list=1  |
| GO_REGUL  | GO_REGULATION_O   | 50  | -0.3166 | -1.1132 | 0.2863 | 0.491723 | 1 | 12168 | tags=38%, list=2  |
| GO_NEGAT  | GO_NEGATIVE_REGU  | 17  | -0.3988 | -1.1357 | 0.2863 | 0.482128 | 1 | 19483 | tags=53%, list=3  |
| GO_PHOSP  | GO_PHOSPHATIDYLI  | 31  | -0.3947 | -1.1735 | 0.2871 | 0.460272 | 1 | 9535  | tags=35%, list=1. |
| GO_UBIQU  | GO_UBIQUITIN_LIKE | 36  | -0.3528 | -1.1566 | 0.2877 | 0.471064 | 1 | 11621 | tags=36%, list=2  |
| GO_NEGAT  | GO_NEGATIVE_REGU  | 18  | -0.4171 | -1.1334 | 0.2882 | 0.482313 | 1 | 8426  | tags=44%, list=1. |
| GO_CELL_I | GO_CELL_LEADING_  | 411 | -0.2739 | -1.12   | 0.2884 | 0.48974  | 1 | 10885 | tags=30%, list=1' |
| GO_REGUL  | GO_REGULATION_O   | 53  | -0.307  | -1.1169 | 0.2885 | 0.488931 | 1 | 5855  | tags=23%, list=1' |
| GO_NUCLE  | GO_NUCLEAR_LOCA   | 26  | -0.4479 | -1.1999 | 0.2886 | 0.449859 | 1 | 10044 | tags=38%, list=1' |
| GO_SUBPA  | GO_SUBPALLIUM_DI  | 24  | -0.4034 | -1.1508 | 0.2888 | 0.476801 | 1 | 24085 | tags=63%, list=4  |
| GO_NEGAT  | GO_NEGATIVE_REGU  | 39  | -0.3428 | -1.1236 | 0.289  | 0.487813 | 1 | 15095 | tags=36%, list=2  |
| GO_RETRO  | GO_RETROGRADE_T   | 83  | -0.3184 | -1.1462 | 0.2891 | 0.478897 | 1 | 6767  | tags=25%, list=1. |
| GO_RETIN  | GO_RETINOIC_ACID_ | 27  | -0.3572 | -1.1179 | 0.2891 | 0.490347 | 1 | 10781 | tags=41%, list=1. |
| GO_REGUL  | GO_REGULATION_O   | 24  | -0.3955 | -1.166  | 0.2899 | 0.465386 | 1 | 19968 | tags=46%, list=3. |
| GO_NEGAT  | GO_NEGATIVE_REGU  | 18  | -0.3975 | -1.1383 | 0.2899 | 0.480502 | 1 | 11000 | tags=39%, list=1' |
| GO_NEGAT  | GO_NEGATIVE_REGU  | 15  | -0.3892 | -1.1206 | 0.2903 | 0.490085 | 1 | 9806  | tags=47%, list=1' |
| GO_PULMC  | GO_PULMONARY_V/   | 21  | -0.4422 | -1.1879 | 0.2904 | 0.456733 | 1 | 15184 | tags=57%, list=2  |
| GO_G_PRO  | GO_G_PROTEIN_COU  | 17  | -0.386  | -1.1158 | 0.2906 | 0.489667 | 1 | 6730  | tags=29%, list=1. |
| GO_NEGAT  | GO_NEGATIVE_REGU  | 73  | -0.3136 | -1.1145 | 0.2907 | 0.490793 | 1 | 12556 | tags=32%, list=2  |
| GO_POSIT  | GO_POSITIVE_REGUL | 15  | -0.4414 | -1.1429 | 0.2908 | 0.480916 | 1 | 9641  | tags=33%, list=1' |
| GO_AXO_D  | GO_AXO_DENDRITIC  | 69  | -0.3507 | -1.1879 | 0.2913 | 0.456157 | 1 | 15315 | tags=41%, list=2  |
| GO_REGUL  | GO_REGULATION_O   | 29  | -0.3911 | -1.1476 | 0.2916 | 0.478762 | 1 | 6260  | tags=28%, list=1  |
| GO_PROTE  | GO_PROTEIN_LOCAL  | 46  | -0.3601 | -1.1425 | 0.2916 | 0.480702 | 1 | 7952  | tags=30%, list=1. |

|           |                   |     |         |         |        |          |   |       |                  |
|-----------|-------------------|-----|---------|---------|--------|----------|---|-------|------------------|
| GO_NEPHR  | GO_NEPHRON_TUBU   | 15  | -0.4153 | -1.1449 | 0.2917 | 0.479861 | 1 | 6716  | tags=40%, list=1 |
| GO_CHAN   | GO_CHANNEL_REGU   | 144 | -0.2902 | -1.1066 | 0.292  | 0.494204 | 1 | 6828  | tags=22%, list=1 |
| GO_MELAN  | GO_MELANOCYTE_D   | 25  | -0.4    | -1.1291 | 0.2941 | 0.485515 | 1 | 11664 | tags=40%, list=2 |
| GO_MYELI  | GO_MYELIN_SHEATH  | 46  | -0.3297 | -1.1261 | 0.2943 | 0.486512 | 1 | 4017  | tags=22%, list=7 |
| GO_NADPL  | GO_NADPLUS_KINAS  | 17  | -0.3818 | -1.131  | 0.2946 | 0.483369 | 1 | 9222  | tags=35%, list=1 |
| GO_DEVEL  | GO_DEVELOPMENT_   | 226 | -0.2585 | -1.0965 | 0.2947 | 0.498538 | 1 | 12116 | tags=30%, list=2 |
| GO_EPITHE | GO_EPITHELIAL_CEL | 441 | -0.2505 | -1.1001 | 0.2949 | 0.497214 | 1 | 11210 | tags=28%, list=1 |
| GO_SMALL  | GO_SMALL_SUBUNIT  | 34  | -0.4243 | -1.161  | 0.2952 | 0.469225 | 1 | 12741 | tags=41%, list=2 |
| GO_ESTAB  | GO_ESTABLISHMENT  | 47  | -0.3151 | -1.1226 | 0.2955 | 0.488408 | 1 | 13615 | tags=34%, list=2 |
| GO_NEGAT  | GO_NEGATIVE_REGU  | 26  | -0.4079 | -1.1771 | 0.2956 | 0.458224 | 1 | 18369 | tags=35%, list=3 |
| GO_PLATE  | GO_PLATELET_DERI  | 59  | -0.3533 | -1.1642 | 0.2957 | 0.465971 | 1 | 8101  | tags=31%, list=1 |
| GO_NEGAT  | GO_NEGATIVE_REGU  | 15  | -0.3842 | -1.1287 | 0.2957 | 0.485473 | 1 | 8426  | tags=40%, list=1 |
| GO_REGUL  | GO_REGULATION_OF  | 28  | -0.4343 | -1.1772 | 0.2959 | 0.45878  | 1 | 12664 | tags=50%, list=2 |
| GO_DEFINI | GO_DEFINITIVE_HEM | 21  | -0.3831 | -1.1322 | 0.2967 | 0.482534 | 1 | 5294  | tags=29%, list=9 |
| GO_ACETY  | GO_ACETYL_COA_BI  | 22  | -0.4073 | -1.1567 | 0.2969 | 0.471209 | 1 | 15930 | tags=41%, list=2 |
| GO_NEGAT  | GO_NEGATIVE_REGU  | 16  | -0.4342 | -1.1597 | 0.2972 | 0.469934 | 1 | 10431 | tags=44%, list=1 |
| GO_ESTAB  | GO_ESTABLISHMENT  | 45  | -0.3607 | -1.1467 | 0.2976 | 0.479391 | 1 | 7372  | tags=29%, list=1 |
| GO_NEGAT  | GO_NEGATIVE_REGU  | 37  | -0.3748 | -1.1453 | 0.2977 | 0.479326 | 1 | 7103  | tags=24%, list=1 |
| GO_EXOCR  | GO_EXOCRINE_SYST  | 51  | -0.3104 | -1.1121 | 0.2978 | 0.491442 | 1 | 19965 | tags=45%, list=3 |
| GO_SYNTA  | GO_SYNTAXIN_BIND  | 78  | -0.3282 | -1.1324 | 0.2981 | 0.483089 | 1 | 8341  | tags=28%, list=1 |
| GO_RESPO  | GO_RESPONSE_TO_P  | 16  | -0.4276 | -1.1522 | 0.2984 | 0.475944 | 1 | 15919 | tags=50%, list=2 |
| GO_REGUL  | GO_REGULATION_OF  | 202 | -0.2688 | -1.1073 | 0.2985 | 0.494202 | 1 | 10299 | tags=27%, list=1 |
| GO_POSIT  | GO_POSITIVE_REGUL | 15  | -0.4192 | -1.135  | 0.2998 | 0.481571 | 1 | 18362 | tags=67%, list=3 |
| GO_METAN  | GO_METANEPHRIC_I  | 26  | -0.383  | -1.133  | 0.3    | 0.482474 | 1 | 7165  | tags=35%, list=1 |
| GO_LYASE  | GO_LYASE_ACTIVIT  | 171 | -0.2795 | -1.1034 | 0.3002 | 0.494684 | 1 | 10225 | tags=25%, list=1 |
| GO_GLYCO  | GO_GLYCOPROTEIN   | 329 | -0.2677 | -1.107  | 0.3002 | 0.494237 | 1 | 13066 | tags=29%, list=2 |
| GO_PHOSPI | GO_PHOSPHORIC_DI  | 89  | -0.2867 | -1.0969 | 0.3002 | 0.498206 | 1 | 14223 | tags=36%, list=2 |
| GO_STRUC  | GO_STRUCTURAL_C   | 43  | -0.3893 | -1.1422 | 0.3006 | 0.479819 | 1 | 12596 | tags=44%, list=2 |
| GO_TRANS  | GO_TRANSLATION_I  | 50  | -0.3862 | -1.1689 | 0.301  | 0.463073 | 1 | 5882  | tags=22%, list=1 |
| GO_INWAR  | GO_INWARD_RECTIF  | 22  | -0.381  | -1.1174 | 0.3015 | 0.490013 | 1 | 8265  | tags=27%, list=1 |
| GO_REGUL  | GO_REGULATION_OF  | 26  | -0.3542 | -1.1138 | 0.3017 | 0.491324 | 1 | 22139 | tags=65%, list=3 |
| GO_REGUL  | GO_REGULATION_OF  | 32  | -0.3588 | -1.1198 | 0.3018 | 0.489578 | 1 | 694   | tags=16%, list=1 |
| GO_METAL  | GO_METALLOENDO    | 104 | -0.303  | -1.1245 | 0.3024 | 0.487535 | 1 | 11456 | tags=30%, list=2 |
| GO_SYNAP  | GO_SYNAPTIC_VESIC | 55  | -0.3555 | -1.1492 | 0.3028 | 0.477025 | 1 | 9535  | tags=38%, list=1 |
| GO_NUCLE  | GO_NUCLEAR_HORM   | 141 | -0.2963 | -1.119  | 0.3029 | 0.489594 | 1 | 8416  | tags=30%, list=1 |
| GO_ALPHA  | GO_ALPHA_ACTININ  | 27  | -0.3952 | -1.1322 | 0.303  | 0.48281  | 1 | 18359 | tags=59%, list=3 |
| GO_NADPH  | GO_NADPH_BINDINC  | 16  | -0.4102 | -1.1442 | 0.303  | 0.480054 | 1 | 8553  | tags=31%, list=1 |
| GO_REGUL  | GO_REGULATION_OF  | 93  | -0.2962 | -1.1181 | 0.3034 | 0.490375 | 1 | 3722  | tags=20%, list=6 |
| GO_REGUL  | GO_REGULATION_OF  | 178 | -0.2863 | -1.1054 | 0.3037 | 0.49458  | 1 | 9641  | tags=28%, list=1 |
| GO_REGUL  | GO_REGULATION_OF  | 19  | -0.37   | -1.1229 | 0.3038 | 0.488072 | 1 | 10943 | tags=32%, list=1 |
| GO_SPIND  | GO_SPINDLE_MIDZO  | 36  | -0.4294 | -1.2063 | 0.3039 | 0.446771 | 1 | 13727 | tags=36%, list=2 |
| GO_CELLU  | GO_CELLULAR_RESF  | 96  | -0.2966 | -1.1032 | 0.3039 | 0.494876 | 1 | 6062  | tags=19%, list=1 |
| GO_REGUL  | GO_REGULATION_OF  | 50  | -0.312  | -1.0965 | 0.3043 | 0.498268 | 1 | 16781 | tags=38%, list=2 |
| GO_APICA  | GO_APICAL_PART_O  | 421 | -0.2552 | -1.0757 | 0.3047 | 0.511363 | 1 | 9810  | tags=24%, list=1 |
| GO_EXPLO  | GO_EXPLORATION_E  | 25  | -0.3679 | -1.1149 | 0.3049 | 0.490585 | 1 | 17607 | tags=52%, list=3 |
| GO_GROW   | GO_GROWTH_FACTC   | 156 | -0.2961 | -1.0964 | 0.3054 | 0.498253 | 1 | 12526 | tags=35%, list=2 |
| GO_RESPO  | GO_RESPONSE_TO_E  | 122 | -0.2624 | -1.0735 | 0.3055 | 0.513023 | 1 | 9793  | tags=25%, list=1 |
| GO_ORGAN  | GO_ORGANELLE_INF  | 15  | -0.4202 | -1.1333 | 0.3062 | 0.482227 | 1 | 5751  | tags=27%, list=1 |
| GO_ATPASI | GO_ATPASE_BINDIN  | 84  | -0.2731 | -1.0765 | 0.3062 | 0.510556 | 1 | 9306  | tags=25%, list=1 |
| GO_COMPL  | GO_COMPLEX_OF_C   | 21  | -0.5057 | -1.1654 | 0.3071 | 0.465486 | 1 | 14539 | tags=57%, list=2 |
| GO_POSIT  | GO_POSITIVE_REGUL | 64  | -0.3227 | -1.1271 | 0.3072 | 0.48602  | 1 | 10462 | tags=36%, list=1 |
| GO_NEGAT  | GO_NEGATIVE_REGU  | 36  | -0.3381 | -1.1285 | 0.3074 | 0.485293 | 1 | 3347  | tags=22%, list=6 |
| GO KERAT  | GO KERATAN_SULF   | 33  | -0.3776 | -1.1423 | 0.3078 | 0.480111 | 1 | 8113  | tags=30%, list=1 |
| GO_FEMAL  | GO_FEMALE_GAMET   | 131 | -0.2712 | -1.0919 | 0.3084 | 0.501034 | 1 | 8726  | tags=22%, list=1 |
| GO_ACETY  | GO_ACETYLTRANSF   | 103 | -0.3307 | -1.1583 | 0.3084 | 0.470666 | 1 | 9645  | tags=29%, list=1 |
| GO_VISUA  | GO_VISUAL_BEHAVI  | 52  | -0.3225 | -1.0998 | 0.3086 | 0.496257 | 1 | 9704  | tags=29%, list=1 |
| GO_CELL_  | GO_CELL_JUNCTION  | 30  | -0.3614 | -1.1219 | 0.3091 | 0.488931 | 1 | 18638 | tags=53%, list=3 |
| GO_SENSO  | GO_SENSORY_PERCI  | 99  | -0.3121 | -1.1131 | 0.3091 | 0.491396 | 1 | 15154 | tags=42%, list=2 |

|           |                   |     |         |         |        |          |   |       |                  |
|-----------|-------------------|-----|---------|---------|--------|----------|---|-------|------------------|
| GO_REGUL  | GO_REGULATION_OF  | 31  | -0.3336 | -1.09   | 0.3102 | 0.501565 | 1 | 17429 | tags=45%, list=3 |
| GO_POSITI | GO_POSITIVE_REGUL | 37  | -0.388  | -1.1455 | 0.3102 | 0.479378 | 1 | 16562 | tags=41%, list=2 |
| GO_PROTEI | GO_PROTEIN_STABIL | 179 | -0.2708 | -1.0976 | 0.3105 | 0.497942 | 1 | 8168  | tags=23%, list=1 |
| GO_RESPON | GO_RESPONSE_TO_P  | 147 | -0.2737 | -1.0811 | 0.3106 | 0.506969 | 1 | 10013 | tags=28%, list=1 |
| GO_I_BANI | GO_I_BAND         | 139 | -0.34   | -1.1586 | 0.3106 | 0.470578 | 1 | 14188 | tags=40%, list=2 |
| GO_POSITI | GO_POSITIVE_REGUL | 90  | -0.2999 | -1.1162 | 0.3109 | 0.489542 | 1 | 10299 | tags=33%, list=1 |
| GO_GERM_  | GO_GERM_CELL_DE   | 253 | -0.2661 | -1.0852 | 0.3109 | 0.505008 | 1 | 13279 | tags=30%, list=2 |
| GO_N_TERI | GO_N_TERMINAL_PR  | 28  | -0.3756 | -1.1365 | 0.3111 | 0.482032 | 1 | 10505 | tags=36%, list=1 |
| GO_NEGAT  | GO_NEGATIVE_REGU  | 46  | -0.3005 | -1.0879 | 0.3112 | 0.50206  | 1 | 9653  | tags=30%, list=1 |
| GO_CAMP_  | GO_CAMP_METABOI   | 22  | -0.3774 | -1.113  | 0.3115 | 0.491112 | 1 | 17430 | tags=45%, list=3 |
| GO_REGUL  | GO_REGULATION_OF  | 15  | -0.4352 | -1.1481 | 0.3124 | 0.478191 | 1 | 2535  | tags=27%, list=4 |
| GO_ESTAB  | GO_ESTABLISHMEN   | 15  | -0.3858 | -1.1075 | 0.3124 | 0.494483 | 1 | 13615 | tags=40%, list=2 |
| GO_REGUL  | GO_REGULATION_OF  | 15  | -0.4011 | -1.1176 | 0.3125 | 0.490275 | 1 | 9340  | tags=33%, list=1 |
| GO_90S_PR | GO_90S_PRERIBOSO  | 26  | -0.4474 | -1.1568 | 0.3126 | 0.471422 | 1 | 3054  | tags=23%, list=5 |
| GO_NEGAT  | GO_NEGATIVE_REGU  | 66  | -0.3033 | -1.0999 | 0.3135 | 0.496252 | 1 | 22995 | tags=59%, list=3 |
| GO_EXTRA  | GO_EXTRACELLULA   | 31  | -0.3629 | -1.0958 | 0.3141 | 0.498352 | 1 | 13011 | tags=39%, list=2 |
| GO_POSITI | GO_POSITIVE_REGUL | 33  | -0.3583 | -1.1198 | 0.3145 | 0.489791 | 1 | 7579  | tags=27%, list=1 |
| GO_NEGAT  | GO_NEGATIVE_REGU  | 39  | -0.3314 | -1.1002 | 0.3146 | 0.497409 | 1 | 6429  | tags=28%, list=1 |
| GO_EXTRA  | GO_EXTRACELLULA   | 44  | -0.4192 | -1.1785 | 0.3149 | 0.460425 | 1 | 10198 | tags=41%, list=1 |
| GO_POSITI | GO_POSITIVE_REGUL | 43  | -0.3268 | -1.104  | 0.315  | 0.494638 | 1 | 3501  | tags=19%, list=6 |
| GO_RECEP  | GO_RECEPTOR_CLU   | 55  | -0.3325 | -1.1265 | 0.3153 | 0.486778 | 1 | 8836  | tags=33%, list=1 |
| GO_CELL_  | GO_CELL_CORTEX_F  | 42  | -0.3433 | -1.1082 | 0.3156 | 0.494617 | 1 | 11439 | tags=36%, list=2 |
| GO_NEURC  | GO_NEUROTRANSMI   | 41  | -0.3309 | -1.0933 | 0.3158 | 0.500075 | 1 | 8909  | tags=29%, list=1 |
| GO_BASAL  | GO_BASAL_TRANSCI  | 71  | -0.3325 | -1.1499 | 0.3161 | 0.477489 | 1 | 12067 | tags=30%, list=2 |
| GO_CHLOR  | GO_CHLORIDE_TRAN  | 110 | -0.2823 | -1.08   | 0.3167 | 0.507064 | 1 | 13975 | tags=39%, list=2 |
| GO_NEURC  | GO_NEURON_PROJE   | 87  | -0.312  | -1.119  | 0.3172 | 0.489428 | 1 | 5721  | tags=21%, list=1 |
| GO_CELL_  | GO_CELL_CELL_ADF  | 26  | -0.3477 | -1.1075 | 0.3172 | 0.494274 | 1 | 21835 | tags=54%, list=3 |
| GO_REGUL  | GO_REGULATION_OF  | 284 | -0.2598 | -1.0954 | 0.3173 | 0.498493 | 1 | 8171  | tags=23%, list=1 |
| GO_PROTEI | GO_PROTEIN_LOCAL  | 65  | -0.2966 | -1.0802 | 0.3175 | 0.507082 | 1 | 11983 | tags=38%, list=2 |
| GO_PLATEI | GO_PLATELET_ALPH  | 17  | -0.4177 | -1.1196 | 0.3176 | 0.488919 | 1 | 9024  | tags=35%, list=1 |
| GO_MULTIC | GO_MULTICELLULAR  | 76  | -0.3064 | -1.0995 | 0.3179 | 0.496187 | 1 | 15514 | tags=41%, list=2 |
| GO_REGUL  | GO_REGULATION_OF  | 24  | -0.3613 | -1.1345 | 0.3179 | 0.482104 | 1 | 3119  | tags=29%, list=5 |
| GO_HISTON | GO_HISTONE_H3_K4  | 53  | -0.404  | -1.1697 | 0.3181 | 0.462247 | 1 | 17788 | tags=51%, list=3 |
| GO_REGUL  | GO_REGULATION_OF  | 30  | -0.3504 | -1.1092 | 0.3182 | 0.494351 | 1 | 9127  | tags=33%, list=1 |
| GO_CALCIN | GO_CALCINEURIN_M  | 47  | -0.3125 | -1.096  | 0.3183 | 0.498313 | 1 | 13788 | tags=40%, list=2 |
| GO_ENDOT  | GO_ENDOTHELIAL_C  | 62  | -0.3411 | -1.1288 | 0.3185 | 0.485706 | 1 | 8947  | tags=34%, list=1 |
| GO_STEROI | GO_STEROID_HORMO  | 135 | -0.2916 | -1.0975 | 0.3185 | 0.497492 | 1 | 10247 | tags=29%, list=1 |
| GO_REGUL  | GO_REGULATION_OF  | 31  | -0.353  | -1.1082 | 0.3194 | 0.494922 | 1 | 12168 | tags=45%, list=2 |
| GO_REGUL  | GO_REGULATION_OF  | 15  | -0.4208 | -1.123  | 0.3196 | 0.488277 | 1 | 20576 | tags=53%, list=3 |
| GO_THIOES | GO_THIOESTER_MET  | 98  | -0.294  | -1.0887 | 0.32   | 0.501734 | 1 | 15930 | tags=35%, list=2 |
| GO_HIPPOC | GO_HIPPOCAMPAL_N  | 32  | -0.3722 | -1.1106 | 0.3207 | 0.4931   | 1 | 19653 | tags=53%, list=3 |
| GO_REGUL  | GO_REGULATION_OF  | 20  | -0.3465 | -1.0956 | 0.3207 | 0.498339 | 1 | 8635  | tags=30%, list=1 |
| GO_SIGNAL | GO_SIGNAL_SEQUEN  | 47  | -0.3686 | -1.14   | 0.3208 | 0.480259 | 1 | 10044 | tags=32%, list=1 |
| GO_O_ACY  | GO_O_ACYLTRANSF   | 47  | -0.3152 | -1.0915 | 0.3209 | 0.500777 | 1 | 13412 | tags=32%, list=2 |
| GO_PROTEI | GO_PROTEIN_C_TER  | 186 | -0.2767 | -1.1063 | 0.3214 | 0.493967 | 1 | 6085  | tags=22%, list=1 |
| GO_BONE_  | GO_BONE_MINERAL   | 112 | -0.2983 | -1.0843 | 0.3216 | 0.505311 | 1 | 14054 | tags=43%, list=2 |
| GO_REGUL  | GO_REGULATION_OF  | 365 | -0.2653 | -1.0727 | 0.3218 | 0.514162 | 1 | 8941  | tags=29%, list=1 |
| GO_POSITI | GO_POSITIVE_REGUL | 45  | -0.3235 | -1.0931 | 0.3219 | 0.499836 | 1 | 10299 | tags=42%, list=1 |
| GO_RESPON | GO_RESPONSE_TO_C  | 87  | -0.2827 | -1.0649 | 0.3219 | 0.519177 | 1 | 19410 | tags=46%, list=3 |
| GO_REGUL  | GO_REGULATION_OF  | 19  | -0.4233 | -1.1176 | 0.3221 | 0.490578 | 1 | 6893  | tags=37%, list=1 |
| GO_MUSCL  | GO_MUSCLE_CELL_N  | 103 | -0.3037 | -1.1046 | 0.3232 | 0.494812 | 1 | 8635  | tags=24%, list=1 |
| GO_GLIAL_ | GO_GLIAL_CELL_MIG | 53  | -0.316  | -1.0976 | 0.3233 | 0.497721 | 1 | 6187  | tags=23%, list=1 |
| GO_INSULI | GO_INSULIN_LIKE_G | 35  | -0.3278 | -1.0845 | 0.3235 | 0.50533  | 1 | 12950 | tags=34%, list=2 |
| GO_MANNOS | GO_MANNOSYLTRA    | 28  | -0.3644 | -1.1212 | 0.3237 | 0.490004 | 1 | 15915 | tags=43%, list=2 |
| GO_MUSCL  | GO_MUSCLE_FIBER_  | 56  | -0.3245 | -1.0952 | 0.3241 | 0.498551 | 1 | 9641  | tags=30%, list=1 |
| GO_MRNA_  | GO_MRNA_CIS_SPLIC | 52  | -0.3781 | -1.1293 | 0.3242 | 0.485414 | 1 | 12984 | tags=42%, list=2 |
| GO_GLUCU  | GO_GLUCURONOSYL   | 30  | -0.3591 | -1.1076 | 0.3244 | 0.494666 | 1 | 12247 | tags=37%, list=2 |
| GO_MEGAFA | GO_MEGAKARYOCY    | 70  | -0.3217 | -1.1091 | 0.3245 | 0.494155 | 1 | 10083 | tags=33%, list=1 |

|           |                   |     |         |         |        |          |   |       |                   |
|-----------|-------------------|-----|---------|---------|--------|----------|---|-------|-------------------|
| GO_REGUL  | GO_REGULATION_OF  | 101 | -0.2956 | -1.0904 | 0.3245 | 0.50154  | 1 | 8907  | tags=28%, list=1. |
| GO_NEUTR  | GO_NEUTRAL_LIPID  | 48  | -0.3243 | -1.0803 | 0.3245 | 0.507207 | 1 | 13220 | tags=33%, list=2  |
| GO_INORG  | GO_INORGANIC_ANI  | 170 | -0.2588 | -1.0618 | 0.3248 | 0.519336 | 1 | 10550 | tags=27%, list=1. |
| GO_PROTEI | GO_PROTEIN_KINAS  | 30  | -0.3345 | -1.0916 | 0.325  | 0.500902 | 1 | 13378 | tags=47%, list=2  |
| GO_PHOSPI | GO_PHOSPHOPROTEI  | 85  | -0.2939 | -1.0835 | 0.3251 | 0.505876 | 1 | 7287  | tags=28%, list=1. |
| GO_REGUL  | GO_REGULATION_OF  | 228 | -0.2602 | -1.0824 | 0.3252 | 0.506702 | 1 | 9450  | tags=25%, list=1. |
| GO_RESPO  | GO_RESPONSE_TO_S  | 340 | -0.244  | -1.063  | 0.3258 | 0.518913 | 1 | 10247 | tags=25%, list=1. |
| GO_SYNAP  | GO_SYNAPSE_MATU   | 25  | -0.4211 | -1.1309 | 0.3261 | 0.483229 | 1 | 11013 | tags=40%, list=1' |
| GO_POTAS  | GO_POTASSIUM_ION  | 16  | -0.3805 | -1.0884 | 0.3262 | 0.502074 | 1 | 15374 | tags=38%, list=2  |
| GO_REGUL  | GO_REGULATION_OF  | 17  | -0.4621 | -1.1311 | 0.3267 | 0.483571 | 1 | 7430  | tags=35%, list=1. |
| GO_HISTO  | GO_HISTONE_H3_K9  | 48  | -0.3713 | -1.1301 | 0.3269 | 0.484227 | 1 | 15678 | tags=46%, list=2  |
| GO_AMINO  | GO_AMINO_ACID_TR  | 80  | -0.3012 | -1.0888 | 0.3272 | 0.501973 | 1 | 4015  | tags=18%, list=7  |
| GO_CHROM  | GO_CHROMATIN_DN   | 89  | -0.3417 | -1.1231 | 0.3275 | 0.488388 | 1 | 5294  | tags=24%, list=9  |
| GO_POSITI | GO_POSITIVE_REGUI | 24  | -0.3842 | -1.0945 | 0.3281 | 0.498538 | 1 | 14609 | tags=46%, list=2. |
| GO_NEGAT  | GO_NEGATIVE_REGU  | 21  | -0.3526 | -1.0894 | 0.3281 | 0.501497 | 1 | 7754  | tags=38%, list=1. |
| GO_SEMAP  | GO_SEMAPHORIN_RI  | 23  | -0.3462 | -1.0921 | 0.3286 | 0.500869 | 1 | 3046  | tags=26%, list=5  |
| GO_REGUL  | GO_REGULATION_OF  | 93  | -0.2876 | -1.0793 | 0.33   | 0.507448 | 1 | 16570 | tags=39%, list=2  |
| GO_AMINO  | GO_AMINO_SUGAR_   | 39  | -0.3384 | -1.1018 | 0.3301 | 0.496302 | 1 | 8437  | tags=28%, list=1. |
| GO_INTRAC | GO_INTRACELLULAF  | 112 | -0.2979 | -1.0995 | 0.3302 | 0.496455 | 1 | 9654  | tags=28%, list=1' |
| GO_STRESS | GO_STRESS_FIBER_A | 104 | -0.294  | -1.1    | 0.3302 | 0.49703  | 1 | 9937  | tags=29%, list=1' |
| GO_REGUL  | GO_REGULATION_OF  | 64  | -0.3824 | -1.1312 | 0.3306 | 0.483607 | 1 | 7870  | tags=36%, list=1. |
| GO_THYMU  | GO_THYMUS_DEVEL   | 46  | -0.3259 | -1.1097 | 0.3307 | 0.493745 | 1 | 8398  | tags=24%, list=1. |
| GO_SODIUM | GO_SODIUM_CHANN   | 40  | -0.329  | -1.1078 | 0.3313 | 0.494729 | 1 | 10004 | tags=30%, list=1' |
| GO_SPANN  | GO_SPANNING_COM   | 19  | -0.3956 | -1.1016 | 0.3314 | 0.49613  | 1 | 13679 | tags=37%, list=2  |
| GO_HISTO  | GO_HISTONE_H3_K9  | 37  | -0.3923 | -1.1403 | 0.3314 | 0.480426 | 1 | 21001 | tags=59%, list=3  |
| GO_POSITI | GO_POSITIVE_REGUI | 110 | -0.3275 | -1.1144 | 0.332  | 0.490602 | 1 | 16983 | tags=37%, list=2  |
| GO_MIDDL  | GO_MIDDLE_EAR_M   | 20  | -0.3669 | -1.0888 | 0.332  | 0.502259 | 1 | 17220 | tags=50%, list=2' |
| GO_C2H2_2 | GO_C2H2_ZINC_FINC | 15  | -0.413  | -1.1172 | 0.332  | 0.489144 | 1 | 11652 | tags=40%, list=2  |
| GO_POSTS  | GO_POSTSYNAPTIC_  | 18  | -0.4279 | -1.1358 | 0.3321 | 0.482304 | 1 | 18541 | tags=44%, list=3  |
| GO_COLLA  | GO_COLLAGEN_FIBR  | 55  | -0.4471 | -1.178  | 0.3327 | 0.460061 | 1 | 16983 | tags=53%, list=2  |
| GO_REGUL  | GO_REGULATION_OF  | 23  | -0.3653 | -1.1058 | 0.3333 | 0.494089 | 1 | 8887  | tags=30%, list=1. |
| GO_LONG_  | GO_LONG_CHAIN_FA  | 23  | -0.3588 | -1.1037 | 0.3333 | 0.494552 | 1 | 12285 | tags=35%, list=2  |
| GO_REGUL  | GO_REGULATION_OF  | 35  | -0.3266 | -1.1014 | 0.3333 | 0.496153 | 1 | 12629 | tags=37%, list=2  |
| GO_CELL_  | GO_CELL_GROWTH    | 475 | -0.258  | -1.0961 | 0.3333 | 0.498464 | 1 | 13067 | tags=32%, list=2  |
| GO_REGUL  | GO_REGULATION_OF  | 35  | -0.3197 | -1.0847 | 0.3333 | 0.505227 | 1 | 13788 | tags=43%, list=2  |
| GO_ARGINI | GO_ARGININE_META  | 20  | -0.3634 | -1.0752 | 0.3333 | 0.511789 | 1 | 3576  | tags=20%, list=6  |
| GO_CELL_  | GO_CELL_CORTEX    | 285 | -0.2551 | -1.0647 | 0.334  | 0.519333 | 1 | 11780 | tags=30%, list=2  |
| GO_TRANS  | GO_TRANSCRIPTION  | 260 | -0.292  | -1.1066 | 0.334  | 0.493727 | 1 | 12828 | tags=34%, list=2  |
| GO_GLIOG  | GO_GLIOGENESIS    | 303 | -0.2624 | -1.0723 | 0.334  | 0.514587 | 1 | 12629 | tags=29%, list=2  |
| GO_PHOSPI | GO_PHOSPHATIDYLI  | 27  | -0.3378 | -1.0896 | 0.3346 | 0.502085 | 1 | 5751  | tags=26%, list=1' |
| GO_NEGAT  | GO_NEGATIVE_REGU  | 52  | -0.3614 | -1.1341 | 0.3346 | 0.481776 | 1 | 6879  | tags=29%, list=1. |
| GO_INSULI | GO_INSULIN_LIKE_G | 16  | -0.3823 | -1.0948 | 0.3353 | 0.498394 | 1 | 12950 | tags=50%, list=2  |
| GO_CCR4_  | GO_CCR4_NOT_COM   | 15  | -0.4462 | -1.1173 | 0.3353 | 0.489895 | 1 | 7128  | tags=33%, list=1. |
| GO_CALCII | GO_CALCIUM_ION_R  | 63  | -0.3364 | -1.1086 | 0.3354 | 0.49481  | 1 | 11615 | tags=37%, list=2  |
| GO_CALCII | GO_CALCIUM_CHAN   | 45  | -0.3469 | -1.1016 | 0.3361 | 0.496378 | 1 | 6290  | tags=22%, list=1  |
| GO_REGUL  | GO_REGULATION_OF  | 314 | -0.2765 | -1.0948 | 0.3365 | 0.498639 | 1 | 10612 | tags=31%, list=1  |
| GO_PEPTID | GO_PEPTIDE_HORMC  | 251 | -0.2515 | -1.0484 | 0.3367 | 0.526526 | 1 | 12629 | tags=31%, list=2  |
| GO_GLUTA  | GO_GLUTAMATE_RE   | 27  | -0.4351 | -1.1439 | 0.3368 | 0.480194 | 1 | 23732 | tags=70%, list=4  |
| GO_IONOTI | GO_IONOTROPIC_GL  | 19  | -0.4439 | -1.1241 | 0.3369 | 0.487336 | 1 | 23732 | tags=74%, list=4  |
| GO_ASTRO  | GO_ASTROCYTE_DIF  | 82  | -0.299  | -1.079  | 0.3373 | 0.507403 | 1 | 8426  | tags=28%, list=1. |
| GO_PHOTO  | GO_PHOTOTRANSDU   | 58  | -0.2863 | -1.0658 | 0.3373 | 0.518999 | 1 | 18221 | tags=40%, list=3  |
| GO_MITOC  | GO_MITOCHONDRIA   | 39  | -0.3271 | -1.1    | 0.3384 | 0.496489 | 1 | 3119  | tags=28%, list=5  |
| GO_NUCLE  | GO_NUCLEOSIDE_BI  | 64  | -0.3165 | -1.1038 | 0.3387 | 0.49471  | 1 | 17293 | tags=41%, list=3' |
| GO_LYMPH  | GO_LYMPH_VESSEL   | 26  | -0.3627 | -1.0739 | 0.339  | 0.513167 | 1 | 14543 | tags=46%, list=2. |
| GO_RESPO  | GO_RESPONSE_TO_F  | 89  | -0.2752 | -1.0667 | 0.3391 | 0.518729 | 1 | 11248 | tags=25%, list=1' |
| GO_NEGAT  | GO_NEGATIVE_REGU  | 18  | -0.3936 | -1.0942 | 0.3393 | 0.498773 | 1 | 10004 | tags=33%, list=1' |
| GO_NEGAT  | GO_NEGATIVE_REGU  | 47  | -0.3087 | -1.0741 | 0.3393 | 0.513014 | 1 | 15325 | tags=30%, list=2  |
| GO_POSITI | GO_POSITIVE_REGUI | 105 | -0.2916 | -1.0672 | 0.3397 | 0.518366 | 1 | 9641  | tags=28%, list=1' |

|           |                   |     |         |         |        |          |   |       |                  |
|-----------|-------------------|-----|---------|---------|--------|----------|---|-------|------------------|
| GO_STEROI | GO_STEROL_METAB   | 164 | -0.265  | -1.0748 | 0.3404 | 0.512179 | 1 | 4065  | tags=14%, list=7 |
| GO_PROTO  | GO_PROTON_TRANSI  | 108 | -0.2681 | -1.0641 | 0.3408 | 0.518619 | 1 | 12508 | tags=29%, list=2 |
| GO_LABYR  | GO_LABYRINTHINE_  | 20  | -0.3639 | -1.0911 | 0.3414 | 0.501149 | 1 | 10185 | tags=40%, list=1 |
| GO_NEGAT  | GO_NEGATIVE_REGU  | 26  | -0.37   | -1.0895 | 0.3415 | 0.501905 | 1 | 10431 | tags=35%, list=1 |
| GO_ENDOC  | GO_ENDODEOXYRIB   | 17  | -0.407  | -1.108  | 0.3431 | 0.494521 | 1 | 10581 | tags=29%, list=1 |
| GO_PROTEI | GO_PROTEIN_O_LINI | 96  | -0.289  | -1.0645 | 0.3433 | 0.518943 | 1 | 6384  | tags=19%, list=1 |
| GO_CILIUM | GO_CILIUM_ORGANI  | 367 | -0.3081 | -1.1084 | 0.3434 | 0.494753 | 1 | 13011 | tags=32%, list=2 |
| GO_NEGAT  | GO_NEGATIVE_REGU  | 94  | -0.2625 | -1.0697 | 0.3435 | 0.516767 | 1 | 12318 | tags=26%, list=2 |
| GO_ION_C  | GO_ION_CHANNEL_I  | 130 | -0.2776 | -1.0714 | 0.3436 | 0.515744 | 1 | 15356 | tags=38%, list=2 |
| GO_ENDOC  | GO_ENDODERMAL_C   | 15  | -0.3949 | -1.0879 | 0.3437 | 0.502302 | 1 | 10888 | tags=47%, list=1 |
| GO_MYOSI  | GO_MYOSIN_BINDIN  | 71  | -0.2808 | -1.0632 | 0.3439 | 0.519223 | 1 | 9192  | tags=28%, list=1 |
| GO_ORGAN  | GO_ORGANIC_HYDR   | 48  | -0.2995 | -1.0608 | 0.3443 | 0.51844  | 1 | 7107  | tags=23%, list=1 |
| GO_HISTO  | GO_HISTONE_H4_AC  | 70  | -0.3618 | -1.1362 | 0.3444 | 0.482157 | 1 | 18074 | tags=49%, list=3 |
| GO_RAL_G  | GO_RAL_GTPASE_BI  | 15  | -0.4016 | -1.1066 | 0.345  | 0.493919 | 1 | 15888 | tags=47%, list=2 |
| GO_NEGAT  | GO_NEGATIVE_REGU  | 249 | -0.246  | -1.0544 | 0.3457 | 0.521801 | 1 | 13311 | tags=32%, list=2 |
| GO_ORGAN  | GO_ORGANISM_EME   | 28  | -0.3251 | -1.0859 | 0.3458 | 0.504283 | 1 | 7793  | tags=36%, list=1 |
| GO_RHYTH  | GO_RHYTHMIC_BEH   | 50  | -0.3027 | -1.0797 | 0.3459 | 0.507277 | 1 | 7968  | tags=24%, list=1 |
| GO_VESIC  | GO_VESICLE_CARGC  | 27  | -0.3799 | -1.111  | 0.3463 | 0.492784 | 1 | 15233 | tags=44%, list=2 |
| GO_HORMO  | GO_HORMONE_RECE   | 174 | -0.2733 | -1.0701 | 0.347  | 0.5169   | 1 | 8416  | tags=28%, list=1 |
| GO_AMINO  | GO_AMINO_ACID_TR  | 89  | -0.2948 | -1.066  | 0.3472 | 0.51911  | 1 | 9176  | tags=24%, list=1 |
| GO_OXIDO  | GO_OXIDOREDUCTA   | 43  | -0.3266 | -1.0791 | 0.3478 | 0.507614 | 1 | 13276 | tags=30%, list=2 |
| GO_P53_BI | GO_P53_BINDING    | 64  | -0.3515 | -1.1104 | 0.349  | 0.492877 | 1 | 15621 | tags=42%, list=2 |
| GO_CELLU  | GO_CELLULAR_RESF  | 70  | -0.2879 | -1.0556 | 0.3504 | 0.521476 | 1 | 7789  | tags=27%, list=1 |
| GO_VENOU  | GO_VENOUS_BLOOD   | 15  | -0.4124 | -1.1131 | 0.3515 | 0.491562 | 1 | 1087  | tags=20%, list=2 |
| GO_REGUL  | GO_REGULATION_OI  | 88  | -0.3489 | -1.1168 | 0.3517 | 0.488852 | 1 | 9771  | tags=34%, list=1 |
| GO_DEVEL  | GO_DEVELOPMENTA   | 274 | -0.2621 | -1.0649 | 0.3518 | 0.519453 | 1 | 11099 | tags=27%, list=1 |
| GO_RRNA_  | GO_RRNA_TRANSCR   | 28  | -0.4132 | -1.1423 | 0.3519 | 0.480401 | 1 | 13219 | tags=39%, list=2 |
| GO_PROTEI | GO_PROTEIN_TRANS  | 67  | -0.3604 | -1.1127 | 0.3523 | 0.491001 | 1 | 12749 | tags=39%, list=2 |
| GO_ESTAB  | GO_ESTABLISHMEN   | 16  | -0.4084 | -1.103  | 0.3526 | 0.49476  | 1 | 2297  | tags=25%, list=4 |
| GO_METAN  | GO_METANEPHRIC_I  | 16  | -0.4186 | -1.0977 | 0.3534 | 0.498121 | 1 | 5634  | tags=38%, list=1 |
| GO_METAL  | GO_METALLOAMINC   | 21  | -0.3466 | -1.0705 | 0.3537 | 0.51672  | 1 | 3016  | tags=24%, list=5 |
| GO_EATIN  | GO_EATING_BEHAVI  | 33  | -0.3372 | -1.1049 | 0.354  | 0.494817 | 1 | 17571 | tags=42%, list=3 |
| GO_NEURC  | GO_NEUROMUSCUL    | 16  | -0.4055 | -1.0907 | 0.354  | 0.501313 | 1 | 7714  | tags=44%, list=1 |
| GO_PROTEI | GO_PROTEIN_DEMAI  | 19  | -0.3835 | -1.0693 | 0.3543 | 0.517068 | 1 | 11143 | tags=42%, list=1 |
| GO_REGUL  | GO_REGULATION_OI  | 15  | -0.4145 | -1.1073 | 0.3544 | 0.493907 | 1 | 7372  | tags=40%, list=1 |
| GO_FATTY  | GO_FATTY_ACID_DE  | 99  | -0.2553 | -1.0572 | 0.3545 | 0.520568 | 1 | 12285 | tags=29%, list=2 |
| GO_POSITI | GO_POSITIVE_REGUI | 47  | -0.3333 | -1.0865 | 0.3555 | 0.50358  | 1 | 9318  | tags=30%, list=1 |
| GO_IRE1_M | GO_IRE1_MEDIATED  | 65  | -0.3118 | -1.0815 | 0.3556 | 0.506913 | 1 | 7176  | tags=23%, list=1 |
| GO_TERTIA | GO_TERTIARY_ALCC  | 20  | -0.3723 | -1.0704 | 0.3566 | 0.516623 | 1 | 22074 | tags=65%, list=3 |
| GO_NEGAT  | GO_NEGATIVE_REGU  | 186 | -0.2543 | -1.0504 | 0.3569 | 0.523544 | 1 | 6461  | tags=22%, list=1 |
| GO_GANGL  | GO_GANGLION_DEV   | 16  | -0.4716 | -1.1245 | 0.3573 | 0.487797 | 1 | 7998  | tags=31%, list=1 |
| GO_NEGAT  | GO_NEGATIVE_REGU  | 49  | -0.3132 | -1.0763 | 0.3573 | 0.510573 | 1 | 12059 | tags=37%, list=2 |
| GO_BONE_  | GO_BONE_MATURA    | 20  | -0.3736 | -1.0842 | 0.358  | 0.505225 | 1 | 17571 | tags=50%, list=3 |
| GO_INTEG  | GO_INTEGRAL_COMI  | 34  | -0.362  | -1.083  | 0.358  | 0.50634  | 1 | 14389 | tags=44%, list=2 |
| GO_DNA_B  | GO_DNA_BINDING_T  | 333 | -0.2746 | -1.0811 | 0.358  | 0.50726  | 1 | 9390  | tags=26%, list=1 |
| GO_R_SMA  | GO_R_SMAD_BINDIN  | 23  | -0.3577 | -1.0821 | 0.3583 | 0.506865 | 1 | 15946 | tags=43%, list=2 |
| GO_NEGAT  | GO_NEGATIVE_REGU  | 32  | -0.3844 | -1.0933 | 0.3587 | 0.499824 | 1 | 8399  | tags=25%, list=1 |
| GO_REGUL  | GO_REGULATION_OI  | 150 | -0.2724 | -1.0633 | 0.3591 | 0.519267 | 1 | 9901  | tags=28%, list=1 |
| GO_POSITI | GO_POSITIVE_REGUI | 40  | -0.3607 | -1.1003 | 0.3594 | 0.4974   | 1 | 15109 | tags=38%, list=2 |
| GO_PEPTID | GO_PEPTIDE_LYSINE | 56  | -0.3813 | -1.1062 | 0.3595 | 0.493752 | 1 | 12756 | tags=34%, list=2 |
| GO_NEGAT  | GO_NEGATIVE_REGU  | 387 | -0.2782 | -1.0894 | 0.3596 | 0.501718 | 1 | 11099 | tags=29%, list=1 |
| GO_VASCU  | GO_VASCULAR_END   | 48  | -0.3192 | -1.0641 | 0.3597 | 0.518845 | 1 | 10523 | tags=35%, list=1 |
| GO_PURINI | GO_PURINE_CONTAI  | 430 | -0.2441 | -1.0561 | 0.36   | 0.521089 | 1 | 9901  | tags=25%, list=1 |
| GO_POSITI | GO_POSITIVE_REGUI | 37  | -0.3173 | -1.0765 | 0.3602 | 0.510812 | 1 | 10660 | tags=32%, list=1 |
| GO_INSULI | GO_INSULIN_SECRE  | 207 | -0.2506 | -1.0425 | 0.3602 | 0.529397 | 1 | 12629 | tags=32%, list=2 |
| GO_ORGAN  | GO_ORGANIC_ACID_  | 219 | -0.2534 | -1.0517 | 0.3603 | 0.523573 | 1 | 12405 | tags=30%, list=2 |
| GO_REGUL  | GO_REGULATION_OI  | 183 | -0.2751 | -1.0573 | 0.3608 | 0.52126  | 1 | 10614 | tags=28%, list=1 |
| GO_DIOXY  | GO_DIOXYGENASE_   | 88  | -0.2782 | -1.0643 | 0.3609 | 0.518778 | 1 | 12725 | tags=31%, list=2 |

|           |                   |     |         |         |        |          |   |       |                   |
|-----------|-------------------|-----|---------|---------|--------|----------|---|-------|-------------------|
| GO_REGUL  | GO_REGULATION_OF  | 20  | -0.3685 | -1.0877 | 0.3614 | 0.501973 | 1 | 8997  | tags=30%, list=1. |
| GO_POSITI | GO_POSITIVE_REGUL | 20  | -0.393  | -1.0811 | 0.3615 | 0.506753 | 1 | 2889  | tags=25%, list=5  |
| GO_SPHINC | GO_SPHINGOLIPID_E | 24  | -0.3546 | -1.0857 | 0.3618 | 0.504368 | 1 | 2672  | tags=25%, list=5  |
| GO_POSITI | GO_POSITIVE_REGUL | 99  | -0.2814 | -1.0573 | 0.3619 | 0.521046 | 1 | 13137 | tags=36%, list=2  |
| GO_INTERM | GO_INTERMEDIATE_  | 50  | -0.3164 | -1.0553 | 0.362  | 0.521067 | 1 | 7970  | tags=26%, list=1. |
| GO_ENDOP  | GO_ENDOPLASMIC_I  | 17  | -0.4143 | -1.0993 | 0.3624 | 0.496117 | 1 | 11595 | tags=29%, list=2  |
| GO_PRE_M  | GO_PRE_MRNA_BINI  | 57  | -0.3734 | -1.101  | 0.3626 | 0.496545 | 1 | 12984 | tags=42%, list=2  |
| GO_CATIO  | GO_CATION_CATION  | 26  | -0.3209 | -1.0461 | 0.3627 | 0.528001 | 1 | 15374 | tags=42%, list=2  |
| GO_GLYCO  | GO_GLYCOSYLATIO   | 253 | -0.258  | -1.0456 | 0.3631 | 0.528282 | 1 | 12832 | tags=28%, list=2  |
| GO_INTERM | GO_INTERMEDIATE_  | 15  | -0.3795 | -1.0804 | 0.3634 | 0.507364 | 1 | 13136 | tags=47%, list=2  |
| GO_CAMP_  | GO_CAMP_BINDING   | 23  | -0.3541 | -1.0623 | 0.3636 | 0.518777 | 1 | 20068 | tags=48%, list=3  |
| GO_REGUL  | GO_REGULATION_OF  | 40  | -0.3893 | -1.0949 | 0.3638 | 0.49876  | 1 | 10276 | tags=33%, list=1  |
| GO_LYSOP  | GO_LYSOPHOSPHOL   | 18  | -0.3654 | -1.0756 | 0.3642 | 0.511334 | 1 | 646   | tags=17%, list=1  |
| GO_PEPTID | GO_PEPTIDE_N_ACE  | 63  | -0.3716 | -1.1125 | 0.3642 | 0.491046 | 1 | 12756 | tags=35%, list=2  |
| GO_PRE_M  | GO_PRE_MRNA_5_SP  | 18  | -0.5452 | -1.1251 | 0.3642 | 0.487179 | 1 | 12984 | tags=72%, list=2  |
| GO_BLOOD  | GO_BLOOD_VESSEL_  | 55  | -0.3008 | -1.045  | 0.3649 | 0.528807 | 1 | 15325 | tags=31%, list=2  |
| GO_NEGAT  | GO_NEGATIVE_REGU  | 30  | -0.3218 | -1.07   | 0.3655 | 0.516686 | 1 | 7971  | tags=27%, list=1. |
| GO_GOLGI  | GO_GOLGI_CISTERN. | 91  | -0.2709 | -1.0651 | 0.3656 | 0.519791 | 1 | 8047  | tags=20%, list=1. |
| GO_LIVER_ | GO_LIVER_REGENER  | 32  | -0.3272 | -1.0632 | 0.3658 | 0.518999 | 1 | 3652  | tags=19%, list=6  |
| GO_CENTR  | GO_CENTRAL_NERV   | 26  | -0.3804 | -1.1    | 0.3661 | 0.496737 | 1 | 11108 | tags=38%, list=1' |
| GO_POSITI | GO_POSITIVE_REGUL | 40  | -0.3029 | -1.0608 | 0.3663 | 0.518919 | 1 | 7119  | tags=28%, list=1. |
| GO_POSITI | GO_POSITIVE_REGUL | 59  | -0.299  | -1.0511 | 0.3665 | 0.52435  | 1 | 9470  | tags=29%, list=1. |
| GO_REGUL  | GO_REGULATION_OF  | 184 | -0.3181 | -1.1051 | 0.3667 | 0.494711 | 1 | 10581 | tags=32%, list=1  |
| GO-NLS_BI | GO-NLS_BEARING_P  | 20  | -0.4246 | -1.1197 | 0.3667 | 0.488997 | 1 | 14625 | tags=45%, list=2  |
| GO_ATPASI | GO_ATPASE_COMPLI  | 76  | -0.3661 | -1.1045 | 0.3673 | 0.49462  | 1 | 8390  | tags=28%, list=1. |
| GO_ADREN  | GO_ADRENERGIC_RI  | 31  | -0.3525 | -1.0816 | 0.368  | 0.50709  | 1 | 19410 | tags=45%, list=3  |
| GO_REGUL  | GO_REGULATION_OF  | 35  | -0.348  | -1.0565 | 0.3682 | 0.521204 | 1 | 9470  | tags=29%, list=1. |
| GO_SERINE | GO_SERINE_FAMILY  | 17  | -0.426  | -1.069  | 0.3685 | 0.516781 | 1 | 6471  | tags=29%, list=1  |
| GO_ACTIN_ | GO_ACTIN_BINDING  | 425 | -0.2603 | -1.0315 | 0.3685 | 0.537633 | 1 | 11800 | tags=31%, list=2  |
| GO_PROTEI | GO_PROTEIN_LOCAL  | 330 | -0.2507 | -1.0612 | 0.3696 | 0.519709 | 1 | 9188  | tags=24%, list=1. |
| GO_PIRNA_ | GO_PIRNA_METABOI  | 18  | -0.3922 | -1.0591 | 0.3697 | 0.519561 | 1 | 16537 | tags=33%, list=2  |
| GO_REGUL  | GO_REGULATION_OF  | 126 | -0.2678 | -1.0554 | 0.37   | 0.521255 | 1 | 10299 | tags=26%, list=1. |
| GO_REGUL  | GO_REGULATION_OF  | 25  | -0.3494 | -1.0575 | 0.3702 | 0.521138 | 1 | 9127  | tags=36%, list=1. |
| GO_FORMA  | GO_FORMATION_OF   | 15  | -0.443  | -1.0929 | 0.3704 | 0.499824 | 1 | 11005 | tags=47%, list=1' |
| GO_NEGAT  | GO_NEGATIVE_REGU  | 20  | -0.3431 | -1.0523 | 0.3715 | 0.523078 | 1 | 9806  | tags=35%, list=1' |
| GO_GLIAL_ | GO_GLIAL_CELL_DE  | 120 | -0.2604 | -1.0395 | 0.3716 | 0.532011 | 1 | 12426 | tags=30%, list=2  |
| GO_GOLGI  | GO_GOLGI_TO_ENDC  | 15  | -0.4194 | -1.0882 | 0.3719 | 0.502029 | 1 | 15530 | tags=53%, list=2  |
| GO_ORGAN  | GO_ORGANIC_ANION  | 231 | -0.2492 | -1.043  | 0.3723 | 0.52916  | 1 | 9711  | tags=22%, list=1' |
| GO_MICRO  | GO_MICROVILLUS_A  | 17  | -0.3772 | -1.0638 | 0.373  | 0.518853 | 1 | 8740  | tags=35%, list=1. |
| GO_CYTOP  | GO_CYTOPLASMIC_M  | 62  | -0.3266 | -1.0876 | 0.3733 | 0.501868 | 1 | 4421  | tags=21%, list=8  |
| GO_VESICI | GO_VESICLE_TETHE  | 66  | -0.3078 | -1.0562 | 0.374  | 0.521224 | 1 | 5773  | tags=24%, list=1' |
| GO_HEPAR  | GO_HEPARAN_SULF,  | 26  | -0.3565 | -1.0738 | 0.3748 | 0.513116 | 1 | 17308 | tags=50%, list=3' |
| GO_POSITI | GO_POSITIVE_REGUL | 37  | -0.3399 | -1.078  | 0.375  | 0.508885 | 1 | 11248 | tags=32%, list=1' |
| GO_REGUL  | GO_REGULATION_OF  | 16  | -0.4127 | -1.0677 | 0.375  | 0.517722 | 1 | 8882  | tags=50%, list=1. |
| GO_REGUL  | GO_REGULATION_OF  | 46  | -0.3092 | -1.0593 | 0.3752 | 0.519829 | 1 | 3829  | tags=20%, list=7  |
| GO_COLUM  | GO_COLUMNAR_CUI   | 116 | -0.2842 | -1.0506 | 0.3752 | 0.524082 | 1 | 12934 | tags=32%, list=2  |
| GO_REGUL  | GO_REGULATION_OF  | 48  | -0.3472 | -1.091  | 0.376  | 0.501158 | 1 | 6594  | tags=27%, list=1  |
| GO_PEPTID | GO_PEPTIDYL_Glut  | 30  | -0.3453 | -1.0609 | 0.377  | 0.51916  | 1 | 13631 | tags=37%, list=2  |
| GO_POSITI | GO_POSITIVE_REGUL | 76  | -0.2857 | -1.0446 | 0.3776 | 0.528636 | 1 | 10045 | tags=29%, list=1' |
| GO_SODIUM | GO_SODIUM_ION_IM  | 19  | -0.3632 | -1.0504 | 0.378  | 0.523792 | 1 | 4750  | tags=21%, list=8  |
| GO_REGUL  | GO_REGULATION_OF  | 84  | -0.2883 | -1.0475 | 0.3786 | 0.52669  | 1 | 11210 | tags=24%, list=1' |
| GO_REGUL  | GO_REGULATION_OF  | 85  | -0.296  | -1.0601 | 0.3788 | 0.519342 | 1 | 7103  | tags=20%, list=1. |
| GO_STRESS | GO_STRESS_GRANUL  | 23  | -0.4078 | -1.1136 | 0.3789 | 0.491371 | 1 | 14298 | tags=43%, list=2. |
| GO_REGUL  | GO_REGULATION_OF  | 22  | -0.4122 | -1.0986 | 0.3789 | 0.497205 | 1 | 19156 | tags=59%, list=3  |
| GO_REGUL  | GO_REGULATION_OF  | 20  | -0.3675 | -1.0395 | 0.379  | 0.532254 | 1 | 8022  | tags=35%, list=1. |
| GO_DYNEIN | GO_DYNEIN_COMPL   | 20  | -0.411  | -1.0901 | 0.3794 | 0.50177  | 1 | 9173  | tags=30%, list=1. |
| GO_NUCLE  | GO_NUCLEOTIDE_DI  | 17  | -0.3737 | -1.057  | 0.3796 | 0.520669 | 1 | 2118  | tags=18%, list=4  |
| GO_CYTOP  | GO_CYTOPLASMIC_I  | 21  | -0.3832 | -1.0692 | 0.3797 | 0.51695  | 1 | 7336  | tags=38%, list=1  |

|           |                   |     |         |         |        |          |   |       |                  |
|-----------|-------------------|-----|---------|---------|--------|----------|---|-------|------------------|
| GO_RESPON | GO_RESPONSE_TO_H  | 161 | -0.286  | -1.0541 | 0.38   | 0.521671 | 1 | 10263 | tags=29%, list=1 |
| GO_CELLU  | GO_CELLULAR_RESF  | 23  | -0.3582 | -1.0692 | 0.3801 | 0.516711 | 1 | 4065  | tags=22%, list=7 |
| GO_STRUC  | GO_STRUCTURAL_C   | 101 | -0.2801 | -1.0426 | 0.3802 | 0.529548 | 1 | 12035 | tags=35%, list=2 |
| GO_POSIT  | GO_POSITIVE_REGU  | 96  | -0.2716 | -1.0449 | 0.3803 | 0.528576 | 1 | 8956  | tags=26%, list=1 |
| GO_PSEUD  | GO_PSEUDOPODIUM   | 18  | -0.3606 | -1.0572 | 0.3807 | 0.520788 | 1 | 14188 | tags=50%, list=2 |
| GO_EPIDER | GO_EPIDERMAL_GRC  | 33  | -0.3388 | -1.0669 | 0.381  | 0.518582 | 1 | 2867  | tags=18%, list=5 |
| GO_GLUTA  | GO_GLYTAMINE_FAI  | 16  | -0.366  | -1.0588 | 0.3823 | 0.51985  | 1 | 5161  | tags=25%, list=9 |
| GO_ACTIN  | GO_ACTIN_CYTOSKE  | 486 | -0.2491 | -1.028  | 0.3825 | 0.540998 | 1 | 8907  | tags=26%, list=1 |
| GO_REGUL  | GO_REGULATION_OF  | 36  | -0.3224 | -1.0584 | 0.3826 | 0.520221 | 1 | 3829  | tags=19%, list=7 |
| GO_TRANS  | GO_TRANSLATION_R  | 105 | -0.3076 | -1.0545 | 0.383  | 0.521836 | 1 | 5882  | tags=17%, list=1 |
| GO_CONTR  | GO_CONTRACTILE_F  | 236 | -0.3046 | -1.084  | 0.3832 | 0.505303 | 1 | 14372 | tags=36%, list=2 |
| GO_INTRAC | GO_INTRACELLULAF  | 43  | -0.3202 | -1.0612 | 0.3839 | 0.519438 | 1 | 11233 | tags=30%, list=1 |
| GO_GLAND  | GO_GLAND_DEVELO   | 441 | -0.2324 | -1.0372 | 0.3839 | 0.533682 | 1 | 8692  | tags=22%, list=1 |
| GO_GROW   | GO_GROWTH_PLATE   | 19  | -0.356  | -1.0414 | 0.3846 | 0.530745 | 1 | 15844 | tags=42%, list=2 |
| GO_REGUL  | GO_REGULATION_OF  | 65  | -0.3191 | -1.0531 | 0.3849 | 0.522539 | 1 | 10511 | tags=34%, list=1 |
| GO_SMAD   | GO_SMAD_BINDING   | 79  | -0.3043 | -1.0344 | 0.3853 | 0.536391 | 1 | 15946 | tags=41%, list=2 |
| GO_NEGAT  | GO_NEGATIVE_REGU  | 194 | -0.2646 | -1.0308 | 0.3854 | 0.538069 | 1 | 11813 | tags=28%, list=2 |
| GO_NUCLE  | GO_NUCLEOSOMAL    | 24  | -0.4466 | -1.1263 | 0.3855 | 0.486815 | 1 | 4301  | tags=29%, list=7 |
| GO_CELL   | GO_CELL_MATRIX_A  | 227 | -0.2784 | -1.048  | 0.3855 | 0.526138 | 1 | 5834  | tags=22%, list=1 |
| GO_DIACY  | GO_DIACYLGLYCER   | 24  | -0.3457 | -1.0522 | 0.3855 | 0.522959 | 1 | 10468 | tags=33%, list=1 |
| GO_POSIT  | GO_POSITIVE_REGU  | 37  | -0.3711 | -1.0735 | 0.386  | 0.513253 | 1 | 14474 | tags=43%, list=2 |
| GO_POSIT  | GO_POSITIVE_REGU  | 40  | -0.3211 | -1.0398 | 0.3868 | 0.53201  | 1 | 5634  | tags=23%, list=1 |
| GO_REGUL  | GO_REGULATION_OF  | 77  | -0.2867 | -1.0339 | 0.3868 | 0.536725 | 1 | 7567  | tags=26%, list=1 |
| GO_PHOSPI | GO_PHOSPHATIDYLS  | 20  | -0.3528 | -1.0483 | 0.3869 | 0.526414 | 1 | 8929  | tags=35%, list=1 |
| GO_REGUL  | GO_REGULATION_OF  | 74  | -0.2981 | -1.0665 | 0.387  | 0.518808 | 1 | 6429  | tags=22%, list=1 |
| GO_L_ALPI | GO_L_ALPHA_AMINC  | 59  | -0.3101 | -1.0388 | 0.3871 | 0.532668 | 1 | 9176  | tags=25%, list=1 |
| GO_CLATH  | GO_CLATHRIN_DEPE  | 45  | -0.3222 | -1.0623 | 0.3872 | 0.519236 | 1 | 11328 | tags=33%, list=1 |
| GO_SMOOT  | GO_SMOOTH_MUSCI   | 90  | -0.2925 | -1.0532 | 0.3874 | 0.52272  | 1 | 9996  | tags=27%, list=1 |
| GO_REGUL  | GO_REGULATION_OF  | 16  | -0.3872 | -1.0689 | 0.3876 | 0.516617 | 1 | 18948 | tags=50%, list=3 |
| GO_PHENO  | GO_PHENOL_CONTA   | 45  | -0.2927 | -1.0304 | 0.3881 | 0.538279 | 1 | 7111  | tags=22%, list=1 |
| GO_NEGAT  | GO_NEGATIVE_REGU  | 131 | -0.3421 | -1.0847 | 0.3886 | 0.505474 | 1 | 6879  | tags=27%, list=1 |
| GO_REGUL  | GO_REGULATION_OF  | 86  | -0.2994 | -1.0593 | 0.3894 | 0.520088 | 1 | 14094 | tags=41%, list=2 |
| GO_PROTE  | GO_PROTEIN_SUMO   | 80  | -0.3365 | -1.0714 | 0.39   | 0.515531 | 1 | 10731 | tags=33%, list=1 |
| GO_RESPON | GO_RESPONSE_TO_A  | 28  | -0.3426 | -1.0549 | 0.3902 | 0.521561 | 1 | 14538 | tags=50%, list=2 |
| GO_CELLU  | GO_CELLULAR_RESF  | 72  | -0.3046 | -1.0459 | 0.3902 | 0.528003 | 1 | 9450  | tags=29%, list=1 |
| GO_ALTER  | GO_ALTERNATIVE_M  | 87  | -0.3563 | -1.0592 | 0.3903 | 0.519741 | 1 | 12613 | tags=36%, list=2 |
| GO_GLYCO  | GO_GLYCOLIPID_BIN | 25  | -0.3533 | -1.0437 | 0.3904 | 0.529061 | 1 | 2672  | tags=20%, list=5 |
| GO_NEGAT  | GO_NEGATIVE_REGU  | 41  | -0.3085 | -1.0509 | 0.3912 | 0.524338 | 1 | 6700  | tags=27%, list=1 |
| GO_PREPU  | GO_PREPULSE_INHIE | 15  | -0.4421 | -1.0811 | 0.3913 | 0.506494 | 1 | 29412 | tags=93%, list=5 |
| GO_PCG_P  | GO_PCG_PROTEIN_C  | 46  | -0.3663 | -1.0611 | 0.3916 | 0.519374 | 1 | 7569  | tags=37%, list=1 |
| GO_SAGA   | GO_SAGA_TYPE_CON  | 27  | -0.3855 | -1.0794 | 0.3919 | 0.507536 | 1 | 15421 | tags=44%, list=2 |
| GO_RESPON | GO_RESPONSE_TO_T  | 225 | -0.2587 | -1.044  | 0.3921 | 0.529027 | 1 | 10263 | tags=26%, list=1 |
| GO_MITOC  | GO_MITOCHONDRIA   | 24  | -0.3346 | -1.0576 | 0.3922 | 0.521361 | 1 | 3579  | tags=17%, list=6 |
| GO_ADENY  | GO_ADENYLATE_CY   | 86  | -0.3022 | -1.0507 | 0.3924 | 0.524108 | 1 | 12323 | tags=33%, list=2 |
| GO_REGUL  | GO_REGULATION_OF  | 63  | -0.2787 | -1.021  | 0.3928 | 0.545753 | 1 | 17921 | tags=40%, list=3 |
| GO_PROTE  | GO_PROTEIN_CONTA  | 283 | -0.3075 | -1.0623 | 0.393  | 0.519017 | 1 | 9869  | tags=28%, list=1 |
| GO_REGUL  | GO_REGULATION_OF  | 25  | -0.3359 | -1.0437 | 0.3933 | 0.529295 | 1 | 6429  | tags=24%, list=1 |
| GO_PROTE  | GO_PROTEIN_DEGLY  | 26  | -0.3512 | -1.0524 | 0.3934 | 0.523166 | 1 | 11143 | tags=38%, list=1 |
| GO_POSIT  | GO_POSITIVE_REGU  | 52  | -0.2863 | -1.0413 | 0.3934 | 0.530643 | 1 | 12756 | tags=29%, list=2 |
| GO_DEMET  | GO_DEMETHYLATIO   | 69  | -0.3155 | -1.0563 | 0.3941 | 0.521312 | 1 | 14019 | tags=39%, list=2 |
| GO_SPIND  | GO_SPINDLE_LOCAL  | 49  | -0.3683 | -1.0608 | 0.3941 | 0.518722 | 1 | 10477 | tags=33%, list=1 |
| GO_EMBRY  | GO_EMBRYONIC_SK   | 97  | -0.2916 | -1.0505 | 0.3944 | 0.524025 | 1 | 9208  | tags=29%, list=1 |
| GO_MANN   | GO_MANNOSYLATIO   | 33  | -0.3468 | -1.0817 | 0.3948 | 0.507256 | 1 | 22092 | tags=58%, list=3 |
| GO_APICA  | GO_APICAL_PLASMA  | 351 | -0.2427 | -1.0268 | 0.3949 | 0.541351 | 1 | 9810  | tags=23%, list=1 |
| GO_CILIAR | GO_CILIARY_BASAL  | 140 | -0.3152 | -1.0682 | 0.3956 | 0.517195 | 1 | 18128 | tags=41%, list=3 |
| GO_POSIT  | GO_POSITIVE_REGU  | 72  | -0.2675 | -1.0202 | 0.3957 | 0.545098 | 1 | 8426  | tags=22%, list=1 |
| GO_INOSIT | GO_INOSITOL_LIPID | 194 | -0.2599 | -1.0274 | 0.3958 | 0.541138 | 1 | 7815  | tags=23%, list=1 |
| GO_P_BOD  | GO_P_BODY_ASSEMI  | 19  | -0.3943 | -1.0661 | 0.3968 | 0.519166 | 1 | 13484 | tags=53%, list=2 |

|           |                   |     |         |         |        |          |   |       |                  |
|-----------|-------------------|-----|---------|---------|--------|----------|---|-------|------------------|
| GO_PROTEI | GO_PROTEIN_LOCAL  | 29  | -0.388  | -1.0699 | 0.3976 | 0.516717 | 1 | 9146  | tags=34%, list=1 |
| GO_POSITI | GO_POSITIVE_REGUL | 25  | -0.3375 | -1.0486 | 0.398  | 0.526572 | 1 | 5232  | tags=20%, list=9 |
| GO_REGUL  | GO_REGULATION_OF  | 53  | -0.3176 | -1.0645 | 0.3981 | 0.518779 | 1 | 10083 | tags=34%, list=1 |
| GO_DNA_D  | GO_DNA_DEPENDEN   | 105 | -0.3751 | -1.0825 | 0.3984 | 0.506791 | 1 | 9177  | tags=29%, list=1 |
| GO_PROTEI | GO_PROTEIN_ACETY  | 91  | -0.3432 | -1.0775 | 0.3985 | 0.509424 | 1 | 15855 | tags=42%, list=2 |
| GO_AMMO   | GO_AMMONIUM_ION   | 25  | -0.3478 | -1.0431 | 0.3988 | 0.529223 | 1 | 22025 | tags=52%, list=3 |
| GO_ACTIN  | GO_ACTIN_FILAMEN  | 154 | -0.2639 | -1.0273 | 0.3989 | 0.541099 | 1 | 9937  | tags=28%, list=1 |
| GO_PEPTID | GO_PEPTIDYL_LYSIN | 170 | -0.3058 | -1.0542 | 0.3992 | 0.521832 | 1 | 12883 | tags=32%, list=2 |
| GO_GLYCO  | GO_GLYCOPROTEIN   | 398 | -0.24   | -1.0105 | 0.3996 | 0.55105  | 1 | 13066 | tags=28%, list=2 |
| GO_POSITI | GO_POSITIVE_REGUL | 23  | -0.3531 | -1.0646 | 0.4    | 0.519163 | 1 | 13631 | tags=48%, list=2 |
| GO_PROST  | GO_PROSTATE_GLA   | 28  | -0.3302 | -1.031  | 0.4    | 0.538268 | 1 | 7643  | tags=29%, list=1 |
| GO_CELLU  | GO_CELLULAR_CARI  | 85  | -0.2653 | -1.0237 | 0.4008 | 0.545654 | 1 | 20106 | tags=46%, list=3 |
| GO_PROTEI | GO_PROTEIN_ACETY  | 200 | -0.2981 | -1.063  | 0.4012 | 0.518738 | 1 | 12883 | tags=33%, list=2 |
| GO_REGUL  | GO_REGULATION_OF  | 22  | -0.3653 | -1.0446 | 0.4012 | 0.528847 | 1 | 19084 | tags=55%, list=3 |
| GO_REGUL  | GO_REGULATION_OF  | 493 | -0.249  | -1.047  | 0.4015 | 0.527171 | 1 | 8481  | tags=22%, list=1 |
| GO_HISTO  | GO_HISTONE_H2A_A  | 17  | -0.4289 | -1.0828 | 0.4016 | 0.506522 | 1 | 23608 | tags=71%, list=4 |
| GO_DECIDU | GO_DECIDUALIZATI  | 25  | -0.3236 | -1.0307 | 0.4016 | 0.537962 | 1 | 12819 | tags=40%, list=2 |
| GO_ACTIN  | GO_ACTIN_FILAMEN  | 53  | -0.3037 | -1.0261 | 0.4019 | 0.54188  | 1 | 12556 | tags=32%, list=2 |
| GO_NEGAT  | GO_NEGATIVE_REGU  | 304 | -0.2552 | -1.0386 | 0.4019 | 0.53275  | 1 | 7095  | tags=20%, list=1 |
| GO_TRANS  | GO_TRANSFERASE_A  | 202 | -0.283  | -1.0336 | 0.4031 | 0.53645  | 1 | 16653 | tags=37%, list=2 |
| GO_SUBST  | GO_SUBSTANTIA_NI  | 40  | -0.3218 | -1.0371 | 0.4031 | 0.533682 | 1 | 12976 | tags=38%, list=2 |
| GO_DICARI | GO_DICARBOXYLIC   | 39  | -0.3076 | -1.0258 | 0.4035 | 0.542162 | 1 | 9176  | tags=28%, list=1 |
| GO_INTRAC | GO_INTRACILIARY_I | 27  | -0.4099 | -1.0916 | 0.4035 | 0.501161 | 1 | 8248  | tags=30%, list=1 |
| GO_VESICI | GO_VESICLE_LOCAL  | 222 | -0.2741 | -1.0361 | 0.4036 | 0.535064 | 1 | 6170  | tags=21%, list=1 |
| GO_LYPHF  | GO_LYMPH_VESSEL   | 20  | -0.3766 | -1.0398 | 0.4038 | 0.532278 | 1 | 13596 | tags=50%, list=2 |
| GO_METHY  | GO_METHYLATED_H   | 68  | -0.3499 | -1.0434 | 0.4039 | 0.52922  | 1 | 16569 | tags=43%, list=2 |
| GO_REGUL  | GO_REGULATION_OF  | 416 | -0.231  | -1.0174 | 0.4042 | 0.546938 | 1 | 9049  | tags=22%, list=1 |
| GO_MEIOT  | GO_MEIOTIC_CELL   | 236 | -0.3008 | -1.0629 | 0.4043 | 0.518633 | 1 | 17789 | tags=39%, list=3 |
| GO_MEMBI  | GO_MEMBRANE_REF   | 29  | -0.327  | -1.022  | 0.4043 | 0.546633 | 1 | 3440  | tags=21%, list=6 |
| GO_POSITI | GO_POSITIVE_REGUL | 51  | -0.2952 | -1.0441 | 0.4054 | 0.529062 | 1 | 9222  | tags=29%, list=1 |
| GO_REGUL  | GO_REGULATION_OF  | 27  | -0.3713 | -1.045  | 0.4062 | 0.529015 | 1 | 15487 | tags=44%, list=2 |
| GO_CELL   | GO_CELL_SUBSTRAT  | 102 | -0.316  | -1.0611 | 0.4071 | 0.519107 | 1 | 8218  | tags=29%, list=1 |
| GO_POSITI | GO_POSITIVE_REGUL | 31  | -0.3128 | -1.0214 | 0.4079 | 0.54653  | 1 | 13311 | tags=32%, list=2 |
| GO_NEGAT  | GO_NEGATIVE_REGU  | 58  | -0.2685 | -1.0205 | 0.4082 | 0.545118 | 1 | 11823 | tags=24%, list=2 |
| GO_POSTS  | GO_POSTSYNAPTIC   | 21  | -0.3394 | -1.02   | 0.409  | 0.545145 | 1 | 11765 | tags=33%, list=2 |
| GO_PEPTID | GO_PEPTIDYL_LYSIN | 382 | -0.2926 | -1.0554 | 0.4093 | 0.521489 | 1 | 13852 | tags=34%, list=2 |
| GO_EYE_P  | GO_EYE_PHOTORECI  | 46  | -0.2852 | -1.0128 | 0.4097 | 0.54953  | 1 | 17875 | tags=43%, list=3 |
| GO_MRNA   | GO_MRNA_3_UTR_BI  | 115 | -0.2926 | -1.0316 | 0.41   | 0.537879 | 1 | 16716 | tags=33%, list=2 |
| GO_REGUL  | GO_REGULATION_OF  | 28  | -0.361  | -1.0294 | 0.41   | 0.539391 | 1 | 9858  | tags=36%, list=1 |
| GO_NEGAT  | GO_NEGATIVE_REGU  | 22  | -0.3323 | -1.021  | 0.4102 | 0.545484 | 1 | 6746  | tags=18%, list=1 |
| GO_NEGAT  | GO_NEGATIVE_REGU  | 15  | -0.3835 | -1.0525 | 0.4103 | 0.523279 | 1 | 8740  | tags=27%, list=1 |
| GO_POSITI | GO_POSITIVE_REGUL | 30  | -0.3264 | -1.0296 | 0.4113 | 0.539235 | 1 | 12130 | tags=30%, list=2 |
| GO_POSITI | GO_POSITIVE_REGUL | 16  | -0.3968 | -1.0269 | 0.4115 | 0.54133  | 1 | 17806 | tags=56%, list=3 |
| GO_SALIV  | GO_SALIVARY_GLA   | 39  | -0.2999 | -1.0115 | 0.4132 | 0.550936 | 1 | 19965 | tags=46%, list=3 |
| GO_CELLU  | GO_CELLULAR_RESF  | 120 | -0.302  | -1.0222 | 0.4136 | 0.546428 | 1 | 10263 | tags=32%, list=1 |
| GO_RNA_S  | GO_RNA_SPLICING   | 15  | -0.4221 | -1.0596 | 0.4138 | 0.519785 | 1 | 1292  | tags=13%, list=2 |
| GO_NEGAT  | GO_NEGATIVE_REGU  | 39  | -0.298  | -1.0278 | 0.4139 | 0.540627 | 1 | 8882  | tags=28%, list=1 |
| GO_POSITI | GO_POSITIVE_REGUL | 88  | -0.2939 | -1.0224 | 0.4144 | 0.546456 | 1 | 9573  | tags=31%, list=1 |
| GO_REGUL  | GO_REGULATION_OF  | 23  | -0.3948 | -1.0382 | 0.4145 | 0.532734 | 1 | 14054 | tags=43%, list=2 |
| GO_REGUL  | GO_REGULATION_OF  | 28  | -0.3566 | -1.0326 | 0.4148 | 0.536717 | 1 | 12474 | tags=39%, list=2 |
| GO_REGUL  | GO_REGULATION_OF  | 123 | -0.2764 | -1.0179 | 0.415  | 0.546242 | 1 | 4258  | tags=19%, list=7 |
| GO_ADIPO  | GO_ADIPOSE_TISSUE | 41  | -0.3074 | -1.0385 | 0.4154 | 0.532625 | 1 | 13607 | tags=37%, list=2 |
| GO_RETIN  | GO_RETINOIC_ACID  | 20  | -0.3438 | -1.0193 | 0.4155 | 0.54587  | 1 | 11709 | tags=30%, list=2 |
| GO_DETEC  | GO_DETECTION_OF   | 28  | -0.358  | -1.0168 | 0.4157 | 0.546974 | 1 | 24987 | tags=57%, list=4 |
| GO_RIBON  | GO_RIBONUCLEOPR   | 226 | -0.292  | -1.032  | 0.4159 | 0.537455 | 1 | 14074 | tags=33%, list=2 |
| GO_DETEC  | GO_DETECTION_OF   | 19  | -0.3383 | -1.0287 | 0.4159 | 0.539921 | 1 | 19521 | tags=42%, list=3 |
| GO_RETRO  | GO_RETROGRADE_V   | 85  | -0.3088 | -1.038  | 0.4162 | 0.532784 | 1 | 15233 | tags=36%, list=2 |
| GO_RESPO  | GO_RESPONSE_TO_X  | 31  | -0.3187 | -1.0079 | 0.4165 | 0.553074 | 1 | 9146  | tags=29%, list=1 |



|           |                   |     |         |         |        |          |   |       |                  |
|-----------|-------------------|-----|---------|---------|--------|----------|---|-------|------------------|
| GO_KINESI | GO_KINESIN_BINDIN | 41  | -0.3495 | -1.0432 | 0.4165 | 0.529386 | 1 | 15530 | tags=41%, list=2 |
| GO_SYNAP  | GO_SYNAPTIC_VESIC | 101 | -0.312  | -1.0329 | 0.4174 | 0.536762 | 1 | 13475 | tags=41%, list=2 |
| GO_ACETY  | GO_ACETYLGALACT   | 45  | -0.3097 | -1.0149 | 0.4182 | 0.549006 | 1 | 13406 | tags=33%, list=2 |
| GO_MICRO  | GO_MICROVILLUS_C  | 25  | -0.3787 | -1.0337 | 0.4185 | 0.536528 | 1 | 9629  | tags=36%, list=1 |
| GO_N_ACY  | GO_N_ACYLTRANSF   | 98  | -0.3045 | -1.048  | 0.4194 | 0.526365 | 1 | 12756 | tags=33%, list=2 |
| GO_LONG_  | GO_LONG_TERM_ME   | 34  | -0.3255 | -1.0066 | 0.4204 | 0.553365 | 1 | 7944  | tags=29%, list=1 |
| GO_CHROM  | GO_CHROMOSOME_    | 91  | -0.3513 | -1.0688 | 0.4208 | 0.516424 | 1 | 17523 | tags=41%, list=3 |
| GO_STRIAT | GO_STRIATED_MUSC  | 54  | -0.2837 | -1.0168 | 0.4209 | 0.54678  | 1 | 11495 | tags=33%, list=2 |
| GO_SNARE  | GO_SNARE_BINDING  | 114 | -0.2798 | -1.0184 | 0.4211 | 0.545931 | 1 | 8423  | tags=28%, list=1 |
| GO_DENDR  | GO_DENDRITE_EXTE  | 35  | -0.3461 | -1.0213 | 0.4216 | 0.546382 | 1 | 10105 | tags=31%, list=1 |
| GO_NEGAT  | GO_NEGATIVE_REGU  | 60  | -0.3593 | -1.056  | 0.4221 | 0.521041 | 1 | 11360 | tags=33%, list=1 |
| GO_COLLA  | GO_COLLAGEN_ACT   | 15  | -0.4046 | -1.0332 | 0.4225 | 0.536496 | 1 | 8211  | tags=40%, list=1 |
| GO_PROLIN | GO_PROLINE_RICH_I | 17  | -0.3649 | -1.0338 | 0.4226 | 0.536551 | 1 | 8997  | tags=41%, list=1 |
| GO_NEGAT  | GO_NEGATIVE_REGU  | 34  | -0.369  | -1.0613 | 0.4226 | 0.519898 | 1 | 13631 | tags=38%, list=2 |
| GO_REGUL  | GO_REGULATION_OI  | 175 | -0.2454 | -1.0135 | 0.4233 | 0.549516 | 1 | 8956  | tags=23%, list=1 |
| GO_INTRAC | GO_INTRACILIARY_I | 52  | -0.3651 | -1.065  | 0.4235 | 0.519576 | 1 | 8248  | tags=31%, list=1 |
| GO_PROTEI | GO_PROTEIN_O_LINI | 15  | -0.3988 | -1.0464 | 0.4235 | 0.527999 | 1 | 22092 | tags=60%, list=3 |
| GO_SULFU  | GO_SULFUR_COMPO   | 355 | -0.2351 | -1.0134 | 0.4235 | 0.549245 | 1 | 10936 | tags=23%, list=1 |
| GO_NEURA  | GO_NEURAL_NUCLE   | 59  | -0.3067 | -1.0152 | 0.4237 | 0.548831 | 1 | 14256 | tags=37%, list=2 |
| GO_AMINO  | GO_AMINOGLYCAN_   | 115 | -0.2796 | -0.9996 | 0.4241 | 0.560297 | 1 | 14148 | tags=35%, list=2 |
| GO_CORTIC | GO_CORTICAL_ACTI  | 38  | -0.3406 | -1.0464 | 0.4242 | 0.527758 | 1 | 4264  | tags=21%, list=7 |
| GO_EMBRY  | GO_EMBRYONIC_SK   | 129 | -0.2724 | -1.0185 | 0.4243 | 0.546093 | 1 | 8585  | tags=25%, list=1 |
| GO_HYDRC  | GO_HYDRO_LYASE_   | 51  | -0.3101 | -1.0351 | 0.4244 | 0.536199 | 1 | 7353  | tags=20%, list=1 |
| GO_REGUL  | GO_REGULATION_OI  | 32  | -0.3206 | -1.0123 | 0.4245 | 0.549849 | 1 | 16781 | tags=38%, list=2 |
| GO_PSEUD  | GO_PSEUDOPODIUM   | 16  | -0.3579 | -1.0403 | 0.4248 | 0.532014 | 1 | 8364  | tags=38%, list=1 |
| GO_POSITI | GO_POSITIVE_REGUI | 165 | -0.2869 | -1.031  | 0.4248 | 0.538087 | 1 | 19953 | tags=39%, list=3 |
| GO_MEIOT  | GO_MEIOTIC_CELL_  | 177 | -0.2928 | -1.0232 | 0.4253 | 0.54611  | 1 | 21000 | tags=45%, list=3 |
| GO_CYTOP  | GO_CYTOPLASMIC_I  | 34  | -0.3643 | -1.0208 | 0.4253 | 0.545253 | 1 | 9370  | tags=29%, list=1 |
| GO_REGUL  | GO_REGULATION_OI  | 59  | -0.3387 | -1.0204 | 0.4258 | 0.545097 | 1 | 14474 | tags=37%, list=2 |
| GO_ENDOT  | GO_ENDOTHELIAL_C  | 31  | -0.3221 | -1.0186 | 0.4259 | 0.546184 | 1 | 7026  | tags=29%, list=1 |
| GO_BETA_  | GO_BETA_TUBULIN_  | 37  | -0.3148 | -1.0081 | 0.4263 | 0.552956 | 1 | 18442 | tags=46%, list=3 |
| GO_COLLA  | GO_COLLAGEN_CON   | 422 | -0.3074 | -1.0482 | 0.4265 | 0.526248 | 1 | 14616 | tags=40%, list=2 |
| GO_VIRAL_ | GO_VIRAL_RNA_GEN  | 33  | -0.336  | -1.0343 | 0.4269 | 0.536429 | 1 | 5779  | tags=24%, list=1 |
| GO_ESTABI | GO_ESTABLISHMEN   | 35  | -0.392  | -1.0541 | 0.4269 | 0.521489 | 1 | 10477 | tags=34%, list=1 |
| GO_L_AMI  | GO_L_AMINO_ACID_  | 70  | -0.2916 | -1.0109 | 0.4271 | 0.550912 | 1 | 15413 | tags=36%, list=2 |
| GO_SECON  | GO_SECOND_MESSE   | 427 | -0.2542 | -1.0107 | 0.4272 | 0.550933 | 1 | 11534 | tags=32%, list=2 |
| GO_NUCLE  | GO_NUCLEAR_RECEI  | 54  | -0.3116 | -1.0219 | 0.4272 | 0.546499 | 1 | 15151 | tags=43%, list=2 |
| GO_PROTEI | GO_PROTEIN_HYDR   | 25  | -0.3587 | -1.0328 | 0.4274 | 0.536641 | 1 | 12094 | tags=32%, list=2 |
| GO_GAMM   | GO_GAMMA_TUBUL    | 28  | -0.3395 | -1.0509 | 0.4277 | 0.524135 | 1 | 5942  | tags=21%, list=1 |
| GO_ASYM   | GO_ASYMMETRIC_C   | 20  | -0.3604 | -1.0292 | 0.428  | 0.539343 | 1 | 18797 | tags=60%, list=3 |
| GO_ACROS  | GO_ACROSOMAL_VE   | 111 | -0.2445 | -1.0092 | 0.4286 | 0.552939 | 1 | 10889 | tags=24%, list=1 |
| GO_NEGAT  | GO_NEGATIVE_REGU  | 32  | -0.3303 | -1.0214 | 0.4288 | 0.546695 | 1 | 6552  | tags=25%, list=1 |
| GO_PHOSPI | GO_PHOSPHATASE_   | 15  | -0.388  | -1.0333 | 0.4294 | 0.536571 | 1 | 10299 | tags=27%, list=1 |
| GO_REGUL  | GO_REGULATION_OI  | 143 | -0.2759 | -1.0032 | 0.4298 | 0.558476 | 1 | 10853 | tags=29%, list=1 |
| GO_NEGAT  | GO_NEGATIVE_REGU  | 43  | -0.3319 | -1.035  | 0.4302 | 0.536007 | 1 | 6062  | tags=26%, list=1 |
| GO_REGUL  | GO_REGULATION_OI  | 89  | -0.3143 | -1.0264 | 0.4303 | 0.541621 | 1 | 15493 | tags=34%, list=2 |
| GO_LYPH   | GO_LYMPHANGIOGE   | 15  | -0.4154 | -1.0352 | 0.4303 | 0.536356 | 1 | 13596 | tags=53%, list=2 |
| GO_ASTRO  | GO_ASTROCYTE_PRC  | 18  | -0.3991 | -1.0392 | 0.4306 | 0.532245 | 1 | 18447 | tags=50%, list=3 |
| GO_GOLGI  | GO_GOLGI_ORGANIZ  | 148 | -0.2693 | -1.0007 | 0.431  | 0.559692 | 1 | 13249 | tags=30%, list=2 |
| GO_REGUL  | GO_REGULATION_OI  | 155 | -0.3104 | -1.0197 | 0.4316 | 0.545481 | 1 | 12743 | tags=30%, list=2 |
| GO_PROTEI | GO_PROTEIN_ACYLA  | 244 | -0.2711 | -1.0001 | 0.4316 | 0.55991  | 1 | 12883 | tags=31%, list=2 |
| GO_ANATC  | GO_ANATOMICAL_S'  | 223 | -0.2416 | -1.0029 | 0.4322 | 0.558208 | 1 | 11099 | tags=25%, list=1 |
| GO_POSITI | GO_POSITIVE_REGUI | 31  | -0.3252 | -1.0224 | 0.4324 | 0.546735 | 1 | 4975  | tags=26%, list=9 |
| GO_NEGAT  | GO_NEGATIVE_REGU  | 58  | -0.2772 | -1.0082 | 0.4327 | 0.552993 | 1 | 17923 | tags=41%, list=3 |
| GO_NEGAT  | GO_NEGATIVE_REGU  | 145 | -0.2731 | -1.0163 | 0.4329 | 0.547323 | 1 | 12974 | tags=36%, list=2 |
| GO_TRANS  | GO_TRANSEPIHELL   | 26  | -0.346  | -1.0114 | 0.4333 | 0.55079  | 1 | 17128 | tags=50%, list=2 |
| GO_PROTEI | GO_PROTEOGLYCAN   | 88  | -0.2938 | -1.0032 | 0.4333 | 0.558213 | 1 | 14654 | tags=38%, list=2 |
| GO_THYRO  | GO_THYROID_HORM   | 26  | -0.3245 | -1.0072 | 0.4337 | 0.553088 | 1 | 12434 | tags=42%, list=2 |

|           |                   |     |         |         |        |          |   |       |                   |
|-----------|-------------------|-----|---------|---------|--------|----------|---|-------|-------------------|
| GO_BASAL  | GO_BASAL_PART_OF  | 68  | -0.2913 | -1.0141 | 0.4337 | 0.549427 | 1 | 9810  | tags=26%, list=1' |
| GO_TELOM  | GO_TELOMERASE_RI  | 19  | -0.4421 | -1.0656 | 0.4339 | 0.519162 | 1 | 27032 | tags=79%, list=4  |
| GO_POSITI | GO_POSITIVE_REGUL | 17  | -0.3674 | -1.0003 | 0.4344 | 0.560113 | 1 | 7991  | tags=24%, list=1. |
| GO_REGUL  | GO_REGULATION_OI  | 166 | -0.2444 | -0.9986 | 0.4348 | 0.560488 | 1 | 8426  | tags=22%, list=1. |
| GO_FEMAL  | GO_FEMALE_MEIOTI  | 28  | -0.363  | -1.0213 | 0.4349 | 0.545876 | 1 | 20799 | tags=50%, list=3  |
| GO_NEGAT  | GO_NEGATIVE_REGU  | 384 | -0.2343 | -0.9937 | 0.4354 | 0.565607 | 1 | 15704 | tags=33%, list=2  |
| GO_CHONC  | GO_CHONDROITIN_S  | 31  | -0.3595 | -1.0228 | 0.436  | 0.546354 | 1 | 19019 | tags=52%, list=3  |
| GO_LOW_D  | GO_LOW_DENSITY_I  | 16  | -0.3761 | -1.0173 | 0.4361 | 0.546728 | 1 | 6746  | tags=31%, list=1. |
| GO_COPUL  | GO_COPULATION     | 20  | -0.3411 | -1.013  | 0.4366 | 0.54954  | 1 | 6239  | tags=25%, list=1  |
| GO_RAB_G  | GO_RAB_GTPASE_BI  | 168 | -0.2529 | -0.9805 | 0.4371 | 0.578323 | 1 | 7878  | tags=23%, list=1. |
| GO_NUCLE  | GO_NUCLEAR_PERIP  | 130 | -0.2987 | -1.018  | 0.4377 | 0.546347 | 1 | 12268 | tags=36%, list=2  |
| GO_GLIAL  | GO_GLIAL_CELL_PR  | 50  | -0.283  | -1.0074 | 0.4381 | 0.553251 | 1 | 12629 | tags=36%, list=2  |
| GO_RENAL  | GO_RENAL_VESICLE  | 20  | -0.3613 | -0.9919 | 0.4381 | 0.566875 | 1 | 5634  | tags=30%, list=1' |
| GO_PHOSPI | GO_PHOSPHATIDYLI  | 152 | -0.2615 | -0.9992 | 0.4391 | 0.560372 | 1 | 7771  | tags=24%, list=1. |
| GO_TELOM  | GO_TELOMERE_CAP   | 38  | -0.3469 | -1.0346 | 0.4392 | 0.536355 | 1 | 6594  | tags=29%, list=1  |
| GO_FOREB  | GO_FOREBRAIN_REC  | 23  | -0.3469 | -1.0169 | 0.4392 | 0.547212 | 1 | 10299 | tags=35%, list=1. |
| GO_REGUL  | GO_REGULATION_OI  | 18  | -0.4262 | -1.0423 | 0.4393 | 0.529478 | 1 | 6091  | tags=33%, list=1' |
| GO_EXTRIN | GO_EXTRINSIC_COM  | 168 | -0.259  | -1.0141 | 0.4393 | 0.549268 | 1 | 9326  | tags=26%, list=1. |
| GO_REGUL  | GO_REGULATION_OI  | 106 | -0.2923 | -1.0111 | 0.4401 | 0.55077  | 1 | 9810  | tags=27%, list=1' |
| GO_OXIDO  | GO_OXIDOREDUCTA   | 45  | -0.2984 | -1.0136 | 0.4401 | 0.549591 | 1 | 3386  | tags=13%, list=6  |
| GO_NEGAT  | GO_NEGATIVE_REGU  | 27  | -0.343  | -0.9986 | 0.4406 | 0.560223 | 1 | 9880  | tags=37%, list=1' |
| GO_RESPOI | GO_RESPONSE_TO_P  | 439 | -0.2258 | -0.9802 | 0.4407 | 0.578222 | 1 | 9208  | tags=23%, list=1. |
| GO_MALE_  | GO_MALE_SEX_DIFF  | 161 | -0.2456 | -1.007  | 0.4412 | 0.553224 | 1 | 11808 | tags=29%, list=2  |
| GO_GENET  | GO_GENETIC_IMPRIN | 26  | -0.3511 | -1.0215 | 0.4419 | 0.54681  | 1 | 16435 | tags=46%, list=2  |
| GO_NUCLE  | GO_NUCLEAR_MATR   | 108 | -0.3016 | -1.0187 | 0.4427 | 0.546365 | 1 | 12268 | tags=36%, list=2  |
| GO_POSITI | GO_POSITIVE_REGUL | 33  | -0.3697 | -1.0279 | 0.4429 | 0.540811 | 1 | 16562 | tags=45%, list=2  |
| GO_PRC1_  | GO_PRC1_COMPLEX   | 15  | -0.3915 | -1.038  | 0.4436 | 0.532656 | 1 | 5223  | tags=33%, list=9  |
| GO_CATEC  | GO_CATECHOLAMIN   | 52  | -0.2733 | -0.9881 | 0.4442 | 0.571663 | 1 | 8976  | tags=23%, list=1. |
| GO_CLATH  | GO_CLATHRIN_COA   | 16  | -0.3456 | -1.0146 | 0.4449 | 0.549119 | 1 | 11018 | tags=44%, list=1' |
| GO_CELLU  | GO_CELLULAR_AMIN  | 121 | -0.2628 | -1.0083 | 0.4449 | 0.553194 | 1 | 7085  | tags=18%, list=1. |
| GO_RNA_D  | GO_RNA_DESTABILL  | 34  | -0.3508 | -1.021  | 0.4451 | 0.545205 | 1 | 5380  | tags=32%, list=9  |
| GO_EPITHE | GO_EPITHELIAL_STR | 26  | -0.319  | -0.998  | 0.4456 | 0.560739 | 1 | 17625 | tags=35%, list=3  |
| GO_VESICI | GO_VESICLE_CYTOS  | 72  | -0.3063 | -1.0207 | 0.4458 | 0.545107 | 1 | 6170  | tags=22%, list=1  |
| GO_AMINO  | GO_AMINOGLYCAN_   | 170 | -0.2547 | -0.9744 | 0.4458 | 0.580037 | 1 | 14148 | tags=35%, list=2  |
| GO_ENDOP  | GO_ENDOPLASMIC_I  | 299 | -0.2673 | -0.9799 | 0.446  | 0.57789  | 1 | 13850 | tags=36%, list=2  |
| GO_POSITI | GO_POSITIVE_REGUL | 23  | -0.3405 | -0.9921 | 0.4462 | 0.566937 | 1 | 8836  | tags=26%, list=1. |
| GO_REGUL  | GO_REGULATION_OI  | 117 | -0.264  | -1.0088 | 0.4463 | 0.553122 | 1 | 9901  | tags=28%, list=1' |
| GO_N_ACE  | GO_N_ACETYLTRAN   | 82  | -0.3091 | -1.0213 | 0.4464 | 0.546126 | 1 | 9645  | tags=28%, list=1' |
| GO_METAL  | GO_METALLOCARBC   | 29  | -0.3173 | -0.9798 | 0.4472 | 0.577902 | 1 | 25053 | tags=66%, list=4  |
| GO_INSULI | GO_INSULIN_LIKE_G | 23  | -0.3561 | -1.0126 | 0.4478 | 0.549617 | 1 | 22384 | tags=61%, list=3  |
| GO_BRANC  | GO_BRANCHING_INV  | 23  | -0.3405 | -0.9992 | 0.4479 | 0.560595 | 1 | 9996  | tags=35%, list=1' |
| GO_RESPOI | GO_RESPONSE_TO_H  | 19  | -0.3592 | -0.9946 | 0.4483 | 0.564362 | 1 | 18609 | tags=53%, list=3  |
| GO_MYOBI  | GO_MYOBLAST_PRO   | 27  | -0.322  | -0.9978 | 0.4499 | 0.560812 | 1 | 12950 | tags=41%, list=2  |
| GO_REGUL  | GO_REGULATION_OI  | 39  | -0.321  | -0.999  | 0.4509 | 0.560185 | 1 | 8426  | tags=31%, list=1. |
| GO_POLYS. | GO_POLYSACCHARII  | 108 | -0.2579 | -0.9922 | 0.4509 | 0.56753  | 1 | 14094 | tags=35%, list=2  |
| GO_INTRIN | GO_INTRINSIC_COMI | 47  | -0.3314 | -1.0075 | 0.4512 | 0.553432 | 1 | 14389 | tags=43%, list=2  |
| GO_FAT_C  | GO_FAT_CELL_DIFFE | 229 | -0.2348 | -0.9852 | 0.4513 | 0.574185 | 1 | 11011 | tags=27%, list=1' |
| GO_ACYL_  | GO_ACYL_COA_BINI  | 22  | -0.3454 | -0.9858 | 0.4517 | 0.573746 | 1 | 1159  | tags=14%, list=2  |
| GO_POSITI | GO_POSITIVE_REGUL | 297 | -0.2701 | -1.0086 | 0.4526 | 0.553094 | 1 | 18914 | tags=41%, list=3  |
| GO_POSITI | GO_POSITIVE_REGUL | 15  | -0.3704 | -0.9968 | 0.4527 | 0.562349 | 1 | 7026  | tags=40%, list=1. |
| GO_POLYS. | GO_POLYSACCHARII  | 25  | -0.3171 | -0.9911 | 0.4533 | 0.567768 | 1 | 14094 | tags=44%, list=2  |
| GO_REGUL  | GO_REGULATION_OI  | 98  | -0.3193 | -1.0232 | 0.4535 | 0.545887 | 1 | 7154  | tags=28%, list=1. |
| GO_NEUTR  | GO_NEUTROPHIL_HC  | 16  | -0.3863 | -1.0139 | 0.4537 | 0.549366 | 1 | 359   | tags=13%, list=1  |
| GO_CILIAR | GO_CILIARY_BASAL  | 94  | -0.3385 | -1.0212 | 0.4538 | 0.545612 | 1 | 8595  | tags=26%, list=1. |
| GO_NEGAT  | GO_NEGATIVE_REGU  | 20  | -0.3388 | -1.007  | 0.454  | 0.552967 | 1 | 9127  | tags=40%, list=1. |
| GO_CALCII | GO_CALCIIUM_ACTIV | 25  | -0.3375 | -1.0031 | 0.454  | 0.558008 | 1 | 11874 | tags=32%, list=2  |
| GO_CIRCAI | GO_CIRCADIAN_REC  | 64  | -0.2885 | -0.9921 | 0.454  | 0.567094 | 1 | 11334 | tags=38%, list=1' |
| GO_HISTON | GO_HISTONE_BINDIN | 230 | -0.3131 | -1.0191 | 0.4549 | 0.54595  | 1 | 6879  | tags=25%, list=1. |

|           |                   |     |         |         |        |          |   |       |                   |
|-----------|-------------------|-----|---------|---------|--------|----------|---|-------|-------------------|
| GO_HEPAT  | GO_HEPATICOBILIAI | 144 | -0.251  | -0.9996 | 0.4552 | 0.560552 | 1 | 11335 | tags=28%, list=1' |
| GO_PROTEI | GO_PROTEIN_SERINI | 75  | -0.2739 | -1.0074 | 0.4554 | 0.55298  | 1 | 11153 | tags=32%, list=1' |
| GO_REGUL  | GO_REGULATION_OI  | 27  | -0.3783 | -1.0161 | 0.4554 | 0.547448 | 1 | 7690  | tags=33%, list=1. |
| GO_COPII  | GO_COPII_VESICLE  | 15  | -0.3908 | -0.9954 | 0.4554 | 0.563267 | 1 | 11751 | tags=33%, list=2  |
| GO_TERMII | GO_TERMINAL_BOU   | 56  | -0.3232 | -1.0057 | 0.4555 | 0.554565 | 1 | 16853 | tags=46%, list=2  |
| GO_AMINO  | GO_AMINO_ACID_IM  | 44  | -0.3109 | -0.9926 | 0.456  | 0.566997 | 1 | 8909  | tags=27%, list=1. |
| GO_POSITI | GO_POSITIVE_REGUI | 51  | -0.3078 | -0.9985 | 0.457  | 0.560169 | 1 | 8726  | tags=27%, list=1. |
| GO_OSTEO  | GO_OSTEOBLAST_DF  | 19  | -0.3394 | -1.0143 | 0.4571 | 0.549449 | 1 | 16015 | tags=53%, list=2  |
| GO_SPROU  | GO_SPROUTING_ANC  | 186 | -0.2461 | -0.9699 | 0.4572 | 0.583735 | 1 | 9208  | tags=20%, list=1. |
| GO_ALPHA  | GO_ALPHA_AMINO_   | 190 | -0.2473 | -0.996  | 0.4575 | 0.562783 | 1 | 10956 | tags=24%, list=1' |
| GO_POSITI | GO_POSITIVE_REGUI | 23  | -0.3511 | -1.0013 | 0.4586 | 0.559487 | 1 | 9901  | tags=39%, list=1' |
| GO_GUANY  | GO_GUANYL_NUCLE   | 210 | -0.2508 | -0.9815 | 0.4587 | 0.577155 | 1 | 7772  | tags=20%, list=1. |
| GO_INTERC | GO_INTERCELLULAR  | 70  | -0.278  | -0.9803 | 0.4588 | 0.578359 | 1 | 11877 | tags=29%, list=2  |
| GO_SEMAP  | GO_SEMAPHORIN_PI  | 40  | -0.2952 | -1.0028 | 0.4588 | 0.558039 | 1 | 7998  | tags=30%, list=1. |
| GO_REGEN  | GO_REGENERATION   | 196 | -0.2437 | -0.9885 | 0.4589 | 0.571241 | 1 | 8707  | tags=23%, list=1. |
| GO_GAS_TI | GO_GAS_TRANSPOR   | 20  | -0.3644 | -1.0003 | 0.4592 | 0.559857 | 1 | 4675  | tags=20%, list=8  |
| GO_LOCAL  | GO_LOCALIZATION_  | 95  | -0.2765 | -0.9866 | 0.4597 | 0.573175 | 1 | 8836  | tags=29%, list=1. |
| GO_FERRO  | GO_FERROUS_IRON_  | 26  | -0.3147 | -0.9964 | 0.4602 | 0.562729 | 1 | 13270 | tags=35%, list=2  |
| GO_REGUL  | GO_REGULATION_OI  | 63  | -0.3285 | -1.0008 | 0.4605 | 0.559896 | 1 | 15678 | tags=46%, list=2  |
| GO_HYPER  | GO_HYPEROSMOTIC   | 28  | -0.3042 | -0.9992 | 0.4611 | 0.560141 | 1 | 10608 | tags=32%, list=1  |
| GO_CALCII | GO_CALCIIUM_ION_R | 23  | -0.3931 | -1.0091 | 0.4612 | 0.552809 | 1 | 19869 | tags=52%, list=3  |
| GO_BLASTI | GO_BLASTOCYST_GI  | 20  | -0.3752 | -1.0016 | 0.4612 | 0.559311 | 1 | 12950 | tags=35%, list=2  |
| GO_NEGAT  | GO_NEGATIVE_REGU  | 49  | -0.2873 | -1.0132 | 0.4617 | 0.549439 | 1 | 13913 | tags=31%, list=2  |
| GO_PHOSPI | GO_PHOSPHOLIPID_I | 263 | -0.2338 | -0.9763 | 0.4618 | 0.579516 | 1 | 9956  | tags=24%, list=1' |
| GO_ENTER  | GO_ENTERIC_NERV   | 15  | -0.4077 | -1.0037 | 0.4627 | 0.557918 | 1 | 13955 | tags=47%, list=2  |
| GO_CELLU  | GO_CELLULAR_HYPI  | 15  | -0.3567 | -0.9841 | 0.4644 | 0.57467  | 1 | 13811 | tags=40%, list=2  |
| GO_BLOOD  | GO_BLOOD_VESSEL_  | 183 | -0.2417 | -0.9807 | 0.4647 | 0.578203 | 1 | 11823 | tags=26%, list=2  |
| GO_DNA_M  | GO_DNA_METHYLAT   | 94  | -0.2895 | -0.9908 | 0.4656 | 0.568078 | 1 | 16537 | tags=35%, list=2  |
| GO_PHOSPI | GO_PHOSPHATIDYLI  | 16  | -0.3741 | -1.0086 | 0.466  | 0.552981 | 1 | 8398  | tags=38%, list=1. |
| GO_PHOSPI | GO_PHOSPHATIDYLI  | 27  | -0.3189 | -0.9873 | 0.4668 | 0.572536 | 1 | 2684  | tags=19%, list=5  |
| GO_CELLU  | GO_CELLULAR_RESE  | 22  | -0.3296 | -0.9801 | 0.467  | 0.578071 | 1 | 5278  | tags=18%, list=9  |
| GO_RESPO  | GO_RESPONSE_TO_K  | 199 | -0.235  | -0.9852 | 0.4671 | 0.574424 | 1 | 5228  | tags=16%, list=9  |
| GO_RAC_PI | GO_RAC_PROTEIN_S  | 37  | -0.3051 | -0.9958 | 0.4678 | 0.562919 | 1 | 8997  | tags=35%, list=1. |
| GO_MITOTI | GO_MITOTIC_SPINDI | 127 | -0.2996 | -0.9737 | 0.468  | 0.580185 | 1 | 11553 | tags=27%, list=2  |
| GO_SOLUT  | GO_SOLUTE_ANION_  | 28  | -0.3251 | -0.9962 | 0.4692 | 0.562806 | 1 | 16343 | tags=39%, list=2  |
| GO_PROXII | GO_PROXIMAL_DIST  | 33  | -0.3335 | -0.9792 | 0.4697 | 0.578378 | 1 | 8254  | tags=30%, list=1. |
| GO_REGUL  | GO_REGULATION_OI  | 23  | -0.3706 | -1.0012 | 0.4701 | 0.559424 | 1 | 1712  | tags=17%, list=3  |
| GO_CHAPE  | GO_CHAPERONE_CO   | 25  | -0.3486 | -0.9725 | 0.4701 | 0.580799 | 1 | 18833 | tags=48%, list=3  |
| GO_NEGAT  | GO_NEGATIVE_REGU  | 34  | -0.295  | -0.9835 | 0.4702 | 0.575288 | 1 | 13129 | tags=24%, list=2  |
| GO_CELLU  | GO_CELLULAR_MON   | 113 | -0.2581 | -0.9776 | 0.4704 | 0.578569 | 1 | 10114 | tags=27%, list=1' |
| GO_NEGAT  | GO_NEGATIVE_REGU  | 39  | -0.2993 | -0.9719 | 0.4706 | 0.581455 | 1 | 16193 | tags=38%, list=2  |
| GO_AMYL   | GO_AMYLOID_PRECI  | 18  | -0.3321 | -0.9933 | 0.4707 | 0.566186 | 1 | 5855  | tags=22%, list=1' |
| GO_METHY  | GO_METHYLATION    | 333 | -0.2727 | -0.9899 | 0.4709 | 0.569436 | 1 | 16653 | tags=37%, list=2  |
| GO_PRIMA  | GO_PRIMARY_ALCOI  | 94  | -0.2588 | -0.9824 | 0.4712 | 0.57637  | 1 | 15827 | tags=33%, list=2  |
| GO_EXTRA  | GO_EXTRACELLULA   | 387 | -0.2924 | -0.9777 | 0.4715 | 0.578894 | 1 | 10359 | tags=31%, list=1  |
| GO_SPHINC | GO_SPHINGOID_MET  | 18  | -0.3509 | -0.9874 | 0.4717 | 0.572626 | 1 | 5845  | tags=22%, list=1' |
| GO_REGUL  | GO_REGULATION_OI  | 42  | -0.3205 | -0.9781 | 0.4717 | 0.578835 | 1 | 14502 | tags=45%, list=2  |
| GO_REGUL  | GO_REGULATION_OI  | 56  | -0.2888 | -0.9843 | 0.4734 | 0.574968 | 1 | 6438  | tags=23%, list=1  |
| GO_ENDOP  | GO_ENDOPLASMIC_I  | 120 | -0.2601 | -0.9831 | 0.4734 | 0.575576 | 1 | 7176  | tags=20%, list=1. |
| GO_PRERIE | GO_PRERIBOSOME    | 72  | -0.3383 | -0.9727 | 0.4739 | 0.580695 | 1 | 3469  | tags=18%, list=6  |
| GO_RNA_P  | GO_RNA_POLYADEN   | 42  | -0.3453 | -0.9897 | 0.4744 | 0.569443 | 1 | 7870  | tags=29%, list=1. |
| GO_POSITI | GO_POSITIVE_REGUI | 65  | -0.2862 | -0.9873 | 0.4749 | 0.572333 | 1 | 9647  | tags=20%, list=1' |
| GO_HOMOI  | GO_HOMOLOGOUS_C   | 42  | -0.3034 | -0.9686 | 0.475  | 0.584156 | 1 | 17563 | tags=38%, list=3  |
| GO_SEROT  | GO_SEROTONIN_TRA  | 21  | -0.342  | -0.9692 | 0.4752 | 0.584088 | 1 | 9389  | tags=33%, list=1. |
| GO_POSITI | GO_POSITIVE_REGUI | 36  | -0.3125 | -0.983  | 0.4754 | 0.575474 | 1 | 6753  | tags=19%, list=1. |
| GO_MITOTI | GO_MITOTIC_CYTOK  | 71  | -0.3108 | -0.984  | 0.4759 | 0.574587 | 1 | 8593  | tags=24%, list=1. |
| GO_RESPO  | GO_RESPONSE_TO_E  | 45  | -0.298  | -0.9753 | 0.476  | 0.579757 | 1 | 8211  | tags=27%, list=1. |
| GO_NEGAT  | GO_NEGATIVE_REGU  | 25  | -0.367  | -1.0113 | 0.4762 | 0.550675 | 1 | 3475  | tags=20%, list=6  |

|           |                   |     |         |         |        |          |   |       |                  |
|-----------|-------------------|-----|---------|---------|--------|----------|---|-------|------------------|
| GO_DETER  | GO_DETERMINATION  | 16  | -0.3646 | -0.9912 | 0.4765 | 0.567865 | 1 | 18070 | tags=56%, list=3 |
| GO_NEGAT  | GO_NEGATIVE_REGU  | 248 | -0.2486 | -0.9791 | 0.4771 | 0.578265 | 1 | 6622  | tags=20%, list=1 |
| GO_G_PRO  | GO_G_PROTEIN_COU  | 241 | -0.2542 | -0.9766 | 0.4776 | 0.579189 | 1 | 20489 | tags=49%, list=3 |
| GO_REGUL  | GO_REGULATION_OI  | 24  | -0.3614 | -0.9922 | 0.4782 | 0.567305 | 1 | 10105 | tags=33%, list=1 |
| GO_REGUL  | GO_REGULATION_OI  | 16  | -0.4408 | -1.0402 | 0.4782 | 0.531991 | 1 | 5865  | tags=31%, list=1 |
| GO_PROTEI | GO_PROTEIN_HETER  | 22  | -0.3337 | -0.974  | 0.4782 | 0.580157 | 1 | 8456  | tags=32%, list=1 |
| GO_MRNA_  | GO_MRNA_5_UTR_BI  | 26  | -0.3491 | -0.9792 | 0.4784 | 0.578617 | 1 | 6459  | tags=23%, list=1 |
| GO_G_PRO  | GO_G_PROTEIN_COU  | 15  | -0.3891 | -1.0025 | 0.4787 | 0.558234 | 1 | 16646 | tags=53%, list=2 |
| GO_PHOSPI | GO_PHOSPHATIDYLC  | 18  | -0.3394 | -0.9714 | 0.481  | 0.582033 | 1 | 8929  | tags=33%, list=1 |
| GO_MECHA  | GO_MECHANOSENS    | 15  | -0.3733 | -0.979  | 0.4813 | 0.57806  | 1 | 20089 | tags=67%, list=3 |
| GO_TRANS  | GO_TRANSCRIPTION  | 481 | -0.2512 | -0.9768 | 0.4816 | 0.579113 | 1 | 8870  | tags=23%, list=1 |
| GO_GLUCC  | GO_GLUCOSAMINE_1  | 24  | -0.322  | -0.9753 | 0.4818 | 0.579253 | 1 | 8437  | tags=29%, list=1 |
| GO_REGUL  | GO_REGULATION_OI  | 128 | -0.2377 | -0.9801 | 0.4826 | 0.577916 | 1 | 7458  | tags=18%, list=1 |
| GO_PHOSPI | GO_PHOSPHATIDYLI  | 179 | -0.2399 | -0.9681 | 0.4826 | 0.584137 | 1 | 9535  | tags=24%, list=1 |
| GO_COVAL  | GO_COVALENT_CHR   | 460 | -0.2735 | -0.9822 | 0.4828 | 0.576341 | 1 | 12756 | tags=31%, list=2 |
| GO_POSITI | GO_POSITIVE_REGUI | 20  | -0.3409 | -0.9774 | 0.4831 | 0.578622 | 1 | 17171 | tags=40%, list=2 |
| GO_REGUL  | GO_REGULATION_OI  | 40  | -0.2889 | -0.9863 | 0.4832 | 0.57349  | 1 | 7461  | tags=23%, list=1 |
| GO_ADAPT  | GO_ADAPTATION_OI  | 21  | -0.3192 | -0.9746 | 0.4833 | 0.579973 | 1 | 6745  | tags=29%, list=1 |
| GO_M_BAND | GO_M_BAND         | 25  | -0.3171 | -0.9698 | 0.4837 | 0.583674 | 1 | 6954  | tags=24%, list=1 |
| GO_MANN   | GO_MANNOSIDASE_   | 15  | -0.3702 | -0.9669 | 0.4839 | 0.584675 | 1 | 6183  | tags=33%, list=1 |
| GO_PROTEI | GO_PROTEIN_DEPHC  | 316 | -0.2311 | -0.9678 | 0.4859 | 0.583867 | 1 | 10136 | tags=25%, list=1 |
| GO_REGUL  | GO_REGULATION_OI  | 211 | -0.2459 | -0.9575 | 0.4862 | 0.593026 | 1 | 11638 | tags=29%, list=2 |
| GO_ACETY  | GO_ACETYL_COA_BI  | 16  | -0.3671 | -0.9753 | 0.4866 | 0.579487 | 1 | 15930 | tags=38%, list=2 |
| GO_STARTI | GO_STARTLE_RESPO  | 27  | -0.3446 | -0.9756 | 0.4868 | 0.579516 | 1 | 18325 | tags=48%, list=3 |
| GO_RNA_B  | GO_RNA_BINDING_I  | 259 | -0.2715 | -1.0016 | 0.4871 | 0.559586 | 1 | 23672 | tags=33%, list=4 |
| GO_UDP_N  | GO_UDP_N_ACETYLC  | 16  | -0.3716 | -0.974  | 0.4873 | 0.58036  | 1 | 10761 | tags=44%, list=1 |
| GO_S_ADEI | GO_S_ADENOSYLME   | 138 | -0.2792 | -0.9609 | 0.4875 | 0.589368 | 1 | 14041 | tags=33%, list=2 |
| GO_NEURC  | GO_NEUROTRANSMI   | 46  | -0.3362 | -0.9858 | 0.4876 | 0.573929 | 1 | 6136  | tags=28%, list=1 |
| GO_PROTEI | GO_PROTEIN_SERINI | 422 | -0.241  | -0.9662 | 0.4876 | 0.585282 | 1 | 8398  | tags=23%, list=1 |
| GO_MUCOF  | GO_MUCOPOLYSACC   | 111 | -0.2786 | -0.9752 | 0.4881 | 0.579209 | 1 | 13893 | tags=35%, list=2 |
| GO_METHY  | GO_METHYL_CPG_B   | 24  | -0.3462 | -0.9817 | 0.4884 | 0.576921 | 1 | 2333  | tags=13%, list=4 |
| GO_MITOC  | GO_MITOCHONDRIA   | 81  | -0.2581 | -0.9547 | 0.4885 | 0.595894 | 1 | 10643 | tags=26%, list=1 |
| GO_TRANS  | GO_TRANSITION_ME  | 37  | -0.3042 | -0.9628 | 0.4886 | 0.588309 | 1 | 16073 | tags=46%, list=2 |
| GO_REGUL  | GO_REGULATION_OI  | 30  | -0.3129 | -0.9614 | 0.4892 | 0.589118 | 1 | 8024  | tags=27%, list=1 |
| GO_HETER  | GO_HETEROTRIMERI  | 33  | -0.3295 | -0.9845 | 0.4897 | 0.575133 | 1 | 13655 | tags=45%, list=2 |
| GO_PHASIC | GO_PHASIC_SMOOTH  | 21  | -0.338  | -0.9692 | 0.4906 | 0.583958 | 1 | 15363 | tags=43%, list=2 |
| GO_RHO_G  | GO_RHO_GUANYL_N   | 60  | -0.2955 | -0.9732 | 0.4908 | 0.580451 | 1 | 10477 | tags=35%, list=1 |
| GO_POSITI | GO_POSITIVE_REGUI | 231 | -0.2497 | -0.9381 | 0.4909 | 0.610773 | 1 | 10943 | tags=28%, list=1 |
| GO_NEURC  | GO_NEUROEPITHELI  | 54  | -0.2981 | -0.969  | 0.4912 | 0.583978 | 1 | 16442 | tags=41%, list=2 |
| GO_CELLU  | GO_CELLULAR_RESF  | 220 | -0.2317 | -0.9597 | 0.4917 | 0.590966 | 1 | 10177 | tags=24%, list=1 |
| GO_POSITI | GO_POSITIVE_REGUI | 27  | -0.3207 | -0.9602 | 0.4919 | 0.590386 | 1 | 21115 | tags=44%, list=3 |
| GO_MEIOSI | GO_MEIOSIS_I_CELL | 112 | -0.282  | -0.9559 | 0.4935 | 0.59476  | 1 | 6091  | tags=18%, list=1 |
| GO_MEMBI  | GO_MEMBRANE_CO    | 91  | -0.2698 | -0.9615 | 0.494  | 0.5892   | 1 | 12519 | tags=32%, list=2 |
| GO_PROTEI | GO_PROTEIN_KINAS  | 52  | -0.2645 | -0.9842 | 0.4945 | 0.574893 | 1 | 5779  | tags=21%, list=1 |
| GO_INTRIN | GO_INTRINSIC_COMI | 18  | -0.3602 | -0.9695 | 0.4949 | 0.584002 | 1 | 21094 | tags=61%, list=3 |
| GO_G_PRO  | GO_G_PROTEIN_BET  | 19  | -0.3652 | -0.9776 | 0.495  | 0.578845 | 1 | 13655 | tags=53%, list=2 |
| GO_GOLGI  | GO_GOLGI_VESICLE  | 365 | -0.249  | -0.9761 | 0.495  | 0.579154 | 1 | 13249 | tags=30%, list=2 |
| GO_ANGIO  | GO_ANGIOGENESIS_  | 30  | -0.3256 | -0.9545 | 0.495  | 0.595944 | 1 | 4750  | tags=23%, list=8 |
| GO_MICRO  | GO_MICROTUBULE_I  | 29  | -0.3291 | -0.9571 | 0.4951 | 0.593331 | 1 | 7579  | tags=24%, list=1 |
| GO_REGUL  | GO_REGULATION_OI  | 61  | -0.2819 | -0.9778 | 0.4952 | 0.579066 | 1 | 12883 | tags=31%, list=2 |
| GO_CAJAL  | GO_CAJAL_BODY     | 75  | -0.3136 | -0.9787 | 0.4952 | 0.578094 | 1 | 19578 | tags=60%, list=3 |
| GO_REGUL  | GO_REGULATION_OI  | 58  | -0.2791 | -0.9673 | 0.496  | 0.584546 | 1 | 6746  | tags=21%, list=1 |
| GO_REGUL  | GO_REGULATION_OI  | 66  | -0.3313 | -0.9623 | 0.4961 | 0.588592 | 1 | 17523 | tags=41%, list=3 |
| GO_REGUL  | GO_REGULATION_OI  | 80  | -0.263  | -0.9626 | 0.4969 | 0.588337 | 1 | 16570 | tags=36%, list=2 |
| GO_L_AMI  | GO_L_AMINO_ACID_  | 57  | -0.2865 | -0.9699 | 0.497  | 0.58395  | 1 | 13965 | tags=32%, list=2 |
| GO_ARACH  | GO_ARACHIDONIC_A  | 31  | -0.294  | -0.973  | 0.498  | 0.580568 | 1 | 16012 | tags=39%, list=2 |
| GO_LENS_F | GO_LENS_FIBER_CEI | 35  | -0.2952 | -0.9787 | 0.498  | 0.578299 | 1 | 15683 | tags=43%, list=2 |
| GO_ACTIV  | GO_ACTIVATION_OF  | 38  | -0.299  | -0.967  | 0.499  | 0.584785 | 1 | 15488 | tags=42%, list=2 |

|           |                   |     |         |         |        |          |   |       |                  |
|-----------|-------------------|-----|---------|---------|--------|----------|---|-------|------------------|
| GO_REGUL  | GO_REGULATION_OF  | 120 | -0.267  | -0.9615 | 0.501  | 0.589441 | 1 | 14094 | tags=34%, list=2 |
| GO_CLATH  | GO_CLATHRIN_COAT  | 45  | -0.2838 | -0.9657 | 0.501  | 0.585827 | 1 | 12519 | tags=33%, list=2 |
| GO_SYNAP  | GO_SYNAPTIC_VESIC | 20  | -0.384  | -0.9762 | 0.501  | 0.579307 | 1 | 16005 | tags=50%, list=2 |
| GO_MAMM   | GO_MAMMARY_GLAND  | 32  | -0.2858 | -0.9573 | 0.501  | 0.593102 | 1 | 8067  | tags=31%, list=1 |
| GO_NUCLE  | GO_NUCLEOSOME_C   | 108 | -0.318  | -0.9758 | 0.5019 | 0.579555 | 1 | 7540  | tags=24%, list=1 |
| GO_OUTER  | GO_OUTER_DYNEIN   | 17  | -0.3515 | -0.952  | 0.5019 | 0.598357 | 1 | 22421 | tags=59%, list=3 |
| GO_POSIT  | GO_POSITIVE_REGUL | 201 | -0.2483 | -0.9773 | 0.502  | 0.578554 | 1 | 15413 | tags=39%, list=2 |
| GO_NEGAT  | GO_NEGATIVE_REGU  | 15  | -0.3609 | -0.9618 | 0.5029 | 0.58926  | 1 | 2895  | tags=20%, list=5 |
| GO_PROTE  | GO_PROTEIN_TARGET | 40  | -0.295  | -0.9291 | 0.5029 | 0.620245 | 1 | 15946 | tags=38%, list=2 |
| GO_WW_D   | GO_WW_DOMAIN_BI   | 30  | -0.306  | -0.9634 | 0.503  | 0.587801 | 1 | 13846 | tags=40%, list=2 |
| GO_OXYGE  | GO_OXYGEN_TRANS   | 15  | -0.3731 | -0.9486 | 0.503  | 0.6017   | 1 | 4675  | tags=20%, list=8 |
| GO_MITOT  | GO_MITOTIC_DNA_I  | 104 | -0.2842 | -0.9414 | 0.503  | 0.609471 | 1 | 8824  | tags=27%, list=1 |
| GO_REGUL  | GO_REGULATION_OF  | 18  | -0.333  | -0.964  | 0.5039 | 0.587779 | 1 | 5959  | tags=22%, list=1 |
| GO_PHENO  | GO_PHENOL_CONTA   | 107 | -0.2394 | -0.9653 | 0.504  | 0.586045 | 1 | 12434 | tags=29%, list=2 |
| GO_RNA_P  | GO_RNA_PHOSPHOD   | 80  | -0.2714 | -0.9583 | 0.5047 | 0.592533 | 1 | 5896  | tags=16%, list=1 |
| GO_REGUL  | GO_REGULATION_OF  | 17  | -0.389  | -0.9684 | 0.5048 | 0.584166 | 1 | 3895  | tags=24%, list=7 |
| GO_FIBRO  | GO_FIBROBLAST_MI  | 44  | -0.2897 | -0.951  | 0.5048 | 0.598222 | 1 | 14514 | tags=41%, list=2 |
| GO_POSIT  | GO_POSITIVE_REGUL | 24  | -0.3243 | -0.9541 | 0.5048 | 0.596244 | 1 | 4975  | tags=29%, list=9 |
| GO_PHOSPI | GO_PHOSPHOLIPASE  | 100 | -0.2478 | -0.964  | 0.5049 | 0.58761  | 1 | 9182  | tags=26%, list=1 |
| GO_POSIT  | GO_POSITIVE_REGUL | 15  | -0.4302 | -0.9843 | 0.5058 | 0.57514  | 1 | 26594 | tags=73%, list=4 |
| GO_POSIT  | GO_POSITIVE_REGUL | 22  | -0.325  | -0.9645 | 0.5059 | 0.587088 | 1 | 10511 | tags=36%, list=1 |
| GO_SUMO_  | GO_SUMO_TRANSFE   | 19  | -0.3346 | -0.9553 | 0.5067 | 0.595401 | 1 | 7426  | tags=21%, list=1 |
| GO_RAB_G  | GO_RAB_GUANYL_N   | 32  | -0.3104 | -0.9269 | 0.5068 | 0.621654 | 1 | 7749  | tags=22%, list=1 |
| GO_SEGME  | GO_SEGMENT_SPECI  | 16  | -0.3411 | -0.9549 | 0.5068 | 0.595678 | 1 | 5536  | tags=25%, list=9 |
| GO_TELOM  | GO_TELOMERIC_DN   | 35  | -0.3465 | -0.9664 | 0.5075 | 0.58528  | 1 | 9146  | tags=29%, list=1 |
| GO_INTRA  | GO_INTRACILIARY_I | 40  | -0.3452 | -0.9678 | 0.508  | 0.584136 | 1 | 18904 | tags=52%, list=3 |
| GO_ACETY  | GO_ACETYLCHOLINI  | 22  | -0.3321 | -0.9412 | 0.5082 | 0.609022 | 1 | 22111 | tags=64%, list=3 |
| GO_REGUL  | GO_REGULATION_OF  | 113 | -0.3023 | -0.9378 | 0.5095 | 0.610821 | 1 | 12743 | tags=29%, list=2 |
| GO_ESTAB  | GO_ESTABLISHMEN   | 36  | -0.3389 | -0.9578 | 0.5097 | 0.592863 | 1 | 10477 | tags=31%, list=1 |
| GO_REGUL  | GO_REGULATION_OF  | 27  | -0.3065 | -0.9395 | 0.5104 | 0.60924  | 1 | 6054  | tags=26%, list=1 |
| GO_STRIAT | GO_STRIATUM_DEVI  | 18  | -0.3531 | -0.9735 | 0.5118 | 0.580202 | 1 | 22617 | tags=50%, list=3 |
| GO_NEGAT  | GO_NEGATIVE_REGU  | 44  | -0.3654 | -0.9634 | 0.512  | 0.588062 | 1 | 11360 | tags=36%, list=1 |
| GO_DENSE  | GO_DENSE_CORE_GI  | 27  | -0.3602 | -0.9524 | 0.5125 | 0.598107 | 1 | 13742 | tags=44%, list=2 |
| GO_ESTAB  | GO_ESTABLISHMEN   | 417 | -0.2437 | -0.9414 | 0.5132 | 0.609741 | 1 | 6630  | tags=20%, list=1 |
| GO_SEN    | GO_SENSORY_PERCI  | 166 | -0.28   | -0.9703 | 0.5139 | 0.583547 | 1 | 16160 | tags=37%, list=2 |
| GO_MEMBI  | GO_MEMBRANE_REF   | 17  | -0.3426 | -0.9419 | 0.5144 | 0.610456 | 1 | 2848  | tags=18%, list=5 |
| GO_NUCLE  | GO_NUCLEAR_OUTE   | 27  | -0.292  | -0.9519 | 0.5145 | 0.598271 | 1 | 18929 | tags=37%, list=3 |
| GO_CRISTA | GO_CRISTAE_FORMA  | 18  | -0.3279 | -0.9454 | 0.515  | 0.606257 | 1 | 4162  | tags=22%, list=7 |
| GO_GLYCIN | GO_GLYCINE_METAB  | 15  | -0.3602 | -0.9537 | 0.5154 | 0.596761 | 1 | 16964 | tags=47%, list=2 |
| GO_RETRO  | GO_RETROMER_COM   | 20  | -0.3562 | -0.9413 | 0.5154 | 0.609114 | 1 | 6486  | tags=25%, list=1 |
| GO_POSIT  | GO_POSITIVE_REGUL | 389 | -0.2512 | -0.9569 | 0.5158 | 0.59329  | 1 | 11153 | tags=25%, list=1 |
| GO_NUCLE  | GO_NUCLEAR_PORE   | 83  | -0.2943 | -0.9297 | 0.5159 | 0.620196 | 1 | 10044 | tags=29%, list=1 |
| GO_REGUL  | GO_REGULATION_OF  | 15  | -0.3591 | -0.9681 | 0.5161 | 0.584352 | 1 | 17557 | tags=47%, list=3 |
| GO_PRERIE | GO_PRERIBOSOME_I  | 23  | -0.3784 | -0.9399 | 0.5163 | 0.609744 | 1 | 3469  | tags=22%, list=6 |
| GO_BILE_A | GO_BILE_ACID_MET. | 48  | -0.2665 | -0.951  | 0.5164 | 0.598494 | 1 | 9049  | tags=23%, list=1 |
| GO_REGUL  | GO_REGULATION_OF  | 36  | -0.3301 | -0.9688 | 0.5172 | 0.584024 | 1 | 13742 | tags=42%, list=2 |
| GO_HORMO  | GO_HORMONE_METAB  | 215 | -0.2261 | -0.9632 | 0.5172 | 0.587771 | 1 | 15827 | tags=32%, list=2 |
| GO_MIRNA  | GO_MIRNA_METABC   | 26  | -0.3486 | -0.9579 | 0.5174 | 0.592913 | 1 | 5380  | tags=23%, list=9 |
| GO_NEGAT  | GO_NEGATIVE_REGU  | 38  | -0.2849 | -0.9738 | 0.5176 | 0.580251 | 1 | 8882  | tags=26%, list=1 |
| GO_NEURC  | GO_NEUROTRANSMI   | 27  | -0.3661 | -0.9656 | 0.5176 | 0.585714 | 1 | 10511 | tags=41%, list=1 |
| GO_MORPH  | GO_MORPHOGENESI   | 55  | -0.2836 | -0.9511 | 0.518  | 0.598759 | 1 | 4326  | tags=20%, list=7 |
| GO_ADENY  | GO_ADENYLATE_CY   | 125 | -0.2666 | -0.951  | 0.5181 | 0.598592 | 1 | 20038 | tags=54%, list=3 |
| GO_PRONU  | GO_PRONUCLEUS     | 15  | -0.4154 | -0.9613 | 0.5198 | 0.58893  | 1 | 2606  | tags=20%, list=4 |
| GO_HETER  | GO_HETEROCHROMA   | 49  | -0.3121 | -0.9638 | 0.522  | 0.587532 | 1 | 6893  | tags=27%, list=1 |
| GO_REGUL  | GO_REGULATION_OF  | 25  | -0.3118 | -0.9453 | 0.5224 | 0.606108 | 1 | 17429 | tags=44%, list=3 |
| GO_CHROM  | GO_CHROMATIN_AS   | 143 | -0.2933 | -0.9243 | 0.5242 | 0.62424  | 1 | 4155  | tags=19%, list=7 |
| GO_NEGAT  | GO_NEGATIVE_REGU  | 65  | -0.2565 | -0.9369 | 0.5251 | 0.611854 | 1 | 3334  | tags=17%, list=6 |
| GO_REGUL  | GO_REGULATION_OF  | 16  | -0.3183 | -0.9421 | 0.5252 | 0.610441 | 1 | 23440 | tags=56%, list=4 |

|                   |     |         |         |        |          |   |       |                   |
|-------------------|-----|---------|---------|--------|----------|---|-------|-------------------|
| GO_APICOLATERAL_  | 19  | -0.3268 | -0.9589 | 0.5268 | 0.591781 | 1 | 8956  | tags=26%, list=1. |
| GO_HISTONE_H4_K5_ | 16  | -0.4083 | -0.9721 | 0.5273 | 0.58139  | 1 | 10844 | tags=38%, list=1. |
| GO_POLYSACCHARII  | 77  | -0.2555 | -0.9416 | 0.5278 | 0.610404 | 1 | 20825 | tags=49%, list=3. |
| GO_RESPONSE_TO_M  | 19  | -0.3187 | -0.9427 | 0.5279 | 0.609669 | 1 | 19889 | tags=47%, list=3. |
| GO_SISTER_CHROMA  | 54  | -0.3353 | -0.9595 | 0.5284 | 0.590993 | 1 | 20697 | tags=56%, list=3. |
| GO_REGULATION_OI  | 24  | -0.3228 | -0.9416 | 0.5286 | 0.61014  | 1 | 9919  | tags=25%, list=1. |
| GO_REGULATION_OI  | 101 | -0.3253 | -0.9451 | 0.5286 | 0.60632  | 1 | 17523 | tags=43%, list=3. |
| GO_GLIAL_CELL_PR  | 33  | -0.3235 | -0.9392 | 0.5288 | 0.609424 | 1 | 16357 | tags=45%, list=2. |
| GO_ENDORIBONUCL   | 29  | -0.3437 | -0.9402 | 0.5289 | 0.609607 | 1 | 5361  | tags=21%, list=9. |
| GO_NEURON_DEATH   | 27  | -0.3074 | -0.9415 | 0.5291 | 0.609828 | 1 | 11000 | tags=33%, list=1. |
| GO_ENDODERM_FOF   | 54  | -0.3017 | -0.9353 | 0.5305 | 0.613426 | 1 | 10951 | tags=33%, list=1. |
| GO_NEGATIVE_REGU  | 18  | -0.3131 | -0.911  | 0.5309 | 0.63537  | 1 | 7458  | tags=33%, list=1. |
| GO_RESPONSE_TO_I' | 31  | -0.2928 | -0.9364 | 0.531  | 0.612248 | 1 | 7944  | tags=19%, list=1. |
| GO_VESICLE_MEDIA  | 41  | -0.281  | -0.9246 | 0.531  | 0.623916 | 1 | 5006  | tags=20%, list=9. |
| GO_POSITIVE_REGUI | 25  | -0.3425 | -0.9681 | 0.5314 | 0.58396  | 1 | 5634  | tags=28%, list=1. |
| GO_INTRACILIARY_I | 19  | -0.371  | -0.9553 | 0.5315 | 0.595593 | 1 | 5992  | tags=21%, list=1. |
| GO_POSITIVE_REGUI | 33  | -0.2883 | -0.9411 | 0.5315 | 0.608871 | 1 | 15621 | tags=39%, list=2. |
| GO_MATURATION_O   | 15  | -0.4062 | -0.9478 | 0.5315 | 0.602858 | 1 | 23194 | tags=73%, list=4. |
| GO_REGULATION_OI  | 75  | -0.2692 | -0.9523 | 0.5322 | 0.598144 | 1 | 12883 | tags=31%, list=2. |
| GO_ESTABLISHMEN'  | 23  | -0.3605 | -0.9429 | 0.5322 | 0.609648 | 1 | 10459 | tags=30%, list=1. |
| GO_DIOL_BIOSYNTH  | 22  | -0.3217 | -0.9413 | 0.5336 | 0.609328 | 1 | 6020  | tags=23%, list=1. |
| GO_POSITIVE_REGUI | 23  | -0.3623 | -0.9306 | 0.5342 | 0.619104 | 1 | 16562 | tags=39%, list=2. |
| GO_PEPTIDYL_SERIN | 326 | -0.2312 | -0.9379 | 0.5352 | 0.610809 | 1 | 12398 | tags=29%, list=2. |
| GO_NEGATIVE_REGU  | 19  | -0.3768 | -0.9534 | 0.5355 | 0.596965 | 1 | 8687  | tags=37%, list=1. |
| GO_CELLULAR_POL'  | 23  | -0.3091 | -0.9399 | 0.5356 | 0.609358 | 1 | 14094 | tags=43%, list=2. |
| GO_CULLIN_RING_U  | 156 | -0.2499 | -0.9293 | 0.5363 | 0.620025 | 1 | 6450  | tags=19%, list=1. |
| GO_SPERMATID_NUC  | 19  | -0.3417 | -0.923  | 0.5363 | 0.625454 | 1 | 11656 | tags=37%, list=2. |
| GO_REGULATION_OI  | 26  | -0.3269 | -0.9512 | 0.5364 | 0.598971 | 1 | 12233 | tags=38%, list=2. |
| GO_MAMMARY_GLA    | 45  | -0.2687 | -0.9533 | 0.5365 | 0.596876 | 1 | 6450  | tags=27%, list=1. |
| GO_ENDONUCLEASE   | 42  | -0.3014 | -0.9191 | 0.537  | 0.628155 | 1 | 10581 | tags=24%, list=1. |
| GO_POSITIVE_REGUI | 69  | -0.2833 | -0.9345 | 0.5373 | 0.614034 | 1 | 9573  | tags=26%, list=1. |
| GO_ORGANIC_CATIC  | 49  | -0.2702 | -0.9287 | 0.5377 | 0.620312 | 1 | 9389  | tags=27%, list=1. |
| GO_TRANSCRIPTION  | 29  | -0.2788 | -0.9254 | 0.5377 | 0.623396 | 1 | 8815  | tags=24%, list=1. |
| GO_NEGATIVE_REGU  | 37  | -0.3757 | -0.9463 | 0.5391 | 0.605071 | 1 | 11360 | tags=35%, list=1. |
| GO_POSITIVE_REGUI | 23  | -0.3078 | -0.9407 | 0.5411 | 0.609013 | 1 | 10511 | tags=35%, list=1. |
| GO_REGULATION_OI  | 60  | -0.2807 | -0.9178 | 0.5412 | 0.628917 | 1 | 11664 | tags=33%, list=2. |
| GO_RNA_POLYMERA   | 18  | -0.3402 | -0.9287 | 0.5413 | 0.62017  | 1 | 10889 | tags=33%, list=1. |
| GO_POSITIVE_REGUI | 162 | -0.2404 | -0.9335 | 0.5413 | 0.614998 | 1 | 10105 | tags=25%, list=1. |
| GO_APICAL_DENDRI  | 18  | -0.3432 | -0.9358 | 0.5417 | 0.612692 | 1 | 10937 | tags=28%, list=1. |
| GO_POLY_PURINE_T  | 29  | -0.328  | -0.9418 | 0.5417 | 0.610406 | 1 | 10103 | tags=24%, list=1. |
| GO_ENDODERMAL_C   | 45  | -0.307  | -0.9124 | 0.5423 | 0.634518 | 1 | 10888 | tags=36%, list=1. |
| GO_MITOCHONDRIA   | 16  | -0.3589 | -0.9398 | 0.5424 | 0.608953 | 1 | 8465  | tags=31%, list=1. |
| GO_RETINAL_GANGI  | 20  | -0.3422 | -0.9212 | 0.5431 | 0.627722 | 1 | 5001  | tags=20%, list=9. |
| GO_REGULATION_OI  | 151 | -0.2952 | -0.9211 | 0.5434 | 0.627701 | 1 | 16716 | tags=36%, list=2. |
| GO_ACTININ_BINDIN | 36  | -0.306  | -0.9199 | 0.5438 | 0.627843 | 1 | 12326 | tags=39%, list=2. |
| GO_AUDITORY_RECIB | 19  | -0.3473 | -0.9399 | 0.5444 | 0.609605 | 1 | 1855  | tags=16%, list=3. |
| GO_ETHANOL_META   | 22  | -0.3226 | -0.9276 | 0.5445 | 0.621466 | 1 | 15748 | tags=41%, list=2. |
| GO_VESICLE_TRANS  | 46  | -0.2969 | -0.9336 | 0.5446 | 0.614956 | 1 | 6170  | tags=22%, list=1. |
| GO_SECONDARY_ME   | 59  | -0.2586 | -0.9416 | 0.5448 | 0.609908 | 1 | 15827 | tags=32%, list=2. |
| GO_MONOVALENT_I   | 158 | -0.2402 | -0.9384 | 0.5451 | 0.61041  | 1 | 10114 | tags=24%, list=1. |
| GO_NEGATIVE_REGU  | 30  | -0.2818 | -0.9296 | 0.5453 | 0.619928 | 1 | 10299 | tags=27%, list=1. |
| GO_REGULATION_OI  | 94  | -0.2402 | -0.9515 | 0.5456 | 0.598629 | 1 | 20825 | tags=49%, list=3. |
| GO_CHONDROITIN_S  | 43  | -0.308  | -0.9262 | 0.5456 | 0.622553 | 1 | 19068 | tags=51%, list=3. |
| GO_POSITIVE_REGUI | 58  | -0.2665 | -0.9366 | 0.5462 | 0.612048 | 1 | 9790  | tags=24%, list=1. |
| GO_AXON_ENSHEAT   | 23  | -0.3009 | -0.9375 | 0.5464 | 0.611019 | 1 | 11233 | tags=26%, list=1. |
| GO_A_BAND         | 37  | -0.2905 | -0.9175 | 0.5465 | 0.629051 | 1 | 6954  | tags=22%, list=1. |
| GO_RELAXATION_OI  | 30  | -0.3135 | -0.9317 | 0.547  | 0.617434 | 1 | 14054 | tags=43%, list=2. |
| GO_TRNA_METHYL    | 32  | -0.3115 | -0.895  | 0.5472 | 0.653225 | 1 | 16653 | tags=44%, list=2. |

|           |                   |     |         |         |        |          |   |       |                  |
|-----------|-------------------|-----|---------|---------|--------|----------|---|-------|------------------|
| GO_POSITI | GO_POSITIVE_REGUL | 16  | -0.3183 | -0.9198 | 0.5476 | 0.627764 | 1 | 3630  | tags=19%, list=6 |
| GO_NEUTR  | GO_NEUTRAL_LIPID  | 135 | -0.2376 | -0.9407 | 0.5479 | 0.609202 | 1 | 10468 | tags=22%, list=1 |
| GO_NEURC  | GO_NEURON_MATUR   | 46  | -0.2799 | -0.9275 | 0.5482 | 0.621445 | 1 | 11099 | tags=33%, list=1 |
| GO_ASpar  | GO ASPARTATE_FAM  | 21  | -0.3299 | -0.9361 | 0.5491 | 0.612458 | 1 | 3280  | tags=14%, list=6 |
| GO_NUCLE  | GO_NUCLEAR_MEMB   | 282 | -0.2349 | -0.9205 | 0.5491 | 0.627954 | 1 | 9389  | tags=24%, list=1 |
| GO_MITOT  | GO_MITOTIC_SPIND  | 111 | -0.3018 | -0.9187 | 0.5504 | 0.628464 | 1 | 8019  | tags=22%, list=1 |
| GO_NEGAT  | GO_NEGATIVE_REGU  | 78  | -0.2697 | -0.9496 | 0.5509 | 0.600369 | 1 | 2658  | tags=13%, list=5 |
| GO_REGUL  | GO_REGULATION_OI  | 17  | -0.3154 | -0.9234 | 0.5509 | 0.624929 | 1 | 5959  | tags=24%, list=1 |
| GO_SPIND  | GO_SPINDLE_ORGAN  | 174 | -0.2786 | -0.911  | 0.5521 | 0.635868 | 1 | 8019  | tags=22%, list=1 |
| GO_RESPO  | GO_RESPONSE_TO_P  | 30  | -0.2978 | -0.9288 | 0.5535 | 0.620512 | 1 | 15363 | tags=43%, list=2 |
| GO_PEPTID | GO PEPTIDE_RECEP  | 151 | -0.2511 | -0.92   | 0.5542 | 0.627929 | 1 | 13464 | tags=36%, list=2 |
| GO_MICRO  | GO_MICROTUBULE_(  | 137 | -0.3027 | -0.9206 | 0.5542 | 0.627978 | 1 | 8171  | tags=23%, list=1 |
| GO_RETIN  | GO_RETINOIC_ACID  | 33  | -0.305  | -0.924  | 0.5545 | 0.624479 | 1 | 11335 | tags=30%, list=1 |
| GO_REGUL  | GO_REGULATION_OI  | 185 | -0.2392 | -0.9184 | 0.5547 | 0.628288 | 1 | 9173  | tags=23%, list=1 |
| GO_VESIC  | GO_VESICLE_TARGE  | 92  | -0.2669 | -0.9132 | 0.5551 | 0.633907 | 1 | 15968 | tags=36%, list=2 |
| GO_NEGAT  | GO_NEGATIVE_REGU  | 86  | -0.2447 | -0.9251 | 0.5551 | 0.623649 | 1 | 15632 | tags=28%, list=2 |
| GO_SPIND  | GO SPINDLE        | 351 | -0.2563 | -0.8886 | 0.5553 | 0.659942 | 1 | 12046 | tags=26%, list=2 |
| GO_ACYL_  | GO_ACYL_COA_LIGA  | 16  | -0.3567 | -0.9449 | 0.5558 | 0.606381 | 1 | 8465  | tags=19%, list=1 |
| GO_RESPO  | GO_RESPONSE_TO_S  | 27  | -0.2783 | -0.9297 | 0.5562 | 0.620038 | 1 | 16894 | tags=37%, list=2 |
| GO_RESPO  | GO_RESPONSE_TO_A  | 34  | -0.2778 | -0.9398 | 0.5564 | 0.609101 | 1 | 16041 | tags=41%, list=2 |
| GO_POLAR  | GO_POLARIZED_EPI  | 22  | -0.2981 | -0.9274 | 0.5579 | 0.62133  | 1 | 13615 | tags=32%, list=2 |
| GO_FAD_BI | GO_FAD_BINDING    | 32  | -0.2772 | -0.9256 | 0.5583 | 0.623221 | 1 | 9494  | tags=25%, list=1 |
| GO_POSITI | GO_POSITIVE_REGUL | 15  | -0.3483 | -0.911  | 0.5584 | 0.6356   | 1 | 9858  | tags=27%, list=1 |
| GO_PROTE  | GO PROTEIN_CONTA  | 32  | -0.3193 | -0.9192 | 0.5589 | 0.628385 | 1 | 6746  | tags=22%, list=1 |
| GO_SEX_DI | GO_SEX_DETERMIN   | 24  | -0.3057 | -0.9347 | 0.5592 | 0.614149 | 1 | 11652 | tags=33%, list=2 |
| GO_3_PHO  | GO_3_PHOSPHOADE   | 23  | -0.2941 | -0.9135 | 0.5595 | 0.633714 | 1 | 15354 | tags=39%, list=2 |
| GO_NEGAT  | GO_NEGATIVE_REGU  | 32  | -0.2988 | -0.9203 | 0.5605 | 0.627759 | 1 | 24245 | tags=66%, list=4 |
| GO_RESPO  | GO_RESPONSE_TO_A  | 47  | -0.2597 | -0.9466 | 0.5607 | 0.604801 | 1 | 8929  | tags=28%, list=1 |
| GO_POSITI | GO_POSITIVE_REGUL | 36  | -0.3012 | -0.892  | 0.5613 | 0.656161 | 1 | 6594  | tags=22%, list=1 |
| GO_LAMEL  | GO LAMELLIPODIUM  | 67  | -0.263  | -0.9219 | 0.5618 | 0.626911 | 1 | 4975  | tags=19%, list=9 |
| GO_COLL   | GO COLLAGEN_BIO   | 52  | -0.2892 | -0.8885 | 0.562  | 0.659916 | 1 | 10863 | tags=29%, list=1 |
| GO_REGUL  | GO_REGULATION_OI  | 62  | -0.2591 | -0.9249 | 0.5631 | 0.623737 | 1 | 8882  | tags=26%, list=1 |
| GO_BASEM  | GO BASEMENT_MEM   | 15  | -0.3586 | -0.8932 | 0.564  | 0.654719 | 1 | 7550  | tags=40%, list=1 |
| GO_REGUL  | GO_REGULATION_OI  | 47  | -0.286  | -0.8967 | 0.5643 | 0.652383 | 1 | 10863 | tags=28%, list=1 |
| GO_LAMEL  | GO LAMELLIPODIUM  | 17  | -0.3214 | -0.9269 | 0.5645 | 0.621857 | 1 | 8823  | tags=24%, list=1 |
| GO_ALCOH  | GO ALCOHOL_BINDI  | 86  | -0.2425 | -0.9347 | 0.5645 | 0.613974 | 1 | 14556 | tags=34%, list=2 |
| GO_CHROM  | GO_CHROMATIN_RE   | 182 | -0.2698 | -0.8984 | 0.5651 | 0.651255 | 1 | 6893  | tags=20%, list=1 |
| GO_REGUL  | GO_REGULATION_OI  | 22  | -0.357  | -0.9136 | 0.5656 | 0.633906 | 1 | 12756 | tags=36%, list=2 |
| GO_CENTR  | GO CENTRIOLE_ASS  | 38  | -0.3257 | -0.8897 | 0.5665 | 0.658795 | 1 | 12794 | tags=34%, list=2 |
| GO_ANOIK  | GO ANOIKIS        | 33  | -0.28   | -0.9156 | 0.5666 | 0.63141  | 1 | 9443  | tags=30%, list=1 |
| GO_OLIGO  | GO OLIGODENDROC   | 103 | -0.2403 | -0.9341 | 0.5667 | 0.614496 | 1 | 8082  | tags=20%, list=1 |
| GO_FLAVO  | GO FLAVONOID_ME   | 16  | -0.3499 | -0.8919 | 0.5668 | 0.656135 | 1 | 12725 | tags=38%, list=2 |
| GO_CONDE  | GO CONDENSED_NU   | 94  | -0.286  | -0.8933 | 0.5672 | 0.655151 | 1 | 13830 | tags=34%, list=2 |
| GO_INNER  | GO INNER_EAR_REC  | 40  | -0.2975 | -0.9219 | 0.5677 | 0.627134 | 1 | 16160 | tags=38%, list=2 |
| GO_REVER  | GO REVERSE_CHOLI  | 20  | -0.3334 | -0.921  | 0.5678 | 0.627667 | 1 | 6746  | tags=15%, list=1 |
| GO_CYTOS  | GO CYTOSKELETON   | 85  | -0.2744 | -0.9004 | 0.5679 | 0.648852 | 1 | 8593  | tags=22%, list=1 |
| GO_PHOSPI | GO PHOSPHOLIPID_  | 19  | -0.303  | -0.9146 | 0.5681 | 0.632397 | 1 | 24757 | tags=63%, list=4 |
| GO_ATP_DI | GO ATP_DEPENDEN   | 72  | -0.3015 | -0.8761 | 0.5684 | 0.6741   | 1 | 8549  | tags=24%, list=1 |
| GO_HISTO  | GO HISTONE_DEACE  | 75  | -0.2834 | -0.8982 | 0.5697 | 0.651376 | 1 | 8882  | tags=25%, list=1 |
| GO_PODOS  | GO_PODOSOME       | 29  | -0.3104 | -0.8952 | 0.57   | 0.653142 | 1 | 10477 | tags=34%, list=1 |
| GO_NUCLE  | GO_NUCLEOCYTOPL   | 29  | -0.3683 | -0.9171 | 0.5706 | 0.629281 | 1 | 8809  | tags=34%, list=1 |
| GO_NEGAT  | GO_NEGATIVE_REGU  | 15  | -0.3384 | -0.9278 | 0.5706 | 0.621429 | 1 | 24735 | tags=53%, list=4 |
| GO_METAP  | GO METAPHASE_AN   | 60  | -0.3166 | -0.8932 | 0.5706 | 0.65491  | 1 | 17523 | tags=40%, list=3 |
| GO_POSITI | GO_POSITIVE_REGUL | 19  | -0.3209 | -0.9132 | 0.5709 | 0.633651 | 1 | 20441 | tags=47%, list=3 |
| GO_RESPO  | GO_RESPONSE_TO_C  | 106 | -0.2394 | -0.9197 | 0.5714 | 0.627671 | 1 | 9204  | tags=23%, list=1 |
| GO_BASAL  | GO BASAL_PLASMA   | 50  | -0.2687 | -0.9187 | 0.572  | 0.628192 | 1 | 9810  | tags=26%, list=1 |
| GO_C21_ST | GO_C21_STEROID_HC | 24  | -0.2872 | -0.9299 | 0.5729 | 0.620183 | 1 | 5959  | tags=21%, list=1 |
| GO_INCLU  | GO INCLUSION_BOD  | 76  | -0.2482 | -0.9105 | 0.573  | 0.635924 | 1 | 7861  | tags=22%, list=1 |

|                   |                            |     |         |         |        |          |   |       |                  |
|-------------------|----------------------------|-----|---------|---------|--------|----------|---|-------|------------------|
| GO_NUCLE          | GO_NUCLEAR_UBIQUITINATION  | 42  | -0.2859 | -0.8758 | 0.5731 | 0.673864 | 1 | 5398  | tags=19%, list=9 |
| GO_ANION          | GO_ANION_HOMEOSTASIS       | 61  | -0.2675 | -0.9146 | 0.5734 | 0.632657 | 1 | 15534 | tags=38%, list=2 |
| GO_ENTRY          | GO_ENTRY_OF_BACTERIA       | 15  | -0.359  | -0.8975 | 0.574  | 0.651462 | 1 | 441   | tags=13%, list=1 |
| GO_POSITIVE       | GO_POSITIVE_REGULATION     | 43  | -0.2606 | -0.9174 | 0.575  | 0.629028 | 1 | 6208  | tags=19%, list=1 |
| GO_NUCLE          | GO_NUCLEAR_TRANSCRIPTION   | 72  | -0.2539 | -0.8943 | 0.575  | 0.653957 | 1 | 7449  | tags=19%, list=1 |
| GO_NEGATIVE       | GO_NEGATIVE_REGULATION     | 25  | -0.3012 | -0.9162 | 0.5752 | 0.630583 | 1 | 12168 | tags=40%, list=2 |
| GO_U1_SNI         | GO_U1_SNRNP                | 33  | -0.3231 | -0.9039 | 0.5755 | 0.644295 | 1 | 7422  | tags=27%, list=1 |
| GO_MITOTIC        | GO_MITOTIC_DNA_REPLICATION | 15  | -0.3914 | -0.9014 | 0.5764 | 0.647951 | 1 | 5672  | tags=20%, list=1 |
| GO_HEPARAN        | GO_HEPARAN_SULFATION       | 32  | -0.2987 | -0.915  | 0.5766 | 0.632229 | 1 | 3026  | tags=16%, list=5 |
| GO_NEGATIVE       | GO_NEGATIVE_REGULATION     | 18  | -0.3344 | -0.8737 | 0.5767 | 0.675791 | 1 | 2649  | tags=17%, list=5 |
| GO_RNA_POLYMERASE | GO_RNA_POLYMERASE          | 46  | -0.2822 | -0.8878 | 0.5768 | 0.660027 | 1 | 5662  | tags=24%, list=1 |
| GO_L_ASCORBIC     | GO_L_ASCORBIC_ACID         | 20  | -0.3305 | -0.8956 | 0.5775 | 0.653188 | 1 | 12094 | tags=35%, list=2 |
| GO_REGULATION     | GO_REGULATION_OF           | 15  | -0.3312 | -0.8966 | 0.5781 | 0.652357 | 1 | 3910  | tags=20%, list=7 |
| GO_EPOXYGENASE    | GO_EPOXYGENASE             | 20  | -0.3316 | -0.9047 | 0.5787 | 0.643176 | 1 | 16530 | tags=45%, list=2 |
| GO_ESTABLISHMENT  | GO_ESTABLISHMENT           | 18  | -0.3631 | -0.8976 | 0.5792 | 0.651625 | 1 | 8398  | tags=28%, list=1 |
| GO_NUCLEAR        | GO_NUCLEAR_IMPACT          | 19  | -0.3606 | -0.8925 | 0.5796 | 0.655613 | 1 | 8809  | tags=37%, list=1 |
| GO_REGULATION     | GO_REGULATION_OF           | 16  | -0.3548 | -0.9006 | 0.5799 | 0.648796 | 1 | 15919 | tags=50%, list=2 |
| GO_SKIN_EPIDERMIS | GO_SKIN_EPIDERMIS          | 90  | -0.2541 | -0.8962 | 0.5813 | 0.652704 | 1 | 8635  | tags=21%, list=1 |
| GO_PEPTIDYL       | GO_PEPTIDYL_ARGININE       | 27  | -0.2918 | -0.9114 | 0.5814 | 0.63581  | 1 | 10781 | tags=22%, list=1 |
| GO_H4_HISTONE     | GO_H4_HISTONE_ACETYLATION  | 44  | -0.3077 | -0.8937 | 0.5819 | 0.654629 | 1 | 18074 | tags=45%, list=3 |
| GO_CLEAVAGE       | GO_CLEAVAGE_FURAN          | 50  | -0.2692 | -0.8855 | 0.5825 | 0.662916 | 1 | 11638 | tags=32%, list=2 |
| GO_HISTONE        | GO_HISTONE_H3_K4           | 18  | -0.3737 | -0.9077 | 0.5838 | 0.638916 | 1 | 17788 | tags=44%, list=3 |
| GO_NEGATIVE       | GO_NEGATIVE_REGULATION     | 119 | -0.2314 | -0.9189 | 0.5845 | 0.628359 | 1 | 15632 | tags=29%, list=2 |
| GO_POSITIVE       | GO_POSITIVE_REGULATION     | 35  | -0.2787 | -0.91   | 0.5848 | 0.63589  | 1 | 11621 | tags=23%, list=2 |
| GO_DNA_HELICASE   | GO_DNA_HELICASE            | 75  | -0.3072 | -0.8832 | 0.5848 | 0.666232 | 1 | 9177  | tags=24%, list=1 |
| GO_ENDONUCLEOLY   | GO_ENDONUCLEOLY            | 16  | -0.366  | -0.8819 | 0.5849 | 0.667436 | 1 | 2603  | tags=19%, list=4 |
| GO_TRANSFERASE    | GO_TRANSFERASE             | 18  | -0.3187 | -0.8952 | 0.585  | 0.653408 | 1 | 5103  | tags=22%, list=9 |
| GO_REGULATION     | GO_REGULATION_OF           | 46  | -0.2759 | -0.8787 | 0.5858 | 0.671518 | 1 | 12598 | tags=30%, list=2 |
| GO_RESPONSE_TO_A  | GO_RESPONSE_TO_A           | 33  | -0.2788 | -0.8945 | 0.5859 | 0.653763 | 1 | 7648  | tags=21%, list=1 |
| GO_REGULATION     | GO_REGULATION_OF           | 171 | -0.2338 | -0.8879 | 0.586  | 0.660146 | 1 | 9141  | tags=23%, list=1 |
| GO_TELOMERE       | GO_TELOMERE_MAINTENANCE    | 78  | -0.273  | -0.8656 | 0.586  | 0.682952 | 1 | 6594  | tags=19%, list=1 |
| GO_REGULATION     | GO_REGULATION_OF           | 51  | -0.3185 | -0.8725 | 0.5861 | 0.676904 | 1 | 8399  | tags=24%, list=1 |
| GO_RNA_POLYMERASE | GO_RNA_POLYMERASE          | 43  | -0.2903 | -0.8833 | 0.5878 | 0.666408 | 1 | 7398  | tags=26%, list=1 |
| GO_DNA_DEMETHYL   | GO_DNA_DEMETHYLATION       | 27  | -0.2982 | -0.8962 | 0.5883 | 0.652482 | 1 | 943   | tags=15%, list=2 |
| GO_CELLULAR       | GO_CELLULAR_RESPONSE       | 18  | -0.3063 | -0.9113 | 0.5889 | 0.635724 | 1 | 19375 | tags=50%, list=3 |
| GO_MONOSACCHARI   | GO_MONOSACCHARIDES         | 286 | -0.2124 | -0.906  | 0.5893 | 0.641187 | 1 | 9806  | tags=21%, list=1 |
| GO_RAN_GTPASE     | GO_RAN_GTPASE_BINDING      | 41  | -0.2859 | -0.8648 | 0.5893 | 0.683851 | 1 | 9626  | tags=24%, list=1 |
| GO_COLUMNAR       | GO_COLUMNAR_CULMINATION    | 60  | -0.2661 | -0.9099 | 0.5894 | 0.63586  | 1 | 6208  | tags=18%, list=1 |
| GO_CONNEXIN       | GO_CONNEXIN_COMPLEX        | 21  | -0.3037 | -0.9102 | 0.5905 | 0.636139 | 1 | 6854  | tags=29%, list=1 |
| GO_GAP_JUNCTION   | GO_GAP_JUNCTION            | 21  | -0.3037 | -0.9102 | 0.5905 | 0.635865 | 1 | 6854  | tags=29%, list=1 |
| GO_CARBOHYDRATE   | GO_CARBOHYDRATE            | 21  | -0.3075 | -0.8917 | 0.5924 | 0.656111 | 1 | 15701 | tags=38%, list=2 |
| GO_RNA_INTERFERE  | GO_RNA_INTERFERENCE        | 17  | -0.3575 | -0.8773 | 0.5934 | 0.673346 | 1 | 5902  | tags=24%, list=1 |
| GO_NEGATIVE       | GO_NEGATIVE_REGULATION     | 43  | -0.2566 | -0.9125 | 0.5935 | 0.634583 | 1 | 10490 | tags=28%, list=1 |
| GO_MONOCARBOXY    | GO_MONOCARBOXY             | 171 | -0.2221 | -0.9321 | 0.5941 | 0.617131 | 1 | 16401 | tags=34%, list=2 |
| GO_PROTEIN_OXIDA  | GO_PROTEIN_OXIDATION       | 15  | -0.3378 | -0.8997 | 0.5949 | 0.649827 | 1 | 6746  | tags=27%, list=1 |
| GO_STEREOCILIUM   | GO_STEREOCILIUM            | 18  | -0.3376 | -0.9097 | 0.5953 | 0.635858 | 1 | 15397 | tags=50%, list=2 |
| GO_CLATHRIN       | GO_CLATHRIN_COATED         | 16  | -0.3329 | -0.8992 | 0.5969 | 0.65041  | 1 | 11018 | tags=44%, list=1 |
| GO_PHOSPHATIDYL   | GO_PHOSPHATIDYL            | 17  | -0.3071 | -0.8978 | 0.5972 | 0.65155  | 1 | 24285 | tags=59%, list=4 |
| GO_CENTROSOME     | GO_CENTROSOME_DYSFUNCTION  | 66  | -0.2898 | -0.8567 | 0.598  | 0.691629 | 1 | 12794 | tags=36%, list=2 |
| GO_NEGATIVE       | GO_NEGATIVE_REGULATION     | 51  | -0.2673 | -0.9236 | 0.5985 | 0.62496  | 1 | 6745  | tags=24%, list=1 |
| GO_CYTOKINESIS    | GO_CYTOKINESIS             | 156 | -0.252  | -0.8823 | 0.5988 | 0.66696  | 1 | 11646 | tags=24%, list=2 |
| GO_FOUR_WAY       | GO_FOUR_WAY_JUNCTION       | 17  | -0.3842 | -0.8792 | 0.5992 | 0.670882 | 1 | 12831 | tags=41%, list=2 |
| GO_REGULATION     | GO_REGULATION_OF           | 15  | -0.3505 | -0.9094 | 0.6008 | 0.636246 | 1 | 6429  | tags=20%, list=1 |
| GO_HYDROGEN       | GO_HYDROGEN_PEROXIDE       | 32  | -0.2824 | -0.9024 | 0.6015 | 0.646642 | 1 | 4675  | tags=16%, list=8 |
| GO_REGULATION     | GO_REGULATION_OF           | 50  | -0.2522 | -0.8992 | 0.6029 | 0.650232 | 1 | 12398 | tags=32%, list=2 |
| GO_MICROTUBULE    | GO_MICROTUBULE             | 132 | -0.2591 | -0.8356 | 0.6035 | 0.717421 | 1 | 14975 | tags=34%, list=2 |
| GO_DIOL_METABOLI  | GO_DIOL_METABOLISM         | 25  | -0.2877 | -0.8702 | 0.604  | 0.679331 | 1 | 6020  | tags=20%, list=1 |
| GO_CELL_MATURAT   | GO_CELL_MATURATION         | 170 | -0.2243 | -0.9204 | 0.6045 | 0.627871 | 1 | 10220 | tags=22%, list=1 |



|           |                    |     |         |         |        |          |   |       |                   |
|-----------|--------------------|-----|---------|---------|--------|----------|---|-------|-------------------|
| GO_TRANS  | GO_TRANSLATION_F   | 80  | -0.2708 | -0.8866 | 0.6055 | 0.661625 | 1 | 5882  | tags=16%, list=1' |
| GO_POSTS' | GO_POSTSYNAPTIC_   | 20  | -0.3316 | -0.901  | 0.6057 | 0.648305 | 1 | 10511 | tags=40%, list=1' |
| GO_NEGAT  | GO_NEGATIVE_REGU   | 19  | -0.3029 | -0.8828 | 0.606  | 0.666694 | 1 | 12168 | tags=42%, list=2  |
| GO_HISTO  | GO_HISTONE_DEACE   | 112 | -0.2366 | -0.8794 | 0.606  | 0.670726 | 1 | 8882  | tags=21%, list=1. |
| GO_CONDE  | GO_CONDENSED_CH    | 205 | -0.2766 | -0.8535 | 0.6062 | 0.695466 | 1 | 17779 | tags=38%, list=3' |
| GO_POSIT' | GO_POSITIVE_REGUI  | 37  | -0.2872 | -0.8685 | 0.6068 | 0.681223 | 1 | 8067  | tags=27%, list=1. |
| GO_SMALL  | GO_SMALL_NUCLEA    | 95  | -0.2783 | -0.8749 | 0.607  | 0.67421  | 1 | 12984 | tags=31%, list=2  |
| GO_ORGAN  | GO_ORGANOPHOSPF    | 129 | -0.2204 | -0.898  | 0.6072 | 0.651396 | 1 | 10619 | tags=26%, list=1  |
| GO_SPERM  | GO_SPERMATID_DIF   | 152 | -0.2335 | -0.9073 | 0.6074 | 0.639369 | 1 | 15236 | tags=32%, list=2  |
| GO_STERO  | GO_STEROID_META    | 326 | -0.2117 | -0.918  | 0.6081 | 0.628713 | 1 | 5277  | tags=14%, list=9  |
| GO_POLY_I | GO_POLY_PYRIMIDI   | 29  | -0.2905 | -0.8556 | 0.6081 | 0.692261 | 1 | 9657  | tags=28%, list=1' |
| GO_DERMA  | GO_DERMATAN_SUL    | 16  | -0.3389 | -0.8955 | 0.6096 | 0.653182 | 1 | 13771 | tags=38%, list=2. |
| GO_TOXIN  | GO_TOXIN_METABO    | 15  | -0.3336 | -0.9022 | 0.6099 | 0.646664 | 1 | 14838 | tags=33%, list=2. |
| GO_POSIT' | GO_POSITIVE_REGUI  | 38  | -0.2703 | -0.8971 | 0.6107 | 0.652016 | 1 | 15095 | tags=34%, list=2  |
| GO_PERICE | GO_PERICENTRIOLA   | 21  | -0.3371 | -0.8782 | 0.611  | 0.672092 | 1 | 14756 | tags=43%, list=2. |
| GO_REGUL  | GO_REGULATION_OI   | 42  | -0.2657 | -0.9068 | 0.6115 | 0.639894 | 1 | 12745 | tags=33%, list=2. |
| GO_DNA_D  | GO_DNA_DOUBLE_S'   | 24  | -0.328  | -0.8771 | 0.6118 | 0.672821 | 1 | 11005 | tags=33%, list=1' |
| GO_POSIT' | GO_POSITIVE_REGUI  | 50  | -0.2607 | -0.8766 | 0.6126 | 0.673484 | 1 | 3729  | tags=14%, list=6  |
| GO_VESICI | GO_VESICLE_TARGE   | 73  | -0.265  | -0.8835 | 0.6133 | 0.666317 | 1 | 15552 | tags=37%, list=2  |
| GO_PYRUV  | GO_PYRUVATE_MET    | 148 | -0.2373 | -0.8753 | 0.6142 | 0.673805 | 1 | 9901  | tags=24%, list=1' |
| GO_GROOM  | GO_GROOMING_BEH    | 19  | -0.3148 | -0.887  | 0.6143 | 0.661153 | 1 | 7522  | tags=32%, list=1. |
| GO_DESMC  | GO_DESMOSOME       | 25  | -0.3226 | -0.8351 | 0.6147 | 0.717707 | 1 | 5139  | tags=16%, list=9  |
| GO_POSIT' | GO_POSITIVE_REGUI  | 18  | -0.3437 | -0.8557 | 0.6148 | 0.69268  | 1 | 12664 | tags=44%, list=2  |
| GO_PHOSPI | GO_PHOSPHOLIPASE   | 103 | -0.2506 | -0.8892 | 0.6148 | 0.659355 | 1 | 18325 | tags=46%, list=3  |
| GO_ESTAB  | GO_ESTABLISHMEN    | 52  | -0.2562 | -0.8694 | 0.6151 | 0.680204 | 1 | 18948 | tags=40%, list=3  |
| GO_DNA_R  | GO_DNA_REPAIR_CC   | 38  | -0.2873 | -0.8574 | 0.6155 | 0.69156  | 1 | 10439 | tags=24%, list=1  |
| GO_REGUL  | GO_REGULATION_OI   | 37  | -0.2756 | -0.8888 | 0.6175 | 0.659968 | 1 | 4975  | tags=22%, list=9  |
| GO_MICRO  | GO_MICROBODY       | 130 | -0.2304 | -0.8589 | 0.6218 | 0.690587 | 1 | 11448 | tags=28%, list=2  |
| GO_PROTEI | GO_PROTEIN_ACTIV.  | 28  | -0.3312 | -0.8677 | 0.6218 | 0.681265 | 1 | 9751  | tags=29%, list=1' |
| GO_COPII  | (GO_COPII_COATED_) | 72  | -0.2556 | -0.8727 | 0.6225 | 0.676992 | 1 | 15552 | tags=35%, list=2  |
| GO_ATPASI | GO_ATPASE_ACTIVIT' | 407 | -0.2343 | -0.8411 | 0.6228 | 0.710295 | 1 | 11510 | tags=28%, list=2  |
| GO_UBIQU  | GO_UBIQUITIN_PRO   | 18  | -0.3101 | -0.8713 | 0.6233 | 0.678153 | 1 | 7307  | tags=28%, list=1  |
| GO_REGUL  | GO_REGULATION_OI   | 17  | -0.3194 | -0.8773 | 0.624  | 0.673093 | 1 | 12320 | tags=41%, list=2  |
| GO_VITAM  | GO_VITAMIN_D_REC   | 15  | -0.3624 | -0.8759 | 0.6245 | 0.674231 | 1 | 11914 | tags=33%, list=2  |
| GO_REGUL  | GO_REGULATION_OI   | 36  | -0.2762 | -0.8677 | 0.6245 | 0.681673 | 1 | 2086  | tags=14%, list=4  |
| GO_MYOTU  | GO_MYOTUBE_CELL    | 31  | -0.2801 | -0.8696 | 0.625  | 0.680054 | 1 | 5030  | tags=19%, list=9  |
| GO_REGUL  | GO_REGULATION_OI   | 23  | -0.3053 | -0.8507 | 0.6252 | 0.698492 | 1 | 8088  | tags=26%, list=1. |
| GO_TRANS  | GO_TRANSCRIPTION   | 61  | -0.2744 | -0.868  | 0.6257 | 0.681749 | 1 | 13219 | tags=30%, list=2  |
| GO_NEGAT  | GO_NEGATIVE_REGU   | 57  | -0.2502 | -0.9119 | 0.626  | 0.635219 | 1 | 8089  | tags=23%, list=1. |
| GO_STERO  | GO_STEROID_HYDR    | 38  | -0.2724 | -0.8915 | 0.6262 | 0.656219 | 1 | 16530 | tags=34%, list=2  |
| GO_PEPTID | GO_PEPTIDYL_AS     | 31  | -0.2731 | -0.8369 | 0.6263 | 0.715678 | 1 | 12796 | tags=32%, list=2  |
| GO_MRNA_  | GO_MRNA_3_END_PI   | 96  | -0.2755 | -0.8322 | 0.6264 | 0.720932 | 1 | 7870  | tags=22%, list=1. |
| GO_MITOC  | GO_MITOCHONDRIA    | 24  | -0.2953 | -0.8685 | 0.627  | 0.681464 | 1 | 1656  | tags=17%, list=3  |
| GO_DNA_D  | GO_DNA_DEALKYLA    | 33  | -0.2739 | -0.8758 | 0.6272 | 0.674116 | 1 | 943   | tags=12%, list=2  |
| GO_LIGASE | GO_LIGASE_ACTIVIT  | 22  | -0.3252 | -0.8455 | 0.6274 | 0.70416  | 1 | 15754 | tags=41%, list=2  |
| GO_NEGAT  | GO_NEGATIVE_REGU   | 77  | -0.2417 | -0.8631 | 0.6286 | 0.685715 | 1 | 10490 | tags=29%, list=1  |
| GO_RNA_D  | GO_RNA_DEPENDEN    | 68  | -0.2613 | -0.8153 | 0.6286 | 0.740379 | 1 | 6594  | tags=19%, list=1  |
| GO_RETIN  | GO_RETINOL_META    | 47  | -0.2551 | -0.868  | 0.6292 | 0.681564 | 1 | 15748 | tags=32%, list=2  |
| GO_OLIGO  | GO_OLIGODENDROC    | 47  | -0.2458 | -0.8899 | 0.6294 | 0.658711 | 1 | 9077  | tags=21%, list=1. |
| GO_REGUL  | GO_REGULATION_OI   | 184 | -0.2405 | -0.8424 | 0.6297 | 0.70842  | 1 | 16983 | tags=36%, list=2  |
| GO_POSIT' | GO_POSITIVE_REGUI  | 26  | -0.2832 | -0.8558 | 0.6298 | 0.692817 | 1 | 11005 | tags=31%, list=1' |
| GO_CLATH  | GO_CLATHRIN_ADA    | 24  | -0.2885 | -0.8653 | 0.6317 | 0.683321 | 1 | 11018 | tags=29%, list=1' |
| GO_CARBO  | GO_CARBON_OXYGE    | 66  | -0.2545 | -0.8773 | 0.6337 | 0.672926 | 1 | 9927  | tags=21%, list=1' |
| GO_ESTAB  | GO_ESTABLISHMEN    | 198 | -0.2503 | -0.8136 | 0.6351 | 0.742961 | 1 | 10044 | tags=24%, list=1' |
| GO_POSTS' | GO_POSTSYNAPTIC_   | 16  | -0.3188 | -0.8814 | 0.6357 | 0.668119 | 1 | 28358 | tags=69%, list=4' |
| GO_INTRA  | GO_INTRACELLULAF   | 24  | -0.2786 | -0.8708 | 0.6358 | 0.678829 | 1 | 11233 | tags=25%, list=1' |
| GO_PROTEI | GO_PROTEIN_LOCAL   | 33  | -0.2994 | -0.8354 | 0.6364 | 0.71749  | 1 | 27350 | tags=67%, list=4' |
| GO_ACROS  | GO_ACROSOME_REA    | 38  | -0.2728 | -0.8861 | 0.6365 | 0.662154 | 1 | 19501 | tags=58%, list=3  |

|           |                   |     |         |         |        |          |   |       |                  |
|-----------|-------------------|-----|---------|---------|--------|----------|---|-------|------------------|
| GO_RESPON | GO_RESPONSE_TO_L  | 97  | -0.23   | -0.8384 | 0.6387 | 0.713914 | 1 | 11709 | tags=31%, list=2 |
| GO_RETIN  | GO_RETINOL_DEHYD  | 20  | -0.3089 | -0.8664 | 0.6389 | 0.681821 | 1 | 21629 | tags=55%, list=3 |
| GO_REGUL  | GO_REGULATION_OF  | 15  | -0.3133 | -0.8283 | 0.6392 | 0.723541 | 1 | 3308  | tags=20%, list=6 |
| GO_GOLGI  | GO_GOLGI_CISTERNA | 115 | -0.2224 | -0.888  | 0.6393 | 0.660252 | 1 | 9923  | tags=22%, list=1 |
| GO_PYRO   | GO_PYROPHOSPHATE  | 30  | -0.2876 | -0.8525 | 0.6394 | 0.696823 | 1 | 12270 | tags=33%, list=2 |
| GO_REGUL  | GO_REGULATION_OF  | 80  | -0.2768 | -0.8111 | 0.6397 | 0.746196 | 1 | 18666 | tags=41%, list=3 |
| GO_POLYP  | GO_POLYPEPTIDE_N  | 18  | -0.3079 | -0.8544 | 0.6399 | 0.694127 | 1 | 17072 | tags=44%, list=2 |
| GO_BRANC  | GO_BRANCHED_CHAIN | 25  | -0.2968 | -0.8505 | 0.6402 | 0.698383 | 1 | 12830 | tags=32%, list=2 |
| GO_REGUL  | GO_REGULATION_OF  | 19  | -0.3261 | -0.8704 | 0.6408 | 0.679281 | 1 | 24735 | tags=47%, list=4 |
| GO_WOUN   | GO_WOUND_HEALING  | 18  | -0.3258 | -0.8569 | 0.6409 | 0.691665 | 1 | 4213  | tags=22%, list=7 |
| GO_NEGAT  | GO_NEGATIVE_REGUL | 61  | -0.2479 | -0.8828 | 0.6416 | 0.666416 | 1 | 13913 | tags=30%, list=2 |
| GO_TRANS  | GO_TRANSLATION_I  | 32  | -0.2915 | -0.8587 | 0.6419 | 0.690126 | 1 | 6272  | tags=22%, list=1 |
| GO_REGUL  | GO_REGULATION_OF  | 23  | -0.3085 | -0.8481 | 0.642  | 0.701452 | 1 | 6438  | tags=26%, list=1 |
| GO_RNA_S  | GO_RNA_SPLICING   | 471 | -0.2377 | -0.8295 | 0.6423 | 0.722851 | 1 | 12984 | tags=27%, list=2 |
| GO_RNA_P  | GO_RNA_POLYMERAS  | 159 | -0.2423 | -0.8521 | 0.6424 | 0.697325 | 1 | 12664 | tags=30%, list=2 |
| GO_RECEP  | GO_RECEPTOR_ANTIB | 32  | -0.2781 | -0.8606 | 0.6433 | 0.688722 | 1 | 12885 | tags=34%, list=2 |
| GO_ACYLG  | GO_ACYLGLYCEROL   | 38  | -0.2814 | -0.8576 | 0.6433 | 0.691631 | 1 | 16012 | tags=42%, list=2 |
| GO_PIGME  | GO_PIGMENT_CELL   | 35  | -0.2839 | -0.8674 | 0.644  | 0.681418 | 1 | 13068 | tags=34%, list=2 |
| GO_UDP_G  | GO_UDP_GLYCOSYL   | 136 | -0.2211 | -0.8884 | 0.644  | 0.65978  | 1 | 13687 | tags=29%, list=2 |
| GO_G_PRO  | GO_G_PROTEIN_COU  | 18  | -0.3053 | -0.8714 | 0.6441 | 0.678241 | 1 | 14538 | tags=50%, list=2 |
| GO_POSIT  | GO_POSITIVE_REGUL | 26  | -0.3115 | -0.8285 | 0.6453 | 0.723472 | 1 | 9845  | tags=31%, list=1 |
| GO_REGUL  | GO_REGULATION_OF  | 19  | -0.3271 | -0.8184 | 0.6456 | 0.736655 | 1 | 5865  | tags=26%, list=1 |
| GO_MRNA   | GO_MRNA_EXPORT    | 111 | -0.282  | -0.8297 | 0.6464 | 0.723076 | 1 | 12883 | tags=28%, list=2 |
| GO_ORGAN  | GO_ORGANIC_CATIC  | 24  | -0.2841 | -0.8619 | 0.6472 | 0.687498 | 1 | 4341  | tags=21%, list=7 |
| GO_BARBE  | GO_BARBED_END_A   | 21  | -0.2874 | -0.8492 | 0.6475 | 0.70004  | 1 | 12556 | tags=33%, list=2 |
| GO_MOLTI  | GO_MOLTING_CYCL   | 110 | -0.2502 | -0.8727 | 0.6485 | 0.676808 | 1 | 8635  | tags=21%, list=1 |
| GO_RELAX  | GO_RELAXATION_OF  | 16  | -0.3403 | -0.8599 | 0.6491 | 0.689423 | 1 | 16241 | tags=56%, list=2 |
| GO_POSIT  | GO_POSITIVE_REGUL | 48  | -0.2608 | -0.8456 | 0.6492 | 0.704299 | 1 | 6874  | tags=21%, list=1 |
| GO_NUCLE  | GO_NUCLEOBASE_C   | 256 | -0.2394 | -0.8248 | 0.6497 | 0.727659 | 1 | 9700  | tags=24%, list=1 |
| GO_INNER  | GO_INNERVATION    | 26  | -0.2967 | -0.8467 | 0.6498 | 0.703146 | 1 | 20398 | tags=54%, list=3 |
| GO_HISTO  | GO_HISTONE_DEUBI  | 22  | -0.3011 | -0.8252 | 0.6503 | 0.727605 | 1 | 11768 | tags=32%, list=2 |
| GO_PEPTID | GO_PEPTIDYL_L_CY  | 23  | -0.2802 | -0.8322 | 0.651  | 0.721383 | 1 | 7566  | tags=22%, list=1 |
| GO_PROTE  | GO_PROTEIN_SERINI | 38  | -0.2772 | -0.8512 | 0.6515 | 0.698277 | 1 | 8409  | tags=24%, list=1 |
| GO_CHONI  | GO_CHONDROITIN_S  | 26  | -0.3092 | -0.8277 | 0.652  | 0.724292 | 1 | 19019 | tags=46%, list=3 |
| GO_AOPT   | GO_APOPTOTIC_DNA  | 25  | -0.2814 | -0.8556 | 0.6525 | 0.692446 | 1 | 23801 | tags=48%, list=4 |
| GO_DENDR  | GO_DENDRITIC_SPIN | 20  | -0.2916 | -0.8724 | 0.6526 | 0.676818 | 1 | 11239 | tags=35%, list=1 |
| GO_PROTE  | GO_PROTEIN_PHOSP  | 31  | -0.278  | -0.842  | 0.654  | 0.708912 | 1 | 9654  | tags=29%, list=1 |
| GO_FMN_B  | GO_FMN_BINDING    | 16  | -0.3064 | -0.8615 | 0.6552 | 0.687903 | 1 | 12725 | tags=31%, list=2 |
| GO_POSIT  | GO_POSITIVE_REGUL | 17  | -0.3143 | -0.8602 | 0.6555 | 0.6892   | 1 | 6594  | tags=29%, list=1 |
| GO_HISTO  | GO_HISTONE_H3_K9  | 16  | -0.3225 | -0.8315 | 0.6566 | 0.720661 | 1 | 15348 | tags=50%, list=2 |
| GO_FLEMM  | GO_FLEMMING_BOD   | 31  | -0.2842 | -0.8318 | 0.6575 | 0.720652 | 1 | 11768 | tags=26%, list=2 |
| GO_REGUL  | GO_REGULATION_OF  | 48  | -0.2506 | -0.8573 | 0.6577 | 0.691507 | 1 | 4975  | tags=19%, list=9 |
| GO_TRANS  | GO_TRANSCRIPTION  | 47  | -0.2714 | -0.8251 | 0.6586 | 0.727387 | 1 | 13069 | tags=34%, list=2 |
| GO_CAME   | GO_CAMERA_TYPE    | 26  | -0.2743 | -0.8677 | 0.6587 | 0.681426 | 1 | 782   | tags=12%, list=1 |
| GO_CALMC  | GO_CALMODULIN_D   | 28  | -0.2674 | -0.8672 | 0.6588 | 0.681526 | 1 | 12445 | tags=32%, list=2 |
| GO_AMINO  | GO_AMINO_ACID_BE  | 17  | -0.3064 | -0.823  | 0.659  | 0.729028 | 1 | 1186  | tags=12%, list=2 |
| GO_ESTRO  | GO_ESTROUS_CYCLI  | 15  | -0.3143 | -0.8666 | 0.659  | 0.681725 | 1 | 694   | tags=13%, list=1 |
| GO_PRODU  | GO_PRODUCTION_OF  | 51  | -0.2783 | -0.8488 | 0.659  | 0.700487 | 1 | 5902  | tags=20%, list=1 |
| GO_TRANS  | GO_TRANSMEMBRAL   | 17  | -0.2968 | -0.8351 | 0.66   | 0.717439 | 1 | 13713 | tags=41%, list=2 |
| GO_FILOP  | GO_FILOPODIUM     | 101 | -0.2363 | -0.864  | 0.6603 | 0.684524 | 1 | 11800 | tags=33%, list=2 |
| GO_REGUL  | GO_REGULATION_OF  | 34  | -0.2763 | -0.8804 | 0.6612 | 0.66925  | 1 | 15095 | tags=44%, list=2 |
| GO_DNA_C  | GO_DNA_CATABOLIC  | 32  | -0.2683 | -0.8588 | 0.6621 | 0.690327 | 1 | 23801 | tags=44%, list=4 |
| GO_PROTE  | GO_PROTEIN_KINAS  | 27  | -0.2743 | -0.8755 | 0.6623 | 0.674073 | 1 | 15209 | tags=41%, list=2 |
| GO_LIGAN  | GO_LIGAND_GATED   | 108 | -0.2406 | -0.861  | 0.6626 | 0.688287 | 1 | 20230 | tags=43%, list=3 |
| GO_POSIT  | GO_POSITIVE_REGUL | 18  | -0.3107 | -0.8319 | 0.6634 | 0.721134 | 1 | 8835  | tags=33%, list=1 |
| GO_RNA_E  | GO_RNA_EXPORT_F   | 142 | -0.2671 | -0.7954 | 0.6641 | 0.765972 | 1 | 12883 | tags=27%, list=2 |
| GO_PHOSP  | GO_PHOSPHOTRANS   | 18  | -0.2962 | -0.8263 | 0.6646 | 0.726127 | 1 | 17839 | tags=44%, list=3 |
| GO_CYTOP  | GO_CYTOPLASMIC_S  | 23  | -0.2736 | -0.8466 | 0.6648 | 0.702734 | 1 | 15888 | tags=48%, list=2 |

|            |                    |     |         |         |        |          |   |       |                  |
|------------|--------------------|-----|---------|---------|--------|----------|---|-------|------------------|
| GO_COLLA   | GO_COLLAGEN_BINI   | 68  | -0.2957 | -0.8174 | 0.6653 | 0.737445 | 1 | 17625 | tags=51%, list=3 |
| GO_ATTAC   | GO_ATTACHMENT_C    | 30  | -0.3093 | -0.7656 | 0.668  | 0.800695 | 1 | 22531 | tags=53%, list=3 |
| GO_REGUL   | GO_REGULATION_OI   | 44  | -0.2515 | -0.8647 | 0.668  | 0.683683 | 1 | 10468 | tags=25%, list=1 |
| GO_REGUL   | GO_REGULATION_OI   | 47  | -0.2685 | -0.8611 | 0.6686 | 0.688483 | 1 | 8338  | tags=28%, list=1 |
| GO_TRANS   | GO_TRANSLATIONAL   | 190 | -0.2405 | -0.79   | 0.6687 | 0.772832 | 1 | 7176  | tags=16%, list=1 |
| GO_MEMBI   | GO_MEMBRANE_DO     | 178 | -0.2298 | -0.8044 | 0.6693 | 0.75409  | 1 | 9326  | tags=23%, list=1 |
| GO_ALKAL   | GO_ALKALI_METAL_   | 17  | -0.3129 | -0.85   | 0.6699 | 0.699046 | 1 | 12175 | tags=41%, list=2 |
| GO_POSIT   | GO_POSITIVE_REGUI  | 20  | -0.2939 | -0.851  | 0.6706 | 0.698296 | 1 | 6062  | tags=20%, list=1 |
| GO_REGUL   | GO_REGULATION_OI   | 16  | -0.3404 | -0.8425 | 0.6714 | 0.708785 | 1 | 10198 | tags=31%, list=1 |
| GO_NUCLE   | GO_NUCLEOBASE_C    | 54  | -0.2511 | -0.8596 | 0.6715 | 0.689788 | 1 | 10619 | tags=30%, list=1 |
| GO_PRESY   | GO_PRESYNAPTIC_A   | 30  | -0.2817 | -0.8237 | 0.672  | 0.728708 | 1 | 11596 | tags=37%, list=2 |
| GO_PROTE   | GO_PROTEIN_KINAS   | 36  | -0.2617 | -0.8731 | 0.6725 | 0.676571 | 1 | 16853 | tags=42%, list=2 |
| GO_MITOC   | GO_MITOCHONDRIA    | 23  | -0.2826 | -0.8366 | 0.6729 | 0.7159   | 1 | 3579  | tags=13%, list=6 |
| GO_ORGAN   | GO_ORGANELLE_FIS   | 438 | -0.219  | -0.7839 | 0.6732 | 0.780696 | 1 | 18914 | tags=37%, list=3 |
| GO_INHIB   | GO_INHIBITORY_SY   | 16  | -0.3277 | -0.8305 | 0.6754 | 0.722073 | 1 | 10943 | tags=44%, list=1 |
| GO_POSIT   | GO_POSITIVE_REGUI  | 38  | -0.2674 | -0.8373 | 0.6759 | 0.715226 | 1 | 8067  | tags=24%, list=1 |
| GO_VACUC   | GO_VACUOLAR_PRO    | 17  | -0.3088 | -0.8323 | 0.676  | 0.72159  | 1 | 12270 | tags=35%, list=2 |
| GO_HOMOI   | GO_HOMOLOGOUS_F    | 52  | -0.2563 | -0.8056 | 0.6778 | 0.753706 | 1 | 8562  | tags=21%, list=1 |
| GO_CUL4    | GO_CUL4_RING_E3_U  | 33  | -0.2693 | -0.8008 | 0.6789 | 0.759081 | 1 | 9307  | tags=24%, list=1 |
| GO_PROTO   | GO_PROTON_TRANSI   | 31  | -0.2723 | -0.8233 | 0.679  | 0.729164 | 1 | 12270 | tags=29%, list=2 |
| GO_REGUL   | GO_REGULATION_OI   | 26  | -0.2894 | -0.8466 | 0.6792 | 0.702954 | 1 | 17984 | tags=42%, list=3 |
| GO_TRANS   | GO_TRANSCRIPTION   | 46  | -0.258  | -0.8106 | 0.6801 | 0.746822 | 1 | 8088  | tags=24%, list=1 |
| GO_MECHA   | GO_MECHANORECEI    | 62  | -0.2827 | -0.8753 | 0.6824 | 0.67402  | 1 | 16442 | tags=42%, list=2 |
| GO_SPLEE   | GO_SPLEEN_DEVELC   | 34  | -0.2629 | -0.8506 | 0.6832 | 0.698395 | 1 | 5380  | tags=21%, list=9 |
| GO_ENDOR   | GO_ENDORIBONUCL    | 63  | -0.2336 | -0.8167 | 0.6842 | 0.738531 | 1 | 15983 | tags=30%, list=2 |
| GO_PROTE   | GO_PROTEIN_LOCAL   | 42  | -0.2491 | -0.8347 | 0.6848 | 0.717816 | 1 | 18948 | tags=36%, list=3 |
| GO_KINET   | GO_KINETOCHORE     | 128 | -0.2667 | -0.7559 | 0.685  | 0.810201 | 1 | 11646 | tags=27%, list=2 |
| GO_POSIT   | GO_POSITIVE_REGUI  | 19  | -0.288  | -0.8468 | 0.6857 | 0.70323  | 1 | 12506 | tags=42%, list=2 |
| GO_RIBON   | GO_RIBONUCLEOPR    | 455 | -0.229  | -0.7882 | 0.6865 | 0.775357 | 1 | 9172  | tags=20%, list=1 |
| GO_METAL   | GO_METALLOENDO     | 16  | -0.308  | -0.8043 | 0.6868 | 0.753971 | 1 | 12162 | tags=44%, list=2 |
| GO_REGUL   | GO_REGULATION_OI   | 141 | -0.2148 | -0.8479 | 0.6875 | 0.701537 | 1 | 11813 | tags=21%, list=2 |
| GO_REGUL   | GO_REGULATION_OI   | 39  | -0.273  | -0.8254 | 0.6881 | 0.727453 | 1 | 15184 | tags=31%, list=2 |
| GO_CELLU   | GO_CELLULAR_RESE   | 62  | -0.2424 | -0.867  | 0.6886 | 0.681395 | 1 | 8947  | tags=23%, list=1 |
| GO_CELLU   | GO_CELLULAR_RESE   | 15  | -0.3046 | -0.8056 | 0.6892 | 0.75343  | 1 | 20646 | tags=53%, list=3 |
| GO_DNA_C   | GO_DNA_CONFORMA    | 273 | -0.2352 | -0.7568 | 0.6892 | 0.809972 | 1 | 9177  | tags=21%, list=1 |
| GO_PROTE   | GO_PROTEIN_LIPID_I | 54  | -0.2493 | -0.8374 | 0.6902 | 0.715321 | 1 | 6746  | tags=19%, list=1 |
| GO_HISTO   | GO_HISTONE_METH    | 76  | -0.2624 | -0.7754 | 0.6911 | 0.790043 | 1 | 16569 | tags=41%, list=2 |
| GO_NUCLE   | GO_NUCLEAR_CHRO    | 251 | -0.2305 | -0.7466 | 0.6919 | 0.819849 | 1 | 17836 | tags=33%, list=3 |
| GO_LYPHO   | GO_LYMPHOID_PRO    | 20  | -0.2757 | -0.8233 | 0.6923 | 0.728879 | 1 | 5634  | tags=20%, list=1 |
| GO_MITOC   | GO_MITOCHONDRIA    | 15  | -0.3192 | -0.7662 | 0.6923 | 0.800219 | 1 | 17399 | tags=47%, list=3 |
| GO_DNA_B   | GO_DNA_BINDING_B   | 18  | -0.2959 | -0.8156 | 0.6926 | 0.740077 | 1 | 12817 | tags=33%, list=2 |
| GO_MONO    | GO_MONOOXYGENA     | 101 | -0.2239 | -0.8744 | 0.6932 | 0.674815 | 1 | 12725 | tags=23%, list=2 |
| GO_PROTE   | GO_PROTEIN_DNA_C   | 110 | -0.2398 | -0.7953 | 0.6935 | 0.765846 | 1 | 3322  | tags=13%, list=6 |
| GO_PROTE   | GO_PROTEIN_DNA_C   | 206 | -0.2374 | -0.7646 | 0.6941 | 0.801522 | 1 | 4155  | tags=14%, list=7 |
| GO_ACTIN   | GO_ACTIN_BASED_C   | 212 | -0.2231 | -0.8645 | 0.6944 | 0.683845 | 1 | 11800 | tags=29%, list=2 |
| GO_POSIT   | GO_POSITIVE_REGUI  | 30  | -0.2874 | -0.7637 | 0.6946 | 0.802434 | 1 | 7870  | tags=20%, list=1 |
| GO_DNA_P   | GO_DNA_POLYMERA    | 20  | -0.3163 | -0.7982 | 0.6946 | 0.761465 | 1 | 5902  | tags=25%, list=1 |
| GO_CEREB   | GO_CEREBRAL_COR    | 25  | -0.2911 | -0.8286 | 0.6959 | 0.723877 | 1 | 19175 | tags=56%, list=3 |
| GO_MITOT   | GO_MITOTIC_CELL_C  | 161 | -0.234  | -0.776  | 0.6969 | 0.789929 | 1 | 8824  | tags=22%, list=1 |
| GO_NCRNA   | GO_NCRNA_TRANSC    | 101 | -0.2428 | -0.7721 | 0.6969 | 0.793517 | 1 | 7201  | tags=19%, list=1 |
| GO_NEGAT   | GO_NEGATIVE_REGU   | 17  | -0.2913 | -0.841  | 0.6978 | 0.710102 | 1 | 7567  | tags=29%, list=1 |
| GO_REGUL   | GO_REGULATION_OI   | 58  | -0.252  | -0.7543 | 0.6988 | 0.810906 | 1 | 14495 | tags=36%, list=2 |
| GO_LIPID_I | GO_LIPID_DROPLET_  | 26  | -0.2544 | -0.8408 | 0.6994 | 0.710222 | 1 | 8620  | tags=23%, list=1 |
| GO_GOLGI   | GO_GOLGI_STACK     | 146 | -0.2057 | -0.8319 | 0.6994 | 0.72088  | 1 | 9923  | tags=21%, list=1 |
| GO_REGUL   | GO_REGULATION_OI   | 54  | -0.2423 | -0.8304 | 0.7002 | 0.72206  | 1 | 20646 | tags=41%, list=3 |
| GO_MICRO   | GO_MICROFILAMEN    | 29  | -0.2854 | -0.8078 | 0.7006 | 0.750576 | 1 | 11314 | tags=28%, list=1 |
| GO_MLL1    | GO_MLL1_2_COMPLI   | 29  | -0.2913 | -0.7844 | 0.7006 | 0.780356 | 1 | 10844 | tags=31%, list=1 |
| GO_RECEP   | GO_RECEPTOR_INHI   | 40  | -0.2608 | -0.845  | 0.7016 | 0.704733 | 1 | 12885 | tags=33%, list=2 |

|           |                   |     |         |         |        |          |   |       |                  |
|-----------|-------------------|-----|---------|---------|--------|----------|---|-------|------------------|
| GO_POSIT  | GO_POSITIVE_REGUL | 15  | -0.2993 | -0.829  | 0.702  | 0.723356 | 1 | 3289  | tags=13%, list=6 |
| GO_INTEG  | GO_INTEGRATOR_CC  | 25  | -0.3107 | -0.8046 | 0.7036 | 0.754299 | 1 | 15517 | tags=24%, list=2 |
| GO_BLOOD  | GO_BLOOD_COAGUL   | 18  | -0.3187 | -0.7915 | 0.7043 | 0.77092  | 1 | 9751  | tags=28%, list=1 |
| GO_CHROM  | GO_CHROMOSOME_    | 310 | -0.2215 | -0.7234 | 0.7052 | 0.842967 | 1 | 17836 | tags=33%, list=3 |
| GO_PEPTID | GO_PEPTIDYL_CYST  | 49  | -0.2285 | -0.8296 | 0.7056 | 0.72288  | 1 | 7566  | tags=18%, list=1 |
| GO_CORE_  | GO_CORE_PROMOTE   | 42  | -0.2635 | -0.8091 | 0.7061 | 0.748511 | 1 | 7201  | tags=21%, list=1 |
| GO_HAIR_  | GO_HAIR_CELL_DIFF | 43  | -0.3069 | -0.857  | 0.7068 | 0.691692 | 1 | 16442 | tags=42%, list=2 |
| GO_TOXIN_ | GO_TOXIN_TRANSPC  | 41  | -0.2448 | -0.8285 | 0.707  | 0.72374  | 1 | 10198 | tags=24%, list=1 |
| GO_SNORN  | GO_SNORNA_BINDIN  | 30  | -0.2796 | -0.7559 | 0.7086 | 0.81043  | 1 | 9146  | tags=23%, list=1 |
| GO_POSIT  | GO_POSITIVE_REGUL | 15  | -0.2889 | -0.8006 | 0.7087 | 0.758793 | 1 | 21972 | tags=60%, list=3 |
| GO_CENTR  | GO_CENTRIOLE      | 131 | -0.2445 | -0.7775 | 0.709  | 0.788949 | 1 | 6486  | tags=18%, list=1 |
| GO_PYRIM  | GO_PYRIMIDINE_RIE | 16  | -0.2826 | -0.7807 | 0.711  | 0.784504 | 1 | 8153  | tags=25%, list=1 |
| GO_CHROM  | GO_CHROMOSOME_    | 183 | -0.2539 | -0.7285 | 0.7112 | 0.837706 | 1 | 17779 | tags=38%, list=3 |
| GO_RNA_   | GO_RNA_LOCALIZA   | 231 | -0.232  | -0.7506 | 0.7115 | 0.814763 | 1 | 9014  | tags=21%, list=1 |
| GO_CONDE  | GO_CONDENSED_CH   | 111 | -0.2511 | -0.7029 | 0.7123 | 0.864922 | 1 | 11646 | tags=26%, list=2 |
| GO_ALCOH  | GO_ALCOHOL_DEHY   | 21  | -0.2925 | -0.7934 | 0.7132 | 0.768165 | 1 | 27057 | tags=67%, list=4 |
| GO_HISTO  | GO_HISTONE_H4_K1  | 21  | -0.3031 | -0.7708 | 0.7135 | 0.79477  | 1 | 16590 | tags=43%, list=2 |
| GO_PARAL  | GO_PARALLEL_FIBE  | 16  | -0.3087 | -0.8182 | 0.7137 | 0.736462 | 1 | 10254 | tags=31%, list=1 |
| GO_TRAPP_ | GO_TRAPP_COMPLE   | 15  | -0.2914 | -0.8126 | 0.7146 | 0.743974 | 1 | 4704  | tags=20%, list=8 |
| GO_PSEUD  | GO_PSEUDOURIDINE  | 18  | -0.2842 | -0.7546 | 0.7151 | 0.810818 | 1 | 4290  | tags=17%, list=7 |
| GO_ZINC_  | GO_ZINC_ION_HOME  | 38  | -0.2648 | -0.799  | 0.7154 | 0.760552 | 1 | 14248 | tags=37%, list=2 |
| GO_GOLGI  | GO_GOLGI_VESICLE  | 80  | -0.2383 | -0.8048 | 0.7154 | 0.754307 | 1 | 15552 | tags=34%, list=2 |
| GO_FERTIL | GO_FERTILIZATION  | 184 | -0.2072 | -0.8812 | 0.7156 | 0.668081 | 1 | 11099 | tags=23%, list=1 |
| GO_PHOSPI | GO_PHOSPHOLIPID_  | 44  | -0.235  | -0.833  | 0.7157 | 0.720523 | 1 | 14517 | tags=34%, list=2 |
| GO_INNER_ | GO_INNER_EAR_AU   | 34  | -0.2895 | -0.8272 | 0.7165 | 0.724834 | 1 | 16442 | tags=41%, list=2 |
| GO_NEGAT  | GO_NEGATIVE_REGU  | 26  | -0.2953 | -0.7421 | 0.7171 | 0.824528 | 1 | 5527  | tags=15%, list=9 |
| GO_REGUL  | GO_REGULATION_OF  | 29  | -0.2733 | -0.8007 | 0.7171 | 0.758906 | 1 | 10347 | tags=24%, list=1 |
| GO_CATAL  | GO_CATALYTIC_ACT  | 99  | -0.2304 | -0.7646 | 0.7173 | 0.80182  | 1 | 15754 | tags=32%, list=2 |
| GO_REGUL  | GO_REGULATION_OF  | 77  | -0.2468 | -0.7716 | 0.7176 | 0.793676 | 1 | 6594  | tags=21%, list=1 |
| GO_FILOPC | GO_FILOPODIUM_TH  | 17  | -0.2907 | -0.7994 | 0.7176 | 0.760196 | 1 | 3074  | tags=18%, list=5 |
| GO_REGUL  | GO_REGULATION_OF  | 108 | -0.237  | -0.7438 | 0.7179 | 0.823556 | 1 | 8769  | tags=21%, list=1 |
| GO_ODORA  | GO_ODORANT_BIND   | 101 | -0.2722 | -0.8582 | 0.719  | 0.690732 | 1 | 21322 | tags=35%, list=3 |
| GO_AMINO  | GO_AMINO_ACID_BI  | 55  | -0.2373 | -0.8316 | 0.7194 | 0.720812 | 1 | 10550 | tags=25%, list=1 |
| GO_REGUL  | GO_REGULATION_OF  | 94  | -0.236  | -0.8401 | 0.7197 | 0.711113 | 1 | 17322 | tags=34%, list=3 |
| GO_TRANS  | GO_TRANSFERASE_   | 70  | -0.224  | -0.8424 | 0.7202 | 0.708689 | 1 | 15562 | tags=33%, list=2 |
| GO_POSIT  | GO_POSITIVE_REGUL | 39  | -0.2631 | -0.7671 | 0.7208 | 0.799456 | 1 | 15678 | tags=41%, list=2 |
| GO_NEGAT  | GO_NEGATIVE_REGU  | 80  | -0.2554 | -0.7674 | 0.7209 | 0.799213 | 1 | 12278 | tags=26%, list=2 |
| GO_NEGAT  | GO_NEGATIVE_REGU  | 16  | -0.2857 | -0.8046 | 0.721  | 0.754029 | 1 | 5704  | tags=25%, list=1 |
| GO_CATAL  | GO_CATALYTIC_ACT  | 200 | -0.23   | -0.7597 | 0.7218 | 0.806495 | 1 | 9242  | tags=21%, list=1 |
| GO_REPLIC | GO_REPLICATION_FC | 31  | -0.2775 | -0.7522 | 0.7221 | 0.813365 | 1 | 12831 | tags=42%, list=2 |
| GO_REGUL  | GO_REGULATION_OF  | 333 | -0.2186 | -0.7615 | 0.7247 | 0.804422 | 1 | 7417  | tags=19%, list=1 |
| GO_HISTO  | GO_HISTONE_MRNA   | 22  | -0.2805 | -0.7667 | 0.7248 | 0.799718 | 1 | 14433 | tags=36%, list=2 |
| GO_HELIC  | GO_HELICASE_ACTI  | 156 | -0.2378 | -0.7363 | 0.7248 | 0.829406 | 1 | 9177  | tags=25%, list=1 |
| GO_GLUCC  | GO_GLUCCORTICO    | 19  | -0.2763 | -0.8238 | 0.726  | 0.728827 | 1 | 22074 | tags=58%, list=3 |
| GO_POLY_  | GO_POLY_A_PLUS_M  | 21  | -0.2938 | -0.8014 | 0.7271 | 0.758209 | 1 | 18666 | tags=38%, list=3 |
| GO_CARBO  | GO_CARBOHYDRATE   | 208 | -0.2007 | -0.8562 | 0.7283 | 0.692291 | 1 | 9806  | tags=20%, list=1 |
| GO_ALDO_  | GO_ALDO_KETO_REI  | 27  | -0.2573 | -0.7742 | 0.7295 | 0.7905   | 1 | 27057 | tags=63%, list=4 |
| GO_SPINDI | GO_SPINDLE_ASSEM  | 109 | -0.2314 | -0.7428 | 0.7296 | 0.824571 | 1 | 9173  | tags=18%, list=1 |
| GO_INTERM | GO_INTERMEDIATE_  | 25  | -0.2758 | -0.8041 | 0.7308 | 0.753971 | 1 | 11611 | tags=32%, list=2 |
| GO_SM_LIK | GO_SM_LIKE_PROTE  | 107 | -0.2486 | -0.7938 | 0.7318 | 0.767853 | 1 | 12984 | tags=28%, list=2 |
| GO_RACEM  | GO_RACEMASE_ANE   | 16  | -0.2686 | -0.8063 | 0.7319 | 0.752823 | 1 | 9659  | tags=25%, list=1 |
| GO_TERMII | GO_TERMINATION_C  | 35  | -0.2761 | -0.7424 | 0.7328 | 0.824354 | 1 | 7203  | tags=20%, list=1 |
| GO_MYOSI  | GO_MYOSIN_COMPL   | 57  | -0.2497 | -0.8135 | 0.7328 | 0.742842 | 1 | 14648 | tags=33%, list=2 |
| GO_PROTEI | GO_PROTEIN_LOCAL  | 21  | -0.2776 | -0.7317 | 0.7345 | 0.833871 | 1 | 17062 | tags=38%, list=2 |
| GO_GLYCE  | GO_GLYCEROLIPID_  | 74  | -0.2337 | -0.8589 | 0.7346 | 0.690316 | 1 | 10220 | tags=23%, list=1 |
| GO_PHOSPI | GO_PHOSPHATIDYLI  | 16  | -0.2971 | -0.7767 | 0.7368 | 0.789911 | 1 | 17096 | tags=38%, list=2 |
| GO_REGUL  | GO_REGULATION_OF  | 38  | -0.2542 | -0.7596 | 0.7369 | 0.806348 | 1 | 9173  | tags=26%, list=1 |
| GO_DNA_G  | GO_DNA_GEOMETRI   | 113 | -0.2476 | -0.7367 | 0.7371 | 0.829346 | 1 | 9177  | tags=21%, list=1 |

|                     |     |         |         |        |          |   |       |                  |
|---------------------|-----|---------|---------|--------|----------|---|-------|------------------|
| GO_RNA_SPLICING     | 381 | -0.2133 | -0.7177 | 0.7371 | 0.847728 | 1 | 12984 | tags=26%, list=2 |
| GO_EPITHELIAL_CELL  | 15  | -0.3071 | -0.7474 | 0.738  | 0.818864 | 1 | 16442 | tags=47%, list=2 |
| GO_PROTEIN_N_LIN    | 73  | -0.2245 | -0.761  | 0.7381 | 0.80488  | 1 | 14906 | tags=29%, list=2 |
| GO_MRNA_TRANSP      | 148 | -0.2392 | -0.7394 | 0.7383 | 0.827192 | 1 | 12883 | tags=26%, list=2 |
| GO_SPLICEOSOMAL     | 54  | -0.2572 | -0.7721 | 0.7388 | 0.793796 | 1 | 9759  | tags=26%, list=1 |
| GO_PROTEIN_LOCAL    | 57  | -0.2418 | -0.7511 | 0.7391 | 0.814761 | 1 | 15772 | tags=32%, list=2 |
| GO_TRIGLYCERIDE     | 107 | -0.2197 | -0.824  | 0.7395 | 0.728723 | 1 | 10468 | tags=20%, list=1 |
| GO_CYCLIN_DEPENDENT | 29  | -0.2445 | -0.779  | 0.7396 | 0.787098 | 1 | 19997 | tags=48%, list=3 |
| GO_CELL_DIVISION    | 58  | -0.2364 | -0.7908 | 0.7402 | 0.771737 | 1 | 11638 | tags=28%, list=2 |
| GO_H4_H2A_HISTONE   | 21  | -0.2863 | -0.7701 | 0.7402 | 0.795658 | 1 | 23608 | tags=67%, list=4 |
| GO_MITOTIC_NUCLE    | 266 | -0.2023 | -0.6795 | 0.7424 | 0.8899   | 1 | 19968 | tags=37%, list=3 |
| GO_NEGATIVE_REGUL   | 59  | -0.2476 | -0.7567 | 0.7432 | 0.809831 | 1 | 12278 | tags=27%, list=2 |
| GO_PROTEIN_HETER    | 15  | -0.2992 | -0.7826 | 0.7441 | 0.782299 | 1 | 13986 | tags=40%, list=2 |
| GO_MATURATION_O     | 25  | -0.292  | -0.7379 | 0.7441 | 0.829029 | 1 | 3054  | tags=16%, list=5 |
| GO_TRANSCRIPTION    | 405 | -0.2041 | -0.7748 | 0.7443 | 0.790476 | 1 | 13705 | tags=28%, list=2 |
| GO_RNA_3_END_PRC    | 145 | -0.2339 | -0.7272 | 0.7452 | 0.838929 | 1 | 17509 | tags=33%, list=3 |
| GO_MITOTIC_G2_DN    | 21  | -0.2728 | -0.7406 | 0.7454 | 0.825574 | 1 | 18290 | tags=48%, list=3 |
| GO_PRERIBOSOME_S    | 15  | -0.3129 | -0.7348 | 0.7457 | 0.830818 | 1 | 1885  | tags=13%, list=3 |
| GO_SINGLE_FERTILI   | 153 | -0.2089 | -0.8672 | 0.7462 | 0.681355 | 1 | 10831 | tags=23%, list=1 |
| GO_POSITIVE_REGUL   | 15  | -0.3043 | -0.7848 | 0.7465 | 0.78002  | 1 | 19965 | tags=60%, list=3 |
| GO_LIPOPROTEIN_P    | 25  | -0.2733 | -0.7856 | 0.7466 | 0.778872 | 1 | 6746  | tags=20%, list=1 |
| GO_INTRA_S_DNA_D    | 15  | -0.2882 | -0.7229 | 0.7466 | 0.842885 | 1 | 4348  | tags=20%, list=7 |
| GO_PROTEIN_TRANS    | 35  | -0.2461 | -0.7554 | 0.7475 | 0.810417 | 1 | 10643 | tags=26%, list=1 |
| GO_NUCLEOBASE_B     | 18  | -0.3069 | -0.7418 | 0.7485 | 0.824684 | 1 | 13876 | tags=39%, list=2 |
| GO_REGULATION_OF    | 15  | -0.3013 | -0.8054 | 0.751  | 0.753495 | 1 | 16390 | tags=47%, list=2 |
| GO_PROTEIN_PHOSP    | 15  | -0.2733 | -0.7785 | 0.7516 | 0.787661 | 1 | 17654 | tags=47%, list=3 |
| GO_MITOTIC_SPIND    | 61  | -0.2436 | -0.7066 | 0.752  | 0.860761 | 1 | 8019  | tags=16%, list=1 |
| GO_U5_SNRNP         | 22  | -0.3009 | -0.7765 | 0.752  | 0.789889 | 1 | 8662  | tags=27%, list=1 |
| GO_ARACHIDONIC_A    | 16  | -0.3015 | -0.7581 | 0.7524 | 0.808446 | 1 | 16530 | tags=44%, list=2 |
| GO_ACID_THIOL_LIC   | 30  | -0.2397 | -0.7764 | 0.7529 | 0.789535 | 1 | 2881  | tags=10%, list=5 |
| GO_CHONDROCYTE      | 17  | -0.2833 | -0.7661 | 0.7531 | 0.800093 | 1 | 9810  | tags=24%, list=1 |
| GO_OLIGOSACCHAR     | 21  | -0.272  | -0.7243 | 0.7535 | 0.842258 | 1 | 15915 | tags=33%, list=2 |
| GO_VESICLE_DOCKI    | 44  | -0.2388 | -0.7835 | 0.7553 | 0.781019 | 1 | 17970 | tags=45%, list=3 |
| GO_NUCLEAR_EXPO     | 202 | -0.2227 | -0.7257 | 0.7558 | 0.840922 | 1 | 10044 | tags=23%, list=1 |
| GO_DNA_SECONDAR     | 33  | -0.2632 | -0.7181 | 0.7564 | 0.847858 | 1 | 12831 | tags=36%, list=2 |
| GO_GDP DISSOCIATI   | 16  | -0.2842 | -0.7549 | 0.7571 | 0.810605 | 1 | 4769  | tags=19%, list=8 |
| GO_METHYLTRANSF     | 102 | -0.2372 | -0.722  | 0.7578 | 0.843609 | 1 | 16569 | tags=39%, list=2 |
| GO_RESPONSE_TO_A    | 47  | -0.2382 | -0.8105 | 0.7578 | 0.746619 | 1 | 7789  | tags=19%, list=1 |
| GO_OUTER MITOCH     | 21  | -0.2878 | -0.7363 | 0.7612 | 0.82971  | 1 | 17033 | tags=38%, list=2 |
| GO_LONG_CHAIN_FA    | 73  | -0.2232 | -0.8322 | 0.7621 | 0.721138 | 1 | 16156 | tags=33%, list=2 |
| GO_MONOCARBOXY      | 59  | -0.229  | -0.8518 | 0.7626 | 0.697491 | 1 | 7107  | tags=19%, list=1 |
| GO_POSITIVE_REGUL   | 23  | -0.2664 | -0.7639 | 0.7646 | 0.802295 | 1 | 2644  | tags=13%, list=5 |
| GO_PROTEIN_QUALI    | 28  | -0.2494 | -0.7743 | 0.7648 | 0.791018 | 1 | 15109 | tags=32%, list=2 |
| GO_NURD_COMPLEX     | 15  | -0.302  | -0.7158 | 0.7648 | 0.848916 | 1 | 6622  | tags=27%, list=1 |
| GO_NEGATIVE_REGUL   | 18  | -0.2624 | -0.7627 | 0.7655 | 0.803119 | 1 | 6677  | tags=17%, list=1 |
| GO_SISTER_CHROMA    | 187 | -0.2025 | -0.6275 | 0.7666 | 0.930279 | 1 | 20886 | tags=40%, list=3 |
| GO_CHROMOSOMAL      | 314 | -0.2157 | -0.6657 | 0.7669 | 0.901264 | 1 | 11713 | tags=25%, list=2 |
| GO_3_5_DNA_HELIC    | 18  | -0.2944 | -0.6902 | 0.767  | 0.879163 | 1 | 8399  | tags=22%, list=1 |
| GO_RNA_STABILIZA    | 49  | -0.2547 | -0.7369 | 0.7701 | 0.829381 | 1 | 14561 | tags=29%, list=2 |
| GO_MONOVALENT_I     | 26  | -0.2691 | -0.7947 | 0.771  | 0.766557 | 1 | 9880  | tags=35%, list=1 |
| GO_CENTROSOME_S     | 15  | -0.3016 | -0.71   | 0.7722 | 0.856371 | 1 | 23739 | tags=60%, list=4 |
| GO_FATTY_ACID_BE    | 73  | -0.2248 | -0.7651 | 0.7763 | 0.801279 | 1 | 9927  | tags=22%, list=1 |
| GO_NEGATIVE_REGUL   | 29  | -0.2445 | -0.7871 | 0.7776 | 0.776619 | 1 | 8823  | tags=21%, list=1 |
| GO_GOLGI_CIS_CIST   | 29  | -0.2461 | -0.7623 | 0.7815 | 0.80342  | 1 | 4642  | tags=10%, list=8 |
| GO_BRUSH_BORDER     | 58  | -0.2373 | -0.7931 | 0.782  | 0.768426 | 1 | 24481 | tags=52%, list=4 |
| GO_OLIGOSACCHAR     | 15  | -0.3228 | -0.7511 | 0.7822 | 0.814525 | 1 | 8442  | tags=33%, list=1 |
| GO_CYCLIN_BINDING   | 29  | -0.2427 | -0.7598 | 0.7826 | 0.806531 | 1 | 17539 | tags=41%, list=3 |
| GO_SULFATION        | 18  | -0.2676 | -0.757  | 0.7826 | 0.809858 | 1 | 14920 | tags=33%, list=2 |

|            |                    |     |         |         |        |          |   |       |                   |
|------------|--------------------|-----|---------|---------|--------|----------|---|-------|-------------------|
| GO_SPINDI  | GO_SPINDLE_POLE    | 160 | -0.2108 | -0.6868 | 0.7829 | 0.88199  | 1 | 11153 | tags=21%, list=1' |
| GO_HEMATO  | GO_HEMATOPOIETIC   | 26  | -0.2506 | -0.7782 | 0.7849 | 0.788052 | 1 | 10943 | tags=23%, list=1' |
| GO_POSITI  | GO_POSITIVE_REGUL  | 23  | -0.2442 | -0.7874 | 0.785  | 0.776419 | 1 | 21972 | tags=52%, list=3  |
| GO_NUCLEO  | GO_NUCLEOSOME_A    | 71  | -0.2437 | -0.7007 | 0.7864 | 0.866844 | 1 | 8867  | tags=21%, list=1. |
| GO_PROTEI  | GO_PROTEIN_LIPID_' | 34  | -0.2509 | -0.7634 | 0.7864 | 0.802487 | 1 | 16638 | tags=35%, list=2  |
| GO_POSITI  | GO_POSITIVE_REGUL  | 35  | -0.2398 | -0.734  | 0.7865 | 0.831357 | 1 | 17193 | tags=37%, list=2  |
| GO_REGUL   | GO_REGULATION_OI   | 33  | -0.2407 | -0.7718 | 0.7871 | 0.793607 | 1 | 8941  | tags=24%, list=1. |
| GO_REGUL   | GO_REGULATION_OI   | 23  | -0.2518 | -0.7327 | 0.7879 | 0.832773 | 1 | 9118  | tags=22%, list=1. |
| GO_PHOTO   | GO_PHOTOTRANSDU    | 34  | -0.2397 | -0.8099 | 0.7881 | 0.747361 | 1 | 2640  | tags=12%, list=5  |
| GO_SMALL   | GO_SMALL_NUCLEO    | 29  | -0.2672 | -0.7253 | 0.7885 | 0.841139 | 1 | 9800  | tags=28%, list=1' |
| GO_RESPIR  | GO_RESPIRATORY_C   | 19  | -0.2847 | -0.7001 | 0.7889 | 0.867349 | 1 | 9949  | tags=32%, list=1' |
| GO_MITOTI  | GO_MITOTIC_G2_M_'  | 29  | -0.2487 | -0.6873 | 0.7894 | 0.881714 | 1 | 18515 | tags=41%, list=3  |
| GO_REGUL   | GO_REGULATION_OI   | 16  | -0.2663 | -0.7479 | 0.7901 | 0.818758 | 1 | 10444 | tags=25%, list=1. |
| GO_DNA_M   | GO_DNA_MODIFICA'   | 116 | -0.2118 | -0.7566 | 0.7902 | 0.809572 | 1 | 16537 | tags=31%, list=2  |
| GO_RESPON  | GO_RESPONSE_TO_L   | 23  | -0.2621 | -0.7757 | 0.7905 | 0.790168 | 1 | 26232 | tags=65%, list=4. |
| GO_ACID_S  | GO_ACID_SECRETIO'  | 43  | -0.2316 | -0.8182 | 0.7918 | 0.736697 | 1 | 8032  | tags=23%, list=1. |
| GO_NEGAT   | GO_NEGATIVE_REGU   | 22  | -0.2789 | -0.6659 | 0.7923 | 0.901347 | 1 | 5527  | tags=14%, list=9  |
| GO_ER_NU   | GO_ER_NUCLEUS_SI'  | 50  | -0.227  | -0.7475 | 0.7926 | 0.818979 | 1 | 4873  | tags=16%, list=8  |
| GO_TRNA_'  | GO_TRNA_METHYLA    | 37  | -0.2495 | -0.7359 | 0.7938 | 0.829303 | 1 | 16653 | tags=38%, list=2  |
| GO_EXCIT'  | GO_EXCITATORY_EX   | 30  | -0.2592 | -0.7811 | 0.7946 | 0.784252 | 1 | 16720 | tags=47%, list=2  |
| GO_TRNA_'  | GO_TRNA_MODIFICA'  | 83  | -0.2141 | -0.7012 | 0.7951 | 0.866532 | 1 | 16653 | tags=31%, list=2  |
| GO_LIPID_' | GO_LIPID_OXIDATIO  | 110 | -0.2058 | -0.7629 | 0.7957 | 0.803076 | 1 | 13129 | tags=25%, list=2  |
| GO_PROTEI  | GO_PROTEIN_TARGE   | 22  | -0.2429 | -0.7024 | 0.7965 | 0.865296 | 1 | 15043 | tags=32%, list=2  |
| GO_REGUL   | GO_REGULATION_OI   | 28  | -0.2545 | -0.8129 | 0.7972 | 0.743658 | 1 | 20196 | tags=50%, list=3. |
| GO_REGUL   | GO_REGULATION_OI   | 17  | -0.2573 | -0.7156 | 0.7977 | 0.849013 | 1 | 9118  | tags=24%, list=1. |
| GO_G_PRO'  | GO_G_PROTEIN_COU   | 15  | -0.2938 | -0.7193 | 0.7984 | 0.846674 | 1 | 16241 | tags=27%, list=2  |
| GO_REGUL   | GO_REGULATION_OI   | 37  | -0.2337 | -0.7195 | 0.7984 | 0.846737 | 1 | 12024 | tags=27%, list=2  |
| GO_PARAS'  | GO_PARASYMPATHE    | 19  | -0.263  | -0.7697 | 0.7996 | 0.796004 | 1 | 14543 | tags=42%, list=2. |
| GO_POSITI  | GO_POSITIVE_REGUL  | 68  | -0.2121 | -0.7755 | 0.8008 | 0.79022  | 1 | 18604 | tags=35%, list=3  |
| GO_NEGAT   | GO_NEGATIVE_REGU   | 22  | -0.2728 | -0.7683 | 0.8019 | 0.797974 | 1 | 20847 | tags=36%, list=3  |
| GO_SPINDI  | GO_SPINDLE_MICRO   | 64  | -0.2303 | -0.6526 | 0.8028 | 0.910967 | 1 | 22327 | tags=39%, list=3  |
| GO_MITOC'  | GO_MITOCHONDRIA'   | 23  | -0.2606 | -0.7231 | 0.8049 | 0.842866 | 1 | 1196  | tags=13%, list=2  |
| GO_REGUL   | GO_REGULATION_OI   | 25  | -0.2522 | -0.7432 | 0.8053 | 0.824262 | 1 | 24735 | tags=48%, list=4. |
| GO_MRNA_'  | GO_MRNA_CLEAVAC    | 18  | -0.291  | -0.7195 | 0.8059 | 0.846974 | 1 | 20353 | tags=39%, list=3. |
| GO_INTERM  | GO_INTERMEMBRAN    | 41  | -0.2256 | -0.7765 | 0.8079 | 0.789701 | 1 | 10316 | tags=22%, list=1. |
| GO_POSITI  | GO_POSITIVE_REGUL  | 41  | -0.2343 | -0.7996 | 0.8083 | 0.760215 | 1 | 12950 | tags=34%, list=2  |
| GO_C21_ST  | GO_C21_STEROID_HC  | 38  | -0.2246 | -0.7819 | 0.8091 | 0.783233 | 1 | 7872  | tags=18%, list=1. |
| GO_SENSEN  | GO_SENSORY_PERCE   | 446 | -0.2223 | -0.7984 | 0.8092 | 0.761462 | 1 | 27389 | tags=47%, list=4' |
| GO_ERBB2'  | GO_ERBB2_SIGNALIN  | 31  | -0.2226 | -0.7374 | 0.8123 | 0.829449 | 1 | 19903 | tags=39%, list=3. |
| GO_REGUL   | GO_REGULATION_OI   | 46  | -0.2309 | -0.6771 | 0.8127 | 0.892191 | 1 | 7890  | tags=22%, list=1. |
| GO_NEGAT   | GO_NEGATIVE_REGU   | 31  | -0.2671 | -0.6763 | 0.8127 | 0.892801 | 1 | 7690  | tags=19%, list=1. |
| GO_SULFO'  | GO_SULFOTRANSFEI   | 52  | -0.2246 | -0.7752 | 0.8134 | 0.790017 | 1 | 15562 | tags=33%, list=2  |
| GO_LYSOP'  | GO_LYSOPHOSPHOL    | 25  | -0.2449 | -0.7511 | 0.8135 | 0.814255 | 1 | 21985 | tags=52%, list=3  |
| GO_AU_RIC  | GO_AU_RICH_ELEME   | 27  | -0.2492 | -0.7161 | 0.814  | 0.84917  | 1 | 16310 | tags=44%, list=2  |
| GO_MITOTI  | GO_MITOTIC_SPINDI  | 30  | -0.2492 | -0.6728 | 0.8151 | 0.895933 | 1 | 9173  | tags=23%, list=1. |
| GO_REGUL   | GO_REGULATION_OI   | 49  | -0.2337 | -0.7227 | 0.8152 | 0.842843 | 1 | 17322 | tags=37%, list=3  |
| GO_REGUL   | GO_REGULATION_OI   | 19  | -0.2497 | -0.7425 | 0.8193 | 0.824499 | 1 | 5730  | tags=21%, list=1' |
| GO_ZYMOG   | GO_ZYMOGEN_GRAI    | 15  | -0.2748 | -0.7374 | 0.8195 | 0.829262 | 1 | 17970 | tags=47%, list=3  |
| GO_HISTON  | GO_HISTONE_H3_DE   | 20  | -0.2547 | -0.7191 | 0.8205 | 0.846671 | 1 | 6062  | tags=20%, list=1' |
| GO_PHOSPI  | GO_PHOSPHATIDYLC   | 38  | -0.2291 | -0.7842 | 0.8209 | 0.780462 | 1 | 11054 | tags=24%, list=1' |
| GO_POSITI  | GO_POSITIVE_REGUL  | 33  | -0.2391 | -0.753  | 0.8227 | 0.812424 | 1 | 12065 | tags=30%, list=2  |
| GO_DNA_T   | GO_DNA_TEMPLATE    | 74  | -0.2168 | -0.6463 | 0.8295 | 0.916151 | 1 | 7203  | tags=16%, list=1. |
| GO_OLFAC'  | GO_OLFACTORY_REI   | 421 | -0.2231 | -0.7743 | 0.8307 | 0.790777 | 1 | 27336 | tags=47%, list=4' |
| GO_PROTEI  | GO_PROTEIN_TRANS   | 59  | -0.2103 | -0.7288 | 0.8333 | 0.837965 | 1 | 16133 | tags=31%, list=2  |
| GO_CHROM   | GO_CHROMOCENTEI    | 15  | -0.278  | -0.6715 | 0.8333 | 0.896833 | 1 | 4311  | tags=20%, list=7  |
| GO_GENER   | GO_GENERAL_TRAN    | 44  | -0.2169 | -0.671  | 0.8343 | 0.89679  | 1 | 10622 | tags=23%, list=1. |
| GO_CYTOP   | GO_CYTOPLASMIC_'   | 70  | -0.2095 | -0.7178 | 0.8353 | 0.847889 | 1 | 14125 | tags=26%, list=2. |
| GO_SULFU   | GO_SULFUR_COMPO    | 42  | -0.2325 | -0.7537 | 0.8356 | 0.811651 | 1 | 7781  | tags=19%, list=1  |

|           |                   |     |         |         |        |          |   |       |                  |
|-----------|-------------------|-----|---------|---------|--------|----------|---|-------|------------------|
| GO_DOSAG  | GO_DOSAGE_COMPE   | 17  | -0.26   | -0.6579 | 0.8369 | 0.906973 | 1 | 26262 | tags=59%, list=4 |
| GO_MRNA   | GO_MRNA_CLEAVAC   | 22  | -0.2591 | -0.6619 | 0.8376 | 0.904171 | 1 | 21770 | tags=41%, list=3 |
| GO_MAINT  | GO_MAINTENANCE_I  | 19  | -0.2574 | -0.7425 | 0.8377 | 0.824736 | 1 | 10518 | tags=21%, list=1 |
| GO_CARBO  | GO_CARBOHYDRATE   | 22  | -0.24   | -0.7277 | 0.839  | 0.838571 | 1 | 8443  | tags=23%, list=1 |
| GO_REGUL  | GO_REGULATION_OI  | 48  | -0.2222 | -0.7559 | 0.8391 | 0.809929 | 1 | 19410 | tags=38%, list=3 |
| GO_ESTRO  | GO_ESTROGEN_MET   | 32  | -0.2354 | -0.7154 | 0.8406 | 0.84891  | 1 | 11913 | tags=25%, list=2 |
| GO_BRUSH  | GO_BRUSH_BORDER   | 106 | -0.2152 | -0.7409 | 0.8437 | 0.825308 | 1 | 13050 | tags=25%, list=2 |
| GO_NEGAT  | GO_NEGATIVE_REGU  | 26  | -0.236  | -0.7338 | 0.8444 | 0.831442 | 1 | 17153 | tags=38%, list=2 |
| GO_INTRAC | GO_INTRACELLULAR  | 29  | -0.235  | -0.736  | 0.8449 | 0.829474 | 1 | 20068 | tags=41%, list=3 |
| GO_MALE   | GO_MALE_SEX_DET   | 15  | -0.2626 | -0.7234 | 0.8454 | 0.842695 | 1 | 10388 | tags=27%, list=1 |
| GO_CELLU  | GO_CELLULAR_HOR   | 132 | -0.1985 | -0.7892 | 0.8473 | 0.773952 | 1 | 15827 | tags=30%, list=2 |
| GO_RETIN  | GO_RETINAL_META   | 15  | -0.2662 | -0.703  | 0.8477 | 0.865009 | 1 | 15827 | tags=33%, list=2 |
| GO_ICOSA  | GO_ICOSANOID_REC  | 15  | -0.2629 | -0.6986 | 0.8479 | 0.868828 | 1 | 4644  | tags=20%, list=8 |
| GO_NEURC  | GO_NEUROPEPTIDE   | 30  | -0.2587 | -0.7415 | 0.8494 | 0.824718 | 1 | 18674 | tags=30%, list=3 |
| GO_PROTE  | GO_PROTEIN_LOCAL  | 74  | -0.2132 | -0.6124 | 0.8499 | 0.94118  | 1 | 10459 | tags=23%, list=1 |
| GO_QUATE  | GO_QUATERNARY_A   | 28  | -0.2421 | -0.7465 | 0.8521 | 0.819688 | 1 | 19238 | tags=43%, list=3 |
| GO_RHODC  | GO_RHODOPSIN_ME   | 29  | -0.2346 | -0.755  | 0.8528 | 0.810728 | 1 | 2042  | tags=10%, list=3 |
| GO_TBP_C  | GO_TBP_CLASS_PRO  | 26  | -0.2369 | -0.6716 | 0.8539 | 0.89707  | 1 | 10197 | tags=23%, list=1 |
| GO_TRIGL  | GO_TRIGLYCERIDE   | 41  | -0.2224 | -0.7287 | 0.856  | 0.837698 | 1 | 1653  | tags=7%, list=3% |
| GO_CHROM  | GO_CHROMOSOME_C   | 32  | -0.2226 | -0.6097 | 0.8563 | 0.942202 | 1 | 21505 | tags=34%, list=3 |
| GO_SIGNA  | GO_SIGNALING_REC  | 32  | -0.2267 | -0.6848 | 0.86   | 0.884207 | 1 | 4232  | tags=13%, list=7 |
| GO_REGUL  | GO_REGULATION_OI  | 40  | -0.2138 | -0.6899 | 0.8607 | 0.879239 | 1 | 20646 | tags=45%, list=3 |
| GO_MITOT  | GO_MITOTIC_CHROM  | 15  | -0.2567 | -0.5941 | 0.8615 | 0.951751 | 1 | 23311 | tags=40%, list=4 |
| GO_TELOM  | GO_TELOMERASE_H   | 21  | -0.2465 | -0.6357 | 0.8621 | 0.923822 | 1 | 8833  | tags=19%, list=1 |
| GO_BINDI  | GO_BINDING_OF_SPI | 43  | -0.2124 | -0.7341 | 0.8635 | 0.831462 | 1 | 24643 | tags=49%, list=4 |
| GO_VASCU  | GO_VASCULAR_END   | 63  | -0.2049 | -0.7371 | 0.8657 | 0.829383 | 1 | 18245 | tags=35%, list=3 |
| GO_RIBOS  | GO_RIBOSOMAL_LAI  | 29  | -0.2307 | -0.5912 | 0.869  | 0.95298  | 1 | 16922 | tags=34%, list=2 |
| GO_ARACH  | GO_ARACHIDONIC_A  | 20  | -0.2509 | -0.6701 | 0.8715 | 0.89749  | 1 | 16530 | tags=40%, list=2 |
| GO_STERO  | GO_STEROID_HORM   | 26  | -0.231  | -0.7241 | 0.8717 | 0.842329 | 1 | 20810 | tags=50%, list=3 |
| GO_MALE   | GO_MALE_MEIOTIC   | 45  | -0.2242 | -0.7169 | 0.8725 | 0.848349 | 1 | 9845  | tags=22%, list=1 |
| GO_STABIL | GO_STABILIZATION  | 17  | -0.2616 | -0.7159 | 0.8735 | 0.849171 | 1 | 20717 | tags=47%, list=3 |
| GO_GLYCO  | GO_GLYCOSIDE_ME   | 21  | -0.2367 | -0.6715 | 0.8753 | 0.896564 | 1 | 4812  | tags=14%, list=8 |
| GO_STRUC  | GO_STRUCTURAL_C   | 23  | -0.2436 | -0.7039 | 0.8767 | 0.864194 | 1 | 22190 | tags=43%, list=3 |
| GO_CYTOC  | GO_CYTOCHROME_C   | 33  | -0.2216 | -0.5933 | 0.8768 | 0.951919 | 1 | 11858 | tags=27%, list=2 |
| GO_MITOC  | GO_MITOCHONDRIA   | 42  | -0.2092 | -0.6114 | 0.8783 | 0.941661 | 1 | 20105 | tags=38%, list=3 |
| GO_RRNA   | GO_RRNA_CONTAIN   | 15  | -0.2478 | -0.6147 | 0.8819 | 0.939983 | 1 | 18453 | tags=47%, list=3 |
| GO_PROTE  | GO_PROTEIN_LOCAL  | 18  | -0.2349 | -0.6677 | 0.8825 | 0.899557 | 1 | 8830  | tags=22%, list=1 |
| GO_POSIT  | GO_POSITIVE_REGU  | 67  | -0.1997 | -0.6742 | 0.8838 | 0.894689 | 1 | 14975 | tags=28%, list=2 |
| GO_CELL_I | GO_CELL_DEATH_IN  | 33  | -0.2178 | -0.6986 | 0.8844 | 0.869028 | 1 | 20847 | tags=36%, list=3 |
| GO_SEQUE  | GO_SEQUESTERING   | 17  | -0.2249 | -0.6444 | 0.8845 | 0.917054 | 1 | 9653  | tags=24%, list=1 |
| GO_PROTE  | GO_PROTEIN_PHOSP  | 18  | -0.2367 | -0.6648 | 0.8948 | 0.901642 | 1 | 14849 | tags=33%, list=2 |
| GO_RESPO  | GO_RESPONSE_TO_M  | 18  | -0.2463 | -0.6792 | 0.8953 | 0.88984  | 1 | 7373  | tags=22%, list=1 |
| GO_CHAN   | GO_CHANNEL_INHIB  | 37  | -0.2078 | -0.6824 | 0.896  | 0.886525 | 1 | 6828  | tags=16%, list=1 |
| GO_INNER  | GO_INNER_EAR_REC  | 27  | -0.2482 | -0.689  | 0.8967 | 0.880158 | 1 | 18458 | tags=37%, list=3 |
| GO_ANCHC  | GO_ANCHORED_COM   | 19  | -0.24   | -0.6554 | 0.8983 | 0.908972 | 1 | 1000  | tags=11%, list=2 |
| GO_REGUL  | GO_REGULATION_OI  | 51  | -0.1976 | -0.6599 | 0.9022 | 0.905668 | 1 | 4751  | tags=12%, list=8 |
| GO_PRIMA  | GO_PRIMARY_ALCO   | 16  | -0.2345 | -0.6508 | 0.9028 | 0.912203 | 1 | 14920 | tags=31%, list=2 |
| GO_SECON  | GO_SECONDARY_ME   | 24  | -0.2239 | -0.7174 | 0.9029 | 0.847884 | 1 | 18645 | tags=42%, list=3 |
| GO_ACETY  | GO_ACETYLCHOLINI  | 16  | -0.2589 | -0.6578 | 0.9059 | 0.906748 | 1 | 14794 | tags=38%, list=2 |
| GO_CENTR  | GO_CENTROMERE_C   | 37  | -0.2011 | -0.5043 | 0.9082 | 0.986492 | 1 | 8549  | tags=16%, list=1 |
| GO_DRUG   | GO_DRUG_CATABOL   | 26  | -0.2258 | -0.6611 | 0.9091 | 0.904697 | 1 | 19093 | tags=38%, list=3 |
| GO_SYNAP  | GO_SYNAPTIC_TRAN  | 26  | -0.2207 | -0.6653 | 0.9113 | 0.901318 | 1 | 6123  | tags=15%, list=1 |
| GO_LAMEL  | GO_LAMELLIPODIUM  | 22  | -0.2184 | -0.5993 | 0.9122 | 0.949146 | 1 | 11877 | tags=27%, list=2 |
| GO_MEMBI  | GO_MEMBRANE_DIS   | 16  | -0.2349 | -0.5791 | 0.9122 | 0.960107 | 1 | 22327 | tags=38%, list=3 |
| GO_SENSO  | GO_SENSORY_PERCI  | 23  | -0.2344 | -0.6847 | 0.9153 | 0.88403  | 1 | 19156 | tags=39%, list=3 |
| GO_SKIN_I | GO_SKIN_DEVELOPM  | 420 | -0.2073 | -0.6884 | 0.9198 | 0.880567 | 1 | 16432 | tags=33%, list=2 |
| GO_POSIT  | GO_POSITIVE_REGU  | 30  | -0.1992 | -0.5249 | 0.9202 | 0.981482 | 1 | 18223 | tags=33%, list=3 |
| GO_TRANS  | GO_TRANSCRIPTION  | 36  | -0.2074 | -0.6143 | 0.921  | 0.939951 | 1 | 13219 | tags=25%, list=2 |

|           |                   |     |         |         |        |          |   |       |                   |
|-----------|-------------------|-----|---------|---------|--------|----------|---|-------|-------------------|
| GO_HEPAT  | GO_HEPATOCYTE_D   | 15  | -0.2501 | -0.6454 | 0.9229 | 0.916696 | 1 | 11335 | tags=27%, list=1' |
| GO_NEGAT  | GO_NEGATIVE_REGU  | 78  | -0.1821 | -0.6935 | 0.9258 | 0.875233 | 1 | 11813 | tags=19%, list=2' |
| GO_KERAT  | GO_KERATIN_FILAM  | 94  | -0.2793 | -0.6622 | 0.9269 | 0.904088 | 1 | 22704 | tags=55%, list=3' |
| GO_LOW_D  | GO_LOW_DENSITY_I  | 17  | -0.2323 | -0.6078 | 0.9273 | 0.94329  | 1 | 18948 | tags=35%, list=3' |
| GO_DETEC  | GO_DETECTION_OF_  | 23  | -0.2287 | -0.6537 | 0.9302 | 0.910426 | 1 | 19156 | tags=48%, list=3' |
| GO_ACETY  | GO_ACETYLCHOLINI  | 16  | -0.2457 | -0.6244 | 0.9315 | 0.932647 | 1 | 8287  | tags=25%, list=1' |
| GO_NEGAT  | GO_NEGATIVE_REGU  | 21  | -0.2104 | -0.6382 | 0.9341 | 0.922398 | 1 | 6062  | tags=10%, list=1' |
| GO_CELLU  | GO_CELLULAR_COM   | 36  | -0.1916 | -0.6423 | 0.9342 | 0.918874 | 1 | 22533 | tags=44%, list=3' |
| GO_PHOTO  | GO_PHOTORECEPTO   | 17  | -0.2153 | -0.6197 | 0.9368 | 0.936295 | 1 | 14223 | tags=24%, list=2' |
| GO_INTRIN | GO_INTRINSIC_COMI | 64  | -0.1834 | -0.6497 | 0.938  | 0.913057 | 1 | 10565 | tags=19%, list=1' |
| GO_DETEC  | GO_DETECTION_OF_  | 24  | -0.2306 | -0.6692 | 0.9382 | 0.898127 | 1 | 7971  | tags=21%, list=1' |
| GO_INO80  | GO_INO80_TYPE_COI | 25  | -0.1941 | -0.5361 | 0.94   | 0.978781 | 1 | 6344  | tags=12%, list=1' |
| GO_REGUL  | GO_REGULATION_OI  | 23  | -0.2113 | -0.6379 | 0.9409 | 0.92209  | 1 | 24735 | tags=39%, list=4' |
| GO_POSITI | GO_POSITIVE_REGUI | 54  | -0.1884 | -0.6381 | 0.9415 | 0.92225  | 1 | 18604 | tags=33%, list=3' |
| GO_FATTY  | GO_FATTY_ACID_LIC | 22  | -0.2131 | -0.6279 | 0.9472 | 0.930199 | 1 | 2881  | tags=9%, list=5%  |
| GO_EPITHE | GO_EPITHELIAL_CEL | 15  | -0.2211 | -0.6108 | 0.9519 | 0.941707 | 1 | 9937  | tags=20%, list=1' |
| GO_CELLU  | GO_CELLULAR_ALDI  | 62  | -0.1845 | -0.6589 | 0.9525 | 0.906463 | 1 | 15827 | tags=26%, list=2' |
| GO_EPIDER | GO_EPIDERMAL_CEL  | 358 | -0.2119 | -0.6589 | 0.9543 | 0.90617  | 1 | 16442 | tags=35%, list=2' |
| GO_NEGAT  | GO_NEGATIVE_REGU  | 37  | -0.1985 | -0.653  | 0.9572 | 0.910846 | 1 | 13692 | tags=27%, list=2' |
| GO_GLUCCO | GO_GLUCOSYLTRAN   | 16  | -0.2033 | -0.5618 | 0.9582 | 0.968273 | 1 | 22571 | tags=44%, list=3' |
| GO_POTAS  | GO_POTASSIUM_ION  | 16  | -0.2237 | -0.5979 | 0.9603 | 0.949764 | 1 | 20717 | tags=50%, list=3' |
| GO_GLUCCO | GO_GLUCOCORTICO   | 26  | -0.2008 | -0.6334 | 0.9608 | 0.925586 | 1 | 22074 | tags=46%, list=3' |
| GO_CATEC  | GO_CATECHOLAMIN   | 17  | -0.2117 | -0.5978 | 0.9685 | 0.94951  | 1 | 18325 | tags=35%, list=3' |
| GO_DRUG   | GO_DRUG_METABOI   | 46  | -0.1913 | -0.6519 | 0.9734 | 0.911388 | 1 | 19093 | tags=35%, list=3' |
| GO_REGUL  | GO_REGULATION_OI  | 18  | -0.2067 | -0.526  | 0.9754 | 0.981487 | 1 | 27396 | tags=61%, list=4' |
| GO_REGUL  | GO_REGULATION_OI  | 25  | -0.1915 | -0.5131 | 0.9791 | 0.984655 | 1 | 1992  | tags=8%, list=3%  |
| GO_LONG   | GO_LONG_CHAIN_FA  | 33  | -0.1714 | -0.5741 | 0.9861 | 0.96259  | 1 | 27131 | tags=52%, list=4' |
| GO_KERAT  | GO_KERATINIZATIOI | 223 | -0.2249 | -0.5738 | 0.9865 | 0.962372 | 1 | 22704 | tags=49%, list=3' |
| GO_POSITI | GO_POSITIVE_REGUI | 15  | -0.1832 | -0.4832 | 0.9867 | 0.990684 | 1 | 2375  | tags=7%, list=4%  |
| GO_INTERM | GO_INTERMEDIATE_  | 239 | -0.2558 | -0.6745 | 0.988  | 0.894575 | 1 | 19653 | tags=48%, list=3' |
| GO_SPERM  | GO_SPERM_EGG_REC  | 60  | -0.1757 | -0.6453 | 0.9885 | 0.916481 | 1 | 10826 | tags=18%, list=1' |
| GO_KERAT  | GO_KERATINOCYTE   | 301 | -0.1833 | -0.5344 | 0.9981 | 0.979031 | 1 | 16432 | tags=33%, list=2' |



5%, signal=61%  
2%, signal=67%  
3%, signal=67%  
6%, signal=55%  
2%, signal=61%  
2%, signal=64%  
5%, signal=57%  
5%, signal=59%  
2%, signal=61%  
3%, signal=81%  
3%, signal=54%  
2%, signal=62%  
7%, signal=80%  
2%, signal=57%  
2%, signal=68%  
2%, signal=39%  
6%, signal=89%  
5%, signal=47%  
2%, signal=58%  
3%, signal=78%  
1%, signal=83%  
6%, signal=50%  
3%, signal=80%  
5%, signal=54%  
%, signal=41%  
5%, signal=59%  
1%, signal=68%  
6%, signal=43%  
1%, signal=61%  
0%, signal=63%  
2%, signal=54%  
7%, signal=62%  
5%, signal=44%  
6%, signal=39%  
2%, signal=45%  
1%, signal=67%  
9%, signal=57%  
4%, signal=56%  
1%, signal=64%  
4%, signal=45%  
%, signal=46%  
1%, signal=60%  
1%, signal=63%  
2%, signal=82%  
7%, signal=52%  
2%, signal=59%  
5%, signal=47%  
6%, signal=70%  
1%, signal=63%  
5%, signal=64%  
1%, signal=83%  
1%, signal=65%  
2%, signal=93%  
2%, signal=102%  
1%, signal=93%  
6%, signal=45%  
7%, signal=46%

4%, signal=57%  
2%, signal=53%  
1%, signal=47%  
6%, signal=67%  
5%, signal=65%  
8%, signal=80%  
1%, signal=93%  
9%, signal=53%  
, signal=48%  
1%, signal=63%  
, signal=43%  
6%, signal=107%  
5%, signal=57%  
7%, signal=82%  
, signal=36%  
4%, signal=51%  
9%, signal=79%  
0%, signal=73%  
7%, signal=103%  
5%, signal=65%  
6%, signal=77%  
3%, signal=46%  
4%, signal=42%  
0%, signal=50%  
0%, signal=44%  
2%, signal=40%  
7%, signal=97%  
1%, signal=91%  
5%, signal=46%  
, signal=24%  
4%, signal=47%  
2%, signal=60%  
1%, signal=80%  
1%, signal=59%  
2%, signal=51%  
4%, signal=77%  
7%, signal=45%  
2%, signal=33%  
3%, signal=36%  
1%, signal=53%  
1%, signal=74%  
, signal=48%  
5%, signal=62%  
2%, signal=56%  
2%, signal=50%  
4%, signal=35%  
9%, signal=77%  
3%, signal=60%  
3%, signal=51%  
5%, signal=47%  
8%, signal=72%  
6%, signal=62%  
1%, signal=59%  
2%, signal=74%  
8%, signal=46%  
9%, signal=41%  
, signal=51%  
9%, signal=86%

3%, signal=40%  
9%, signal=56%  
4%, signal=61%  
3%, signal=54%  
2%, signal=53%  
9%, signal=45%  
6%, signal=66%  
9%, signal=87%  
2%, signal=51%  
9%, signal=96%  
5%, signal=45%  
2%, signal=60%  
8%, signal=56%  
8%, signal=61%  
9%, signal=52%  
7%, signal=76%  
6%, signal=73%  
5%, signal=44%  
7%, signal=63%  
1%, signal=52%  
4%, signal=43%  
4%, signal=58%  
%, signal=48%  
9%, signal=64%  
6%, signal=44%  
0%, signal=52%  
2%, signal=44%  
1%, signal=93%  
9%, signal=38%  
6%, signal=69%  
1%, signal=46%  
1%, signal=65%  
9%, signal=77%  
5%, signal=61%  
3%, signal=66%  
8%, signal=46%  
8%, signal=61%  
3%, signal=55%  
%, signal=48%  
3%, signal=64%  
3%, signal=64%  
0%, signal=81%  
0%, signal=55%  
6%, signal=82%  
2%, signal=80%  
5%, signal=57%  
9%, signal=65%  
2%, signal=54%  
%, signal=36%  
4%, signal=45%  
6%, signal=50%  
5%, signal=41%  
1%, signal=64%  
3%, signal=47%  
2%, signal=50%  
6%, signal=41%  
%, signal=46%  
1%, signal=59%

3%, signal=51%  
%, signal=41%  
%, signal=42%  
%, signal=24%  
0%, signal=65%  
6%, signal=47%  
%, signal=34%  
8%, signal=64%  
1%, signal=71%  
0%, signal=51%  
1%, signal=91%  
5%, signal=39%  
4%, signal=52%  
4%, signal=55%  
5%, signal=40%  
%, signal=23%  
9%, signal=97%  
0%, signal=52%  
5%, signal=91%  
8%, signal=87%  
7%, signal=49%  
7%, signal=59%  
9%, signal=47%  
2%, signal=56%  
1%, signal=76%  
3%, signal=36%  
5%, signal=95%  
4%, signal=39%  
1%, signal=67%  
7%, signal=68%  
3%, signal=43%  
0%, signal=44%  
7%, signal=53%  
6%, signal=68%  
5%, signal=44%  
4%, signal=46%  
%, signal=40%  
0%, signal=32%  
0%, signal=56%  
2%, signal=51%  
5%, signal=95%  
9%, signal=46%  
3%, signal=48%  
3%, signal=58%  
8%, signal=54%  
1%, signal=77%  
5%, signal=56%  
8%, signal=45%  
2%, signal=48%  
8%, signal=48%  
3%, signal=58%  
5%, signal=70%  
9%, signal=49%  
8%, signal=44%  
8%, signal=61%  
6%, signal=51%  
9%, signal=58%  
7%, signal=61%

2%, signal=36%  
5%, signal=37%  
%, signal=41%  
1%, signal=44%  
4%, signal=55%  
8%, signal=52%  
2%, signal=49%  
0%, signal=35%  
7%, signal=41%  
4%, signal=39%  
1%, signal=53%  
0%, signal=32%  
2%, signal=45%  
9%, signal=53%  
1%, signal=48%  
0%, signal=26%  
2%, signal=53%  
%, signal=28%  
5%, signal=70%  
3%, signal=44%  
0%, signal=46%  
7%, signal=55%  
6%, signal=46%  
0%, signal=31%  
3%, signal=35%  
7%, signal=59%  
6%, signal=72%  
3%, signal=55%  
7%, signal=60%  
5%, signal=56%  
9%, signal=56%  
7%, signal=72%  
9%, signal=69%  
2%, signal=47%  
7%, signal=60%  
1%, signal=99%  
3%, signal=111%  
4%, signal=70%  
4%, signal=41%  
9%, signal=46%  
9%, signal=41%  
%, signal=35%  
9%, signal=114%  
1%, signal=77%  
9%, signal=48%  
2%, signal=31%  
9%, signal=57%  
8%, signal=60%  
6%, signal=87%  
6%, signal=38%  
7%, signal=42%  
5%, signal=41%  
2%, signal=50%  
6%, signal=101%  
0%, signal=78%  
8%, signal=62%  
9%, signal=62%  
8%, signal=75%

6%, signal=61%  
1%, signal=52%  
4%, signal=112%  
4%, signal=54%  
7%, signal=66%  
6%, signal=60%  
0%, signal=74%  
6%, signal=65%  
5%, signal=56%  
, signal=30%  
9%, signal=62%  
2%, signal=52%  
2%, signal=74%  
7%, signal=70%  
5%, signal=41%  
1%, signal=50%  
, signal=34%  
5%, signal=38%  
4%, signal=40%  
1%, signal=73%  
1%, signal=49%  
9%, signal=47%  
9%, signal=63%  
2%, signal=55%  
6%, signal=41%  
5%, signal=89%  
4%, signal=53%  
7%, signal=60%  
7%, signal=74%  
4%, signal=35%  
3%, signal=58%  
0%, signal=26%  
7%, signal=55%  
2%, signal=38%  
0%, signal=64%  
4%, signal=54%  
0%, signal=45%  
0%, signal=44%  
4%, signal=51%  
4%, signal=35%  
9%, signal=75%  
, signal=37%  
7%, signal=66%  
4%, signal=33%  
5%, signal=45%  
, signal=33%  
0%, signal=82%  
0%, signal=55%  
2%, signal=49%  
4%, signal=55%  
2%, signal=112%  
7%, signal=59%  
3%, signal=72%  
1%, signal=48%  
9%, signal=55%  
7%, signal=57%  
6%, signal=42%  
0%, signal=44%

7%, signal=53%  
7%, signal=55%  
9%, signal=85%  
4%, signal=104%  
8%, signal=52%  
4%, signal=101%  
8%, signal=106%  
9%, signal=72%  
, signal=33%  
5%, signal=67%  
4%, signal=42%  
4%, signal=54%  
2%, signal=85%  
6%, signal=41%  
7%, signal=52%  
3%, signal=72%  
0%, signal=70%  
0%, signal=28%  
0%, signal=46%  
1%, signal=72%  
5%, signal=43%  
9%, signal=48%  
2%, signal=29%  
8%, signal=47%  
4%, signal=56%  
, signal=23%  
3%, signal=33%  
8%, signal=48%  
0%, signal=44%  
2%, signal=63%  
4%, signal=45%  
9%, signal=47%  
9%, signal=54%  
8%, signal=42%  
6%, signal=44%  
7%, signal=39%  
6%, signal=79%  
6%, signal=54%  
0%, signal=42%  
4%, signal=59%  
3%, signal=54%  
8%, signal=59%  
1%, signal=87%  
5%, signal=52%  
3%, signal=46%  
3%, signal=45%  
6%, signal=66%  
9%, signal=54%  
5%, signal=53%  
9%, signal=44%  
6%, signal=39%  
5%, signal=108%  
8%, signal=58%  
1%, signal=93%  
8%, signal=75%  
2%, signal=50%  
7%, signal=40%  
9%, signal=39%

7%, signal=68%  
5%, signal=60%  
2%, signal=73%  
0%, signal=28%  
9%, signal=103%  
7%, signal=73%  
8%, signal=68%  
3%, signal=35%  
, signal=36%  
5%, signal=42%  
1%, signal=74%  
1%, signal=30%  
1%, signal=42%  
2%, signal=68%  
9%, signal=46%  
2%, signal=49%  
0%, signal=51%  
7%, signal=38%  
3%, signal=50%  
, signal=28%  
1%, signal=72%  
6%, signal=62%  
1%, signal=49%  
4%, signal=58%  
8%, signal=65%  
9%, signal=61%  
8%, signal=83%  
4%, signal=55%  
9%, signal=40%  
5%, signal=66%  
4%, signal=50%  
0%, signal=47%  
0%, signal=71%  
2%, signal=57%  
6%, signal=72%  
4%, signal=56%  
9%, signal=44%  
0%, signal=30%  
8%, signal=52%  
, signal=31%  
1%, signal=45%  
8%, signal=48%  
0%, signal=43%  
4%, signal=79%  
5%, signal=74%  
2%, signal=48%  
3%, signal=87%  
0%, signal=34%  
6%, signal=38%  
7%, signal=40%  
3%, signal=76%  
1%, signal=54%  
9%, signal=36%  
3%, signal=71%  
4%, signal=32%  
5%, signal=69%  
4%, signal=95%  
4%, signal=56%



7%, signal=84%  
2%, signal=46%  
6%, signal=36%  
2%, signal=47%  
4%, signal=31%  
6%, signal=39%  
7%, signal=57%  
6%, signal=67%  
2%, signal=41%  
0%, signal=74%  
6%, signal=37%  
5%, signal=113%  
8%, signal=76%  
5%, signal=42%  
3%, signal=90%  
5%, signal=38%  
1%, signal=71%  
5%, signal=49%  
0%, signal=59%  
0%, signal=37%  
3%, signal=53%  
5%, signal=44%  
5%, signal=50%  
8%, signal=41%  
0%, signal=32%  
0%, signal=48%  
1%, signal=80%  
8%, signal=44%  
8%, signal=43%  
7%, signal=80%  
0%, signal=35%  
6%, signal=38%  
7%, signal=46%  
5%, signal=40%  
3%, signal=59%  
0%, signal=43%  
9%, signal=57%  
4%, signal=37%  
8%, signal=63%  
3%, signal=32%  
8%, signal=69%  
2%, signal=32%  
5%, signal=44%  
1%, signal=46%  
2%, signal=31%  
6%, signal=56%  
3%, signal=75%  
, signal=27%  
3%, signal=51%  
5%, signal=39%  
2%, signal=30%  
1%, signal=45%  
4%, signal=84%  
1%, signal=40%  
5%, signal=76%  
1%, signal=129%  
6%, signal=59%  
8%, signal=40%

%, signal=28%  
1%, signal=48%  
8%, signal=40%  
9%, signal=41%  
1%, signal=61%  
4%, signal=39%  
2%, signal=46%  
5%, signal=53%  
1%, signal=42%  
9%, signal=51%  
3%, signal=44%  
8%, signal=61%  
8%, signal=42%  
9%, signal=40%  
9%, signal=57%  
1%, signal=43%  
9%, signal=73%  
0%, signal=62%  
9%, signal=60%  
6%, signal=52%  
2%, signal=43%  
0%, signal=43%  
5%, signal=48%  
3%, signal=40%  
9%, signal=48%  
1%, signal=35%  
2%, signal=36%  
2%, signal=47%  
2%, signal=48%  
6%, signal=63%  
5%, signal=36%  
9%, signal=96%  
9%, signal=40%  
4%, signal=54%  
9%, signal=46%  
8%, signal=41%  
0%, signal=36%  
7%, signal=89%  
0%, signal=140%  
9%, signal=38%  
7%, signal=98%  
%, signal=27%  
8%, signal=61%  
4%, signal=33%  
%, signal=39%  
3%, signal=49%  
8%, signal=83%  
4%, signal=83%  
9%, signal=43%  
5%, signal=49%  
4%, signal=71%  
7%, signal=64%  
4%, signal=75%  
3%, signal=68%  
6%, signal=63%  
6%, signal=58%  
5%, signal=59%  
9%, signal=37%

2%, signal=61%  
0%, signal=62%  
3%, signal=33%  
9%, signal=51%  
7%, signal=52%  
2%, signal=53%  
3%, signal=42%  
6%, signal=53%  
7%, signal=37%  
8%, signal=57%  
8%, signal=77%  
3%, signal=33%  
5%, signal=63%  
4%, signal=64%  
0%, signal=42%  
0%, signal=68%  
9%, signal=50%  
9%, signal=52%  
8%, signal=64%  
2%, signal=27%  
8%, signal=55%  
8%, signal=57%  
9%, signal=43%  
1%, signal=80%  
7%, signal=40%  
2%, signal=52%  
3%, signal=37%  
5%, signal=44%  
3%, signal=42%  
%, signal=25%  
7%, signal=33%  
3%, signal=56%  
3%, signal=37%  
%, signal=21%  
7%, signal=42%  
5%, signal=85%  
1%, signal=45%  
4%, signal=80%  
%, signal=26%  
3%, signal=84%  
9%, signal=73%  
2%, signal=48%  
5%, signal=87%  
0%, signal=61%  
2%, signal=48%  
2%, signal=74%  
8%, signal=64%  
1%, signal=84%  
1%, signal=76%  
0%, signal=43%  
1%, signal=83%  
5%, signal=81%  
8%, signal=37%  
6%, signal=43%  
2%, signal=47%  
7%, signal=38%  
9%, signal=75%  
0%, signal=62%

1%, signal=78%  
6%, signal=83%  
0%, signal=66%  
7%, signal=44%  
0%, signal=42%  
6%, signal=58%  
5%, signal=75%  
1%, signal=70%  
, signal=23%  
7%, signal=63%  
0%, signal=45%  
9%, signal=51%  
7%, signal=59%  
8%, signal=69%  
0%, signal=35%  
7%, signal=36%  
0%, signal=56%  
4%, signal=72%  
8%, signal=81%  
0%, signal=60%  
9%, signal=39%  
8%, signal=52%  
6%, signal=55%  
4%, signal=116%  
7%, signal=47%  
8%, signal=52%  
3%, signal=87%  
8%, signal=61%  
3%, signal=74%  
2%, signal=46%  
9%, signal=66%  
6%, signal=54%  
4%, signal=89%  
5%, signal=39%  
4%, signal=72%  
1%, signal=75%  
6%, signal=78%  
6%, signal=67%  
9%, signal=118%  
4%, signal=50%  
0%, signal=42%  
4%, signal=68%  
9%, signal=39%  
2%, signal=39%  
9%, signal=42%  
7%, signal=73%  
, signal=44%  
1%, signal=33%  
6%, signal=47%  
5%, signal=71%  
8%, signal=95%  
4%, signal=45%  
7%, signal=99%  
5%, signal=62%  
9%, signal=78%  
5%, signal=70%  
0%, signal=41%  
1%, signal=89%

1%, signal=46%  
5%, signal=32%  
2%, signal=45%  
, signal=30%  
0%, signal=34%  
8%, signal=65%  
7%, signal=44%  
3%, signal=77%  
3%, signal=50%  
9%, signal=57%  
6%, signal=54%  
3%, signal=68%  
7%, signal=69%  
7%, signal=68%  
3%, signal=44%  
8%, signal=61%  
5%, signal=55%  
0%, signal=34%  
7%, signal=37%  
, signal=34%  
3%, signal=36%  
7%, signal=40%  
7%, signal=69%  
8%, signal=90%  
1%, signal=34%  
3%, signal=38%  
0%, signal=57%  
4%, signal=32%  
6%, signal=35%  
7%, signal=70%  
7%, signal=55%  
0%, signal=36%  
4%, signal=47%  
8%, signal=56%  
1%, signal=33%  
, signal=31%  
5%, signal=36%  
9%, signal=38%  
8%, signal=85%  
9%, signal=63%  
8%, signal=74%  
, signal=29%  
0%, signal=30%  
5%, signal=90%  
2%, signal=44%  
3%, signal=40%  
7%, signal=57%  
8%, signal=39%  
5%, signal=41%  
6%, signal=41%  
4%, signal=52%  
, signal=23%  
2%, signal=92%  
2%, signal=62%  
0%, signal=67%  
4%, signal=105%  
1%, signal=87%  
, signal=20%

%, signal=27%  
9%, signal=65%  
9%, signal=42%  
1%, signal=42%  
1%, signal=48%  
6%, signal=68%  
4%, signal=112%  
2%, signal=34%  
8%, signal=55%  
8%, signal=42%  
8%, signal=44%  
7%, signal=60%  
0%, signal=30%  
5%, signal=119%  
3%, signal=60%  
7%, signal=72%  
1%, signal=55%  
9%, signal=46%  
7%, signal=61%  
6%, signal=40%  
4%, signal=51%  
1%, signal=37%  
4%, signal=51%  
0%, signal=40%  
2%, signal=49%  
2%, signal=45%  
4%, signal=48%  
1%, signal=39%  
7%, signal=51%  
7%, signal=59%  
3%, signal=28%  
1%, signal=57%  
5%, signal=38%  
3%, signal=31%  
4%, signal=39%  
%, signal=22%  
2%, signal=81%  
6%, signal=34%  
5%, signal=37%  
1%, signal=27%  
2%, signal=30%  
5%, signal=49%  
%, signal=26%  
%, signal=28%  
5%, signal=94%  
5%, signal=59%  
0%, signal=47%  
6%, signal=29%  
7%, signal=34%  
6%, signal=48%  
3%, signal=77%  
9%, signal=47%  
1%, signal=49%  
3%, signal=55%  
4%, signal=53%  
1%, signal=42%  
4%, signal=48%  
6%, signal=40%

3%, signal=63%  
8%, signal=39%  
%, signal=28%  
3%, signal=52%  
4%, signal=40%  
5%, signal=55%  
9%, signal=51%  
4%, signal=41%  
0%, signal=49%  
7%, signal=55%  
%, signal=25%  
9%, signal=64%  
3%, signal=63%  
2%, signal=77%  
9%, signal=41%  
0%, signal=42%  
7%, signal=56%  
4%, signal=52%  
0%, signal=66%  
0%, signal=28%  
9%, signal=45%  
1%, signal=51%  
1%, signal=26%  
8%, signal=39%  
8%, signal=56%  
7%, signal=42%  
3%, signal=71%  
6%, signal=63%  
1%, signal=42%  
0%, signal=55%  
1%, signal=62%  
2%, signal=57%  
9%, signal=39%  
6%, signal=45%  
3%, signal=73%  
8%, signal=87%  
3%, signal=34%  
2%, signal=52%  
8%, signal=41%  
5%, signal=67%  
9%, signal=52%  
8%, signal=49%  
5%, signal=40%  
7%, signal=57%  
7%, signal=32%  
5%, signal=34%  
3%, signal=30%  
5%, signal=43%  
1%, signal=60%  
8%, signal=64%  
9%, signal=62%  
5%, signal=55%  
7%, signal=43%  
4%, signal=63%  
6%, signal=50%  
1%, signal=47%  
6%, signal=47%  
7%, signal=49%

2%, signal=27%  
6%, signal=57%  
6%, signal=68%  
1%, signal=52%  
0%, signal=46%  
2%, signal=89%  
8%, signal=68%  
2%, signal=44%  
2%, signal=70%  
7%, signal=55%  
2%, signal=35%  
6%, signal=68%  
, signal=34%  
5%, signal=36%  
6%, signal=36%  
4%, signal=49%  
8%, signal=39%  
9%, signal=40%  
5%, signal=103%  
5%, signal=59%  
9%, signal=77%  
5%, signal=81%  
1%, signal=66%  
2%, signal=48%  
2%, signal=33%  
2%, signal=32%  
9%, signal=46%  
7%, signal=33%  
5%, signal=35%  
1%, signal=51%  
, signal=31%  
9%, signal=61%  
5%, signal=101%  
6%, signal=78%  
3%, signal=78%  
1%, signal=85%  
0%, signal=48%  
, signal=29%  
8%, signal=42%  
3%, signal=43%  
6%, signal=59%  
6%, signal=44%  
0%, signal=39%  
0%, signal=61%  
3%, signal=56%  
6%, signal=66%  
3%, signal=34%  
3%, signal=26%  
9%, signal=39%  
, signal=18%  
7%, signal=47%  
4%, signal=72%  
4%, signal=35%  
6%, signal=90%  
9%, signal=45%  
9%, signal=51%  
0%, signal=49%  
0%, signal=39%



1%, signal=44%  
7%, signal=55%  
0%, signal=41%  
0%, signal=42%  
3%, signal=35%  
2%, signal=92%  
5%, signal=119%  
1%, signal=61%  
4%, signal=93%  
6%, signal=49%  
5%, signal=52%  
0%, signal=79%  
5%, signal=57%  
8%, signal=38%  
1%, signal=54%  
4%, signal=35%  
6%, signal=32%  
4%, signal=39%  
2%, signal=44%  
2%, signal=58%  
0%, signal=74%  
9%, signal=34%  
1%, signal=34%  
2%, signal=56%  
0%, signal=26%  
2%, signal=56%  
0%, signal=46%  
6%, signal=50%  
4%, signal=61%  
7%, signal=38%  
1%, signal=70%  
8%, signal=63%  
4%, signal=39%  
6%, signal=81%  
2%, signal=44%  
0%, signal=47%  
3%, signal=23%  
6%, signal=40%  
0%, signal=40%  
9%, signal=41%  
%, signal=31%  
5%, signal=78%  
1%, signal=28%  
3%, signal=73%  
5%, signal=55%  
6%, signal=52%  
1%, signal=26%  
6%, signal=34%  
2%, signal=44%  
1%, signal=27%  
1%, signal=52%  
7%, signal=39%  
3%, signal=37%  
7%, signal=38%  
9%, signal=41%  
1%, signal=53%  
5%, signal=89%  
0%, signal=42%

2%, signal=41%  
5%, signal=50%  
9%, signal=36%  
9%, signal=53%  
6%, signal=41%  
5%, signal=32%  
, signal=32%  
7%, signal=38%  
4%, signal=31%  
9%, signal=55%  
6%, signal=55%  
, signal=29%  
0%, signal=40%  
1%, signal=52%  
7%, signal=57%  
4%, signal=58%  
1%, signal=30%  
4%, signal=59%  
4%, signal=48%  
, signal=28%  
9%, signal=83%  
3%, signal=65%  
8%, signal=46%  
2%, signal=56%  
0%, signal=56%  
9%, signal=48%  
0%, signal=74%  
4%, signal=38%  
6%, signal=63%  
6%, signal=72%  
, signal=32%  
5%, signal=66%  
7%, signal=37%  
4%, signal=44%  
0%, signal=28%  
6%, signal=49%  
1%, signal=55%  
8%, signal=37%  
2%, signal=47%  
5%, signal=29%  
0%, signal=26%  
4%, signal=80%  
5%, signal=36%  
1%, signal=74%  
0%, signal=40%  
7%, signal=38%  
5%, signal=47%  
9%, signal=44%  
2%, signal=59%  
4%, signal=44%  
0%, signal=44%  
4%, signal=68%  
1%, signal=44%  
2%, signal=49%  
, signal=26%  
3%, signal=40%  
4%, signal=97%  
6%, signal=63%

9%, signal=34%  
7%, signal=43%  
6%, signal=53%  
, signal=24%  
7%, signal=50%  
2%, signal=28%  
6%, signal=40%  
7%, signal=37%  
5%, signal=51%  
4%, signal=31%  
1%, signal=43%  
2%, signal=83%  
6%, signal=42%  
6%, signal=58%  
3%, signal=45%  
1%, signal=57%  
9%, signal=42%  
3%, signal=43%  
, signal=21%  
6%, signal=53%  
4%, signal=90%  
2%, signal=32%  
5%, signal=52%  
0%, signal=68%  
3%, signal=79%  
7%, signal=31%  
9%, signal=84%  
3%, signal=46%  
2%, signal=50%  
4%, signal=77%  
8%, signal=52%  
8%, signal=60%  
1%, signal=65%  
2%, signal=32%  
, signal=37%  
, signal=20%  
4%, signal=33%  
3%, signal=59%  
0%, signal=55%  
6%, signal=36%  
2%, signal=27%  
, signal=35%  
2%, signal=43%  
0%, signal=44%  
9%, signal=39%  
5%, signal=47%  
6%, signal=43%  
8%, signal=50%  
, signal=20%  
1%, signal=47%  
3%, signal=54%  
5%, signal=56%  
9%, signal=50%  
2%, signal=44%  
9%, signal=36%  
5%, signal=61%  
6%, signal=58%  
0%, signal=39%

2%, signal=58%  
6%, signal=57%  
0%, signal=38%  
2%, signal=87%  
8%, signal=40%  
0%, signal=31%  
6%, signal=47%  
1%, signal=35%  
, signal=23%  
8%, signal=57%  
1%, signal=43%  
3%, signal=42%  
, signal=26%  
2%, signal=30%  
7%, signal=79%  
2%, signal=49%  
, signal=23%  
0%, signal=47%  
3%, signal=39%  
9%, signal=45%  
6%, signal=76%  
8%, signal=36%  
1%, signal=43%  
3%, signal=46%  
5%, signal=75%  
4%, signal=83%  
5%, signal=46%  
1%, signal=159%  
8%, signal=40%  
2%, signal=134%  
0%, signal=43%  
4%, signal=83%  
4%, signal=37%  
, signal=34%  
3%, signal=94%  
7%, signal=60%  
3%, signal=51%  
2%, signal=40%  
7%, signal=38%  
3%, signal=47%  
8%, signal=46%  
3%, signal=102%  
3%, signal=40%  
7%, signal=36%  
, signal=27%  
, signal=27%  
5%, signal=51%  
2%, signal=51%  
1%, signal=36%  
6%, signal=58%  
7%, signal=42%  
0%, signal=55%  
, signal=24%  
3%, signal=29%  
5%, signal=52%  
0%, signal=37%  
4%, signal=48%  
5%, signal=36%

4%, signal=35%  
3%, signal=62%  
%, signal=24%  
4%, signal=34%  
%, signal=34%  
7%, signal=54%  
%, signal=19%  
7%, signal=38%  
1%, signal=76%  
2%, signal=43%  
7%, signal=31%  
7%, signal=52%  
8%, signal=39%  
5%, signal=59%  
4%, signal=85%  
0%, signal=60%  
8%, signal=105%  
8%, signal=49%  
4%, signal=48%  
%, signal=20%  
4%, signal=38%  
1%, signal=30%  
%, signal=24%  
%, signal=24%  
4%, signal=50%  
%, signal=31%  
1%, signal=34%  
8%, signal=51%  
5%, signal=80%  
8%, signal=41%  
5%, signal=47%  
3%, signal=42%  
5%, signal=60%  
9%, signal=36%  
4%, signal=50%  
3%, signal=50%  
5%, signal=67%  
4%, signal=27%  
8%, signal=54%  
8%, signal=67%  
9%, signal=41%  
8%, signal=36%  
5%, signal=75%  
6%, signal=43%  
1%, signal=79%  
0%, signal=44%  
2%, signal=38%  
%, signal=36%  
1%, signal=23%  
5%, signal=55%  
1%, signal=41%  
7%, signal=36%  
1%, signal=47%  
4%, signal=59%  
2%, signal=62%  
2%, signal=59%  
3%, signal=70%  
7%, signal=30%

6%, signal=38%  
6%, signal=67%  
3%, signal=35%  
6%, signal=56%  
2%, signal=39%  
6%, signal=53%  
4%, signal=78%  
3%, signal=36%  
9%, signal=94%  
, signal=22%  
0%, signal=65%  
0%, signal=40%  
1%, signal=59%  
9%, signal=39%  
4%, signal=50%  
2%, signal=24%  
8%, signal=51%  
1%, signal=41%  
0%, signal=39%  
4%, signal=88%  
, signal=14%  
6%, signal=32%  
0%, signal=23%  
, signal=23%  
7%, signal=43%  
7%, signal=63%  
4%, signal=40%  
, signal=31%  
9%, signal=39%  
6%, signal=45%  
5%, signal=36%  
9%, signal=40%  
8%, signal=40%  
0%, signal=42%  
7%, signal=73%  
8%, signal=36%  
5%, signal=86%  
7%, signal=30%  
1%, signal=32%  
6%, signal=42%  
5%, signal=32%  
3%, signal=65%  
2%, signal=96%  
1%, signal=117%  
7%, signal=47%  
0%, signal=44%  
6%, signal=41%  
7%, signal=94%  
6%, signal=27%  
1%, signal=47%  
5%, signal=60%  
4%, signal=37%  
8%, signal=57%  
9%, signal=34%  
0%, signal=78%  
3%, signal=39%  
2%, signal=41%  
7%, signal=32%

2%, signal=38%  
4%, signal=55%  
7%, signal=67%  
7%, signal=35%  
0%, signal=71%  
3%, signal=70%  
8%, signal=84%  
8%, signal=39%  
1%, signal=114%  
7%, signal=47%  
1%, signal=39%  
7%, signal=40%  
, signal=29%  
2%, signal=25%  
1%, signal=30%  
3%, signal=62%  
1%, signal=25%  
9%, signal=49%  
2%, signal=28%  
7%, signal=42%  
6%, signal=57%  
9%, signal=41%  
0%, signal=66%  
4%, signal=117%  
3%, signal=37%  
2%, signal=59%  
5%, signal=30%  
6%, signal=67%  
7%, signal=43%  
4%, signal=51%  
2%, signal=41%  
5%, signal=28%  
2%, signal=30%  
4%, signal=29%  
3%, signal=73%  
0%, signal=50%  
5%, signal=35%  
9%, signal=40%  
2%, signal=84%  
9%, signal=101%  
8%, signal=54%  
3%, signal=31%  
0%, signal=68%  
1%, signal=36%  
, signal=28%  
7%, signal=55%  
0%, signal=38%  
7%, signal=54%  
6%, signal=58%  
1%, signal=83%  
2%, signal=30%  
0%, signal=50%  
1%, signal=45%  
9%, signal=35%  
7%, signal=85%  
7%, signal=58%  
5%, signal=36%  
5%, signal=62%

4%, signal=44%  
2%, signal=38%  
9%, signal=34%  
0%, signal=40%  
9%, signal=31%  
9%, signal=63%  
8%, signal=41%  
6%, signal=66%  
6%, signal=33%  
0%, signal=27%  
, signal=22%  
8%, signal=66%  
4%, signal=25%  
1%, signal=74%  
9%, signal=37%  
4%, signal=35%  
8%, signal=44%  
1%, signal=27%  
4%, signal=32%  
1%, signal=60%  
8%, signal=42%  
1%, signal=69%  
6%, signal=41%  
7%, signal=50%  
1%, signal=44%  
1%, signal=39%  
8%, signal=46%  
5%, signal=30%  
, signal=28%  
7%, signal=57%  
8%, signal=34%  
9%, signal=62%  
5%, signal=75%  
4%, signal=41%  
1%, signal=71%  
2%, signal=40%  
5%, signal=29%  
5%, signal=44%  
9%, signal=59%  
2%, signal=45%  
0%, signal=36%  
8%, signal=49%  
0%, signal=46%  
1%, signal=42%  
8%, signal=37%  
6%, signal=70%  
5%, signal=33%  
, signal=29%  
7%, signal=58%  
3%, signal=35%  
1%, signal=64%  
4%, signal=44%  
1%, signal=40%  
9%, signal=33%  
2%, signal=87%  
7%, signal=57%  
2%, signal=59%  
3%, signal=22%



5%, signal=30%  
%, signal=17%  
%, signal=17%  
3%, signal=59%  
2%, signal=35%  
8%, signal=33%  
0%, signal=48%  
6%, signal=44%  
2%, signal=53%  
4%, signal=50%  
1%, signal=74%  
6%, signal=56%  
6%, signal=61%  
4%, signal=28%  
5%, signal=53%  
1%, signal=39%  
1%, signal=65%  
%, signal=25%  
4%, signal=50%  
7%, signal=53%  
1%, signal=41%  
2%, signal=32%  
7%, signal=33%  
6%, signal=40%  
7%, signal=40%  
%, signal=20%  
%, signal=26%  
9%, signal=53%  
2%, signal=33%  
1%, signal=53%  
0%, signal=36%  
%, signal=34%  
%, signal=19%  
2%, signal=48%  
9%, signal=40%  
7%, signal=33%  
4%, signal=56%  
1%, signal=45%  
3%, signal=37%  
3%, signal=34%  
6%, signal=27%  
%, signal=31%  
1%, signal=37%  
5%, signal=55%  
1%, signal=82%  
0%, signal=38%  
4%, signal=92%  
5%, signal=44%  
8%, signal=39%  
5%, signal=39%  
1%, signal=30%  
0%, signal=21%  
%, signal=22%  
0%, signal=28%  
2%, signal=29%  
8%, signal=33%  
6%, signal=55%  
4%, signal=36%

4%, signal=89%  
5%, signal=71%  
7%, signal=45%  
9%, signal=44%  
9%, signal=40%  
0%, signal=45%  
2%, signal=35%  
7%, signal=34%  
7%, signal=31%  
8%, signal=41%  
8%, signal=42%  
3%, signal=40%  
1%, signal=91%  
1%, signal=39%  
8%, signal=65%  
4%, signal=56%  
0%, signal=46%  
7%, signal=37%  
6%, signal=53%  
9%, signal=41%  
1%, signal=42%  
7%, signal=48%  
%, signal=18%  
4%, signal=91%  
1%, signal=54%  
2%, signal=46%  
9%, signal=41%  
8%, signal=33%  
%, signal=15%  
2%, signal=41%  
%, signal=18%  
%, signal=20%  
5%, signal=32%  
8%, signal=44%  
4%, signal=70%  
1%, signal=24%  
1%, signal=48%  
3%, signal=79%  
6%, signal=42%  
0%, signal=45%  
4%, signal=52%  
9%, signal=37%  
0%, signal=25%  
7%, signal=46%  
1%, signal=106%  
6%, signal=48%  
2%, signal=29%  
8%, signal=50%  
4%, signal=70%  
9%, signal=48%  
7%, signal=56%  
6%, signal=77%  
2%, signal=33%  
2%, signal=40%  
7%, signal=40%  
6%, signal=55%  
1%, signal=31%  
4%, signal=35%

2%, signal=45%  
2%, signal=24%  
0%, signal=50%  
, signal=23%  
6%, signal=42%  
1%, signal=38%  
9%, signal=34%  
2%, signal=53%  
3%, signal=44%  
1%, signal=50%  
4%, signal=35%  
4%, signal=47%  
2%, signal=64%  
, signal=31%  
7%, signal=56%  
8%, signal=53%  
3%, signal=33%  
2%, signal=28%  
4%, signal=68%  
4%, signal=33%  
7%, signal=69%  
8%, signal=33%  
1%, signal=97%  
2%, signal=39%  
8%, signal=30%  
2%, signal=37%  
4%, signal=47%  
2%, signal=56%  
0%, signal=24%  
4%, signal=32%  
8%, signal=105%  
, signal=16%  
0%, signal=37%  
6%, signal=46%  
4%, signal=36%  
1%, signal=86%  
5%, signal=37%  
, signal=22%  
7%, signal=33%  
9%, signal=39%  
4%, signal=47%  
0%, signal=21%  
9%, signal=53%  
7%, signal=29%  
0%, signal=74%  
1%, signal=44%  
7%, signal=30%  
0%, signal=30%  
6%, signal=30%  
5%, signal=76%  
8%, signal=44%  
, signal=24%  
4%, signal=35%  
5%, signal=26%  
7%, signal=35%  
7%, signal=35%  
2%, signal=78%  
6%, signal=57%

0%, signal=64%  
8%, signal=57%  
4%, signal=27%  
7%, signal=34%  
4%, signal=53%  
8%, signal=40%  
3%, signal=38%  
8%, signal=44%  
7%, signal=36%  
0%, signal=65%  
, signal=28%  
3%, signal=52%  
6%, signal=40%  
, signal=24%  
9%, signal=97%  
2%, signal=50%  
3%, signal=31%  
1%, signal=32%  
7%, signal=50%  
, signal=20%  
5%, signal=39%  
0%, signal=44%  
5%, signal=35%  
1%, signal=37%  
4%, signal=51%  
0%, signal=23%  
7%, signal=86%  
4%, signal=26%  
1%, signal=48%  
5%, signal=42%  
7%, signal=55%  
, signal=31%  
0%, signal=73%  
6%, signal=39%  
4%, signal=53%  
5%, signal=40%  
8%, signal=35%  
1%, signal=57%  
5%, signal=82%  
7%, signal=48%  
4%, signal=80%  
5%, signal=35%  
7%, signal=39%  
3%, signal=41%  
0%, signal=25%  
4%, signal=56%  
5%, signal=34%  
8%, signal=51%  
3%, signal=69%  
2%, signal=42%  
5%, signal=28%  
1%, signal=25%  
2%, signal=44%  
7%, signal=59%  
7%, signal=36%  
2%, signal=54%  
1%, signal=46%  
7%, signal=40%

5%, signal=33%  
3%, signal=43%  
8%, signal=33%  
3%, signal=61%  
2%, signal=32%  
6%, signal=30%  
8%, signal=30%  
9%, signal=49%  
6%, signal=51%  
3%, signal=40%  
7%, signal=63%  
, signal=19%  
, signal=26%  
5%, signal=61%  
3%, signal=44%  
, signal=28%  
8%, signal=54%  
4%, signal=33%  
7%, signal=33%  
7%, signal=35%  
3%, signal=41%  
4%, signal=28%  
7%, signal=36%  
3%, signal=48%  
6%, signal=93%  
9%, signal=52%  
9%, signal=71%  
0%, signal=50%  
2%, signal=65%  
9%, signal=74%  
5%, signal=36%  
1%, signal=44%  
2%, signal=47%  
2%, signal=41%  
4%, signal=56%  
, signal=21%  
0%, signal=37%  
2%, signal=43%  
2%, signal=37%  
0%, signal=29%  
2%, signal=33%  
2%, signal=64%  
2%, signal=38%  
0%, signal=46%  
1%, signal=25%  
8%, signal=38%  
2%, signal=39%  
1%, signal=119%  
1%, signal=124%  
4%, signal=33%  
1%, signal=58%  
, signal=30%  
0%, signal=58%  
5%, signal=61%  
9%, signal=31%  
7%, signal=40%  
6%, signal=40%  
7%, signal=33%

%, signal=15%  
1%, signal=36%  
7%, signal=48%  
8%, signal=42%  
8%, signal=36%  
1%, signal=21%  
2%, signal=40%  
1%, signal=32%  
6%, signal=52%  
9%, signal=57%  
6%, signal=33%  
2%, signal=26%  
1%, signal=70%  
7%, signal=64%  
3%, signal=41%  
3%, signal=41%  
4%, signal=28%  
6%, signal=60%  
4%, signal=32%  
6%, signal=28%  
3%, signal=39%  
7%, signal=58%  
3%, signal=31%  
%, signal=20%  
7%, signal=41%  
9%, signal=33%  
3%, signal=51%  
2%, signal=50%  
%, signal=26%  
0%, signal=41%  
%, signal=25%  
0%, signal=61%  
3%, signal=50%  
9%, signal=52%  
3%, signal=46%  
1%, signal=37%  
6%, signal=35%  
2%, signal=26%  
8%, signal=104%  
1%, signal=25%  
4%, signal=36%  
1%, signal=46%  
0%, signal=72%  
5%, signal=59%  
6%, signal=30%  
7%, signal=60%  
4%, signal=29%  
7%, signal=34%  
6%, signal=51%  
2%, signal=43%  
9%, signal=35%  
8%, signal=43%  
7%, signal=29%  
8%, signal=40%  
2%, signal=41%  
1%, signal=38%  
8%, signal=35%  
2%, signal=39%

5%, signal=35%  
%, signal=26%  
%, signal=26%  
2%, signal=47%  
4%, signal=30%  
0%, signal=37%  
2%, signal=54%  
6%, signal=57%  
2%, signal=36%  
2%, signal=60%  
4%, signal=73%  
8%, signal=39%  
%, signal=17%  
2%, signal=45%  
2%, signal=93%  
6%, signal=42%  
4%, signal=31%  
4%, signal=23%  
%, signal=20%  
9%, signal=47%  
2%, signal=31%  
6%, signal=34%  
8%, signal=38%  
5%, signal=60%  
4%, signal=32%  
3%, signal=68%  
6%, signal=34%  
1%, signal=33%  
0%, signal=39%  
6%, signal=28%  
8%, signal=46%  
8%, signal=32%  
6%, signal=43%  
9%, signal=57%  
7%, signal=42%  
1%, signal=38%  
7%, signal=73%  
7%, signal=26%  
5%, signal=41%  
%, signal=23%  
0%, signal=27%  
0%, signal=71%  
9%, signal=40%  
5%, signal=59%  
%, signal=21%  
2%, signal=41%  
1%, signal=31%  
3%, signal=48%  
7%, signal=35%  
%, signal=23%  
9%, signal=29%  
2%, signal=23%  
4%, signal=58%  
3%, signal=88%  
4%, signal=41%  
6%, signal=36%  
%, signal=18%  
3%, signal=44%

8%, signal=35%  
%, signal=23%  
1%, signal=44%  
5%, signal=31%  
4%, signal=66%  
%, signal=19%  
%, signal=27%  
5%, signal=30%  
%, signal=21%  
0%, signal=19%  
5%, signal=48%  
9%, signal=37%  
5%, signal=25%  
7%, signal=58%  
8%, signal=41%  
7%, signal=56%  
0%, signal=35%  
%, signal=31%  
0%, signal=24%  
8%, signal=41%  
5%, signal=57%  
0%, signal=25%  
3%, signal=30%  
5%, signal=41%  
1%, signal=24%  
6%, signal=30%  
9%, signal=41%  
7%, signal=32%  
2%, signal=74%  
2%, signal=25%  
2%, signal=30%  
4%, signal=54%  
8%, signal=40%  
5%, signal=67%  
6%, signal=35%  
2%, signal=45%  
%, signal=21%  
1%, signal=30%  
0%, signal=188%  
3%, signal=42%  
6%, signal=60%  
8%, signal=32%  
%, signal=18%  
1%, signal=41%  
1%, signal=57%  
7%, signal=34%  
1%, signal=27%  
9%, signal=48%  
2%, signal=37%  
4%, signal=51%  
8%, signal=40%  
6%, signal=34%  
8%, signal=93%  
7%, signal=28%  
1%, signal=60%  
4%, signal=26%  
3%, signal=27%  
3%, signal=68%



6%, signal=41%  
%, signal=22%  
7%, signal=41%  
6%, signal=34%  
7%, signal=57%  
8%, signal=83%  
7%, signal=34%  
2%, signal=41%  
2%, signal=36%  
3%, signal=62%  
3%, signal=33%  
4%, signal=70%  
2%, signal=42%  
3%, signal=81%  
5%, signal=25%  
0%, signal=118%  
2%, signal=51%  
2%, signal=41%  
2%, signal=23%  
9%, signal=51%  
2%, signal=48%  
6%, signal=33%  
4%, signal=34%  
1%, signal=23%  
3%, signal=65%  
8%, signal=59%  
5%, signal=25%  
0%, signal=56%  
%, signal=22%  
6%, signal=35%  
7%, signal=60%  
4%, signal=34%  
3%, signal=42%  
0%, signal=30%  
0%, signal=42%  
4%, signal=44%  
1%, signal=63%  
9%, signal=46%  
7%, signal=43%  
2%, signal=21%  
5%, signal=31%  
1%, signal=38%  
0%, signal=81%  
4%, signal=70%  
8%, signal=38%  
%, signal=14%  
5%, signal=33%  
6%, signal=37%  
4%, signal=57%  
1%, signal=50%  
%, signal=20%  
3%, signal=48%  
0%, signal=38%  
3%, signal=100%  
4%, signal=44%  
3%, signal=63%  
6%, signal=49%  
6%, signal=34%

7%, signal=56%  
3%, signal=53%  
3%, signal=43%  
6%, signal=43%  
2%, signal=42%  
4%, signal=34%  
0%, signal=58%  
0%, signal=41%  
4%, signal=33%  
7%, signal=38%  
9%, signal=41%  
4%, signal=47%  
5%, signal=49%  
3%, signal=50%  
5%, signal=28%  
4%, signal=36%  
8%, signal=96%  
9%, signal=28%  
4%, signal=49%  
4%, signal=46%  
%, signal=23%  
5%, signal=29%  
3%, signal=22%  
9%, signal=53%  
4%, signal=44%  
4%, signal=60%  
6%, signal=69%  
6%, signal=35%  
5%, signal=50%  
2%, signal=33%  
2%, signal=67%  
5%, signal=52%  
0%, signal=27%  
8%, signal=42%  
6%, signal=48%  
0%, signal=39%  
6%, signal=57%  
1%, signal=40%  
0%, signal=24%  
2%, signal=88%  
9%, signal=30%  
1%, signal=28%  
8%, signal=32%  
9%, signal=36%  
0%, signal=29%  
7%, signal=46%  
3%, signal=70%  
2%, signal=73%  
3%, signal=38%  
2%, signal=38%  
2%, signal=39%  
9%, signal=30%  
%, signal=28%  
1%, signal=60%  
2%, signal=46%  
9%, signal=71%  
5%, signal=50%  
1%, signal=54%

7%, signal=32%  
6%, signal=147%  
4%, signal=27%  
4%, signal=26%  
6%, signal=78%  
7%, signal=45%  
3%, signal=77%  
2%, signal=35%  
1%, signal=28%  
3%, signal=27%  
1%, signal=46%  
2%, signal=46%  
0%, signal=33%  
3%, signal=27%  
1%, signal=33%  
8%, signal=42%  
0%, signal=37%  
6%, signal=31%  
7%, signal=33%  
%, signal=14%  
7%, signal=45%  
6%, signal=27%  
0%, signal=36%  
8%, signal=64%  
1%, signal=46%  
8%, signal=63%  
%, signal=37%  
5%, signal=27%  
9%, signal=54%  
2%, signal=21%  
%, signal=36%  
0%, signal=50%  
1%, signal=25%  
4%, signal=46%  
4%, signal=47%  
5%, signal=31%  
7%, signal=34%  
7%, signal=34%  
3%, signal=115%  
8%, signal=99%  
7%, signal=42%  
2%, signal=77%  
2%, signal=52%  
4%, signal=36%  
4%, signal=46%  
5%, signal=56%  
9%, signal=33%  
%, signal=14%  
2%, signal=60%  
2%, signal=45%  
4%, signal=58%  
2%, signal=31%  
%, signal=13%  
5%, signal=30%  
6%, signal=47%  
0%, signal=40%  
9%, signal=46%  
2%, signal=28%

9%, signal=34%  
9%, signal=40%  
3%, signal=38%  
0%, signal=42%  
9%, signal=65%  
5%, signal=32%  
5%, signal=32%  
7%, signal=73%  
6%, signal=24%  
9%, signal=29%  
7%, signal=47%  
3%, signal=24%  
0%, signal=36%  
4%, signal=35%  
5%, signal=27%  
%, signal=22%  
5%, signal=35%  
3%, signal=45%  
7%, signal=63%  
8%, signal=39%  
4%, signal=79%  
2%, signal=45%  
4%, signal=40%  
7%, signal=28%  
4%, signal=61%  
4%, signal=52%  
0%, signal=32%  
8%, signal=49%  
4%, signal=44%  
%, signal=19%  
%, signal=20%  
%, signal=17%  
5%, signal=42%  
0%, signal=33%  
8%, signal=55%  
4%, signal=35%  
%, signal=18%  
2%, signal=71%  
2%, signal=30%  
7%, signal=32%  
8%, signal=53%  
0%, signal=25%  
9%, signal=51%  
7%, signal=45%  
8%, signal=37%  
0%, signal=25%  
5%, signal=60%  
1%, signal=26%  
2%, signal=23%  
%, signal=19%  
3%, signal=33%  
7%, signal=24%  
0%, signal=54%  
6%, signal=40%  
2%, signal=22%  
5%, signal=28%  
4%, signal=31%  
%, signal=21%

1%, signal=81%  
1%, signal=22%  
5%, signal=74%  
7%, signal=40%  
0%, signal=35%  
4%, signal=37%  
1%, signal=26%  
9%, signal=75%  
5%, signal=39%  
4%, signal=102%  
5%, signal=27%  
4%, signal=34%  
3%, signal=21%  
6%, signal=29%  
2%, signal=39%  
9%, signal=57%  
3%, signal=26%  
2%, signal=32%  
2%, signal=27%  
1%, signal=37%  
7%, signal=30%  
0%, signal=36%  
7%, signal=52%  
1%, signal=70%  
1%, signal=55%  
8%, signal=54%  
4%, signal=44%  
1%, signal=32%  
4%, signal=27%  
4%, signal=46%  
%, signal=13%  
8%, signal=32%  
8%, signal=63%  
4%, signal=31%  
3%, signal=59%  
6%, signal=58%  
8%, signal=43%  
9%, signal=34%  
8%, signal=57%  
7%, signal=29%  
6%, signal=70%  
0%, signal=20%  
1%, signal=41%  
0%, signal=23%  
6%, signal=96%  
3%, signal=69%  
3%, signal=38%  
%, signal=25%  
3%, signal=28%  
2%, signal=40%  
4%, signal=90%  
2%, signal=23%  
0%, signal=58%  
8%, signal=51%  
4%, signal=41%  
7%, signal=53%  
7%, signal=59%  
7%, signal=57%

4%, signal=45%  
1%, signal=42%  
7%, signal=69%  
4%, signal=36%  
3%, signal=28%  
8%, signal=95%  
6%, signal=53%  
%, signal=21%  
7%, signal=52%  
4%, signal=52%  
%, signal=22%  
5%, signal=32%  
0%, signal=25%  
1%, signal=37%  
0%, signal=18%  
%, signal=25%  
5%, signal=54%  
%, signal=32%  
6%, signal=31%  
6%, signal=135%  
8%, signal=44%  
3%, signal=24%  
3%, signal=25%  
%, signal=28%  
6%, signal=34%  
2%, signal=78%  
8%, signal=102%  
2%, signal=37%  
8%, signal=37%  
0%, signal=29%  
9%, signal=82%  
9%, signal=45%  
4%, signal=58%  
1%, signal=22%  
8%, signal=51%  
%, signal=19%  
2%, signal=55%  
%, signal=24%  
9%, signal=66%  
1%, signal=28%  
9%, signal=31%  
7%, signal=35%  
0%, signal=67%  
%, signal=23%  
5%, signal=27%  
4%, signal=54%  
7%, signal=43%  
%, signal=25%  
5%, signal=31%  
8%, signal=50%  
%, signal=22%  
4%, signal=81%  
%, signal=21%  
2%, signal=30%  
0%, signal=63%  
%, signal=20%  
%, signal=18%  
0%, signal=94%

5%, signal=31%  
9%, signal=46%  
6%, signal=77%  
4%, signal=72%  
5%, signal=86%  
7%, signal=30%  
0%, signal=61%  
8%, signal=63%  
, signal=23%  
9%, signal=41%  
9%, signal=41%  
3%, signal=38%  
4%, signal=22%  
, signal=21%  
0%, signal=31%  
0%, signal=23%  
7%, signal=54%  
0%, signal=122%  
2%, signal=39%  
8%, signal=37%  
0%, signal=25%  
8%, signal=55%  
1%, signal=37%  
5%, signal=43%  
4%, signal=57%  
1%, signal=21%  
0%, signal=46%  
1%, signal=49%  
1%, signal=30%  
8%, signal=29%  
6%, signal=31%  
6%, signal=32%  
5%, signal=28%  
9%, signal=44%  
8%, signal=42%  
0%, signal=42%  
9%, signal=41%  
7%, signal=30%  
9%, signal=34%  
7%, signal=29%  
9%, signal=44%  
4%, signal=37%  
, signal=22%  
9%, signal=51%  
1%, signal=49%  
, signal=16%  
7%, signal=56%  
1%, signal=24%  
7%, signal=44%  
7%, signal=29%  
8%, signal=32%  
6%, signal=76%  
3%, signal=76%  
7%, signal=29%  
9%, signal=32%  
2%, signal=25%  
4%, signal=57%  
9%, signal=61%

%, signal=20%  
8%, signal=27%  
9%, signal=40%  
%, signal=15%  
6%, signal=29%  
4%, signal=25%  
%, signal=13%  
0%, signal=26%  
4%, signal=25%  
6%, signal=59%  
3%, signal=47%  
4%, signal=26%  
9%, signal=38%  
6%, signal=27%  
7%, signal=49%  
7%, signal=38%  
1%, signal=33%  
4%, signal=22%  
9%, signal=52%  
7%, signal=57%  
3%, signal=41%  
6%, signal=30%  
7%, signal=32%  
2%, signal=25%  
0%, signal=42%  
6%, signal=53%  
2%, signal=112%  
5%, signal=33%  
1%, signal=25%  
%, signal=21%  
9%, signal=35%  
5%, signal=30%  
3%, signal=46%  
9%, signal=34%  
5%, signal=28%  
5%, signal=45%  
2%, signal=23%  
2%, signal=47%  
2%, signal=44%  
6%, signal=36%  
4%, signal=24%  
2%, signal=48%  
4%, signal=45%  
8%, signal=52%  
2%, signal=17%  
5%, signal=26%  
2%, signal=110%  
5%, signal=28%  
5%, signal=30%  
8%, signal=42%  
5%, signal=41%  
2%, signal=93%  
0%, signal=57%  
5%, signal=73%  
6%, signal=27%  
7%, signal=31%  
0%, signal=23%  
3%, signal=26%



%, signal=21%  
7%, signal=51%  
%, signal=13%  
1%, signal=21%  
3%, signal=22%  
1%, signal=51%  
3%, signal=31%  
0%, signal=22%  
%, signal=16%  
%, signal=17%  
0%, signal=26%  
1%, signal=44%  
%, signal=21%  
8%, signal=63%  
4%, signal=32%  
5%, signal=43%  
7%, signal=69%  
5%, signal=25%  
8%, signal=27%  
1%, signal=66%  
0%, signal=40%  
0%, signal=64%  
7%, signal=39%  
0%, signal=29%  
6%, signal=28%  
%, signal=20%  
%, signal=24%  
2%, signal=39%  
3%, signal=24%  
6%, signal=27%  
1%, signal=22%  
4%, signal=27%  
3%, signal=29%  
%, signal=15%  
3%, signal=75%  
7%, signal=25%  
6%, signal=29%  
1%, signal=20%  
2%, signal=32%  
2%, signal=32%  
7%, signal=52%  
0%, signal=26%  
8%, signal=34%  
8%, signal=47%  
2%, signal=30%  
6%, signal=68%  
9%, signal=54%  
2%, signal=101%  
2%, signal=47%  
2%, signal=27%  
0%, signal=30%  
2%, signal=53%  
1%, signal=22%  
%, signal=17%  
1%, signal=41%  
6%, signal=46%  
0%, signal=22%  
8%, signal=27%

0%, signal=18%  
8%, signal=49%  
1%, signal=53%  
5%, signal=25%  
0%, signal=55%  
4%, signal=31%  
2%, signal=39%  
8%, signal=31%  
6%, signal=44%  
, signal=15%  
7%, signal=33%  
4%, signal=49%  
5%, signal=45%  
6%, signal=46%  
5%, signal=57%  
2%, signal=43%  
9%, signal=41%  
, signal=15%  
7%, signal=50%  
7%, signal=28%  
3%, signal=36%  
, signal=18%  
2%, signal=57%  
1%, signal=66%  
2%, signal=60%  
8%, signal=29%  
, signal=24%  
0%, signal=34%  
7%, signal=34%  
7%, signal=47%  
0%, signal=34%  
3%, signal=32%  
1%, signal=52%  
0%, signal=42%  
, signal=14%  
, signal=21%  
4%, signal=30%  
3%, signal=38%  
4%, signal=26%  
8%, signal=48%  
2%, signal=41%  
3%, signal=25%  
, signal=17%  
, signal=12%  
7%, signal=56%  
8%, signal=35%  
1%, signal=22%  
7%, signal=44%  
6%, signal=25%  
9%, signal=50%  
9%, signal=38%  
9%, signal=36%  
7%, signal=26%  
7%, signal=29%  
9%, signal=134%  
9%, signal=31%  
7%, signal=125%  
3%, signal=87%

0%, signal=39%  
7%, signal=87%  
%, signal=21%  
7%, signal=26%  
1%, signal=42%  
2%, signal=61%  
9%, signal=63%  
2%, signal=41%  
2%, signal=82%  
%, signal=24%  
4%, signal=39%  
1%, signal=24%  
1%, signal=29%  
2%, signal=35%  
2%, signal=38%  
2%, signal=44%  
7%, signal=58%  
2%, signal=44%  
3%, signal=37%  
5%, signal=67%  
7%, signal=37%  
0%, signal=29%  
2%, signal=36%  
%, signal=22%  
2%, signal=42%  
5%, signal=24%  
8%, signal=78%  
2%, signal=24%  
7%, signal=28%  
5%, signal=83%  
0%, signal=40%  
3%, signal=25%  
4%, signal=28%  
3%, signal=68%  
1%, signal=81%  
9%, signal=43%  
7%, signal=35%  
2%, signal=40%  
1%, signal=33%  
6%, signal=68%  
0%, signal=32%  
%, signal=20%  
2%, signal=44%  
%, signal=12%  
1%, signal=41%  
%, signal=12%  
%, signal=13%  
0%, signal=22%  
3%, signal=54%  
0%, signal=41%  
6%, signal=59%  
1%, signal=74%  
6%, signal=55%  
5%, signal=65%  
5%, signal=39%  
2%, signal=35%  
1%, signal=64%  
7%, signal=66%

0%, signal=74%  
9%, signal=87%  
8%, signal=30%  
4%, signal=32%  
2%, signal=18%  
6%, signal=27%  
1%, signal=52%  
0%, signal=22%  
7%, signal=38%  
8%, signal=36%  
0%, signal=46%  
9%, signal=59%  
, signal=14%  
2%, signal=54%  
9%, signal=54%  
4%, signal=27%  
1%, signal=45%  
5%, signal=25%  
6%, signal=29%  
1%, signal=37%  
1%, signal=61%  
4%, signal=28%  
8%, signal=58%  
, signal=23%  
7%, signal=41%  
2%, signal=53%  
0%, signal=33%  
1%, signal=54%  
6%, signal=24%  
1%, signal=55%  
0%, signal=26%  
6%, signal=42%  
5%, signal=27%  
5%, signal=82%  
6%, signal=25%  
2%, signal=21%  
8%, signal=57%  
1%, signal=48%  
0%, signal=22%  
0%, signal=66%  
2%, signal=43%  
2%, signal=29%  
, signal=13%  
, signal=15%  
0%, signal=36%  
3%, signal=23%  
0%, signal=28%  
3%, signal=83%  
5%, signal=26%  
2%, signal=21%  
3%, signal=34%  
5%, signal=48%  
5%, signal=27%  
7%, signal=25%  
5%, signal=63%  
9%, signal=34%  
9%, signal=38%  
2%, signal=42%

%, signal=14%  
7%, signal=33%  
7%, signal=33%  
1%, signal=47%  
3%, signal=21%  
2%, signal=24%  
8%, signal=58%  
7%, signal=30%  
6%, signal=28%  
8%, signal=96%  
1%, signal=20%  
4%, signal=29%  
0%, signal=54%  
5%, signal=24%  
0%, signal=33%  
6%, signal=124%  
8%, signal=60%  
8%, signal=38%  
%, signal=22%  
%, signal=18%  
4%, signal=49%  
7%, signal=46%  
9%, signal=29%  
5%, signal=45%  
8%, signal=57%  
%, signal=17%  
8%, signal=29%  
7%, signal=44%  
1%, signal=23%  
%, signal=19%  
5%, signal=25%  
7%, signal=54%  
8%, signal=31%  
0%, signal=48%  
7%, signal=45%  
7%, signal=56%  
1%, signal=33%  
0%, signal=28%  
6%, signal=24%  
2%, signal=54%  
3%, signal=21%  
5%, signal=48%  
6%, signal=30%  
8%, signal=93%  
2%, signal=56%  
7%, signal=24%  
6%, signal=117%  
6%, signal=22%  
0%, signal=40%  
2%, signal=36%  
7%, signal=30%  
2%, signal=23%  
5%, signal=44%  
9%, signal=54%  
8%, signal=28%  
9%, signal=53%  
6%, signal=31%  
6%, signal=25%

2%, signal=33%  
8%, signal=65%  
6%, signal=39%  
2%, signal=34%  
7%, signal=31%  
7%, signal=43%  
8%, signal=24%  
4%, signal=73%  
0%, signal=34%  
0%, signal=112%  
4%, signal=56%  
1%, signal=34%  
4%, signal=53%  
%, signal=17%  
3%, signal=36%  
0%, signal=47%  
1%, signal=69%  
%, signal=14%  
9%, signal=28%  
4%, signal=91%  
2%, signal=23%  
%, signal=22%  
8%, signal=31%  
4%, signal=51%  
8%, signal=65%  
0%, signal=67%  
4%, signal=19%  
5%, signal=32%  
8%, signal=61%  
%, signal=11%  
7%, signal=28%  
7%, signal=46%  
1%, signal=66%  
7%, signal=27%  
2%, signal=47%  
%, signal=20%  
8%, signal=55%  
3%, signal=22%  
9%, signal=54%  
8%, signal=45%  
2%, signal=21%  
%, signal=14%  
6%, signal=43%  
1%, signal=30%  
1%, signal=19%  
6%, signal=61%  
0%, signal=31%  
4%, signal=26%  
5%, signal=38%  
7%, signal=42%  
1%, signal=101%  
7%, signal=26%  
5%, signal=24%  
%, signal=11%  
2%, signal=89%  
4%, signal=39%  
0%, signal=59%  
6%, signal=45%

9%, signal=25%  
9%, signal=28%  
8%, signal=84%  
5%, signal=25%  
8%, signal=49%  
9%, signal=53%  
5%, signal=29%  
6%, signal=26%  
, signal=12%  
7%, signal=33%  
7%, signal=38%  
2%, signal=61%  
8%, signal=30%  
8%, signal=43%  
5%, signal=118%  
4%, signal=27%  
, signal=15%  
, signal=17%  
9%, signal=53%  
9%, signal=65%  
9%, signal=44%  
2%, signal=33%  
6%, signal=43%  
5%, signal=76%  
6%, signal=28%  
8%, signal=37%  
1%, signal=34%  
5%, signal=56%  
2%, signal=52%  
6%, signal=57%  
8%, signal=63%  
, signal=13%  
2%, signal=83%  
5%, signal=60%  
8%, signal=27%  
2%, signal=44%  
3%, signal=21%  
7%, signal=88%  
4%, signal=59%  
4%, signal=25%  
3%, signal=22%  
7%, signal=45%  
8%, signal=83%  
8%, signal=62%  
6%, signal=28%  
0%, signal=52%  
0%, signal=23%  
1%, signal=67%  
0%, signal=22%  
9%, signal=29%  
1%, signal=38%  
2%, signal=18%  
7%, signal=88%  
8%, signal=42%  
, signal=22%  
8%, signal=28%  
4%, signal=34%  
3%, signal=22%

5%, signal=107%  
7%, signal=65%  
8%, signal=26%  
4%, signal=27%  
3%, signal=56%  
0%, signal=31%  
2%, signal=32%  
9%, signal=54%  
4%, signal=63%  
8%, signal=32%  
7%, signal=40%  
7%, signal=46%  
, signal=22%  
2%, signal=44%  
8%, signal=28%  
3%, signal=64%  
, signal=11%  
7%, signal=28%

7%, signal=54%  
, signal=13%  
5%, signal=70%  
0%, signal=67%  
5%, signal=22%  
2%, signal=84%  
1%, signal=51%  
9%, signal=49%  
8%, signal=56%  
6%, signal=78%  
7%, signal=27%  
5%, signal=73%  
, signal=16%  
8%, signal=70%  
0%, signal=34%  
4%, signal=58%  
2%, signal=68%  
5%, signal=26%  
6%, signal=38%  
6%, signal=57%  
7%, signal=28%  
5%, signal=45%  
3%, signal=25%  
2%, signal=18%  
2%, signal=54%  
, signal=11%  
, signal=13%  
6%, signal=42%  
2%, signal=61%  
5%, signal=50%  
5%, signal=19%  
3%, signal=57%  
0%, signal=17%  
0%, signal=34%  
8%, signal=61%  
3%, signal=58%  
8%, signal=46%  
1%, signal=48%  
3%, signal=32%



9%, signal=33%  
0%, signal=24%  
9%, signal=90%  
2%, signal=52%  
3%, signal=71%  
4%, signal=29%  
0%, signal=11%  
9%, signal=72%  
4%, signal=31%  
8%, signal=23%  
4%, signal=24%  
1%, signal=13%  
2%, signal=68%  
2%, signal=49%

7%, signal=24%  
7%, signal=35%  
8%, signal=48%  
3%, signal=35%  
9%, signal=71%  
5%, signal=77%  
8%, signal=74%  
1%, signal=51%  
3%, signal=52%  
7%, signal=115%

6%, signal=96%  
9%, signal=80%

4%, signal=72%  
9%, signal=22%  
8%, signal=46%

# LOW-ETV7

| NAME        | GS<br> follow        | GS DETAIL   | SIZE | ES   | NES   | NOM p | FDR q-v | FWER p-v | RANK | LEADING EDGE            |
|-------------|----------------------|-------------|------|------|-------|-------|---------|----------|------|-------------------------|
| GO RESPON   | GO RESPONSI          | Details ... | 195  | 0.8  | 2.717 | 0     | 0       | 0        | 4226 | tags=57%, list=7%, sign |
| GO TUMOR    | GO TUMOR N           | Details ... | 167  | 0.71 | 2.664 | 0     | 0       | 0        | 7722 | tags=55%, list=13%, sig |
| GO RESPON   | GO RESPONSI          | Details ... | 337  | 0.68 | 2.649 | 0     | 0       | 0        | 3967 | tags=41%, list=7%, sign |
| GO DEFENS   | GO DEFENSE           | Details ... | 248  | 0.72 | 2.642 | 0     | 0       | 0        | 4091 | tags=44%, list=7%, sign |
| GO INTERFE  | GO INTERFER          | Details ... | 89   | 0.88 | 2.635 | 0     | 0       | 0        | 2184 | tags=63%, list=4%, sign |
| GO RESPON   | GO RESPONSI          | Details ... | 98   | 0.83 | 2.635 | 0     | 0       | 0        | 2184 | tags=48%, list=4%, sign |
| GO T CELL I | GO T CELL RI         | Details ... | 200  | 0.75 | 2.614 | 0     | 0       | 0        | 2512 | tags=45%, list=4%, sign |
| GO NEGATI   | GO NEGATIV           | Details ... | 100  | 0.76 | 2.561 | 0     | 0       | 0        | 1638 | tags=39%, list=3%, sign |
| GO NEGATI   | GO NEGATIV           | Details ... | 157  | 0.7  | 2.547 | 0     | 0       | 0        | 4992 | tags=45%, list=9%, sign |
| GO REGULA   | GO REGULAT           | Details ... | 397  | 0.66 | 2.519 | 0     | 0       | 0        | 5145 | tags=41%, list=9%, sign |
| GO LEUKOC   | GO LEUKOCY           | Details ... | 106  | 0.75 | 2.51  | 0     | 0       | 0        | 4639 | tags=54%, list=8%, sign |
| GO CELL KI  | GO CELL KILI         | Details ... | 168  | 0.71 | 2.508 | 0     | 0       | 0        | 7298 | tags=55%, list=12%, sig |
| GO REGULA   | GO REGULAT           | Details ... | 300  | 0.68 | 2.504 | 0     | 0       | 0        | 5145 | tags=44%, list=9%, sign |
| GO RESPON   | GO RESPONSI          | Details ... | 27   | 0.85 | 2.503 | 0     | 0       | 0        | 3436 | tags=56%, list=6%, sign |
| GO NEGATI   | GO NEGATIV           | Details ... | 82   | 0.76 | 2.501 | 0     | 0       | 0        | 1638 | tags=41%, list=3%, sign |
| GO T CELL I | GO T CELL M          | Details ... | 102  | 0.73 | 2.493 | 0     | 0       | 0        | 4639 | tags=46%, list=8%, sign |
| GO NATURA   | GO NATURAL           | Details ... | 84   | 0.71 | 2.49  | 0     | 0       | 0        | 3951 | tags=44%, list=7%, sign |
| GO REGULA   | GO REGULAT           | Details ... | 90   | 0.8  | 2.487 | 0     | 0       | 0        | 5312 | tags=61%, list=9%, sign |
| GO NEGATI   | GO NEGATIV           | Details ... | 150  | 0.69 | 2.484 | 0     | 0       | 0        | 3062 | tags=38%, list=5%, sign |
| GO ANTIGE   | GO ANTIGEN           | Details ... | 99   | 0.8  | 2.473 | 0     | 0       | 0        | 2352 | tags=48%, list=4%, sign |
| GO NEGATI   | GO NEGATIV           | Details ... | 133  | 0.67 | 2.471 | 0     | 0       | 0        | 4797 | tags=38%, list=8%, sign |
| GO NEGATI   | GO NEGATIV           | Details ... | 45   | 0.74 | 2.471 | 0     | 0       | 0        | 2916 | tags=38%, list=5%, sign |
| GO PHAGOC   | GO PHAGOCY           | Details ... | 75   | 0.76 | 2.47  | 0     | 0       | 0        | 3436 | tags=51%, list=6%, sign |
| GO REGULA   | GO REGULAT           | Details ... | 146  | 0.72 | 2.468 | 0     | 0       | 0        | 4639 | tags=50%, list=8%, sign |
| GO PROGRA   | GO PROGRAM           | Details ... | 49   | 0.73 | 2.461 | 0     | 0       | 0        | 6083 | tags=55%, list=10%, sig |
| GO NEGATI   | GO NEGATIV           | Details ... | 61   | 0.74 | 2.457 | 0     | 0       | 0        | 4992 | tags=51%, list=9%, sign |
| GO RESPON   | GO RESPONSI          | Details ... | 308  | 0.6  | 2.452 | 0     | 0       | 0        | 6375 | tags=42%, list=11%, sig |
| GO POSITIV  | GO POSITIVE          | Details ... | 26   | 0.85 | 2.45  | 0     | 0       | 0        | 2307 | tags=54%, list=4%, sign |
| GO REGULA   | GO REGULAT           | Details ... | 151  | 0.67 | 2.449 | 0     | 0       | 0        | 5636 | tags=42%, list=10%, sig |
| GO POSITIV  | GO POSITIVE          | Details ... | 245  | 0.66 | 2.449 | 0     | 0       | 0        | 5145 | tags=42%, list=9%, sign |
| GO POSITIV  | GO POSITIVE          | Details ... | 208  | 0.67 | 2.443 | 0     | 0       | 0        | 5145 | tags=44%, list=9%, sign |
| GO NEGATI   | GO NEGATIV           | Details ... | 94   | 0.69 | 2.442 | 0     | 0       | 0        | 4992 | tags=45%, list=9%, sign |
| GO NECROT   | GO NECROTI           | Details ... | 61   | 0.67 | 2.442 | 0     | 0       | 0        | 6795 | tags=49%, list=12%, sig |
| GO NEGATI   | GO NEGATIV           | Details ... | 42   | 0.81 | 2.442 | 0     | 0       | 0        | 4639 | tags=60%, list=8%, sign |
| GO T CELL I | GO T CELL A          | Details ... | 109  | 0.7  | 2.437 | 0     | 0       | 0        | 3951 | tags=44%, list=7%, sign |
| GO ANTIGE   | GO ANTIGEN           | Details ... | 80   | 0.85 | 2.434 | 0     | 0       | 0        | 2352 | tags=54%, list=4%, sign |
| GO NEGATI   | GO NEGATIV           | Details ... | 61   | 0.68 | 2.431 | 0     | 0       | 0        | 5319 | tags=48%, list=9%, sign |
| GO REGULA   | GO REGULAT           | Details ... | 37   | 0.79 | 2.421 | 0     | 0       | 0        | 2307 | tags=46%, list=4%, sign |
| GO ANTIGE   | GO ANTIGEN           | Details ... | 228  | 0.7  | 2.42  | 0     | 0       | 0        | 3517 | tags=39%, list=6%, sign |
| GO REGULA   | GO REGULAT           | Details ... | 160  | 0.69 | 2.416 | 0     | 0       | 0        | 4639 | tags=44%, list=8%, sign |
| GO INTERFE  | GO INTERFERON GAMM   |             | 112  | 0.74 | 2.415 | 0     | 0       | 0        | 6299 | tags=59%, list=11%, sig |
| GO T CELL I | GO T CELL PROLIFERAT |             | 191  | 0.68 | 2.415 | 0     | 0       | 0        | 3062 | tags=38%, list=5%, sign |
| GO NEGATI   | GO NEGATIVE REGULA   |             | 48   | 0.75 | 2.411 | 0     | 0       | 0        | 4639 | tags=54%, list=8%, sign |
| GO POSITIV  | GO POSITIVE REGULATI |             | 374  | 0.61 | 2.408 | 0     | 0       | 0        | 6109 | tags=42%, list=10%, sig |
| GO ANTIGE   | GO ANTIGEN RECEPTOF  |             | 306  | 0.72 | 2.405 | 0     | 0       | 0        | 6103 | tags=51%, list=10%, sig |
| GO REGULA   | GO REGULATION OF DE  |             | 71   | 0.72 | 2.404 | 0     | 0       | 0        | 3254 | tags=41%, list=6%, sign |
| GO NEGATI   | GO NEGATIVE REGULA   |             | 57   | 0.79 | 2.404 | 0     | 0       | 0        | 1550 | tags=49%, list=3%, sign |
| GO ACTIVA   | GO ACTIVATION OF CY  |             | 84   | 0.62 | 2.401 | 0     | 0       | 0        | 6948 | tags=51%, list=12%, sig |
| GO REGULA   | GO REGULATION OF T C |             | 71   | 0.73 | 2.398 | 0     | 0       | 0        | 4639 | tags=45%, list=8%, sign |
| GO REGULA   | GO REGULATION OF LEI |             | 202  | 0.68 | 2.396 | 0     | 0       | 0        | 4977 | tags=49%, list=9%, sign |
| GO POSITIV  | GO POSITIVE REGULATI |             | 98   | 0.73 | 2.396 | 0     | 0       | 0        | 4152 | tags=50%, list=7%, sign |
| GO ANTIGE   | GO ANTIGEN PROCESSII |             | 190  | 0.72 | 2.395 | 0     | 0       | 0        | 3473 | tags=41%, list=6%, sign |
| GO MYD88 I  | GO MYD88 INDEPENDEN  |             | 34   | 0.78 | 2.363 | 0     | #####   | 0.001    | 6083 | tags=74%, list=10%, sig |
| GO POSITIV  | GO POSITIVE REGULATI |             | 59   | 0.82 | 2.363 | 0     | #####   | 0.001    | 3623 | tags=58%, list=6%, sign |
| GO NEGATI   | GO NEGATIVE REGULA   |             | 52   | 0.77 | 2.365 | 0     | #####   | 0.001    | 4639 | tags=58%, list=8%, sign |
| GO INTERLE  | GO INTERLEUKIN 10 PR |             | 61   | 0.73 | 2.368 | 0     | #####   | 0.001    | 5312 | tags=51%, list=9%, sign |
| GO NEGATI   | GO NEGATIVE REGULA   |             | 44   | 0.76 | 2.37  | 0     | #####   | 0.001    | 952  | tags=36%, list=2%, sign |

|             |                       |     |      |       |   |       |       |      |                         |
|-------------|-----------------------|-----|------|-------|---|-------|-------|------|-------------------------|
| GO REGULA   | GO REGULATION OF AL   | 96  | 0.71 | 2.37  | 0 | ##### | 0.001 | 3033 | tags=41%, list=5%, sign |
| GO T CELL   | GO T CELL MEDIATED C  | 42  | 0.81 | 2.378 | 0 | ##### | 0.001 | 4639 | tags=60%, list=8%, sign |
| GO REGULA   | GO REGULATION OF LEI  | 73  | 0.8  | 2.388 | 0 | ##### | 0.001 | 4977 | tags=62%, list=9%, sign |
| GO POSITIV  | GO POSITIVE REGULATI  | 93  | 0.67 | 2.389 | 0 | ##### | 0.001 | 4977 | tags=45%, list=9%, sign |
| GO NATURA   | GO NATURAL KILLER C   | 65  | 0.8  | 2.389 | 0 | ##### | 0.001 | 4152 | tags=65%, list=7%, sign |
| GO REGULA   | GO REGULATION OF IM   | 452 | 0.66 | 2.342 | 0 | ##### | 0.001 | 6328 | tags=48%, list=11%, sig |
| GO NEGATI'  | GO NEGATIVE REGULA'   | 121 | 0.66 | 2.342 | 0 | ##### | 0.001 | 5890 | tags=44%, list=10%, sig |
| GO POSITIV  | GO POSITIVE REGULATI  | 64  | 0.77 | 2.343 | 0 | ##### | 0.001 | 3594 | tags=53%, list=6%, sign |
| GO REGULA   | GO REGULATION OF RE   | 190 | 0.6  | 2.343 | 0 | ##### | 0.001 | 7722 | tags=43%, list=13%, sig |
| GO NEGATI'  | GO NEGATIVE REGULA'   | 54  | 0.67 | 2.343 | 0 | ##### | 0.001 | 2916 | tags=31%, list=5%, sign |
| GO REGULA   | GO REGULATION OF PR   | 136 | 0.63 | 2.348 | 0 | ##### | 0.001 | 4977 | tags=40%, list=9%, sign |
| GO POSITIV  | GO POSITIVE REGULATI  | 100 | 0.74 | 2.348 | 0 | ##### | 0.001 | 3033 | tags=42%, list=5%, sign |
| GO NIK NF I | GO NIK NF KAPPAB SIGI | 181 | 0.62 | 2.349 | 0 | ##### | 0.001 | 5095 | tags=38%, list=9%, sign |
| GO NEGATI'  | GO NEGATIVE REGULA'   | 83  | 0.67 | 2.35  | 0 | ##### | 0.001 | 3062 | tags=41%, list=5%, sign |
| GO POSITIV  | GO POSITIVE REGULATI  | 130 | 0.68 | 2.352 | 0 | ##### | 0.001 | 2648 | tags=43%, list=5%, sign |
| GO ALPHA I  | GO ALPHA BETA T CELI  | 145 | 0.68 | 2.341 | 0 | ##### | 0.001 | 5785 | tags=47%, list=10%, sig |
| GO TUMOR    | GO TUMOR NECROSIS F   | 46  | 0.72 | 2.341 | 0 | ##### | 0.001 | 7035 | tags=61%, list=12%, sig |
| GO REGULA   | GO REGULATION OF NA   | 44  | 0.86 | 2.333 | 0 | ##### | 0.001 | 4639 | tags=82%, list=8%, sign |
| GO T CELL   | GO T CELL ACTIVATION  | 475 | 0.62 | 2.336 | 0 | ##### | 0.001 | 5856 | tags=43%, list=10%, sig |
| GO T CELL I | GO T CELL DIFFERENTL  | 71  | 0.71 | 2.337 | 0 | ##### | 0.001 | 3678 | tags=46%, list=6%, sign |
| GO REGULA   | GO REGULATION OF T C  | 325 | 0.64 | 2.337 | 0 | ##### | 0.001 | 3340 | tags=37%, list=6%, sign |
| GO MODUL    | GO MODULATION BY SY   | 44  | 0.74 | 2.337 | 0 | ##### | 0.001 | 6795 | tags=52%, list=12%, sig |
| GO LYMPHC   | GO LYMPHOCYTE MEDI    | 345 | 0.73 | 2.331 | 0 | ##### | 0.001 | 7314 | tags=60%, list=13%, sig |
| GO NUCLEC   | GO NUCLEOSIDE CATAI   | 31  | 0.74 | 2.332 | 0 | ##### | 0.001 | 9155 | tags=65%, list=16%, sig |
| GO REGULA   | GO REGULATION OF T C  | 32  | 0.77 | 2.333 | 0 | ##### | 0.001 | 2050 | tags=41%, list=4%, sign |
| GO CD4 POS  | GO CD4 POSITIVE ALPH  | 96  | 0.66 | 2.327 | 0 | ##### | 0.002 | 3062 | tags=40%, list=5%, sign |
| GO PROTEIN  | GO PROTEIN ADP RIBOS  | 32  | 0.72 | 2.328 | 0 | ##### | 0.002 | 3915 | tags=47%, list=7%, sign |
| GO NEGATI'  | GO NEGATIVE REGULA'   | 436 | 0.6  | 2.329 | 0 | ##### | 0.002 | 6384 | tags=39%, list=11%, sig |
| GO REGULA   | GO REGULATION OF VII  | 37  | 0.77 | 2.33  | 0 | ##### | 0.002 | 1764 | tags=41%, list=3%, sign |
| GO REGULA   | GO REGULATION OF NA   | 34  | 0.79 | 2.321 | 0 | ##### | 0.003 | 3033 | tags=50%, list=5%, sign |
| GO REGULA   | GO REGULATION OF TU   | 57  | 0.65 | 2.323 | 0 | ##### | 0.003 | 7722 | tags=54%, list=13%, sig |
| GO POSITIV  | GO POSITIVE REGULATI  | 159 | 0.62 | 2.324 | 0 | ##### | 0.003 | 7035 | tags=51%, list=12%, sig |
| GO POSITIV  | GO POSITIVE REGULATI  | 54  | 0.72 | 2.325 | 0 | ##### | 0.003 | 2315 | tags=43%, list=4%, sign |
| GO IMMUNE   | GO IMMUNE RESPONSE    | 496 | 0.66 | 2.325 | 0 | ##### | 0.003 | 6131 | tags=46%, list=11%, sig |
| GO RESPON   | GO RESPONSE TO INTEF  | 206 | 0.6  | 2.304 | 0 | ##### | 0.004 | 5368 | tags=36%, list=9%, sign |
| GO REGULA   | GO REGULATION OF CD   | 62  | 0.68 | 2.307 | 0 | ##### | 0.004 | 2916 | tags=37%, list=5%, sign |
| GO POSITIV  | GO POSITIVE REGULATI  | 213 | 0.64 | 2.308 | 0 | ##### | 0.004 | 3075 | tags=37%, list=5%, sign |
| GO T CELL   | GO T CELL APOPTOTIC I | 49  | 0.68 | 2.31  | 0 | ##### | 0.004 | 3621 | tags=47%, list=6%, sign |
| GO REGULA   | GO REGULATION OF LEI  | 236 | 0.64 | 2.311 | 0 | ##### | 0.004 | 3062 | tags=36%, list=5%, sign |
| GO INTERLE  | GO INTERLEUKIN 17 PR  | 43  | 0.73 | 2.312 | 0 | ##### | 0.004 | 7273 | tags=51%, list=12%, sig |
| GO PHAGOC   | GO PHAGOCYTIC VESIC   | 138 | 0.64 | 2.314 | 0 | ##### | 0.004 | 4392 | tags=41%, list=8%, sign |
| GO POSITIV  | GO POSITIVE REGULATI  | 450 | 0.6  | 2.298 | 0 | ##### | 0.005 | 4977 | tags=39%, list=9%, sign |
| GO REGULA   | GO REGULATION OF CY   | 82  | 0.68 | 2.299 | 0 | ##### | 0.005 | 2315 | tags=37%, list=4%, sign |
| GO POSITIV  | GO POSITIVE REGULATI  | 48  | 0.75 | 2.3   | 0 | ##### | 0.005 | 3033 | tags=40%, list=5%, sign |
| GO ALPHA I  | GO ALPHA BETA T CELI  | 35  | 0.78 | 2.3   | 0 | ##### | 0.005 | 5312 | tags=54%, list=9%, sign |
| GO NEGATI'  | GO NEGATIVE REGULA'   | 39  | 0.7  | 2.297 | 0 | ##### | 0.006 | 2916 | tags=36%, list=5%, sign |
| GO REGULA   | GO REGULATION OF T C  | 42  | 0.75 | 2.291 | 0 | ##### | 0.006 | 5319 | tags=60%, list=9%, sign |
| GO REGULA   | GO REGULATION OF T C  | 148 | 0.64 | 2.292 | 0 | ##### | 0.006 | 3623 | tags=37%, list=6%, sign |
| GO LYMPHC   | GO LYMPHOCYTE APOF    | 73  | 0.64 | 2.297 | 0 | ##### | 0.006 | 3621 | tags=40%, list=6%, sign |
| GO ALPHA I  | GO ALPHA BETA T CELI  | 63  | 0.69 | 2.285 | 0 | ##### | 0.006 | 2916 | tags=43%, list=5%, sign |
| GO POSITIV  | GO POSITIVE REGULATI  | 102 | 0.69 | 2.285 | 0 | ##### | 0.006 | 4152 | tags=40%, list=7%, sign |
| GO RESPIRA  | GO RESPIRATORY BURS   | 34  | 0.79 | 2.285 | 0 | ##### | 0.006 | 6750 | tags=65%, list=12%, sig |
| GO T CELL   | GO T CELL CYTOKINE P  | 43  | 0.71 | 2.288 | 0 | ##### | 0.006 | 3436 | tags=40%, list=6%, sign |
| GO RESPON   | GO RESPONSE TO INTEF  | 28  | 0.79 | 2.262 | 0 | ##### | 0.008 | 1015 | tags=46%, list=2%, sign |
| GO REGULA   | GO REGULATION OF T C  | 33  | 0.81 | 2.271 | 0 | ##### | 0.008 | 4639 | tags=55%, list=8%, sign |
| GO NEGATI'  | GO NEGATIVE REGULA'   | 23  | 0.85 | 2.28  | 0 | ##### | 0.007 | 5319 | tags=70%, list=9%, sign |
| GO REGULA   | GO REGULATION OF CD   | 48  | 0.72 | 2.263 | 0 | ##### | 0.008 | 2916 | tags=40%, list=5%, sign |
| GO LEUKOC   | GO LEUKOCYTE PROLIF   | 309 | 0.61 | 2.271 | 0 | ##### | 0.008 | 5596 | tags=38%, list=10%, sig |

|              |                      |     |      |       |   |       |       |       |                         |
|--------------|----------------------|-----|------|-------|---|-------|-------|-------|-------------------------|
| GO INTERLEU  | GO INTERLEUKIN 1 MEI | 103 | 0.67 | 2.283 | 0 | ##### | 0.007 | 7814  | tags=49%, list=13%, sig |
| GO POSITIV   | GO POSITIVE REGULATI | 232 | 0.66 | 2.264 | 0 | ##### | 0.008 | 3188  | tags=40%, list=5%, sign |
| GO REGULA    | GO REGULATION OF VII | 95  | 0.67 | 2.272 | 0 | ##### | 0.008 | 3263  | tags=37%, list=6%, sign |
| GO POSITIV   | GO POSITIVE REGULATI | 20  | 0.83 | 2.279 | 0 | ##### | 0.008 | 3033  | tags=55%, list=5%, sign |
| GO ADAPTI'   | GO ADAPTIVE IMMUNE   | 349 | 0.71 | 2.264 | 0 | ##### | 0.008 | 7314  | tags=57%, list=13%, sig |
| GO INNATE    | GO INNATE IMMUNE RE  | 116 | 0.66 | 2.272 | 0 | ##### | 0.008 | 6872  | tags=45%, list=12%, sig |
| GO REGULA    | GO REGULATION OF SY  | 225 | 0.6  | 2.266 | 0 | ##### | 0.008 | 6065  | tags=39%, list=10%, sig |
| GO NEGATI'   | GO NEGATIVE REGULA'  | 31  | 0.81 | 2.276 | 0 | ##### | 0.008 | 5319  | tags=58%, list=9%, sign |
| GO NEGATI'   | GO NEGATIVE REGULA'  | 201 | 0.62 | 2.267 | 0 | ##### | 0.008 | 3331  | tags=34%, list=6%, sign |
| GO LYMPHC    | GO LYMPHOCYTE ACTI'  | 181 | 0.63 | 2.277 | 0 | ##### | 0.008 | 4039  | tags=37%, list=7%, sign |
| GO POSITIV   | GO POSITIVE REGULATI | 149 | 0.66 | 2.261 | 0 | ##### | 0.008 | 3033  | tags=37%, list=5%, sign |
| GO ACTIVA'   | GO ACTIVATION OF INN | 140 | 0.64 | 2.262 | 0 | ##### | 0.008 | 5312  | tags=39%, list=9%, sign |
| GO LEUKOC    | GO LEUKOCYTE CELL C  | 358 | 0.62 | 2.259 | 0 | ##### | 0.008 | 5319  | tags=41%, list=9%, sign |
| GO THREON    | GO THREONINE TYPE PI | 31  | 0.81 | 2.26  | 0 | ##### | 0.008 | 3035  | tags=48%, list=5%, sign |
| GO LUMEN/    | GO LUMENAL SIDE OF M | 33  | 0.87 | 2.26  | 0 | ##### | 0.008 | 2478  | tags=61%, list=4%, sign |
| GO PATTERN   | GO PATTERN RECOGNI'  | 194 | 0.61 | 2.257 | 0 | ##### | 0.01  | 7299  | tags=46%, list=13%, sig |
| GO TRANSF    | GO TRANSFERASE ACTI  | 44  | 0.62 | 2.257 | 0 | ##### | 0.01  | 4201  | tags=34%, list=7%, sign |
| GO POSITIV   | GO POSITIVE REGULATI | 186 | 0.58 | 2.254 | 0 | ##### | 0.01  | 6083  | tags=41%, list=10%, sig |
| GO REGULA    | GO REGULATION OF RE  | 25  | 0.76 | 2.258 | 0 | ##### | 0.01  | 3625  | tags=48%, list=6%, sign |
| GO NEGATI'   | GO NEGATIVE REGULA'  | 27  | 0.71 | 2.255 | 0 | ##### | 0.01  | 1638  | tags=33%, list=3%, sign |
| GO POSITIV   | GO POSITIVE REGULATI | 54  | 0.66 | 2.255 | 0 | ##### | 0.01  | 6083  | tags=46%, list=10%, sig |
| GO RESPON    | GO RESPONSE TO INTEF | 50  | 0.68 | 2.253 | 0 | ##### | 0.01  | 4625  | tags=36%, list=8%, sign |
| GO I KAPPA   | GO I KAPPAB KINASE N | 282 | 0.55 | 2.251 | 0 | ##### | 0.011 | 4977  | tags=37%, list=9%, sign |
| GO TYPE 2 I  | GO TYPE 2 IMMUNE RES | 39  | 0.69 | 2.246 | 0 | ##### | 0.013 | 3678  | tags=41%, list=6%, sign |
| GO CYTOKI    | GO CYTOKINE PRODUC'  | 102 | 0.63 | 2.246 | 0 | ##### | 0.013 | 2315  | tags=33%, list=4%, sign |
| GO CD4 POS   | GO CD4 POSITIVE ALPH | 78  | 0.67 | 2.247 | 0 | ##### | 0.013 | 3062  | tags=41%, list=5%, sign |
| GO INTERLE   | GO INTERLEUKIN 12 PR | 57  | 0.7  | 2.247 | 0 | ##### | 0.013 | 6386  | tags=49%, list=11%, sig |
| GO POSITIV   | GO POSITIVE REGULATI | 195 | 0.53 | 2.239 | 0 | ##### | 0.015 | 7430  | tags=40%, list=13%, sig |
| GO LATE EN   | GO LATE ENDOSOME M   | 129 | 0.57 | 2.239 | 0 | ##### | 0.015 | 5939  | tags=41%, list=10%, sig |
| GO POSITIV   | GO POSITIVE REGULATI | 147 | 0.54 | 2.24  | 0 | ##### | 0.015 | 7430  | tags=41%, list=13%, sig |
| GO RECYCL    | GO RECYCLING ENDOS(  | 83  | 0.6  | 2.237 | 0 | ##### | 0.015 | 5164  | tags=37%, list=9%, sign |
| GO POSITIV   | GO POSITIVE REGULATI | 274 | 0.62 | 2.242 | 0 | ##### | 0.015 | 3188  | tags=35%, list=5%, sign |
| GO ENDOCY    | GO ENDOCYTIC VESICL  | 160 | 0.62 | 2.236 | 0 | ##### | 0.015 | 4152  | tags=35%, list=7%, sign |
| GO INTERLE   | GO INTERLEUKIN 4 PRO | 35  | 0.77 | 2.233 | 0 | ##### | 0.015 | 2987  | tags=54%, list=5%, sign |
| GO VIRAL R   | GO VIRAL RELEASE FRC | 34  | 0.71 | 2.233 | 0 | ##### | 0.015 | 6065  | tags=47%, list=10%, sig |
| GO T CELL I  | GO T CELL DIFFERENTI | 251 | 0.61 | 2.229 | 0 | ##### | 0.015 | 3678  | tags=37%, list=6%, sign |
| GO REGULA    | GO REGULATION OF TY  | 31  | 0.72 | 2.227 | 0 | ##### | 0.015 | 4795  | tags=48%, list=8%, sign |
| GO DEFENS    | GO DEFENSE RESPONSE  | 90  | 0.62 | 2.227 | 0 | ##### | 0.015 | 8635  | tags=46%, list=15%, sig |
| GO PYRIMII   | GO PYRIMIDINE NUCLE  | 34  | 0.69 | 2.227 | 0 | ##### | 0.015 | 9155  | tags=62%, list=16%, sig |
| GO NEGATI'   | GO NEGATIVE REGULA'  | 258 | 0.54 | 2.216 | 0 | ##### | 0.015 | 4992  | tags=31%, list=9%, sign |
| GO REGULA    | GO REGULATION OF LY  | 489 | 0.61 | 2.219 | 0 | ##### | 0.015 | 5919  | tags=43%, list=10%, sig |
| GO NEGATI'   | GO NEGATIVE REGULA'  | 186 | 0.56 | 2.222 | 0 | ##### | 0.015 | 5416  | tags=33%, list=9%, sign |
| GO TOLL LI   | GO TOLL LIKE RECEPT  | 150 | 0.62 | 2.219 | 0 | ##### | 0.015 | 7299  | tags=49%, list=13%, sig |
| GO MHC PR    | GO MHC PROTEIN BIND  | 36  | 0.88 | 2.22  | 0 | ##### | 0.015 | 1764  | tags=64%, list=3%, sign |
| GO REGULA    | GO REGULATION OF PR  | 26  | 0.75 | 2.214 | 0 | ##### | 0.015 | 1937  | tags=42%, list=3%, sign |
| GO REGULA    | GO REGULATION OF LY  | 179 | 0.61 | 2.211 | 0 | ##### | 0.015 | 3623  | tags=34%, list=6%, sign |
| GO CELLUL    | GO CELLULAR RESPON   | 218 | 0.61 | 2.205 | 0 | ##### | 0.016 | 6064  | tags=41%, list=10%, sig |
| GO POSITIV   | GO POSITIVE REGULATI | 335 | 0.64 | 2.206 | 0 | ##### | 0.016 | 6083  | tags=47%, list=10%, sig |
| GO CYTOKI    | GO CYTOKINE RECEPT   | 260 | 0.57 | 2.209 | 0 | ##### | 0.016 | 6389  | tags=37%, list=11%, sig |
| GO TYPE I II | GO TYPE I INTERFERON | 121 | 0.63 | 2.206 | 0 | ##### | 0.016 | 3678  | tags=35%, list=6%, sign |
| GO NEGATI'   | GO NEGATIVE REGULA'  | 24  | 0.85 | 2.202 | 0 | ##### | 0.018 | 5089  | tags=67%, list=9%, sign |
| GO THREON    | GO THREONINE TYPE EI | 21  | 0.91 | 2.202 | 0 | ##### | 0.018 | 2770  | tags=67%, list=5%, sign |
| GO REGULA    | GO REGULATORY T CEL  | 34  | 0.76 | 2.204 | 0 | ##### | 0.017 | 4152  | tags=47%, list=7%, sign |
| GO POSITIV   | GO POSITIVE REGULATI | 28  | 0.87 | 2.2   | 0 | ##### | 0.018 | 3033  | tags=82%, list=5%, sign |
| GO ALPHA I   | GO ALPHA BETA T CELI | 106 | 0.65 | 2.203 | 0 | ##### | 0.018 | 3062  | tags=37%, list=5%, sign |
| GO PYRIMII   | GO PYRIMIDINE NUCLE  | 23  | 0.74 | 2.19  | 0 | ##### | 0.021 | 10152 | tags=70%, list=17%, sig |
| GO NEGATI'   | GO NEGATIVE REGULA'  | 357 | 0.51 | 2.191 | 0 | ##### | 0.021 | 5947  | tags=30%, list=10%, sig |
| GO REGULA    | GO REGULATION OF AL  | 64  | 0.67 | 2.189 | 0 | ##### | 0.021 | 2916  | tags=36%, list=5%, sign |

|            |                        |     |      |       |   |       |       |      |                         |
|------------|------------------------|-----|------|-------|---|-------|-------|------|-------------------------|
| GO TUMOR   | GO TUMOR NECROSIS F    | 30  | 0.76 | 2.193 | 0 | ##### | 0.02  | 6975 | tags=67%, list=12%, sig |
| GO CELLUL  | GO CELLULAR DEFENSI    | 52  | 0.76 | 2.192 | 0 | ##### | 0.021 | 4317 | tags=56%, list=7%, sign |
| GO POSITIV | GO POSITIVE REGULATI   | 63  | 0.71 | 2.189 | 0 | ##### | 0.021 | 3033 | tags=41%, list=5%, sign |
| GO POSITIV | GO POSITIVE REGULATI   | 26  | 0.83 | 2.194 | 0 | ##### | 0.02  | 3033 | tags=46%, list=5%, sign |
| GO REGULA  | GO REGULATION OF CE    | 430 | 0.56 | 2.188 | 0 | ##### | 0.021 | 5416 | tags=35%, list=9%, sign |
| GO POSITIV | GO POSITIVE REGULATI   | 30  | 0.76 | 2.189 | 0 | ##### | 0.021 | 2916 | tags=43%, list=5%, sign |
| GO REGULA  | GO REGULATION OF CY    | 234 | 0.51 | 2.187 | 0 | ##### | 0.021 | 7829 | tags=38%, list=13%, sig |
| GO NLRP3 I | GO NLRP3 INFLAMMASO    | 16  | 0.77 | 2.187 | 0 | ##### | 0.021 | 2198 | tags=44%, list=4%, sign |
| GO REGULA  | GO REGULATION OF LY    | 56  | 0.65 | 2.187 | 0 | ##### | 0.021 | 3621 | tags=41%, list=6%, sign |
| GO REGULA  | GO REGULATION OF HE    | 464 | 0.53 | 2.184 | 0 | ##### | 0.024 | 6389 | tags=35%, list=11%, sig |
| GO REGULA  | GO REGULATION OF PA'   | 93  | 0.61 | 2.183 | 0 | ##### | 0.025 | 6065 | tags=41%, list=10%, sig |
| GO POSITIV | GO POSITIVE REGULATI   | 56  | 0.68 | 2.183 | 0 | ##### | 0.026 | 2052 | tags=34%, list=4%, sign |
| GO MYELOI  | GO MYELOID DENDRITI    | 29  | 0.79 | 2.183 | 0 | ##### | 0.026 | 3953 | tags=55%, list=7%, sign |
| GO ER TO G | GO ER TO GOLGI TRANS   | 59  | 0.72 | 2.18  | 0 | ##### | 0.027 | 2619 | tags=37%, list=4%, sign |
| GO NADPLU  | GO NADPLUS ADP RIBO    | 24  | 0.71 | 2.181 | 0 | ##### | 0.027 | 3915 | tags=42%, list=7%, sign |
| GO IMMUNI  | GO IMMUNE RECEPTOR     | 132 | 0.68 | 2.181 | 0 | ##### | 0.027 | 4457 | tags=49%, list=8%, sign |
| GO ACTIVA' | GO ACTIVATED T CELL    | 46  | 0.63 | 2.179 | 0 | ##### | 0.028 | 2711 | tags=33%, list=5%, sign |
| GO CELLUL  | GO CELLULAR RESPON     | 240 | 0.59 | 2.175 | 0 | ##### | 0.028 | 6064 | tags=39%, list=10%, sig |
| GO IMMUNI  | GO IMMUNE RESPONSE     | 19  | 0.81 | 2.176 | 0 | ##### | 0.028 | 4639 | tags=68%, list=8%, sign |
| GO POSITIV | GO POSITIVE REGULATI   | 394 | 0.63 | 2.174 | 0 | ##### | 0.029 | 6083 | tags=46%, list=10%, sig |
| GO T HELPE | GO T HELPER 1 TYPE IM  | 44  | 0.73 | 2.177 | 0 | ##### | 0.028 | 3678 | tags=50%, list=6%, sign |
| GO GLYCOS  | GO GLYCOSYL COMPOU     | 41  | 0.65 | 2.176 | 0 | ##### | 0.028 | 9155 | tags=56%, list=16%, sig |
| GO ANTIGE  | GO ANTIGEN PROCESSI    | 24  | 0.91 | 2.168 | 0 | ##### | 0.03  | 856  | tags=58%, list=1%, sign |
| GO POSITIV | GO POSITIVE REGULATI   | 104 | 0.63 | 2.168 | 0 | ##### | 0.03  | 3623 | tags=37%, list=6%, sign |
| GO IMMUN   | GO IMMUNOGLOBULIN      | 21  | 0.8  | 2.167 | 0 | ##### | 0.03  | 2354 | tags=43%, list=4%, sign |
| GO MHC CL  | GO MHC CLASS I PROTE   | 19  | 0.88 | 2.17  | 0 | ##### | 0.03  | 1536 | tags=58%, list=3%, sign |
| GO MHC PR  | GO MHC PROTEIN COMI    | 24  | 0.88 | 2.169 | 0 | ##### | 0.03  | 1586 | tags=67%, list=3%, sign |
| GO PRODUC  | GO PRODUCTION OF MC    | 296 | 0.64 | 2.168 | 0 | ##### | 0.03  | 6737 | tags=48%, list=12%, sig |
| GO INTERLE | GO INTERLEUKIN 1 PRO   | 117 | 0.62 | 2.165 | 0 | ##### | 0.032 | 5216 | tags=42%, list=9%, sign |
| GO POSITIV | GO POSITIVE REGULATI   | 71  | 0.61 | 2.161 | 0 | ##### | 0.033 | 3273 | tags=30%, list=6%, sign |
| GO POSITIV | GO POSITIVE REGULATI   | 57  | 0.72 | 2.16  | 0 | ##### | 0.034 | 5926 | tags=58%, list=10%, sig |
| GO NEGATI' | GO NEGATIVE REGULA'    | 17  | 0.89 | 2.161 | 0 | ##### | 0.033 | 4639 | tags=82%, list=8%, sign |
| GO INTERLE | GO INTERLEUKIN 1 BET   | 103 | 0.63 | 2.162 | 0 | ##### | 0.032 | 5216 | tags=43%, list=9%, sign |
| GO PEPTIDE | GO PEPTIDE ANTIGEN B   | 30  | 0.94 | 2.159 | 0 | ##### | 0.034 | 1461 | tags=70%, list=3%, sign |
| GO SCF DEP | GO SCF DEPENDENT PR    | 91  | 0.64 | 2.159 | 0 | ##### | 0.034 | 3078 | tags=32%, list=5%, sign |
| GO CELLUL  | GO CELLULAR RESPON     | 60  | 0.62 | 2.157 | 0 | ##### | 0.038 | 4792 | tags=35%, list=8%, sign |
| GO CELLUL  | GO CELLULAR METABO     | 32  | 0.66 | 2.157 | 0 | ##### | 0.038 | 8789 | tags=56%, list=15%, sig |
| GO T HELPE | GO T HELPER 17 TYPE II | 31  | 0.74 | 2.156 | 0 | ##### | 0.04  | 2916 | tags=45%, list=5%, sign |
| GO REGULA  | GO REGULATION OF LE    | 287 | 0.56 | 2.155 | 0 | ##### | 0.044 | 6389 | tags=38%, list=11%, sig |
| GO POSITIV | GO POSITIVE REGULATI   | 23  | 0.88 | 2.153 | 0 | ##### | 0.044 | 3033 | tags=83%, list=5%, sign |
| GO POSITIV | GO POSITIVE REGULATI   | 36  | 0.73 | 2.152 | 0 | ##### | 0.045 | 2916 | tags=42%, list=5%, sign |
| GO REGULA  | GO REGULATION OF T F   | 36  | 0.71 | 2.15  | 0 | ##### | 0.046 | 2916 | tags=39%, list=5%, sign |
| GO LUMEN/  | GO LUMENAL SIDE OF E   | 27  | 0.9  | 2.15  | 0 | ##### | 0.046 | 2478 | tags=70%, list=4%, sign |
| GO POSITIV | GO POSITIVE T CELL SE  | 36  | 0.81 | 2.15  | 0 | ##### | 0.046 | 4279 | tags=64%, list=7%, sign |
| GO RESPON  | GO RESPONSE TO TUMOR   | 25  | 0.72 | 2.146 | 0 | ##### | 0.051 | 4639 | tags=56%, list=8%, sign |
| GO CYSTEIN | GO CYSTEINE TYPE ENI   | 15  | 0.84 | 2.147 | 0 | ##### | 0.051 | 597  | tags=53%, list=1%, sign |
| GO NEGATI' | GO NEGATIVE REGULA'    | 22  | 0.75 | 2.147 | 0 | ##### | 0.051 | 5143 | tags=50%, list=9%, sign |
| GO REGULA  | GO REGULATION OF TR    | 75  | 0.66 | 2.144 | 0 | ##### | 0.053 | 6103 | tags=43%, list=10%, sig |
| GO DEFENS  | GO DEFENSE RESPONSE    | 318 | 0.6  | 2.14  | 0 | ##### | 0.058 | 8773 | tags=48%, list=15%, sig |
| GO POSITIV | GO POSITIVE REGULATI   | 24  | 0.81 | 2.141 | 0 | ##### | 0.058 | 2512 | tags=63%, list=4%, sign |
| GO INTERFE | GO INTERFERON BETA I   | 49  | 0.65 | 2.138 | 0 | ##### | 0.06  | 3254 | tags=37%, list=6%, sign |
| GO LYMPHC  | GO LYMPHOCYTE COST     | 58  | 0.7  | 2.136 | 0 | ##### | 0.062 | 2552 | tags=43%, list=4%, sign |
| GO POSITIV | GO POSITIVE REGULATI   | 158 | 0.59 | 2.136 | 0 | ##### | 0.063 | 5416 | tags=37%, list=9%, sign |
| GO PROTEA  | GO PROTEASOMAL UBI     | 22  | 0.86 | 2.134 | 0 | ##### | 0.065 | 2770 | tags=64%, list=5%, sign |
| GO TOLERA  | GO TOLERANCE INDUC'    | 24  | 0.85 | 2.135 | 0 | ##### | 0.065 | 937  | tags=54%, list=2%, sign |
| GO VIRAL G | GO VIRAL GENOME REF    | 121 | 0.6  | 2.133 | 0 | ##### | 0.065 | 3263 | tags=31%, list=6%, sign |
| GO CELLUL  | GO CELLULAR RESPON     | 20  | 0.77 | 2.133 | 0 | ##### | 0.068 | 2122 | tags=55%, list=4%, sign |
| GO POSITIV | GO POSITIVE REGULATI   | 92  | 0.65 | 2.132 | 0 | ##### | 0.068 | 4795 | tags=43%, list=8%, sign |

|                                  |     |      |       |   |        |       |      |                         |
|----------------------------------|-----|------|-------|---|--------|-------|------|-------------------------|
| GO NEGATI'GO NEGATIVE REGULA'    | 30  | 0.68 | 2.13  | 0 | #####  | 0.069 | 2916 | tags=33%, list=5%, sign |
| GO REGULA GO REGULATION OF CD    | 17  | 0.83 | 2.13  | 0 | #####  | 0.069 | 2916 | tags=59%, list=5%, sign |
| GO REGULA GO REGULATION OF TO    | 72  | 0.63 | 2.129 | 0 | #####  | 0.069 | 7299 | tags=47%, list=13%, sig |
| GO T CELL I GO T CELL RECEPTOR C | 125 | 0.87 | 2.13  | 0 | #####  | 0.069 | 3220 | tags=77%, list=6%, sign |
| GO FC RECE GO FC RECEPTOR SIGNA  | 239 | 0.63 | 2.128 | 0 | #####  | 0.069 | 6131 | tags=45%, list=11%, sig |
| GO MOVEM GO MOVEMENT IN HOS'     | 165 | 0.54 | 2.128 | 0 | #####  | 0.069 | 7367 | tags=38%, list=13%, sig |
| GO RESPON GO RESPONSE TO MOLE    | 348 | 0.54 | 2.126 | 0 | #####  | 0.07  | 6161 | tags=36%, list=11%, sig |
| GO TUMOR GO TUMOR NECROSIS F     | 178 | 0.58 | 2.123 | 0 | #####  | 0.071 | 4795 | tags=36%, list=8%, sign |
| GO RESPON GO RESPONSE TO INTEF   | 20  | 0.81 | 2.122 | 0 | #####  | 0.074 | 1015 | tags=50%, list=2%, sign |
| GO NEGATI'GO NEGATIVE REGULA'    | 20  | 0.87 | 2.121 | 0 | #####  | 0.077 | 4639 | tags=75%, list=8%, sign |
| GO REGULA GO REGULATION OF T C   | 34  | 0.67 | 2.121 | 0 | #####  | 0.077 | 3621 | tags=47%, list=6%, sign |
| GO POSITIV GO POSITIVE REGULATI  | 20  | 0.74 | 2.119 | 0 | #####  | 0.081 | 2050 | tags=40%, list=4%, sign |
| GO NEGATI'GO NEGATIVE REGULA'    | 36  | 0.65 | 2.118 | 0 | #####  | 0.082 | 5890 | tags=42%, list=10%, sig |
| GO POSITIV GO POSITIVE REGULATI  | 35  | 0.68 | 2.119 | 0 | #####  | 0.081 | 5926 | tags=51%, list=10%, sig |
| GO NUCLEC GO NUCLEOSIDE SALVA    | 15  | 0.8  | 2.117 | 0 | #####  | 0.082 | 8789 | tags=73%, list=15%, sig |
| GO INTERA( GO INTERACTION WITH   | 208 | 0.53 | 2.117 | 0 | #####  | 0.082 | 7367 | tags=37%, list=13%, sig |
| GO FC EPSII GO FC EPSILON RECEPT | 168 | 0.66 | 2.116 | 0 | #####  | 0.084 | 7851 | tags=52%, list=13%, sig |
| GO NEGATI'GO NEGATIVE REGULA'    | 89  | 0.55 | 2.113 | 0 | #####  | 0.085 | 7080 | tags=43%, list=12%, sig |
| GO LEUKOC GO LEUKOCYTE APOPT'    | 107 | 0.58 | 2.113 | 0 | #####  | 0.085 | 5081 | tags=38%, list=9%, sign |
| GO CD8 POS GO CD8 POSITIVE ALPH  | 26  | 0.77 | 2.108 | 0 | #####  | 0.089 | 2916 | tags=46%, list=5%, sign |
| GO REGULA GO REGULATION OF NE    | 38  | 0.61 | 2.106 | 0 | #####  | 0.09  | 1937 | tags=29%, list=3%, sign |
| GO TERTIAF GO TERTIARY GRANULI   | 55  | 0.62 | 2.107 | 0 | #####  | 0.09  | 4842 | tags=44%, list=8%, sign |
| GO NUCLEC GO NUCLEOBASE CONT     | 48  | 0.59 | 2.103 | 0 | 0.001  | 0.091 | 9289 | tags=52%, list=16%, sig |
| GO POSITIV GO POSITIVE REGULATI  | 152 | 0.56 | 2.103 | 0 | 0.001  | 0.091 | 6027 | tags=38%, list=10%, sig |
| GO REGULA GO REGULATION OF IMI   | 61  | 0.62 | 2.103 | 0 | 0.001  | 0.091 | 5890 | tags=41%, list=10%, sig |
| GO T CELL S GO T CELL SELECTION  | 49  | 0.74 | 2.1   | 0 | 0.001  | 0.096 | 7430 | tags=67%, list=13%, sig |
| GO NEGATI'GO NEGATIVE REGULA'    | 31  | 0.64 | 2.1   | 0 | 0.001  | 0.096 | 3621 | tags=42%, list=6%, sign |
| GO INTRINS GO INTRINSIC COMPON   | 154 | 0.57 | 2.099 | 0 | 0.0011 | 0.098 | 5351 | tags=31%, list=9%, sign |
| GO B CELL I GO B CELL MEDIATED I | 210 | 0.72 | 2.097 | 0 | 0.0011 | 0.102 | 7314 | tags=60%, list=13%, sig |
| GO NEGATI'GO NEGATIVE REGULA'    | 36  | 0.66 | 2.095 | 0 | 0.0011 | 0.102 | 8426 | tags=56%, list=14%, sig |
| GO REGULA GO REGULATION OF CY    | 17  | 0.75 | 2.094 | 0 | 0.0011 | 0.104 | 2630 | tags=41%, list=5%, sign |
| GO PLASMA GO PLASMA MEMBRAN      | 291 | 0.64 | 2.095 | 0 | 0.0011 | 0.103 | 3254 | tags=44%, list=6%, sign |
| GO TYROSI GO TYROSINE PHOSPHC    | 89  | 0.58 | 2.092 | 0 | 0.0011 | 0.109 | 3273 | tags=28%, list=6%, sign |
| GO POSITIV GO POSITIVE REGULATI  | 68  | 0.66 | 2.089 | 0 | 0.0011 | 0.112 | 5307 | tags=46%, list=9%, sign |
| GO NEGATI'GO NEGATIVE REGULA'    | 19  | 0.79 | 2.089 | 0 | 0.0012 | 0.114 | 5785 | tags=63%, list=10%, sig |
| GO REGULA GO REGULATION OF B C   | 49  | 0.65 | 2.088 | 0 | 0.0012 | 0.115 | 7243 | tags=49%, list=12%, sig |
| GO CHEMOI GO CHEMOKINE RECEPT    | 63  | 0.69 | 2.082 | 0 | 0.0013 | 0.126 | 4110 | tags=40%, list=7%, sign |
| GO VIRAL L GO VIRAL LIFE CYCLE   | 330 | 0.53 | 2.081 | 0 | 0.0013 | 0.127 | 6485 | tags=34%, list=11%, sig |
| GO LYMPHC GO LYMPHOCYTE CHEM     | 63  | 0.67 | 2.08  | 0 | 0.0013 | 0.127 | 4110 | tags=46%, list=7%, sign |
| GO POSITIV GO POSITIVE REGULATI  | 18  | 0.81 | 2.078 | 0 | 0.0013 | 0.127 | 6605 | tags=67%, list=11%, sig |
| GO ENDOPE GO ENDOPEPTIDASE CC    | 68  | 0.72 | 2.074 | 0 | 0.0014 | 0.134 | 3994 | tags=38%, list=7%, sign |
| GO CYTOPL GO CYTOPLASMIC PATI    | 63  | 0.59 | 2.074 | 0 | 0.0014 | 0.134 | 7270 | tags=43%, list=12%, sig |
| GO REGULA GO REGULATION OF AN    | 67  | 0.68 | 2.073 | 0 | 0.0014 | 0.137 | 5319 | tags=43%, list=9%, sign |
| GO INFLAM GO INFLAMMASOME CC     | 16  | 0.81 | 2.073 | 0 | 0.0014 | 0.135 | 2238 | tags=50%, list=4%, sign |
| GO IMMUN GO IMMUNOGLOBULIN       | 202 | 0.66 | 2.072 | 0 | 0.0014 | 0.137 | 6737 | tags=51%, list=12%, sig |
| GO POSITIV GO POSITIVE REGULATI  | 39  | 0.64 | 2.073 | 0 | 0.0014 | 0.137 | 4039 | tags=41%, list=7%, sign |
| GO ZYMOGI GO ZYMOGEN ACTIVAT     | 55  | 0.63 | 2.07  | 0 | 0.0015 | 0.143 | 8621 | tags=45%, list=15%, sig |
| GO REGULA GO REGULATION OF DN    | 111 | 0.6  | 2.069 | 0 | 0.0015 | 0.147 | 7705 | tags=42%, list=13%, sig |
| GO REGULA GO REGULATION OF HY    | 20  | 0.64 | 2.066 | 0 | 0.0015 | 0.15  | 7462 | tags=50%, list=13%, sig |
| GO REGULA GO REGULATION OF T F   | 22  | 0.73 | 2.065 | 0 | 0.0015 | 0.15  | 2916 | tags=41%, list=5%, sign |
| GO HUMOR GO HUMORAL IMMUNE       | 352 | 0.62 | 2.065 | 0 | 0.0016 | 0.15  | 8001 | tags=48%, list=14%, sig |
| GO T CELL I GO T CELL HOMEOSTAS  | 38  | 0.65 | 2.064 | 0 | 0.0016 | 0.154 | 6691 | tags=55%, list=11%, sig |
| GO POSITIV GO POSITIVE REGULATI  | 16  | 0.77 | 2.063 | 0 | 0.0016 | 0.156 | 2043 | tags=50%, list=3%, sign |
| GO LYMPHC GO LYMPHOCYTE DIFFI    | 364 | 0.55 | 2.062 | 0 | 0.0016 | 0.158 | 4279 | tags=32%, list=7%, sign |
| GO CD4 POS GO CD4 POSITIVE ALPH  | 23  | 0.69 | 2.063 | 0 | 0.0016 | 0.158 | 3033 | tags=39%, list=5%, sign |
| GO TOLL LI GO TOLL LIKE RECEPTC  | 20  | 0.74 | 2.061 | 0 | 0.0016 | 0.159 | 7273 | tags=70%, list=12%, sig |
| GO ENTRY I GO ENTRY INTO HOST    | 143 | 0.54 | 2.056 | 0 | 0.0018 | 0.168 | 7367 | tags=38%, list=13%, sig |
| GO RIBONU GO RIBONUCLEOSIDE C    | 21  | 0.7  | 2.055 | 0 | 0.0018 | 0.169 | 8764 | tags=57%, list=15%, sig |

|             |                       |     |      |       |   |        |       |       |                         |
|-------------|-----------------------|-----|------|-------|---|--------|-------|-------|-------------------------|
| GO PROTEA   | GO PROTEASOME CORE    | 20  | 0.89 | 2.052 | 0 | 0.0018 | 0.172 | 2770  | tags=70%, list=5%, sign |
| GO POSITIV  | GO POSITIVE REGULATI  | 37  | 0.65 | 2.049 | 0 | 0.0019 | 0.184 | 6795  | tags=49%, list=12%, sig |
| GO CLATHR   | GO CLATHRIN COATED    | 57  | 0.62 | 2.048 | 0 | 0.0019 | 0.187 | 3159  | tags=32%, list=5%, sign |
| GO INTERLE  | GO INTERLEUKIN 8 PRO  | 101 | 0.54 | 2.047 | 0 | 0.002  | 0.19  | 6083  | tags=35%, list=10%, sig |
| GO CYTOKI   | GO CYTOKINE SECRETI   | 128 | 0.58 | 2.04  | 0 | 0.0021 | 0.202 | 5312  | tags=41%, list=9%, sign |
| GO POSITIV  | GO POSITIVE REGULATI  | 42  | 0.62 | 2.036 | 0 | 0.0022 | 0.208 | 1939  | tags=31%, list=3%, sign |
| GO NEGATI'  | GO NEGATIVE REGULA'   | 48  | 0.61 | 2.036 | 0 | 0.0022 | 0.209 | 6299  | tags=48%, list=11%, sig |
| GO POSITIV  | GO POSITIVE REGULATI  | 37  | 0.67 | 2.037 | 0 | 0.0022 | 0.208 | 5312  | tags=46%, list=9%, sign |
| GO T CELL I | GO T CELL LINEAGE CO  | 28  | 0.7  | 2.034 | 0 | 0.0023 | 0.218 | 7430  | tags=64%, list=13%, sig |
| GO NEGATI'  | GO NEGATIVE REGULA'   | 18  | 0.75 | 2.034 | 0 | 0.0023 | 0.218 | 1638  | tags=33%, list=3%, sign |
| GO ACTIVA'  | GO ACTIVATION OF CY'  | 15  | 0.76 | 2.031 | 0 | 0.0023 | 0.222 | 7263  | tags=60%, list=12%, sig |
| GO REGULA   | GO REGULATION OF RE   | 16  | 0.75 | 2.03  | 0 | 0.0024 | 0.224 | 6665  | tags=63%, list=11%, sig |
| GO MYELOI   | GO MYELOID DENDRITI   | 18  | 0.75 | 2.028 | 0 | 0.0024 | 0.229 | 3897  | tags=50%, list=7%, sign |
| GO ANAPH'   | GO ANAPHASE PROMOT    | 82  | 0.69 | 2.025 | 0 | 0.0025 | 0.236 | 7798  | tags=48%, list=13%, sig |
| GO ENDOSC   | GO ENDOSOME MEMBR     | 484 | 0.48 | 2.025 | 0 | 0.0025 | 0.236 | 4686  | tags=29%, list=8%, sign |
| GO ANTIGE'  | GO ANTIGEN BINDING    | 152 | 0.8  | 2.023 | 0 | 0.0025 | 0.237 | 6303  | tags=64%, list=11%, sig |
| GO INTERLE  | GO INTERLEUKIN 6 PRO  | 165 | 0.56 | 2.024 | 0 | 0.0025 | 0.237 | 6299  | tags=38%, list=11%, sig |
| GO EOSINOI  | GO EOSINOPHIL MIGRA'  | 22  | 0.79 | 2.024 | 0 | 0.0025 | 0.237 | 3400  | tags=50%, list=6%, sign |
| GO NEGATI'  | GO NEGATIVE REGULA'   | 18  | 0.78 | 2.022 | 0 | 0.0025 | 0.239 | 1718  | tags=33%, list=3%, sign |
| GO PEPTIDE  | GO PEPTIDE TRANSMEN   | 30  | 0.64 | 2.022 | 0 | 0.0025 | 0.239 | 2875  | tags=23%, list=5%, sign |
| GO T HELPE  | GO T HELPER 2 CELL DI | 15  | 0.72 | 2.022 | 0 | 0.0025 | 0.239 | 2043  | tags=40%, list=3%, sign |
| GO REGULA   | GO REGULATION OF LE'  | 85  | 0.58 | 2.02  | 0 | 0.0026 | 0.247 | 3621  | tags=35%, list=6%, sign |
| GO EXTRIN'  | GO EXTRINSIC APOPTO'  | 226 | 0.49 | 2.018 | 0 | 0.0026 | 0.25  | 6800  | tags=35%, list=12%, sig |
| GO POSITIV  | GO POSITIVE REGULATI  | 202 | 0.53 | 2.015 | 0 | 0.0028 | 0.256 | 5416  | tags=33%, list=9%, sign |
| GO CYTOPL   | GO CYTOPLASMIC PATI   | 28  | 0.65 | 2.012 | 0 | 0.0028 | 0.262 | 7270  | tags=46%, list=12%, sig |
| GO MHC CL   | GO MHC CLASS II PROTI | 16  | 0.86 | 2.011 | 0 | 0.0029 | 0.266 | 3139  | tags=63%, list=5%, sign |
| GO I KAPPA  | GO I KAPPAB PHOSPHO   | 20  | 0.72 | 2.009 | 0 | 0.0029 | 0.27  | 6845  | tags=55%, list=12%, sig |
| GO REGULA   | GO REGULATION OF TO   | 16  | 0.84 | 2.008 | 0 | 0.003  | 0.273 | 937   | tags=56%, list=2%, sign |
| GO CHEMOI   | GO CHEMOKINE ACTIVI   | 47  | 0.72 | 2.007 | 0 | 0.003  | 0.273 | 4110  | tags=45%, list=7%, sign |
| GO REGULA   | GO REGULATION OF INI  | 412 | 0.48 | 2.005 | 0 | 0.0031 | 0.276 | 5619  | tags=32%, list=10%, sig |
| GO NEGATI'  | GO NEGATIVE REGULA'   | 52  | 0.58 | 2.005 | 0 | 0.0031 | 0.276 | 4374  | tags=38%, list=7%, sign |
| GO REGULA   | GO REGULATION OF B C  | 176 | 0.65 | 2.004 | 0 | 0.0031 | 0.278 | 7877  | tags=54%, list=13%, sig |
| GO REGULA   | GO REGULATION OF NII  | 116 | 0.53 | 2.003 | 0 | 0.0032 | 0.279 | 4938  | tags=34%, list=8%, sign |
| GO EOSINOI  | GO EOSINOPHIL CHEMC   | 18  | 0.84 | 2     | 0 | 0.0032 | 0.286 | 3400  | tags=50%, list=6%, sign |
| GO REGULA   | GO REGULATION OF SY   | 28  | 0.72 | 1.997 | 0 | 0.0034 | 0.294 | 3679  | tags=43%, list=6%, sign |
| GO NEGATI'  | GO NEGATIVE REGULA'   | 15  | 0.73 | 1.995 | 0 | 0.0035 | 0.303 | 4795  | tags=40%, list=8%, sign |
| GO RECEPT   | GO RECEPTOR SIGNALII  | 174 | 0.5  | 1.994 | 0 | 0.0035 | 0.305 | 4938  | tags=28%, list=8%, sign |
| GO ANTIMIK  | GO ANTIMICROBIAL HU   | 66  | 0.63 | 1.993 | 0 | 0.0035 | 0.309 | 8971  | tags=50%, list=15%, sig |
| GO CELLUL   | GO CELLULAR RESPON'   | 20  | 0.7  | 1.992 | 0 | 0.0035 | 0.312 | 3698  | tags=45%, list=6%, sign |
| GO REGULA   | GO REGULATION OF MY   | 20  | 0.74 | 1.99  | 0 | 0.0036 | 0.316 | 3679  | tags=45%, list=6%, sign |
| GO ANTIGE'  | GO ANTIGEN PROCESSII  | 17  | 0.94 | 1.988 | 0 | 0.0037 | 0.326 | 856   | tags=76%, list=1%, sign |
| GO REGULA   | GO REGULATION OF PEI  | 450 | 0.46 | 1.985 | 0 | 0.0038 | 0.329 | 7829  | tags=34%, list=13%, sig |
| GO NATURA   | GO NATURAL KILLER C'  | 31  | 0.64 | 1.983 | 0 | 0.0039 | 0.331 | 3951  | tags=35%, list=7%, sign |
| GO NEGATI'  | GO NEGATIVE REGULA'   | 25  | 0.66 | 1.98  | 0 | 0.004  | 0.338 | 2916  | tags=32%, list=5%, sign |
| GO PRODUC   | GO PRODUCTION OF MC   | 90  | 0.53 | 1.977 | 0 | 0.0041 | 0.344 | 6027  | tags=38%, list=10%, sig |
| GO POSITIV  | GO POSITIVE REGULATI  | 18  | 0.72 | 1.977 | 0 | 0.0041 | 0.347 | 3340  | tags=50%, list=6%, sign |
| GO POSITIV  | GO POSITIVE REGULATI  | 21  | 0.8  | 1.972 | 0 | 0.0043 | 0.36  | 2361  | tags=48%, list=4%, sign |
| GO AMINE M  | GO AMINE METABOLIC    | 138 | 0.51 | 1.972 | 0 | 0.0044 | 0.36  | 6782  | tags=33%, list=12%, sig |
| GO POSITIV  | GO POSITIVE REGULATI  | 356 | 0.45 | 1.97  | 0 | 0.0044 | 0.365 | 7430  | tags=34%, list=13%, sig |
| GO TOLL LI  | GO TOLL LIKE RECEPTC  | 25  | 0.67 | 1.967 | 0 | 0.0045 | 0.367 | 3930  | tags=40%, list=7%, sign |
| GO NEGATI'  | GO NEGATIVE REGULA'   | 21  | 0.69 | 1.963 | 0 | 0.0047 | 0.378 | 5947  | tags=38%, list=10%, sig |
| GO CHEMOI   | GO CHEMOKINE C X C M  | 15  | 0.7  | 1.963 | 0 | 0.0047 | 0.378 | 7614  | tags=47%, list=13%, sig |
| GO POSITIV  | GO POSITIVE REGULATI  | 93  | 0.55 | 1.959 | 0 | 0.0049 | 0.384 | 4938  | tags=32%, list=8%, sign |
| GO ANTIMIK  | GO ANTIMICROBIAL HU   | 125 | 0.56 | 1.957 | 0 | 0.0049 | 0.386 | 10480 | tags=46%, list=18%, sig |
| GO NEGATI'  | GO NEGATIVE REGULA'   | 19  | 0.7  | 1.955 | 0 | 0.005  | 0.391 | 6083  | tags=63%, list=10%, sig |
| GO HUMOR.   | GO HUMORAL IMMUNE     | 142 | 0.76 | 1.953 | 0 | 0.0051 | 0.397 | 7872  | tags=66%, list=13%, sig |
| GO POSITIV  | GO POSITIVE REGULATI  | 71  | 0.56 | 1.951 | 0 | 0.0052 | 0.4   | 6196  | tags=41%, list=11%, sig |
| GO ENDOCY   | GO ENDOCYTIC VESICL   | 308 | 0.49 | 1.947 | 0 | 0.0054 | 0.415 | 4795  | tags=30%, list=8%, sign |

|            |                       |     |      |       |       |        |       |      |                         |
|------------|-----------------------|-----|------|-------|-------|--------|-------|------|-------------------------|
| GO MHC PR  | GO MHC PROTEIN COMI   | 23  | 0.96 | 1.947 | 0     | 0.0054 | 0.415 | 1500 | tags=96%, list=3%, sign |
| GO CYTOKI  | GO CYTOKINE PRODUC    | 67  | 0.55 | 1.945 | 0     | 0.0055 | 0.419 | 5216 | tags=36%, list=9%, sign |
| GO ACTIVA  | GO ACTIVATION OF NF   | 17  | 0.71 | 1.946 | 0     | 0.0055 | 0.419 | 3003 | tags=41%, list=5%, sign |
| GO POSITIV | GO POSITIVE REGULATI  | 177 | 0.46 | 1.941 | 0     | 0.0057 | 0.428 | 7615 | tags=39%, list=13%, sig |
| GO FICOLIN | GO FICOLIN 1 RICH GRA | 124 | 0.53 | 1.933 | 0     | 0.0062 | 0.45  | 4842 | tags=38%, list=8%, sign |
| GO POSITIV | GO POSITIVE REGULATI  | 267 | 0.48 | 1.933 | 0     | 0.0062 | 0.452 | 7243 | tags=39%, list=12%, sig |
| GO ACTIVA  | GO ACTIVATION OF JAN  | 15  | 0.74 | 1.933 | 0     | 0.0062 | 0.452 | 3483 | tags=47%, list=6%, sign |
| GO RESPON  | GO RESPONSE TO INTEF  | 35  | 0.58 | 1.929 | 0     | 0.0065 | 0.462 | 3678 | tags=31%, list=6%, sign |
| GO EARLY I | GO EARLY ENDOSOME I   | 152 | 0.5  | 1.924 | 0     | 0.0068 | 0.479 | 3740 | tags=23%, list=6%, sign |
| GO B CELL  | GO B CELL APOPTOTIC I | 26  | 0.61 | 1.921 | 0     | 0.0069 | 0.486 | 2630 | tags=31%, list=5%, sign |
| GO DEOXYF  | GO DEOXYRIBONUCLEO    | 15  | 0.75 | 1.91  | 0     | 0.0078 | 0.508 | 7852 | tags=60%, list=13%, sig |
| GO KILLING | GO KILLING OF CELLS C | 63  | 0.57 | 1.901 | 0     | 0.0085 | 0.535 | 8971 | tags=46%, list=15%, sig |
| GO LATE EN | GO LATE ENDOSOME      | 263 | 0.45 | 1.886 | 0     | 0.0097 | 0.571 | 5939 | tags=30%, list=10%, sig |
| GO NEGATI  | GO NEGATIVE REGULA    | 83  | 0.47 | 1.886 | 0     | 0.0097 | 0.571 | 7662 | tags=34%, list=13%, sig |
| GO REGULA  | GO REGULATION OF MY   | 122 | 0.5  | 1.873 | 0     | 0.0111 | 0.616 | 6389 | tags=34%, list=11%, sig |
| GO HYDROI  | GO HYDROLASE ACTIVI   | 34  | 0.57 | 1.87  | 0     | 0.0113 | 0.622 | 4524 | tags=35%, list=8%, sign |
| GO REGULA  | GO REGULATION OF DN   | 444 | 0.43 | 1.862 | 0     | 0.0125 | 0.643 | 7243 | tags=34%, list=12%, sig |
| GO CYSTEIN | GO CYSTEINE TYPE ENI  | 41  | 0.55 | 1.859 | 0     | 0.0127 | 0.651 | 6860 | tags=39%, list=12%, sig |
| GO REGULA  | GO REGULATION OF RE   | 151 | 0.46 | 1.856 | 0     | 0.0131 | 0.662 | 4938 | tags=27%, list=8%, sign |
| GO PEPTIDA | GO PEPTIDASE ACTIVA   | 18  | 0.6  | 1.842 | 0     | 0.0148 | 0.698 | 5115 | tags=44%, list=9%, sign |
| GO DEAMIN  | GO DEAMINASE ACTIVI   | 30  | 0.58 | 1.841 | 0     | 0.015  | 0.702 | 4524 | tags=37%, list=8%, sign |
| GO NEGATI  | GO NEGATIVE REGULA    | 92  | 0.48 | 1.839 | 0     | 0.0152 | 0.703 | 7829 | tags=34%, list=13%, sig |
| GO CELLUL  | GO CELLULAR KETONE    | 253 | 0.44 | 1.839 | 0     | 0.0152 | 0.705 | 6795 | tags=32%, list=12%, sig |
| GO POSITIV | GO POSITIVE REGULATI  | 26  | 0.57 | 1.836 | 0     | 0.0155 | 0.712 | 6083 | tags=35%, list=10%, sig |
| GO CYSTEIN | GO CYSTEINE TYPE PEP  | 137 | 0.48 | 1.835 | 0     | 0.0155 | 0.713 | 6375 | tags=28%, list=11%, sig |
| GO PEPTIDE | GO PEPTIDE BINDING    | 299 | 0.44 | 1.835 | 0     | 0.0156 | 0.715 | 4903 | tags=25%, list=8%, sign |
| GO VESICLE | GO VESICLE LUMEN      | 322 | 0.46 | 1.828 | 0     | 0.0164 | 0.723 | 6500 | tags=34%, list=11%, sig |
| GO REGULA  | GO REGULATION OF CE   | 187 | 0.45 | 1.826 | 0     | 0.0165 | 0.728 | 6795 | tags=30%, list=12%, sig |
| GO INTRINS | GO INTRINSIC COMPON   | 377 | 0.44 | 1.821 | 0     | 0.0172 | 0.739 | 6323 | tags=28%, list=11%, sig |
| GO RECYCL  | GO RECYCLING ENDOSO   | 180 | 0.44 | 1.812 | 0     | 0.0187 | 0.762 | 6267 | tags=31%, list=11%, sig |
| GO MULTIV  | GO MULTIVESICULAR B   | 59  | 0.49 | 1.771 | 0     | 0.0261 | 0.845 | 4279 | tags=29%, list=7%, sign |
| GO ENDOPE  | GO ENDOPEPTIDASE AC   | 430 | 0.39 | 1.733 | 0     | 0.0347 | 0.904 | 6588 | tags=26%, list=11%, sig |
| GO NAD BIC | GO NAD BIOSYNTHETIC   | 27  | 0.51 | 1.645 | 0     | 0.0614 | 0.979 | 4542 | tags=30%, list=8%, sign |
| GO REGULA  | GO REGULATION OF HU   | 132 | 0.67 | 1.899 | 0.002 | 0.0087 | 0.541 | 7314 | tags=55%, list=13%, sig |
| GO PHAGOC  | GO PHAGOCYTOSIS       | 362 | 0.58 | 1.958 | 0.002 | 0.0049 | 0.385 | 6328 | tags=44%, list=11%, sig |
| GO NEUTRO  | GO NEUTROPHIL CHEMO   | 98  | 0.61 | 1.981 | 0.002 | 0.004  | 0.335 | 6161 | tags=42%, list=11%, sig |
| GO POSITIV | GO POSITIVE REGULATI  | 132 | 0.65 | 1.892 | 0.002 | 0.0093 | 0.559 | 7877 | tags=56%, list=13%, sig |
| GO POSITIV | GO POSITIVE REGULATI  | 33  | 0.64 | 1.898 | 0.002 | 0.0087 | 0.546 | 5416 | tags=45%, list=9%, sign |
| GO DENDRI  | GO DENDRITIC CELL DI  | 44  | 0.7  | 2.098 | 0.002 | 0.0011 | 0.1   | 6299 | tags=55%, list=11%, sig |
| GO CD4 POS | GO CD4 POSITIVE OR CI | 22  | 0.75 | 2.012 | 0.002 | 0.0028 | 0.261 | 7133 | tags=68%, list=12%, sig |
| GO POSITIV | GO POSITIVE REGULATI  | 221 | 0.44 | 1.848 | 0.002 | 0.0141 | 0.681 | 5820 | tags=29%, list=10%, sig |
| GO NEGATI  | GO NEGATIVE REGULA    | 23  | 0.64 | 1.968 | 0.002 | 0.0044 | 0.366 | 5319 | tags=48%, list=9%, sign |
| GO POSITIV | GO POSITIVE REGULATI  | 16  | 0.72 | 1.836 | 0.002 | 0.0154 | 0.71  | 5045 | tags=44%, list=9%, sign |
| GO FC RECE | GO FC RECEPTOR MEDI   | 143 | 0.64 | 1.898 | 0.002 | 0.0087 | 0.545 | 6719 | tags=52%, list=12%, sig |
| GO NEUTRO  | GO NEUTROPHIL MIGRA   | 117 | 0.61 | 1.996 | 0.002 | 0.0034 | 0.299 | 5820 | tags=43%, list=10%, sig |
| GO PROTEIN | GO PROTEIN ADP RIBOS  | 16  | 0.76 | 1.979 | 0.002 | 0.004  | 0.339 | 3915 | tags=50%, list=7%, sign |
| GO REGULA  | GO REGULATION OF MC   | 22  | 0.71 | 2.037 | 0.002 | 0.0022 | 0.208 | 2052 | tags=32%, list=4%, sign |
| GO COPII C | GO COPII COATED ER T  | 91  | 0.62 | 2.018 | 0.002 | 0.0026 | 0.25  | 4459 | tags=34%, list=8%, sign |
| GO NEGATI  | GO NEGATIVE REGULA    | 22  | 0.68 | 2.012 | 0.002 | 0.0028 | 0.263 | 725  | tags=27%, list=1%, sign |
| GO CYTOKI  | GO CYTOKINE ACTIVIT   | 232 | 0.49 | 1.848 | 0.002 | 0.0141 | 0.681 | 6195 | tags=30%, list=11%, sig |
| GO NEGATI  | GO NEGATIVE REGULA    | 175 | 0.39 | 1.702 | 0.002 | 0.043  | 0.937 | 7080 | tags=30%, list=12%, sig |
| GO NEGATI  | GO NEGATIVE REGULA    | 76  | 0.52 | 1.83  | 0.002 | 0.0161 | 0.721 | 5546 | tags=32%, list=9%, sign |
| GO NEGATI  | GO NEGATIVE REGULA    | 104 | 0.56 | 2.137 | 0.002 | #####  | 0.062 | 3263 | tags=28%, list=6%, sign |
| GO INFLAM  | GO INFLAMMATORY RE    | 63  | 0.59 | 1.925 | 0.002 | 0.0067 | 0.474 | 7314 | tags=40%, list=13%, sig |
| GO REGULA  | GO REGULATION OF PEI  | 423 | 0.38 | 1.683 | 0.002 | 0.0477 | 0.956 | 4629 | tags=23%, list=8%, sign |
| GO REGULA  | GO REGULATION OF CE   | 80  | 0.64 | 2.07  | 0.002 | 0.0015 | 0.143 | 6782 | tags=44%, list=12%, sig |
| GO MACROI  | GO MACROPHAGE ACTI    | 97  | 0.63 | 2.064 | 0.002 | 0.0016 | 0.154 | 5312 | tags=43%, list=9%, sign |
| GO POSITIV | GO POSITIVE REGULATI  | 22  | 0.69 | 1.955 | 0.002 | 0.005  | 0.393 | 2043 | tags=32%, list=3%, sign |



|            |                       |     |      |       |       |        |       |       |                         |
|------------|-----------------------|-----|------|-------|-------|--------|-------|-------|-------------------------|
| GO SUPERO  | GO SUPEROXIDE ANION   | 35  | 0.6  | 1.883 | 0.002 | 0.01   | 0.586 | 6444  | tags=51%, list=11%, sig |
| GO CHEMOI  | GO CHEMOKINE BIOSYNT  | 16  | 0.65 | 1.801 | 0.002 | 0.0204 | 0.79  | 5876  | tags=50%, list=10%, sig |
| GO INTERLE | GO INTERLEUKIN 2 PRO  | 54  | 0.64 | 2.042 | 0.002 | 0.0021 | 0.198 | 3436  | tags=37%, list=6%, sign |
| GO POSITIV | GO POSITIVE REGULATI  | 60  | 0.6  | 2.015 | 0.002 | 0.0028 | 0.256 | 5312  | tags=37%, list=9%, sign |
| GO NEGATI' | GO NEGATIVE REGULA'   | 24  | 0.68 | 1.988 | 0.002 | 0.0037 | 0.325 | 5785  | tags=46%, list=10%, sig |
| GO CLATHR  | GO CLATHRIN COATED    | 38  | 0.67 | 1.948 | 0.002 | 0.0053 | 0.415 | 4653  | tags=42%, list=8%, sign |
| GO IMMUNO  | GO IMMUNOLOGICAL S    | 38  | 0.67 | 1.928 | 0.002 | 0.0065 | 0.467 | 3379  | tags=45%, list=6%, sign |
| GO POSITIV | GO POSITIVE REGULATI  | 58  | 0.54 | 1.79  | 0.002 | 0.0221 | 0.811 | 3238  | tags=29%, list=6%, sign |
| GO PEPTIDA | GO PEPTIDASE REGULA   | 221 | 0.41 | 1.595 | 0.002 | 0.0825 | 0.992 | 7209  | tags=29%, list=12%, sig |
| GO LEUKOC  | GO LEUKOCYTE ACTIV    | 48  | 0.73 | 2.137 | 0.002 | #####  | 0.062 | 4938  | tags=52%, list=8%, sign |
| GO REGULA  | GO REGULATION OF LE   | 46  | 0.61 | 1.982 | 0.002 | 0.0039 | 0.335 | 6769  | tags=54%, list=12%, sig |
| GO INTERLE | GO INTERLEUKIN 13 PR  | 21  | 0.67 | 1.973 | 0.002 | 0.0043 | 0.357 | 4359  | tags=48%, list=7%, sign |
| GO MYD88 I | GO MYD88 DEPENDENT    | 36  | 0.68 | 2.069 | 0.002 | 0.0015 | 0.147 | 8635  | tags=61%, list=15%, sig |
| GO CYTOKI  | GO CYTOKINE RECEPT    | 97  | 0.61 | 1.972 | 0.002 | 0.0043 | 0.358 | 8001  | tags=53%, list=14%, sig |
| GO LIPOPO  | GO LIPOPOLYSACCHAR    | 58  | 0.59 | 1.945 | 0.002 | 0.0055 | 0.419 | 5876  | tags=47%, list=10%, sig |
| GO MIDBOE  | GO MIDBODY ABSCISSI   | 17  | 0.69 | 1.938 | 0.002 | 0.0059 | 0.437 | 5636  | tags=47%, list=10%, sig |
| GO ANTIGE  | GO ANTIGEN PROCESSI   | 100 | 0.57 | 1.914 | 0.002 | 0.0074 | 0.5   | 4390  | tags=32%, list=8%, sign |
| GO REGULA  | GO REGULATION OF ISC  | 31  | 0.6  | 1.899 | 0.002 | 0.0086 | 0.539 | 3991  | tags=39%, list=7%, sign |
| GO SPECIFK | GO SPECIFIC GRANULE   | 62  | 0.56 | 1.897 | 0.002 | 0.0089 | 0.549 | 4998  | tags=39%, list=9%, sign |
| GO REGULA  | GO REGULATION OF CE   | 63  | 0.71 | 2.091 | 0.002 | 0.0011 | 0.11  | 3994  | tags=40%, list=7%, sign |
| GO REGULA  | GO REGULATION OF PH   | 95  | 0.62 | 2.056 | 0.002 | 0.0018 | 0.167 | 5312  | tags=44%, list=9%, sign |
| GO NEGATI' | GO NEGATIVE REGULA'   | 143 | 0.5  | 2     | 0.002 | 0.0032 | 0.284 | 6384  | tags=31%, list=11%, sig |
| GO INTRINS | GO INTRINSIC APOPTOI  | 101 | 0.47 | 1.8   | 0.002 | 0.0203 | 0.79  | 7681  | tags=40%, list=13%, sig |
| GO POSITIV | GO POSITIVE REGULATI  | 47  | 0.67 | 2.098 | 0.002 | 0.0011 | 0.102 | 2916  | tags=36%, list=5%, sign |
| GO TERTIAF | GO TERTIARY GRANULI   | 160 | 0.56 | 2.048 | 0.002 | 0.0019 | 0.185 | 4859  | tags=39%, list=8%, sign |
| GO SPECIFK | GO SPECIFIC GRANULE   | 158 | 0.52 | 1.949 | 0.002 | 0.0053 | 0.405 | 4998  | tags=37%, list=9%, sign |
| GO NEGATI' | GO NEGATIVE REGULA'   | 30  | 0.54 | 1.9   | 0.002 | 0.0086 | 0.536 | 5045  | tags=43%, list=9%, sign |
| GO INTERFE | GO INTERFERON ALPHA   | 27  | 0.68 | 1.96  | 0.002 | 0.0048 | 0.383 | 1068  | tags=30%, list=2%, sign |
| GO MACROI  | GO MACROPHAGE CHEM    | 40  | 0.6  | 1.939 | 0.002 | 0.0058 | 0.434 | 4317  | tags=38%, list=7%, sign |
| GO NEGATI' | GO NEGATIVE REGULA'   | 21  | 0.67 | 1.891 | 0.002 | 0.0093 | 0.562 | 2916  | tags=33%, list=5%, sign |
| GO OXIDOR  | GO OXIDOREDUCTASE     | 19  | 0.67 | 1.821 | 0.002 | 0.0172 | 0.739 | 8581  | tags=58%, list=15%, sig |
| GO NEGATI' | GO NEGATIVE REGULA'   | 292 | 0.43 | 1.828 | 0.002 | 0.0164 | 0.723 | 6069  | tags=27%, list=10%, sig |
| GO LYMPHC  | GO LYMPHOCYTE MIGR    | 113 | 0.61 | 1.979 | 0.002 | 0.004  | 0.339 | 6434  | tags=47%, list=11%, sig |
| GO POSITIV | GO POSITIVE REGULATI  | 21  | 0.66 | 1.98  | 0.002 | 0.004  | 0.339 | 5838  | tags=33%, list=10%, sig |
| GO CELLUL  | GO CELLULAR RESPON    | 15  | 0.76 | 1.965 | 0.002 | 0.0046 | 0.372 | 2122  | tags=53%, list=4%, sign |
| GO TRANS C | GO TRANS GOLGI NETW   | 86  | 0.52 | 1.923 | 0.002 | 0.0068 | 0.479 | 4952  | tags=30%, list=8%, sign |
| GO NEGATI' | GO NEGATIVE REGULA'   | 17  | 0.69 | 1.872 | 0.002 | 0.0112 | 0.618 | 2916  | tags=35%, list=5%, sign |
| GO REGULA  | GO REGULATION OF HE   | 86  | 0.59 | 1.967 | 0.002 | 0.0045 | 0.369 | 3131  | tags=27%, list=5%, sign |
| GO B CELL  | GO B CELL ACTIVATION  | 307 | 0.57 | 1.928 | 0.002 | 0.0065 | 0.467 | 7939  | tags=45%, list=14%, sig |
| GO CELLUL  | GO CELLULAR MODIFIE   | 48  | 0.55 | 1.88  | 0.002 | 0.0103 | 0.593 | 5400  | tags=33%, list=9%, sign |
| GO NEGATI' | GO NEGATIVE REGULA'   | 15  | 0.78 | 2.053 | 0.002 | 0.0018 | 0.172 | 6065  | tags=53%, list=10%, sig |
| GO INFLAM  | GO INFLAMMATORY CE    | 21  | 0.68 | 1.949 | 0.002 | 0.0053 | 0.406 | 4795  | tags=43%, list=8%, sign |
| GO REACTIV | GO REACTIVE OXYGEN    | 274 | 0.41 | 1.722 | 0.002 | 0.0374 | 0.918 | 5619  | tags=28%, list=10%, sig |
| GO TUMOR   | GO TUMOR NECROSIS F   | 47  | 0.58 | 1.888 | 0.002 | 0.0096 | 0.569 | 4124  | tags=32%, list=7%, sign |
| GO REGULA  | GO REGULATION OF RE   | 15  | 0.75 | 1.949 | 0.002 | 0.0053 | 0.411 | 4639  | tags=60%, list=8%, sign |
| GO KILLING | GO KILLING OF CELLS I | 28  | 0.61 | 1.768 | 0.002 | 0.0266 | 0.85  | 10123 | tags=50%, list=17%, sig |
| GO POSITIV | GO POSITIVE REGULATI  | 30  | 0.66 | 2.014 | 0.002 | 0.0028 | 0.259 | 2002  | tags=33%, list=3%, sign |
| GO DEOXYF  | GO DEOXYRIBONUCLE     | 17  | 0.71 | 1.922 | 0.002 | 0.0069 | 0.482 | 2242  | tags=35%, list=4%, sign |
| GO REGULA  | GO REGULATION OF HE   | 73  | 0.63 | 1.994 | 0.002 | 0.0035 | 0.305 | 3131  | tags=32%, list=5%, sign |
| GO POSITIV | GO POSITIVE REGULATI  | 37  | 0.66 | 1.925 | 0.002 | 0.0067 | 0.475 | 6093  | tags=51%, list=10%, sig |
| GO NEGATI' | GO NEGATIVE REGULA'   | 41  | 0.58 | 1.868 | 0.002 | 0.0117 | 0.632 | 3003  | tags=32%, list=5%, sign |
| GO POSITIV | GO POSITIVE REGULATI  | 79  | 0.51 | 1.831 | 0.002 | 0.0161 | 0.721 | 4938  | tags=34%, list=8%, sign |
| GO CYSTEIN | GO CYSTEINE TYPE ENI  | 114 | 0.47 | 1.768 | 0.002 | 0.0266 | 0.85  | 6375  | tags=26%, list=11%, sig |
| GO POSITIV | GO POSITIVE REGULATI  | 86  | 0.6  | 1.995 | 0.002 | 0.0035 | 0.304 | 5312  | tags=42%, list=9%, sign |
| GO PEPTIDA | GO PEPTIDASE ACTIVA'  | 37  | 0.6  | 1.979 | 0.002 | 0.004  | 0.339 | 5115  | tags=35%, list=9%, sign |
| GO NADPLU  | GO NADPLUS NUCLEOS    | 16  | 0.71 | 1.841 | 0.002 | 0.0149 | 0.702 | 3466  | tags=50%, list=6%, sign |
| GO RESPON  | GO RESPONSE TO DSRN   | 51  | 0.54 | 1.823 | 0.002 | 0.0169 | 0.735 | 8377  | tags=47%, list=14%, sig |
| GO NEGATI' | GO NEGATIVE REGULA'   | 422 | 0.43 | 1.861 | 0.002 | 0.0125 | 0.645 | 4992  | tags=24%, list=9%, sign |

|             |                       |     |      |       |       |        |       |       |                         |
|-------------|-----------------------|-----|------|-------|-------|--------|-------|-------|-------------------------|
| GO REGULA   | GO REGULATION OF RE   | 191 | 0.42 | 1.732 | 0.002 | 0.0349 | 0.905 | 5619  | tags=30%, list=10%, sig |
| GO CYTOKI   | GO CYTOKINE METABO    | 73  | 0.57 | 1.943 | 0.002 | 0.0056 | 0.424 | 2705  | tags=32%, list=5%, sign |
| GO NUCLEC   | GO NUCLEOSIDE METAI   | 99  | 0.49 | 1.871 | 0.002 | 0.0112 | 0.619 | 10245 | tags=48%, list=18%, sig |
| GO POSITIV  | GO POSITIVE REGULATI  | 21  | 0.63 | 1.764 | 0.002 | 0.0274 | 0.859 | 10532 | tags=62%, list=18%, sig |
| GO POSITIV  | GO POSITIVE REGULATI  | 54  | 0.51 | 1.722 | 0.002 | 0.0374 | 0.918 | 6444  | tags=39%, list=11%, sig |
| GO NEGATI'  | GO NEGATIVE REGULA'   | 43  | 0.59 | 1.93  | 0.002 | 0.0064 | 0.46  | 7299  | tags=47%, list=13%, sig |
| GO REGULA   | GO REGULATION OF RE   | 47  | 0.54 | 1.873 | 0.002 | 0.0111 | 0.616 | 7601  | tags=43%, list=13%, sig |
| GO INTRINS  | GO INTRINSIC APOPTOI  | 280 | 0.42 | 1.717 | 0.002 | 0.0386 | 0.926 | 7681  | tags=35%, list=13%, sig |
| GO INTRINS  | GO INTRINSIC APOPTOI  | 44  | 0.55 | 1.881 | 0.004 | 0.0102 | 0.592 | 7681  | tags=48%, list=13%, sig |
| GO REGULA   | GO REGULATION OF T F  | 27  | 0.71 | 1.928 | 0.004 | 0.0065 | 0.467 | 3436  | tags=44%, list=6%, sign |
| GO CCR CHI  | GO CCR CHEMOKINE RE   | 41  | 0.71 | 2.002 | 0.004 | 0.0032 | 0.281 | 4110  | tags=46%, list=7%, sign |
| GO T CELL C | GO T CELL CHEMOTAXI   | 28  | 0.68 | 1.949 | 0.004 | 0.0053 | 0.411 | 2542  | tags=36%, list=4%, sign |
| GO DEATH I  | GO DEATH RECEPTOR B   | 19  | 0.64 | 1.904 | 0.004 | 0.0083 | 0.521 | 6375  | tags=53%, list=11%, sig |
| GO T HELPE  | GO T HELPER 1 CELL DI | 19  | 0.67 | 1.859 | 0.004 | 0.0128 | 0.652 | 1318  | tags=42%, list=2%, sign |
| GO GOLGI A  | GO GOLGI ASSOCIATED   | 107 | 0.55 | 1.957 | 0.004 | 0.0049 | 0.386 | 4459  | tags=30%, list=8%, sign |
| GO REGULA   | GO REGULATION OF LY   | 27  | 0.67 | 1.98  | 0.004 | 0.004  | 0.339 | 3483  | tags=44%, list=6%, sign |
| GO VIRION . | GO VIRION ASSEMBLY    | 40  | 0.54 | 1.793 | 0.004 | 0.0215 | 0.802 | 5777  | tags=45%, list=10%, sig |
| GO ANTIBA   | GO ANTIBACTERIAL HU   | 49  | 0.6  | 1.802 | 0.004 | 0.0201 | 0.78  | 9849  | tags=45%, list=17%, sig |
| GO HEPATO   | GO HEPATOCYTE GROW    | 16  | 0.6  | 1.744 | 0.004 | 0.0319 | 0.89  | 6471  | tags=50%, list=11%, sig |
| GO ENDOSC   | GO ENDOSOME ORGANI    | 75  | 0.51 | 1.85  | 0.004 | 0.0139 | 0.676 | 7629  | tags=43%, list=13%, sig |
| GO THYMO    | GO THYMOCYTE APOPTI   | 17  | 0.63 | 1.85  | 0.004 | 0.0139 | 0.677 | 2894  | tags=41%, list=5%, sign |
| GO REGULA   | GO REGULATION OF TY   | 35  | 0.61 | 1.97  | 0.004 | 0.0044 | 0.365 | 1735  | tags=29%, list=3%, sign |
| GO EXTERN   | GO EXTERNAL SIDE OF   | 401 | 0.58 | 1.978 | 0.004 | 0.0041 | 0.343 | 3878  | tags=34%, list=7%, sign |
| GO POSITIV  | GO POSITIVE REGULATI  | 26  | 0.67 | 1.856 | 0.004 | 0.0131 | 0.661 | 2361  | tags=35%, list=4%, sign |
| GO REGULA   | GO REGULATION OF DE   | 29  | 0.65 | 1.943 | 0.004 | 0.0056 | 0.424 | 3967  | tags=38%, list=7%, sign |
| GO GLIAL C  | GO GLIAL CELL ACTIVA  | 58  | 0.63 | 1.937 | 0.004 | 0.0059 | 0.439 | 4938  | tags=45%, list=8%, sign |
| GO POSITIV  | GO POSITIVE REGULATI  | 24  | 0.68 | 1.932 | 0.004 | 0.0062 | 0.453 | 6795  | tags=54%, list=12%, sig |
| GO T HELPE  | GO T HELPER CELL LINI | 16  | 0.76 | 1.901 | 0.004 | 0.0086 | 0.535 | 6605  | tags=69%, list=11%, sig |
| GO POSITIV  | GO POSITIVE REGULATI  | 28  | 0.56 | 1.851 | 0.004 | 0.0138 | 0.674 | 3623  | tags=32%, list=6%, sign |
| GO AMIDE T  | GO AMIDE TRANSMEMI    | 49  | 0.48 | 1.694 | 0.004 | 0.0449 | 0.948 | 4959  | tags=22%, list=8%, sign |
| GO DEFENS   | GO DEFENSE RESPONSE   | 78  | 0.49 | 1.752 | 0.004 | 0.0299 | 0.872 | 8971  | tags=37%, list=15%, sig |
| GO POSITIV  | GO POSITIVE REGULATI  | 37  | 0.62 | 1.876 | 0.004 | 0.0107 | 0.606 | 3483  | tags=38%, list=6%, sign |
| GO NEGATI'  | GO NEGATIVE REGULA'   | 54  | 0.5  | 1.826 | 0.004 | 0.0165 | 0.728 | 7903  | tags=44%, list=14%, sig |
| GO POSITIV  | GO POSITIVE REGULATI  | 60  | 0.52 | 1.846 | 0.004 | 0.0144 | 0.689 | 5636  | tags=35%, list=10%, sig |
| GO POSITIV  | GO POSITIVE REGULATI  | 102 | 0.48 | 1.811 | 0.004 | 0.0187 | 0.762 | 5546  | tags=37%, list=9%, sign |
| GO AMIDE F  | GO AMIDE BINDING      | 368 | 0.4  | 1.699 | 0.004 | 0.0436 | 0.94  | 4903  | tags=23%, list=8%, sign |
| GO IMMUN    | GO IMMUNOGLOBULIN     | 55  | 0.59 | 1.892 | 0.004 | 0.0092 | 0.559 | 4039  | tags=35%, list=7%, sign |
| GO POSITIV  | GO POSITIVE REGULATI  | 21  | 0.6  | 1.84  | 0.004 | 0.0151 | 0.703 | 4852  | tags=38%, list=8%, sign |
| GO NON ME   | GO NON MEMBRANE SP    | 46  | 0.56 | 1.829 | 0.004 | 0.0163 | 0.723 | 7949  | tags=46%, list=14%, sig |
| GO T CELL I | GO T CELL DIFFERENTL  | 75  | 0.51 | 1.83  | 0.004 | 0.0161 | 0.721 | 2519  | tags=28%, list=4%, sign |
| GO PEPTIDA  | GO PEPTIDASE COMPLE   | 90  | 0.63 | 2.004 | 0.004 | 0.0031 | 0.278 | 2770  | tags=28%, list=5%, sign |
| GO TRANSL   | GO TRANSLATION SYNT   | 39  | 0.68 | 1.97  | 0.004 | 0.0044 | 0.365 | 9018  | tags=56%, list=15%, sig |
| GO PURINE   | GO PURINE CONTAININ   | 15  | 0.7  | 1.909 | 0.004 | 0.0079 | 0.512 | 8546  | tags=67%, list=15%, sig |
| GO POSITIV  | GO POSITIVE REGULATI  | 25  | 0.65 | 1.975 | 0.004 | 0.0042 | 0.349 | 2359  | tags=44%, list=4%, sign |
| GO MACROI   | GO MACROPHAGE ACTI    | 15  | 0.74 | 1.855 | 0.004 | 0.0132 | 0.662 | 2086  | tags=53%, list=4%, sign |
| GO MACROI   | GO MACROPHAGE DIFF    | 47  | 0.61 | 1.885 | 0.004 | 0.0099 | 0.578 | 2629  | tags=32%, list=5%, sign |
| GO LYMPHC   | GO LYMPHOCYTE HOM     | 62  | 0.64 | 2.033 | 0.004 | 0.0023 | 0.218 | 6691  | tags=47%, list=11%, sig |
| GO HYDROI   | GO HYDROLASE ACTIVI   | 34  | 0.52 | 1.737 | 0.004 | 0.0337 | 0.898 | 5989  | tags=41%, list=10%, sig |
| GO SUPERO   | GO SUPEROXIDE METAI   | 73  | 0.48 | 1.733 | 0.004 | 0.0348 | 0.903 | 6665  | tags=37%, list=11%, sig |
| GO RELEAS   | GO RELEASE OF CYTOC   | 58  | 0.53 | 1.918 | 0.004 | 0.0071 | 0.491 | 6251  | tags=38%, list=11%, sig |
| GO DETECT   | GO DETECTION OF EXTI  | 24  | 0.73 | 1.874 | 0.004 | 0.011  | 0.611 | 2983  | tags=42%, list=5%, sign |
| GO HEMAT    | GO HEMATOPOIETIC ST   | 87  | 0.58 | 1.985 | 0.004 | 0.0038 | 0.328 | 5095  | tags=33%, list=9%, sign |
| GO PYRIMII  | GO PYRIMIDINE CONTA   | 38  | 0.51 | 1.777 | 0.004 | 0.0249 | 0.833 | 10152 | tags=55%, list=17%, sig |
| GO COMPLE   | GO COMPLEMENT ACTI    | 165 | 0.66 | 1.801 | 0.006 | 0.0202 | 0.789 | 7872  | tags=58%, list=13%, sig |
| GO NUCLEC   | GO NUCLEOTIDE BINDI   | 36  | 0.57 | 1.837 | 0.006 | 0.0155 | 0.709 | 10512 | tags=58%, list=18%, sig |
| GO CHEMOI   | GO CHEMOKINE PRODU    | 93  | 0.53 | 1.963 | 0.006 | 0.0047 | 0.378 | 5876  | tags=34%, list=10%, sig |
| GO SECRET   | GO SECRETORY GRANU    | 296 | 0.46 | 1.84  | 0.006 | 0.0151 | 0.703 | 7668  | tags=36%, list=13%, sig |
| GO POSITIV  | GO POSITIVE REGULATI  | 138 | 0.54 | 1.92  | 0.006 | 0.007  | 0.488 | 6386  | tags=42%, list=11%, sig |

|             |                       |     |      |       |       |        |       |      |                         |
|-------------|-----------------------|-----|------|-------|-------|--------|-------|------|-------------------------|
| GO CXCR C   | GO CXCR CHEMOKINE I   | 17  | 0.79 | 1.908 | 0.006 | 0.008  | 0.516 | 2542 | tags=35%, list=4%, sign |
| GO POSITIV  | GO POSITIVE REGULATI  | 67  | 0.6  | 2.011 | 0.006 | 0.0029 | 0.265 | 5619 | tags=43%, list=10%, sig |
| GO LEUKOC   | GO LEUKOCYTE CHEMC    | 222 | 0.53 | 1.925 | 0.006 | 0.0067 | 0.473 | 6386 | tags=36%, list=11%, sig |
| GO NUCLEC   | GO NUCLEOTIDE RECEP   | 21  | 0.69 | 1.826 | 0.006 | 0.0166 | 0.728 | 6701 | tags=52%, list=11%, sig |
| GO IMMUN    | GO IMMUNOGLOBULIN     | 148 | 0.77 | 1.8   | 0.006 | 0.0204 | 0.79  | 8081 | tags=69%, list=14%, sig |
| GO REGULA   | GO REGULATION OF B C  | 20  | 0.59 | 1.764 | 0.006 | 0.0273 | 0.856 | 2630 | tags=30%, list=5%, sign |
| GO REGULA   | GO REGULATION OF AN   | 20  | 0.76 | 1.885 | 0.006 | 0.0098 | 0.575 | 5785 | tags=65%, list=10%, sig |
| GO REGULA   | GO REGULATION OF MY   | 57  | 0.57 | 1.884 | 0.006 | 0.0099 | 0.58  | 3331 | tags=37%, list=6%, sign |
| GO ENDOSC   | GO ENDOSOME LUMEN     | 35  | 0.53 | 1.74  | 0.006 | 0.0329 | 0.893 | 8253 | tags=37%, list=14%, sig |
| GO CYSTEIN  | GO CYSTEINE TYPE ENI  | 59  | 0.49 | 1.699 | 0.006 | 0.0437 | 0.94  | 6860 | tags=37%, list=12%, sig |
| GO REGULA   | GO REGULATION OF LEI  | 120 | 0.54 | 1.946 | 0.006 | 0.0054 | 0.416 | 6386 | tags=39%, list=11%, sig |
| GO POSITIV  | GO POSITIVE REGULATI  | 20  | 0.68 | 1.849 | 0.006 | 0.014  | 0.681 | 1068 | tags=30%, list=2%, sign |
| GO ESCRT C  | GO ESCRT COMPLEX      | 27  | 0.58 | 1.808 | 0.006 | 0.0192 | 0.769 | 5636 | tags=44%, list=10%, sig |
| GO PHAGOC   | GO PHAGOCYTIC CUP     | 25  | 0.64 | 1.901 | 0.006 | 0.0085 | 0.532 | 5939 | tags=52%, list=10%, sig |
| GO REGULA   | GO REGULATION OF LEI  | 206 | 0.52 | 1.914 | 0.006 | 0.0074 | 0.499 | 6434 | tags=39%, list=11%, sig |
| GO T CELL M | GO T CELL MIGRATION   | 65  | 0.63 | 1.922 | 0.006 | 0.0069 | 0.483 | 2846 | tags=35%, list=5%, sign |
| GO RESPON   | GO RESPONSE TO UV C   | 16  | 0.64 | 1.817 | 0.006 | 0.0178 | 0.746 | 2111 | tags=31%, list=4%, sign |
| GO RESPON   | GO RESPONSE TO FUNG   | 54  | 0.56 | 1.773 | 0.006 | 0.0255 | 0.84  | 7298 | tags=43%, list=12%, sig |
| GO REGULA   | GO REGULATION OF MA   | 42  | 0.62 | 1.956 | 0.006 | 0.0049 | 0.387 | 7814 | tags=52%, list=13%, sig |
| GO POSITIV  | GO POSITIVE REGULATI  | 419 | 0.5  | 1.921 | 0.006 | 0.0069 | 0.486 | 3623 | tags=28%, list=6%, sign |
| GO POSITIV  | GO POSITIVE REGULATI  | 34  | 0.6  | 1.874 | 0.006 | 0.011  | 0.614 | 2290 | tags=38%, list=4%, sign |
| GO CELLUL   | GO CELLULAR RESPON    | 78  | 0.53 | 1.871 | 0.006 | 0.0112 | 0.619 | 6506 | tags=38%, list=11%, sig |
| GO MACROI   | GO MACROPHAGE MIGR    | 54  | 0.6  | 1.937 | 0.006 | 0.0059 | 0.441 | 8001 | tags=50%, list=14%, sig |
| GO EXTRIN   | GO EXTRINSIC APOPTO   | 87  | 0.48 | 1.831 | 0.006 | 0.016  | 0.721 | 3003 | tags=26%, list=5%, sign |
| GO COATED   | GO COATED VESICLE M   | 177 | 0.49 | 1.821 | 0.006 | 0.0172 | 0.74  | 4653 | tags=27%, list=8%, sign |
| GO POSITIV  | GO POSITIVE REGULATI  | 29  | 0.64 | 1.9   | 0.006 | 0.0086 | 0.538 | 3340 | tags=41%, list=6%, sign |
| GO INTERLE  | GO INTERLEUKIN 7 MEI  | 17  | 0.69 | 1.805 | 0.006 | 0.0197 | 0.777 | 2519 | tags=47%, list=4%, sign |
| GO PINOCY   | GO PINOCYTOSIS        | 22  | 0.58 | 1.788 | 0.006 | 0.0224 | 0.814 | 8857 | tags=59%, list=15%, sig |
| GO GLYCOS   | GO GLYCOSYL COMPOU    | 124 | 0.43 | 1.689 | 0.006 | 0.0462 | 0.952 | 8789 | tags=39%, list=15%, sig |
| GO DEOXYF   | GO DEOXYRIBONUCLEO    | 34  | 0.62 | 1.887 | 0.006 | 0.0096 | 0.569 | 7852 | tags=53%, list=13%, sig |
| GO REGULA   | GO REGULATION OF EX   | 61  | 0.52 | 1.793 | 0.006 | 0.0216 | 0.802 | 3003 | tags=28%, list=5%, sign |
| GO RESPON   | GO RESPONSE TO INTEF  | 55  | 0.49 | 1.642 | 0.006 | 0.0622 | 0.979 | 1386 | tags=20%, list=2%, sign |
| GO PROTEIN  | GO PROTEIN MODIFICA   | 288 | 0.5  | 1.83  | 0.006 | 0.0161 | 0.721 | 6166 | tags=29%, list=11%, sig |
| GO INTRINS  | GO INTRINSIC APOPTOI  | 59  | 0.5  | 1.815 | 0.006 | 0.0181 | 0.75  | 6471 | tags=34%, list=11%, sig |
| GO NUCLEC   | GO NUCLEOSIDE TRIPH   | 87  | 0.43 | 1.656 | 0.007 | 0.0577 | 0.973 | 8789 | tags=40%, list=15%, sig |
| GO T HELPE  | GO T HELPER 2 CELL CY | 15  | 0.62 | 1.76  | 0.007 | 0.0282 | 0.863 | 2043 | tags=27%, list=3%, sign |
| GO REGULA   | GO REGULATION OF MA   | 55  | 0.59 | 1.92  | 0.008 | 0.0069 | 0.487 | 5104 | tags=36%, list=9%, sign |
| GO POSITIV  | GO POSITIVE REGULATI  | 41  | 0.59 | 1.858 | 0.008 | 0.0128 | 0.653 | 2361 | tags=32%, list=4%, sign |
| GO ORGAN    | GO ORGAN OR TISSUE S  | 32  | 0.56 | 1.665 | 0.008 | 0.0545 | 0.969 | 8589 | tags=50%, list=15%, sig |
| GO NITRIC   | GO NITRIC OXIDE SYNT  | 19  | 0.65 | 1.796 | 0.008 | 0.0211 | 0.796 | 2266 | tags=32%, list=4%, sign |
| GO REGULA   | GO REGULATION OF MI   | 19  | 0.7  | 1.807 | 0.008 | 0.0195 | 0.775 | 4352 | tags=47%, list=7%, sign |
| GO REGULA   | GO REGULATION OF NE   | 41  | 0.58 | 1.789 | 0.008 | 0.0222 | 0.812 | 5045 | tags=39%, list=9%, sign |
| GO GRANUI   | GO GRANULOCYTE MIG    | 143 | 0.57 | 1.969 | 0.008 | 0.0044 | 0.366 | 6386 | tags=41%, list=11%, sig |
| GO CHRONI   | GO CHRONIC INFLAMM    | 20  | 0.67 | 1.791 | 0.008 | 0.0218 | 0.808 | 9938 | tags=65%, list=17%, sig |
| GO MYELOI   | GO MYELOID LEUKOCY    | 208 | 0.47 | 1.831 | 0.008 | 0.016  | 0.721 | 6389 | tags=34%, list=11%, sig |
| GO POSITIV  | GO POSITIVE REGULATI  | 93  | 0.54 | 1.907 | 0.008 | 0.008  | 0.516 | 6386 | tags=42%, list=11%, sig |
| GO GRANUI   | GO GRANULOCYTE CHE    | 120 | 0.57 | 1.903 | 0.008 | 0.0083 | 0.527 | 6386 | tags=39%, list=11%, sig |
| GO NEUROI   | GO NEUROINFLAMMAT     | 75  | 0.58 | 1.9   | 0.008 | 0.0086 | 0.536 | 5045 | tags=41%, list=9%, sign |
| GO NEGAT'   | GO NEGATIVE REGULA'   | 188 | 0.42 | 1.714 | 0.008 | 0.0397 | 0.929 | 5619 | tags=27%, list=10%, sig |
| GO NEGAT'   | GO NEGATIVE REGULA'   | 25  | 0.56 | 1.692 | 0.008 | 0.0454 | 0.951 | 5416 | tags=44%, list=9%, sign |
| GO NEGAT'   | GO NEGATIVE REGULA'   | 32  | 0.63 | 1.884 | 0.008 | 0.0099 | 0.58  | 4359 | tags=38%, list=7%, sign |
| GO MYELOI   | GO MYELOID LEUKOCY    | 211 | 0.53 | 1.904 | 0.008 | 0.0083 | 0.521 | 6161 | tags=37%, list=11%, sig |
| GO CLATHR   | GO CLATHRIN COATED    | 115 | 0.48 | 1.786 | 0.008 | 0.0227 | 0.818 | 3159 | tags=24%, list=5%, sign |
| GO VIRAL B  | GO VIRAL BUDDING      | 26  | 0.58 | 1.751 | 0.008 | 0.0301 | 0.875 | 5636 | tags=42%, list=10%, sig |
| GO OXIDOR   | GO OXIDOREDUCTASE     | 108 | 0.5  | 1.816 | 0.008 | 0.018  | 0.747 | 8955 | tags=48%, list=15%, sig |
| GO NEGAT'   | GO NEGATIVE REGULA'   | 102 | 0.61 | 1.938 | 0.008 | 0.0059 | 0.437 | 6103 | tags=33%, list=10%, sig |
| GO INTERLE  | GO INTERLEUKIN 1 REC  | 16  | 0.69 | 1.706 | 0.008 | 0.0421 | 0.932 | 6836 | tags=56%, list=12%, sig |
| GO PROTEIN  | GO PROTEIN POLYUBIQ   | 332 | 0.46 | 1.805 | 0.008 | 0.0196 | 0.778 | 6850 | tags=30%, list=12%, sig |

|              |                       |     |      |       |       |        |       |       |                         |
|--------------|-----------------------|-----|------|-------|-------|--------|-------|-------|-------------------------|
| GO THYMIC    | GO THYMIC T CELL SEL  | 22  | 0.7  | 1.89  | 0.008 | 0.0094 | 0.565 | 3953  | tags=55%, list=7%, sign |
| GO MHC CL    | GO MHC CLASS II BIOSY | 16  | 0.73 | 1.836 | 0.008 | 0.0155 | 0.71  | 3436  | tags=44%, list=6%, sign |
| GO POSITIV   | GO POSITIVE REGULATI  | 22  | 0.63 | 1.77  | 0.008 | 0.0262 | 0.846 | 4938  | tags=50%, list=8%, sign |
| GO RIG I SIC | GO RIG I SIGNALING PA | 23  | 0.57 | 1.69  | 0.008 | 0.0459 | 0.952 | 1144  | tags=22%, list=2%, sign |
| GO ACUTE I   | GO ACUTE INFLAMMAT    | 110 | 0.5  | 1.8   | 0.008 | 0.0204 | 0.79  | 8635  | tags=41%, list=15%, sig |
| GO BLOC C    | GO BLOC COMPLEX       | 19  | 0.63 | 1.827 | 0.009 | 0.0165 | 0.728 | 8714  | tags=63%, list=15%, sig |
| GO REGULA    | GO REGULATION OF MY   | 232 | 0.42 | 1.685 | 0.009 | 0.0471 | 0.955 | 6389  | tags=29%, list=11%, sig |
| GO MYELOI    | GO MYELOID CELL DIFF  | 396 | 0.41 | 1.701 | 0.009 | 0.0432 | 0.939 | 6389  | tags=28%, list=11%, sig |
| GO NEGAT'    | GO NEGATIVE REGULA'   | 16  | 0.61 | 1.7   | 0.009 | 0.0435 | 0.94  | 1338  | tags=25%, list=2%, sign |
| GO NATURA    | GO NATURAL KILLER C   | 22  | 0.58 | 1.67  | 0.009 | 0.0524 | 0.968 | 2396  | tags=27%, list=4%, sign |
| GO HYDROC    | GO HYDROGEN PEROXI    | 16  | 0.62 | 1.766 | 0.009 | 0.0269 | 0.851 | 4738  | tags=50%, list=8%, sign |
| GO REGULA    | GO REGULATION OF AP   | 401 | 0.38 | 1.631 | 0.009 | 0.0671 | 0.984 | 7681  | tags=31%, list=13%, sig |
| GO POSITIV   | GO POSITIVE REGULATI  | 393 | 0.38 | 1.627 | 0.009 | 0.0688 | 0.985 | 5494  | tags=25%, list=9%, sign |
| GO NEGAT'    | GO NEGATIVE REGULA'   | 16  | 0.71 | 1.819 | 0.01  | 0.0175 | 0.744 | 2748  | tags=44%, list=5%, sign |
| GO TRANSP    | GO TRANSPORT VESICL   | 200 | 0.44 | 1.684 | 0.01  | 0.0476 | 0.956 | 5698  | tags=26%, list=10%, sig |
| GO REGULA    | GO REGULATION OF INI  | 32  | 0.69 | 1.875 | 0.01  | 0.0109 | 0.611 | 7314  | tags=50%, list=13%, sig |
| GO IRON IO   | GO IRON ION TRANSME   | 18  | 0.59 | 1.706 | 0.01  | 0.0421 | 0.932 | 6306  | tags=44%, list=11%, sig |
| GO FAT SOL   | GO FAT SOLUBLE VITAM  | 15  | 0.66 | 1.792 | 0.01  | 0.0217 | 0.806 | 5219  | tags=47%, list=9%, sign |
| GO MULTIV    | GO MULTIVESICULAR B   | 31  | 0.58 | 1.823 | 0.01  | 0.017  | 0.735 | 3932  | tags=39%, list=7%, sign |
| GO REGULA    | GO REGULATION OF VII  | 19  | 0.58 | 1.725 | 0.01  | 0.0368 | 0.916 | 2002  | tags=26%, list=3%, sign |
| GO REGULA    | GO REGULATION OF B C  | 62  | 0.58 | 1.825 | 0.01  | 0.0167 | 0.732 | 2802  | tags=32%, list=5%, sign |
| GO POSTRE    | GO POSTREPLICATION I  | 49  | 0.62 | 1.848 | 0.01  | 0.0141 | 0.681 | 9018  | tags=51%, list=15%, sig |
| GO NEGAT'    | GO NEGATIVE REGULA'   | 15  | 0.67 | 1.746 | 0.01  | 0.0314 | 0.885 | 1735  | tags=33%, list=3%, sign |
| GO REGULA    | GO REGULATION OF OS'  | 66  | 0.49 | 1.71  | 0.01  | 0.0408 | 0.93  | 6716  | tags=39%, list=12%, sig |
| GO REGULA    | GO REGULATION OF SU   | 37  | 0.52 | 1.737 | 0.01  | 0.0337 | 0.896 | 6444  | tags=38%, list=11%, sig |
| GO MEMBR.    | GO MEMBRANE RAFT O    | 25  | 0.6  | 1.836 | 0.01  | 0.0155 | 0.712 | 8159  | tags=68%, list=14%, sig |
| GO POSITIV   | GO POSITIVE REGULATI  | 25  | 0.67 | 1.845 | 0.01  | 0.0144 | 0.69  | 8001  | tags=60%, list=14%, sig |
| GO CD8 POS   | GO CD8 POSITIVE ALPH  | 15  | 0.69 | 1.73  | 0.01  | 0.0352 | 0.91  | 6975  | tags=47%, list=12%, sig |
| GO NUCLEC    | GO NUCLEOBASE CONT    | 102 | 0.42 | 1.659 | 0.01  | 0.0563 | 0.973 | 8966  | tags=38%, list=15%, sig |
| GO POSITIV   | GO POSITIVE REGULATI  | 26  | 0.67 | 1.814 | 0.01  | 0.0183 | 0.752 | 4124  | tags=42%, list=7%, sign |
| GO POSITIV   | GO POSITIVE REGULATI  | 31  | 0.54 | 1.667 | 0.011 | 0.0534 | 0.969 | 5619  | tags=32%, list=10%, sig |
| GO DNA DA    | GO DNA DAMAGE RESP    | 18  | 0.55 | 1.622 | 0.011 | 0.0706 | 0.987 | 4763  | tags=28%, list=8%, sign |
| GO REGULA    | GO REGULATION OF LY   | 62  | 0.57 | 1.848 | 0.011 | 0.0141 | 0.681 | 8773  | tags=48%, list=15%, sig |
| GO PHOSPH    | GO PHOSPHATIDYLINO    | 29  | 0.56 | 1.77  | 0.011 | 0.0262 | 0.847 | 8059  | tags=52%, list=14%, sig |
| GO ENDOPL    | GO ENDOPLASMIC RETI   | 23  | 0.56 | 1.758 | 0.011 | 0.0286 | 0.865 | 7829  | tags=39%, list=13%, sig |
| GO AOPTO     | GO APOPTOTIC MITOCH   | 120 | 0.44 | 1.713 | 0.011 | 0.04   | 0.929 | 7601  | tags=37%, list=13%, sig |
| GO HYDROI    | GO HYDROLASE ACTIVI   | 119 | 0.4  | 1.627 | 0.011 | 0.0688 | 0.985 | 6396  | tags=28%, list=11%, sig |
| GO HEMATC    | GO HEMATOPOIETIC PR   | 170 | 0.43 | 1.679 | 0.011 | 0.0494 | 0.961 | 7843  | tags=32%, list=13%, sig |
| GO DETECT    | GO DETECTION OF OTH   | 19  | 0.73 | 1.806 | 0.011 | 0.0195 | 0.775 | 2198  | tags=37%, list=4%, sign |
| GO RIBONU    | GO RIBONUCLEOSIDE M   | 69  | 0.44 | 1.682 | 0.011 | 0.0479 | 0.957 | 8764  | tags=41%, list=15%, sig |
| GO NEGAT'    | GO NEGATIVE REGULA'   | 356 | 0.35 | 1.48  | 0.011 | 0.1439 | 0.999 | 7829  | tags=27%, list=13%, sig |
| GO PIGMEN    | GO PIGMENT GRANULE    | 26  | 0.55 | 1.731 | 0.011 | 0.0352 | 0.909 | 7458  | tags=35%, list=13%, sig |
| GO ESTABL    | GO ESTABLISHMENT OF   | 24  | 0.55 | 1.686 | 0.011 | 0.047  | 0.955 | 6036  | tags=29%, list=10%, sig |
| GO LAMELL    | GO LAMELLAR BODY      | 17  | 0.66 | 1.648 | 0.012 | 0.0603 | 0.977 | 4659  | tags=29%, list=8%, sign |
| GO MONOC'    | GO MONOCYTE CHEMO     | 64  | 0.59 | 1.799 | 0.012 | 0.0206 | 0.79  | 5097  | tags=41%, list=9%, sign |
| GO IMMUN     | GO IMMUNOGLOBULIN     | 62  | 0.79 | 1.733 | 0.012 | 0.0347 | 0.903 | 7872  | tags=74%, list=13%, sig |
| GO OXIDOR    | GO OXIDOREDUCTASE     | 55  | 0.51 | 1.792 | 0.012 | 0.0216 | 0.804 | 6732  | tags=38%, list=12%, sig |
| GO INTRINS   | GO INTRINSIC AOPTO    | 76  | 0.48 | 1.756 | 0.012 | 0.0289 | 0.868 | 7681  | tags=41%, list=13%, sig |
| GO VIRAL B   | GO VIRAL BUDDING VI   | 21  | 0.6  | 1.704 | 0.012 | 0.0425 | 0.936 | 5636  | tags=48%, list=10%, sig |
| GO MONON     | GO MONONUCLEAR CEI    | 38  | 0.52 | 1.73  | 0.012 | 0.0353 | 0.91  | 2629  | tags=26%, list=5%, sign |
| GO LIPOPOI   | GO LIPOPOLYSACCHAR    | 31  | 0.61 | 1.788 | 0.012 | 0.0224 | 0.813 | 4094  | tags=42%, list=7%, sign |
| GO PYRIDIN   | GO PYRIDINE CONTAIN   | 33  | 0.47 | 1.565 | 0.012 | 0.0969 | 0.996 | 8909  | tags=39%, list=15%, sig |
| GO REGULA    | GO REGULATION OF B C  | 29  | 0.61 | 1.763 | 0.012 | 0.0275 | 0.86  | 7576  | tags=48%, list=13%, sig |
| GO CYTOLY    | GO CYTOLYSIS          | 29  | 0.62 | 1.765 | 0.012 | 0.0272 | 0.855 | 6482  | tags=45%, list=11%, sig |
| GO HYDROC    | GO HYDROGEN PEROXI    | 56  | 0.41 | 1.508 | 0.013 | 0.1269 | 0.999 | 4738  | tags=25%, list=8%, sign |
| GO REGULA    | GO REGULATION OF MA   | 29  | 0.58 | 1.805 | 0.013 | 0.0197 | 0.778 | 10492 | tags=55%, list=18%, sig |
| GO PURINE    | GO PURINE NUCLEOSID   | 65  | 0.43 | 1.642 | 0.013 | 0.0624 | 0.981 | 8753  | tags=43%, list=15%, sig |
| GO GRANUL    | GO GRANULOCYTE MAC    | 16  | 0.64 | 1.72  | 0.013 | 0.0379 | 0.922 | 5312  | tags=50%, list=9%, sign |

|                       |     |      |       |       |        |       |                               |
|-----------------------|-----|------|-------|-------|--------|-------|-------------------------------|
| GO INTERLEUKIN 6 MEI  | 34  | 0.54 | 1.675 | 0.013 | 0.0504 | 0.965 | 1386 tags=21%, list=2%, sign  |
| GO COPPER ION HOME    | 17  | 0.59 | 1.644 | 0.013 | 0.0614 | 0.979 | 2308 tags=35%, list=4%, sign  |
| GO RESPONSE TO INTE   | 28  | 0.56 | 1.703 | 0.013 | 0.0427 | 0.936 | 2988 tags=36%, list=5%, sign  |
| GO REGULATION OF NU   | 22  | 0.6  | 1.722 | 0.013 | 0.0375 | 0.918 | 4960 tags=36%, list=8%, sign  |
| GO RESPONSE TO CADM   | 64  | 0.45 | 1.61  | 0.013 | 0.0761 | 0.989 | 5332 tags=25%, list=9%, sign  |
| GO MYELOID CELL APO   | 32  | 0.55 | 1.73  | 0.013 | 0.0353 | 0.911 | 4795 tags=31%, list=8%, sign  |
| GO NEGATIVE REGULA    | 22  | 0.57 | 1.698 | 0.013 | 0.044  | 0.941 | 2481 tags=27%, list=4%, sign  |
| GO IMMUNOGLOBULIN     | 66  | 0.77 | 1.733 | 0.014 | 0.0348 | 0.903 | 7872 tags=71%, list=13%, sig  |
| GO SERINE HYDROLASE   | 186 | 0.36 | 1.473 | 0.014 | 0.1478 | 0.999 | 8238 tags=30%, list=14%, sig  |
| GO CELL CHEMOTAXIS    | 298 | 0.47 | 1.804 | 0.014 | 0.0198 | 0.779 | 6386 tags=33%, list=11%, sig  |
| GO POSITIVE REGULATI  | 26  | 0.61 | 1.768 | 0.014 | 0.0266 | 0.85  | 4352 tags=31%, list=7%, sign  |
| GO ENDOPEPTIDASE RE   | 187 | 0.4  | 1.54  | 0.014 | 0.1086 | 0.999 | 7209 tags=28%, list=12%, sig  |
| GO POSITIVE REGULATI  | 25  | 0.65 | 1.808 | 0.014 | 0.0193 | 0.77  | 10492 tags=76%, list=18%, sig |
| GO B CELL ACTIVATION  | 74  | 0.54 | 1.75  | 0.014 | 0.0302 | 0.876 | 5416 tags=34%, list=9%, sign  |
| GO LATE ENDOSOME TC   | 24  | 0.59 | 1.765 | 0.014 | 0.0272 | 0.855 | 5636 tags=38%, list=10%, sig  |
| GO POSITIVE REGULATI  | 30  | 0.62 | 1.827 | 0.014 | 0.0163 | 0.723 | 2542 tags=33%, list=4%, sign  |
| GO REGULATION OF AM   | 40  | 0.46 | 1.628 | 0.014 | 0.0685 | 0.985 | 6375 tags=38%, list=11%, sig  |
| GO REGULATION OF PEI  | 259 | 0.41 | 1.66  | 0.014 | 0.0561 | 0.972 | 7314 tags=31%, list=13%, sig  |
| GO MAINTENANCE OF F   | 23  | 0.56 | 1.726 | 0.015 | 0.0365 | 0.916 | 7037 tags=39%, list=12%, sig  |
| GO REGULATION OF EX   | 160 | 0.44 | 1.693 | 0.015 | 0.0451 | 0.949 | 3039 tags=22%, list=5%, sign  |
| GO PEPTIDYL TYROSINI  | 41  | 0.5  | 1.651 | 0.015 | 0.0594 | 0.977 | 7843 tags=41%, list=13%, sig  |
| GO POSITIVE REGULATI  | 58  | 0.41 | 1.588 | 0.015 | 0.0855 | 0.994 | 6828 tags=36%, list=12%, sig  |
| GO MODULATION BY HO   | 29  | 0.57 | 1.693 | 0.015 | 0.0451 | 0.949 | 5615 tags=34%, list=10%, sig  |
| GO INTRINSIC APOPTOI  | 42  | 0.52 | 1.662 | 0.016 | 0.0555 | 0.972 | 9734 tags=45%, list=17%, sig  |
| GO RESPONSE TO CHEM   | 94  | 0.57 | 1.8   | 0.016 | 0.0203 | 0.79  | 4110 tags=34%, list=7%, sign  |
| GO MEMBRANE INVAGI    | 129 | 0.59 | 1.747 | 0.016 | 0.031  | 0.883 | 8121 tags=57%, list=14%, sig  |
| GO CYSTEINE TYPE ENI  | 25  | 0.52 | 1.593 | 0.016 | 0.083  | 0.993 | 7800 tags=40%, list=13%, sig  |
| GO NEGATIVE REGULA    | 18  | 0.63 | 1.716 | 0.016 | 0.039  | 0.927 | 2846 tags=39%, list=5%, sign  |
| GO POSITIVE REGULATI  | 100 | 0.44 | 1.651 | 0.016 | 0.0595 | 0.977 | 5416 tags=28%, list=9%, sign  |
| GO POSITIVE REGULATI  | 16  | 0.66 | 1.727 | 0.016 | 0.0361 | 0.915 | 1644 tags=31%, list=3%, sign  |
| GO B CELL PROLIFERATI | 97  | 0.54 | 1.783 | 0.016 | 0.0235 | 0.822 | 5364 tags=34%, list=9%, sign  |
| GO TUMOR NECROSIS F   | 41  | 0.59 | 1.814 | 0.016 | 0.0183 | 0.751 | 8001 tags=46%, list=14%, sig  |
| GO UBIQUITIN BINDING  | 72  | 0.48 | 1.704 | 0.016 | 0.0424 | 0.936 | 2742 tags=24%, list=5%, sign  |
| GO LEUKOCYTE HOME     | 86  | 0.55 | 1.842 | 0.016 | 0.0149 | 0.7   | 8001 tags=45%, list=14%, sig  |
| GO MITOCHONDRIAL C'   | 21  | 0.65 | 1.721 | 0.017 | 0.0375 | 0.919 | 10686 tags=62%, list=18%, sig |
| GO NEGATIVE REGULA    | 264 | 0.37 | 1.516 | 0.017 | 0.1225 | 0.999 | 7829 tags=28%, list=13%, sig  |
| GO DETECTION OF BIOI  | 36  | 0.62 | 1.779 | 0.017 | 0.0244 | 0.827 | 5546 tags=44%, list=9%, sign  |
| GO VACUOLAR MEMBR     | 403 | 0.43 | 1.769 | 0.017 | 0.0263 | 0.849 | 7659 tags=34%, list=13%, sig  |
| GO MEMBRANE FUSION    | 156 | 0.41 | 1.619 | 0.017 | 0.0722 | 0.988 | 6323 tags=29%, list=11%, sig  |
| GO AMYLOID FIBRIL FC  | 18  | 0.58 | 1.683 | 0.017 | 0.0476 | 0.956 | 6008 tags=33%, list=10%, sig  |
| GO SNAP RECEPTOR AC   | 36  | 0.51 | 1.692 | 0.017 | 0.0452 | 0.949 | 6323 tags=42%, list=11%, sig  |
| GO APOPTOTIC PROCES   | 25  | 0.54 | 1.687 | 0.018 | 0.0467 | 0.954 | 3131 tags=32%, list=5%, sign  |
| GO GOLGI ASSOCIATED   | 175 | 0.46 | 1.721 | 0.018 | 0.0375 | 0.918 | 4459 tags=24%, list=8%, sign  |
| GO TERTIARY GRANULI   | 71  | 0.55 | 1.811 | 0.018 | 0.0188 | 0.763 | 4639 tags=41%, list=8%, sign  |
| GO POSITIVE REGULATI  | 193 | 0.42 | 1.662 | 0.018 | 0.0554 | 0.972 | 6471 tags=28%, list=11%, sig  |
| GO POSITIVE REGULATI  | 28  | 0.53 | 1.696 | 0.018 | 0.0446 | 0.946 | 6161 tags=36%, list=11%, sig  |
| GO OSTEOCLAST DIFFE   | 96  | 0.46 | 1.627 | 0.018 | 0.0687 | 0.985 | 7877 tags=42%, list=13%, sig  |
| GO POSITIVE REGULATI  | 366 | 0.34 | 1.487 | 0.018 | 0.1403 | 0.999 | 4124 tags=20%, list=7%, sign  |
| GO DNA SYNTHESIS INV  | 49  | 0.59 | 1.76  | 0.019 | 0.0283 | 0.864 | 9018 tags=47%, list=15%, sig  |
| GO VITAMIN BIOSYNTH   | 21  | 0.55 | 1.635 | 0.019 | 0.0656 | 0.982 | 5219 tags=33%, list=9%, sign  |
| GO ACTIVATION OF MA   | 151 | 0.38 | 1.54  | 0.019 | 0.1087 | 0.999 | 8568 tags=36%, list=15%, sig  |
| GO HOMEOSTASIS OF N   | 251 | 0.4  | 1.645 | 0.019 | 0.0613 | 0.979 | 6691 tags=28%, list=11%, sig  |
| GO NEGATIVE REGULA    | 33  | 0.51 | 1.609 | 0.019 | 0.0765 | 0.989 | 4694 tags=27%, list=8%, sign  |
| GO NUCLEOSIDE PHOSF   | 71  | 0.4  | 1.546 | 0.019 | 0.105  | 0.998 | 10440 tags=45%, list=18%, sig |
| GO PROTEIN MATURATI   | 277 | 0.33 | 1.448 | 0.019 | 0.162  | 0.999 | 8256 tags=27%, list=14%, sig  |
| GO POSITIVE REGULATI  | 25  | 0.6  | 1.723 | 0.02  | 0.0374 | 0.918 | 8559 tags=56%, list=15%, sig  |
| GO IRON ION TRANSPOI  | 77  | 0.43 | 1.643 | 0.02  | 0.0621 | 0.979 | 9251 tags=40%, list=16%, sig  |
| GO LYMPH NODE DEVE    | 17  | 0.65 | 1.777 | 0.02  | 0.0248 | 0.832 | 7717 tags=53%, list=13%, sig  |

|             |                      |     |      |       |       |        |       |       |                         |
|-------------|----------------------|-----|------|-------|-------|--------|-------|-------|-------------------------|
| GO POSITIV  | GO POSITIVE REGULATI | 51  | 0.5  | 1.684 | 0.02  | 0.0476 | 0.956 | 7972  | tags=45%, list=14%, sig |
| GO POSITIV  | GO POSITIVE REGULATI | 57  | 0.45 | 1.618 | 0.02  | 0.0721 | 0.988 | 4938  | tags=33%, list=8%, sign |
| GO LATE EN  | GO LATE ENDOSOME TC  | 17  | 0.59 | 1.677 | 0.02  | 0.05   | 0.963 | 3870  | tags=35%, list=7%, sign |
| GO REGULA   | GO REGULATION OF TR  | 22  | 0.55 | 1.613 | 0.02  | 0.0746 | 0.988 | 1169  | tags=23%, list=2%, sign |
| GO SIGNAL   | GO SIGNAL TRANSDUC   | 74  | 0.44 | 1.598 | 0.02  | 0.081  | 0.992 | 7662  | tags=34%, list=13%, sig |
| GO POSITIV  | GO POSITIVE REGULATI | 85  | 0.4  | 1.554 | 0.021 | 0.1014 | 0.996 | 8753  | tags=39%, list=15%, sig |
| GO REGULA   | GO REGULATION OF T C | 42  | 0.56 | 1.762 | 0.021 | 0.0276 | 0.86  | 2846  | tags=31%, list=5%, sign |
| GO B CELL I | GO B CELL RECEPTOR S | 121 | 0.68 | 1.776 | 0.021 | 0.0249 | 0.833 | 7872  | tags=56%, list=13%, sig |
| GO NEGATI'  | GO NEGATIVE REGULA'  | 81  | 0.41 | 1.578 | 0.021 | 0.0903 | 0.996 | 6716  | tags=32%, list=12%, sig |
| GO PURINE   | GO PURINE CONTAININ  | 49  | 0.45 | 1.604 | 0.021 | 0.0783 | 0.992 | 2599  | tags=24%, list=4%, sign |
| GO PYRIMII  | GO PYRIMIDINE CONTA  | 81  | 0.43 | 1.612 | 0.021 | 0.0749 | 0.989 | 9155  | tags=41%, list=16%, sig |
| GO NEGATI'  | GO NEGATIVE REGULA'  | 60  | 0.42 | 1.553 | 0.021 | 0.1016 | 0.996 | 7614  | tags=32%, list=13%, sig |
| GO HEXOSE   | GO HEXOSE CATABOLIC  | 54  | 0.49 | 1.657 | 0.021 | 0.0574 | 0.973 | 4282  | tags=30%, list=7%, sign |
| GO ENDOLY   | GO ENDOLYSOSOME      | 20  | 0.62 | 1.714 | 0.021 | 0.0394 | 0.928 | 4279  | tags=40%, list=7%, sign |
| GO ORGANE   | GO ORGANELLE MEMBI   | 100 | 0.45 | 1.645 | 0.021 | 0.0614 | 0.979 | 6267  | tags=33%, list=11%, sig |
| GO FIBROBI  | GO FIBROBLAST PROLI  | 83  | 0.41 | 1.562 | 0.021 | 0.0984 | 0.996 | 6729  | tags=34%, list=12%, sig |
| GO B CELL I | GO B CELL HOMEOSTAS  | 29  | 0.63 | 1.749 | 0.022 | 0.0306 | 0.879 | 2630  | tags=28%, list=5%, sign |
| GO REGULA   | GO REGULATION OF STI | 117 | 0.49 | 1.704 | 0.022 | 0.0425 | 0.936 | 4080  | tags=26%, list=7%, sign |
| GO CARD D   | GO CARD DOMAIN BINI  | 15  | 0.65 | 1.739 | 0.022 | 0.0332 | 0.894 | 1465  | tags=33%, list=3%, sign |
| GO RESPON   | GO RESPONSE TO MUR   | 18  | 0.61 | 1.695 | 0.023 | 0.0447 | 0.946 | 11765 | tags=67%, list=20%, sig |
| GO INTES    | GO INTESTINAL EPITHE | 15  | 0.62 | 1.643 | 0.023 | 0.0622 | 0.979 | 8888  | tags=47%, list=15%, sig |
| GO CELL CE  | GO CELL CELL ADHESIC | 16  | 0.69 | 1.701 | 0.023 | 0.0432 | 0.939 | 3663  | tags=38%, list=6%, sign |
| GO PROTEA   | GO PROTEASOME ACCE   | 24  | 0.72 | 1.759 | 0.023 | 0.0282 | 0.864 | 2348  | tags=33%, list=4%, sign |
| GO CELLUL   | GO CELLULAR MODIFIE  | 184 | 0.34 | 1.432 | 0.023 | 0.1725 | 0.999 | 8059  | tags=31%, list=14%, sig |
| GO POSITIV  | GO POSITIVE REGULATI | 19  | 0.65 | 1.711 | 0.024 | 0.0404 | 0.929 | 9845  | tags=68%, list=17%, sig |
| GO NEGATI'  | GO NEGATIVE REGULA'  | 16  | 0.59 | 1.69  | 0.024 | 0.046  | 0.952 | 5785  | tags=31%, list=10%, sig |
| GO REGULA   | GO REGULATION OF IN  | 159 | 0.37 | 1.528 | 0.024 | 0.1155 | 0.999 | 7829  | tags=31%, list=13%, sig |
| GO PHOSPH   | GO PHOSPHATIDYLINO   | 76  | 0.38 | 1.467 | 0.024 | 0.1511 | 0.999 | 4380  | tags=25%, list=8%, sign |
| GO DISULFI  | GO DISULFIDE OXIDORI | 38  | 0.52 | 1.687 | 0.024 | 0.0469 | 0.955 | 6732  | tags=39%, list=12%, sig |
| GO AMYLOI   | GO AMYLOID PRECURS   | 50  | 0.42 | 1.566 | 0.024 | 0.0965 | 0.996 | 6375  | tags=32%, list=11%, sig |
| GO CELLUL   | GO CELLULAR PIGMEN   | 52  | 0.46 | 1.664 | 0.024 | 0.0548 | 0.969 | 9027  | tags=40%, list=15%, sig |
| GO POSITIV  | GO POSITIVE REGULATI | 90  | 0.4  | 1.539 | 0.024 | 0.1087 | 0.999 | 2824  | tags=21%, list=5%, sign |
| GO MAP KIN  | GO MAP KINASE KINAS  | 22  | 0.57 | 1.693 | 0.025 | 0.0451 | 0.949 | 5542  | tags=36%, list=9%, sign |
| GO SOMATI   | GO SOMATIC DIVERSIFI | 60  | 0.5  | 1.649 | 0.025 | 0.0603 | 0.977 | 4441  | tags=30%, list=8%, sign |
| GO ACUTE F  | GO ACUTE PHASE RESP  | 47  | 0.55 | 1.638 | 0.025 | 0.0641 | 0.982 | 9190  | tags=49%, list=16%, sig |
| GO POSITIV  | GO POSITIVE REGULATI | 37  | 0.49 | 1.648 | 0.025 | 0.0605 | 0.977 | 2630  | tags=24%, list=5%, sign |
| GO INTERA   | GO INTERACTION WITH  | 92  | 0.43 | 1.572 | 0.025 | 0.0937 | 0.996 | 7298  | tags=32%, list=12%, sig |
| GO VACUOI   | GO VACUOLAR ACIDIFI  | 23  | 0.55 | 1.634 | 0.025 | 0.0659 | 0.983 | 8159  | tags=52%, list=14%, sig |
| GO INNATE   | GO INNATE IMMUNE RE  | 17  | 0.63 | 1.548 | 0.026 | 0.1043 | 0.998 | 8589  | tags=53%, list=15%, sig |
| GO PROTEIN  | GO PROTEIN INSERTION | 61  | 0.45 | 1.578 | 0.026 | 0.0904 | 0.996 | 7432  | tags=36%, list=13%, sig |
| GO REGULA   | GO REGULATION OF PEI | 23  | 0.57 | 1.591 | 0.026 | 0.084  | 0.994 | 10532 | tags=48%, list=18%, sig |
| GO REGULA   | GO REGULATION OF MI  | 44  | 0.48 | 1.578 | 0.026 | 0.0902 | 0.996 | 9259  | tags=52%, list=16%, sig |
| GO ACTIVA'  | GO ACTIVATION OF JUN | 37  | 0.47 | 1.56  | 0.026 | 0.099  | 0.996 | 6471  | tags=41%, list=11%, sig |
| GO CYTOPL   | GO CYTOPLASMIC SIDE  | 15  | 0.56 | 1.574 | 0.026 | 0.0924 | 0.996 | 7383  | tags=60%, list=13%, sig |
| GO MULTIV   | GO MULTIVESICULAR B  | 39  | 0.5  | 1.701 | 0.026 | 0.0433 | 0.939 | 5636  | tags=41%, list=10%, sig |
| GO REGULA   | GO REGULATION OF MA  | 42  | 0.53 | 1.692 | 0.027 | 0.0455 | 0.951 | 3075  | tags=36%, list=5%, sign |
| GO REGULA   | GO REGULATION OF RE  | 27  | 0.51 | 1.591 | 0.027 | 0.0841 | 0.994 | 5785  | tags=33%, list=10%, sig |
| GO MITOTIC  | GO MITOTIC CYTOKINE  | 23  | 0.57 | 1.661 | 0.027 | 0.0559 | 0.972 | 7430  | tags=39%, list=13%, sig |
| GO POSITIV  | GO POSITIVE REGULATI | 21  | 0.59 | 1.688 | 0.028 | 0.0467 | 0.954 | 3483  | tags=38%, list=6%, sign |
| GO CELLUL   | GO CELLULAR OXIDAN'  | 96  | 0.39 | 1.518 | 0.028 | 0.1208 | 0.999 | 5400  | tags=26%, list=9%, sign |
| GO NUCLEC   | GO NUCLEOTIDE EXCIS  | 29  | 0.57 | 1.691 | 0.028 | 0.0455 | 0.951 | 8544  | tags=45%, list=15%, sig |
| GO PHOSPH   | GO PHOSPHATIDYLINO   | 19  | 0.59 | 1.677 | 0.028 | 0.0498 | 0.962 | 3076  | tags=37%, list=5%, sign |
| GO NEGATI'  | GO NEGATIVE REGULA'  | 204 | 0.33 | 1.404 | 0.028 | 0.1931 | 0.999 | 7003  | tags=25%, list=12%, sig |
| GO REGULA   | GO REGULATION OF MY  | 52  | 0.47 | 1.607 | 0.028 | 0.0772 | 0.991 | 5416  | tags=37%, list=9%, sign |
| GO PURINEI  | GO PURINERGIC NUCLE  | 32  | 0.58 | 1.698 | 0.029 | 0.0439 | 0.941 | 6701  | tags=44%, list=11%, sig |
| GO BENZEN   | GO BENZENE CONTAINI  | 23  | 0.51 | 1.539 | 0.029 | 0.1088 | 0.999 | 5608  | tags=35%, list=10%, sig |
| GO SECOND   | GO SECONDARY LYSOS   | 16  | 0.63 | 1.607 | 0.029 | 0.0771 | 0.991 | 8159  | tags=56%, list=14%, sig |
| GO PROTEIN  | GO PROTEIN K63 LINKE | 56  | 0.46 | 1.635 | 0.029 | 0.0655 | 0.982 | 8055  | tags=39%, list=14%, sig |

|                                  |     |      |       |       |        |       |                               |
|----------------------------------|-----|------|-------|-------|--------|-------|-------------------------------|
| GO POSITIV GO POSITIVE REGULATI  | 23  | 0.56 | 1.588 | 0.029 | 0.0856 | 0.994 | 8593 tags=43%, list=15%, sig  |
| GO SOMATI GO SOMATIC RECOMBII    | 50  | 0.52 | 1.67  | 0.03  | 0.0524 | 0.968 | 3991 tags=30%, list=7%, sign  |
| GO PYRIMII GO PYRIMIDINE CONTA   | 38  | 0.51 | 1.684 | 0.03  | 0.0474 | 0.955 | 7852 tags=37%, list=13%, sig  |
| GO TOLL LI GO TOLL LIKE RECEPTC  | 39  | 0.53 | 1.645 | 0.03  | 0.0614 | 0.979 | 5939 tags=49%, list=10%, sig  |
| GO POSITIV GO POSITIVE REGULATI  | 27  | 0.54 | 1.562 | 0.03  | 0.0982 | 0.996 | 6389 tags=41%, list=11%, sig  |
| GO CYTOPL GO CYTOPLASMIC SIDE    | 184 | 0.37 | 1.517 | 0.03  | 0.1213 | 0.999 | 7643 tags=34%, list=13%, sig  |
| GO MEMBR. GO MEMBRANE PROTEI     | 60  | 0.47 | 1.645 | 0.03  | 0.0614 | 0.979 | 6075 tags=35%, list=10%, sig  |
| GO MODUL GO MODULATION OF PF     | 112 | 0.43 | 1.564 | 0.03  | 0.0974 | 0.996 | 7298 tags=34%, list=12%, sig  |
| GO NEGATI GO NEGATIVE REGULA     | 39  | 0.47 | 1.536 | 0.03  | 0.111  | 0.999 | 5216 tags=26%, list=9%, sign  |
| GO REGULA GO REGULATION OF ME    | 85  | 0.41 | 1.531 | 0.03  | 0.113  | 0.999 | 9399 tags=40%, list=16%, sig  |
| GO MONON GO MONONUCLEAR CEI      | 91  | 0.54 | 1.736 | 0.03  | 0.0341 | 0.899 | 5097 tags=38%, list=9%, sign  |
| GO NEGATI GO NEGATIVE REGULA     | 119 | 0.35 | 1.417 | 0.03  | 0.1837 | 0.999 | 4977 tags=21%, list=9%, sign  |
| GO ACUTE I GO ACUTE INFLAMMAT    | 23  | 0.6  | 1.694 | 0.03  | 0.0451 | 0.949 | 7243 tags=43%, list=12%, sig  |
| GO CD40 SIC GO CD40 SIGNALING PA | 15  | 0.62 | 1.653 | 0.03  | 0.0585 | 0.974 | 2354 tags=40%, list=4%, sign  |
| GO NEGATI GO NEGATIVE REGULA     | 19  | 0.59 | 1.587 | 0.03  | 0.0855 | 0.994 | 6181 tags=32%, list=11%, sig  |
| GO RESPON GO RESPONSE TO GAMM    | 53  | 0.45 | 1.605 | 0.031 | 0.0778 | 0.991 | 3397 tags=25%, list=6%, sign  |
| GO NEGATI GO NEGATIVE REGULA     | 51  | 0.44 | 1.558 | 0.031 | 0.0996 | 0.996 | 6716 tags=33%, list=12%, sig  |
| GO REGULA GO REGULATION OF PR    | 24  | 0.53 | 1.595 | 0.031 | 0.0825 | 0.993 | 5482 tags=29%, list=9%, sign  |
| GO NEGATI GO NEGATIVE REGULA     | 38  | 0.47 | 1.555 | 0.031 | 0.1013 | 0.996 | 2711 tags=24%, list=5%, sign  |
| GO DEOXYF GO DEOXYRIBOSE PHO     | 20  | 0.59 | 1.656 | 0.031 | 0.0577 | 0.973 | 6751 tags=50%, list=12%, sig  |
| GO NEGATI GO NEGATIVE REGULA     | 21  | 0.48 | 1.548 | 0.032 | 0.1044 | 0.998 | 9091 tags=43%, list=16%, sig  |
| GO FICOLIN GO FICOLIN 1 RICH GRA | 57  | 0.52 | 1.677 | 0.032 | 0.0498 | 0.961 | 8559 tags=47%, list=15%, sig  |
| GO POSITIV GO POSITIVE REGULATI  | 30  | 0.52 | 1.656 | 0.032 | 0.0576 | 0.973 | 6161 tags=37%, list=11%, sig  |
| GO COATED GO COATED VESICLE      | 290 | 0.41 | 1.63  | 0.032 | 0.0678 | 0.985 | 4653 tags=22%, list=8%, sign  |
| GO NEGATI GO NEGATIVE REGULA     | 20  | 0.61 | 1.655 | 0.032 | 0.0579 | 0.974 | 2489 tags=40%, list=4%, sign  |
| GO LRR DO GO LRR DOMAIN BINDII   | 16  | 0.58 | 1.62  | 0.033 | 0.0718 | 0.987 | 3028 tags=31%, list=5%, sign  |
| GO SPECIFK GO SPECIFIC GRANULE   | 89  | 0.48 | 1.702 | 0.033 | 0.0431 | 0.937 | 4639 tags=35%, list=8%, sign  |
| GO REGULA GO REGULATION OF CH    | 223 | 0.4  | 1.585 | 0.033 | 0.0863 | 0.994 | 6386 tags=32%, list=11%, sig  |
| GO CYTOKI GO CYTOKINE BINDING    | 134 | 0.51 | 1.655 | 0.033 | 0.0579 | 0.974 | 8001 tags=37%, list=14%, sig  |
| GO REGULA GO REGULATION OF MA    | 23  | 0.56 | 1.609 | 0.033 | 0.0763 | 0.989 | 6083 tags=35%, list=10%, sig  |
| GO IMMUN GO IMMUNOGLOBULIN       | 23  | 0.67 | 1.651 | 0.033 | 0.0593 | 0.977 | 4939 tags=43%, list=8%, sign  |
| GO NEGATI GO NEGATIVE REGULA     | 106 | 0.42 | 1.563 | 0.033 | 0.0981 | 0.996 | 3003 tags=20%, list=5%, sign  |
| GO PHAGOC GO PHAGOCYTOSIS REC    | 74  | 0.7  | 1.675 | 0.034 | 0.0505 | 0.966 | 7872 tags=64%, list=13%, sig  |
| GO DEFENS GO DEFENSE RESPONSE    | 41  | 0.52 | 1.544 | 0.034 | 0.1064 | 0.998 | 7298 tags=39%, list=12%, sig  |
| GO SIGNALI GO SIGNALING RECEPT   | 41  | 0.47 | 1.568 | 0.034 | 0.0958 | 0.996 | 2179 tags=29%, list=4%, sign  |
| GO NEGATI GO NEGATIVE REGULA     | 102 | 0.38 | 1.487 | 0.034 | 0.1404 | 0.999 | 7843 tags=36%, list=13%, sig  |
| GO HETERO GO HETEROTYPIC CELL    | 62  | 0.47 | 1.599 | 0.034 | 0.0805 | 0.992 | 7662 tags=34%, list=13%, sig  |
| GO PROTEIN GO PROTEIN TRIMERIZA  | 17  | 0.55 | 1.556 | 0.034 | 0.1008 | 0.996 | 4152 tags=29%, list=7%, sign  |
| GO TRANS C GO TRANS GOLGI NETW   | 225 | 0.39 | 1.587 | 0.034 | 0.0857 | 0.994 | 4982 tags=24%, list=9%, sign  |
| GO REGULA GO REGULATION OF MC    | 181 | 0.4  | 1.559 | 0.034 | 0.0992 | 0.996 | 3994 tags=21%, list=7%, sign  |
| GO PROTEIN GO PROTEIN PROCESSIN  | 213 | 0.35 | 1.449 | 0.035 | 0.1619 | 0.999 | 8256 tags=28%, list=14%, sig  |
| GO SIGNALI GO SIGNALING ADAPTC   | 67  | 0.44 | 1.597 | 0.035 | 0.0817 | 0.992 | 2179 tags=25%, list=4%, sign  |
| GO NEGATI GO NEGATIVE REGULA     | 27  | 0.49 | 1.622 | 0.035 | 0.0707 | 0.987 | 7903 tags=56%, list=14%, sig  |
| GO REGULA GO REGULATION OF SPI   | 17  | 0.53 | 1.569 | 0.035 | 0.0951 | 0.996 | 6670 tags=47%, list=11%, sig  |
| GO PHAGOL GO PHAGOLYSOSOME A     | 15  | 0.54 | 1.554 | 0.035 | 0.1015 | 0.996 | 11162 tags=73%, list=19%, sig |
| GO RESPON GO RESPONSE TO OXID.   | 446 | 0.32 | 1.43  | 0.035 | 0.1736 | 0.999 | 5802 tags=22%, list=10%, sig  |
| GO CLATHR GO CLATHRIN COATED     | 190 | 0.38 | 1.51  | 0.036 | 0.1262 | 0.999 | 4653 tags=22%, list=8%, sign  |
| GO FOAM C GO FOAM CELL DIFFERI   | 37  | 0.5  | 1.61  | 0.037 | 0.076  | 0.989 | 2748 tags=22%, list=5%, sign  |
| GO ORGAN GO ORGANOPHOSPHAT       | 141 | 0.34 | 1.414 | 0.037 | 0.185  | 0.999 | 8569 tags=32%, list=15%, sig  |
| GO POSITIV GO POSITIVE REGULATI  | 34  | 0.5  | 1.604 | 0.037 | 0.0781 | 0.991 | 7432 tags=47%, list=13%, sig  |
| GO PEPTIDY GO PEPTIDYL TYROSINI  | 373 | 0.36 | 1.487 | 0.037 | 0.1403 | 0.999 | 7949 tags=30%, list=14%, sig  |
| GO MAST CI GO MAST CELL ACTIVA   | 59  | 0.53 | 1.695 | 0.037 | 0.0448 | 0.946 | 3188 tags=36%, list=5%, sign  |
| GO DENDRI GO DENDRITIC CELL CE   | 24  | 0.6  | 1.646 | 0.037 | 0.0611 | 0.977 | 8001 tags=50%, list=14%, sig  |
| GO REGULA GO REGULATION OF OX    | 114 | 0.36 | 1.434 | 0.038 | 0.171  | 0.999 | 7462 tags=29%, list=13%, sig  |
| GO REGULA GO REGULATION OF NE    | 41  | 0.54 | 1.695 | 0.038 | 0.0447 | 0.946 | 6161 tags=39%, list=11%, sig  |
| GO LYSOSO GO LYSOSOME LOCALIZ    | 71  | 0.44 | 1.59  | 0.038 | 0.0847 | 0.994 | 7851 tags=45%, list=13%, sig  |
| GO AZUROP GO AZUROPHIL GRANU     | 150 | 0.43 | 1.624 | 0.038 | 0.07   | 0.986 | 9621 tags=43%, list=16%, sig  |
| GO REGULA GO REGULATION OF HE    | 26  | 0.53 | 1.602 | 0.038 | 0.0792 | 0.992 | 7662 tags=42%, list=13%, sig  |

|             |                       |     |      |       |       |        |       |       |                         |
|-------------|-----------------------|-----|------|-------|-------|--------|-------|-------|-------------------------|
| GO POSITIV  | GO POSITIVE REGULATI  | 149 | 0.42 | 1.568 | 0.038 | 0.0958 | 0.996 | 5416  | tags=26%, list=9%, sign |
| GO VESICLE  | GO VESICLE ORGANIZA   | 326 | 0.38 | 1.561 | 0.038 | 0.0989 | 0.996 | 4727  | tags=25%, list=8%, sign |
| GO EARLY I  | GO EARLY ENDOSOME     | 359 | 0.38 | 1.558 | 0.038 | 0.0995 | 0.996 | 4527  | tags=21%, list=8%, sign |
| GO MATURI   | GO MATURE B CELL DIF  | 22  | 0.59 | 1.542 | 0.038 | 0.1077 | 0.999 | 8719  | tags=50%, list=15%, sig |
| GO POSITIV  | GO POSITIVE REGULATI  | 23  | 0.51 | 1.548 | 0.039 | 0.1046 | 0.998 | 11877 | tags=57%, list=20%, sig |
| GO POSITIV  | GO POSITIVE REGULATI  | 20  | 0.51 | 1.529 | 0.039 | 0.1144 | 0.999 | 2807  | tags=25%, list=5%, sign |
| GO UNSATU   | GO UNSATURATED FAT    | 116 | 0.36 | 1.465 | 0.039 | 0.1525 | 0.999 | 7814  | tags=29%, list=13%, sig |
| GO POSITIV  | GO POSITIVE REGULATI  | 17  | 0.55 | 1.595 | 0.039 | 0.0825 | 0.993 | 7615  | tags=53%, list=13%, sig |
| GO NEGATI'  | GO NEGATIVE REGULA'   | 16  | 0.6  | 1.577 | 0.039 | 0.0908 | 0.996 | 2873  | tags=25%, list=5%, sign |
| GO ENDOPL   | GO ENDOPLASMIC RETI   | 72  | 0.48 | 1.62  | 0.039 | 0.0717 | 0.987 | 2856  | tags=24%, list=5%, sign |
| GO UBIQUITI | GO UBIQUITIN LIKE PRO | 90  | 0.43 | 1.558 | 0.04  | 0.0995 | 0.996 | 2742  | tags=20%, list=5%, sign |
| GO RESPON   | GO RESPONSE TO HYDR   | 18  | 0.5  | 1.496 | 0.04  | 0.135  | 0.999 | 1641  | tags=28%, list=3%, sign |
| GO ERROR I  | GO ERROR FREE TRANS   | 21  | 0.63 | 1.603 | 0.04  | 0.0789 | 0.992 | 9018  | tags=52%, list=15%, sig |
| GO RESPON   | GO RESPONSE TO OXYC   | 387 | 0.33 | 1.439 | 0.041 | 0.1677 | 0.999 | 6166  | tags=23%, list=11%, sig |
| GO IRON IO  | GO IRON ION HOMEOST   | 84  | 0.38 | 1.478 | 0.041 | 0.1449 | 0.999 | 4769  | tags=23%, list=8%, sign |
| GO CELLUL   | GO CELLULAR SENESCE   | 75  | 0.43 | 1.535 | 0.041 | 0.1113 | 0.999 | 4893  | tags=23%, list=8%, sign |
| GO SYNCYT   | GO SYNCYTIUM FORMA    | 55  | 0.48 | 1.539 | 0.041 | 0.1087 | 0.999 | 3679  | tags=25%, list=6%, sign |
| GO POSITIV  | GO POSITIVE REGULATI  | 141 | 0.44 | 1.611 | 0.041 | 0.0755 | 0.989 | 6386  | tags=38%, list=11%, sig |
| GO SOMATI   | GO SOMATIC DIVERSIFI  | 70  | 0.47 | 1.563 | 0.041 | 0.0979 | 0.996 | 4441  | tags=27%, list=8%, sign |
| GO MORPH    | GO MORPHOGENESIS OI   | 144 | 0.42 | 1.545 | 0.042 | 0.1059 | 0.998 | 5095  | tags=24%, list=9%, sign |
| GO MODUL    | GO MODULATION BY HO   | 17  | 0.58 | 1.601 | 0.042 | 0.0793 | 0.992 | 5615  | tags=35%, list=10%, sig |
| GO RRNA C   | GO RRNA CATABOLIC P   | 20  | 0.56 | 1.624 | 0.042 | 0.07   | 0.986 | 11964 | tags=55%, list=20%, sig |
| GO REPLISC  | GO REPLISOME          | 26  | 0.63 | 1.645 | 0.042 | 0.0615 | 0.979 | 6794  | tags=46%, list=12%, sig |
| GO POST TR  | GO POST TRANSLATION   | 356 | 0.36 | 1.486 | 0.042 | 0.1408 | 0.999 | 4674  | tags=21%, list=8%, sign |
| GO PROTEA   | GO PROTEASE BINDING   | 133 | 0.41 | 1.521 | 0.042 | 0.1199 | 0.999 | 6375  | tags=34%, list=11%, sig |
| GO MYELOI   | GO MYELOID CELL HOM   | 150 | 0.37 | 1.493 | 0.042 | 0.137  | 0.999 | 5377  | tags=23%, list=9%, sign |
| GO POSITIV  | GO POSITIVE REGULATI  | 64  | 0.41 | 1.461 | 0.043 | 0.1541 | 0.999 | 9259  | tags=42%, list=16%, sig |
| GO POSITIV  | GO POSITIVE REGULATI  | 46  | 0.47 | 1.547 | 0.043 | 0.1046 | 0.998 | 2198  | tags=28%, list=4%, sign |
| GO B CELL I | GO B CELL DIFFERENTL  | 135 | 0.44 | 1.549 | 0.044 | 0.1037 | 0.998 | 9075  | tags=38%, list=16%, sig |
| GO ANTIOX   | GO ANTIOXIDANT ACTI   | 79  | 0.41 | 1.505 | 0.045 | 0.1289 | 0.999 | 5400  | tags=28%, list=9%, sign |
| GO POSITIV  | GO POSITIVE REGULATI  | 19  | 0.54 | 1.555 | 0.045 | 0.1009 | 0.996 | 2052  | tags=26%, list=4%, sign |
| GO ICOSAN   | GO ICOSANOID METABO   | 121 | 0.35 | 1.426 | 0.045 | 0.1762 | 0.999 | 7814  | tags=29%, list=13%, sig |
| GO GLYCOS   | GO GLYCOSYL COMPOU    | 40  | 0.5  | 1.627 | 0.045 | 0.0689 | 0.985 | 7852  | tags=38%, list=13%, sig |
| GO HYDROI   | GO HYDROLASE ACTIVI   | 126 | 0.36 | 1.453 | 0.045 | 0.1593 | 0.999 | 6465  | tags=32%, list=11%, sig |
| GO REGULA   | GO REGULATION OF SU   | 22  | 0.57 | 1.603 | 0.045 | 0.0789 | 0.992 | 6444  | tags=50%, list=11%, sig |
| GO UBIQUITI | GO UBIQUITIN LIKE PRO | 307 | 0.4  | 1.577 | 0.045 | 0.0909 | 0.996 | 4306  | tags=23%, list=7%, sign |
| GO POSITIV  | GO POSITIVE REGULATI  | 80  | 0.43 | 1.534 | 0.045 | 0.1115 | 0.999 | 6506  | tags=31%, list=11%, sig |
| GO MONOS    | GO MONOSACCHARIDE     | 64  | 0.43 | 1.482 | 0.045 | 0.1429 | 0.999 | 4282  | tags=25%, list=7%, sign |
| GO MYOBL    | GO MYOBLAST FUSION    | 40  | 0.49 | 1.552 | 0.045 | 0.1022 | 0.996 | 3679  | tags=25%, list=6%, sign |
| GO REGULA   | GO REGULATION OF CA   | 97  | 0.42 | 1.534 | 0.046 | 0.1114 | 0.999 | 2723  | tags=21%, list=5%, sign |
| GO POSITIV  | GO POSITIVE REGULATI  | 20  | 0.61 | 1.624 | 0.046 | 0.07   | 0.986 | 3436  | tags=35%, list=6%, sign |
| GO DETOXI   | GO DETOXIFICATION     | 129 | 0.35 | 1.423 | 0.046 | 0.1786 | 0.999 | 6151  | tags=24%, list=11%, sig |
| GO PATTERN  | GO PATTERN RECOGNI    | 23  | 0.61 | 1.62  | 0.046 | 0.0718 | 0.987 | 4795  | tags=43%, list=8%, sign |
| GO PROTEIN  | GO PROTEIN HOMOTETI   | 59  | 0.4  | 1.458 | 0.047 | 0.1562 | 0.999 | 7756  | tags=27%, list=13%, sig |
| GO REGULA   | GO REGULATION OF DE   | 19  | 0.51 | 1.508 | 0.047 | 0.1269 | 0.999 | 4977  | tags=32%, list=9%, sign |
| GO BLOOD I  | GO BLOOD MICROPART    | 146 | 0.48 | 1.562 | 0.047 | 0.0983 | 0.996 | 7462  | tags=36%, list=13%, sig |
| GO POSITIV  | GO POSITIVE REGULATI  | 17  | 0.55 | 1.559 | 0.047 | 0.0992 | 0.996 | 8900  | tags=47%, list=15%, sig |
| GO ESTABL   | GO ESTABLISHMENT OF   | 123 | 0.45 | 1.579 | 0.047 | 0.0899 | 0.996 | 4089  | tags=24%, list=7%, sign |
| GO AZUROPH  | GO AZUROPHIL GRANU    | 56  | 0.49 | 1.592 | 0.047 | 0.0838 | 0.994 | 4415  | tags=30%, list=8%, sign |
| GO REGULA   | GO REGULATION OF ER   | 49  | 0.44 | 1.508 | 0.047 | 0.1269 | 0.999 | 6297  | tags=29%, list=11%, sig |
| GO POSITIV  | GO POSITIVE REGULATI  | 127 | 0.43 | 1.608 | 0.047 | 0.0766 | 0.989 | 4469  | tags=24%, list=8%, sign |
| GO P38MAP   | GO P38MAPK CASCADE    | 51  | 0.41 | 1.446 | 0.048 | 0.1627 | 0.999 | 6093  | tags=35%, list=10%, sig |
| GO PHOSPH   | GO PHOSPHATIDYLINO    | 38  | 0.46 | 1.498 | 0.048 | 0.1339 | 0.999 | 8059  | tags=42%, list=14%, sig |
| GO POSITIV  | GO POSITIVE REGULATI  | 35  | 0.49 | 1.49  | 0.048 | 0.1387 | 0.999 | 3679  | tags=20%, list=6%, sign |
| GO CELL RE  | GO CELL REDOX HOME    | 55  | 0.45 | 1.535 | 0.048 | 0.1112 | 0.999 | 5126  | tags=29%, list=9%, sign |
| GO PYRIMID  | GO PYRIMIDINE DEOXY   | 18  | 0.6  | 1.58  | 0.049 | 0.0893 | 0.996 | 7756  | tags=56%, list=13%, sig |
| GO NEGATI'  | GO NEGATIVE REGULA'   | 36  | 0.47 | 1.478 | 0.049 | 0.145  | 0.999 | 2875  | tags=25%, list=5%, sign |
| GO NUCLEC   | GO NUCLEOSIDE TRIPH   | 61  | 0.4  | 1.482 | 0.049 | 0.1427 | 0.999 | 8789  | tags=39%, list=15%, sig |



|            |                    |     |      |       |      |        |       |      |                         |
|------------|--------------------|-----|------|-------|------|--------|-------|------|-------------------------|
| GO EXTRAC  | GO EXTRACELLULAR V | 21  | 0.5  | 1.551 | 0.05 | 0.103  | 0.997 | 5938 | tags=33%, list=10%, sig |
| GO REACTIV | GO REACTIVE OXYGEN | 122 | 0.37 | 1.469 | 0.05 | 0.1499 | 0.999 | 3483 | tags=24%, list=6%, sign |

---

al=61%  
nal=63%  
al=43%  
al=47%  
al=65%  
al=50%  
al=47%  
al=40%  
al=49%  
al=45%  
al=58%  
nal=62%  
al=48%  
al=59%  
al=43%  
al=50%  
al=47%  
al=67%  
al=40%  
al=50%  
al=42%  
al=40%  
al=54%  
al=54%  
nal=61%  
al=56%  
nal=47%  
al=56%  
nal=46%  
al=46%  
al=48%  
al=49%  
nal=56%  
al=65%  
al=47%  
al=56%  
al=52%  
al=48%  
al=42%  
al=47%  
nal=66%  
al=40%  
al=59%  
nal=46%  
nal=57%  
al=43%  
al=50%  
nal=58%  
al=49%  
al=53%  
al=54%  
al=44%  
nal=82%  
al=61%  
al=63%  
al=56%  
al=37%

al=43%  
al=65%  
al=67%  
al=49%  
al=69%  
nal=53%  
nal=49%  
al=57%  
nal=50%  
al=33%  
al=43%  
al=44%  
al=41%  
al=43%  
al=45%  
nal=52%  
nal=69%  
al=89%  
nal=47%  
al=50%  
al=39%  
nal=59%  
nal=68%  
nal=76%  
al=42%  
al=42%  
al=50%  
nal=43%  
al=42%  
al=53%  
nal=63%  
nal=58%  
al=44%  
nal=51%  
al=40%  
al=39%  
al=39%  
al=50%  
al=38%  
nal=58%  
al=45%  
al=42%  
al=38%  
al=42%  
al=60%  
al=38%  
al=65%  
al=40%  
al=42%  
al=45%  
al=43%  
nal=73%  
al=42%  
al=47%  
al=59%  
al=77%  
al=42%  
nal=42%

nal=56%  
al=42%  
al=39%  
al=58%  
nal=65%  
nal=51%  
nal=43%  
al=64%  
al=36%  
al=40%  
al=39%  
al=43%  
al=44%  
al=51%  
al=63%  
nal=53%  
al=37%  
nal=46%  
al=51%  
al=34%  
nal=52%  
al=39%  
al=41%  
al=44%  
al=35%  
al=43%  
nal=55%  
nal=46%  
nal=46%  
nal=47%  
al=41%  
al=37%  
al=38%  
al=57%  
nal=52%  
al=39%  
al=53%  
nal=53%  
nal=73%  
al=33%  
nal=47%  
al=36%  
nal=56%  
al=66%  
al=44%  
al=36%  
nal=45%  
nal=52%  
nal=42%  
al=37%  
al=73%  
al=70%  
al=51%  
al=87%  
al=39%  
nal=84%  
nal=33%  
al=38%

nal=76%  
al=60%  
al=43%  
al=49%  
al=38%  
al=46%  
nal=44%  
al=45%  
al=44%  
nal=39%  
nal=46%  
al=35%  
al=59%  
al=39%  
al=45%  
al=53%  
al=34%  
nal=44%  
al=74%  
nal=51%  
al=53%  
nal=66%  
al=59%  
al=39%  
al=45%  
al=59%  
al=68%  
nal=54%  
al=46%  
al=31%  
nal=64%  
al=89%  
al=47%  
al=72%  
al=34%  
al=38%  
nal=66%  
al=48%  
nal=42%  
al=87%  
al=44%  
al=41%  
al=73%  
al=69%  
al=61%  
al=54%  
al=55%  
nal=48%  
nal=56%  
al=65%  
al=39%  
al=45%  
al=41%  
al=67%  
al=55%  
al=33%  
al=57%  
al=47%

al=35%  
al=62%  
nal=54%  
al=81%  
nal=50%  
nal=43%  
nal=41%  
al=39%  
al=51%  
al=81%  
al=50%  
al=41%  
nal=46%  
nal=57%  
nal=86%  
nal=42%  
nal=60%  
nal=49%  
al=42%  
al=49%  
al=30%  
al=48%  
nal=62%  
nal=42%  
nal=46%  
nal=77%  
al=45%  
al=34%  
nal=68%  
nal=65%  
al=43%  
al=46%  
al=30%  
al=50%  
nal=70%  
nal=56%  
al=43%  
nal=38%  
al=49%  
nal=75%  
al=41%  
nal=49%  
al=48%  
al=52%  
nal=57%  
al=44%  
nal=53%  
nal=49%  
nal=57%  
al=43%  
nal=55%  
nal=62%  
al=52%  
al=34%  
al=41%  
nal=80%  
nal=44%  
nal=67%

al=73%  
nal=55%  
al=33%  
nal=39%  
al=45%  
al=32%  
nal=54%  
al=51%  
nal=74%  
al=34%  
nal=69%  
nal=71%  
al=54%  
nal=55%  
al=32%  
nal=72%  
nal=42%  
al=53%  
al=34%  
al=25%  
al=41%  
al=38%  
nal=39%  
al=36%  
nal=53%  
al=66%  
nal=62%  
al=57%  
al=48%  
nal=35%  
al=42%  
nal=62%  
al=37%  
al=53%  
al=46%  
al=44%  
al=31%  
nal=59%  
al=48%  
al=48%  
al=78%  
nal=39%  
al=38%  
al=34%  
nal=42%  
al=53%  
al=50%  
nal=37%  
nal=39%  
al=43%  
nal=42%  
nal=54%  
al=35%  
nal=55%  
nal=70%  
nal=76%  
nal=46%  
al=32%

al=98%  
al=39%  
al=43%  
nal=45%  
al=41%  
nal=45%  
al=50%  
al=34%  
al=25%  
al=32%  
nal=69%  
nal=54%  
nal=33%  
nal=39%  
nal=39%  
al=38%  
nal=39%  
nal=44%  
al=30%  
al=49%  
al=40%  
nal=39%  
nal=36%  
nal=39%  
nal=32%  
al=27%  
nal=38%  
nal=34%  
nal=31%  
nal=35%  
al=31%  
nal=29%  
al=32%  
nal=63%  
nal=50%  
nal=47%  
nal=65%  
al=50%  
nal=61%  
nal=78%  
nal=33%  
al=53%  
al=48%  
nal=58%  
nal=47%  
al=54%  
al=33%  
al=37%  
al=28%  
nal=34%  
nal=34%  
al=35%  
al=29%  
nal=45%  
al=24%  
nal=49%  
al=48%  
al=33%



nal=58%  
nal=56%  
al=39%  
al=40%  
nal=51%  
al=46%  
al=47%  
al=31%  
nal=33%  
al=57%  
nal=61%  
al=51%  
nal=72%  
nal=61%  
nal=52%  
nal=52%  
al=35%  
al=42%  
al=42%  
al=43%  
al=49%  
nal=35%  
nal=46%  
al=38%  
al=43%  
al=41%  
al=47%  
al=30%  
al=40%  
al=35%  
nal=68%  
nal=30%  
nal=53%  
nal=37%  
al=55%  
al=33%  
al=37%  
al=28%  
nal=51%  
al=37%  
nal=60%  
al=47%  
nal=31%  
al=34%  
al=65%  
nal=60%  
al=34%  
al=37%  
al=33%  
nal=57%  
al=33%  
al=37%  
nal=29%  
al=46%  
al=38%  
al=53%  
nal=55%  
al=26%

nal=33%  
al=33%  
nal=59%  
nal=76%  
nal=44%  
nal=53%  
nal=49%  
nal=40%  
nal=55%  
al=47%  
al=50%  
al=37%  
nal=59%  
al=43%  
al=32%  
al=47%  
nal=50%  
nal=54%  
nal=56%  
nal=49%  
al=43%  
al=29%  
al=36%  
al=36%  
al=41%  
al=49%  
nal=61%  
nal=77%  
al=34%  
al=25%  
nal=44%  
al=40%  
nal=51%  
nal=39%  
al=41%  
al=25%  
al=37%  
al=42%  
nal=53%  
al=29%  
al=29%  
nal=67%  
nal=78%  
al=46%  
al=55%  
al=33%  
nal=53%  
nal=46%  
nal=42%  
nal=42%  
al=44%  
al=36%  
nal=67%  
nal=66%  
nal=71%  
nal=38%  
nal=42%  
nal=47%

al=37%  
nal=48%  
nal=40%  
nal=59%  
nal=80%  
al=31%  
nal=72%  
al=39%  
nal=43%  
nal=42%  
nal=44%  
al=31%  
nal=49%  
nal=58%  
nal=43%  
al=37%  
al=32%  
nal=49%  
nal=60%  
al=30%  
al=40%  
nal=43%  
nal=58%  
al=28%  
al=29%  
al=44%  
al=49%  
nal=70%  
nal=45%  
nal=61%  
al=29%  
al=20%  
nal=32%  
nal=38%  
nal=47%  
al=28%  
al=40%  
al=33%  
nal=59%  
al=33%  
al=51%  
al=43%  
nal=46%  
nal=78%  
nal=38%  
nal=47%  
nal=44%  
al=45%  
nal=30%  
al=48%  
al=41%  
nal=42%  
al=26%  
nal=47%  
nal=57%  
nal=37%  
nal=64%  
nal=34%

al=58%  
al=46%  
al=55%  
al=22%  
nal=48%  
nal=74%  
nal=32%  
nal=31%  
al=26%  
al=28%  
al=54%  
nal=36%  
al=28%  
al=46%  
nal=29%  
nal=57%  
nal=50%  
al=51%  
al=41%  
al=27%  
al=34%  
nal=60%  
al=34%  
nal=44%  
nal=43%  
nal=79%  
nal=69%  
nal=53%  
nal=45%  
al=46%  
nal=36%  
al=30%  
nal=57%  
nal=60%  
nal=45%  
nal=42%  
nal=31%  
nal=37%  
al=38%  
nal=48%  
nal=31%  
nal=40%  
nal=33%  
al=32%  
al=44%  
nal=86%  
nal=43%  
nal=47%  
nal=53%  
al=28%  
al=45%  
nal=46%  
nal=55%  
nal=50%  
al=27%  
nal=67%  
nal=51%  
al=55%

al=21%  
al=37%  
al=38%  
al=40%  
al=27%  
al=34%  
al=28%  
nal=82%  
nal=34%  
nal=37%  
al=33%  
nal=32%  
nal=93%  
al=37%  
nal=41%  
al=35%  
nal=42%  
nal=35%  
nal=44%  
al=23%  
nal=48%  
nal=41%  
nal=38%  
nal=54%  
al=37%  
nal=66%  
nal=46%  
al=41%  
al=31%  
al=32%  
al=37%  
nal=54%  
al=25%  
nal=52%  
nal=76%  
nal=32%  
al=49%  
nal=39%  
nal=32%  
nal=37%  
nal=47%  
al=34%  
al=26%  
al=44%  
nal=31%  
nal=40%  
nal=48%  
al=22%  
nal=55%  
al=37%  
nal=43%  
nal=31%  
al=30%  
nal=55%  
nal=32%  
nal=66%  
nal=48%  
nal=61%

nal=52%  
al=36%  
al=38%  
al=23%  
nal=39%  
nal=46%  
al=33%  
nal=65%  
nal=36%  
al=26%  
nal=48%  
nal=36%  
al=32%  
al=43%  
nal=37%  
nal=38%  
al=29%  
al=28%  
al=34%  
nal=83%  
nal=55%  
al=40%  
al=35%  
nal=36%  
nal=82%  
nal=35%  
nal=36%  
al=27%  
nal=45%  
nal=36%  
nal=48%  
al=22%  
al=40%  
al=32%  
nal=58%  
al=25%  
nal=36%  
nal=61%  
nal=62%  
nal=41%  
nal=58%  
nal=62%  
nal=46%  
nal=69%  
nal=45%  
al=38%  
nal=37%  
nal=45%  
al=40%  
al=29%  
nal=52%  
al=39%  
nal=28%  
al=40%  
nal=49%  
nal=38%  
nal=65%  
nal=46%

nal=51%  
al=32%  
nal=43%  
nal=54%  
nal=46%  
nal=39%  
nal=39%  
nal=39%  
al=28%  
nal=48%  
al=42%  
al=23%  
nal=50%  
al=42%  
nal=35%  
al=26%  
nal=38%  
al=32%  
al=25%  
nal=57%  
nal=51%  
nal=55%  
nal=41%  
al=24%  
al=42%  
al=33%  
al=38%  
nal=36%  
nal=43%  
nal=39%  
al=47%  
al=21%  
nal=73%  
nal=45%  
al=30%  
nal=42%  
nal=39%  
al=32%  
al=26%  
al=22%  
nal=32%  
al=26%  
nal=64%  
nal=53%  
nal=91%  
nal=24%  
al=24%  
al=23%  
nal=37%  
nal=54%  
nal=35%  
al=38%  
nal=58%  
nal=33%  
nal=44%  
nal=52%  
nal=51%  
nal=49%

al=28%  
al=28%  
al=23%  
nal=59%  
nal=71%  
al=26%  
nal=34%  
nal=61%  
al=26%  
al=25%  
al=21%  
al=29%  
nal=62%  
nal=26%  
al=25%  
al=25%  
al=27%  
nal=43%  
al=29%  
al=27%  
nal=39%  
nal=69%  
nal=52%  
al=22%  
nal=38%  
al=25%  
nal=50%  
al=29%  
nal=45%  
al=31%  
al=27%  
nal=33%  
nal=43%  
nal=36%  
nal=56%  
al=25%  
nal=35%  
al=27%  
al=27%  
al=22%  
al=37%  
nal=27%  
al=47%  
nal=31%  
al=35%  
nal=41%  
nal=56%  
al=25%  
al=33%  
nal=32%  
al=26%  
nal=39%  
nal=49%  
al=21%  
al=32%  
nal=64%  
al=26%  
nal=46%



nal=37%

al=25%

# Supplementary Table S12

## HIGH-ETV7

| NAME     | GS<br> fo GS DET    | SIZE | ES    | NES   | NOM p | FDR q-v | FWER p | RANK / LEADING | EDGE                           |
|----------|---------------------|------|-------|-------|-------|---------|--------|----------------|--------------------------------|
| KEGG_BA  | KEGG_B/ Details ... | 55   | -0.58 | -1.97 | 0.002 | 0.05303 | 0.046  | 11983          | tags=55%, list=21%, signal=69% |
| KEGG_HEI | KEGG_HI Details ... | 56   | -0.51 | -1.79 | 0.006 | 0.20421 | 0.241  | 12159          | tags=50%, list=21%, signal=63% |
| KEGG_MEI | KEGG_MI Details ... | 101  | -0.42 | -1.59 | 0.022 | 0.72224 | 0.653  | 10983          | tags=36%, list=19%, signal=44% |
| KEGG_WN  | KEGG_W Details ...  | 150  | -0.41 | -1.58 | 0.024 | 0.58769 | 0.667  | 12664          | tags=41%, list=22%, signal=53% |
| KEGG_TGF | KEGG_TC Details ... | 85   | -0.4  | -1.47 | 0.069 | 0.74151 | 0.82   | 10951          | tags=39%, list=19%, signal=48% |
| KEGG_GLY | KEGG_GI Details ... | 31   | -0.48 | -1.49 | 0.073 | 0.8036  | 0.795  | 9508           | tags=32%, list=16%, signal=39% |
| KEGG_TH  | KEGG_TH Details ... | 29   | -0.42 | -1.36 | 0.098 | 0.76568 | 0.92   | 3454           | tags=24%, list=6%, signal=26%  |
| KEGG_TAS | KEGG_TA Details ... | 51   | -0.43 | -1.38 | 0.099 | 0.79558 | 0.913  | 13846          | tags=49%, list=24%, signal=64% |
| KEGG_GLY | KEGG_GI Details ... | 43   | -0.36 | -1.33 | 0.101 | 0.69017 | 0.945  | 10468          | tags=33%, list=18%, signal=40% |
| KEGG_TER | KEGG_TE Details ... | 15   | -0.57 | -1.44 | 0.107 | 0.73815 | 0.855  | 14002          | tags=60%, list=24%, signal=79% |
| KEGG_CY  | KEGG_CY Details ... | 34   | -0.42 | -1.34 | 0.108 | 0.78905 | 0.941  | 2713           | tags=24%, list=5%, signal=25%  |
| KEGG_ADI | KEGG_AI Details ... | 68   | -0.4  | -1.38 | 0.121 | 0.85938 | 0.901  | 12976          | tags=43%, list=22%, signal=55% |
| KEGG_NEU | KEGG_NI Details ... | 271  | -0.33 | -1.26 | 0.14  | 0.66414 | 0.973  | 16803          | tags=47%, list=29%, signal=65% |
| KEGG_CAI | KEGG_CA Details ... | 177  | -0.34 | -1.27 | 0.151 | 0.75093 | 0.971  | 16796          | tags=48%, list=29%, signal=67% |
| KEGG_AX  | KEGG_AX Details ... | 128  | -0.33 | -1.27 | 0.151 | 0.67795 | 0.971  | 11441          | tags=37%, list=20%, signal=46% |
| KEGG_VA  | KEGG_V/ Details ... | 112  | -0.35 | -1.27 | 0.173 | 0.71534 | 0.971  | 10983          | tags=37%, list=19%, signal=45% |
| KEGG_ARI | KEGG_AF Details ... | 74   | -0.41 | -1.31 | 0.178 | 0.69452 | 0.956  | 5081           | tags=30%, list=9%, signal=33%  |
| KEGG_STE | KEGG_ST Details ... | 17   | -0.52 | -1.33 | 0.184 | 0.72927 | 0.943  | 3808           | tags=35%, list=7%, signal=38%  |
| KEGG_CAI | KEGG_CA Details ... | 78   | -0.36 | -1.22 | 0.193 | 0.67633 | 0.98   | 10114          | tags=35%, list=17%, signal=42% |
| KEGG_DIL | KEGG_DI Details ... | 90   | -0.38 | -1.26 | 0.216 | 0.62984 | 0.973  | 8375           | tags=34%, list=14%, signal=40% |
| KEGG_TIG | KEGG_TH Details ... | 129  | -0.3  | -1.16 | 0.216 | 0.6966  | 0.994  | 14188          | tags=36%, list=24%, signal=48% |
| KEGG_HYI | KEGG_HY Details ... | 83   | -0.38 | -1.25 | 0.221 | 0.62664 | 0.974  | 9937           | tags=37%, list=17%, signal=45% |
| KEGG_GAI | KEGG_G/ Details ... | 88   | -0.33 | -1.18 | 0.239 | 0.69933 | 0.988  | 13078          | tags=35%, list=22%, signal=45% |
| KEGG_NIT | KEGG_NI Details ... | 23   | -0.38 | -1.17 | 0.249 | 0.71056 | 0.993  | 8749           | tags=30%, list=15%, signal=36% |
| KEGG_ENI | KEGG_EN Details ... | 52   | -0.35 | -1.19 | 0.256 | 0.71435 | 0.987  | 7373           | tags=25%, list=13%, signal=29% |
| KEGG_VA  | KEGG_V/ Details ... | 44   | -0.34 | -1.15 | 0.275 | 0.70916 | 0.996  | 14782          | tags=39%, list=25%, signal=52% |
| KEGG_MEI | KEGG_MI Details ... | 71   | -0.33 | -1.13 | 0.276 | 0.72375 | 0.996  | 11361          | tags=37%, list=19%, signal=45% |
| KEGG_LO  | KEGG_LC Details ... | 68   | -0.3  | -1.11 | 0.279 | 0.71052 | 0.997  | 13078          | tags=40%, list=22%, signal=51% |
| KEGG_RN  | KEGG_RN Details ... | 29   | -0.4  | -1.13 | 0.329 | 0.70202 | 0.996  | 7398           | tags=34%, list=13%, signal=39% |
| KEGG_PRC | KEGG_PR Details ... | 89   | -0.29 | -1.08 | 0.338 | 0.69489 | 0.999  | 2978           | tags=17%, list=5%, signal=18%  |
| KEGG_EC  | KEGG_EC Details ... | 84   | -0.36 | -1.1  | 0.343 | 0.71284 | 0.997  | 5853           | tags=31%, list=10%, signal=34% |
| KEGG_VAI | KEGG_V/ Details ... | 43   | -0.35 | -1.08 | 0.349 | 0.7127  | 0.999  | 13739          | tags=40%, list=24%, signal=52% |
| KEGG_SEL | KEGG_SE Details ... | 24   | -0.38 | -1.1  | 0.356 | 0.70687 | 0.997  | 1725           | tags=17%, list=3%, signal=17%  |
| KEGG_FAI | KEGG_FA Details ... | 42   | -0.33 | -1.08 | 0.36  | 0.69075 | 1      | 9927           | tags=26%, list=17%, signal=32% |
| KEGG_RE  | KEGG_RE Details ... | 17   | -0.4  | -1.07 | 0.368 | 0.66127 | 1      | 1992           | tags=18%, list=3%, signal=18%  |
| KEGG_AL  | KEGG_AI Details ... | 19   | -0.37 | -1.07 | 0.368 | 0.6795  | 1      | 8929           | tags=32%, list=15%, signal=37% |
| KEGG_LO  | KEGG_LC Details ... | 70   | -0.29 | -1.04 | 0.381 | 0.69626 | 1      | 14094          | tags=39%, list=24%, signal=51% |
| KEGG_BU  | KEGG_BU Details ... | 34   | -0.32 | -1.04 | 0.395 | 0.70103 | 1      | 13739          | tags=35%, list=24%, signal=46% |
| KEGG_AL  | KEGG_AI Details ... | 30   | -0.32 | -1.02 | 0.41  | 0.69777 | 1      | 10761          | tags=37%, list=18%, signal=45% |
| KEGG_INS | KEGG_INSULIN_S      | 137  | -0.25 | -1.01 | 0.421 | 0.70997 | 1      | 12445          | tags=27%, list=21%, signal=34% |
| KEGG_REC | KEGG_REGULATI       | 212  | -0.27 | -1.01 | 0.422 | 0.69781 | 1      | 12596          | tags=37%, list=22%, signal=47% |
| KEGG_PRC | KEGG_PR Details ... | 32   | -0.34 | -1.02 | 0.425 | 0.70964 | 1      | 12175          | tags=28%, list=21%, signal=36% |
| KEGG_COI | KEGG_COLORECT       | 62   | -0.28 | -0.98 | 0.457 | 0.71236 | 1      | 7373           | tags=23%, list=13%, signal=26% |
| KEGG_MA  | KEGG_MATURITY       | 25   | -0.4  | -0.99 | 0.467 | 0.71104 | 1      | 20436          | tags=56%, list=35%, signal=86% |
| KEGG_PRC | KEGG_PROXIMAL       | 23   | -0.33 | -0.98 | 0.472 | 0.69988 | 1      | 10114          | tags=30%, list=17%, signal=37% |
| KEGG_N_C | KEGG_N_GLYCAN       | 46   | -0.31 | -0.96 | 0.483 | 0.70577 | 1      | 8949           | tags=26%, list=15%, signal=31% |
| KEGG_FOC | KEGG_FOCAL_AD       | 197  | -0.28 | -0.96 | 0.489 | 0.69583 | 1      | 14616          | tags=39%, list=25%, signal=51% |
| KEGG_PEN | KEGG_PENTOSE_       | 28   | -0.33 | -0.95 | 0.495 | 0.69723 | 1      | 7161           | tags=21%, list=12%, signal=24% |
| KEGG_GLY | KEGG_GLYCEROP       | 72   | -0.25 | -0.97 | 0.498 | 0.70235 | 1      | 9719           | tags=24%, list=17%, signal=28% |
| KEGG_ETF | KEGG_ETHER_LIP      | 30   | -0.28 | -0.94 | 0.506 | 0.70127 | 1      | 9494           | tags=23%, list=16%, signal=28% |
| KEGG_BIO | KEGG_BIOSYNTHI      | 20   | -0.35 | -0.94 | 0.541 | 0.68942 | 1      | 8137           | tags=25%, list=14%, signal=29% |
| KEGG_ALI | KEGG_ALDOSTER       | 42   | -0.29 | -0.94 | 0.552 | 0.68205 | 1      | 13846          | tags=38%, list=24%, signal=50% |
| KEGG_CEL | KEGG_CELL_CYC       | 124  | -0.27 | -0.85 | 0.588 | 0.78302 | 1      | 6335           | tags=21%, list=11%, signal=23% |
| KEGG_OO  | KEGG_OOCYTE_M       | 111  | -0.25 | -0.88 | 0.598 | 0.76009 | 1      | 10983          | tags=24%, list=19%, signal=30% |
| KEGG_RET | KEGG_RETINOL_N      | 64   | -0.26 | -0.88 | 0.625 | 0.7717  | 1      | 12457          | tags=30%, list=21%, signal=38% |
| KEGG_GLY | KEGG_GLYCOSAM       | 26   | -0.28 | -0.88 | 0.628 | 0.77349 | 1      | 14148          | tags=42%, list=24%, signal=56% |
| KEGG_PRI | KEGG_PRIMARY_       | 16   | -0.32 | -0.84 | 0.654 | 0.79428 | 1      | 3897           | tags=19%, list=7%, signal=20%  |

|          |                |     |       |       |       |         |   |       |                                |
|----------|----------------|-----|-------|-------|-------|---------|---|-------|--------------------------------|
| KEGG_BEI | KEGG_BETA_ALA  | 22  | -0.28 | -0.86 | 0.655 | 0.78172 | 1 | 10225 | tags=32%, list=18%, signal=39% |
| KEGG_PRC | KEGG_PROGESTE  | 85  | -0.23 | -0.82 | 0.682 | 0.80926 | 1 | 7944  | tags=21%, list=14%, signal=24% |
| KEGG_AM  | KEGG_AMINOACY  | 22  | -0.28 | -0.78 | 0.692 | 0.80953 | 1 | 15754 | tags=36%, list=27%, signal=50% |
| KEGG_VIB | KEGG_VIBRIO_CH | 53  | -0.25 | -0.83 | 0.703 | 0.78874 | 1 | 12270 | tags=26%, list=21%, signal=33% |
| KEGG_DRI | KEGG_DRUG_MEI  | 71  | -0.23 | -0.81 | 0.713 | 0.79332 | 1 | 12457 | tags=24%, list=21%, signal=30% |
| KEGG_LYS | KEGG_LYSINE_DE | 39  | -0.26 | -0.8  | 0.718 | 0.79555 | 1 | 15507 | tags=33%, list=27%, signal=45% |
| KEGG_ASC | KEGG_ASCORBAT  | 25  | -0.27 | -0.79 | 0.721 | 0.80873 | 1 | 7161  | tags=20%, list=12%, signal=23% |
| KEGG_BAS | KEGG_BASAL_TR  | 35  | -0.24 | -0.73 | 0.746 | 0.85078 | 1 | 8359  | tags=20%, list=14%, signal=23% |
| KEGG_O_C | KEGG_O_GLYCAN  | 29  | -0.26 | -0.77 | 0.778 | 0.81067 | 1 | 6278  | tags=21%, list=11%, signal=23% |
| KEGG_GLY | KEGG_GLYCOSAM  | 15  | -0.28 | -0.74 | 0.787 | 0.84923 | 1 | 6384  | tags=20%, list=11%, signal=22% |
| KEGG_OLF | KEGG_OLFACTOR  | 387 | -0.23 | -0.81 | 0.788 | 0.7986  | 1 | 25693 | tags=44%, list=44%, signal=78% |
| KEGG_ME  | KEGG_METABOLI  | 69  | -0.21 | -0.71 | 0.843 | 0.85804 | 1 | 16652 | tags=30%, list=29%, signal=43% |
| KEGG_GLY | KEGG_GLYCOSAM  | 22  | -0.23 | -0.62 | 0.871 | 0.93712 | 1 | 13687 | tags=32%, list=23%, signal=42% |
| KEGG_PPA | KEGG_PPAR_SIGN | 69  | -0.2  | -0.72 | 0.882 | 0.85736 | 1 | 16885 | tags=32%, list=29%, signal=45% |
| KEGG_TYF | KEGG_TYROSINE_ | 40  | -0.2  | -0.66 | 0.953 | 0.90538 | 1 | 21853 | tags=40%, list=37%, signal=64% |
| KEGG_STE | KEGG_STEROID_F | 55  | -0.17 | -0.59 | 0.987 | 0.94646 | 1 | 21547 | tags=40%, list=37%, signal=63% |

# LOW-ETV7

| NAME   | GS                | SIZE | ES     | NES    | NOM p  | FDR q-val | FWER p | RANK  | LEADING EDGE                   |
|--------|-------------------|------|--------|--------|--------|-----------|--------|-------|--------------------------------|
| KEGG_R | KEGG_RDetails ... | 69   | 0.7394 | 2.5376 | 0      | 0         | 0      | 5113  | tags=46%, list=9%, signal=51%  |
| KEGG_T | KEGG_TDetails ... | 102  | 0.6917 | 2.4542 | 0      | 0         | 0      | 5230  | tags=45%, list=9%, signal=49%  |
| KEGG_A | KEGG_ADetails ... | 81   | 0.8407 | 2.4412 | 0      | 0         | 0      | 1969  | tags=48%, list=3%, signal=50%  |
| KEGG_N | KEGG_NDetails ... | 132  | 0.6877 | 2.3568 | 0      | 0         | 0      | 4152  | tags=44%, list=7%, signal=47%  |
| KEGG_C | KEGG_CDetails ... | 53   | 0.6957 | 2.3341 | 0      | 0         | 0      | 4772  | tags=43%, list=8%, signal=47%  |
| KEGG_L | KEGG_LDetails ... | 70   | 0.7787 | 2.3015 | 0      | 0         | 0      | 5416  | tags=54%, list=9%, signal=60%  |
| KEGG_A | KEGG_ADetails ... | 50   | 0.8365 | 2.2788 | 0      | 0         | 0      | 1416  | tags=48%, list=2%, signal=49%  |
| KEGG_T | KEGG_TDetails ... | 41   | 0.8633 | 2.1907 | 0      | 2.04E-04  | 0.002  | 1416  | tags=61%, list=2%, signal=62%  |
| KEGG_J | KEGG_JDetails ... | 155  | 0.592  | 2.1886 | 0      | 1.81E-04  | 0.002  | 3951  | tags=35%, list=7%, signal=37%  |
| KEGG_G | KEGG_CDetails ... | 37   | 0.9237 | 2.1668 | 0      | 3.76E-04  | 0.005  | 1416  | tags=68%, list=2%, signal=69%  |
| KEGG_N | KEGG_NDetails ... | 61   | 0.6433 | 2.1321 | 0      | 6.07E-04  | 0.007  | 4938  | tags=39%, list=8%, signal=43%  |
| KEGG_I | KEGG_IDetails ... | 46   | 0.8277 | 2.131  | 0      | 5.56E-04  | 0.007  | 1479  | tags=50%, list=3%, signal=51%  |
| KEGG_P | KEGG_PDetails ... | 35   | 0.8694 | 2.1239 | 0      | 5.14E-04  | 0.007  | 2519  | tags=63%, list=4%, signal=66%  |
| KEGG_P | KEGG_PDetails ... | 45   | 0.8184 | 2.1067 | 0      | 4.77E-04  | 0.007  | 2770  | tags=47%, list=5%, signal=49%  |
| KEGG_V | KEGG_VDetails ... | 68   | 0.7075 | 2.0924 | 0      | 6.13E-04  | 0.009  | 1499  | tags=40%, list=3%, signal=41%  |
| KEGG_A | KEGG_ADetails ... | 35   | 0.9048 | 2.0896 | 0      | 5.75E-04  | 0.009  | 1416  | tags=71%, list=2%, signal=73%  |
| KEGG_C | KEGG_CDetails ... | 262  | 0.6056 | 2.078  | 0      | 6.88E-04  | 0.01   | 4938  | tags=38%, list=8%, signal=42%  |
| KEGG_A | KEGG_ADetails ... | 28   | 0.833  | 2.0584 | 0      | 8.11E-04  | 0.013  | 2354  | tags=54%, list=4%, signal=56%  |
| KEGG_A | KEGG_ADetails ... | 87   | 0.564  | 2.049  | 0      | 0.001024  | 0.016  | 7295  | tags=41%, list=12%, signal=47% |
| KEGG_S | KEGG_SDetails ... | 55   | 0.7761 | 2.0476 | 0      | 9.72E-04  | 0.016  | 4993  | tags=58%, list=9%, signal=64%  |
| KEGG_C | KEGG_CDetails ... | 128  | 0.6082 | 1.965  | 0      | 0.003656  | 0.055  | 2424  | tags=33%, list=4%, signal=34%  |
| KEGG_T | KEGG_TDetails ... | 107  | 0.5798 | 1.974  | 0.002  | 0.00337   | 0.052  | 2962  | tags=34%, list=5%, signal=35%  |
| KEGG_S | KEGG_SDetails ... | 38   | 0.5253 | 1.7411 | 0.002  | 0.037199  | 0.349  | 6323  | tags=42%, list=11%, signal=47% |
| KEGG_B | KEGG_BDetails ... | 41   | 0.4665 | 1.6264 | 0.0061 | 0.071072  | 0.561  | 4779  | tags=29%, list=8%, signal=32%  |
| KEGG_H | KEGG_FDetails ... | 85   | 0.6379 | 1.8874 | 0.0061 | 0.009901  | 0.121  | 6871  | tags=41%, list=12%, signal=47% |
| KEGG_E | KEGG_FDetails ... | 179  | 0.3949 | 1.6193 | 0.0062 | 0.070835  | 0.575  | 4152  | tags=22%, list=7%, signal=24%  |
| KEGG_A | KEGG_ADetails ... | 53   | 0.4677 | 1.6904 | 0.0062 | 0.051639  | 0.439  | 3679  | tags=28%, list=6%, signal=30%  |
| KEGG_P | KEGG_PDetails ... | 69   | 0.4749 | 1.707  | 0.008  | 0.046557  | 0.408  | 5416  | tags=32%, list=9%, signal=35%  |
| KEGG_C | KEGG_CDetails ... | 185  | 0.5026 | 1.8164 | 0.0119 | 0.019633  | 0.21   | 4110  | tags=30%, list=7%, signal=32%  |
| KEGG_A | KEGG_ADetails ... | 67   | 0.4803 | 1.7095 | 0.0127 | 0.047067  | 0.4    | 4938  | tags=25%, list=8%, signal=28%  |
| KEGG_A | KEGG_ADetails ... | 57   | 0.4664 | 1.6575 | 0.0173 | 0.06029   | 0.509  | 4779  | tags=32%, list=8%, signal=34%  |
| KEGG_R | KEGG_RDetails ... | 34   | 0.5204 | 1.6616 | 0.0179 | 0.060155  | 0.498  | 10204 | tags=38%, list=17%, signal=46% |
| KEGG_P | KEGG_PDetails ... | 66   | 0.4639 | 1.6804 | 0.0195 | 0.053874  | 0.459  | 7460  | tags=38%, list=13%, signal=43% |
| KEGG_L | KEGG_IDetails ... | 121  | 0.5155 | 1.7594 | 0.0204 | 0.033567  | 0.318  | 8480  | tags=48%, list=15%, signal=56% |
| KEGG_P | KEGG_PDetails ... | 98   | 0.4734 | 1.6441 | 0.0213 | 0.064283  | 0.534  | 9339  | tags=48%, list=16%, signal=57% |
| KEGG_F | KEGG_FDetails ... | 79   | 0.4188 | 1.5818 | 0.0267 | 0.086035  | 0.629  | 3679  | tags=27%, list=6%, signal=28%  |
| KEGG_N | KEGG_NDetails ... | 24   | 0.4585 | 1.4983 | 0.0368 | 0.132922  | 0.756  | 13070 | tags=54%, list=22%, signal=70% |
| KEGG_B | KEGG_BDetails ... | 75   | 0.5096 | 1.6259 | 0.0435 | 0.069279  | 0.561  | 5312  | tags=31%, list=9%, signal=34%  |
| KEGG_N | KEGG_NDetails ... | 44   | 0.5645 | 1.6102 | 0.0438 | 0.073587  | 0.588  | 9018  | tags=45%, list=15%, signal=54% |
| KEGG_D | KEGG_DRUG_ME      | 51   | 0.41   | 1.4066 | 0.0631 | 0.205037  | 0.879  | 10228 | tags=39%, list=18%, signal=48% |
| KEGG_E | KEGG_EPITHELIA    | 68   | 0.3931 | 1.4265 | 0.0707 | 0.189534  | 0.857  | 7659  | tags=34%, list=13%, signal=39% |
| KEGG_A | KEGG_ABC_TRAN     | 44   | 0.4087 | 1.3775 | 0.071  | 0.211885  | 0.905  | 2599  | tags=14%, list=4%, signal=14%  |
| KEGG_F | KEGG_FC_GAMM      | 93   | 0.3907 | 1.452  | 0.0782 | 0.168368  | 0.828  | 5312  | tags=32%, list=9%, signal=35%  |
| KEGG_P | KEGG_PANTOTHE     | 16   | 0.4875 | 1.3982 | 0.0811 | 0.204622  | 0.887  | 5260  | tags=44%, list=9%, signal=48%  |
| KEGG_D | KEGG_IDetails ... | 36   | 0.647  | 1.5374 | 0.0853 | 0.108318  | 0.695  | 9659  | tags=64%, list=17%, signal=77% |
| KEGG_G | KEGG_GALACTOS     | 26   | 0.442  | 1.3508 | 0.099  | 0.230996  | 0.928  | 7247  | tags=38%, list=12%, signal=44% |
| KEGG_A | KEGG_ALZHEIME     | 152  | 0.3581 | 1.3977 | 0.1066 | 0.200529  | 0.887  | 6375  | tags=32%, list=11%, signal=36% |
| KEGG_C | KEGG_COMPLEM      | 69   | 0.4625 | 1.399  | 0.1377 | 0.208358  | 0.886  | 7209  | tags=36%, list=12%, signal=41% |
| KEGG_S | KEGG_SMALL_CE     | 84   | 0.3825 | 1.3679 | 0.1389 | 0.217411  | 0.917  | 4893  | tags=25%, list=8%, signal=27%  |
| KEGG_B | KEGG_BASE_EXC     | 34   | 0.4945 | 1.3973 | 0.14   | 0.19669   | 0.889  | 8950  | tags=53%, list=15%, signal=62% |
| KEGG_V | KEGG_VEGF_SIG     | 76   | 0.3093 | 1.2198 | 0.1772 | 0.339008  | 0.982  | 3740  | tags=22%, list=6%, signal=24%  |
| KEGG_N | KEGG_NON_SMAI     | 54   | 0.3484 | 1.2151 | 0.188  | 0.333643  | 0.983  | 5194  | tags=24%, list=9%, signal=26%  |
| KEGG_N | KEGG_NEUROTRC     | 125  | 0.323  | 1.2325 | 0.1952 | 0.353451  | 0.978  | 3679  | tags=18%, list=6%, signal=20%  |
| KEGG_P | KEGG_PEROXISO     | 78   | 0.352  | 1.2296 | 0.2065 | 0.35091   | 0.98   | 7807  | tags=31%, list=13%, signal=35% |
| KEGG_C | KEGG_CHRONIC_     | 73   | 0.3363 | 1.2255 | 0.2102 | 0.343847  | 0.98   | 5416  | tags=26%, list=9%, signal=29%  |
| KEGG_O | KEGG_OTHER_GL     | 16   | 0.4972 | 1.2602 | 0.2162 | 0.329655  | 0.974  | 8380  | tags=50%, list=14%, signal=58% |
| KEGG_A | KEGG_ARGININE_    | 53   | 0.3261 | 1.1719 | 0.2237 | 0.356609  | 0.992  | 3608  | tags=19%, list=6%, signal=20%  |

|         |                |     |        |        |        |          |       |       |                                |
|---------|----------------|-----|--------|--------|--------|----------|-------|-------|--------------------------------|
| KEGG_A  | KEGG_AMINO_SU  | 43  | 0.3811 | 1.2222 | 0.2283 | 0.34227  | 0.981 | 3815  | tags=28%, list=7%, signal=30%  |
| KEGG_G  | KEGG_GLYCOSAM  | 21  | 0.4386 | 1.2359 | 0.2305 | 0.35566  | 0.978 | 2583  | tags=33%, list=4%, signal=35%  |
| KEGG_G  | KEGG_GLYCATHI  | 49  | 0.348  | 1.2022 | 0.2341 | 0.345267 | 0.986 | 6970  | tags=29%, list=12%, signal=32% |
| KEGG_G  | KEGG_GLYCOPH   | 26  | 0.3747 | 1.1878 | 0.2377 | 0.353601 | 0.989 | 4615  | tags=19%, list=8%, signal=21%  |
| KEGG_H  | KEGG_HUNTINGT  | 167 | 0.3224 | 1.2172 | 0.2379 | 0.336581 | 0.983 | 5427  | tags=27%, list=9%, signal=30%  |
| KEGG_LI | KEGG_LEUKOCY1  | 115 | 0.3317 | 1.1774 | 0.2451 | 0.355289 | 0.992 | 8107  | tags=35%, list=14%, signal=40% |
| KEGG_M  | KEGG_MISMATCH  | 23  | 0.5333 | 1.2709 | 0.251  | 0.321072 | 0.97  | 9018  | tags=43%, list=15%, signal=51% |
| KEGG_P  | KEGG_PARKINSO  | 113 | 0.3731 | 1.2295 | 0.2531 | 0.344741 | 0.98  | 5427  | tags=28%, list=9%, signal=31%  |
| KEGG_G  | KEGG_GLYCOPH   | 15  | 0.455  | 1.1988 | 0.2551 | 0.344585 | 0.986 | 4888  | tags=27%, list=8%, signal=29%  |
| KEGG_D  | KEGG_DORSO_VE  | 24  | 0.3976 | 1.1779 | 0.2651 | 0.360145 | 0.992 | 2282  | tags=8%, list=4%, signal=9%    |
| KEGG_A  | KEGG_ARACHIDC  | 58  | 0.3075 | 1.1246 | 0.2725 | 0.399014 | 0.995 | 8244  | tags=31%, list=14%, signal=36% |
| KEGG_TI | KEGG_TRYPTOPH  | 39  | 0.3418 | 1.1246 | 0.2806 | 0.404691 | 0.995 | 6419  | tags=23%, list=11%, signal=26% |
| KEGG_N  | KEGG_NOTCH_SIC | 47  | 0.3125 | 1.1051 | 0.2916 | 0.420731 | 0.996 | 5143  | tags=23%, list=9%, signal=26%  |
| KEGG_U  | KEGG_UBIQUITIN | 130 | 0.3133 | 1.1277 | 0.3057 | 0.406363 | 0.995 | 6666  | tags=20%, list=11%, signal=23% |
| KEGG_O  | KEGG_OXIDATIVI | 115 | 0.3576 | 1.1444 | 0.3144 | 0.389029 | 0.994 | 9341  | tags=43%, list=16%, signal=51% |
| KEGG_M  | KEGG_MTOR_SIG  | 51  | 0.3071 | 1.0992 | 0.3156 | 0.423348 | 0.996 | 5619  | tags=24%, list=10%, signal=26% |
| KEGG_P  | KEGG_PATHWAY   | 322 | 0.2668 | 1.0943 | 0.3288 | 0.424847 | 0.996 | 6436  | tags=21%, list=11%, signal=23% |
| KEGG_FI | KEGG_FRUCTOSE  | 33  | 0.3345 | 1.0773 | 0.334  | 0.431541 | 0.998 | 5318  | tags=24%, list=9%, signal=27%  |
| KEGG_G  | KEGG_GLYCOLYS  | 62  | 0.3122 | 1.0749 | 0.3373 | 0.429558 | 0.998 | 4426  | tags=19%, list=8%, signal=21%  |
| KEGG_M  | KEGG_MAPK_SIG  | 266 | 0.2571 | 1.0556 | 0.3387 | 0.451136 | 0.999 | 6872  | tags=22%, list=12%, signal=25% |
| KEGG_PI | KEGG_PRION_DIS | 35  | 0.3444 | 1.0835 | 0.3707 | 0.428877 | 0.997 | 7814  | tags=29%, list=13%, signal=33% |
| KEGG_PI | KEGG_PHENYLAL  | 17  | 0.3655 | 1.054  | 0.3768 | 0.447627 | 0.999 | 181   | tags=6%, list=0%, signal=6%    |
| KEGG_PI | KEGG_PHOSPHAT  | 76  | 0.2861 | 1.033  | 0.3829 | 0.466592 | 0.999 | 5659  | tags=20%, list=10%, signal=22% |
| KEGG_O  | KEGG_ONE_CARE  | 17  | 0.4098 | 1.0836 | 0.3919 | 0.434583 | 0.997 | 9467  | tags=41%, list=16%, signal=49% |
| KEGG_RI | KEGG_RENAL_CE  | 66  | 0.3001 | 1.0382 | 0.4044 | 0.464795 | 0.999 | 5822  | tags=24%, list=10%, signal=27% |
| KEGG_PI | KEGG_PURINE_M  | 154 | 0.2544 | 0.9892 | 0.4561 | 0.527215 | 0.999 | 8661  | tags=32%, list=15%, signal=37% |
| KEGG_G  | KEGG_GLYOXYL   | 16  | 0.3689 | 0.9764 | 0.4646 | 0.528011 | 0.999 | 12323 | tags=50%, list=21%, signal=63% |
| KEGG_SI | KEGG_SPLICEOSC | 126 | 0.3223 | 0.9783 | 0.4656 | 0.531249 | 0.999 | 11437 | tags=33%, list=20%, signal=40% |
| KEGG_EI | KEGG_ERBB_SIG  | 86  | 0.2645 | 0.9879 | 0.4672 | 0.52283  | 0.999 | 5194  | tags=19%, list=9%, signal=20%  |
| KEGG_G  | KEGG_GNRH_SIG  | 101 | 0.2425 | 0.9733 | 0.4835 | 0.526375 | 0.999 | 8278  | tags=25%, list=14%, signal=29% |
| KEGG_P  | KEGG_PATHOGEN  | 56  | 0.2785 | 0.9432 | 0.5108 | 0.550449 | 0.999 | 5537  | tags=27%, list=9%, signal=30%  |
| KEGG_T  | KEGG_TYPE_II_D | 47  | 0.2758 | 0.948  | 0.5245 | 0.555092 | 0.999 | 5619  | tags=21%, list=10%, signal=24% |
| KEGG_G  | KEGG_GLIOMA    | 65  | 0.265  | 0.947  | 0.534  | 0.550309 | 0.999 | 5346  | tags=18%, list=9%, signal=20%  |
| KEGG_P  | KEGG_PORPHYRI  | 40  | 0.2837 | 0.9299 | 0.5405 | 0.564787 | 0.999 | 4216  | tags=18%, list=7%, signal=19%  |
| KEGG_R  | KEGG_RIBOSOME  | 88  | 0.4374 | 0.9531 | 0.5775 | 0.552912 | 0.999 | 11521 | tags=45%, list=20%, signal=57% |
| KEGG_PI | KEGG_PROTEIN_F | 23  | 0.312  | 0.8814 | 0.5849 | 0.626644 | 1     | 10237 | tags=35%, list=18%, signal=42% |
| KEGG_SI | KEGG_SPHINGOL  | 36  | 0.2718 | 0.8874 | 0.5965 | 0.624103 | 1     | 4766  | tags=25%, list=8%, signal=27%  |
| KEGG_PI | KEGG_PENTOSE_  | 27  | 0.2855 | 0.8512 | 0.649  | 0.670163 | 1     | 3816  | tags=19%, list=7%, signal=20%  |
| KEGG_P  | KEGG_PYRUVATE  | 40  | 0.2721 | 0.8461 | 0.6586 | 0.671998 | 1     | 11307 | tags=38%, list=19%, signal=46% |
| KEGG_S  | KEGG_STARCH_A  | 52  | 0.2446 | 0.8449 | 0.6816 | 0.666834 | 1     | 10144 | tags=33%, list=17%, signal=40% |
| KEGG_H  | KEGG_HOMOLOG   | 26  | 0.2894 | 0.753  | 0.6929 | 0.790617 | 1     | 6781  | tags=27%, list=12%, signal=30% |
| KEGG_LI | KEGG_LINOLEIC_ | 29  | 0.2666 | 0.8197 | 0.7064 | 0.699062 | 1     | 8059  | tags=31%, list=14%, signal=36% |
| KEGG_IN | KEGG_INOSITOL_ | 54  | 0.2301 | 0.7987 | 0.7079 | 0.726346 | 1     | 3391  | tags=13%, list=6%, signal=14%  |
| KEGG_R  | KEGG_RNA_DEGF  | 56  | 0.2251 | 0.7143 | 0.7945 | 0.839877 | 1     | 4005  | tags=14%, list=7%, signal=15%  |
| KEGG_C  | KEGG_CITRATE_C | 31  | 0.2432 | 0.645  | 0.8168 | 0.897515 | 1     | 11160 | tags=35%, list=19%, signal=44% |
| KEGG_G  | KEGG_GLYCOSYI  | 25  | 0.2278 | 0.6621 | 0.8819 | 0.888242 | 1     | 11700 | tags=40%, list=20%, signal=50% |
| KEGG_H  | KEGG_HISTIDINE | 28  | 0.2106 | 0.6727 | 0.899  | 0.884859 | 1     | 3608  | tags=11%, list=6%, signal=11%  |

# Supplementary Table S13

| id                           | StromalScore | ImmuneScore  | ESTIMATEScore |
|------------------------------|--------------|--------------|---------------|
| TCGA-ZF-AA51-01A-21R-A39I-07 | 32.78758553  | 1444.819214  | 1477.6068     |
| TCGA-BT-A42C-01A-11R-A23N-07 | -1816.216696 | -483.7612023 | -2299.977898  |
| TCGA-G2-A3IB-01A-11R-A20F-07 | -1518.143937 | -225.0357511 | -1743.179688  |
| TCGA-2F-A9KW-01A-11R-A38B-07 | -48.54229396 | 356.7002633  | 308.1579693   |
| TCGA-XF-AAME-01A-12R-A42T-07 | 1578.90321   | 2416.129621  | 3995.032831   |
| TCGA-XF-AAN0-01A-11R-A42T-07 | -478.6836735 | 905.2061996  | 426.5225261   |
| TCGA-CF-A47W-01A-11R-A23W-07 | -1716.804659 | -427.4608438 | -2144.265503  |
| TCGA-DK-A1A7-01A-11R-A13Y-07 | -1140.910945 | 14.5936377   | -1126.317308  |
| TCGA-PQ-A6FN-01A-11R-A31N-07 | -581.3200502 | 695.3542011  | 114.0341509   |
| TCGA-XF-AAMY-01A-11R-A42T-07 | 160.4655591  | 170.5982823  | 331.0638414   |
| TCGA-G2-AA3F-01A-12R-A42T-07 | -1186.437579 | -504.1818732 | -1690.619452  |
| TCGA-FJ-A871-01A-11R-A352-07 | -855.7657065 | -553.759908  | -1409.525614  |
| TCGA-GC-A3RB-01A-12R-A220-07 | -1391.079424 | -236.0362272 | -1627.115651  |
| TCGA-UY-A9PF-01A-11R-A38B-07 | -492.9209929 | 439.8202686  | -53.1007243   |
| TCGA-YC-A89H-01A-11R-A36F-07 | -696.6120188 | 326.9249216  | -369.6870972  |
| TCGA-DK-A6AW-01A-11R-A30C-07 | -1173.620338 | -350.3122251 | -1523.932563  |
| TCGA-FD-A43N-01A-11R-A23W-07 | -70.3616635  | 321.5900412  | 251.2283777   |
| TCGA-UY-A8OD-01A-11R-A36F-07 | 535.1499961  | 957.2512666  | 1492.401263   |
| TCGA-2F-A9KT-01A-11R-A38B-07 | -992.4049851 | -140.5560666 | -1132.961052  |
| TCGA-CU-A0YR-01A-12R-A10U-07 | 100.2806991  | 1292.605424  | 1392.886123   |
| TCGA-4Z-AA84-01A-11R-A39I-07 | -1061.160717 | -394.0577722 | -1455.218489  |
| TCGA-CF-A27C-01A-11R-A16R-07 | -2243.149142 | -473.6248049 | -2716.773947  |
| TCGA-ZF-AA5N-01A-11R-A42T-07 | -1576.902874 | -206.0772239 | -1782.980098  |
| TCGA-DK-AA6U-01A-11R-A39I-07 | -1946.190087 | -454.0905119 | -2400.280599  |
| TCGA-GD-A3OS-01A-12R-A220-07 | -388.7079012 | -97.09982404 | -485.8077253  |
| TCGA-4Z-AA82-01A-11R-A39I-07 | -209.9392227 | 316.0597709  | 106.1205482   |
| TCGA-DK-AA76-01A-11R-A39I-07 | -1893.2902   | -1172.424071 | -3065.714271  |
| TCGA-DK-A3IL-01A-11R-A20F-07 | -818.9546252 | -309.9665023 | -1128.921127  |
| TCGA-ZF-A9R1-01A-11R-A39I-07 | -1266.521024 | -193.0916174 | -1459.612642  |
| TCGA-XF-A9SH-01A-11R-A39I-07 | -938.7449668 | 94.17531933  | -844.5696475  |
| TCGA-C4-A0F7-01A-11R-A084-07 | -1010.934687 | -503.9408277 | -1514.875514  |
| TCGA-C4-A0F0-01A-12R-A10U-07 | -226.5068584 | 824.9287192  | 598.4218607   |
| TCGA-DK-A3WX-01A-22R-A22U-07 | 83.46013378  | 1462.896289  | 1546.356422   |
| TCGA-BT-A2LA-01A-11R-A18C-07 | -1464.130769 | -1513.818931 | -2977.9497    |
| TCGA-4Z-AA87-01A-11R-A39I-07 | -872.3538145 | 670.1355676  | -202.2182469  |
| TCGA-BT-A2LB-01A-11R-A18C-07 | 204.2524299  | 1000.185237  | 1204.437667   |
| TCGA-DK-A2I6-01A-12R-A18C-07 | -1006.766968 | -242.5377144 | -1249.304683  |
| TCGA-BT-A20W-01A-21R-A14Y-07 | -653.8803137 | 576.592141   | -77.28817278  |
| TCGA-FD-A5BX-01A-11R-A26T-07 | 775.9310027  | 1853.73093   | 2629.661933   |
| TCGA-FJ-A3Z7-01A-12R-A23N-07 | 110.5601186  | 322.5521122  | 433.1122307   |
| TCGA-E7-A7PW-01A-11R-A352-07 | -1959.356768 | -179.0879645 | -2138.444732  |
| TCGA-4Z-AA7S-01A-11R-A39I-07 | -1447.857701 | -662.0392345 | -2109.896935  |
| TCGA-CF-A3MH-01A-11R-A20F-07 | -2027.983214 | -153.7949789 | -2181.778193  |
| TCGA-FD-A6TG-01A-11R-A32O-07 | 540.0878306  | 831.4355355  | 1371.523366   |
| TCGA-DK-A6AV-01A-12R-A30C-07 | -1054.822791 | 291.8651778  | -762.9576129  |
| TCGA-DK-A1A3-01A-11R-A13Y-07 | 198.295734   | 647.8116132  | 846.1073472   |
| TCGA-GC-A3RD-01A-12R-A22U-07 | -1229.620182 | -152.1366199 | -1381.756801  |
| TCGA-BT-A20R-01A-12R-A16R-07 | 853.666859   | 565.4212595  | 1419.088119   |
| TCGA-XF-A9T0-01A-11R-A39I-07 | -256.927916  | 613.0123839  | 356.0844679   |
| TCGA-YF-AA3M-01A-11R-A42T-07 | -1580.181137 | -145.5690255 | -1725.750163  |
| TCGA-FD-A62O-01A-11R-A30C-07 | -911.152237  | -472.2078529 | -1383.36009   |
| TCGA-BL-A3JM-01A-12R-A21D-07 | -596.2249657 | -225.9493769 | -822.1743426  |
| TCGA-FJ-A3ZF-01A-11R-A23N-07 | -1923.981545 | -1086.243591 | -3010.225135  |
| TCGA-K4-AAQO-01A-11R-A38B-07 | 438.9785152  | 820.0172589  | 1258.995774   |
| TCGA-XF-AAMJ-01A-11R-A42T-07 | 1228.824521  | 590.482679   | 1819.3072     |
| TCGA-G2-A2EC-01A-11R-A180-07 | 361.7462563  | 953.5753123  | 1315.321569   |
| TCGA-CU-A0YN-01A-21R-A10U-07 | -126.2738067 | 912.9617221  | 786.6879155   |

|                              |              |              |              |
|------------------------------|--------------|--------------|--------------|
| TCGA-FD-A5BZ-01A-11R-A28M-07 | 1044.086987  | 114.9040768  | 1158.991064  |
| TCGA-UY-A9PE-01A-11R-A38B-07 | -570.4405076 | -302.1433496 | -872.5838573 |
| TCGA-BT-A2LD-01A-12R-A20F-07 | -666.3928008 | 182.4357063  | -483.9570945 |
| TCGA-UY-A9PD-01A-11R-A38B-07 | -302.7679125 | -89.78217376 | -392.5500863 |
| TCGA-CU-A5W6-01A-11R-A28M-07 | -1014.502831 | 131.0137774  | -883.4890535 |
| TCGA-CF-A3MF-01A-12R-A21D-07 | -1360.903018 | -318.9058452 | -1679.808863 |
| TCGA-CF-A47T-01A-11R-A23W-07 | -1362.24037  | -583.3195482 | -1945.559918 |
| TCGA-YC-A8S6-01A-31R-A38B-07 | 601.02009    | 1310.698215  | 1911.718305  |
| TCGA-DK-AA6T-01A-11R-A39I-07 | -167.0789988 | 2176.911384  | 2009.832385  |
| TCGA-BT-A20N-01A-11R-A14Y-07 | -1085.321534 | -733.3445574 | -1818.666091 |
| TCGA-C4-A0F6-01A-11R-A10U-07 | -405.7798152 | 69.03659456  | -336.7432207 |
| TCGA-FD-A3B6-01A-21R-A20F-07 | -238.7557348 | 1723.945563  | 1485.189829  |
| TCGA-XF-A9T2-01A-11R-A42T-07 | -192.3304104 | -125.504888  | -317.8352984 |
| TCGA-GC-A3OO-01A-11R-A22U-07 | -50.91724238 | 384.1812845  | 333.2640421  |
| TCGA-FD-A3SN-01A-12R-A22U-07 | -332.1015498 | 277.9910893  | -54.11046043 |
| TCGA-ZF-A9R2-01A-11R-A39I-07 | -2523.807661 | -812.8730472 | -3336.680708 |
| TCGA-E7-A4IJ-01A-31R-A26T-07 | -1415.960934 | 502.3874337  | -913.5735004 |
| TCGA-H4-A2HO-01A-11R-A180-07 | -854.6917222 | 517.1168972  | -337.574825  |
| TCGA-XF-AAN3-01A-11R-A42T-07 | 253.5486609  | 731.8099038  | 985.3585646  |
| TCGA-XF-AAMH-01A-11R-A42T-07 | -941.0822289 | -654.4744663 | -1595.556695 |
| TCGA-XF-A9ST-01A-11R-A42T-07 | -1532.276709 | -943.9025576 | -2476.179267 |
| TCGA-GU-A42R-01A-11R-A23N-07 | -1671.688448 | -712.150787  | -2383.839235 |
| TCGA-R3-A69X-01A-22R-A30C-07 | 475.0582581  | 1277.384239  | 1752.442497  |
| TCGA-FD-A6TF-01A-52R-A32O-07 | 445.7657454  | 405.8761549  | 851.6419003  |
| TCGA-XF-AAMR-01A-31R-A42T-07 | 568.425506   | 559.6323707  | 1128.057877  |
| TCGA-DK-A3IQ-01A-31R-A32Y-07 | 1788.15184   | 359.371394   | 2147.523234  |
| TCGA-E7-A4XJ-01A-11R-A26T-07 | -1435.63348  | -529.1924223 | -1964.825902 |
| TCGA-4Z-AA7M-01A-11R-A39I-07 | -1117.078008 | -201.8104095 | -1318.888418 |
| TCGA-ZF-AA56-01A-31R-A39I-07 | -214.6232854 | 1024.735281  | 810.1119953  |
| TCGA-XF-A8HH-01A-11R-A38B-07 | 208.4458413  | 274.5703945  | 483.0162358  |
| TCGA-C4-A0EZ-01A-21R-A24X-07 | -1369.738353 | -1194.460849 | -2564.199202 |
| TCGA-FD-A62P-01A-32R-A30C-07 | 128.5319136  | 1162.745729  | 1291.277643  |
| TCGA-GU-A42Q-01A-11R-A23W-07 | -1500.810052 | -551.5190562 | -2052.329108 |
| TCGA-GD-A3OQ-01A-32R-A220-07 | -1232.185027 | -127.7196991 | -1359.904726 |
| TCGA-BT-A20U-01A-11R-A14Y-07 | -382.5827482 | 199.1047669  | -183.4779812 |
| TCGA-XF-A9SW-01A-11R-A42T-07 | 1487.841307  | 1133.862423  | 2621.70373   |
| TCGA-ZF-A9RC-01A-11R-A38B-07 | -9.625174738 | -284.4898875 | -294.1150622 |
| TCGA-E7-A6MD-01A-41R-A352-07 | 29.90544266  | 1081.904457  | 1111.809899  |
| TCGA-E5-A4TZ-01A-11R-A31N-07 | -2067.906824 | -317.3408843 | -2385.247709 |
| TCGA-BT-A0YX-01A-11R-A10U-07 | -579.917691  | 955.6813362  | 375.7636453  |
| TCGA-FT-A3EE-01A-11R-A206-07 | -1111.13526  | -284.8973122 | -1396.032573 |
| TCGA-ZF-A9RL-01A-11R-A38B-07 | -2280.334192 | -960.0256762 | -3240.359869 |
| TCGA-ZF-A9R9-01A-11R-A38B-07 | 752.5509131  | 519.0648935  | 1271.615807  |
| TCGA-ZF-A9RE-01A-11R-A38B-07 | -2084.600796 | -382.3380309 | -2466.938827 |
| TCGA-CF-A5U8-01A-11R-A28M-07 | -1834.582029 | -519.9362869 | -2354.518316 |
| TCGA-XF-AAMW-01A-11R-A42T-07 | -479.1744084 | 808.3740612  | 329.1996528  |
| TCGA-GU-A767-01A-11R-A32O-07 | -411.9720135 | -151.5376607 | -563.5096742 |
| TCGA-SY-A9G0-01A-12R-A38B-07 | 1125.940816  | 675.7224522  | 1801.663269  |
| TCGA-GV-A40G-01A-11R-A23N-07 | -1904.050598 | -719.6521703 | -2623.702768 |
| TCGA-ZF-AA4R-01A-11R-A38B-07 | 142.3784664  | -166.9331611 | -24.55469468 |
| TCGA-K4-A3WV-01A-11R-A22U-07 | -1432.971567 | -898.8744651 | -2331.846033 |
| TCGA-G2-A3VY-01A-11R-A22U-07 | -2141.305525 | -1052.268306 | -3193.573831 |
| TCGA-XF-AAN8-01A-11R-A42T-07 | 2173.232609  | 2220.757388  | 4393.989998  |
| TCGA-K4-A3WU-01B-11R-A23N-07 | 159.6359884  | 1563.817383  | 1723.453372  |
| TCGA-FD-A3SJ-01A-12R-A22U-07 | -241.1800793 | -37.37734681 | -278.5574261 |
| TCGA-FD-A3B5-01A-11R-A20F-07 | -827.669585  | -300.3755513 | -1128.045136 |
| TCGA-4Z-AA80-01A-11R-A39I-07 | -1797.747274 | -519.8471313 | -2317.594405 |
| TCGA-G2-A3IE-01A-11R-A20F-07 | -1417.870033 | -173.5491115 | -1591.419145 |

|                              |              |              |              |
|------------------------------|--------------|--------------|--------------|
| TCGA-XF-A8HG-01A-11R-A36F-07 | -1718.539812 | -537.1999557 | -2255.739767 |
| TCGA-K4-A83P-01A-11R-A352-07 | 1135.523307  | 2564.842421  | 3700.365728  |
| TCGA-GD-A2C5-01A-12R-A180-07 | -231.137795  | 1.799243369  | -229.3385517 |
| TCGA-XF-AAMX-01A-11R-A42T-07 | -424.7911888 | -297.7370873 | -722.5282762 |
| TCGA-DK-A1AE-01A-11R-A13Y-07 | -1303.741983 | -411.3217483 | -1715.063731 |
| TCGA-FJ-A3ZE-01A-11R-A23N-07 | -2127.572862 | -1083.612839 | -3211.185701 |
| TCGA-DK-A2I1-01A-11R-A180-07 | 797.1507132  | 1228.090061  | 2025.240774  |
| TCGA-FD-A5BR-01A-11R-A26T-07 | -182.6517508 | 1038.227009  | 855.575258   |
| TCGA-DK-A1AF-01A-11R-A13Y-07 | 1249.508009  | 1761.440866  | 3010.948874  |
| TCGA-LT-A5Z6-01A-11R-A28M-07 | -1882.686355 | 29.5367305   | -1853.149624 |
| TCGA-K4-A4AB-01B-12R-A28M-07 | 142.4038111  | 527.8312289  | 670.23504    |
| TCGA-G2-A2EO-01A-11R-A180-07 | 453.7178217  | 1415.61875   | 1869.336572  |
| TCGA-GV-A3JZ-01A-11R-A21D-07 | -403.8390167 | 78.82385838  | -325.0151583 |
| TCGA-XF-A9SV-01A-21R-A42T-07 | 143.7136967  | -104.6311617 | 39.08253496  |
| TCGA-FD-A6TH-01A-11R-A32O-07 | -6.917396765 | 118.6160187  | 111.6986219  |
| TCGA-DK-AA6W-01A-12R-A39I-07 | -1255.623448 | -112.2454485 | -1367.868896 |
| TCGA-DK-A3X1-01A-12R-A22U-07 | -574.1578472 | 74.44436244  | -499.7134848 |
| TCGA-XF-AAMG-01A-11R-A42T-07 | -197.7613322 | -66.20829109 | -263.9696233 |
| TCGA-UY-A78N-01A-12R-A33J-07 | -1236.422921 | -942.8949187 | -2179.31784  |
| TCGA-DK-AA75-01A-11R-A39I-07 | -1972.59542  | -796.1124949 | -2768.707915 |
| TCGA-ZF-AA5P-01A-11R-A39I-07 | 729.3630128  | 922.5889047  | 1651.951917  |
| TCGA-FD-A3SL-01A-21R-A22U-07 | 1147.831214  | 726.9441881  | 1874.775402  |
| TCGA-XF-AAN7-01A-11R-A42T-07 | -171.193373  | 10.51867845  | -160.6746946 |
| TCGA-DK-A3IM-01A-11R-A20F-07 | -1830.555732 | -695.9575307 | -2526.513262 |
| TCGA-FD-A3SS-01A-12R-A22U-07 | -1028.806074 | -464.6981206 | -1493.504195 |
| TCGA-4Z-AA7N-01A-11R-A39I-07 | 827.6745637  | 2635.708844  | 3463.383407  |
| TCGA-HQ-A2OE-01A-11R-A206-07 | -1835.818542 | -440.5767062 | -2276.395248 |
| TCGA-UY-A8OC-01A-11R-A36F-07 | 343.0170832  | 302.6127004  | 645.6297836  |
| TCGA-GV-A3JV-01A-11R-A220-07 | -217.5467589 | 602.62852    | 385.0817611  |
| TCGA-KQ-A41S-01A-12R-A33J-07 | 333.8836771  | 262.8166139  | 596.700291   |
| TCGA-DK-A2HX-01A-12R-A18C-07 | 991.3564904  | 253.722966   | 1245.079456  |
| TCGA-CF-A8HY-01A-11R-A36F-07 | -1698.927477 | -142.2891317 | -1841.216609 |
| TCGA-BT-A0S7-01A-11R-A10U-07 | -526.6595009 | -122.6401389 | -649.2996398 |
| TCGA-GU-A42P-01A-11R-A23W-07 | -1997.738307 | -1036.828308 | -3034.566615 |
| TCGA-FD-A3NA-01A-11R-A21D-07 | -371.7782667 | 672.1949436  | 300.4166769  |
| TCGA-XF-A9SL-01A-11R-A39I-07 | 1104.762651  | 2056.881516  | 3161.644167  |
| TCGA-ZF-AA54-01A-11R-A39I-07 | 852.3590577  | 1768.691196  | 2621.050254  |
| TCGA-ZF-AA4N-01A-11R-A38B-07 | -825.1804995 | 777.6069411  | -47.57355842 |
| TCGA-BT-A20X-01A-11R-A16R-07 | -263.7677593 | 419.6619824  | 155.8942231  |
| TCGA-GV-A3JW-01A-11R-A20F-07 | -1625.82104  | -1052.891038 | -2678.712078 |
| TCGA-FD-A6TI-01A-11R-A32O-07 | -757.3087017 | -73.43860388 | -830.7473056 |
| TCGA-FD-A3SP-01A-31R-A22U-07 | 1721.496654  | 1948.137055  | 3669.633709  |
| TCGA-E7-A97Q-01A-11R-A38B-07 | -191.4426117 | 267.3977259  | 75.95511422  |
| TCGA-GV-A3QG-01A-11R-A220-07 | 1355.165006  | 2745.437968  | 4100.602975  |
| TCGA-ZF-AA52-01A-12R-A39I-07 | 824.4039566  | 1057.351027  | 1881.754984  |
| TCGA-CF-A9FL-01A-11R-A38B-07 | -406.2534876 | -26.95832667 | -433.2118142 |
| TCGA-G2-AA3D-01A-11R-A39I-07 | -2172.978646 | -396.9958516 | -2569.974497 |
| TCGA-DK-A2I2-01A-11R-A180-07 | 224.6640859  | 1605.855233  | 1830.519319  |
| TCGA-FD-A62S-01A-11R-A30C-07 | 1251.034062  | 1439.004175  | 2690.038238  |
| TCGA-MV-A51V-01A-11R-A26T-07 | -1296.676001 | -614.729522  | -1911.405523 |
| TCGA-DK-A3X2-01A-11R-A22U-07 | -1883.308754 | -1012.314809 | -2895.623562 |
| TCGA-DK-A1AD-01A-11R-A13Y-07 | -377.5006652 | 270.698277   | -106.8023881 |
| TCGA-K4-A5RI-01A-11R-A28M-07 | -624.4263477 | 218.7532106  | -405.6731372 |
| TCGA-GV-A3QF-01A-31R-A22U-07 | -1773.780482 | -487.8241834 | -2261.604665 |
| TCGA-E7-A7DV-01A-11R-A33J-07 | 568.209344   | 2127.30066   | 2695.510004  |
| TCGA-HQ-A2OF-01A-11R-A26T-07 | -1767.350566 | -973.7110747 | -2741.061641 |
| TCGA-DK-AA6P-01A-11R-A39I-07 | -1680.012178 | -850.9457257 | -2530.957903 |
| TCGA-CF-A47Y-01A-11R-A23W-07 | -1708.484958 | -439.0111195 | -2147.496077 |



|                               |              |              |              |
|-------------------------------|--------------|--------------|--------------|
| TCGA-G2-A2EL-01A-12R-A18C-07  | -2124.970789 | -1658.358265 | -3783.329054 |
| TCGA-K4-A6MB-01A-11R-A31N-07  | -457.1787123 | -245.4388237 | -702.617536  |
| TCGA-CU-A3KJ-01A-11R-A21D-07  | -1059.523645 | 400.9905439  | -658.5331013 |
| TCGA-E7-A85H-01A-11R-A352-07  | -588.2514974 | 572.298086   | -15.95341146 |
| TCGA-G2-AA3C-01A-21R-A39I-07  | -37.48969662 | 2038.93435   | 2001.444653  |
| TCGA-DK-A3IN-01A-11R-A20F-07  | 465.616211   | 1027.236029  | 1492.85224   |
| TCGA-FJ-A3Z9-01A-11R-A26T-07  | -2017.966953 | -786.2358303 | -2804.202783 |
| TCGA-DK-A1AC-01A-11R-A13Y-07  | -22.76497704 | 943.8747838  | 921.1098068  |
| TCGA-C4-A0F1-01A-11R-A034-07  | -412.7782617 | 275.0028923  | -137.7753693 |
| TCGA-E7-A5KE-01A-11R-A28M-07  | -2261.04139  | -1028.366253 | -3289.407643 |
| TCGA-ZF-A9RM-01A-11R-A38B-07  | -2588.148024 | -922.9273562 | -3511.07538  |
| TCGA-CU-A72E-01A-12R-A33J-07  | -186.6435857 | 266.4353444  | 79.79175873  |
| TCGA-E7-A3Y1-01A-11R-A22U-07  | -1339.211405 | -158.9554072 | -1498.166812 |
| TCGA-FD-A5BV-01A-11R-A26T-07  | -1126.249514 | -514.0468952 | -1640.296409 |
| TCGA-UY-A78M-01A-21R-A352-07  | -344.521255  | -288.7816628 | -633.3029178 |
| TCGA-4Z-AA7R-01A-11R-A39I-07  | -1004.307293 | -722.8728613 | -1727.180154 |
| TCGA-FD-A3SM-01A-11R-A22U-07  | 136.8667851  | -63.02683872 | 73.83994641  |
| TCGA-BL-A5ZZ-01A-31R-A30C-07  | 959.5110654  | 1240.12303   | 2199.634095  |
| TCGA-CF-A1HS-01A-11R-A13Y-07  | -687.9632531 | 599.1528819  | -88.81037127 |
| TCGA-XF-AAMT-01A-11R-A42T-07  | 861.5669208  | 1019.31705   | 1880.883971  |
| TCGA-XF-A9SU-01A-31R-A39I-07  | 424.4102853  | 935.8789488  | 1360.289234  |
| TCGA-UY-A78L-01A-12R-A33J-07  | -283.35069   | 184.7672186  | -98.5834714  |
| TCGA-S5-A6DX-01A-11R-A31N-07  | 306.3621256  | 1893.493591  | 2199.855717  |
| TCGA-XF-A8HI-01A-11R-A38B-07  | -1606.874392 | -23.16932086 | -1630.043713 |
| TCGA-G2-A2EK-01A-22R-A18C-07  | -960.0274924 | 307.2632962  | -652.7641962 |
| TCGA-H4-A2HQ-01A-11R-A180-07  | -1815.266986 | -390.6468364 | -2205.913823 |
| TCGA-XF-A9SP-01A-11R-A39I-07  | 935.2435017  | 823.3006988  | 1758.544201  |
| TCGA-DK-A3IK-01A-32R-A21D-07  | -437.8304164 | -57.91427346 | -495.7446898 |
| TCGA-BL-A13J-01A-11R-A277-07  | 313.7952719  | -98.3449596  | 215.4503123  |
| TCGA-BL-A0C8-01A-11R-A277-07  | -523.2953681 | -161.1414728 | -684.4368409 |
| TCGA-BL-A13I-01A-11R-A277-07  | 801.5887458  | 2090.466539  | 2892.055285  |
| TCGA-CF-A47X-01A-31R-A23W-07  | -1848.82024  | -663.0271473 | -2511.847387 |
| TCGA-2F-A9KP-01A-11R-A38B-07  | -1709.896998 | -741.1543763 | -2451.051374 |
| TCGA-DK-A3IT-01A-31R-A20F-07  | -81.53021808 | 495.4069134  | 413.8766953  |
| TCGA-FD-A43P-01A-31R-A23W-07  | -317.5126138 | 1974.137375  | 1656.624761  |
| TCGA-DK-A3IV-01A-22R-A21D-07  | -1572.831352 | 1264.139589  | -308.6917635 |
| TCGA-GU-A762-01A-11R-A33J-07  | 402.0133415  | 2424.909083  | 2826.922424  |
| TCGA-GC-A3I6-01A-11R-A20F-07  | -537.0423196 | 845.8469502  | 308.8046306  |
| TCGA-FD-A6TA-01A-12R-A33J-07  | 523.898597   | 1256.301763  | 1780.20036   |
| TCGA-FD-A3SR-01A-11R-A22U-07  | 341.0635199  | 981.2454676  | 1322.308988  |
| TCGA-GU-AAATP-01A-11R-A39I-07 | 511.8350025  | 729.421091   | 1241.256094  |
| TCGA-DK-AA6X-01A-12R-A42T-07  | -609.4335956 | 860.3999819  | 250.9663863  |
| TCGA-XF-A9T3-01A-11R-A42T-07  | 492.7313344  | 1010.732116  | 1503.463451  |
| TCGA-DK-A3WW-01A-22R-A23N-07  | -503.2795337 | 1984.798444  | 1481.51891   |
| TCGA-K4-A3WS-01A-11R-A22U-07  | 1151.375337  | 1231.980508  | 2383.355845  |
| TCGA-UY-A9PA-01A-11R-A38B-07  | -1715.101731 | 809.5126444  | -905.5890863 |
| TCGA-ZF-A9RN-01A-11R-A42T-07  | -1208.53587  | 1068.752541  | -139.7833294 |
| TCGA-XF-AAMQ-01A-11R-A42T-07  | -743.6207282 | 1138.105582  | 394.4848539  |
| TCGA-CF-A1HR-01A-11R-A13Y-07  | -861.159498  | 358.8656037  | -502.2938943 |
| TCGA-E7-A3X6-01A-12R-A22U-07  | -676.5265375 | 1082.542682  | 406.0161441  |
| TCGA-GC-A3BM-01A-11R-A22U-07  | -1575.717898 | -69.24486766 | -1644.962766 |
| TCGA-GV-A6ZA-01A-12R-A33J-07  | -1425.267806 | 362.6185483  | -1062.649258 |
| TCGA-G2-A2EJ-01A-11R-A180-07  | -1373.677426 | 382.4072563  | -991.2701697 |
| TCGA-BT-A20Q-01A-11R-A14Y-07  | 411.1787277  | 1045.015366  | 1456.194094  |
| TCGA-SY-A9G5-01A-11R-A38B-07  | 770.7190819  | 1712.124038  | 2482.84312   |
| TCGA-4Z-AA7Q-01A-11R-A39I-07  | -563.8149181 | 1814.351433  | 1250.536515  |
| TCGA-FD-A5BT-01A-11R-A26T-07  | 1476.900148  | 2406.39686   | 3883.297008  |
| TCGA-E7-A6MF-01A-12R-A32O-07  | -1915.665027 | -335.4330596 | -2251.098087 |

|                              |              |              |              |
|------------------------------|--------------|--------------|--------------|
| TCGA-FT-A61P-01A-11R-A30C-07 | 644.0366851  | 1189.782331  | 1833.819016  |
| TCGA-DK-AA77-01A-11R-A39I-07 | -1499.781866 | 474.0717997  | -1025.710066 |
| TCGA-BT-A200-01A-21R-A14Y-07 | 1019.523722  | 3151.039523  | 4170.563245  |
| TCGA-XF-A9SZ-01A-11R-A39I-07 | 618.9346292  | 820.4232616  | 1439.357891  |
| TCGA-E7-A678-01A-11R-A30C-07 | -1978.549287 | -36.27803697 | -2014.827324 |
| TCGA-FD-A5BU-01A-31R-A26T-07 | 468.3143181  | 1326.942104  | 1795.256423  |
| TCGA-FD-A3N5-01A-11R-A21D-07 | -969.2172299 | 328.8625387  | -640.3546912 |
| TCGA-ZF-AA5H-01A-11R-A39I-07 | -231.0234485 | 1297.840865  | 1066.817417  |
| TCGA-YF-AA3L-01A-11R-A38B-07 | -1372.501922 | -170.2256283 | -1542.727551 |
| TCGA-XF-A8HB-01A-11R-A36F-07 | -2002.990837 | -439.7866781 | -2442.777515 |
| TCGA-ZF-AA4X-01A-11R-A38B-07 | -2533.601785 | -415.0545048 | -2948.656289 |
| TCGA-BT-A20P-01A-11R-A14Y-07 | -1572.721914 | -435.4062115 | -2008.128125 |
| TCGA-CF-A8HX-01A-11R-A36F-07 | -1670.945487 | -533.7359621 | -2204.681449 |
| TCGA-PQ-A6FI-01A-11R-A31N-07 | -1267.741531 | 437.6005744  | -830.1409566 |
| TCGA-DK-A6B2-01A-11R-A30C-07 | 609.0382062  | 1286.128871  | 1895.167077  |
| TCGA-4Z-AA86-01A-11R-A39I-07 | 638.1567973  | 1888.156489  | 2526.313286  |
| TCGA-5N-A9KI-01A-31R-A42T-07 | -48.34767329 | 719.9197549  | 671.5720816  |
| TCGA-GU-AATO-01A-11R-A39I-07 | -142.5775717 | 1144.076157  | 1001.498585  |
| TCGA-CF-A9FH-01A-11R-A38B-07 | -2008.774173 | -301.9735391 | -2310.747712 |
| TCGA-4Z-AA7O-01A-31R-A39I-07 | -668.3140391 | 624.4774728  | -43.83656624 |
| TCGA-GV-A3QI-01A-11R-A220-07 | -1923.958005 | -1225.787417 | -3149.745422 |
| TCGA-GD-A6C6-01A-21R-A31N-07 | -1109.785263 | 121.3666558  | -988.4186073 |
| TCGA-4Z-AA7Y-01A-11R-A39I-07 | -1795.928912 | -528.5197698 | -2324.448681 |
| TCGA-CU-A0YO-01A-11R-A10U-07 | -370.7622481 | 858.9446806  | 488.1824325  |
| TCGA-CF-A5UA-01A-11R-A28M-07 | -1631.416187 | -274.0619484 | -1905.478136 |
| TCGA-GU-A763-01A-11R-A32O-07 | -2043.548404 | -94.22525745 | -2137.773661 |
| TCGA-FD-A3B7-01A-31R-A20F-07 | 1307.473753  | 2178.621502  | 3486.095255  |
| TCGA-FD-A5C0-01A-11R-A28M-07 | -478.6449067 | 169.6606306  | -308.9842761 |
| TCGA-FD-A5BS-01A-21R-A26T-07 | 1676.875644  | 3222.838941  | 4899.714585  |
| TCGA-GV-A40E-01A-12R-A23N-07 | -649.5693633 | 378.9344242  | -270.6349391 |
| TCGA-G2-AA3B-01A-11R-A39I-07 | -1802.724911 | 265.3575045  | -1537.367407 |
| TCGA-K4-A54R-01A-11R-A26T-07 | 229.7982701  | 1383.333752  | 1613.132022  |
| TCGA-DK-A1AA-01A-11R-A13Y-07 | -1496.805699 | 26.4058372   | -1470.399862 |
| TCGA-DK-AA6R-01A-11R-A42T-07 | -955.068776  | 162.063047   | -793.005729  |
| TCGA-BT-A3PH-01A-11R-A220-07 | -1053.160723 | -435.3754732 | -1488.536196 |
| TCGA-DK-A3IS-01A-21R-A21D-07 | -1903.05477  | -224.8047015 | -2127.859471 |
| TCGA-XF-A9SJ-01A-11R-A39I-07 | 167.0876112  | 1410.224228  | 1577.311839  |
| TCGA-CF-A7I0-01A-22R-A352-07 | -505.7188032 | 53.7238252   | -451.994978  |
| TCGA-GC-A3YS-01A-11R-A23N-07 | 457.5273144  | 925.7018167  | 1383.229131  |
| TCGA-UY-A78O-01A-12R-A33J-07 | -940.4286026 | -76.3763374  | -1016.80494  |
| TCGA-E7-A6ME-01A-22R-A32O-07 | -1676.948414 | 170.375103   | -1506.573311 |
| TCGA-XF-AAN5-01A-11R-A42T-07 | -633.4749981 | 1476.43372   | 842.9587216  |
| TCGA-ZF-AA4T-01A-11R-A38B-07 | -1841.793029 | -429.0312969 | -2270.824326 |
| TCGA-FD-A6TE-01A-12R-A33J-07 | -1997.023821 | -138.1366701 | -2135.160492 |
| TCGA-FD-A6TB-01A-12R-A33J-07 | 463.5365261  | 2001.234907  | 2464.771433  |
| TCGA-FD-A3B8-01A-31R-A20F-07 | 1684.673792  | 2749.287768  | 4433.961561  |
| TCGA-XF-A9SY-01A-21R-A42T-07 | 574.6123891  | 2118.849622  | 2693.462011  |
| TCGA-CF-A9FF-01A-11R-A38B-07 | -671.0588926 | 427.4448425  | -243.61405   |
| TCGA-DK-A6B5-01A-11R-A31N-07 | -997.0761807 | 761.5287405  | -235.5474402 |
| TCGA-GC-A3RC-01A-11R-A22U-07 | -453.8394384 | 1424.27857   | 970.4391312  |
| TCGA-GV-A3QK-01B-11R-A23N-07 | -1312.556734 | 886.6372722  | -425.919462  |
| TCGA-GU-A764-01A-11R-A352-07 | 258.2604641  | 1446.796261  | 1705.056725  |
| TCGA-DK-A6B6-01A-11R-A30C-07 | -1527.169061 | 765.2468446  | -761.9222167 |
| TCGA-5N-A9KM-01A-11R-A42T-07 | -114.2816029 | 865.7125958  | 751.4309929  |
| TCGA-XF-A8HF-01A-11R-A36F-07 | -220.5700229 | 450.473264   | 229.9032411  |
| TCGA-ZF-AA4U-01A-11R-A38B-07 | -2331.30795  | -325.5973252 | -2656.905276 |
| TCGA-XF-A9T6-01A-11R-A42T-07 | -1275.929362 | 274.9708245  | -1000.958538 |
| TCGA-CF-A47V-01A-11R-A23W-07 | -885.9062731 | 359.3802344  | -526.5260387 |

|                              |              |              |              |
|------------------------------|--------------|--------------|--------------|
| TCGA-XF-A9SI-01A-11R-A39I-07 | 701.3164857  | 2861.25513   | 3562.571615  |
| TCGA-BT-A42F-01A-11R-A23W-07 | -263.0806128 | 2080.801078  | 1817.720466  |
| TCGA-ZF-A9RF-01A-11R-A38B-07 | -820.6767404 | 1900.256751  | 1079.58001   |
| TCGA-KQ-A41N-01A-11R-A33J-07 | -1310.12826  | -798.2579723 | -2108.386232 |
| TCGA-FD-A3B3-01A-12R-A206-07 | 728.4621731  | 2018.206635  | 2746.668808  |
| TCGA-ZF-A9R4-01A-11R-A38B-07 | -1667.657169 | 144.2200828  | -1523.437086 |
| TCGA-GV-A3QH-01A-11R-A220-07 | -2315.126991 | -796.1678231 | -3111.294814 |
| TCGA-DK-A6B1-01A-12R-A30C-07 | -1285.21522  | -450.0220625 | -1735.237282 |
| TCGA-BT-A3PJ-01A-21R-A220-07 | -690.013622  | 1040.838577  | 350.8249553  |
| TCGA-ZF-A9R7-01A-11R-A38B-07 | -1030.289194 | 2039.911953  | 1009.622759  |
| TCGA-FD-A3SO-01A-11R-A22U-07 | 376.3905814  | 1008.022168  | 1384.41275   |
| TCGA-E7-A97P-01A-11R-A38B-07 | 85.41712198  | 1758.170782  | 1843.587904  |
| TCGA-4Z-AA81-01A-11R-A39I-07 | -1339.501233 | 794.196638   | -545.3045952 |
| TCGA-2F-A9KQ-01A-11R-A38B-07 | -1267.917662 | -622.5833127 | -1890.500975 |
| TCGA-FD-A43Y-01A-21R-A26T-07 | 25.24793983  | 811.3713864  | 836.6193262  |
| TCGA-S5-AA26-01A-11R-A38B-07 | -1965.669533 | -651.4471161 | -2617.116649 |
| TCGA-BT-A42E-01A-11R-A23W-07 | -553.8595471 | 1714.42268   | 1160.563133  |
| TCGA-FD-A43X-01A-11R-A23W-07 | -1872.637832 | -561.1370293 | -2433.774861 |
| TCGA-BT-A20T-01A-11R-A14Y-07 | -61.98117668 | 758.9264427  | 696.945266   |
| TCGA-E7-A7DU-01A-11R-A32O-07 | -1609.985081 | -233.9700033 | -1843.955085 |
| TCGA-DK-A3WY-01A-11R-A22U-07 | 861.6143521  | 3106.438631  | 3968.052983  |
| TCGA-G2-A2EF-01A-12R-A18C-07 | -728.9693036 | 1674.273404  | 945.3041006  |
| TCGA-BT-A20V-01A-11R-A14Y-07 | -1678.36541  | 461.7712266  | -1216.594184 |
| TCGA-GU-AATQ-01A-11R-A39I-07 | -1143.554395 | 130.1087361  | -1013.445659 |
| TCGA-CU-A3QU-01A-11R-A22U-07 | -2122.563116 | -443.7451121 | -2566.308229 |
| TCGA-GD-A3OP-01A-21R-A220-07 | -4.885339164 | 306.2879674  | 301.4026282  |
| TCGA-KQ-A41P-01A-12R-A33J-07 | -113.0210206 | 511.7070521  | 398.6860315  |
| TCGA-UY-A9PH-01A-11R-A38B-07 | 195.566241   | 2037.051923  | 2232.618164  |
| TCGA-FD-A5BY-01A-31R-A28M-07 | -221.1067779 | 422.4666339  | 201.3598559  |
| TCGA-GC-A6I3-01A-11R-A31N-07 | -266.297353  | 1655.925947  | 1389.628594  |
| TCGA-ZF-A9R0-01A-11R-A38B-07 | -653.2427849 | 352.8323174  | -300.4104675 |
| TCGA-FD-A43S-01A-21R-A23W-07 | 789.0673245  | 2299.092267  | 3088.159592  |
| TCGA-DK-A6B0-01A-11R-A31N-07 | -1823.490888 | -271.5698067 | -2095.060694 |
| TCGA-KQ-A41Q-01A-11R-A33J-07 | -1488.340056 | -466.7211157 | -1955.061172 |
| TCGA-GC-A4ZW-01A-11R-A26T-07 | -1748.249737 | -605.5915716 | -2353.841309 |
| TCGA-DK-AA74-01A-11R-A39I-07 | 1437.047766  | 2409.08864   | 3846.136406  |
| TCGA-DK-A1AG-01A-11R-A13Y-07 | -1836.599059 | 150.1596338  | -1686.439426 |
| TCGA-UY-A78K-01A-11R-A33J-07 | -581.1620123 | 1809.74824   | 1228.586227  |
| TCGA-CF-A3MG-01A-11R-A20F-07 | -2232.594209 | -659.3294039 | -2891.923613 |
| TCGA-DK-A1A6-01A-11R-A13Y-07 | -511.8082838 | 952.039678   | 440.2313942  |
| TCGA-E7-A541-01A-11R-A26T-07 | -879.8186074 | 1257.309063  | 377.4904555  |
| TCGA-XF-A8HE-01A-11R-A36F-07 | -299.5006307 | 1338.901558  | 1039.400927  |
| TCGA-DK-AA6Q-01A-11R-A39I-07 | -1597.07376  | 1100.98942   | -496.0843402 |
| TCGA-GC-A3WC-01A-31R-A22U-07 | -226.1007212 | 1770.137538  | 1544.036817  |
| TCGA-K4-A4AC-01A-21R-A26T-07 | -581.9779849 | 970.3238015  | 388.3458166  |
| TCGA-K4-A5RH-01A-11R-A30C-07 | 909.439295   | 2532.638723  | 3442.078018  |
| TCGA-FD-A5C1-01A-11R-A28M-07 | 669.1189458  | 1824.191966  | 2493.310912  |
| TCGA-2F-A9KO-01A-11R-A38B-07 | -161.8736535 | 1493.746541  | 1331.872887  |
| TCGA-XF-A9T8-01A-11R-A39I-07 | 332.4904965  | 2014.121867  | 2346.612363  |
| TCGA-CU-A3YL-01A-11R-A22U-07 | -1022.911338 | -156.5561219 | -1179.46746  |
| TCGA-E7-A7XN-01A-11R-A352-07 | -973.6604474 | 1940.965514  | 967.3050663  |
| TCGA-4Z-AA7W-01A-11R-A39I-07 | -120.2389766 | 2503.076128  | 2382.837152  |
| TCGA-FD-A43U-01A-11R-A23W-07 | 1011.250719  | 2322.557889  | 3333.808608  |
| TCGA-ZF-A9R3-01A-11R-A38B-07 | -1250.781485 | 213.0911189  | -1037.690366 |
| TCGA-4Z-AA89-01A-11R-A39I-07 | -2259.354207 | -109.1984497 | -2368.552657 |
| TCGA-XF-AAN2-01A-11R-A42T-07 | -975.3213791 | 930.8740714  | -44.44730766 |
| TCGA-GU-A766-01A-11R-A32O-07 | 195.0621659  | 2466.897305  | 2661.95947   |
| TCGA-FD-A6TD-01A-51R-A33J-07 | 248.8665104  | 1641.192188  | 1890.058699  |

|                              |              |              |              |
|------------------------------|--------------|--------------|--------------|
| TCGA-FD-A3B4-01A-12R-A206-07 | 133.3733211  | 1361.332141  | 1494.705462  |
| TCGA-DK-A1AB-01A-11R-A13Y-07 | 916.5544277  | 983.9636554  | 1900.518083  |
| TCGA-UY-A9PB-01A-11R-A38B-07 | 742.0603299  | 1956.712288  | 2698.772618  |
| TCGA-XF-AAML-01A-11R-A42T-07 | -2047.822511 | 202.3436944  | -1845.478817 |
| TCGA-ZF-AA58-01A-12R-A42T-07 | 805.6731736  | 2438.800865  | 3244.474039  |
| TCGA-YC-A9TC-01A-22R-A39I-07 | -993.9997731 | -219.0162723 | -1213.016045 |
| TCGA-K4-A6FZ-01A-11R-A31N-07 | -986.3385852 | 906.9215332  | -79.41705203 |
| TCGA-KQ-A41R-01A-21R-A352-07 | -1385.798899 | -409.5779862 | -1795.376885 |
| TCGA-DK-AA6M-01A-11R-A39I-07 | -61.36532586 | 1635.813719  | 1574.448393  |
| TCGA-K4-A5RJ-01A-11R-A28M-07 | 430.9058846  | 2851.186287  | 3282.092172  |
| TCGA-HQ-A5ND-01A-11R-A26T-07 | -1768.411829 | -161.6735963 | -1930.085425 |
| TCGA-BT-A3PK-01A-21R-A220-07 | 292.6698977  | 996.6827945  | 1289.352692  |
| TCGA-FD-A3N6-01A-11R-A21D-07 | -1115.554824 | 282.5503169  | -833.0045073 |
| TCGA-UY-A78P-01A-12R-A36F-07 | 145.8544856  | 2022.382299  | 2168.236785  |
| TCGA-CF-A9FM-01A-11R-A38B-07 | -1596.205833 | 186.8179386  | -1409.387894 |
| TCGA-ZF-A9RD-01A-11R-A42T-07 | -252.8536021 | 1869.219779  | 1616.366177  |
| TCGA-E5-A2PC-01A-11R-A206-07 | -1609.003846 | 428.8184961  | -1180.18535  |
| TCGA-GD-A76B-01A-11R-A32O-07 | -790.3707292 | 1389.137916  | 598.7671868  |
| TCGA-GC-A6I1-01A-12R-A31N-07 | -226.3933988 | 2385.615733  | 2159.222334  |
| TCGA-XF-A9SK-01A-11R-A42T-07 | 753.839608   | 1232.181322  | 1986.02093   |
| TCGA-FD-A3SQ-01A-21R-A22U-07 | 826.3206792  | 874.748291   | 1701.06897   |
| TCGA-XF-AANI-01A-31R-A42T-07 | -1533.309465 | -179.8087465 | -1713.118212 |
| TCGA-CF-A3MI-01A-11R-A20F-07 | -1083.354352 | 305.0378533  | -778.316499  |
| TCGA-XF-AAMZ-01A-11R-A42T-07 | -1040.171478 | 277.0433006  | -763.1281777 |
| TCGA-DK-AA6L-01A-11R-A39I-07 | -996.4174984 | 806.9454933  | -189.4720052 |
| TCGA-XF-A9T4-01A-11R-A39I-07 | -766.355213  | 633.6415239  | -132.7136891 |
| TCGA-UY-A8OB-01A-12R-A42T-07 | -1353.194513 | 559.3032572  | -793.8912562 |
| TCGA-ZF-A9R5-01A-12R-A42T-07 | -1815.834321 | -129.4551807 | -1945.289502 |
| TCGA-DK-AA6S-01A-21R-A39I-07 | 782.7296813  | 1143.21047   | 1925.940151  |
| TCGA-E7-A8O8-01A-11R-A36F-07 | -1496.13599  | -257.3871474 | -1753.523137 |
| TCGA-XF-A9SM-01A-11R-A42T-07 | 634.4185294  | 2503.287899  | 3137.706429  |
| TCGA-XF-A8HC-01A-11R-A36F-07 | -2107.396829 | -1006.849264 | -3114.246093 |
| TCGA-ZF-AA4W-01A-12R-A38B-07 | -1370.094795 | -28.20276328 | -1398.297558 |
| TCGA-LC-A66R-01A-41R-A30C-07 | -318.2627684 | 1546.1339    | 1227.871132  |
| TCGA-E7-A8O7-01A-11R-A36F-07 | -1388.360374 | 619.6363924  | -768.7239817 |
| TCGA-LT-A8JT-01A-11R-A36F-07 | -1556.331424 | 130.824802   | -1425.506622 |
| TCGA-G2-A2ES-01A-11R-A180-07 | -68.42878294 | 858.0730644  | 789.6442814  |
| TCGA-XF-AAN4-01A-11R-A42T-07 | 1656.09277   | 2083.460102  | 3739.552872  |
| TCGA-4Z-AA83-01A-11R-A39I-07 | -892.8526444 | 433.9900057  | -458.8626387 |
| TCGA-ZF-AA4V-01A-11R-A38B-07 | -501.210461  | 835.9013809  | 334.6909199  |
| TCGA-ZF-AA53-01A-11R-A39I-07 | 627.4177166  | 1716.30379   | 2343.721506  |
| TCGA-2F-A9KR-01A-11R-A38B-07 | -1517.31536  | -265.5124642 | -1782.827825 |
| TCGA-E5-A4U1-01A-11R-A31N-07 | -2138.538263 | -1004.774796 | -3143.313059 |
| TCGA-FD-A6TC-01A-21R-A33J-07 | 275.8638956  | 92.00264738  | 367.866543   |
| TCGA-DK-A2I4-01A-11R-A21D-07 | 1185.889107  | 2810.607313  | 3996.49642   |
| TCGA-E7-A519-01A-11R-A26T-07 | -862.9036785 | 1295.520672  | 432.616994   |
| TCGA-DK-A3IU-01A-11R-A20F-07 | 907.4536714  | 2780.344056  | 3687.797727  |
| TCGA-FD-A62N-01A-11R-A30C-07 | 1349.404838  | 3059.573389  | 4408.978227  |
| TCGA-BT-A20J-01A-11R-A14Y-07 | -349.6230465 | 1808.946079  | 1459.323032  |
| TCGA-DK-AA71-01A-31R-A39I-07 | -1331.309229 | -277.1844743 | -1608.493703 |
| TCGA-KQ-A41O-01A-12R-A352-07 | -2613.724799 | -1515.696098 | -4129.420897 |
| TCGA-E7-A677-01A-11R-A30C-07 | -1148.375527 | 130.352718   | -1018.022809 |
| TCGA-DK-A1A5-01A-11R-A13Y-07 | 318.5220176  | 370.5145254  | 689.0365431  |
| TCGA-HQ-A5NE-01A-12R-A28M-07 | -476.961112  | 355.1763586  | -121.7847534 |
| TCGA-CF-A47S-01A-11R-A23W-07 | -1566.93325  | 225.0535836  | -1341.879666 |
| TCGA-FD-A6TK-01A-42R-A33J-07 | 899.7378973  | 1612.090718  | 2511.828615  |
| TCGA-E7-A5KF-01A-11R-A28M-07 | -2486.722808 | -588.0182852 | -3074.741093 |
| TCGA-XF-A9T5-01A-11R-A42T-07 | 63.12894021  | 2157.275735  | 2220.404675  |

|                              |              |             |              |
|------------------------------|--------------|-------------|--------------|
| TCGA-XF-A9SX-01A-21R-A39I-07 | 957.0337531  | 1915.062531 | 2872.096284  |
| TCGA-XF-A8HD-01A-11R-A36F-07 | -290.1865231 | 1430.546284 | 1140.359761  |
| TCGA-GV-A3JX-01A-11R-A20F-07 | -1347.360869 | 611.0888419 | -736.2720272 |

---

Figure S1

A

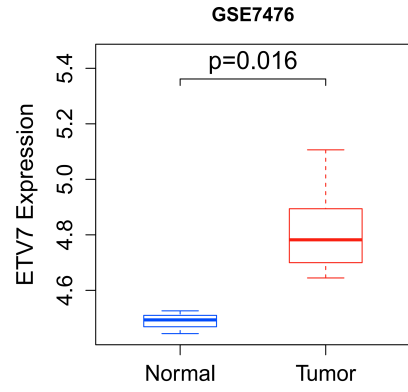

B

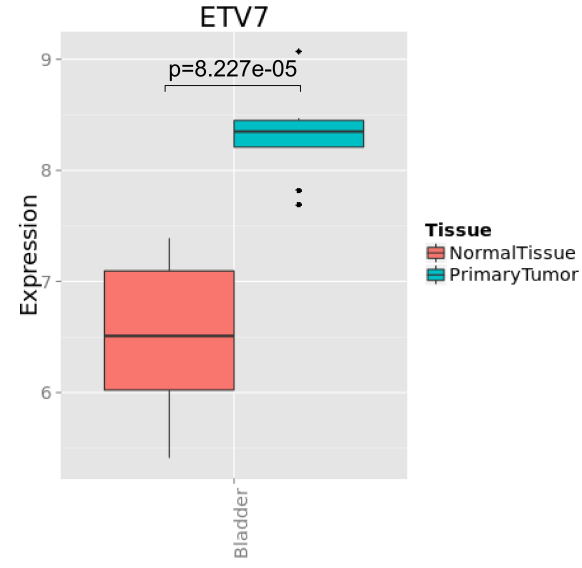

C

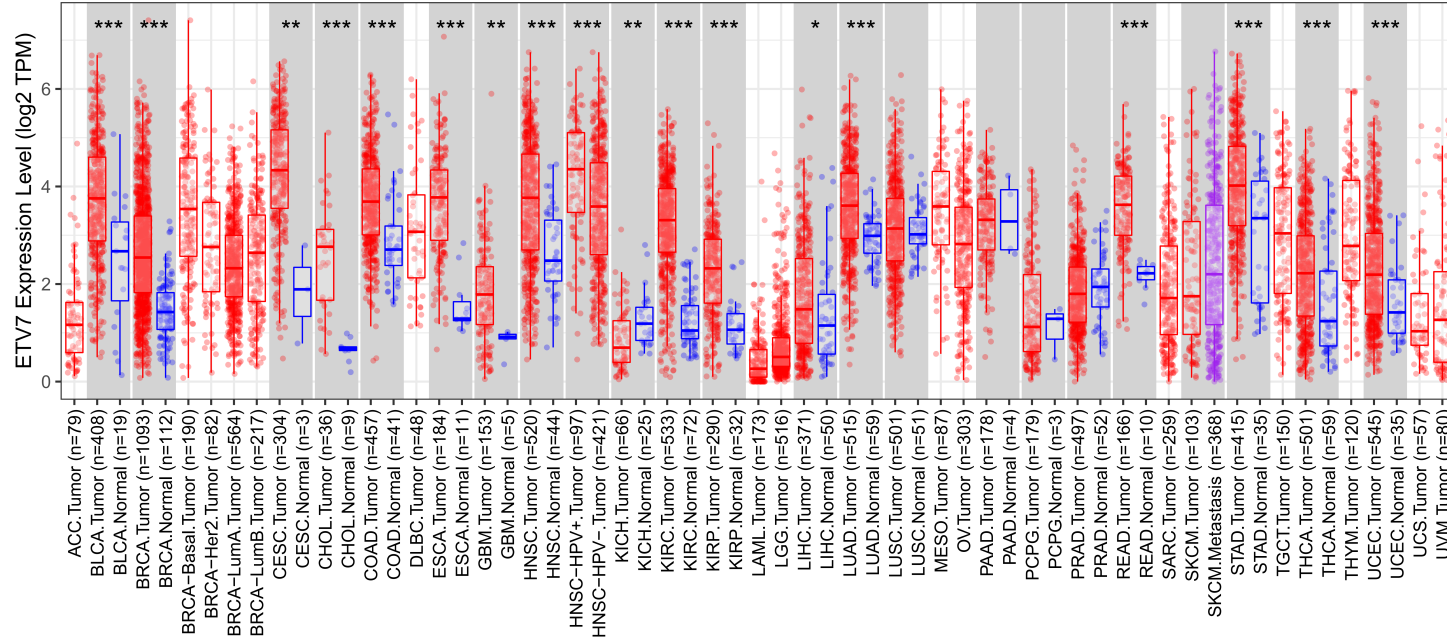

Supplement: f1 [file 8530186.f1.pdf]
